# Supplementary material for: Characterization of Lipid Profiles after Dietary Intake of Polyunsaturated Fatty Acids Using Integrated Untargeted and Targeted Lipidomics
Source: MDPI journal article supplement (doi:10.3390/metabo9100241), 2019-10-21

001\_\_PGE2

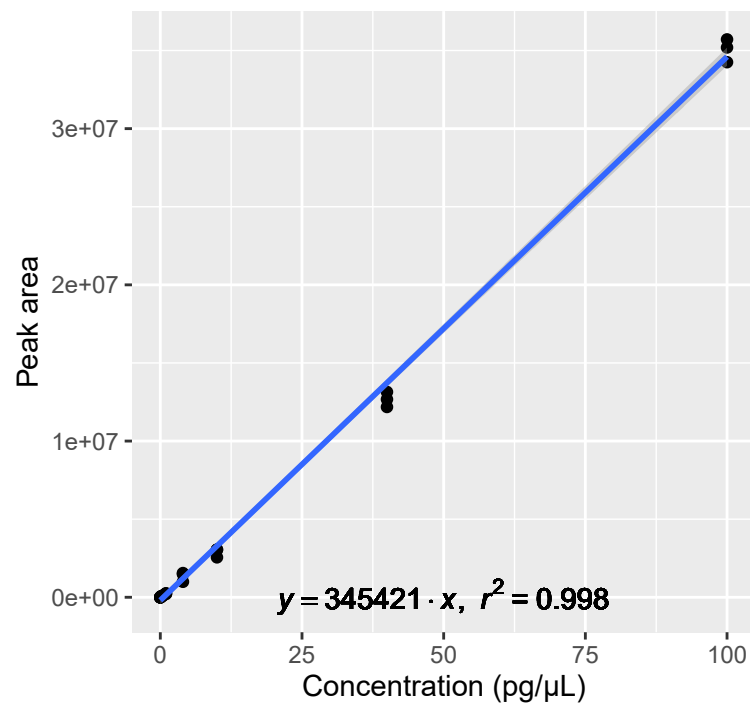

002\_\_PGD2

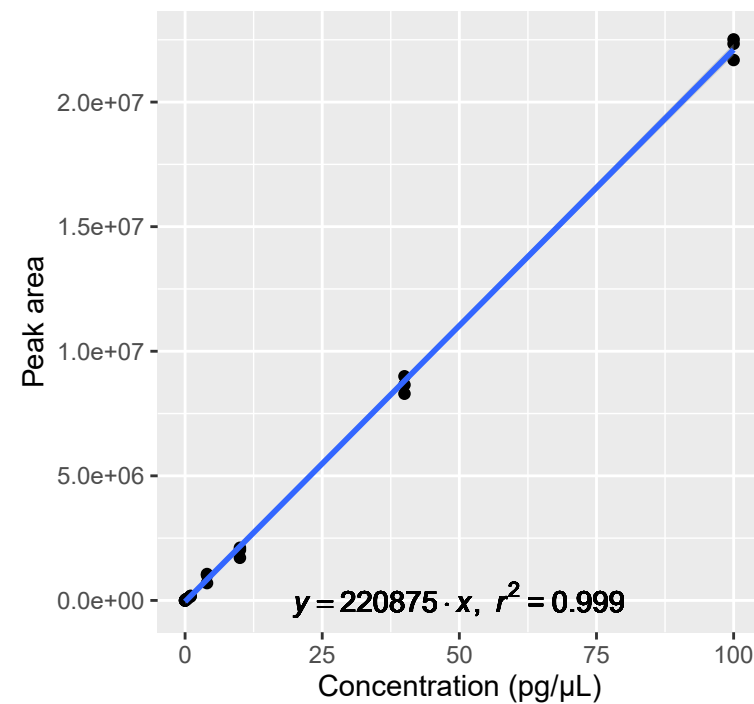

004\_\_15-keto-PGE2

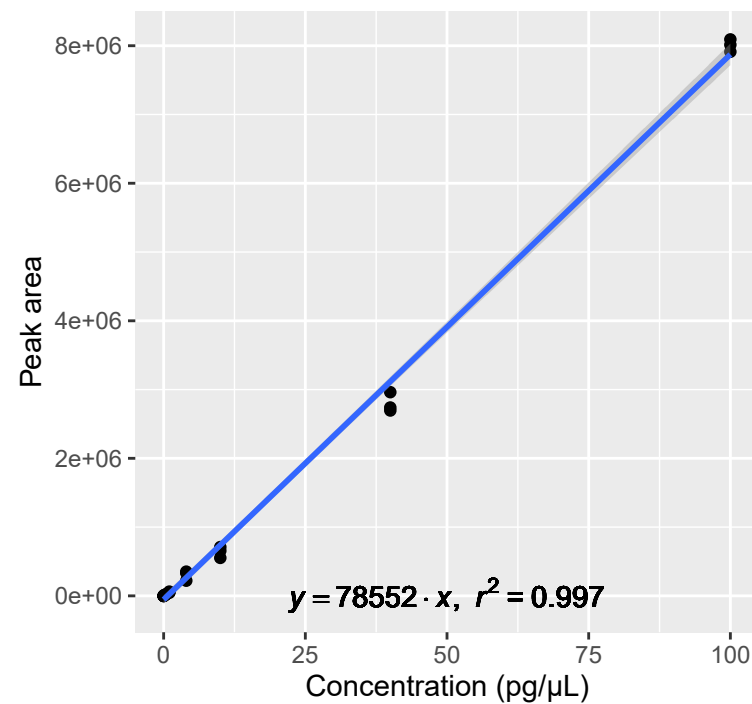

005\_\_PGE2-20OH

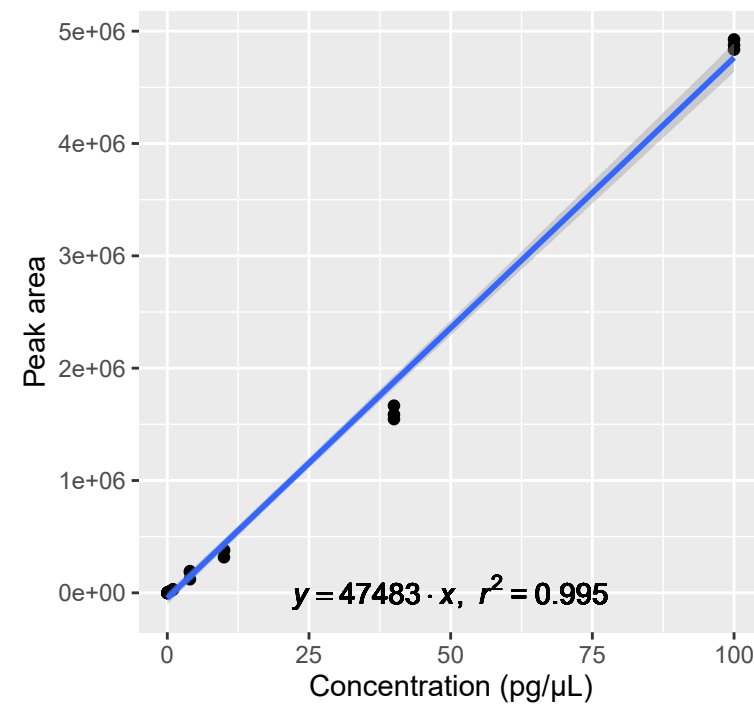

007\_\_15-deoxy-PGJ2

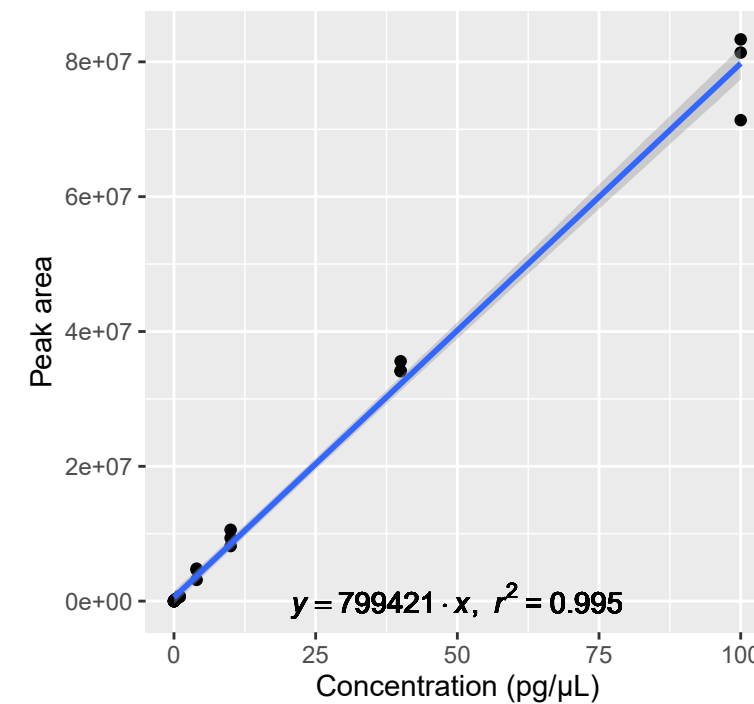

008\_\_PGF2a

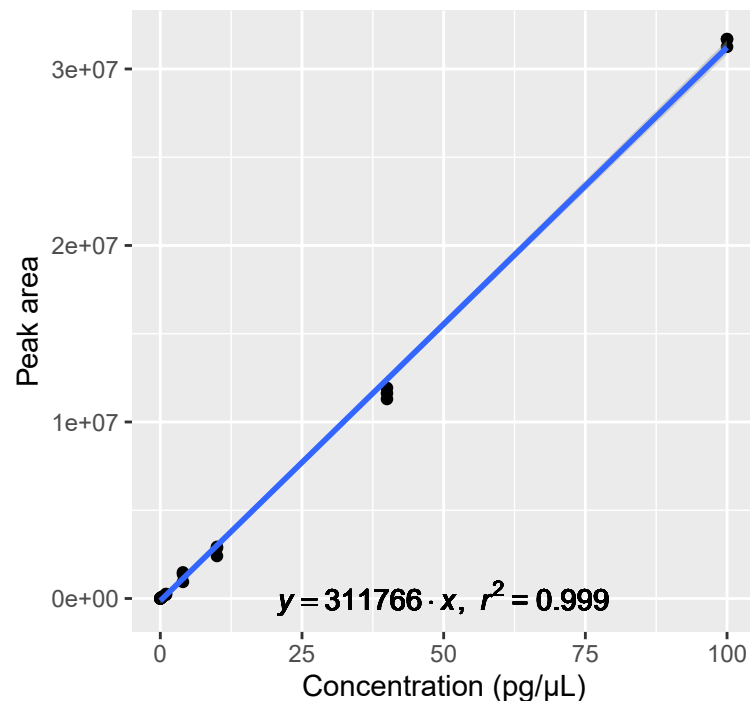

009\_\_6-keto-PGF1a

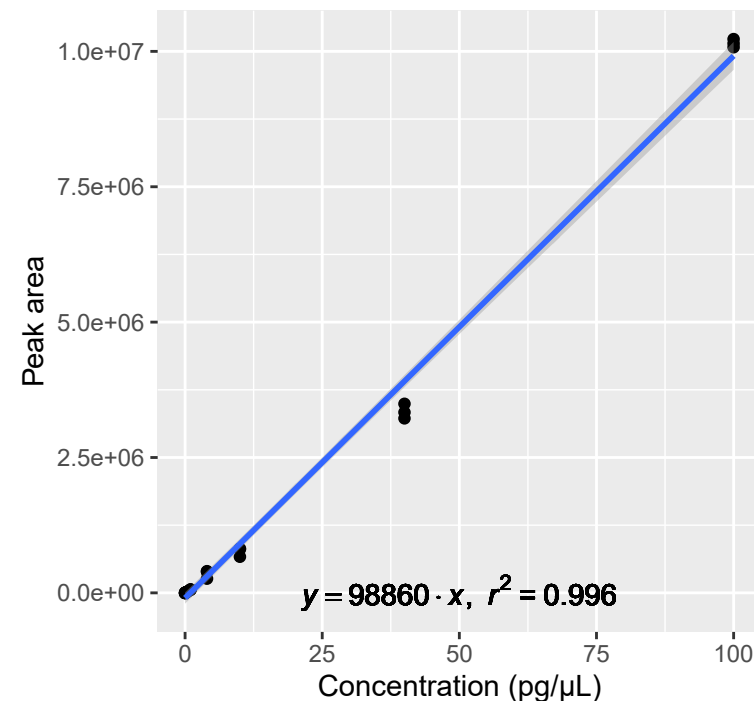

011\_\_TXB2

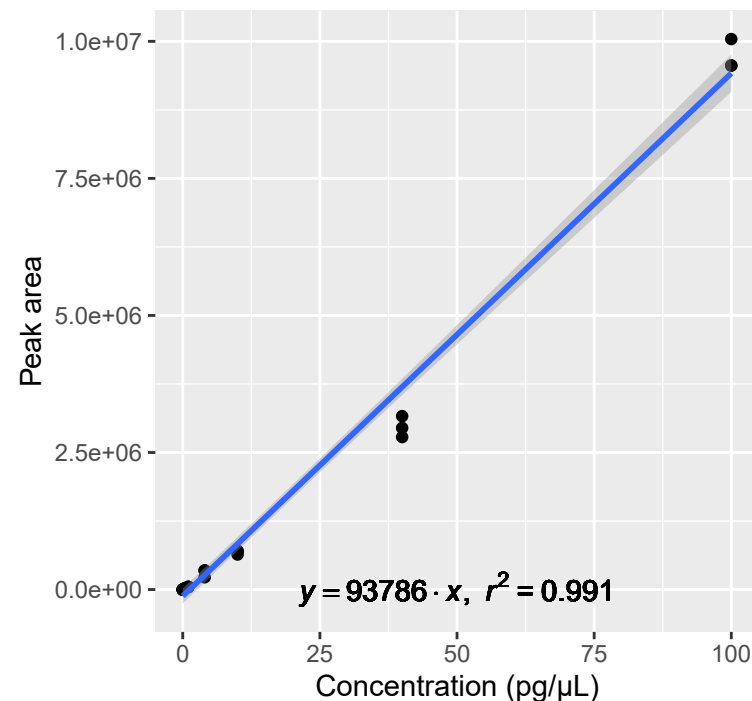

012\_\_12-HHTrE

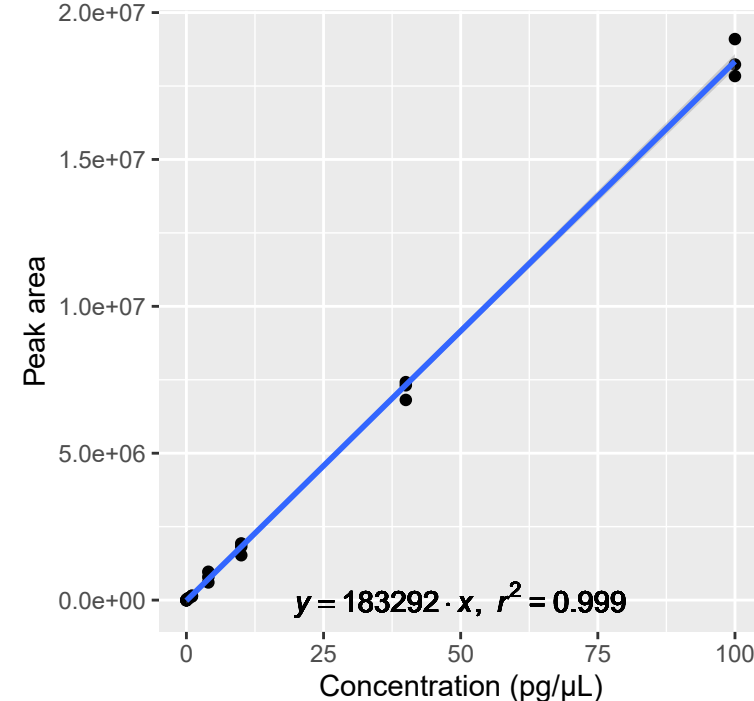

014\_\_LTB4

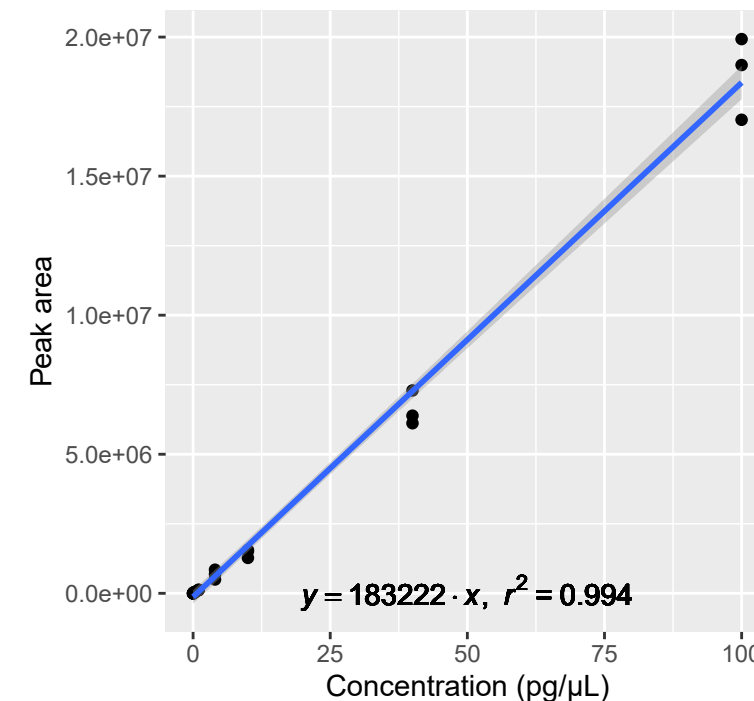

015\_\_LTB4-20OH

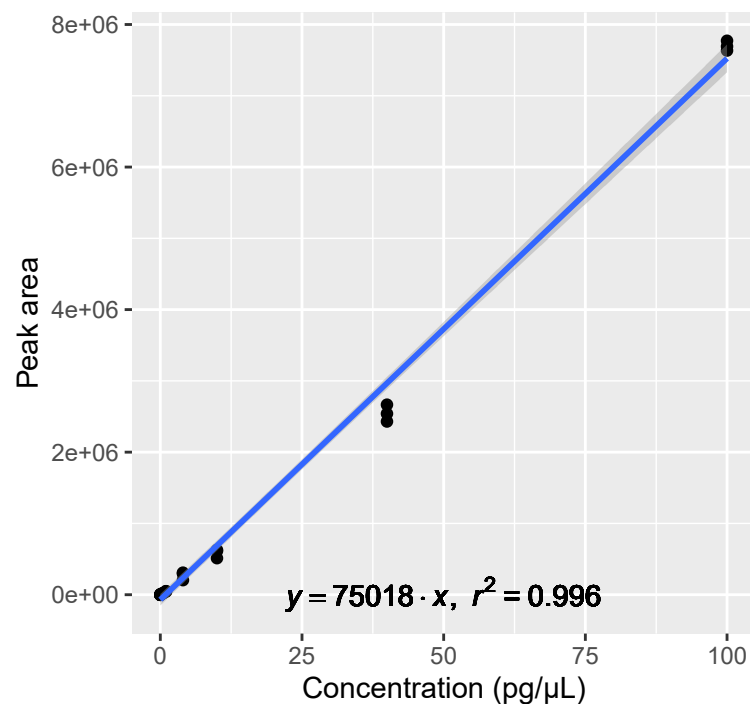

025\_\_LXA4

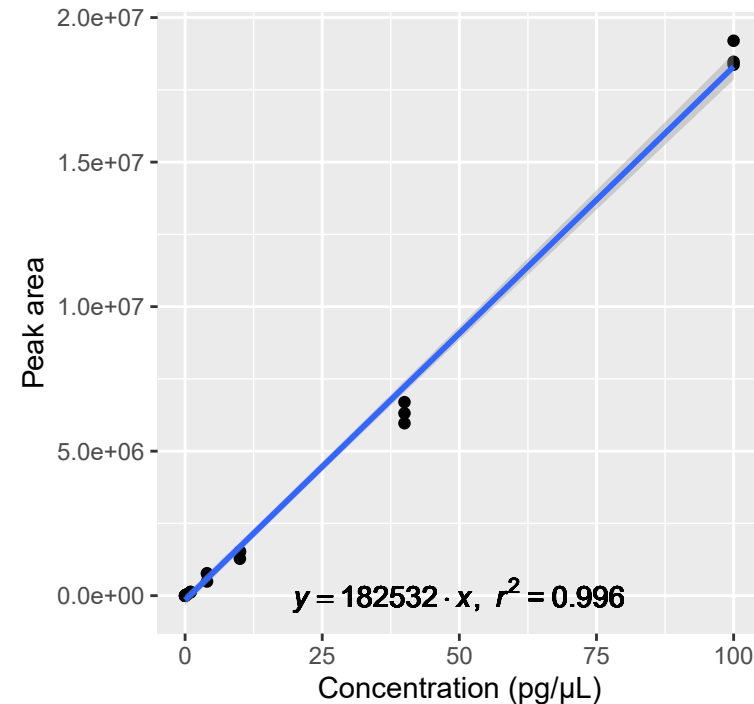

027\_\_LXB4

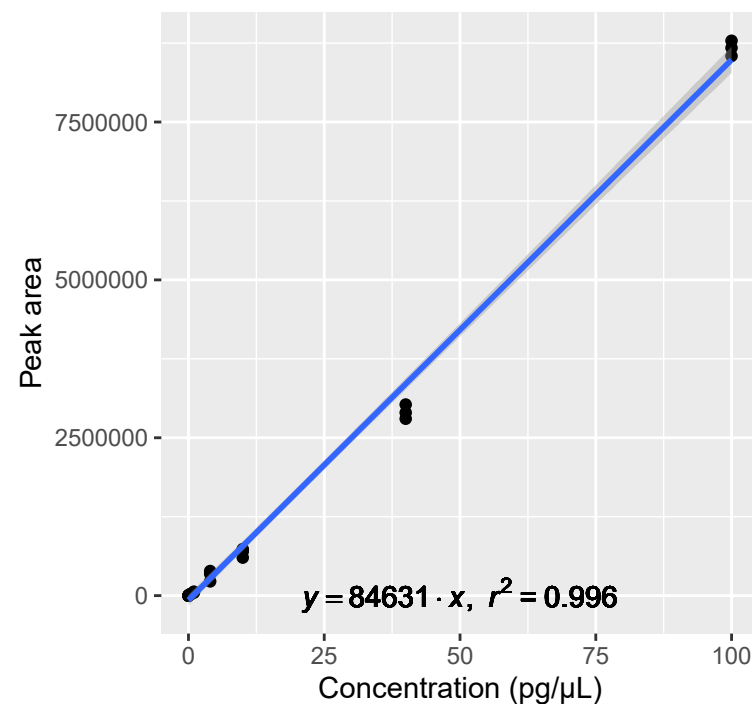

028\_\_5-HETE

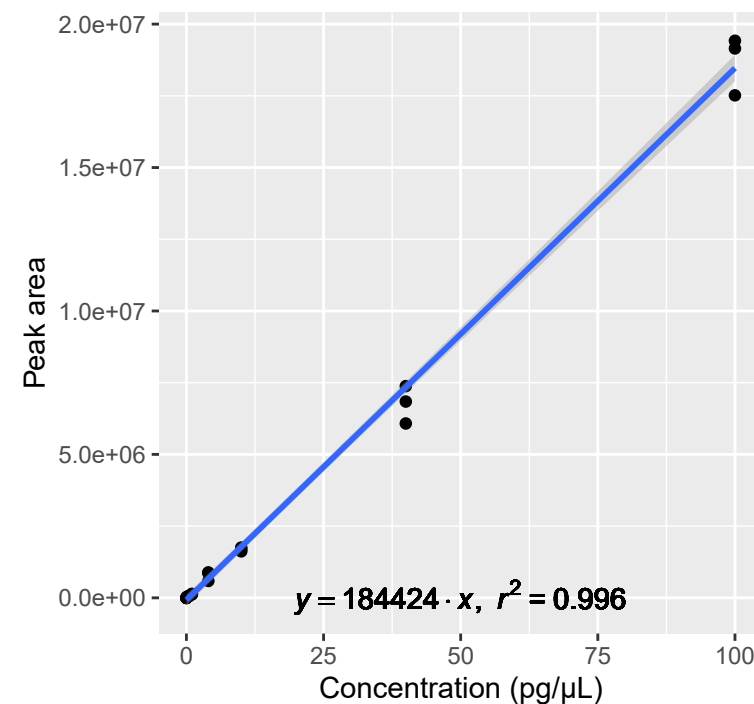

031\_\_8-HETE

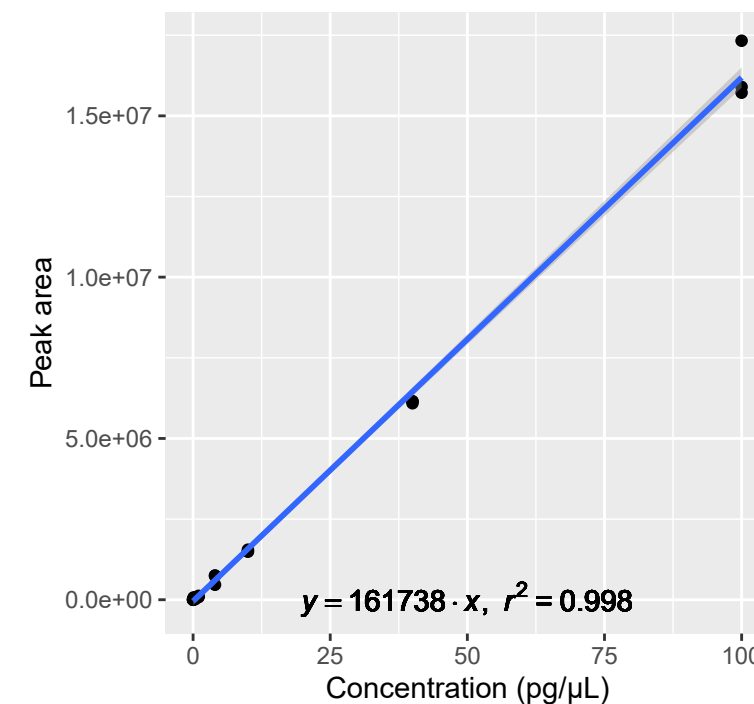

032\_\_9-HETE

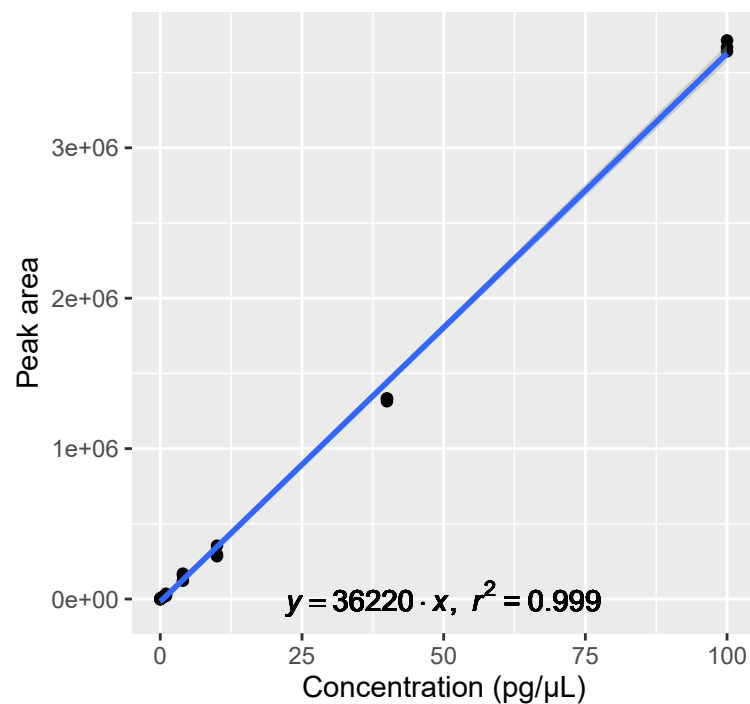

035\_\_11-HETE

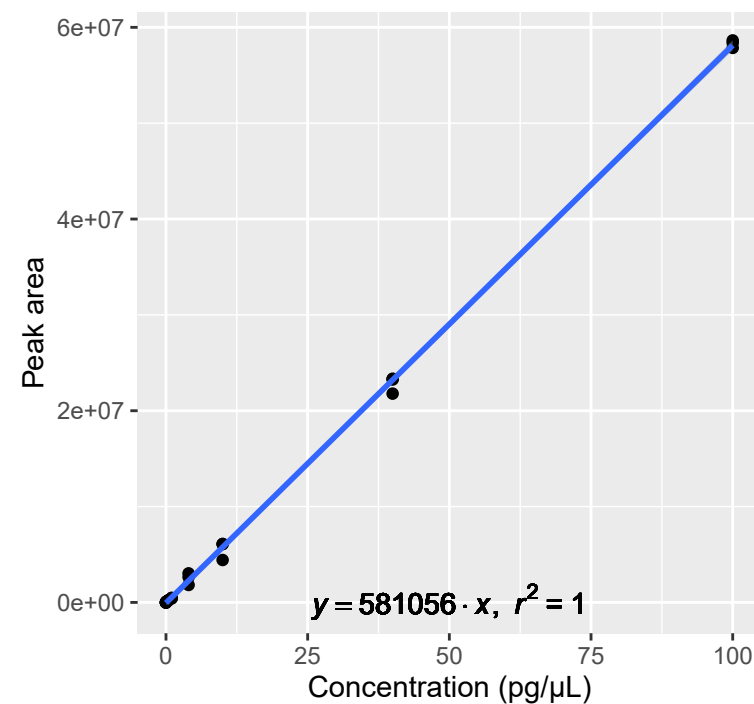

036\_\_12-HETE

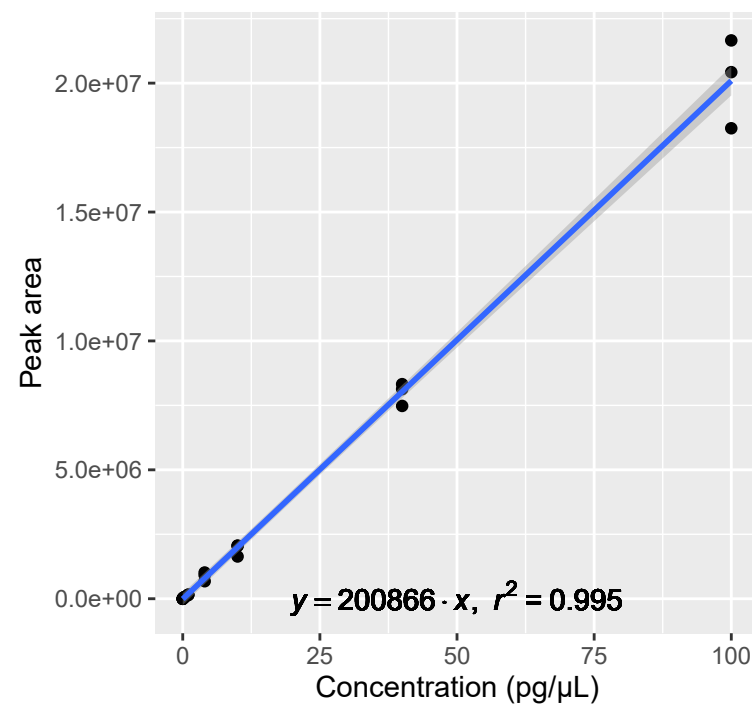

037\_\_11,12-EET

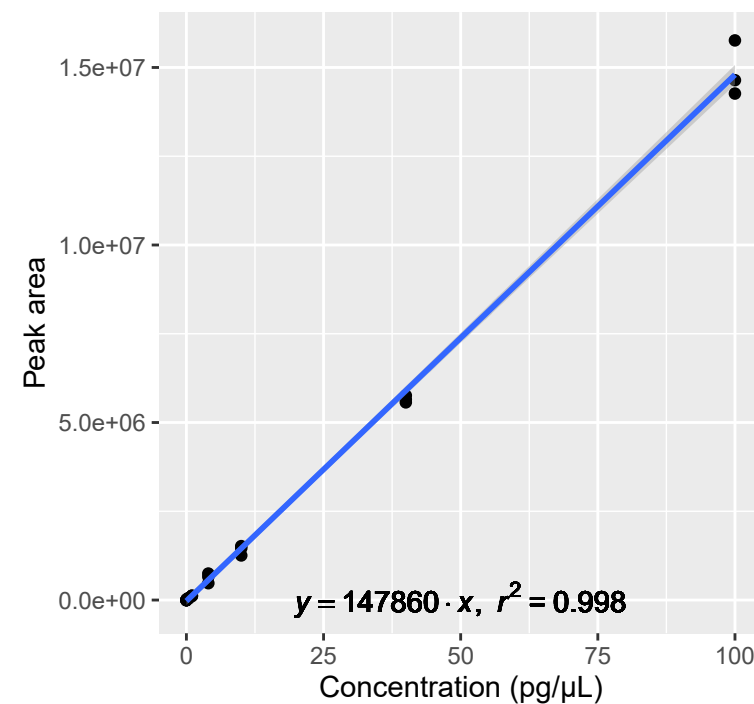

038\_\_11,12-DHT

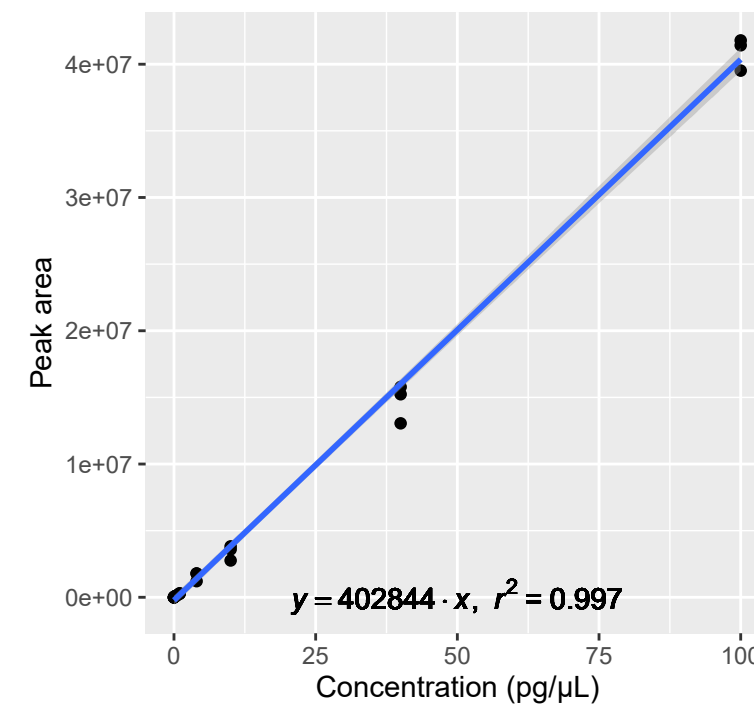

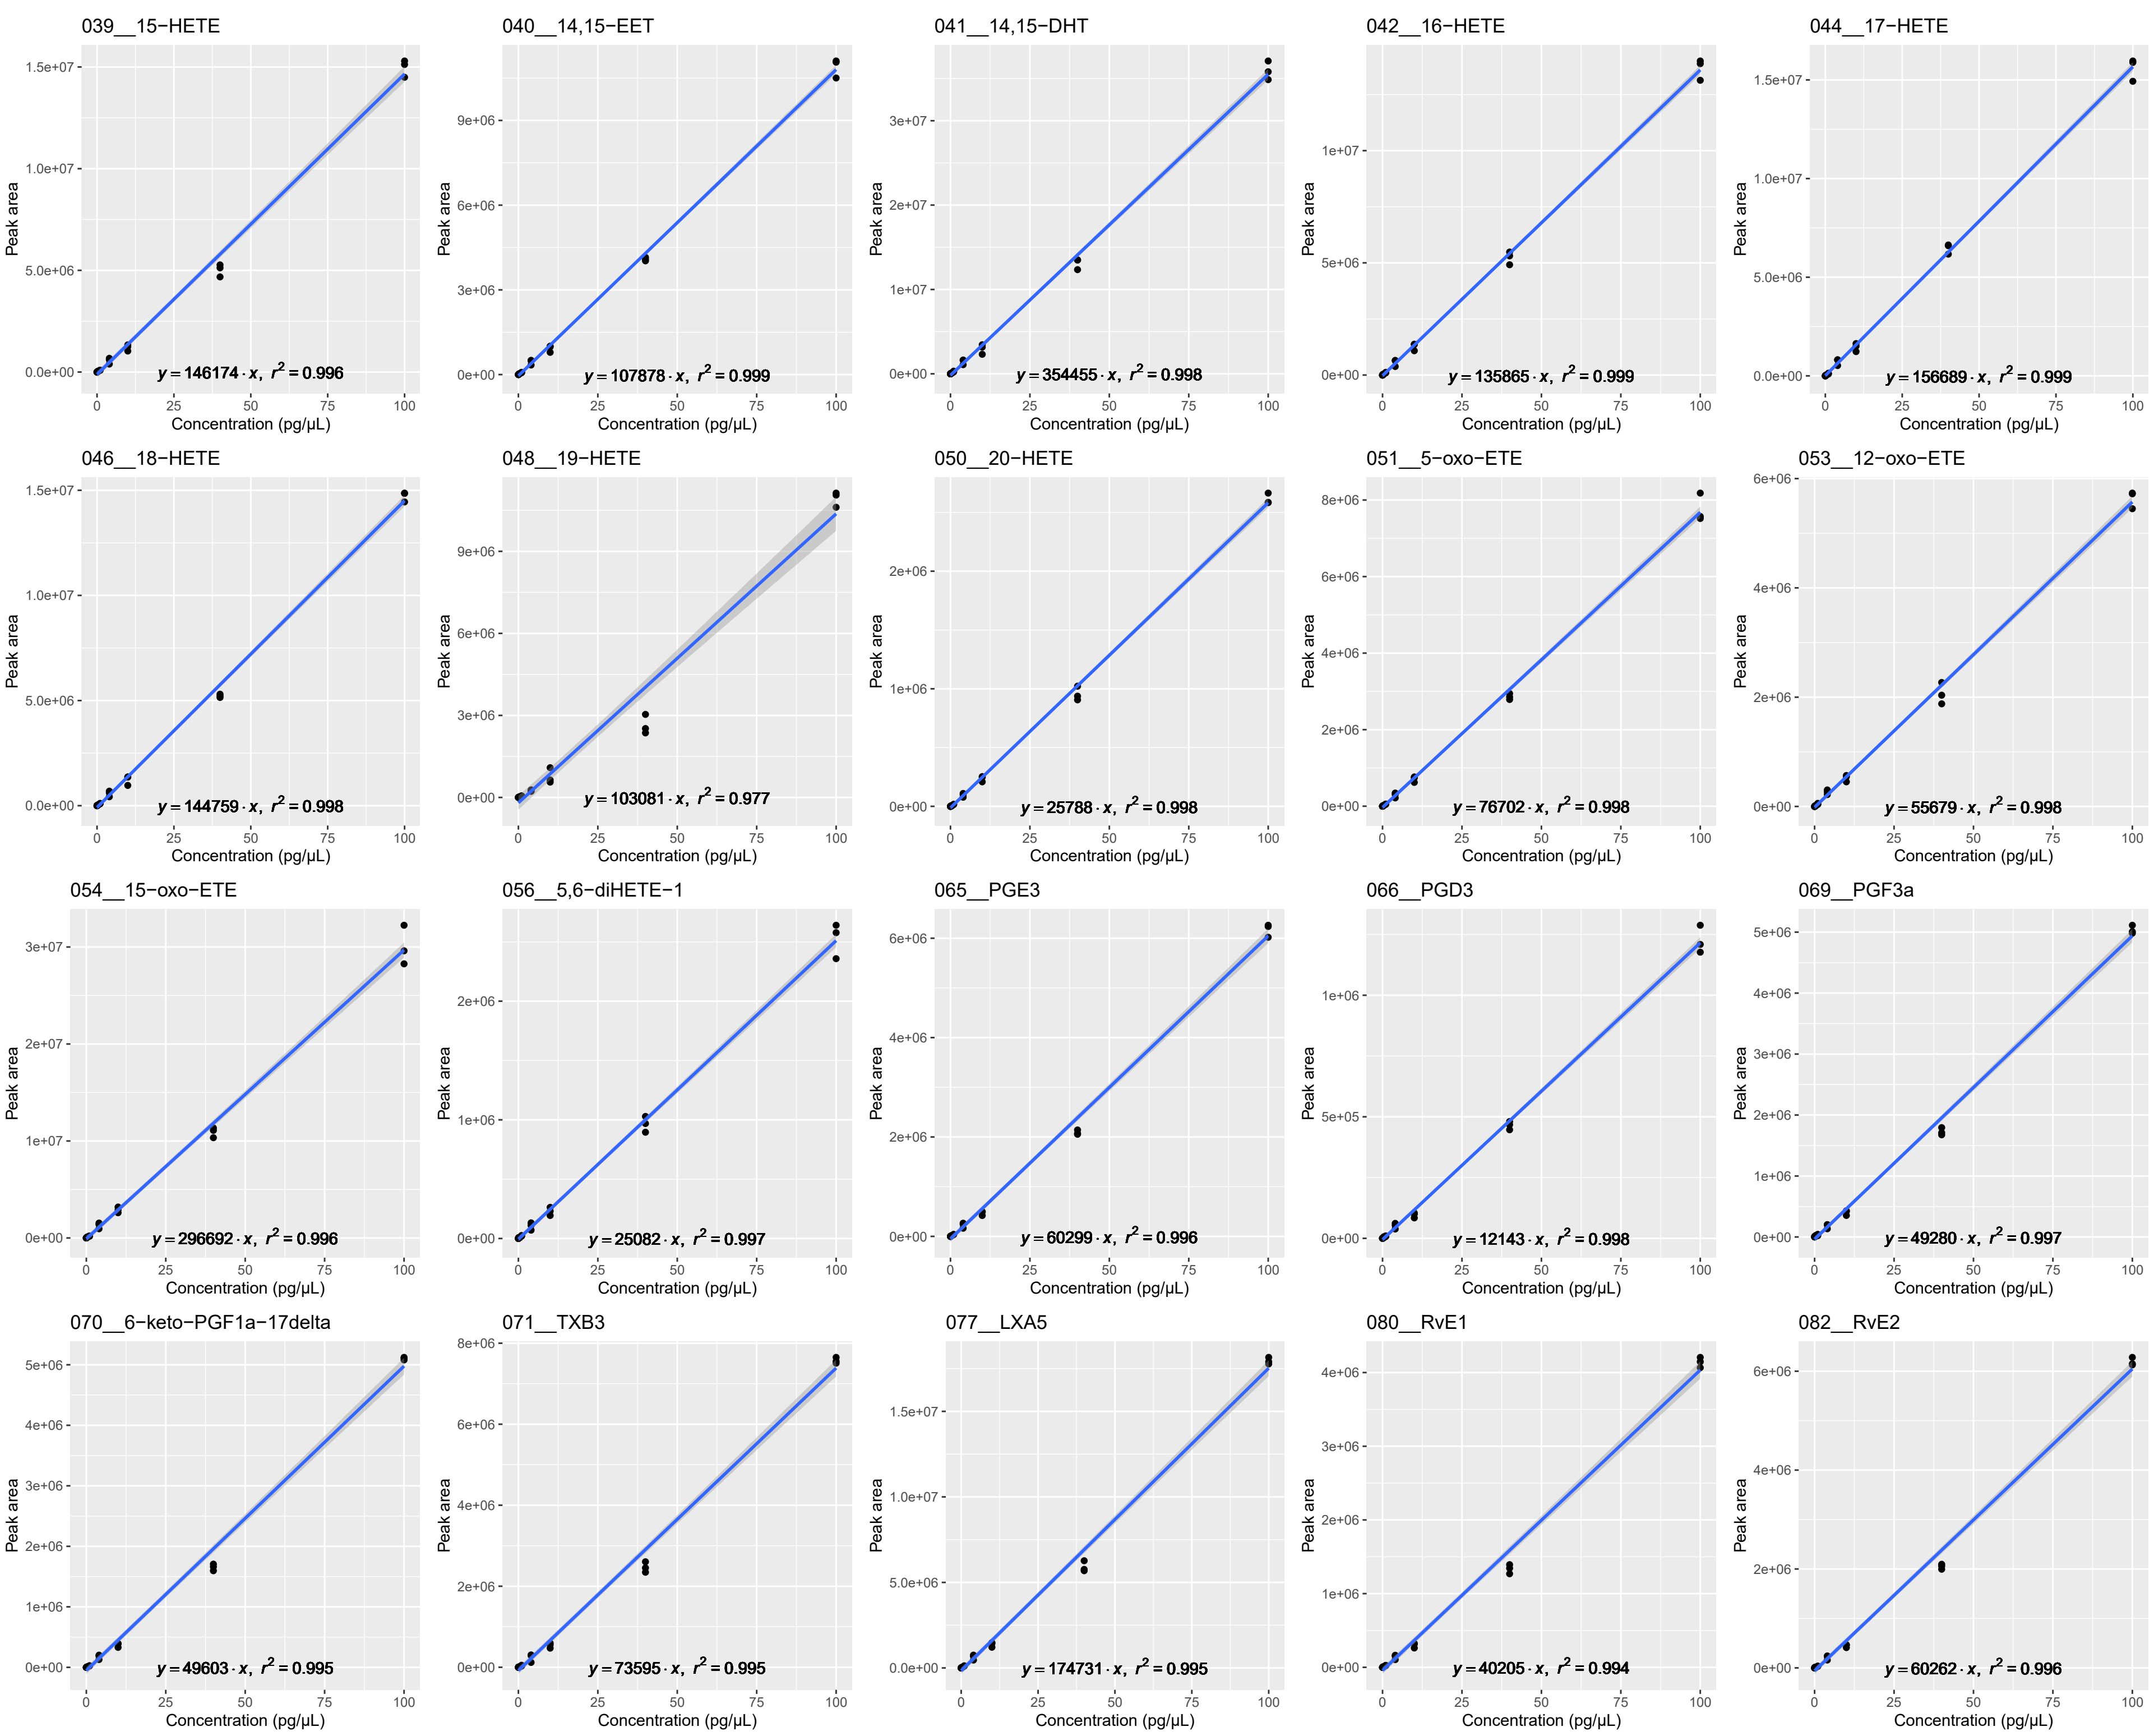

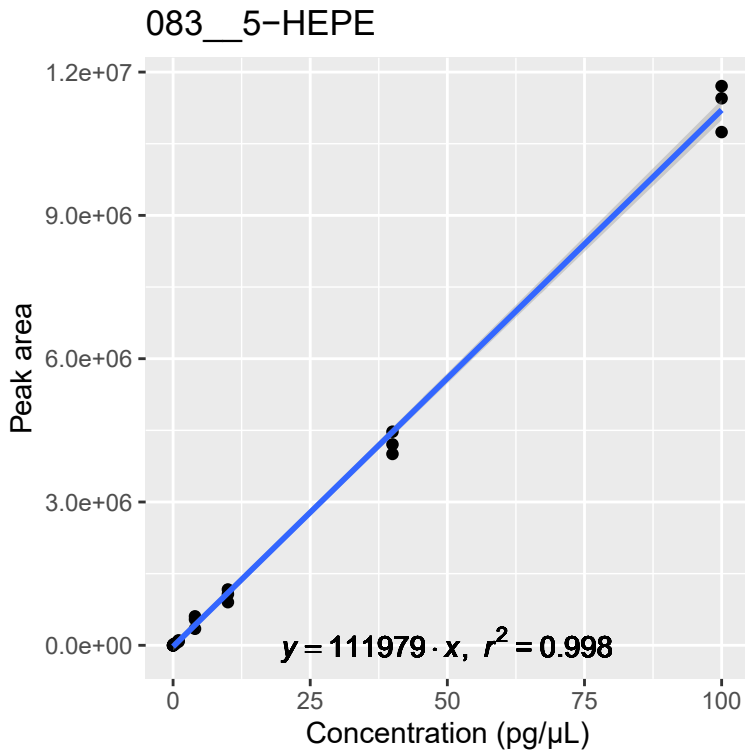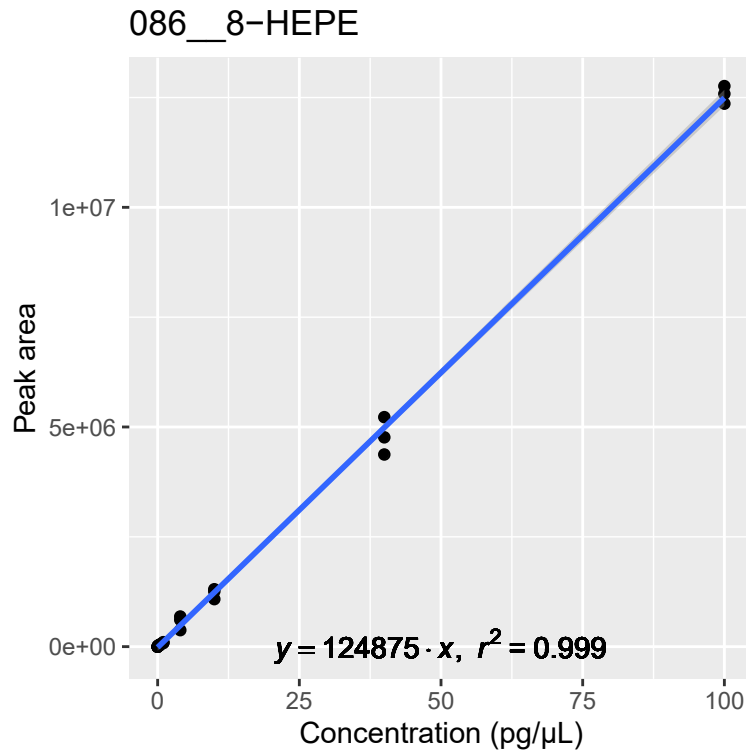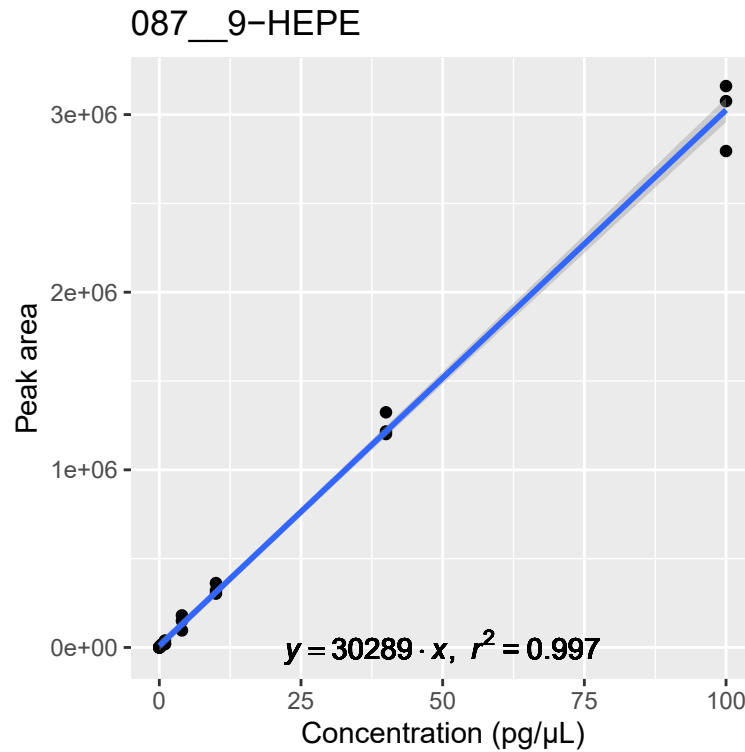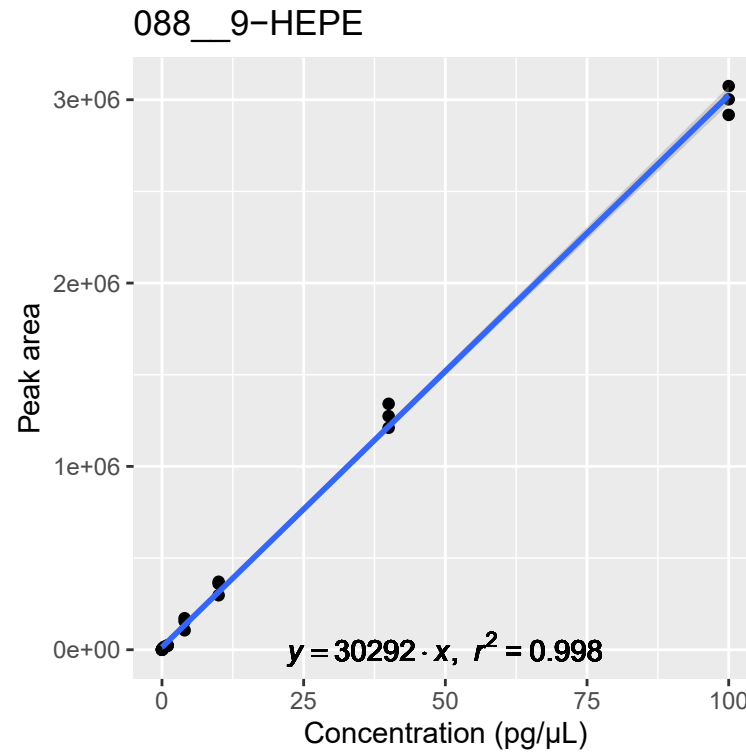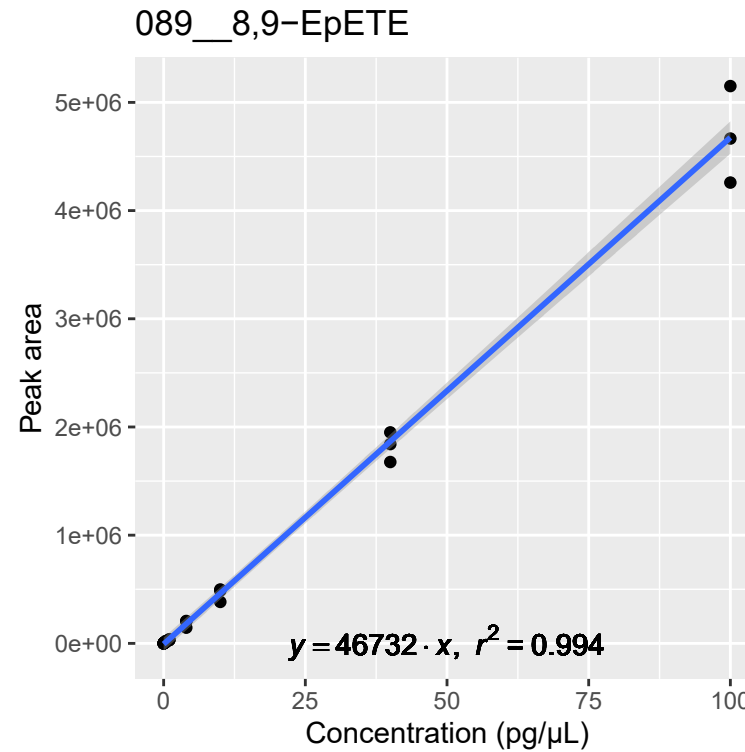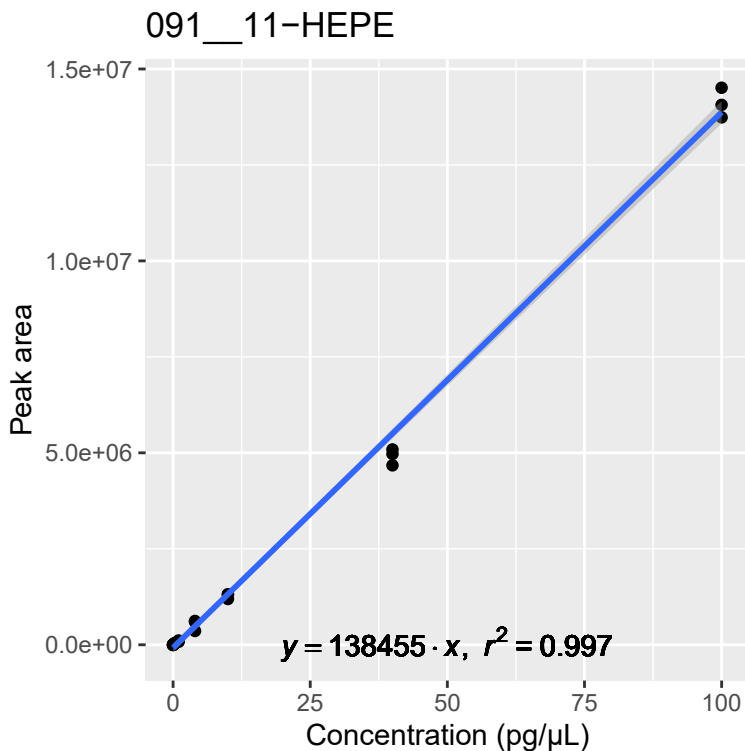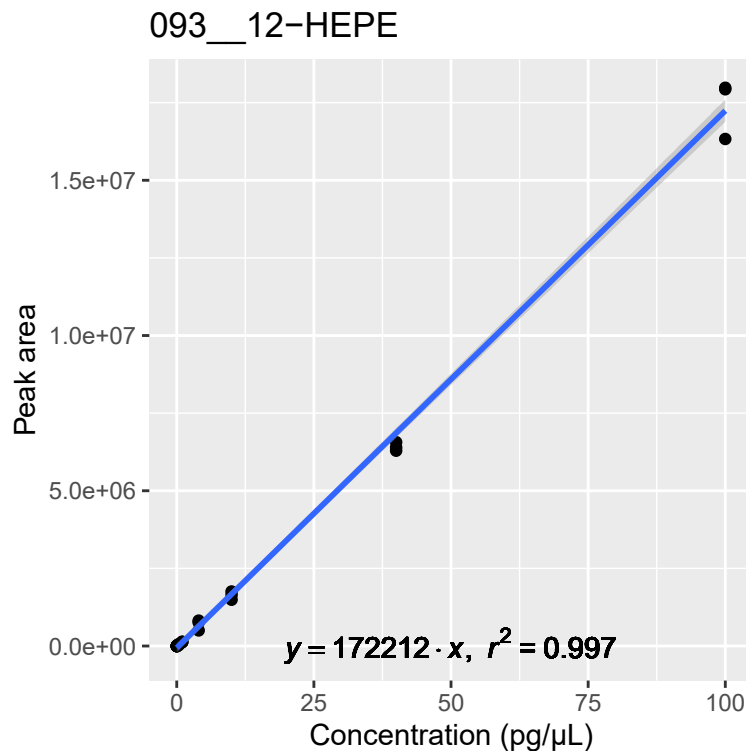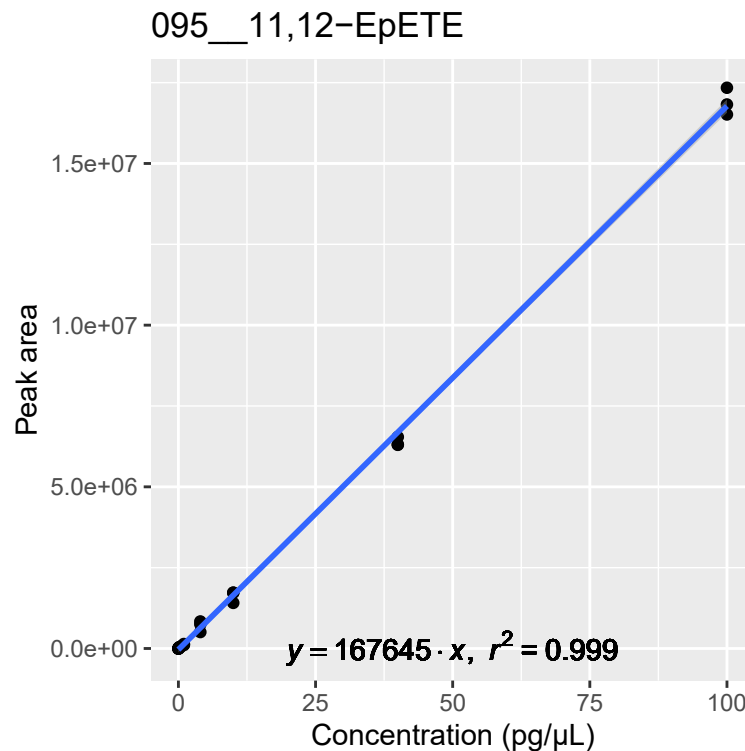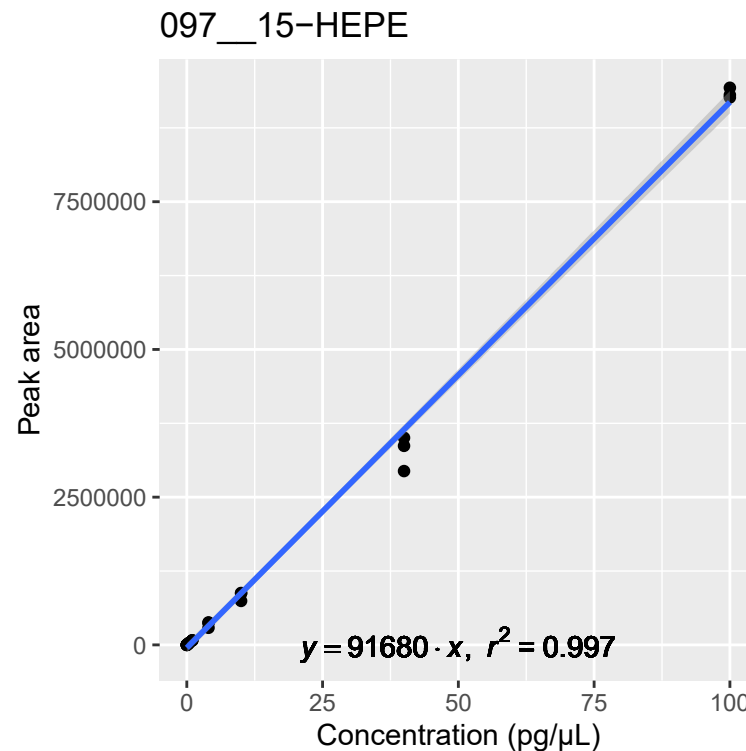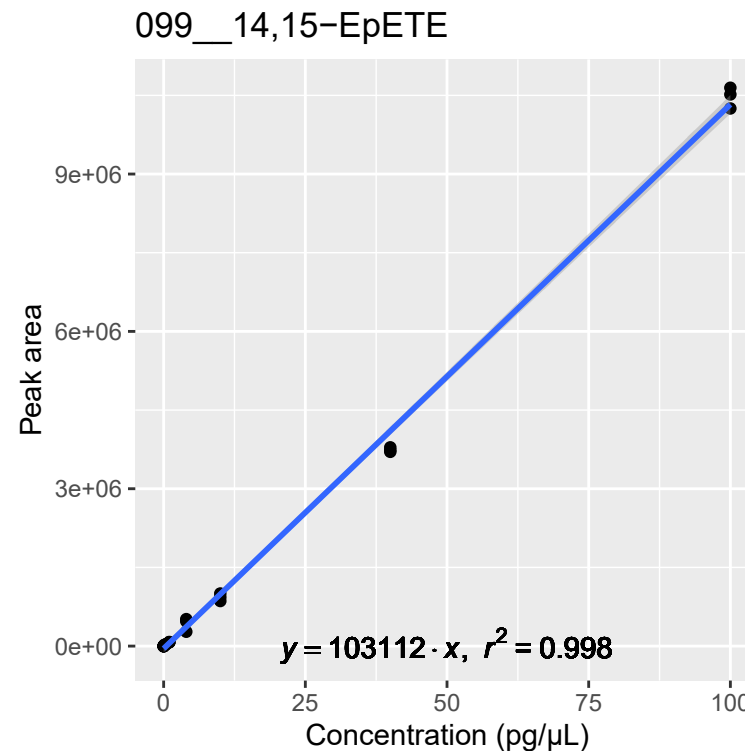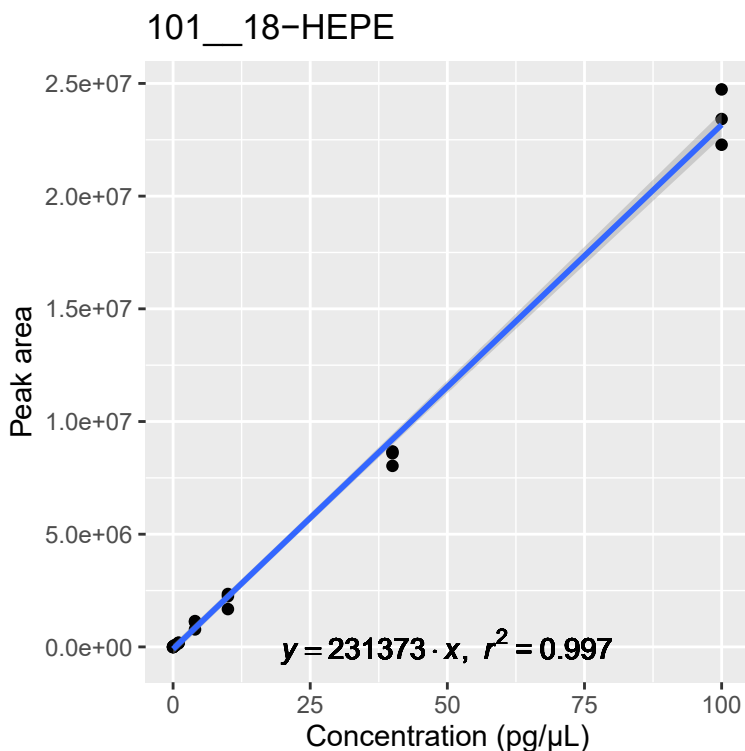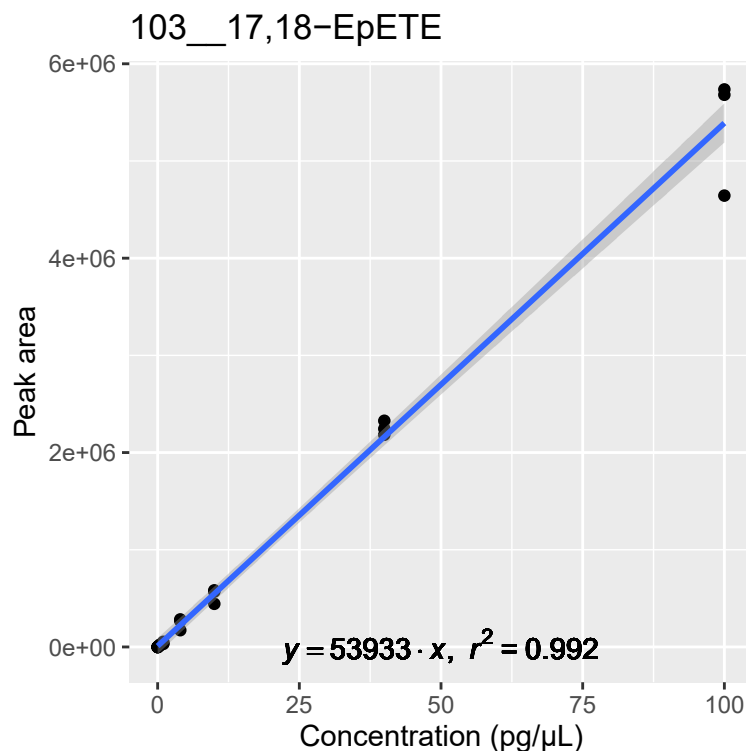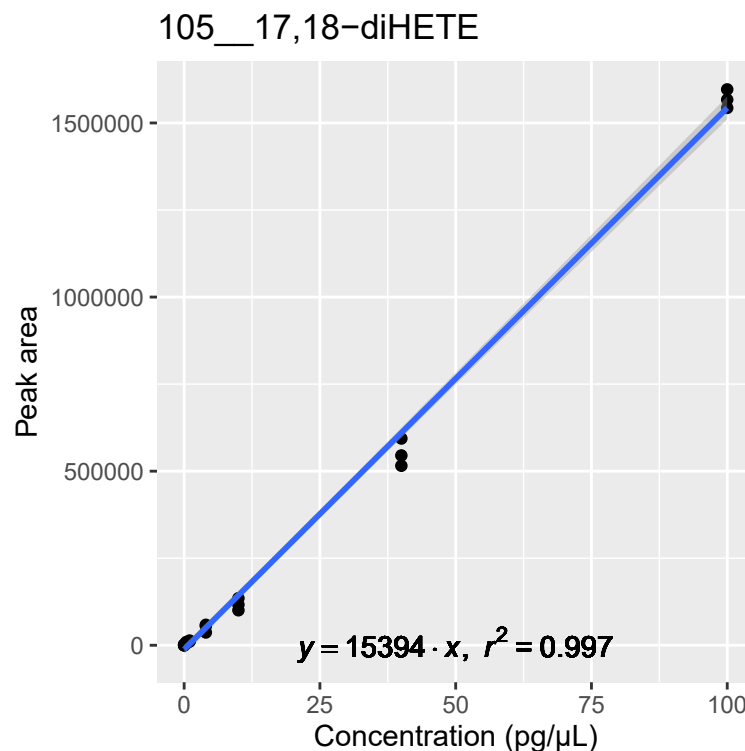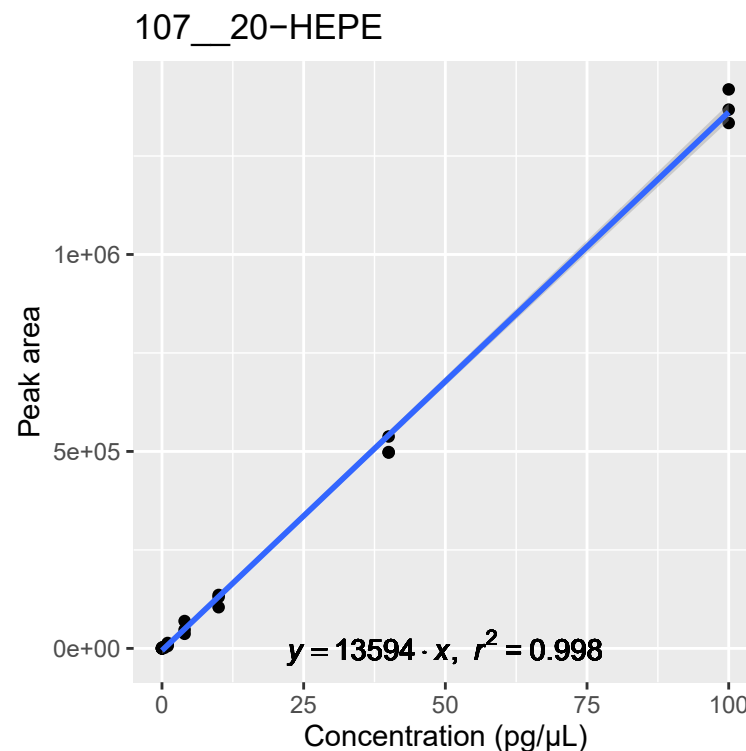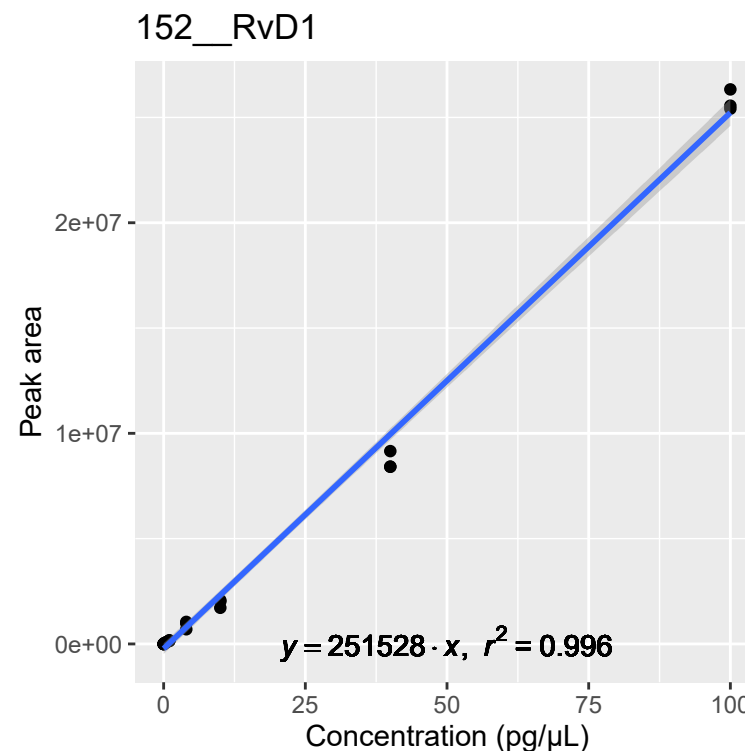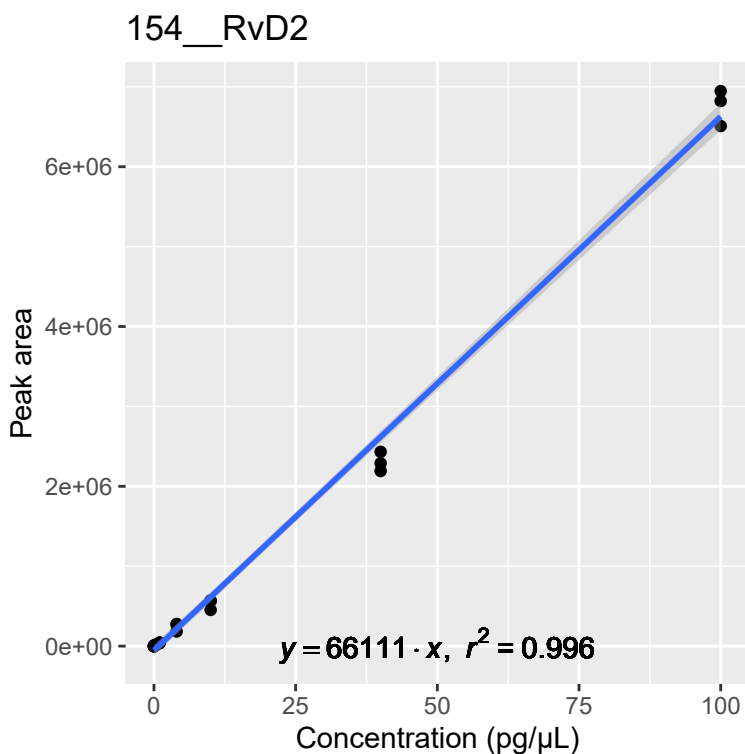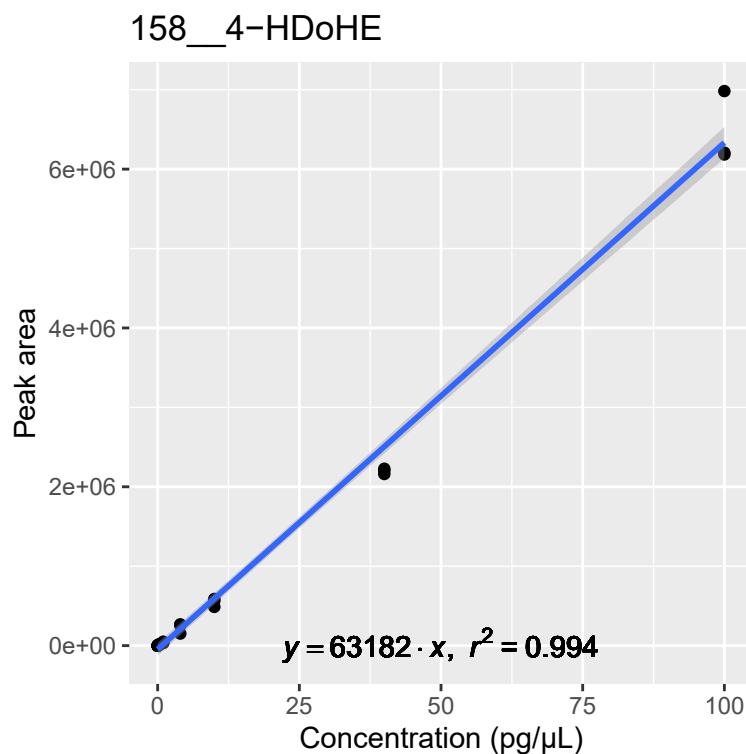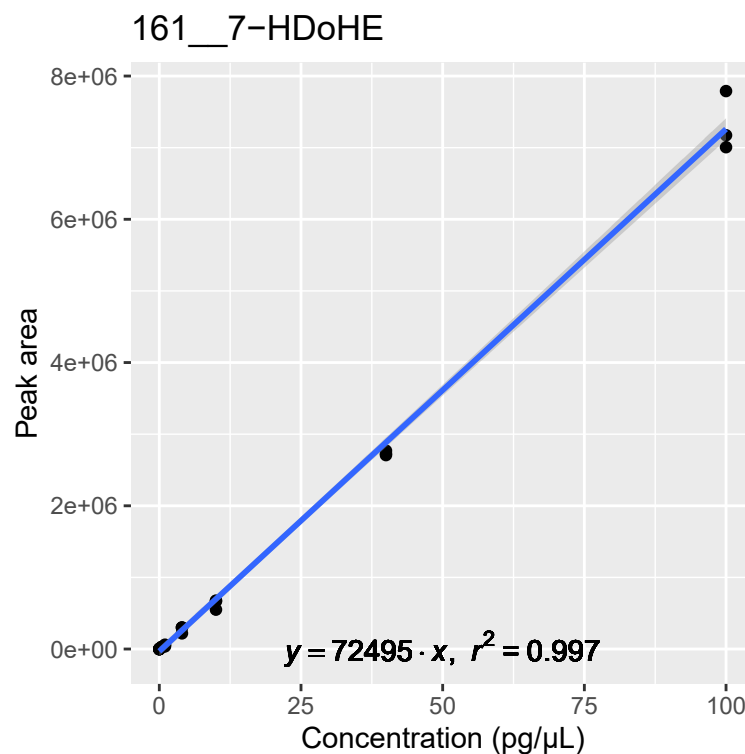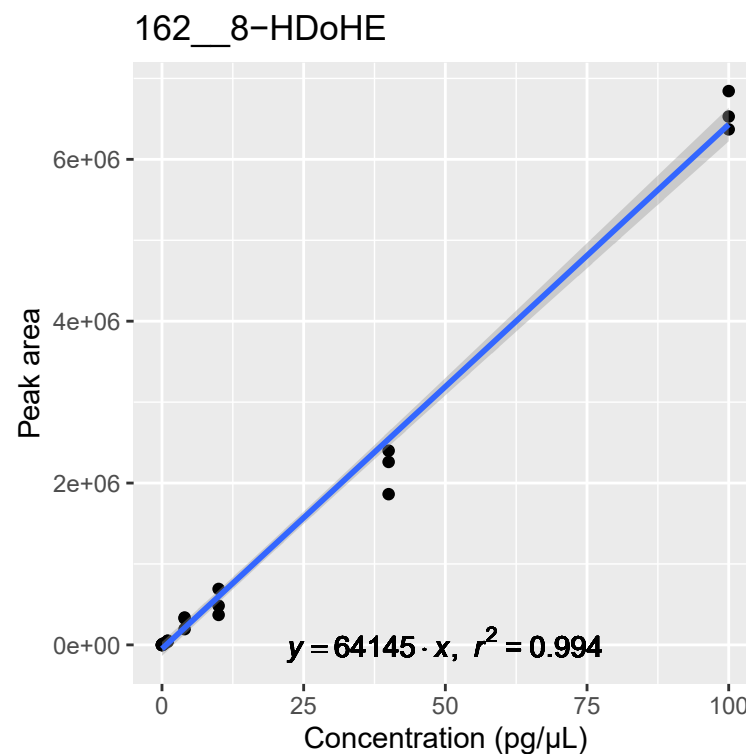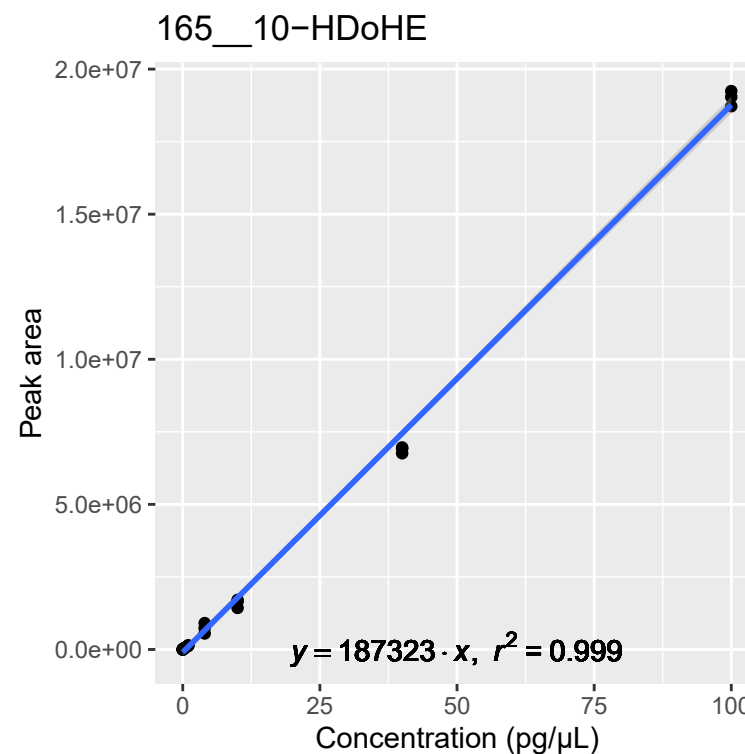

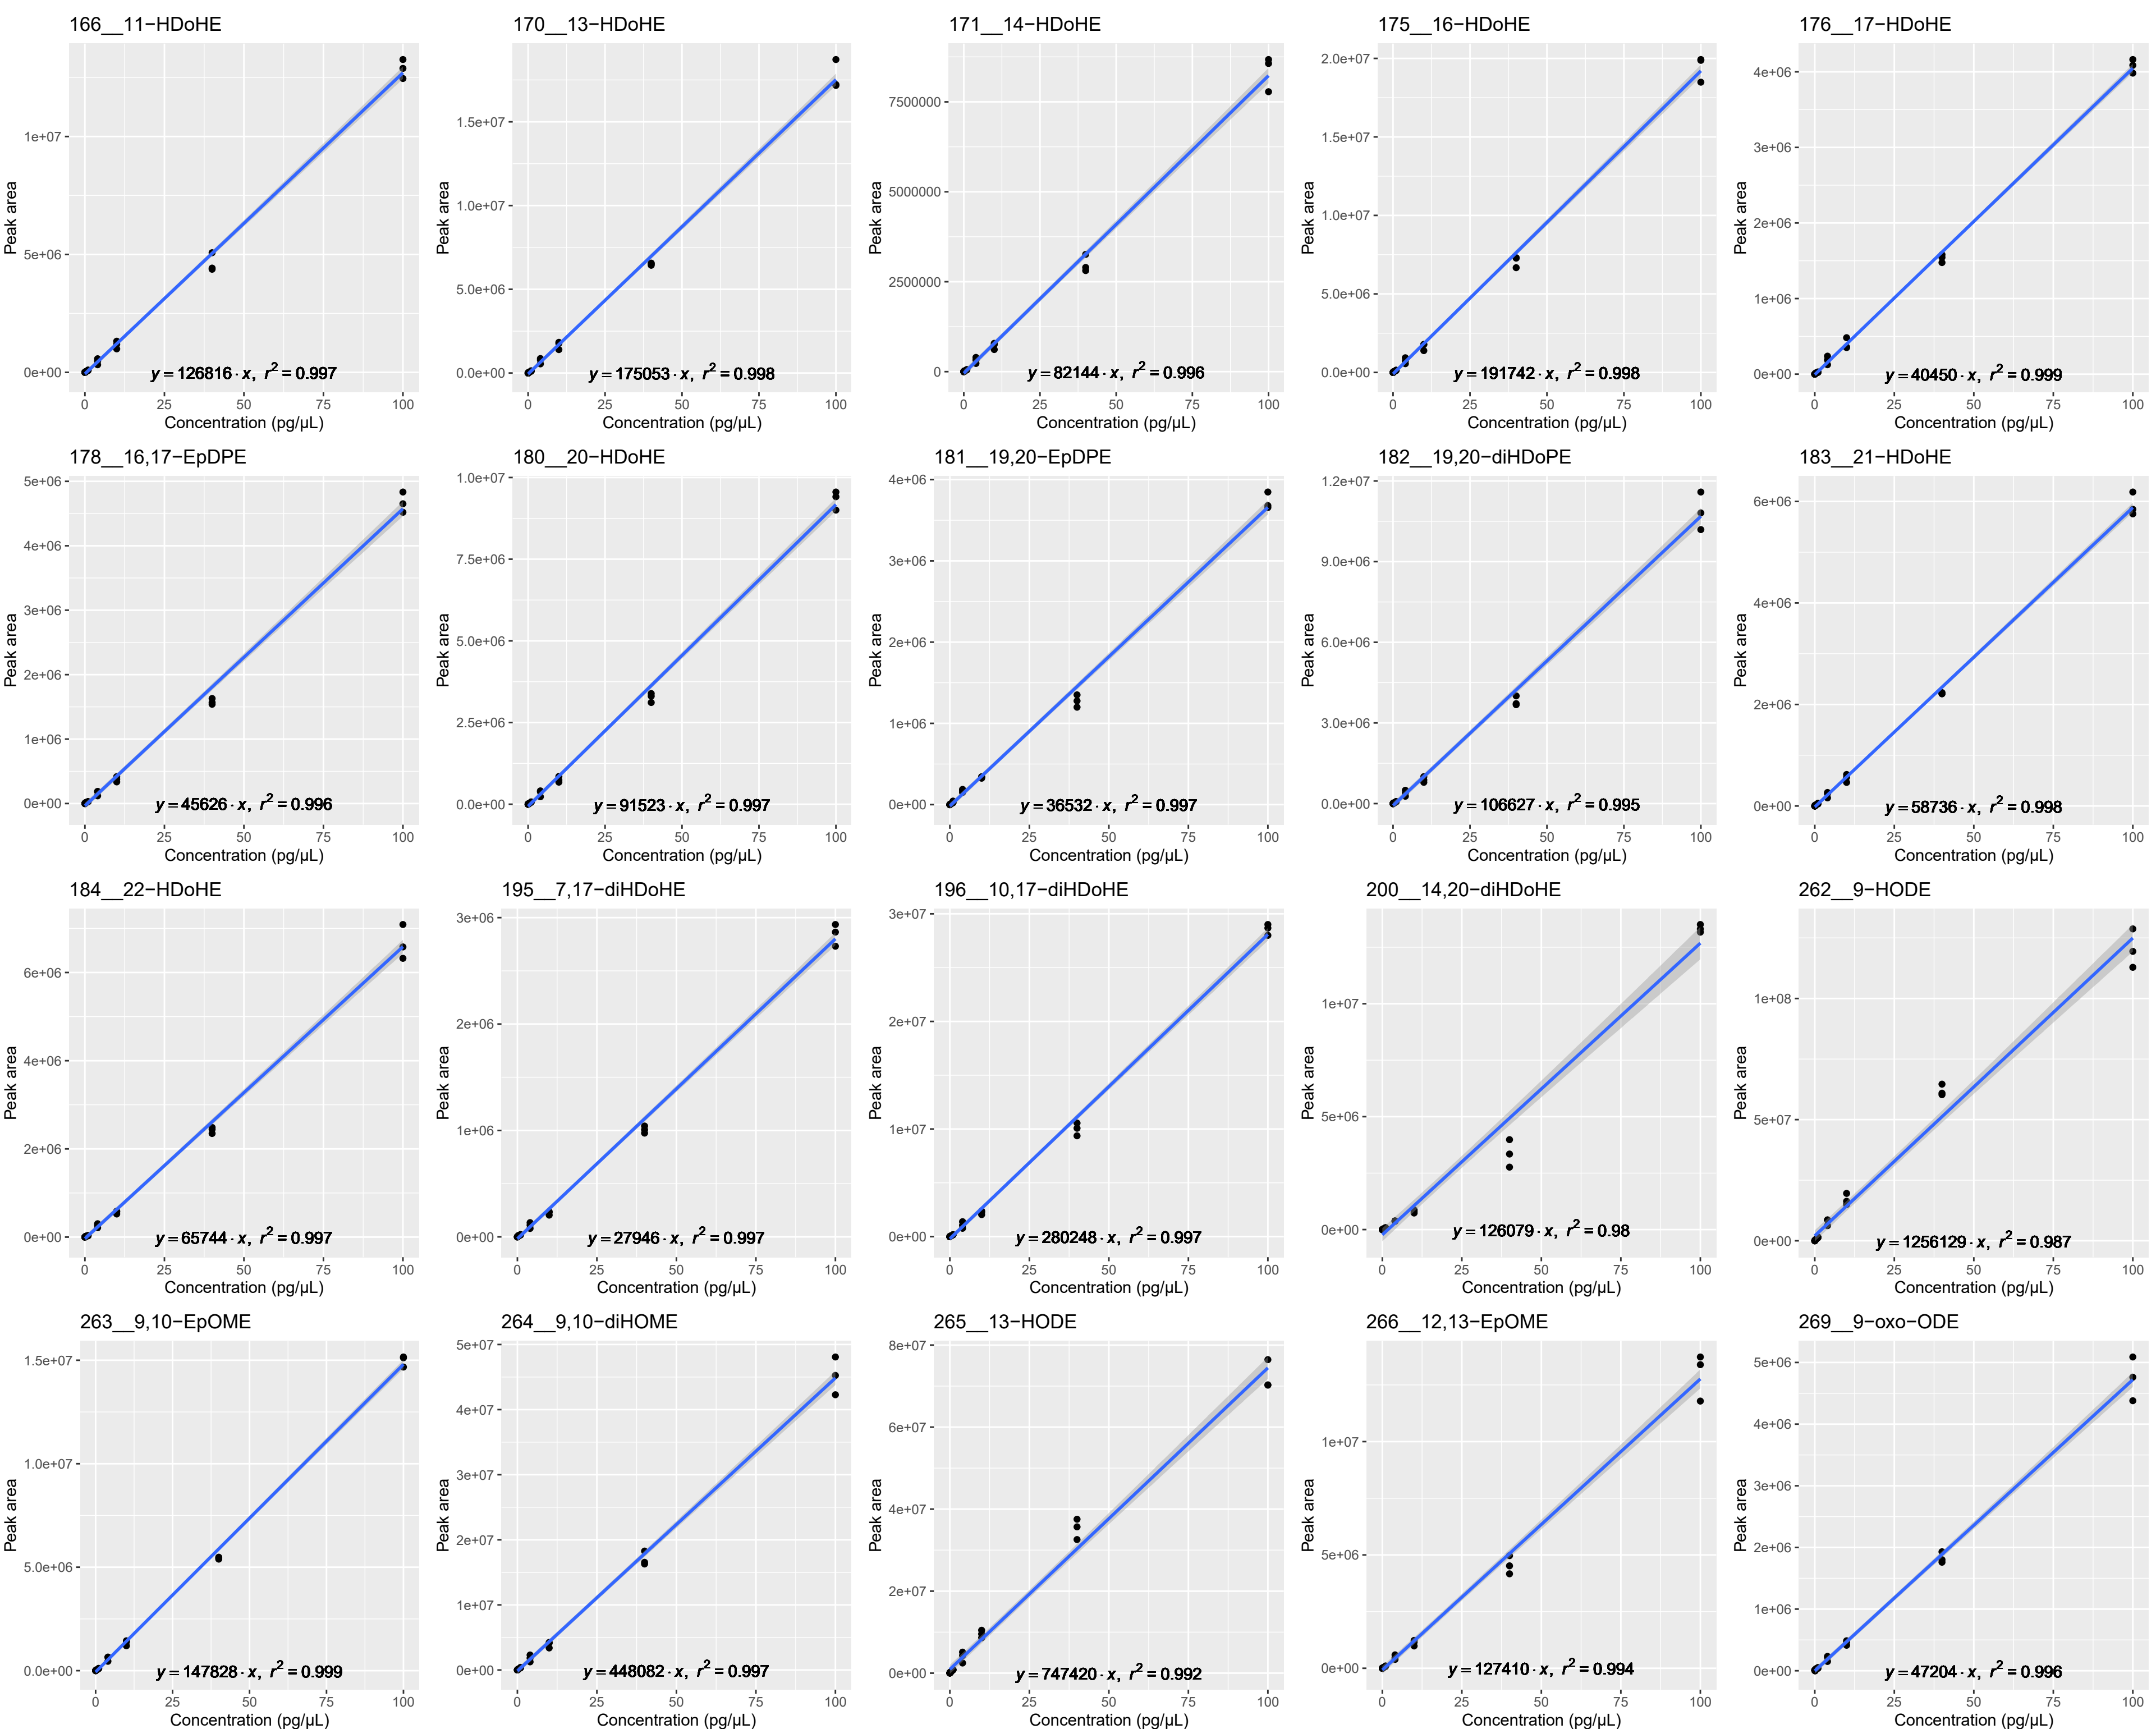



270\_\_13-oxo-ODE

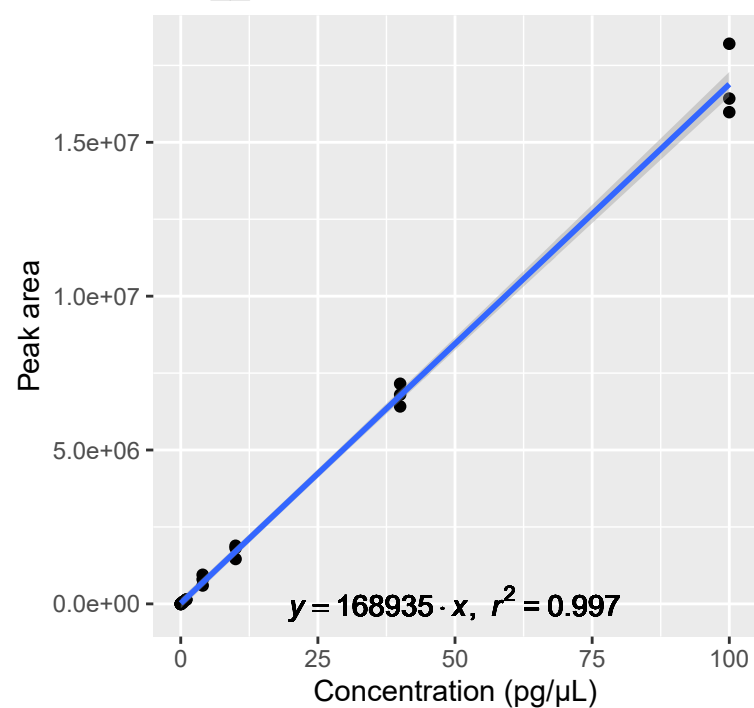

272\_\_9-HOTrE(n3)

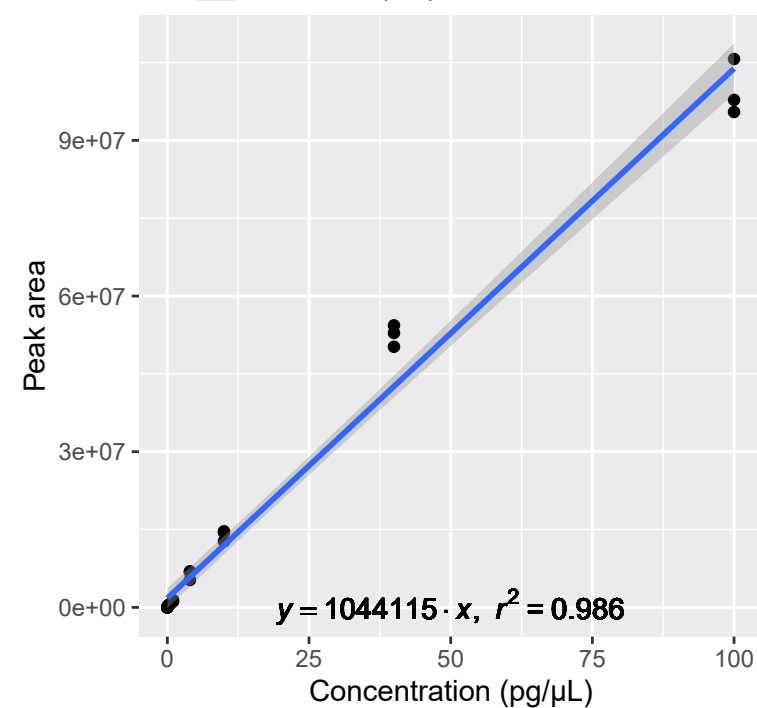

275\_\_13-HOTrE(n3)

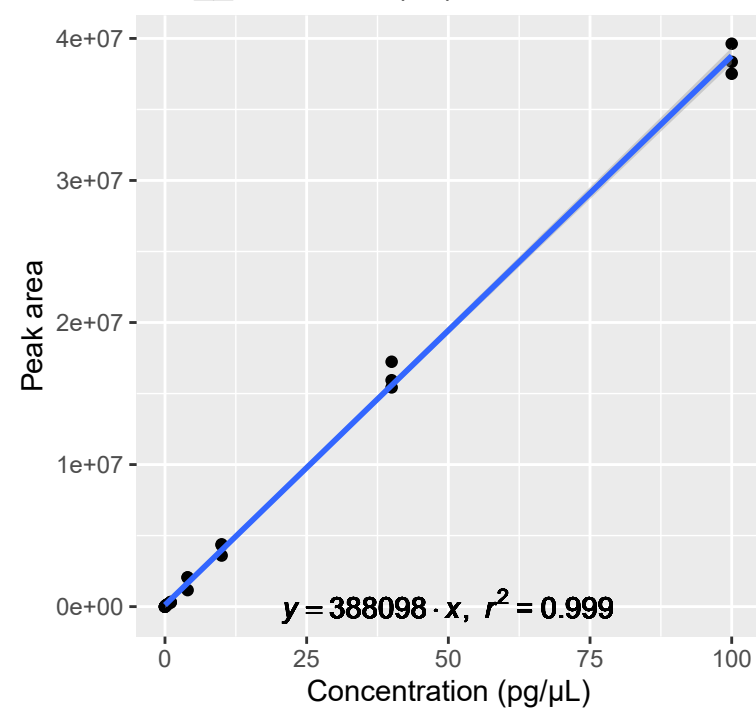

281\_\_9-oxo-OTrE(n3)

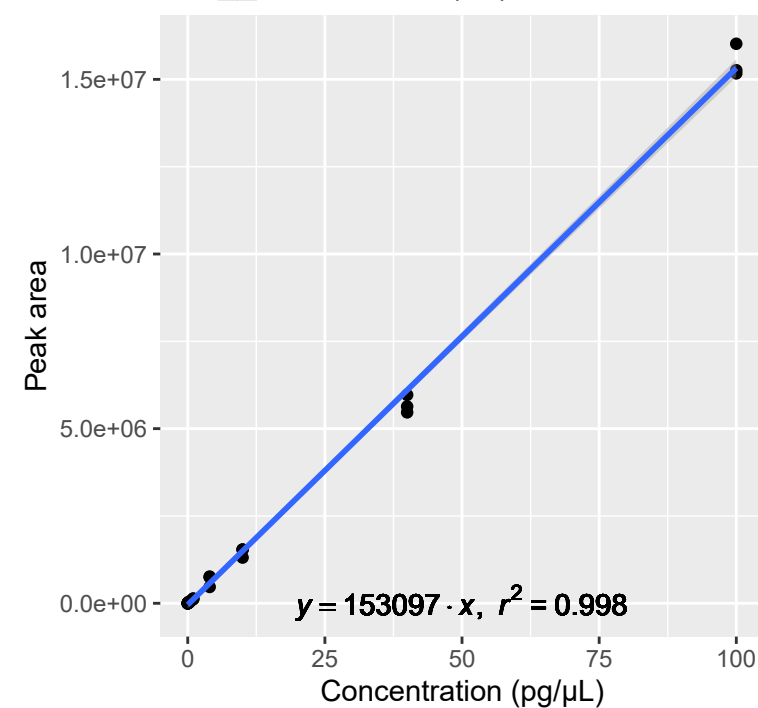

290\_\_13-HOTrE(n6)

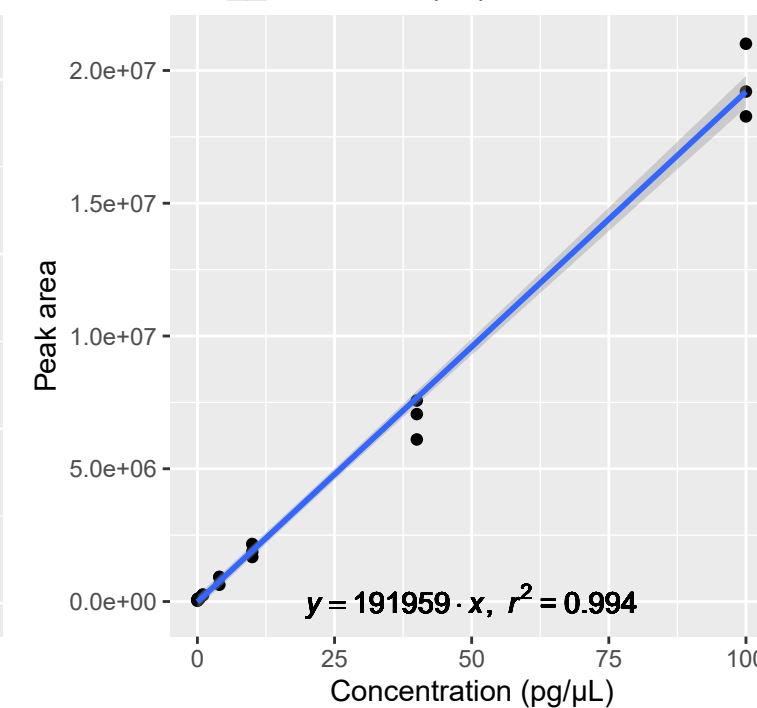

303\_\_PGE1

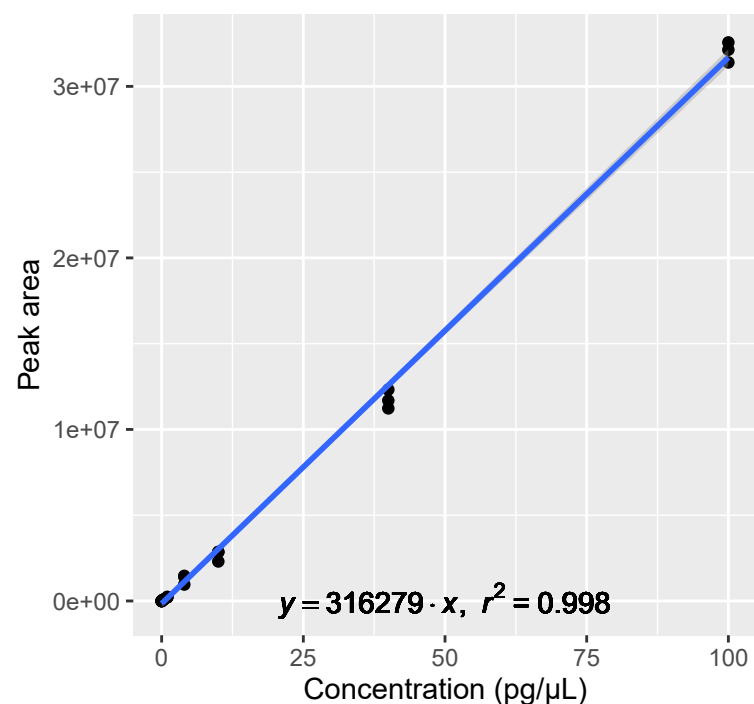

304\_\_PGD1

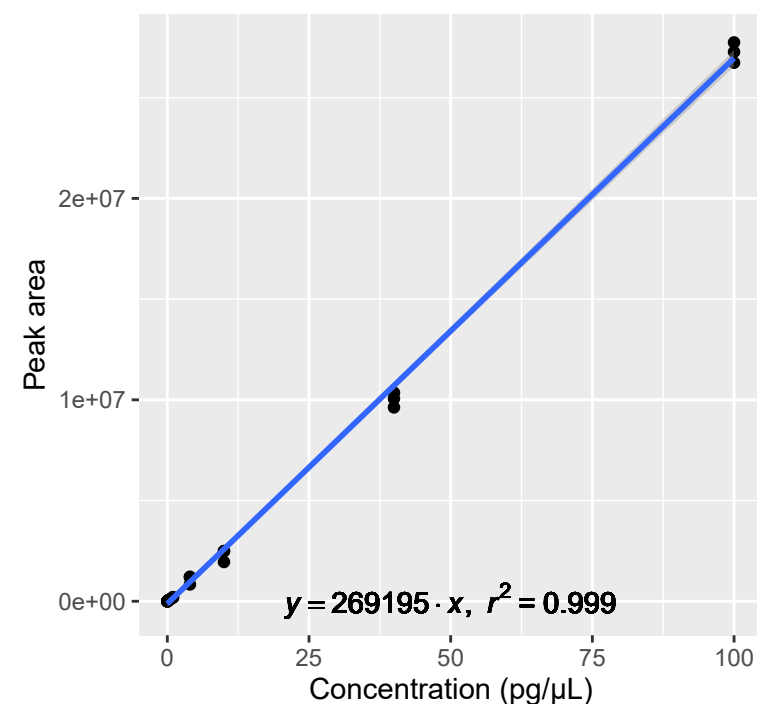

306\_\_TXB1

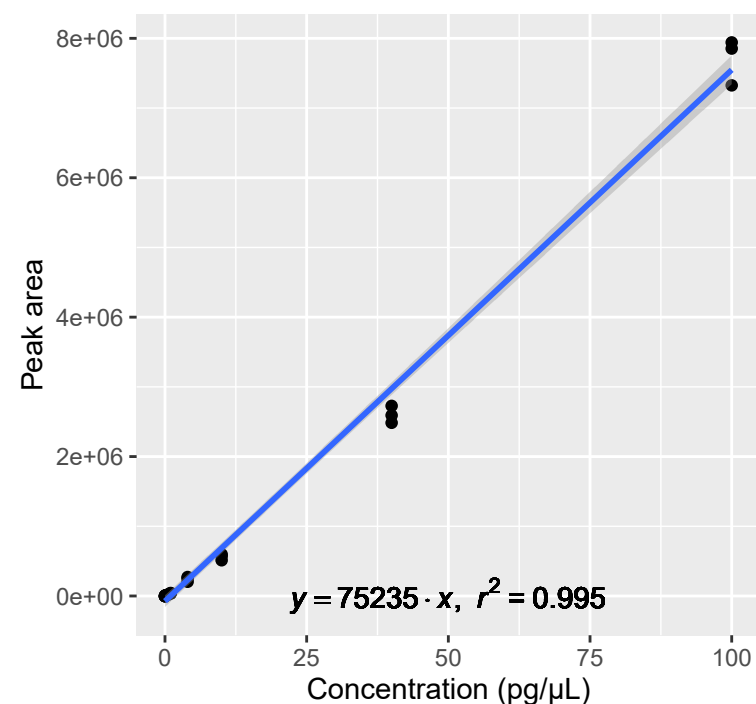

308\_\_8-HETrE(n6)

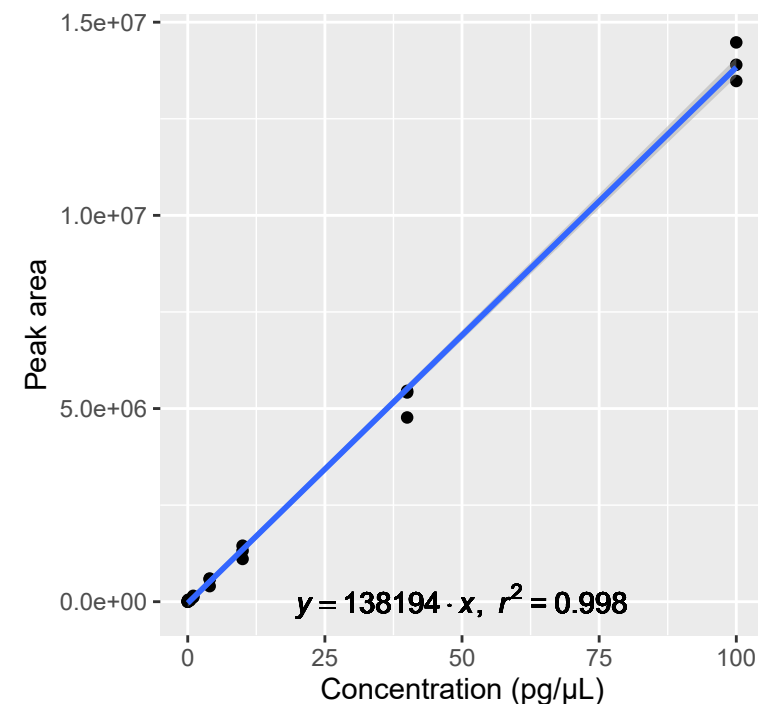

314\_\_15-HETrE(n6)

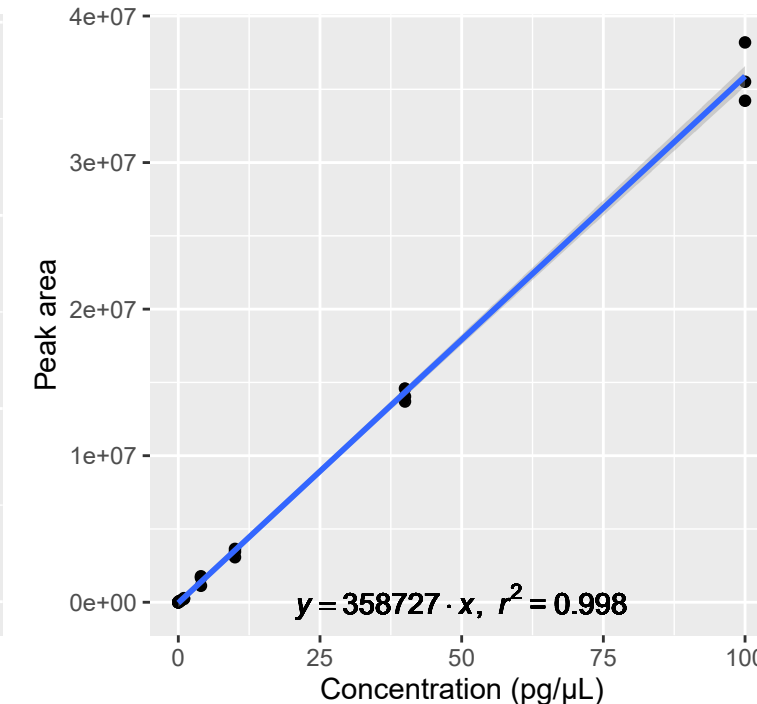

318\_\_LTB3

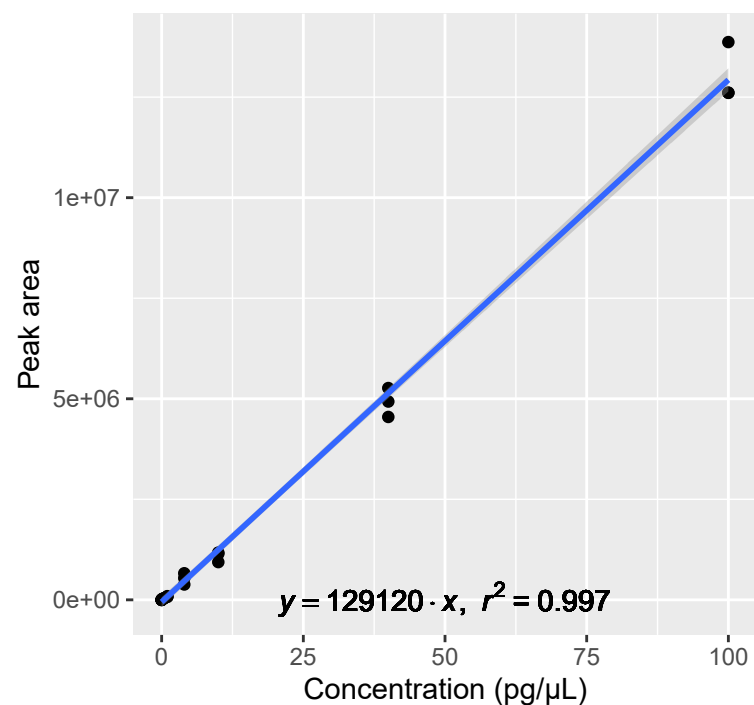

319\_\_5-HETrE(n9)

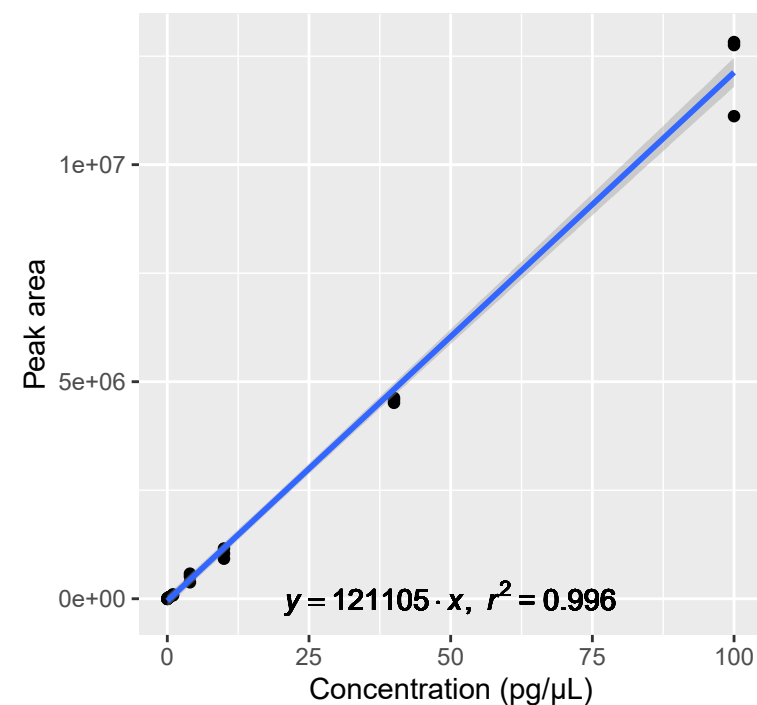

029\_\_5,6-EET

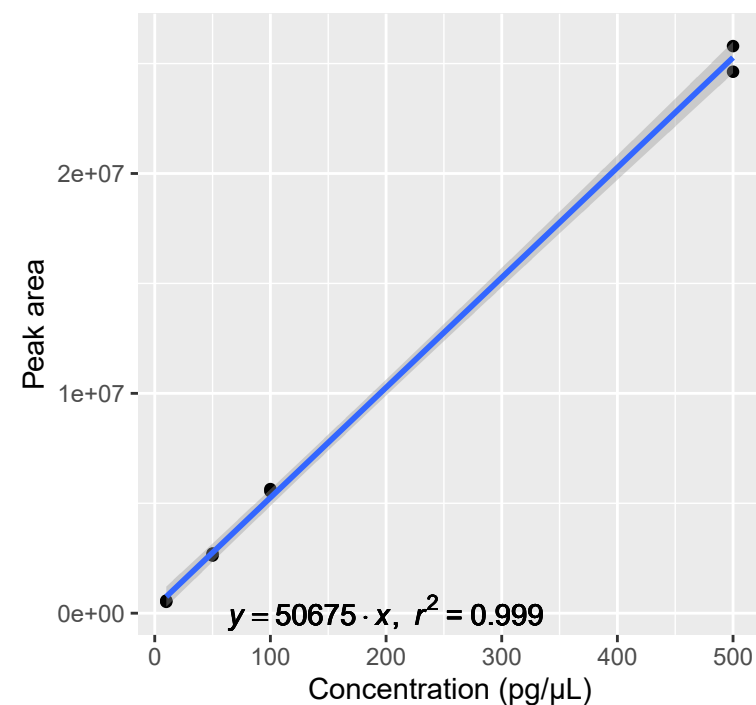

030\_\_5,6-DHT

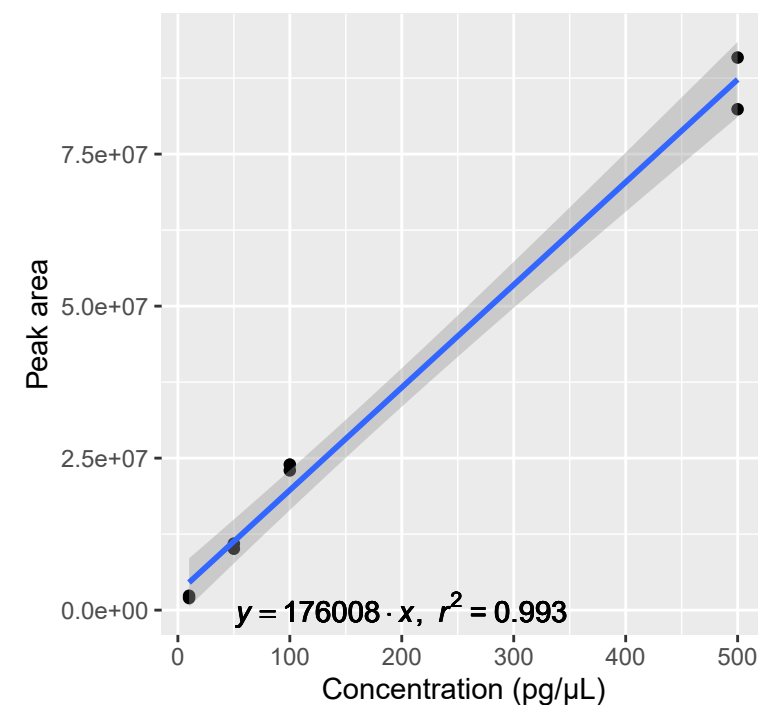

033\_\_8,9-EET

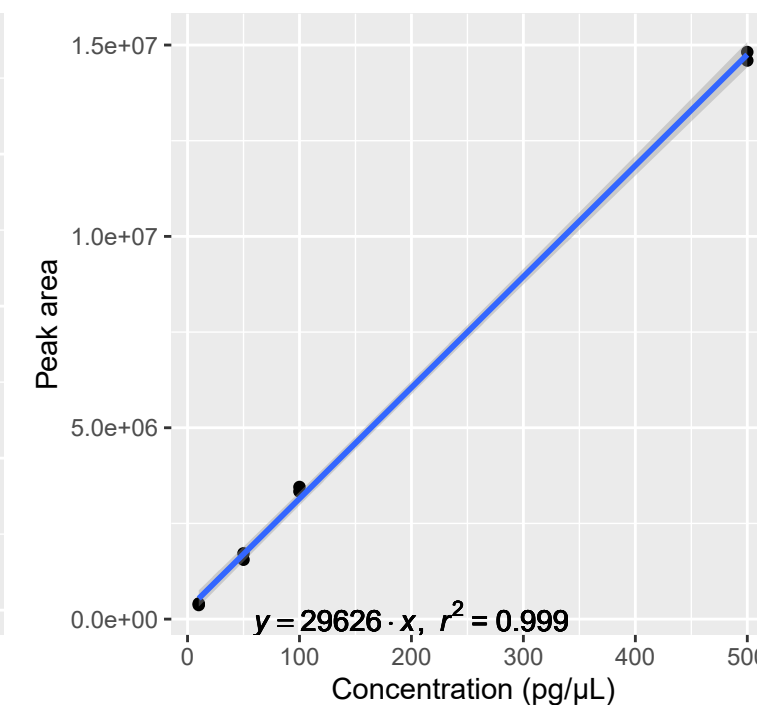

034\_\_8,9-DHT

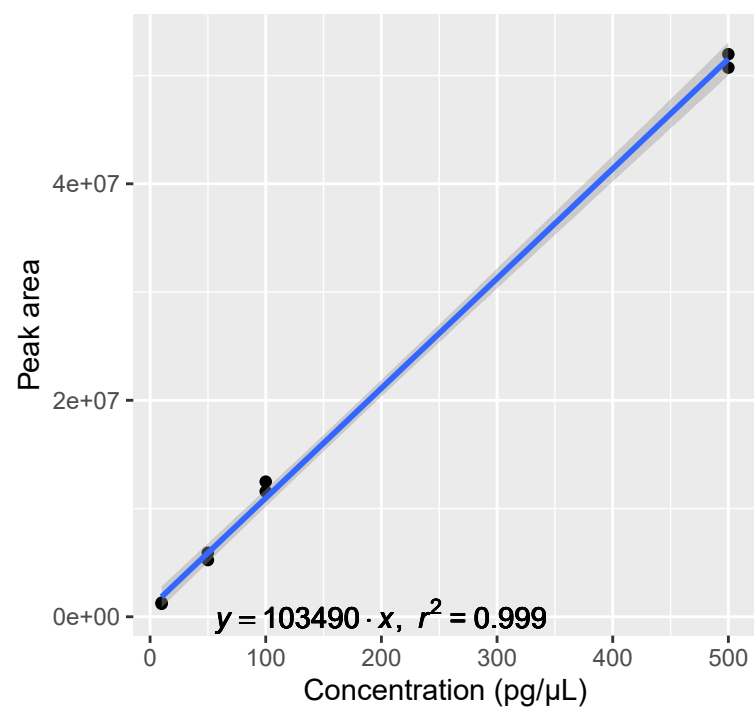

355\_\_16:0 Palmitic Acid

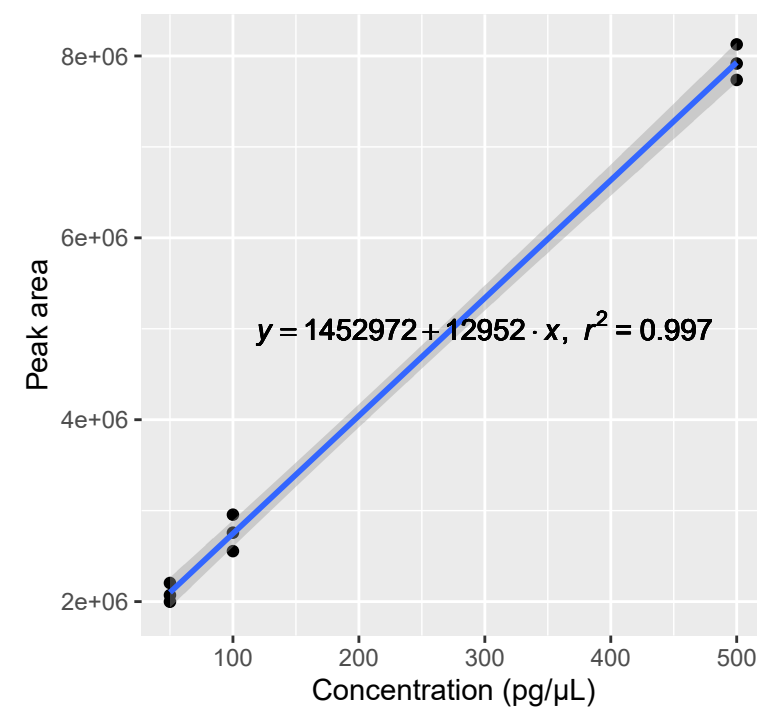

357\_\_18:0 Stearic Acid

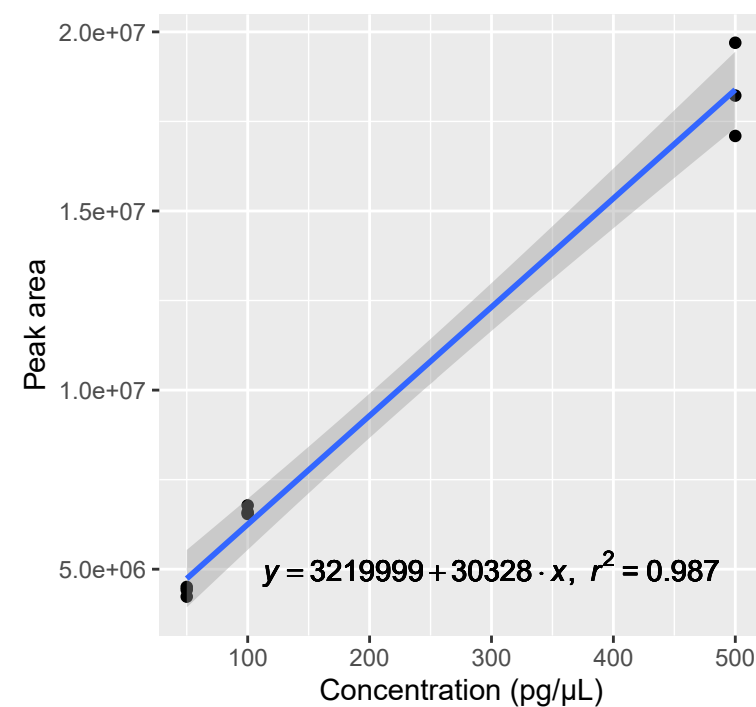

356\_\_16:1 Palmitoleic Acid

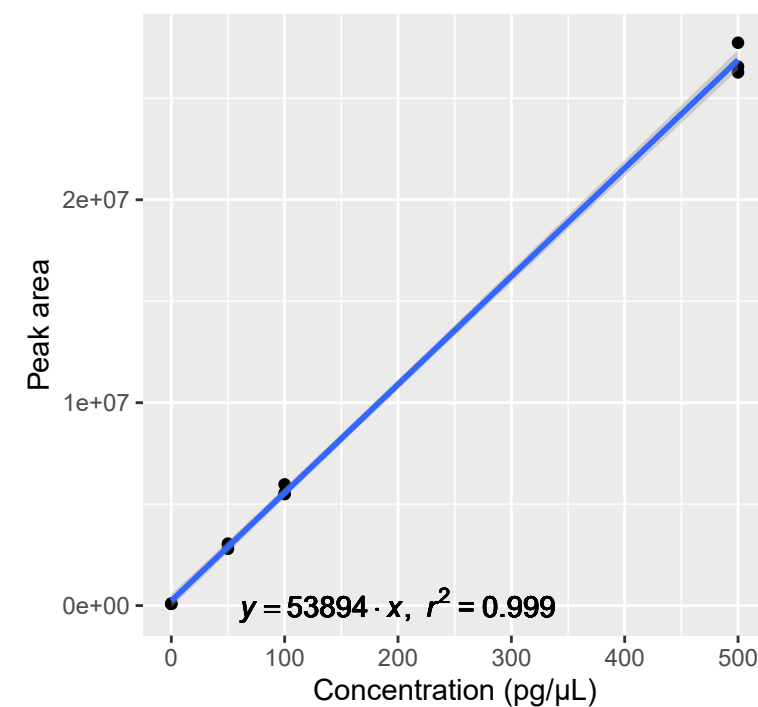

358\_\_18:1 Oleic Acid(n9)

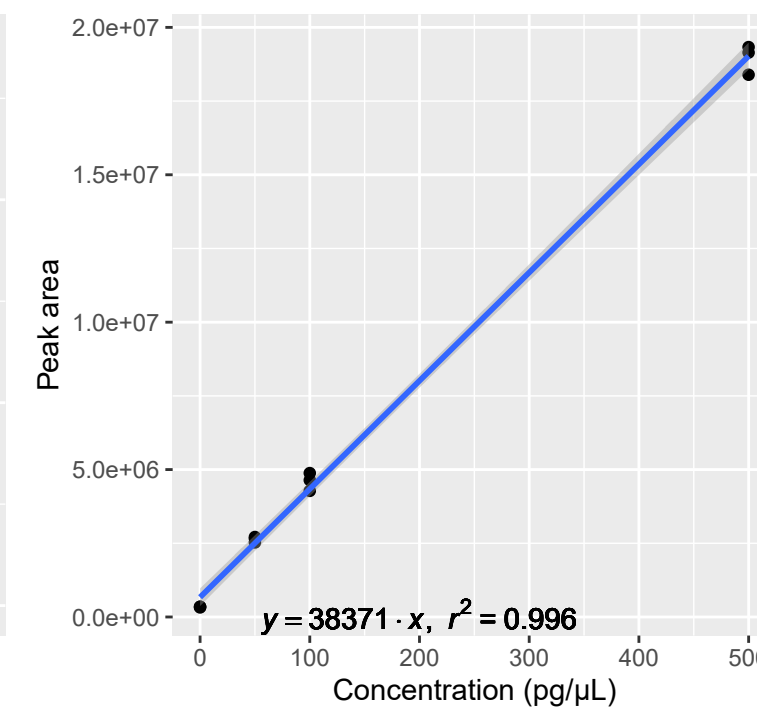

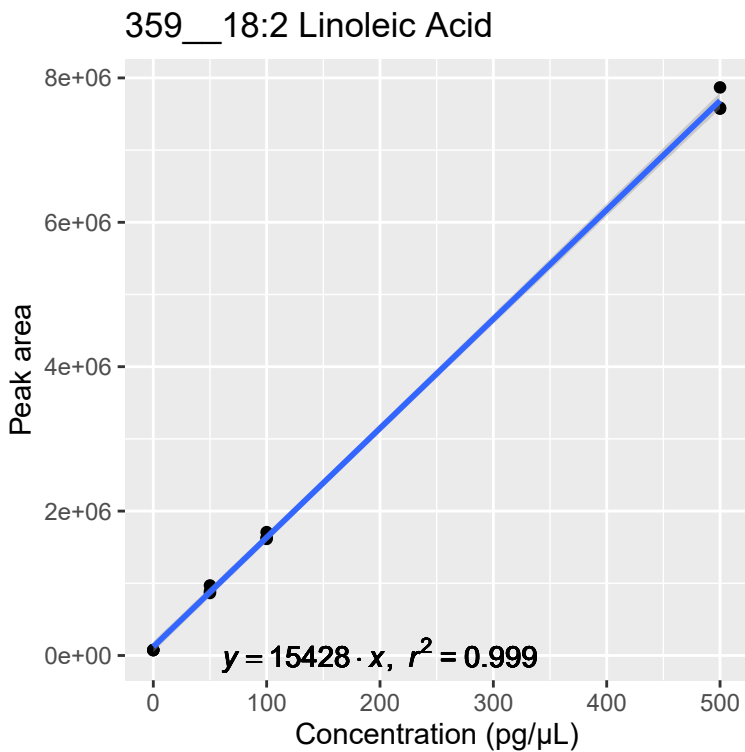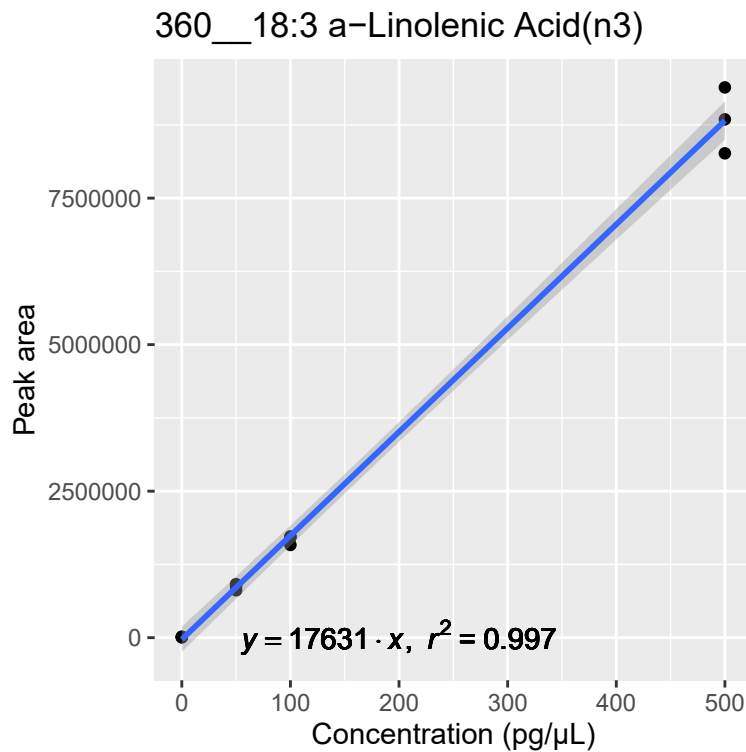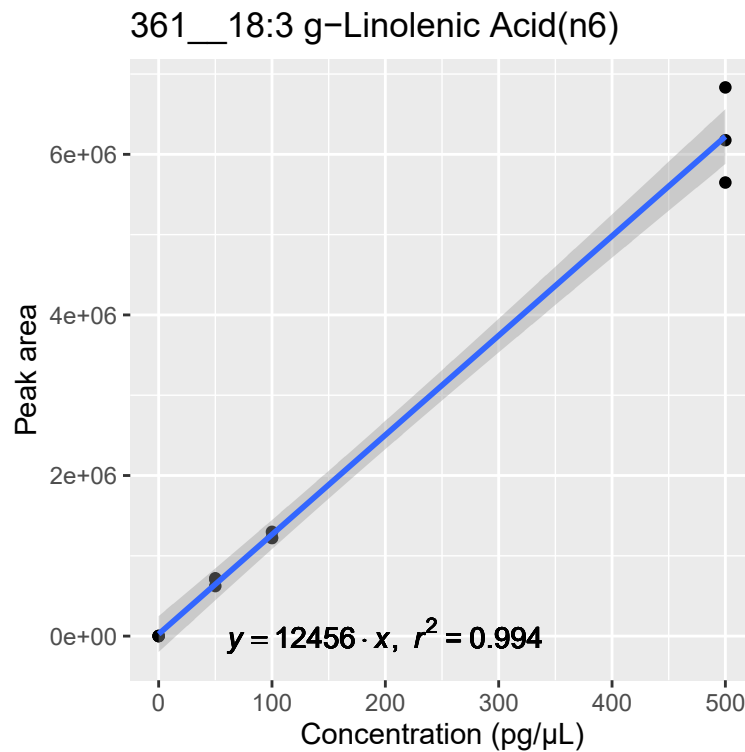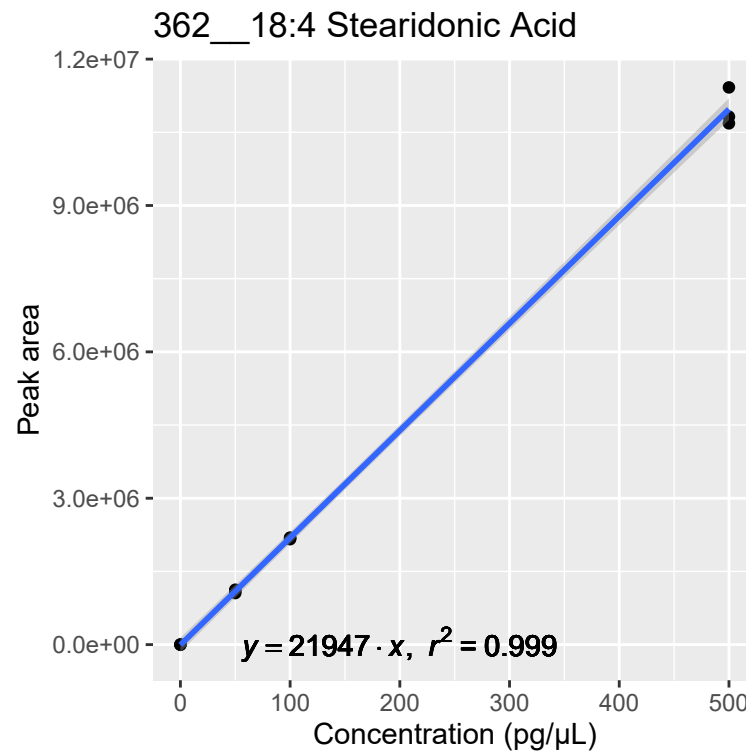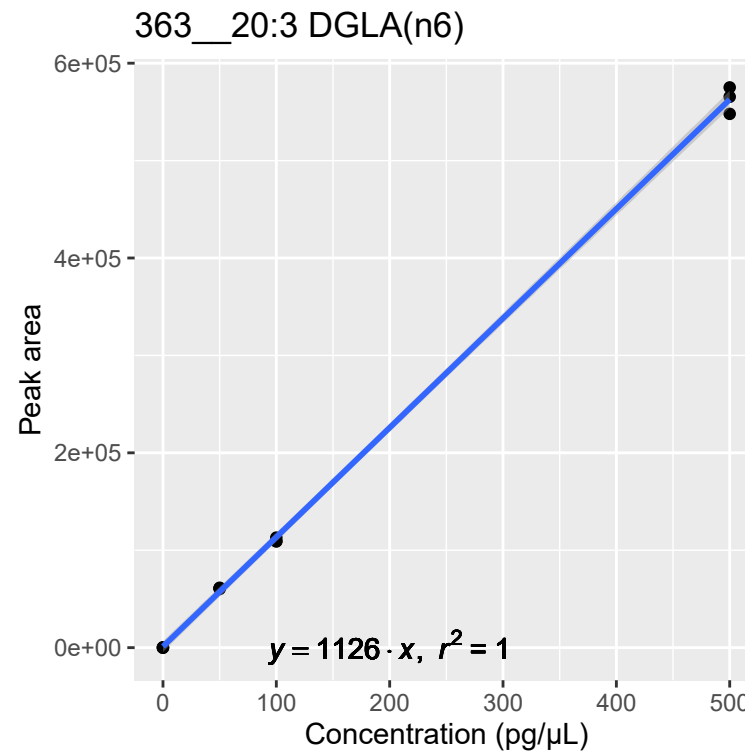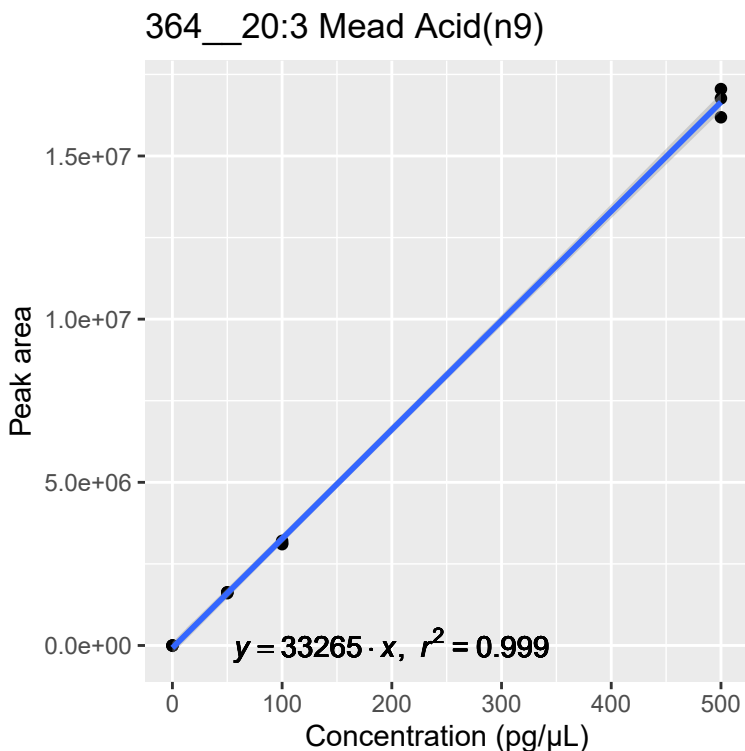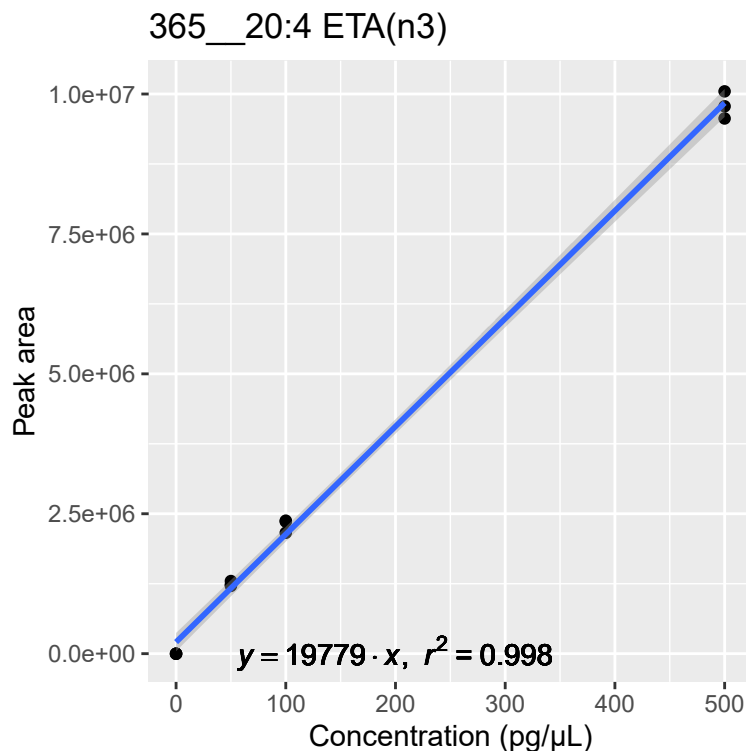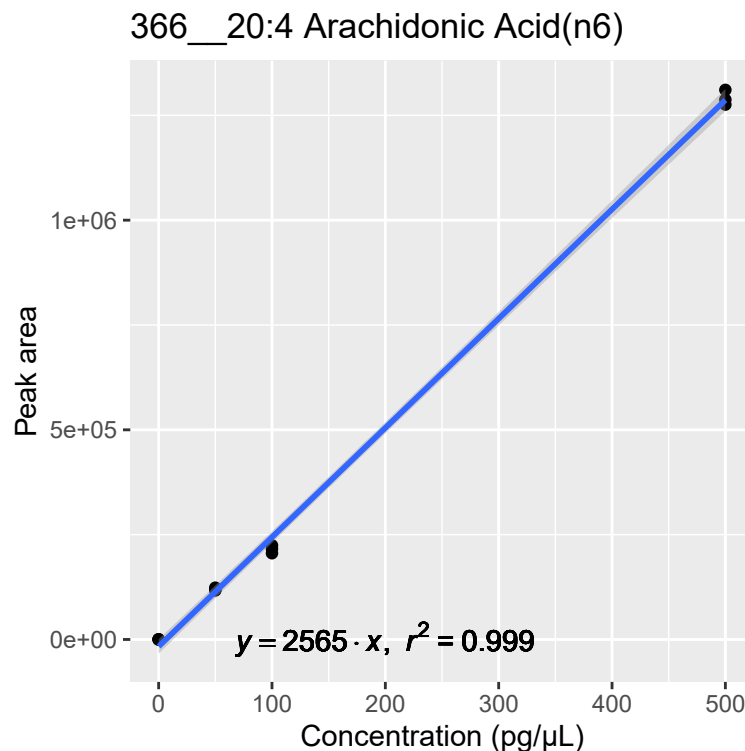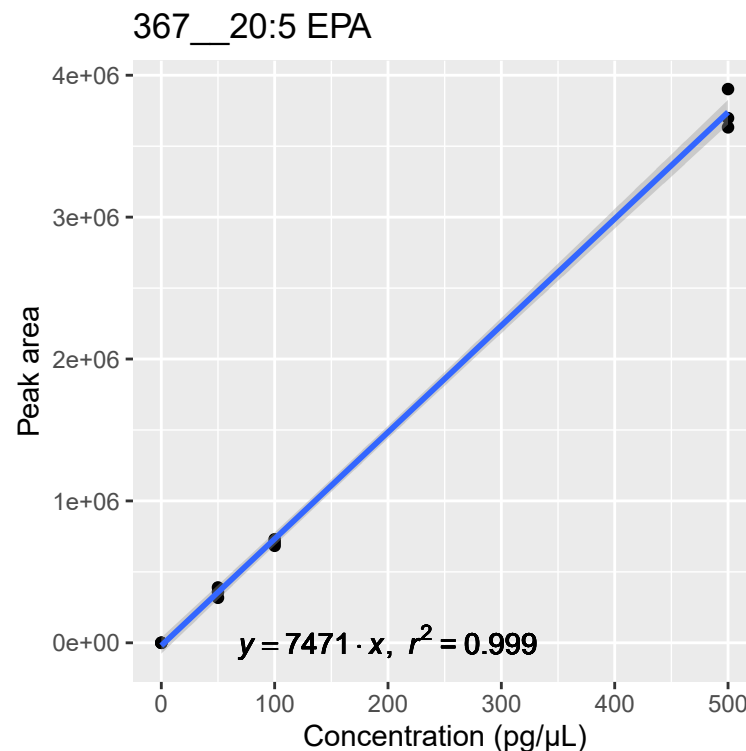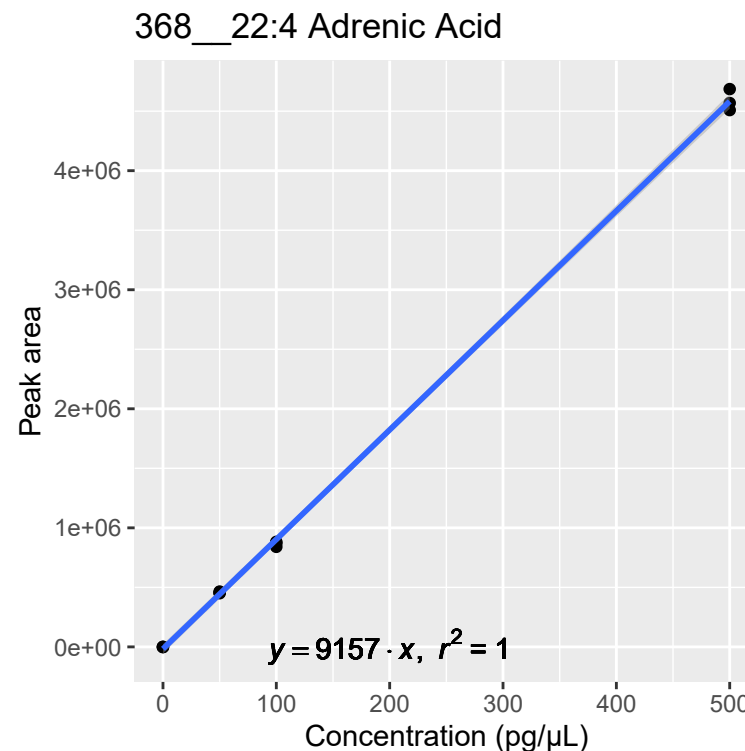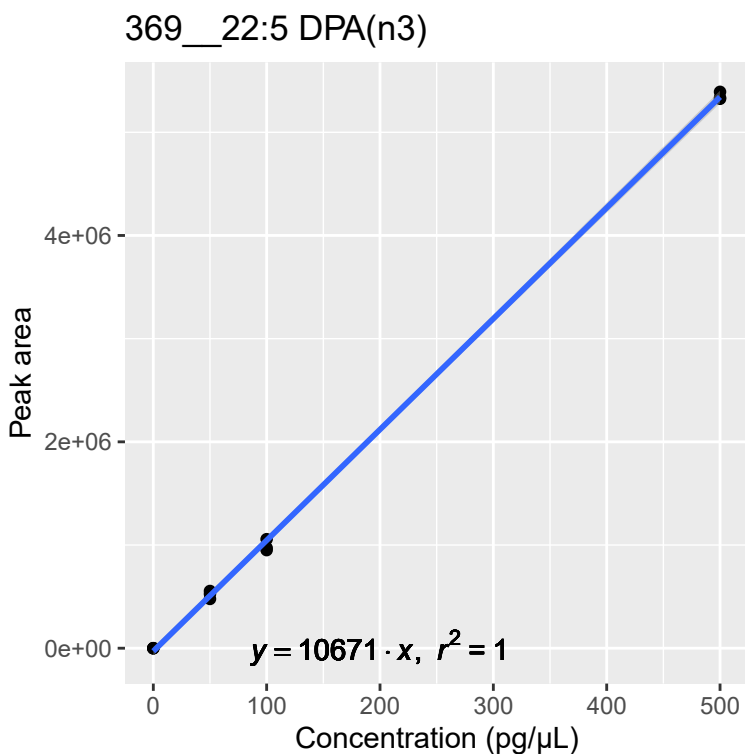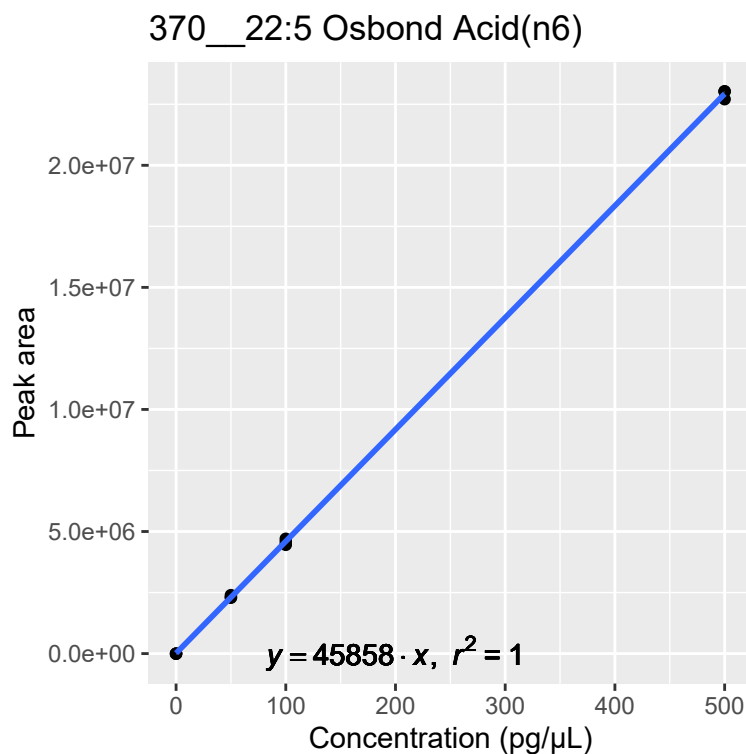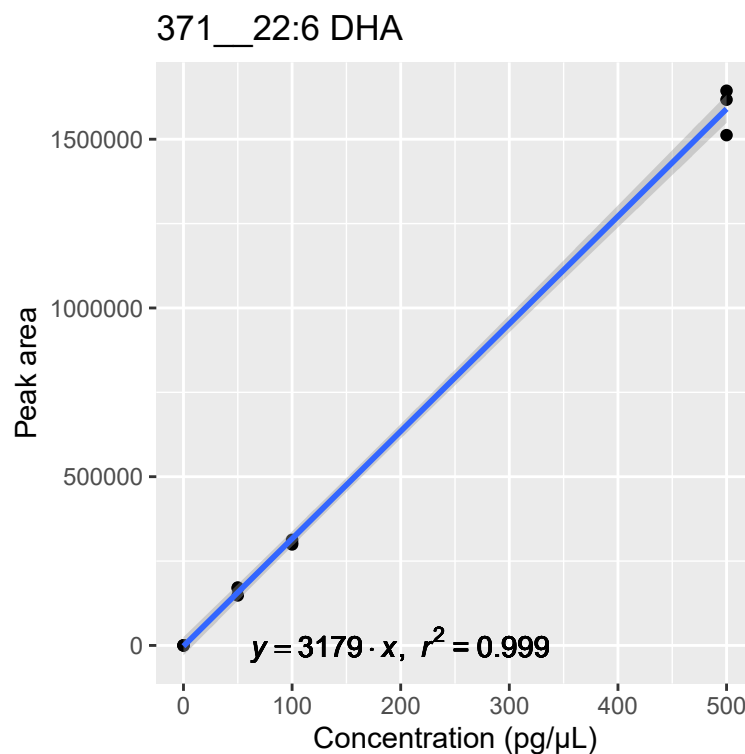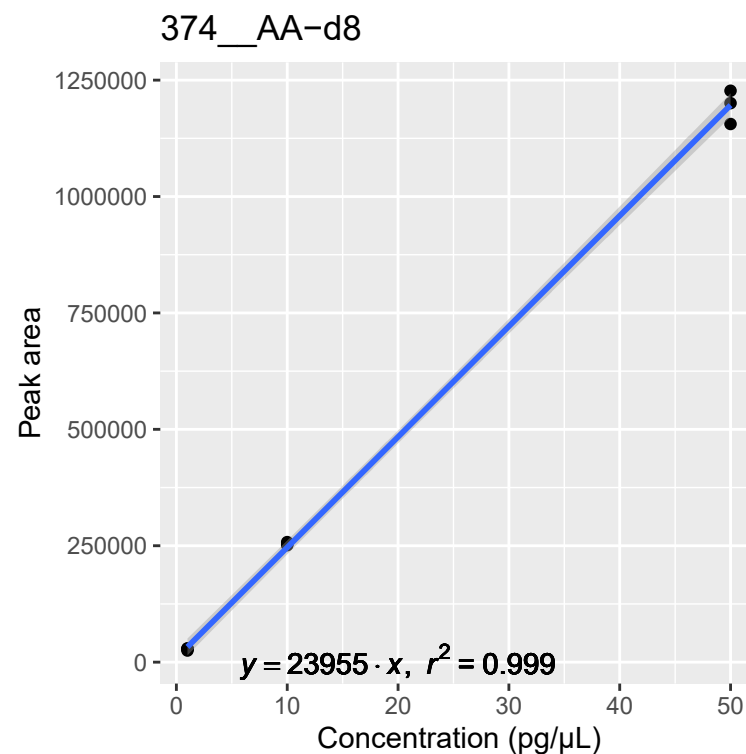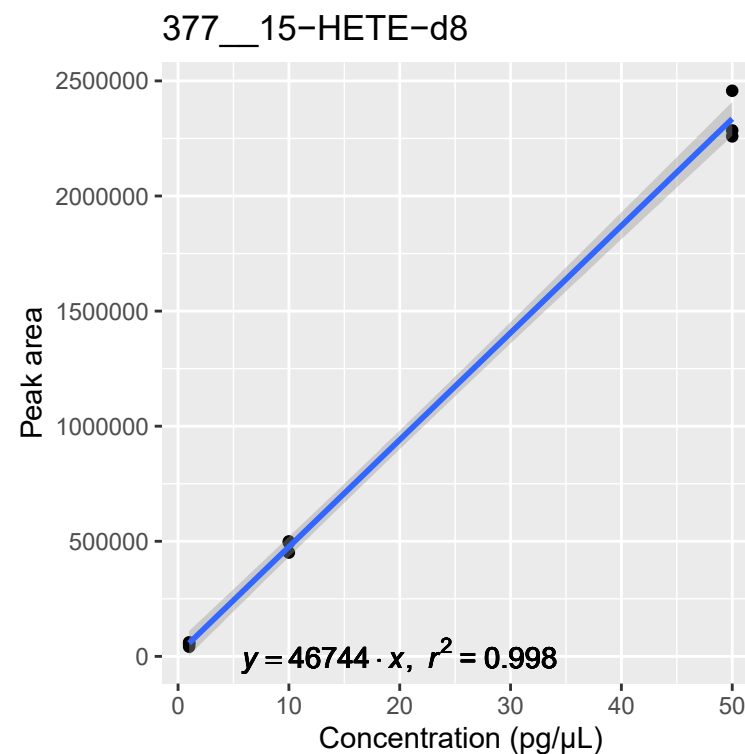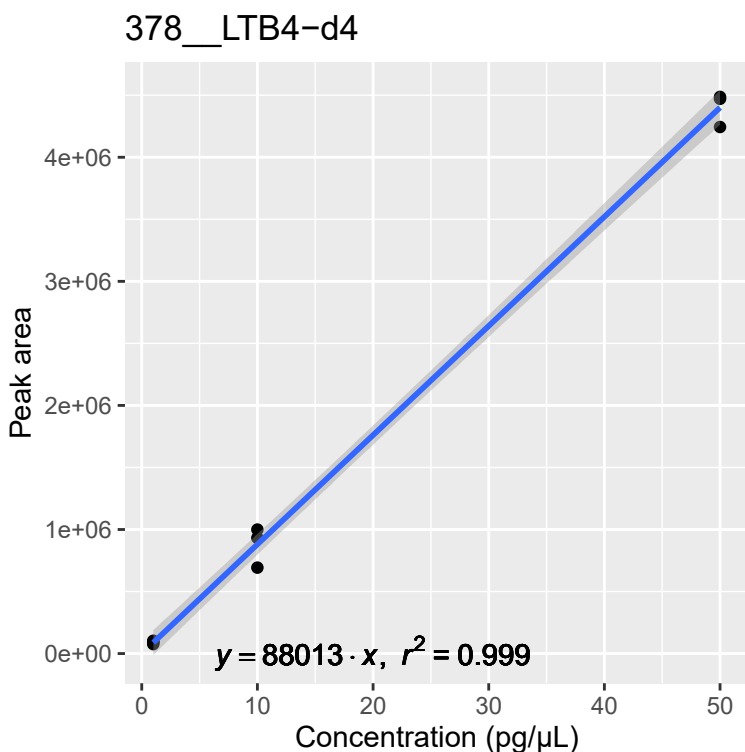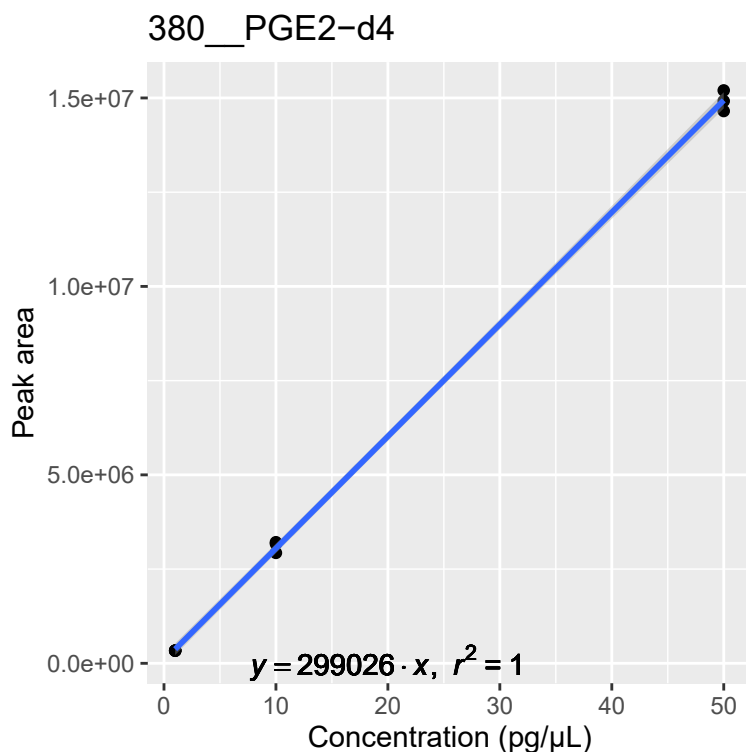

Supplement: s1 [file s1]
