# Supplementary material for: Characterization of Lipid Profiles after Dietary Intake of Polyunsaturated Fatty Acids Using Integrated Untargeted and Targeted Lipidomics
Source: MDPI journal article supplement (doi:10.3390/metabo9100241), 2019-10-21

Untargeted: Liver PC1 loading plot for Top20 from max/min values

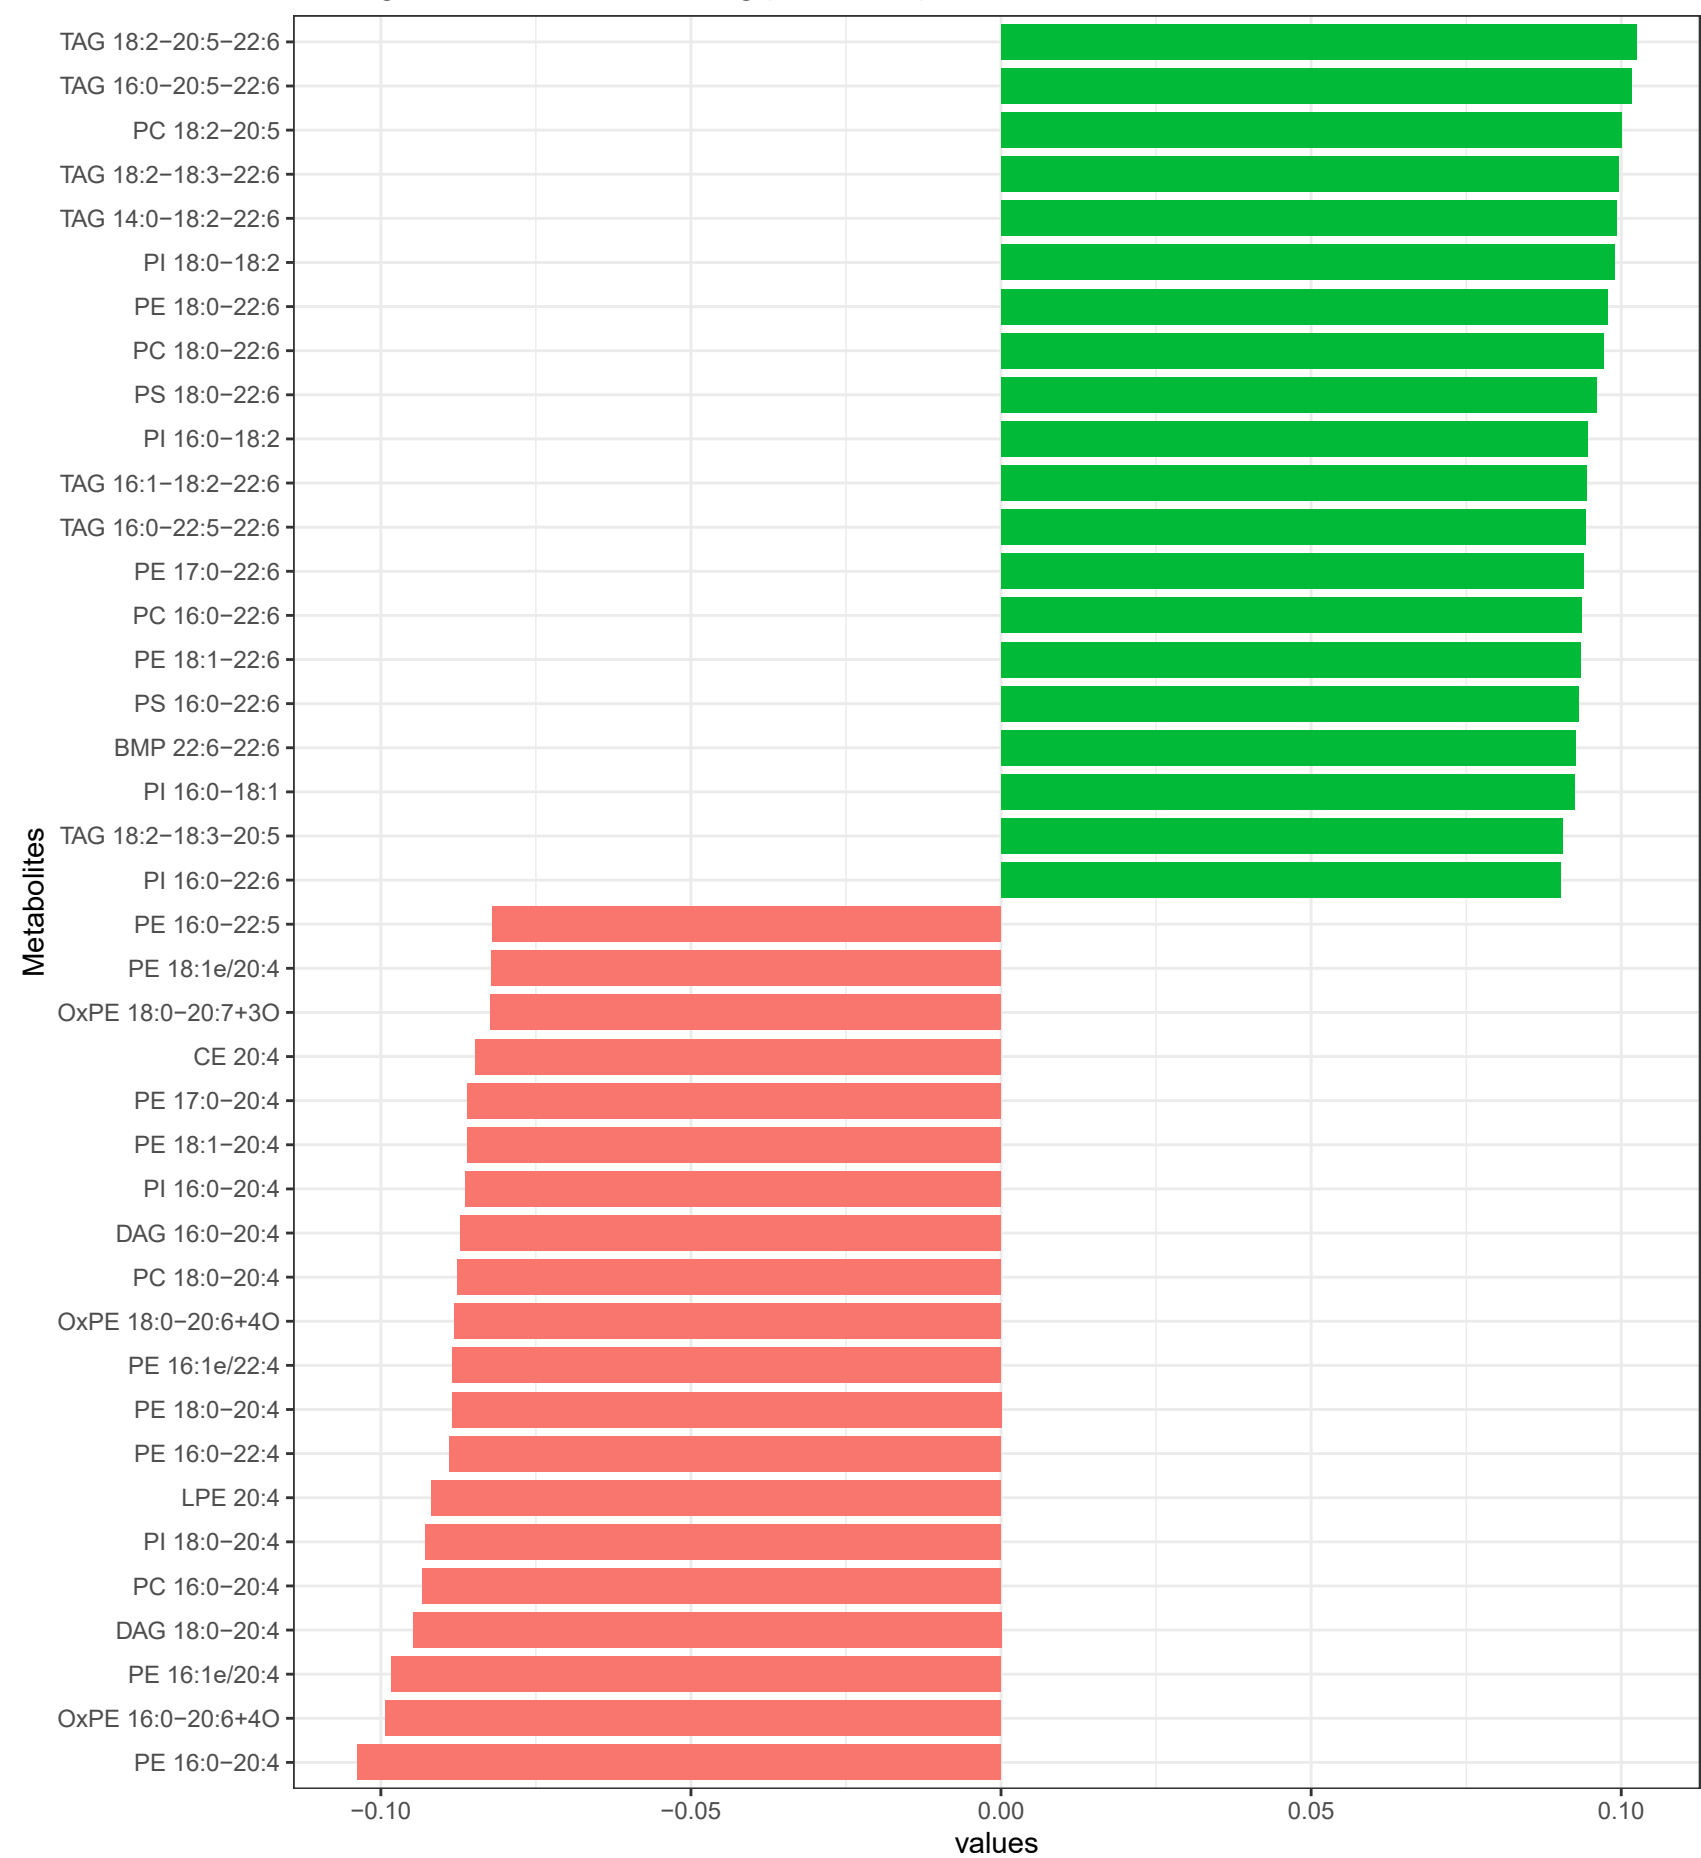

Untargeted: Liver PC2 loading plot for Top20 from max/min values

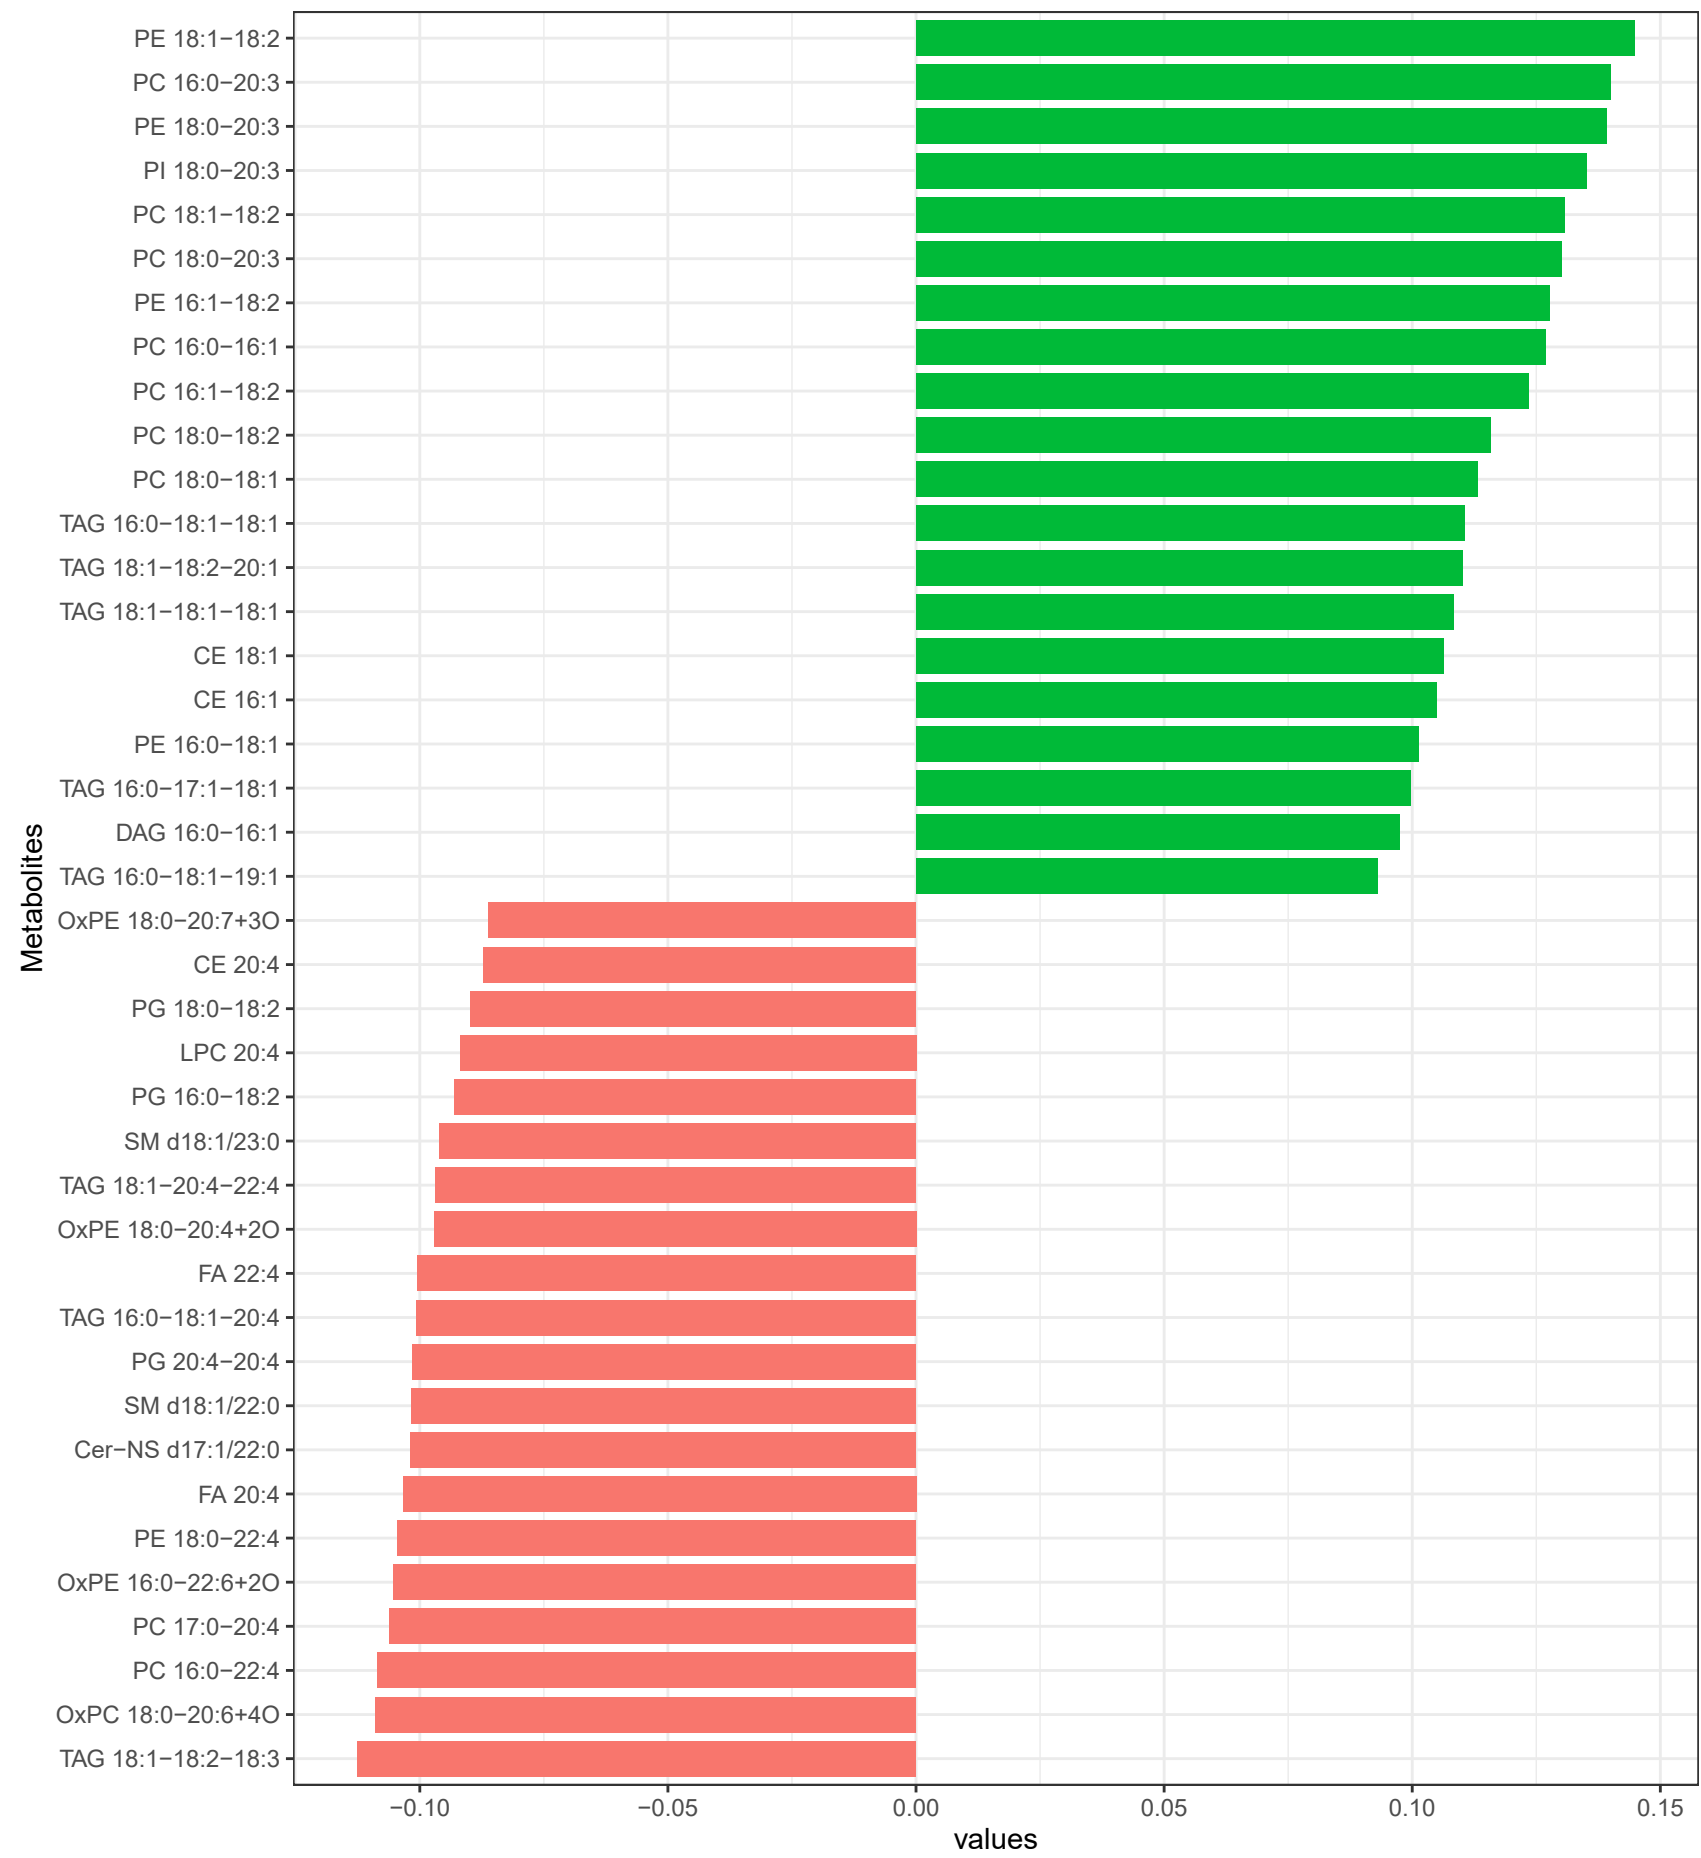

Untargeted: Plasma PC1 loading plot for Top20 from max/min values

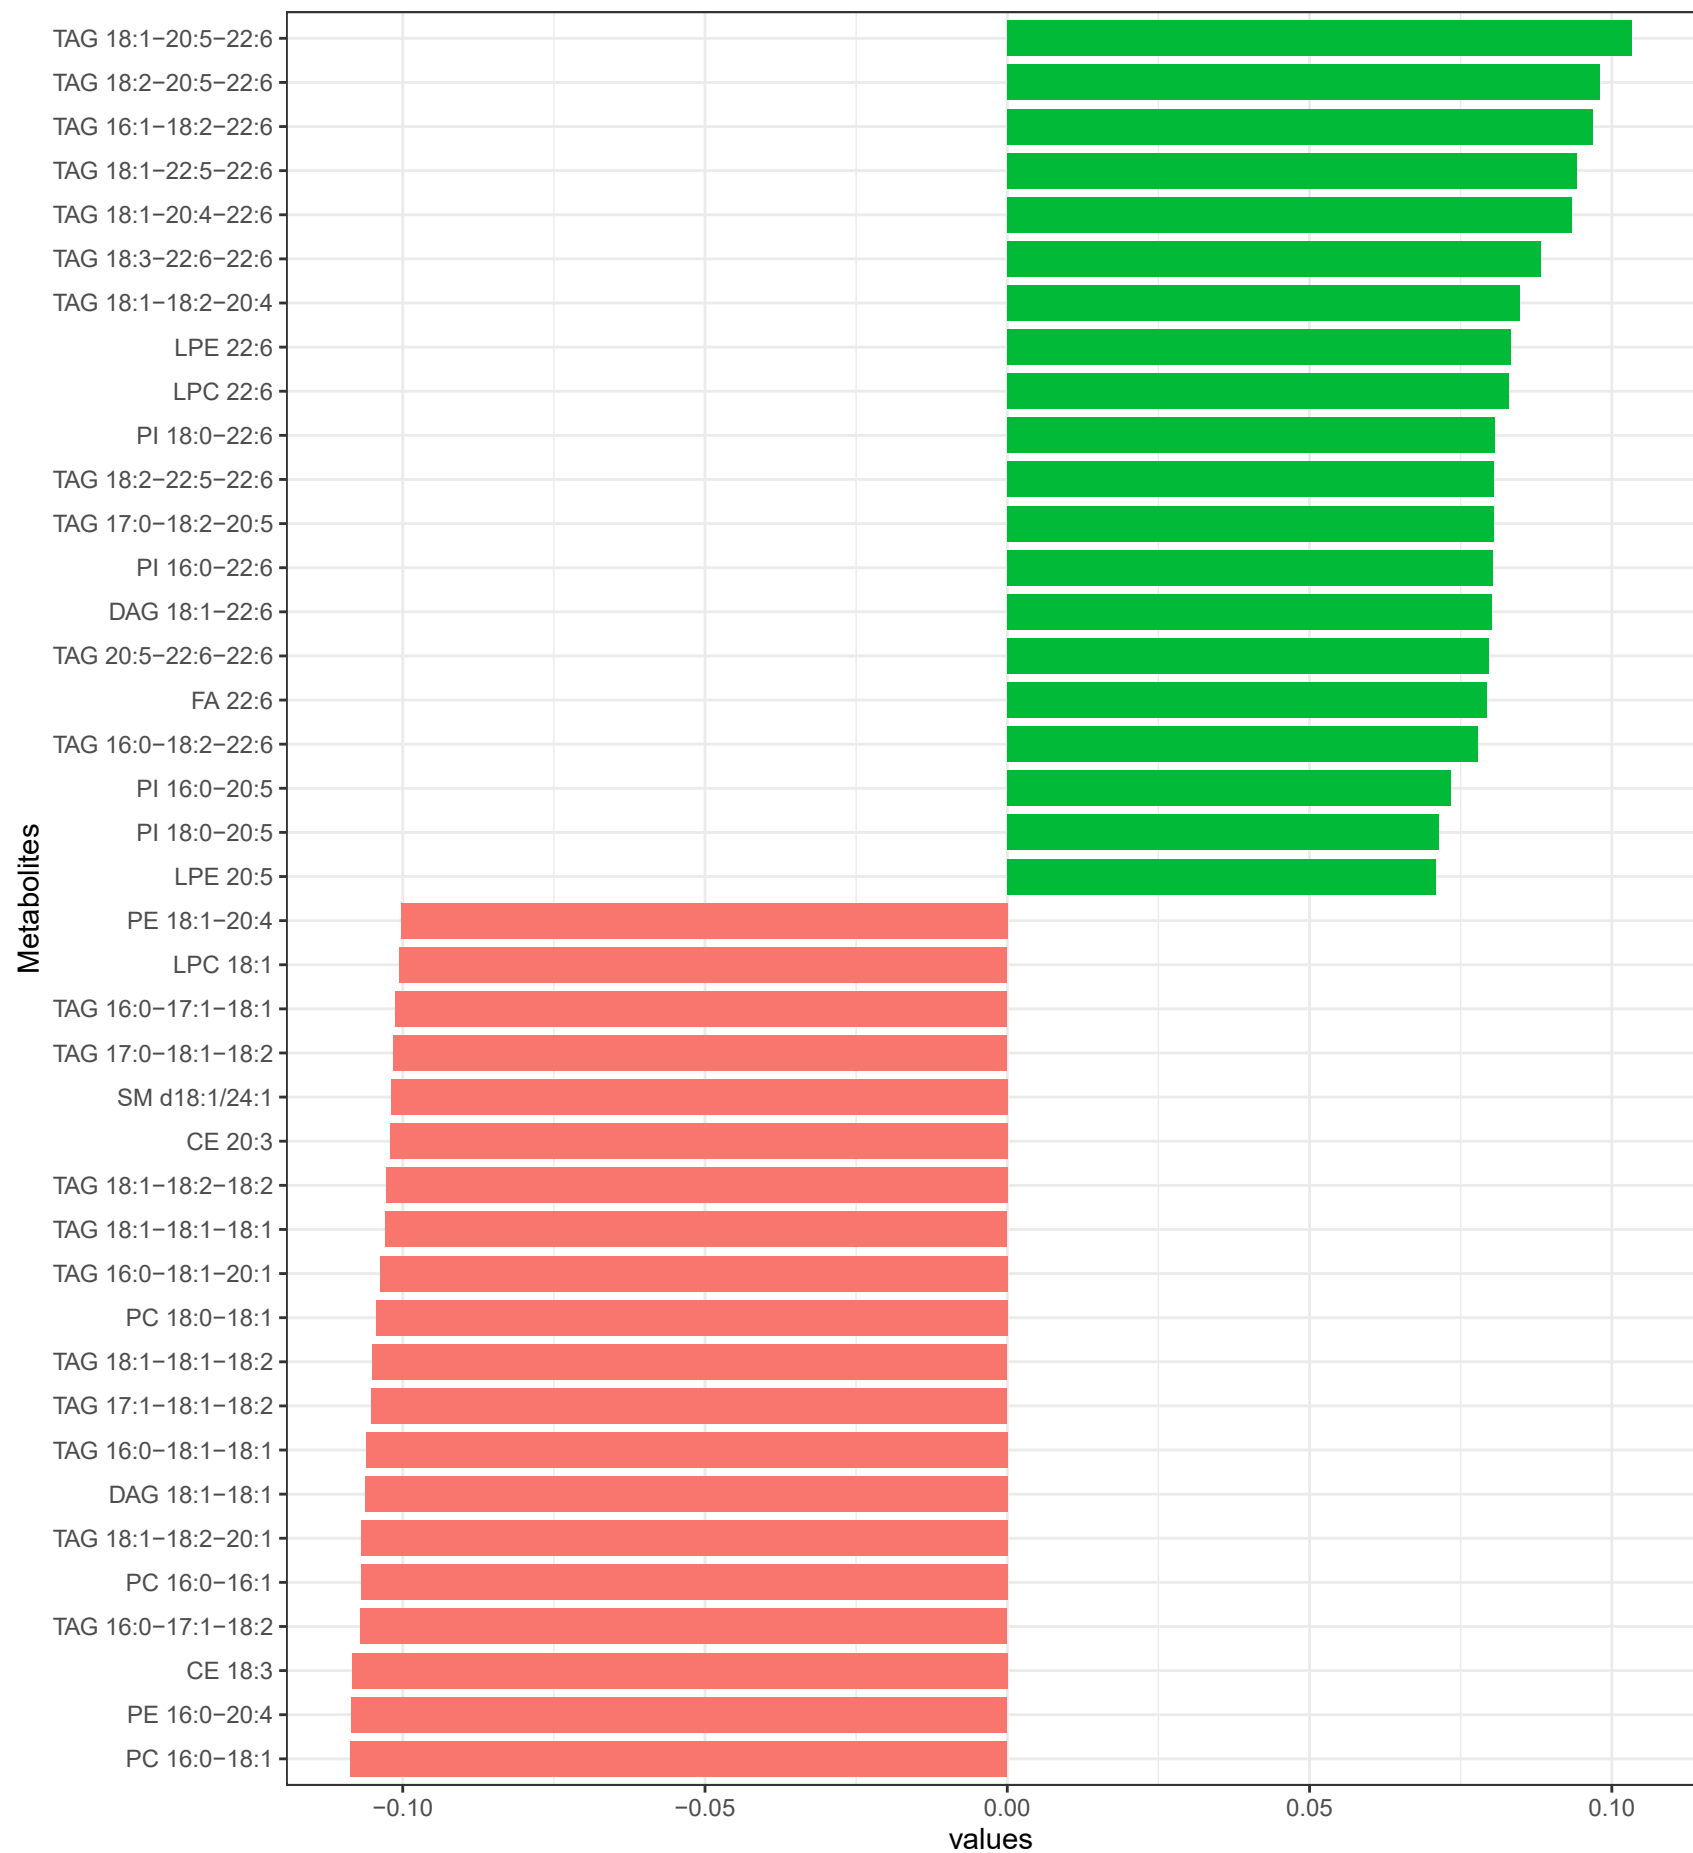

Untargeted: Plasma PC2 loading plot for Top20 from max/min values

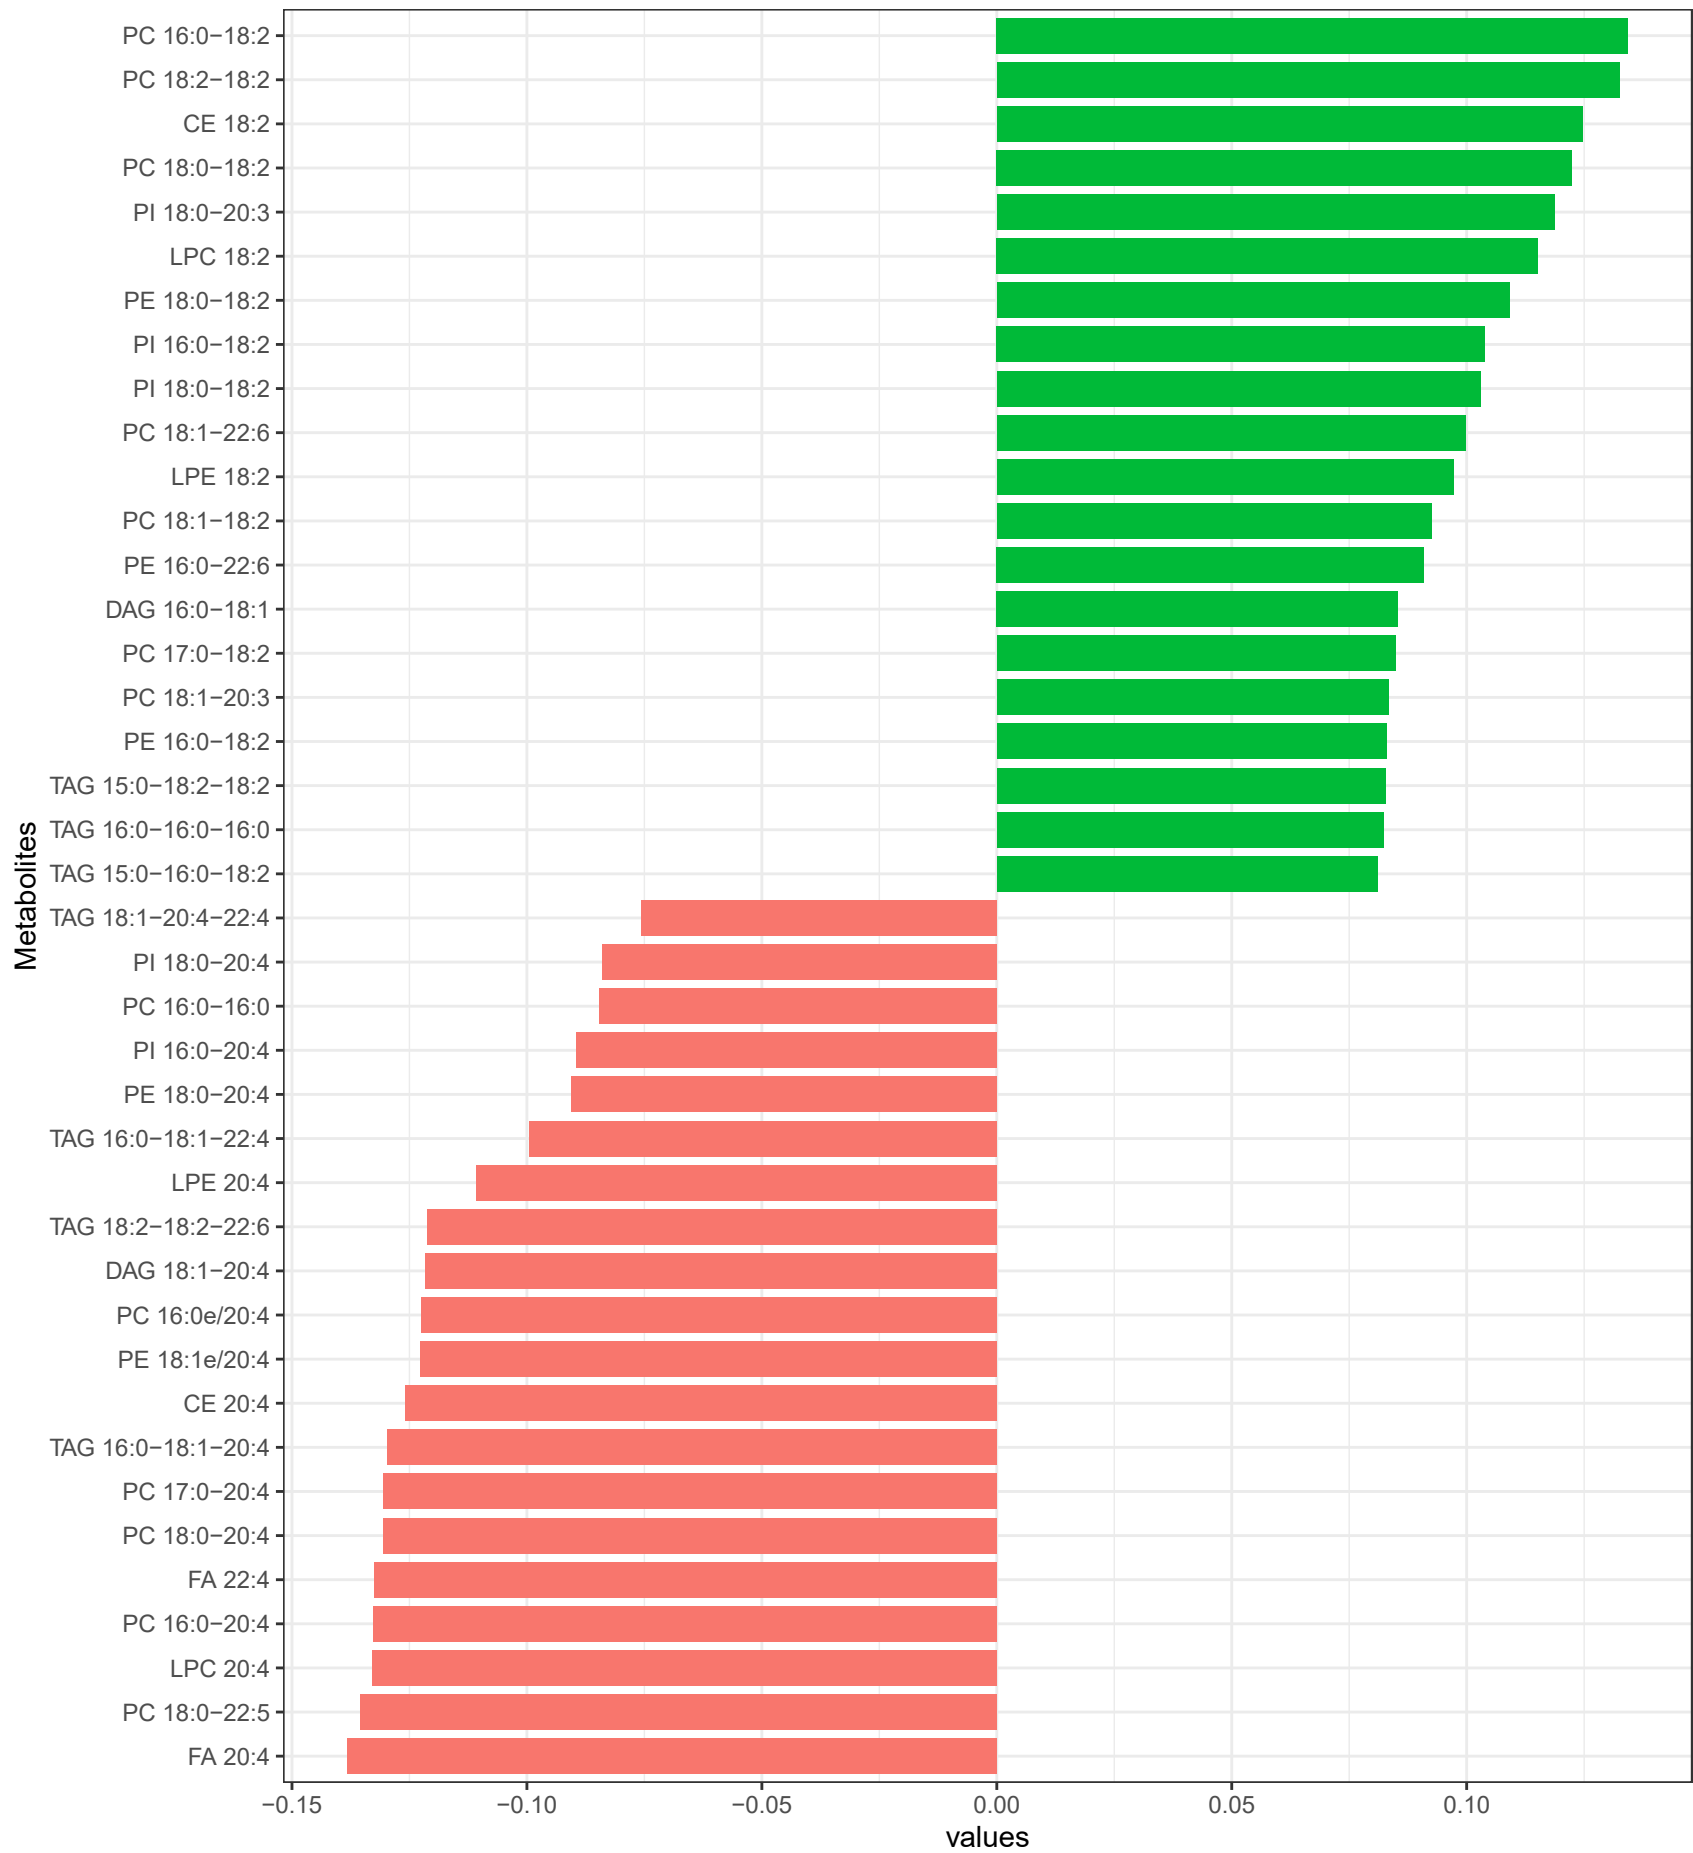

Untargeted: Kidney PC1 loading plot for Top20 from max/min values

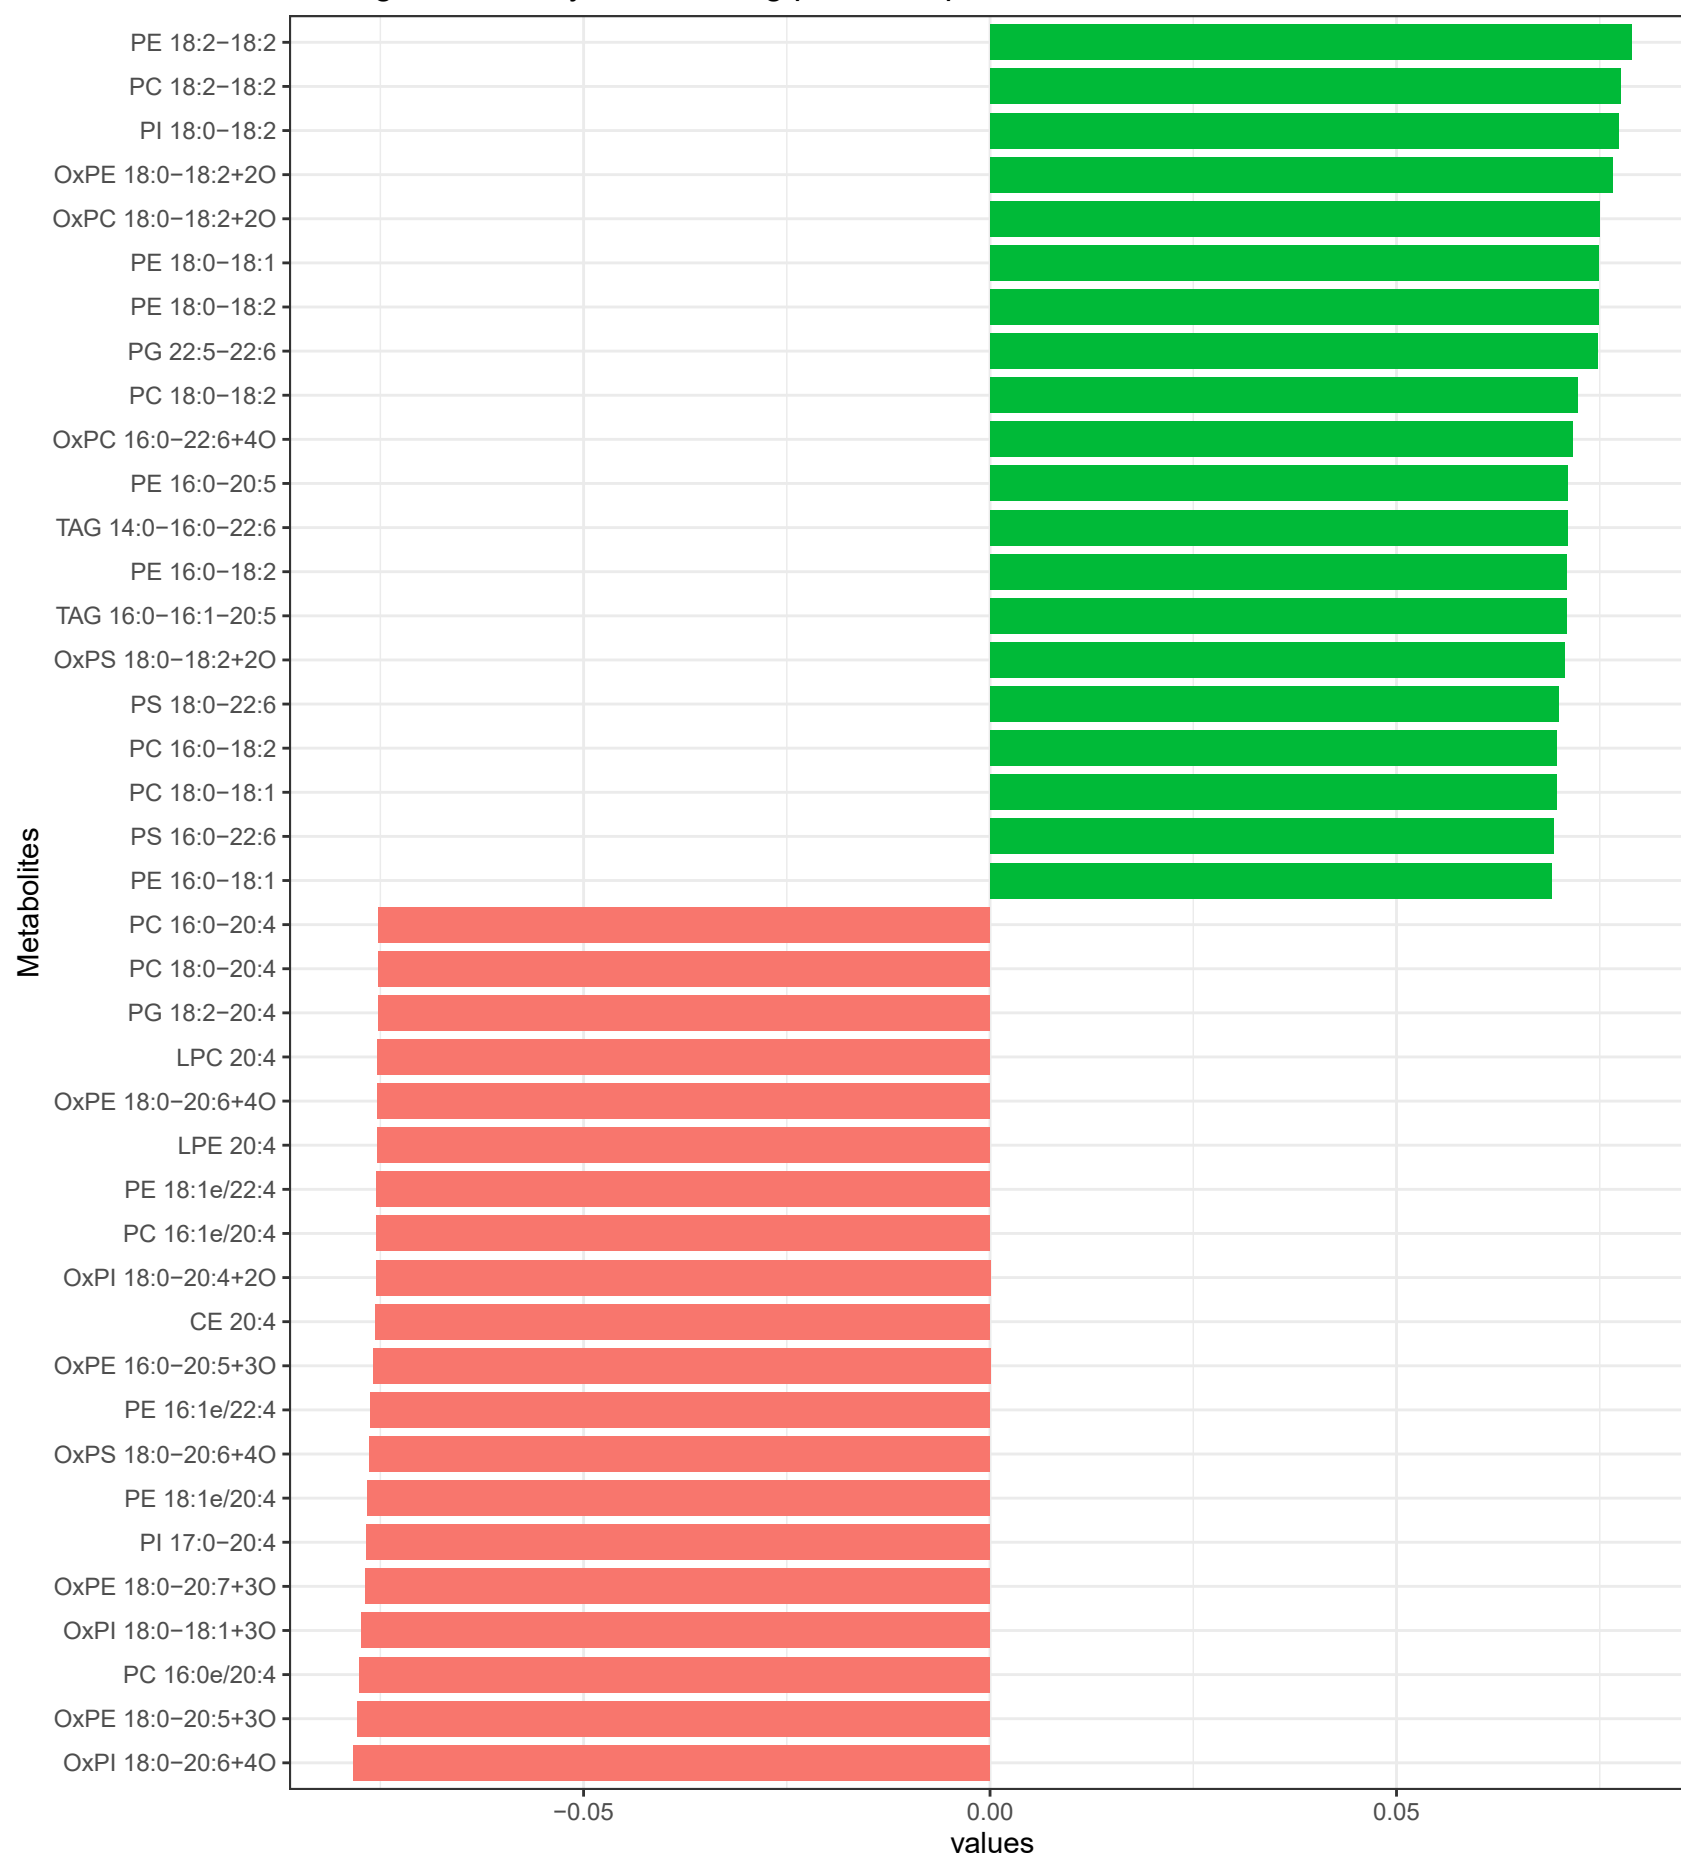

Untargeted: Kidney PC2 loading plot for Top20 from max/min values

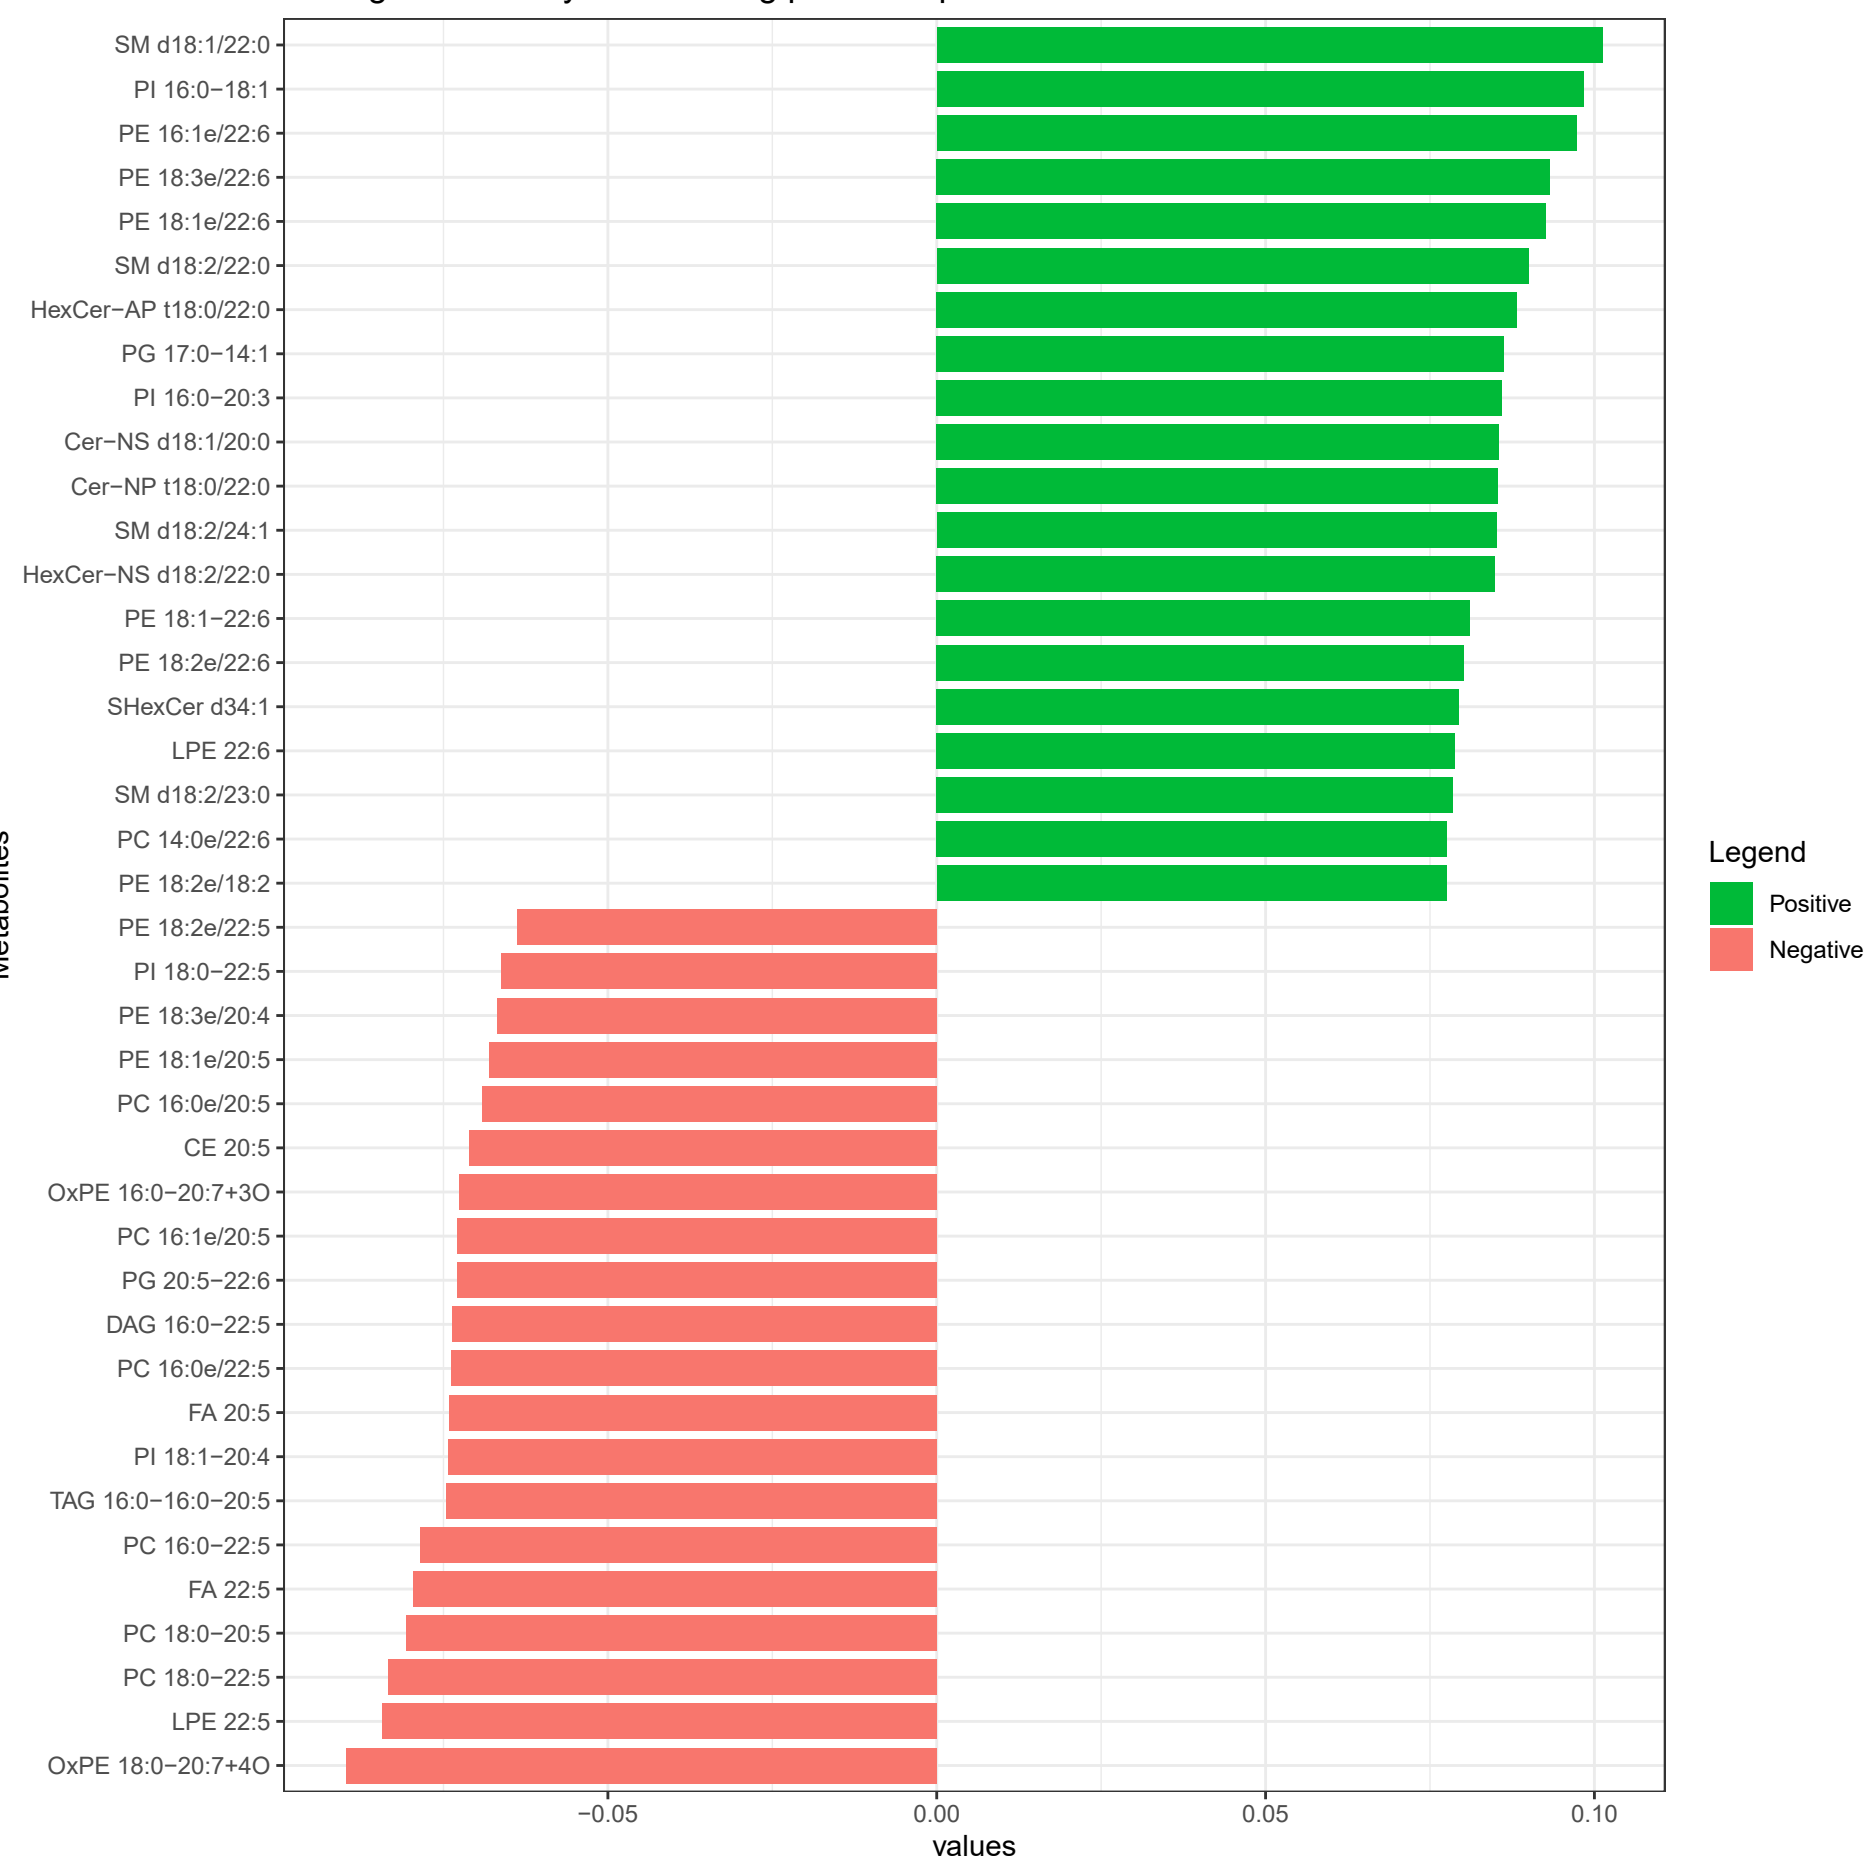

Untargeted: Spleen PC1 loading plot for Top20 from max/min values

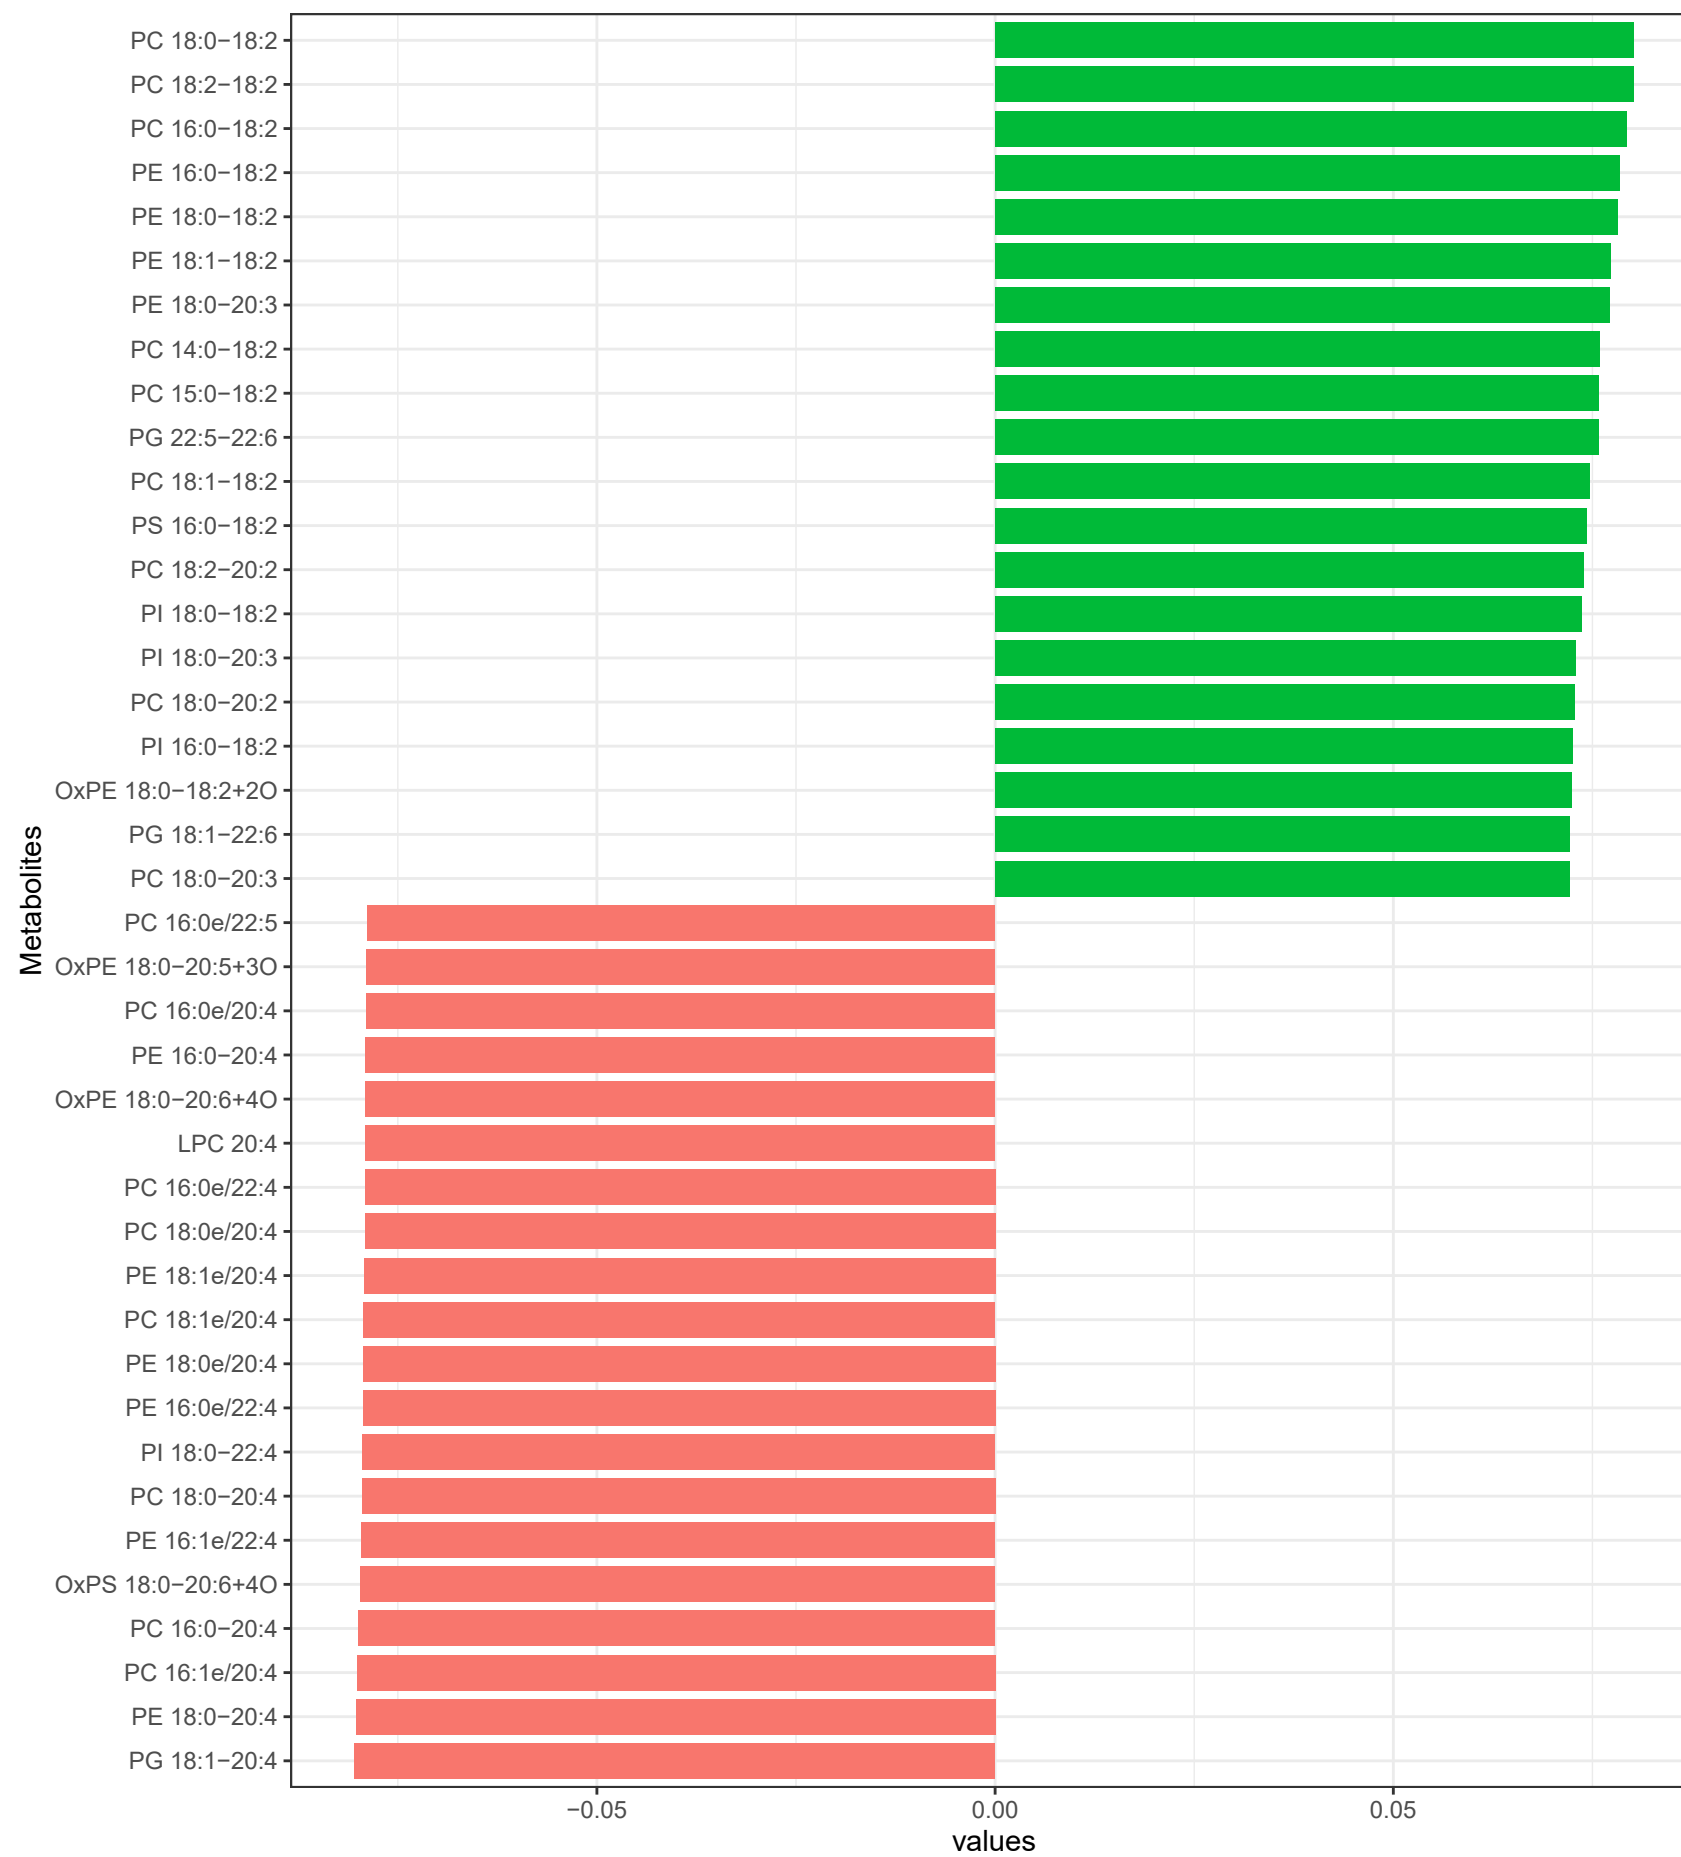

Untargeted: Spleen PC2 loading plot for Top20 from max/min values

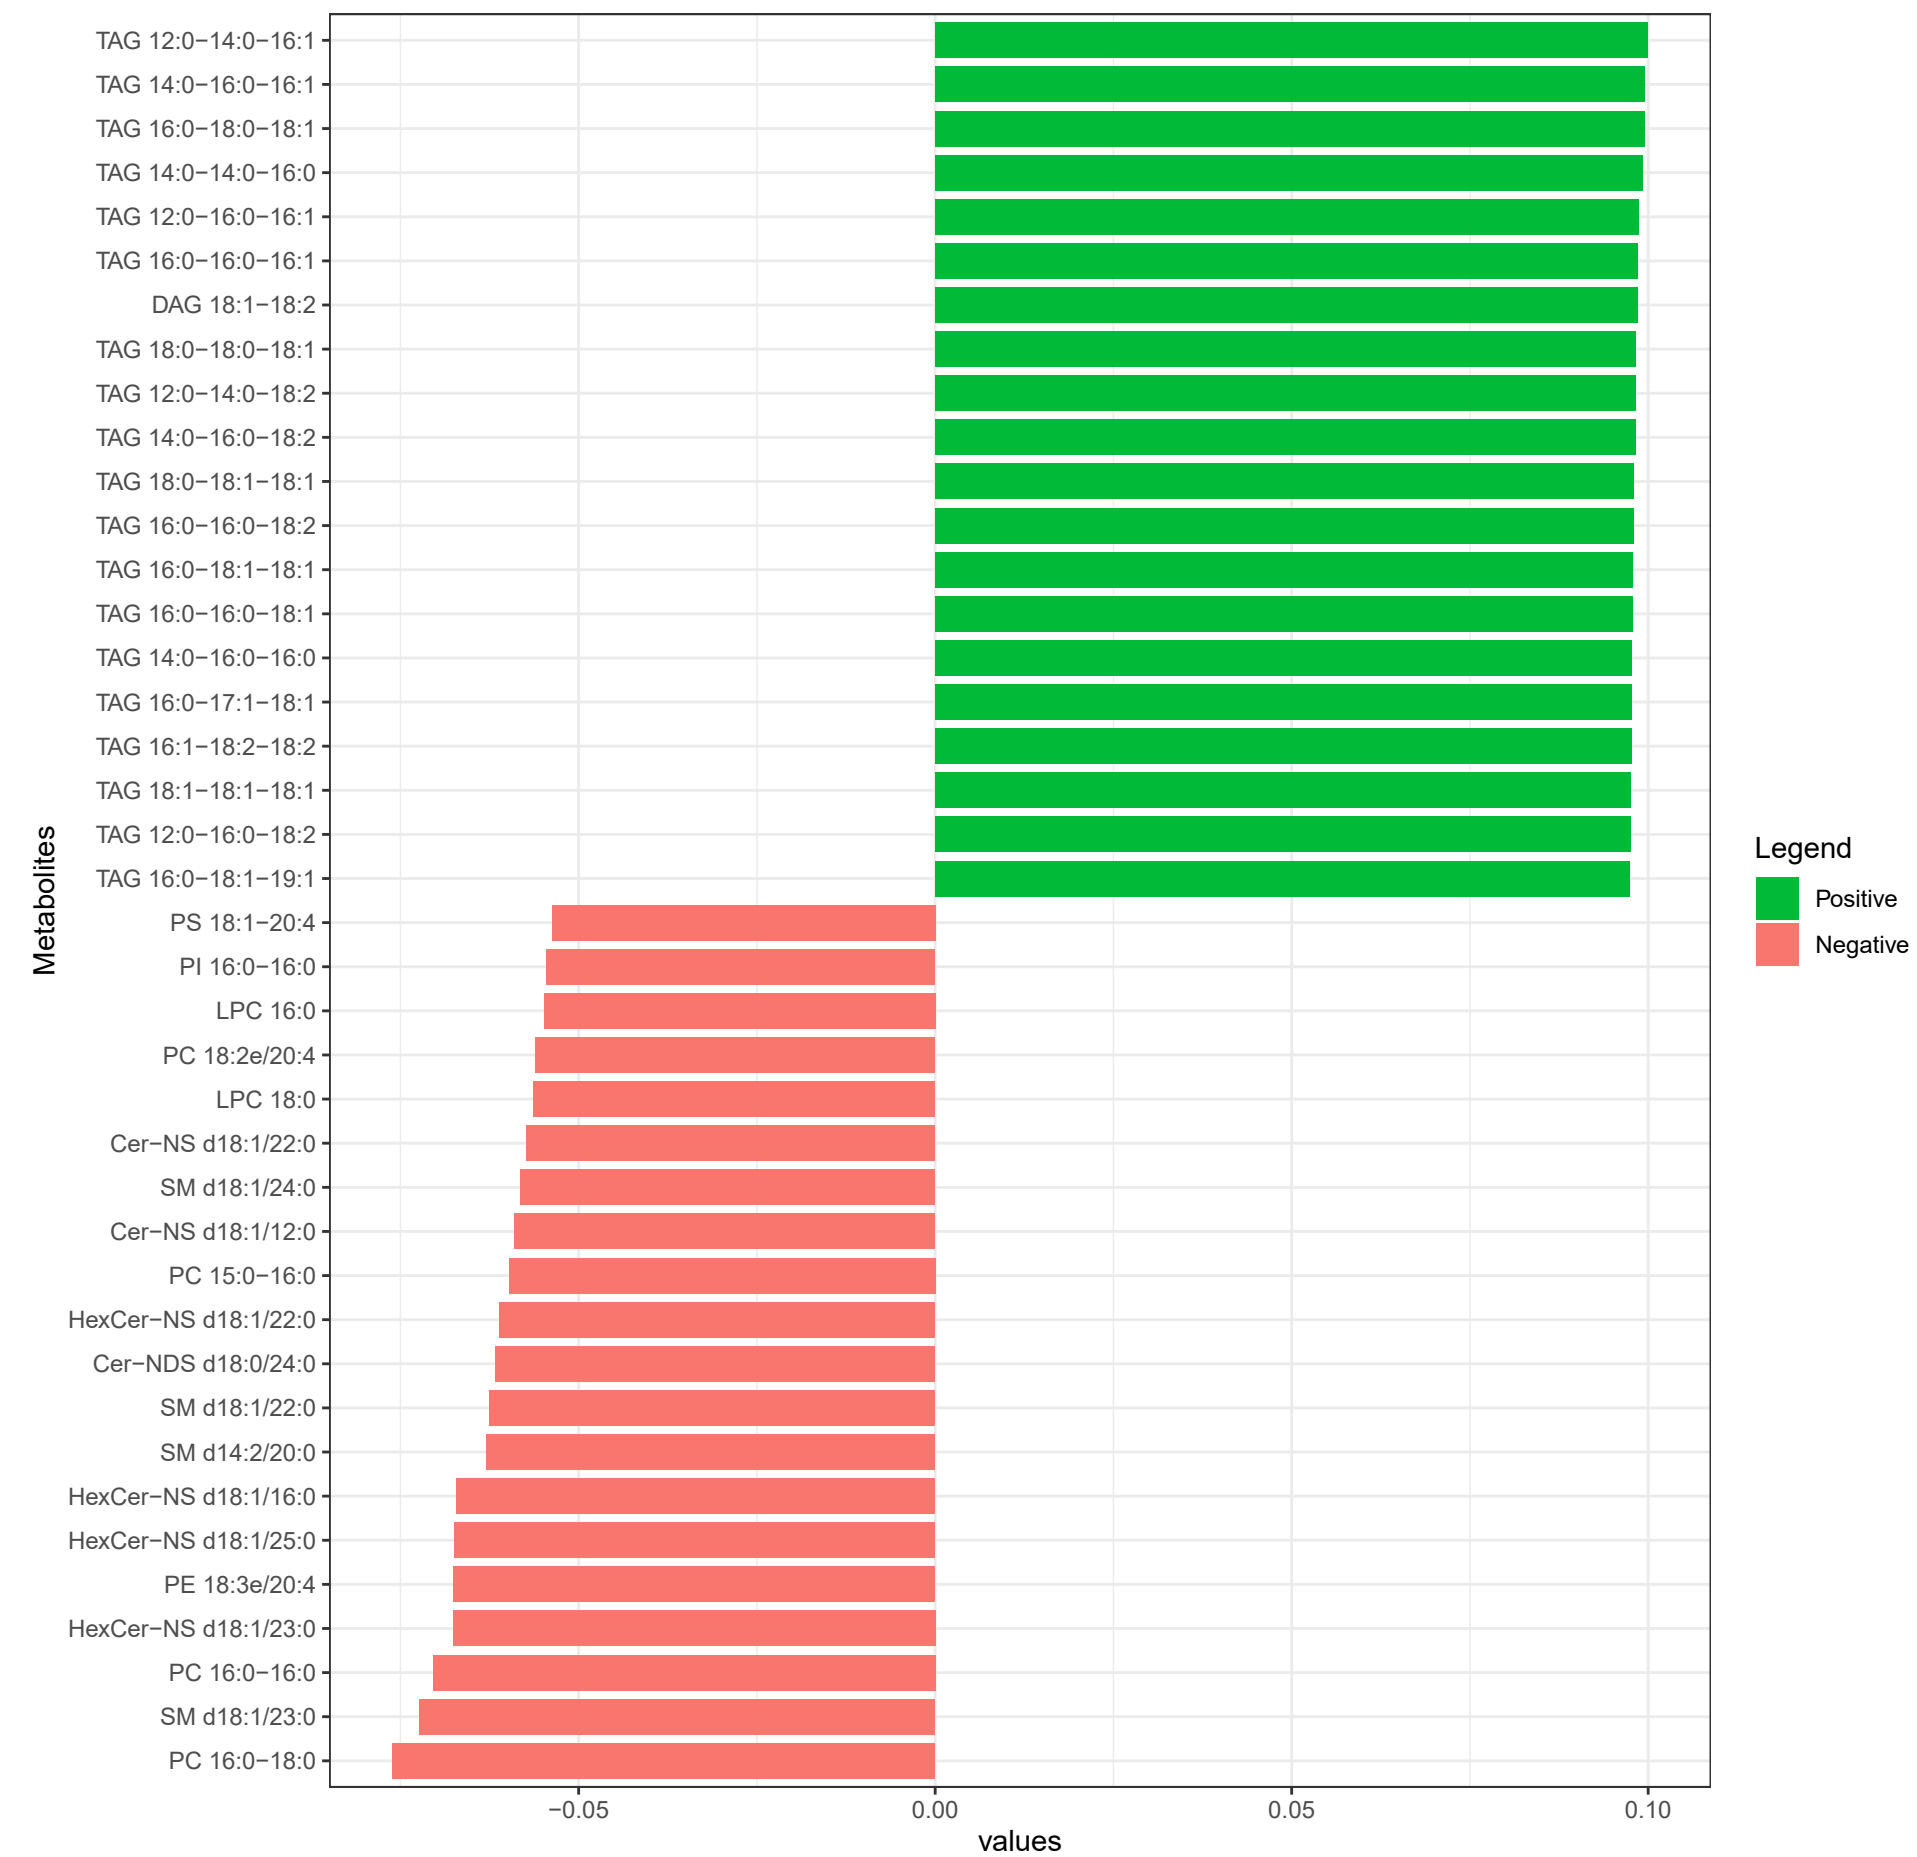

Untargeted: Lung PC1 loading plot for Top20 from max/min values

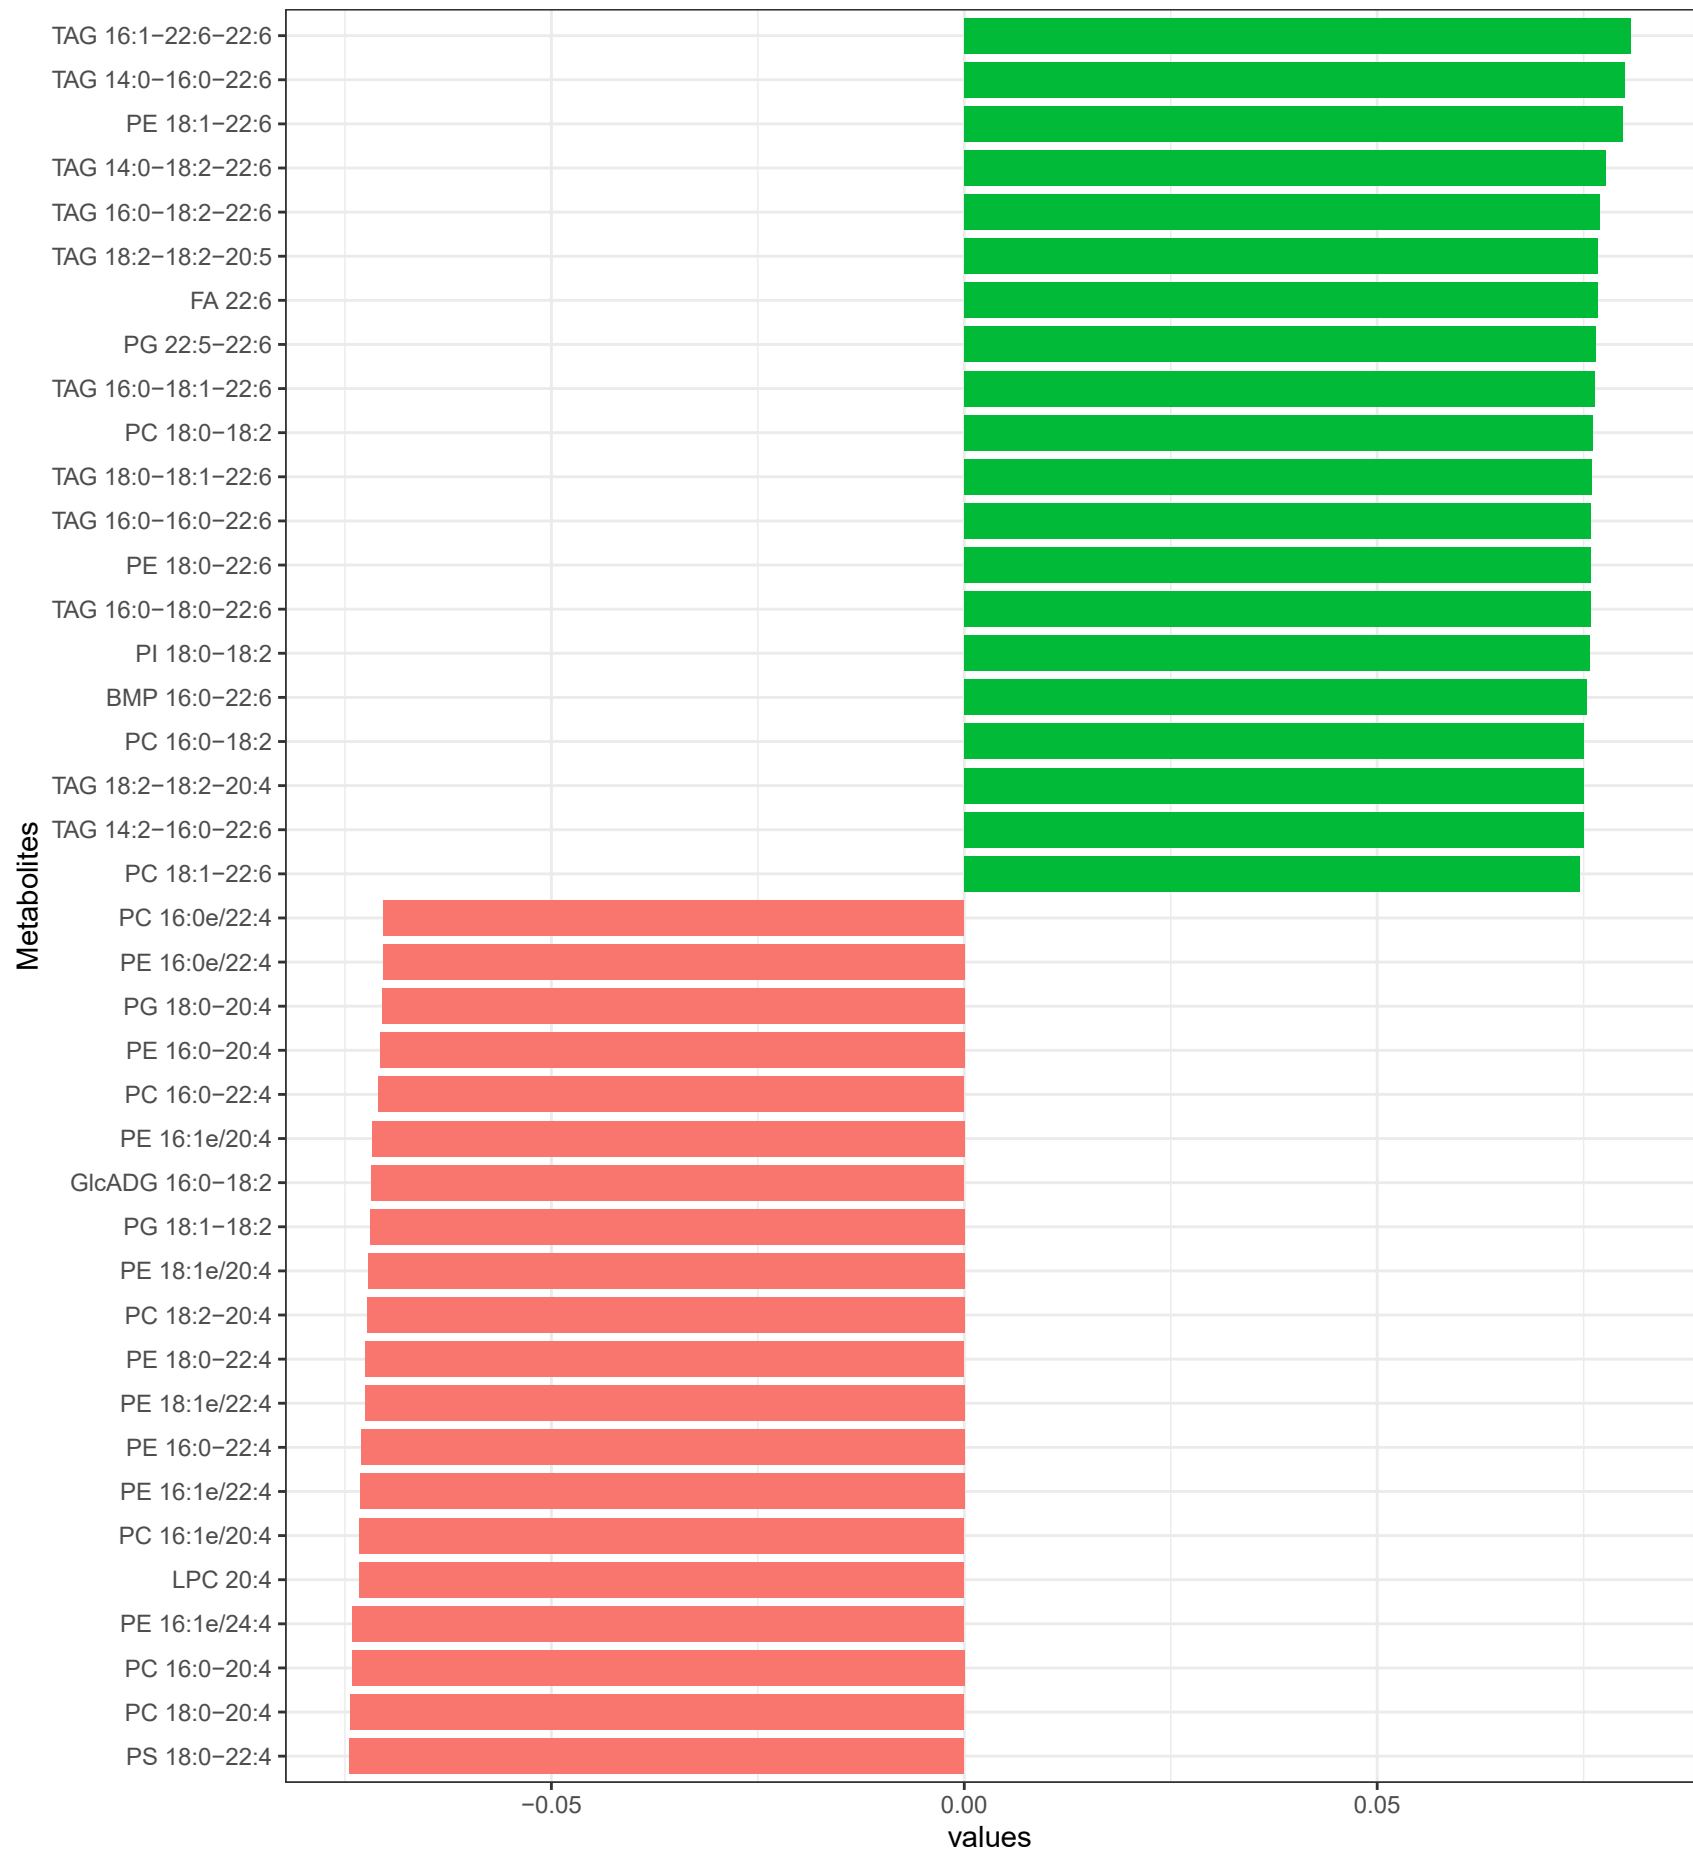

Untargeted: Lung PC2 loading plot for Top20 from max/min values

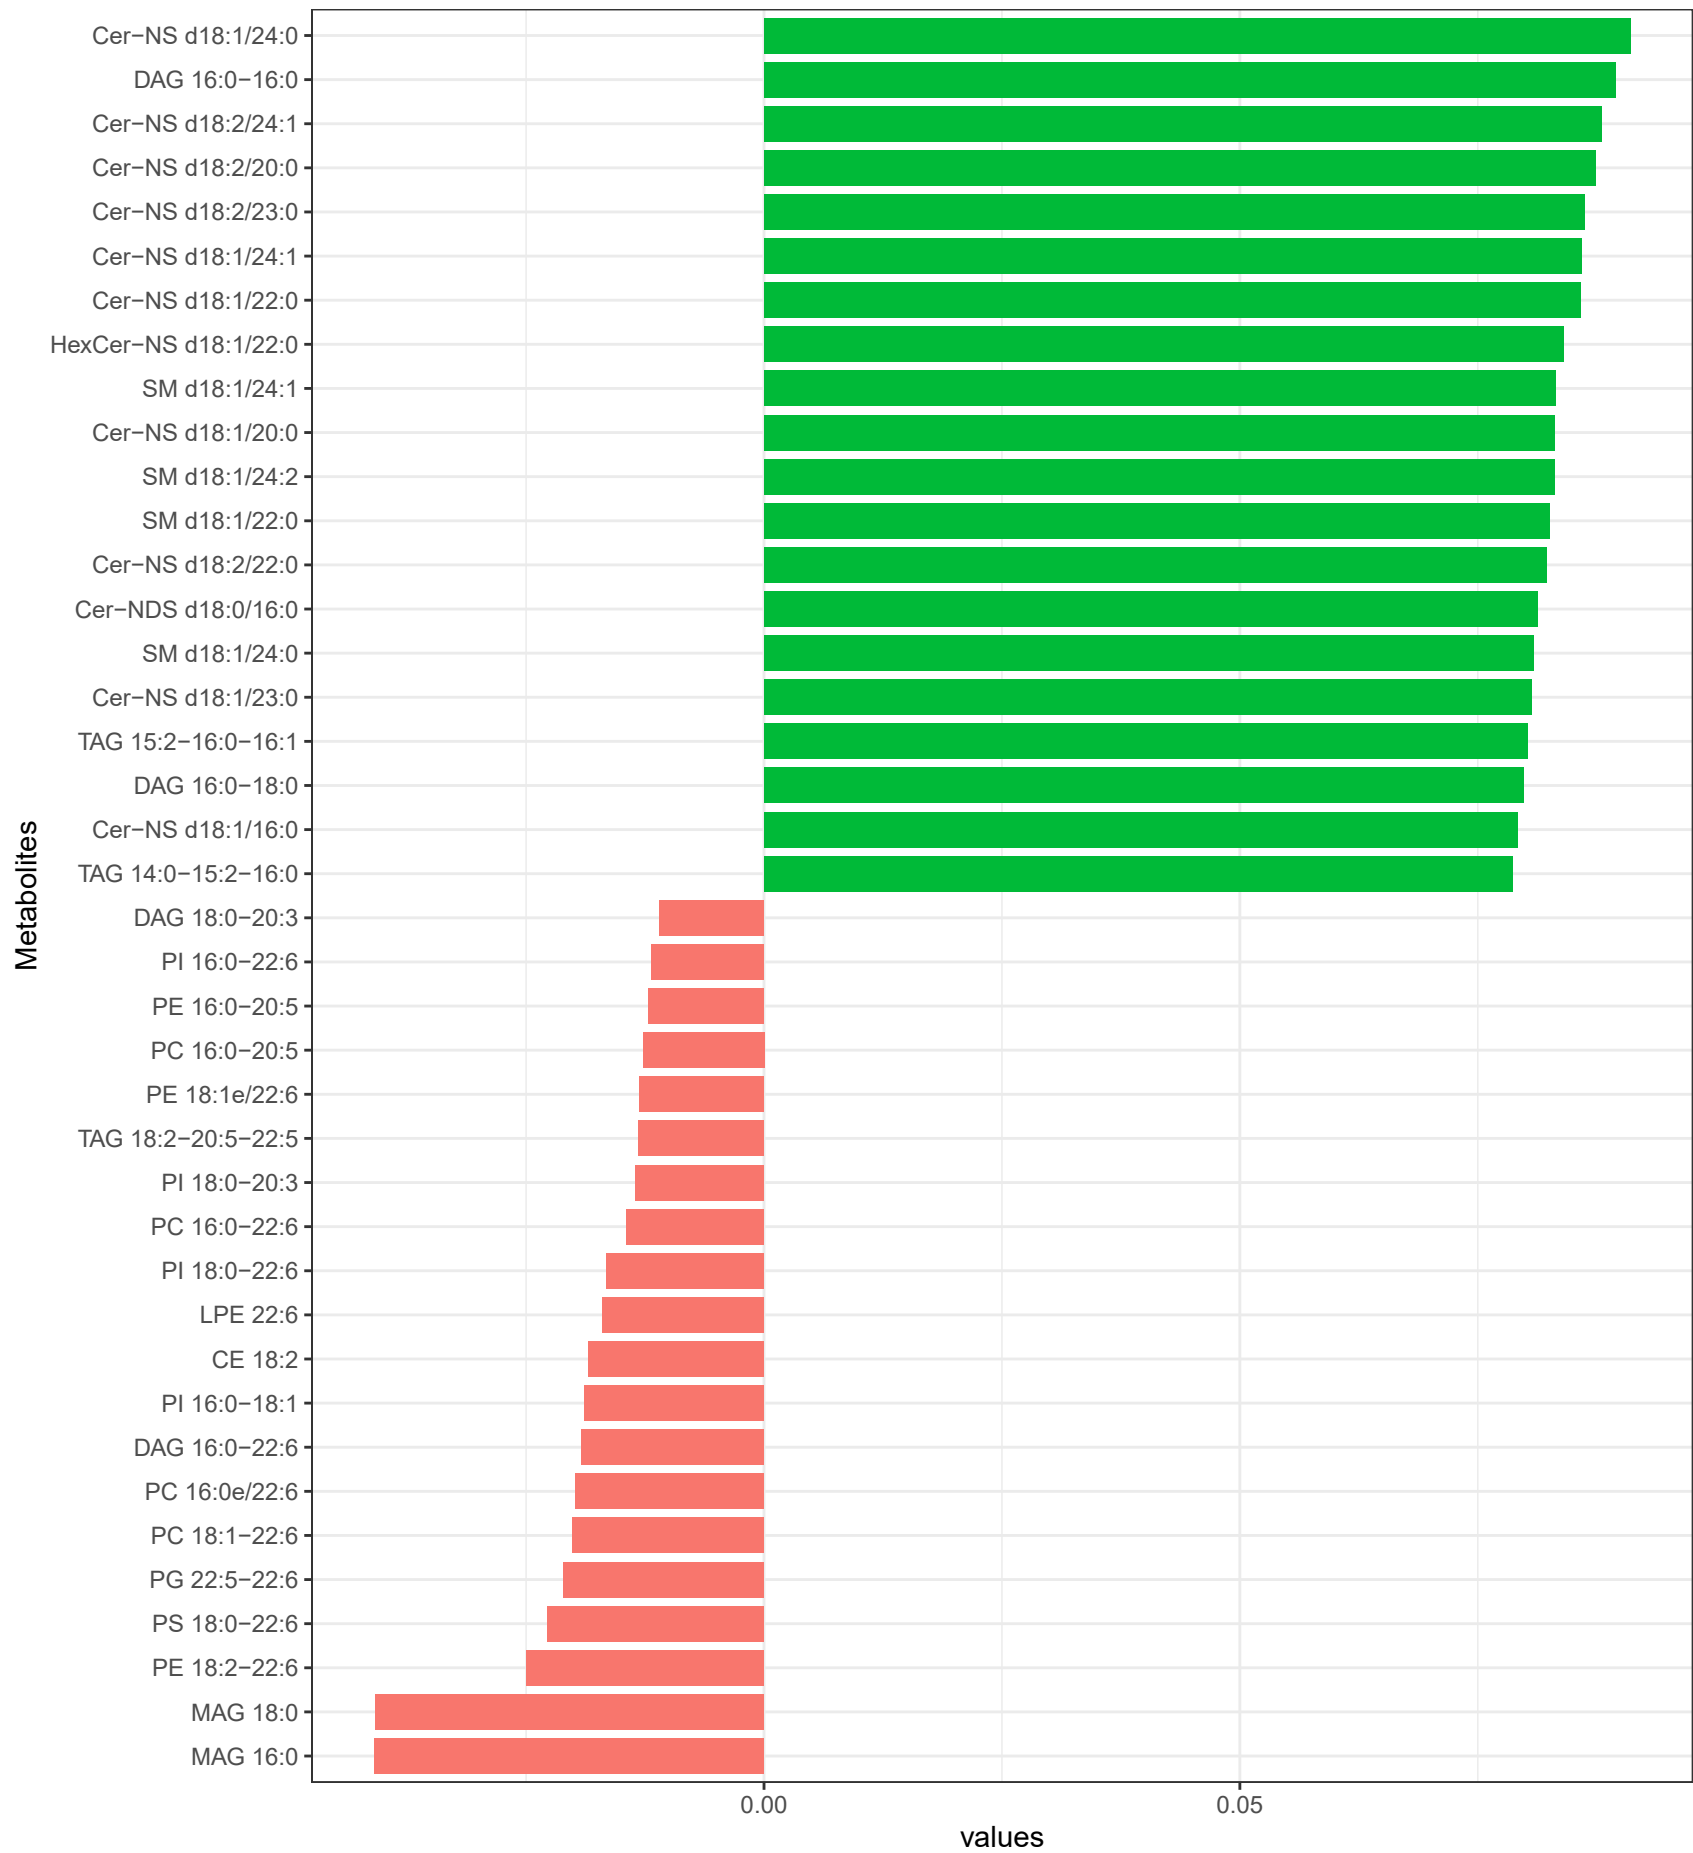

Untargeted: Small intestine PC1 loading plot for Top20 from max/min values

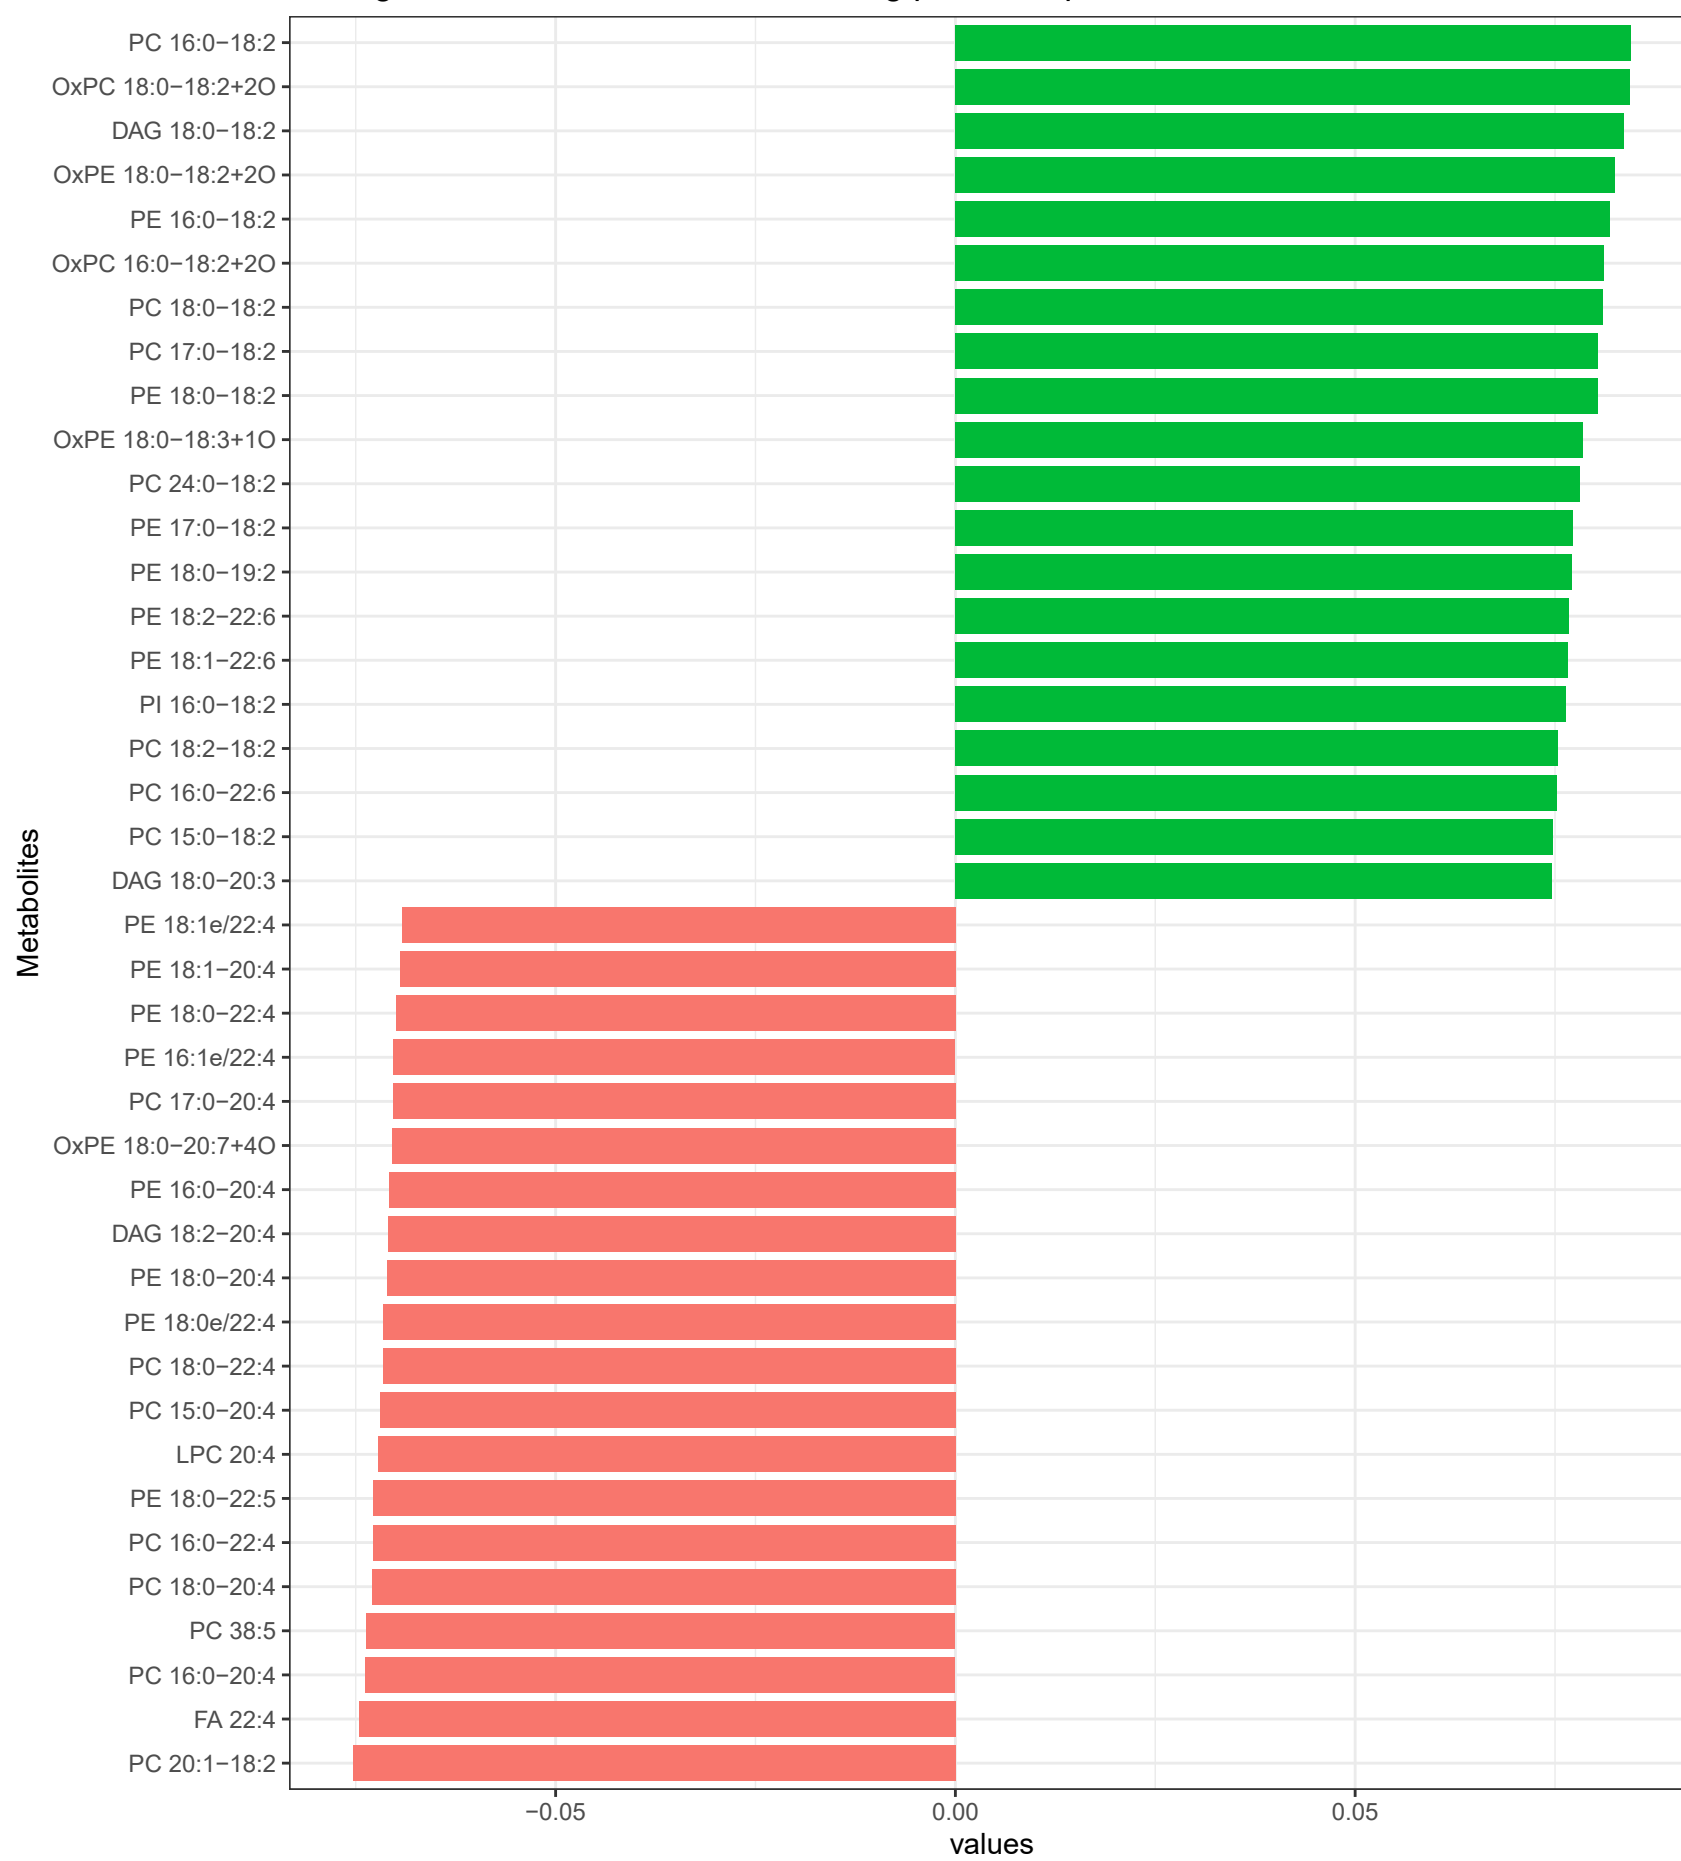

Untargeted: Small intestine PC2 loading plot for Top20 from max/min values

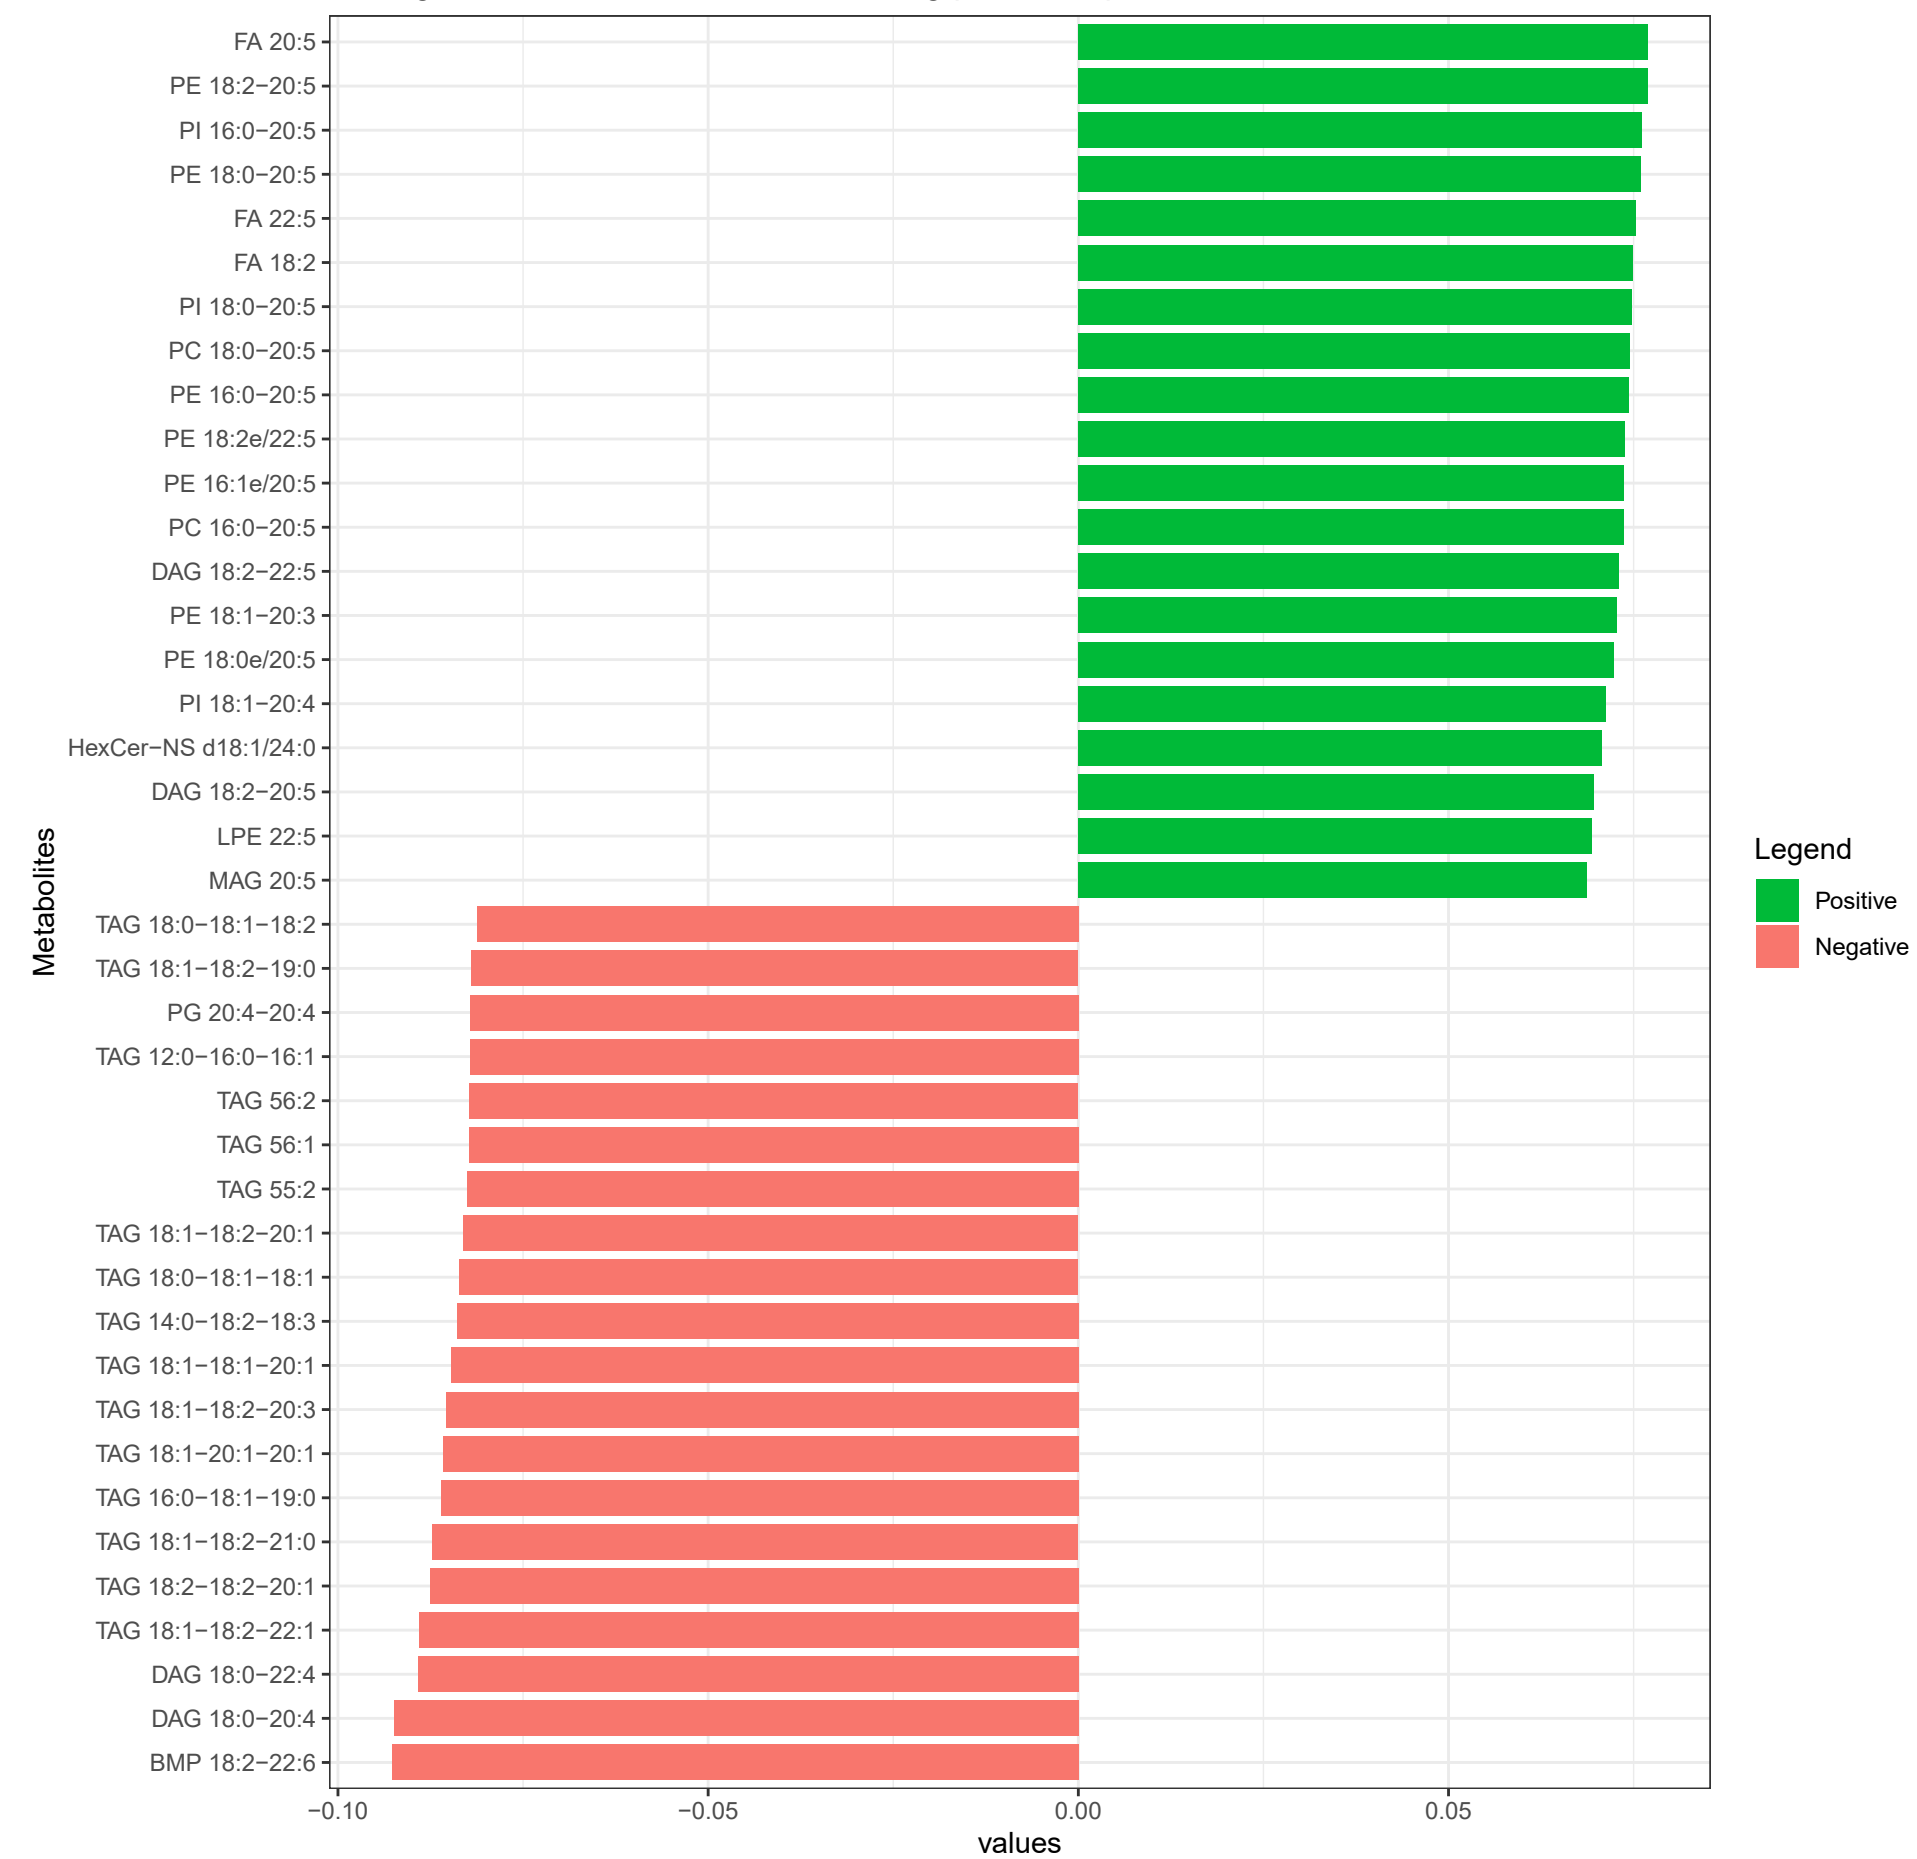

Untargeted: Skeletal muscle PC1 loading plot for Top20 from max/min values

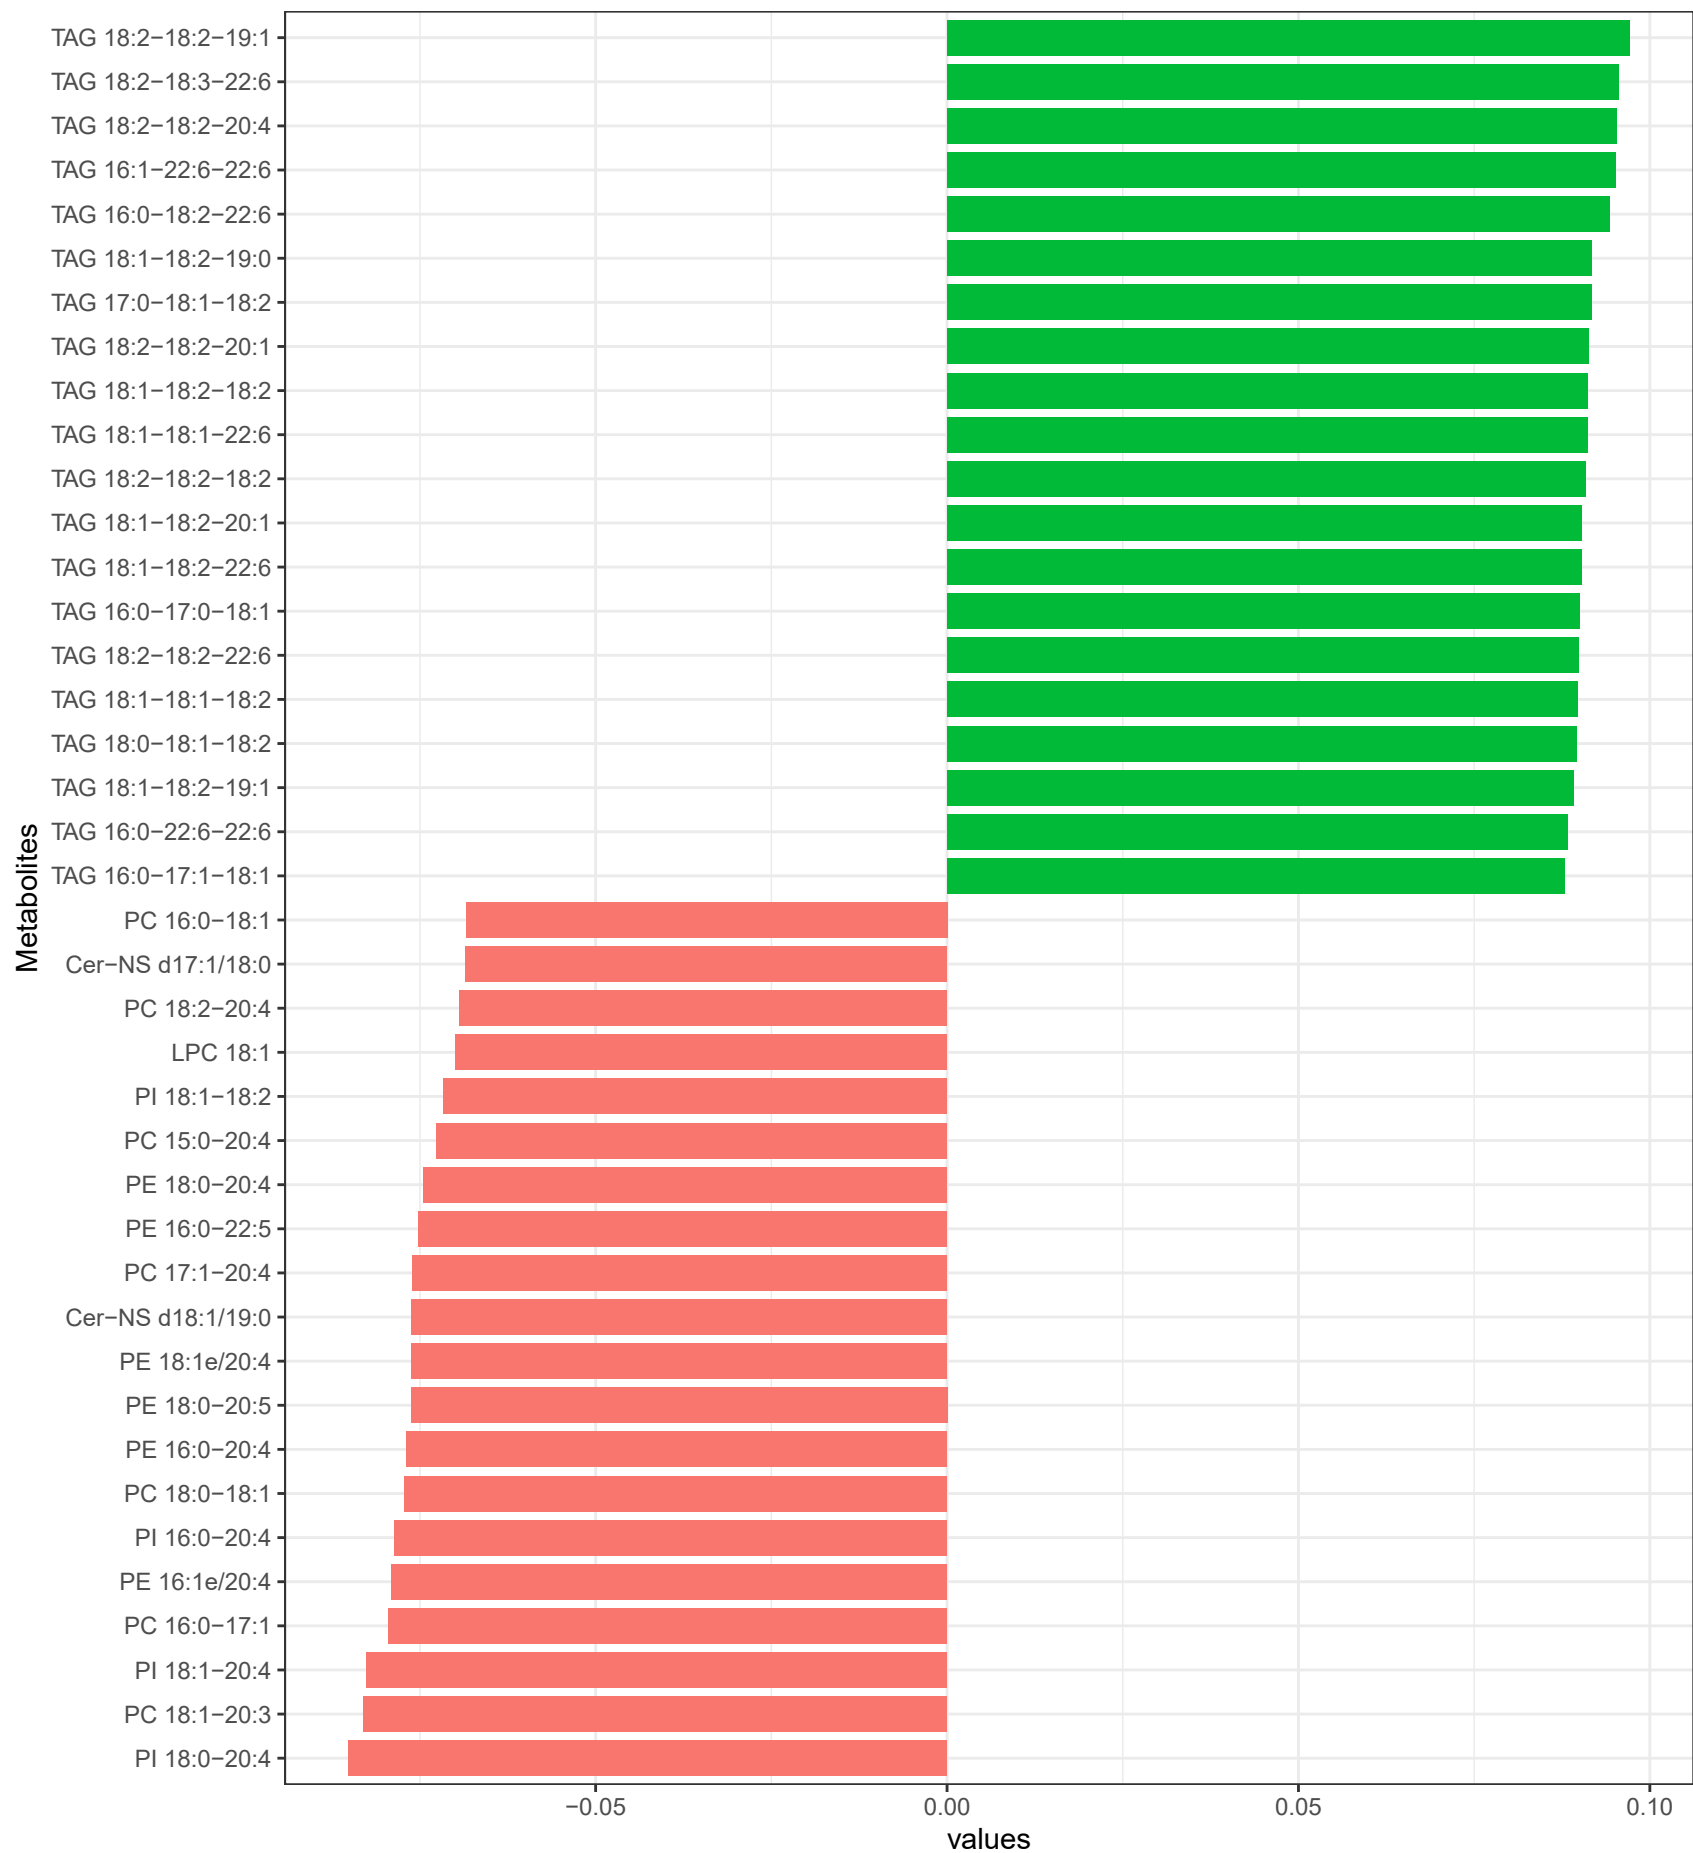

Untargeted: Skeletal muscle PC2 loading plot for Top20 from max/min values

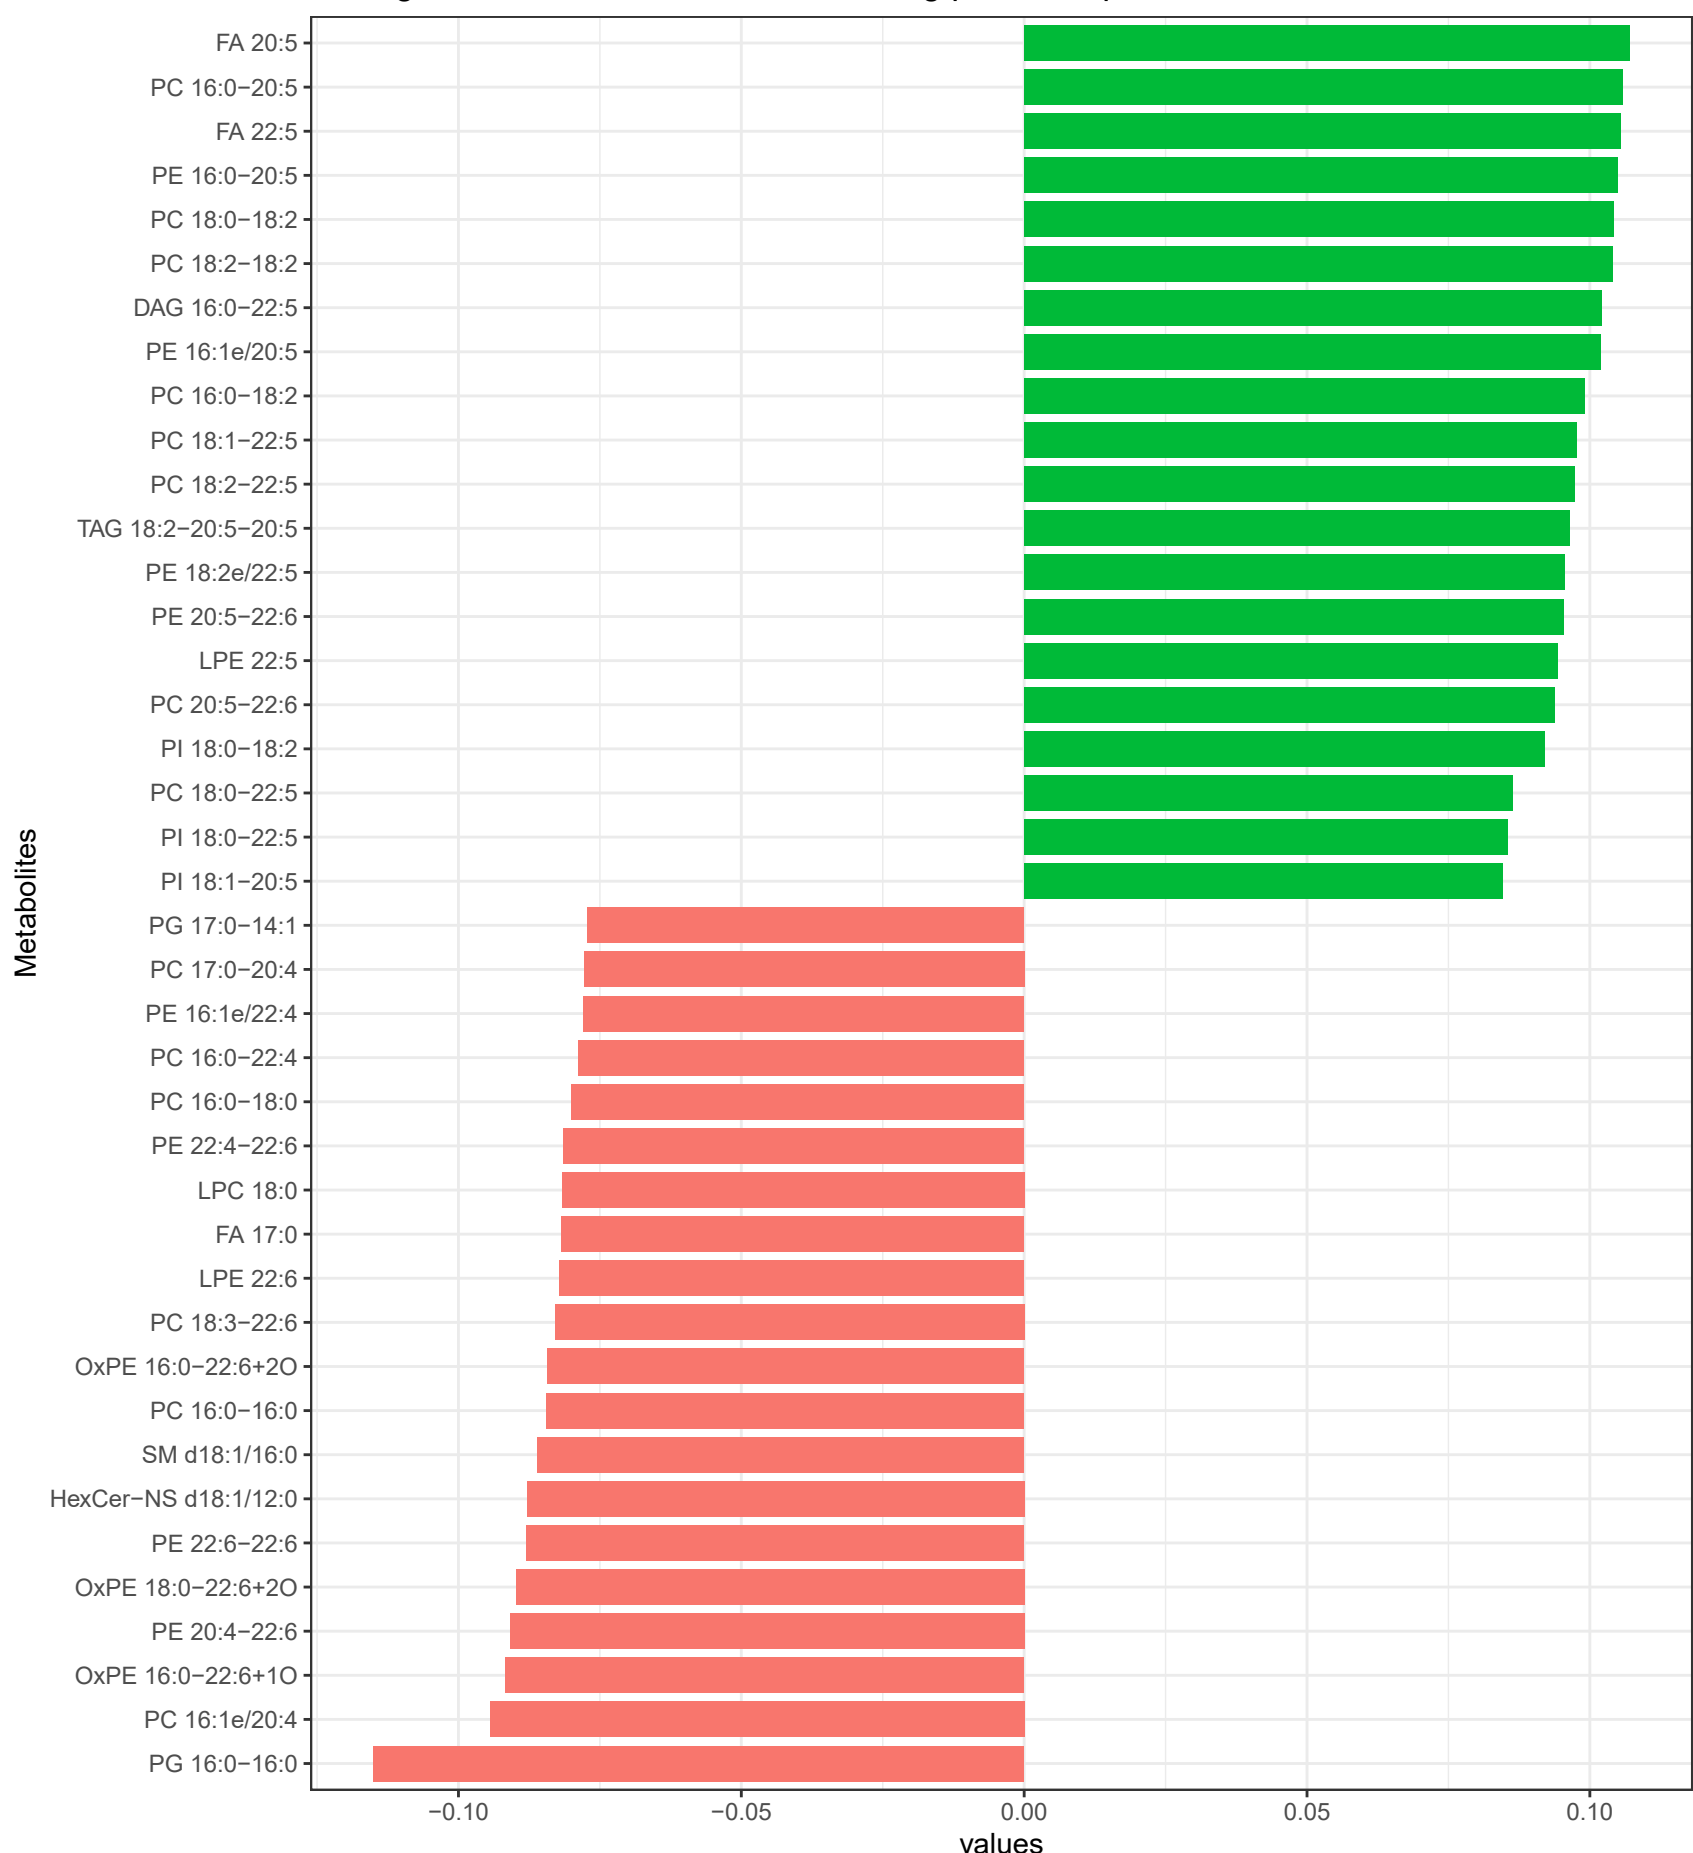

Untargeted: Adipose PC1 loading plot for Top20 from max/min values

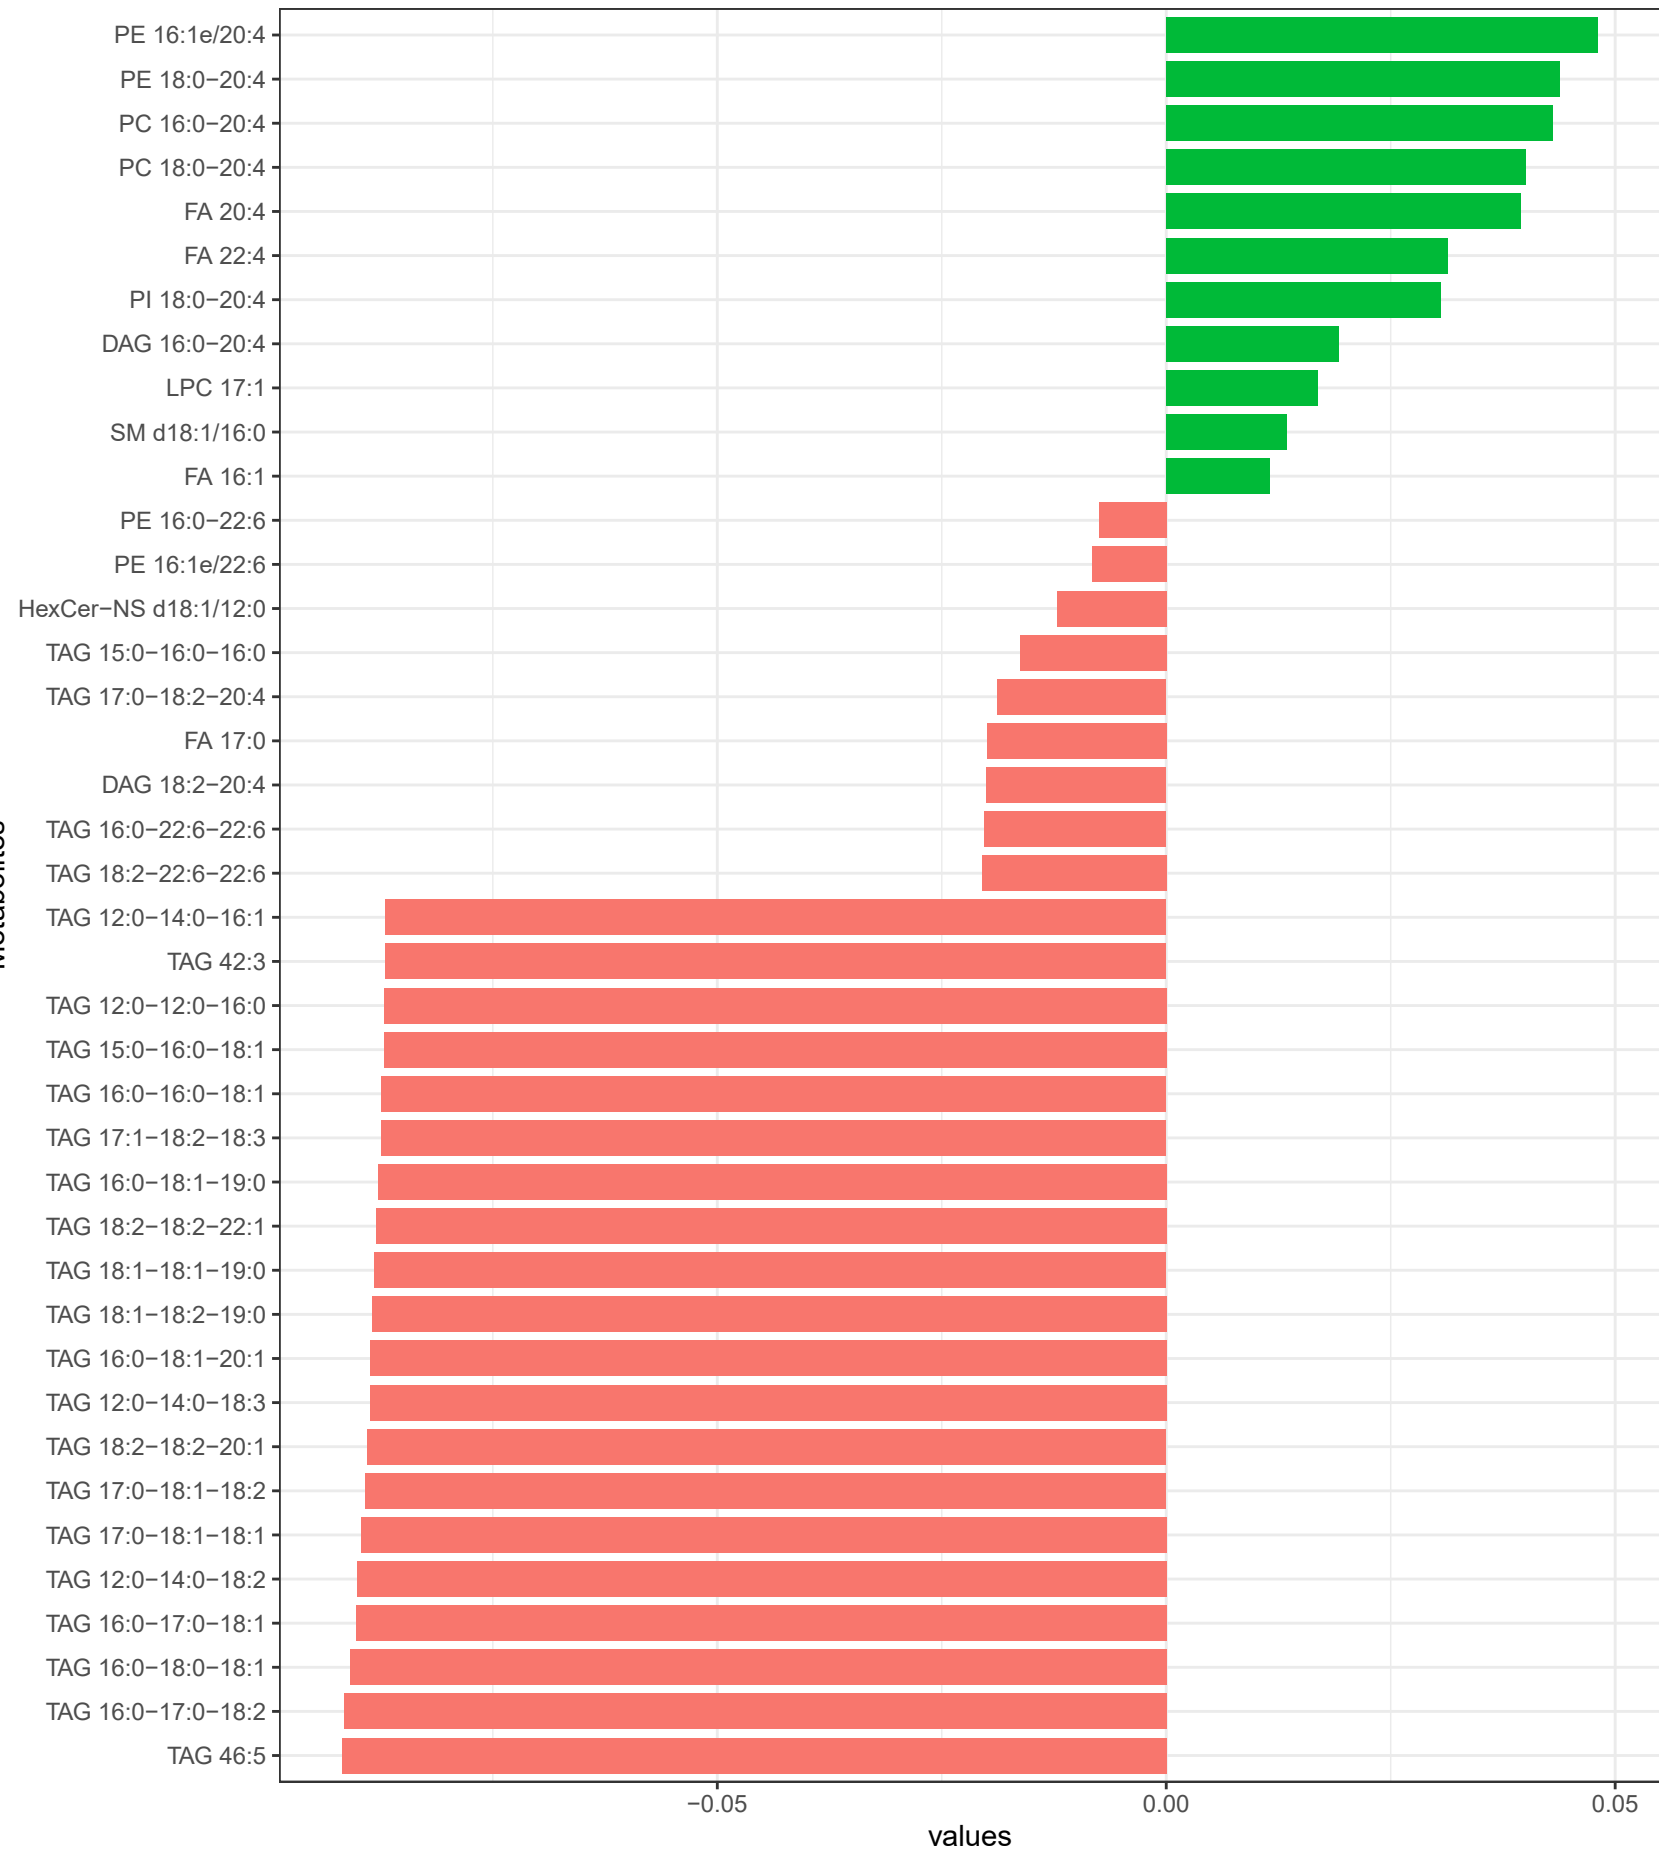

Untargeted: Adipose PC2 loading plot for Top20 from max/min values

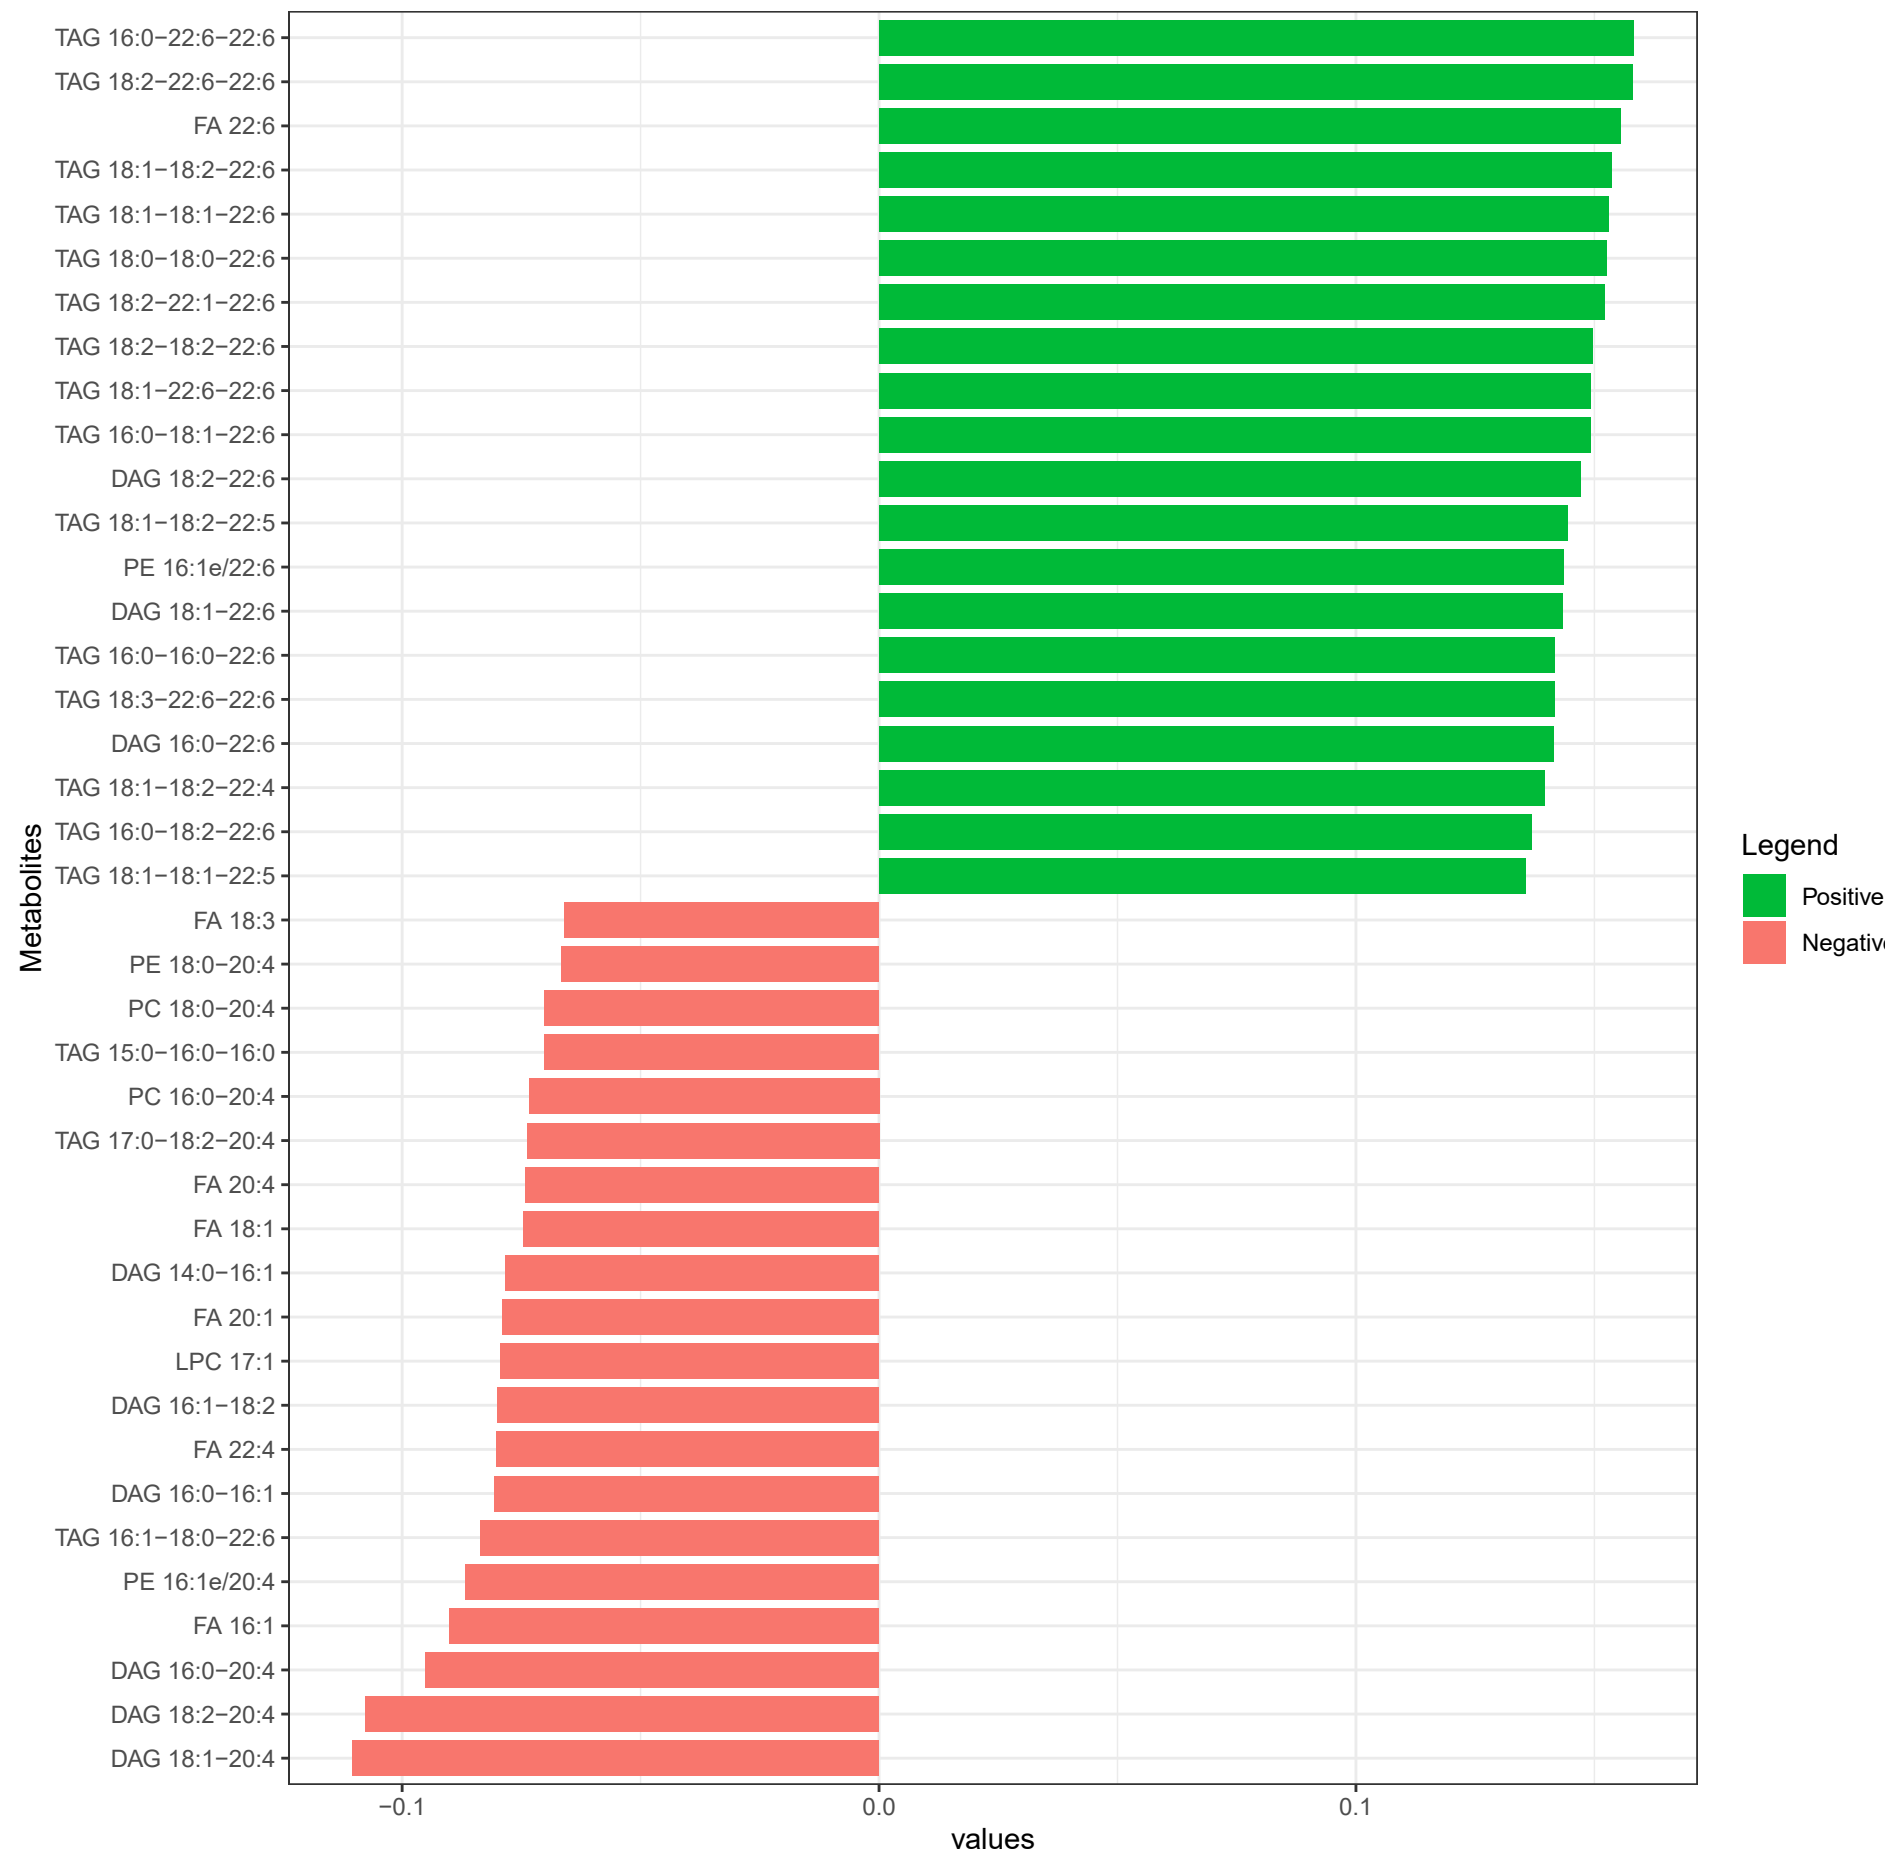



Untargeted: Heart PC1 loading plot for Top20 from max/min values

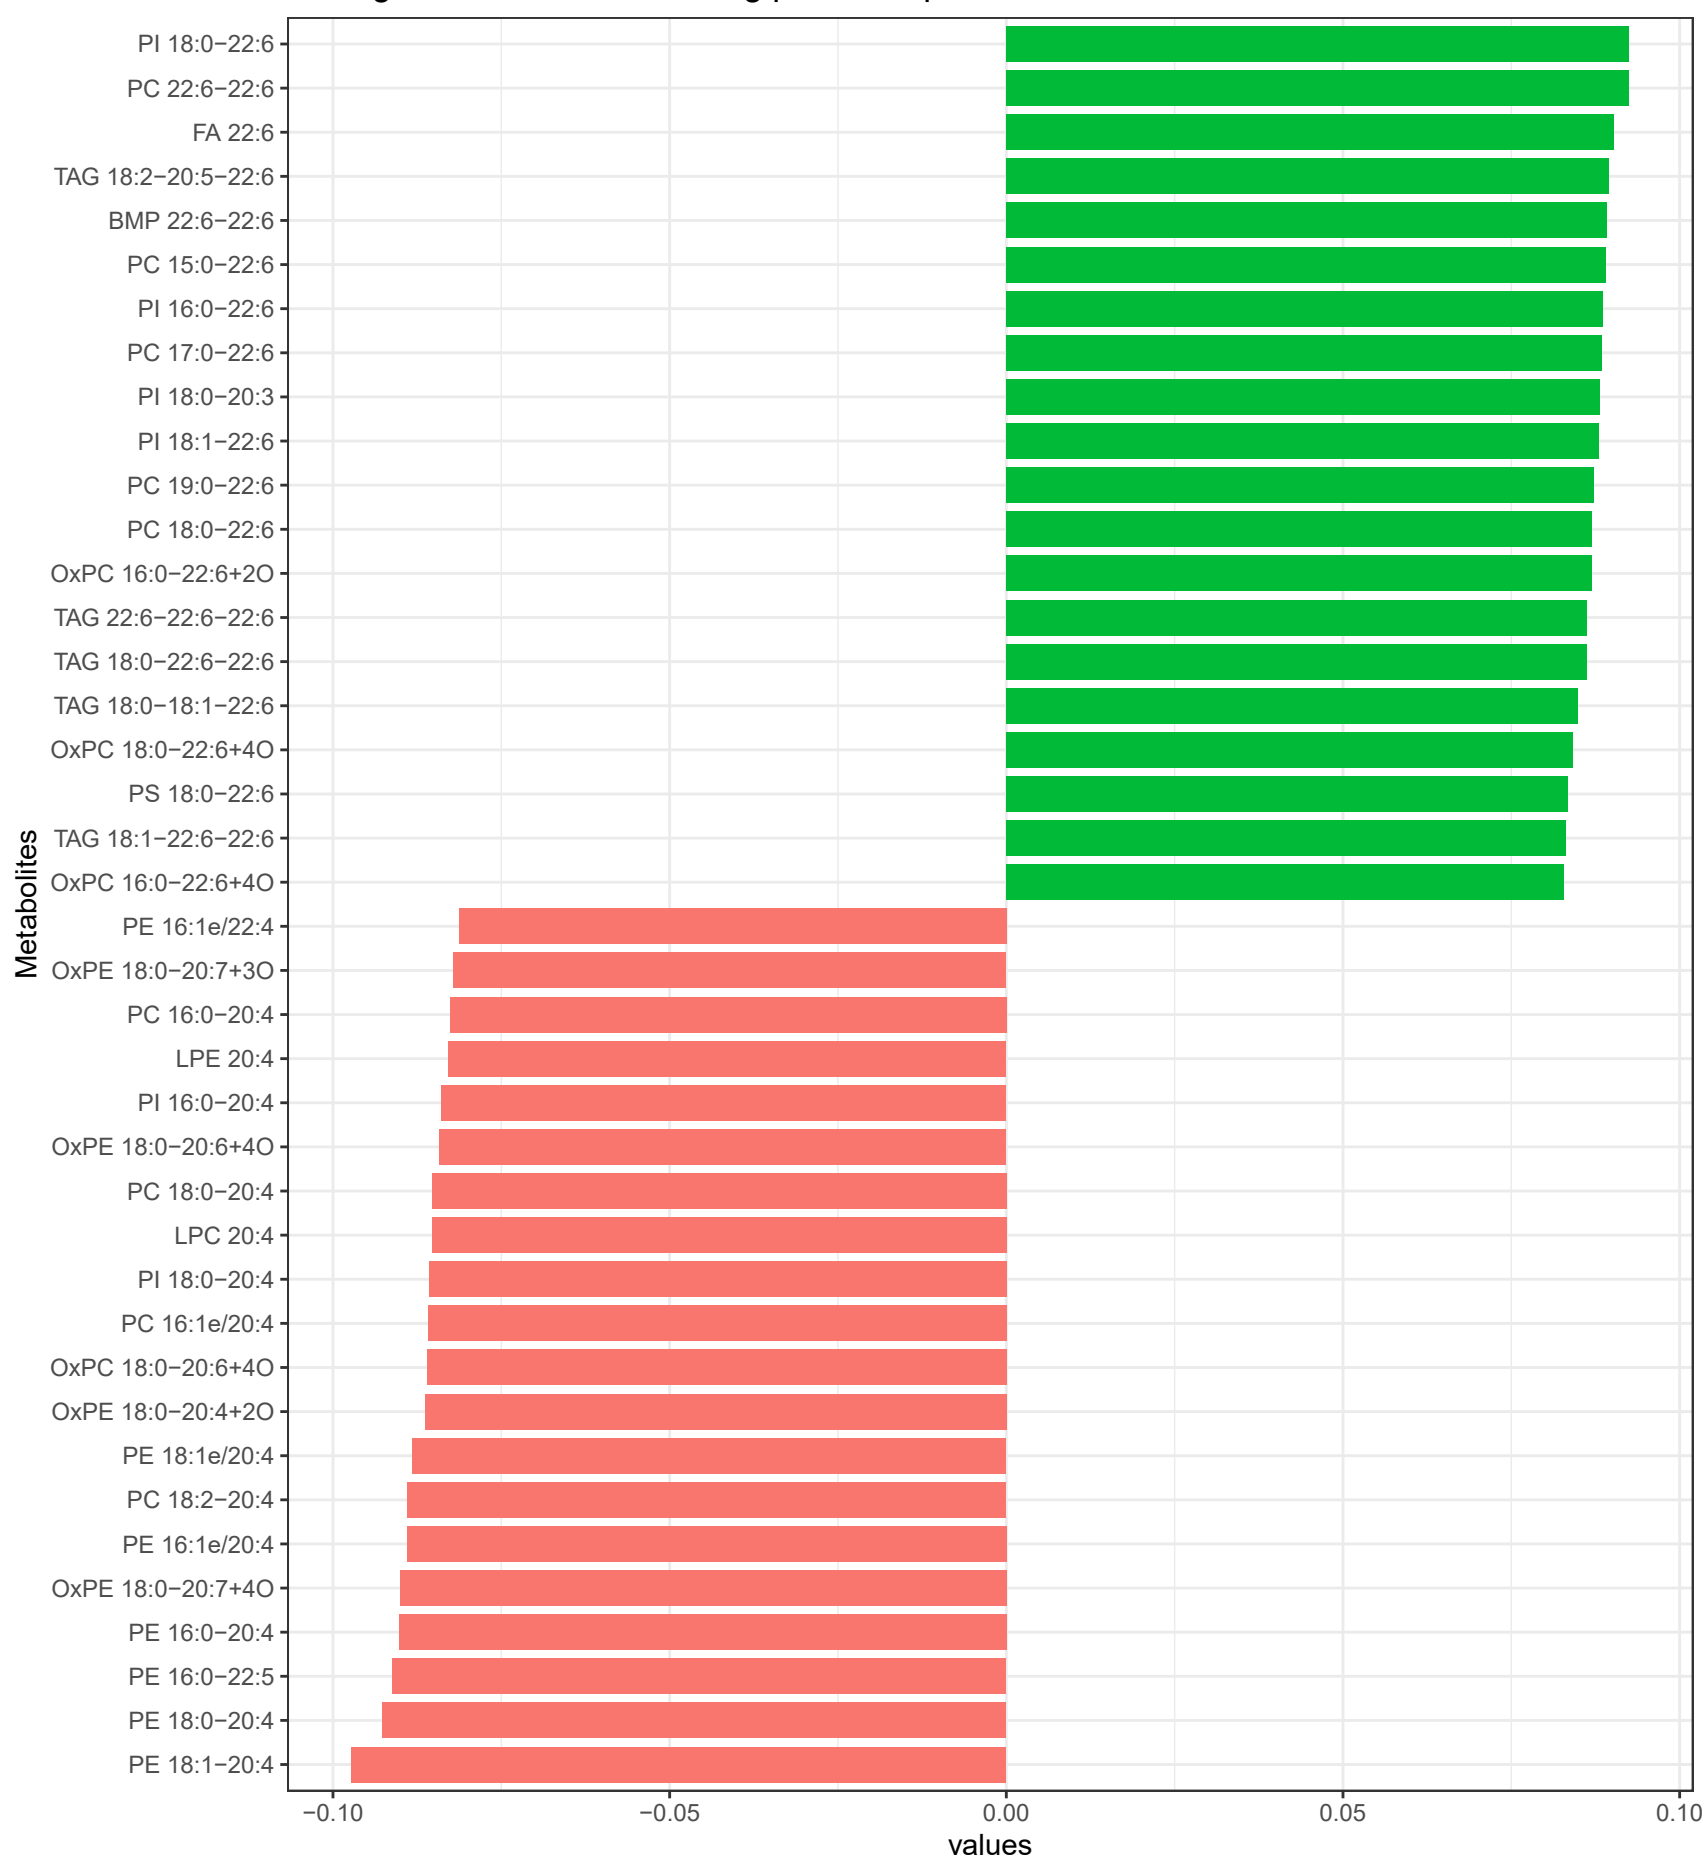

Untargeted: Heart PC2 loading plot for Top20 from max/min values

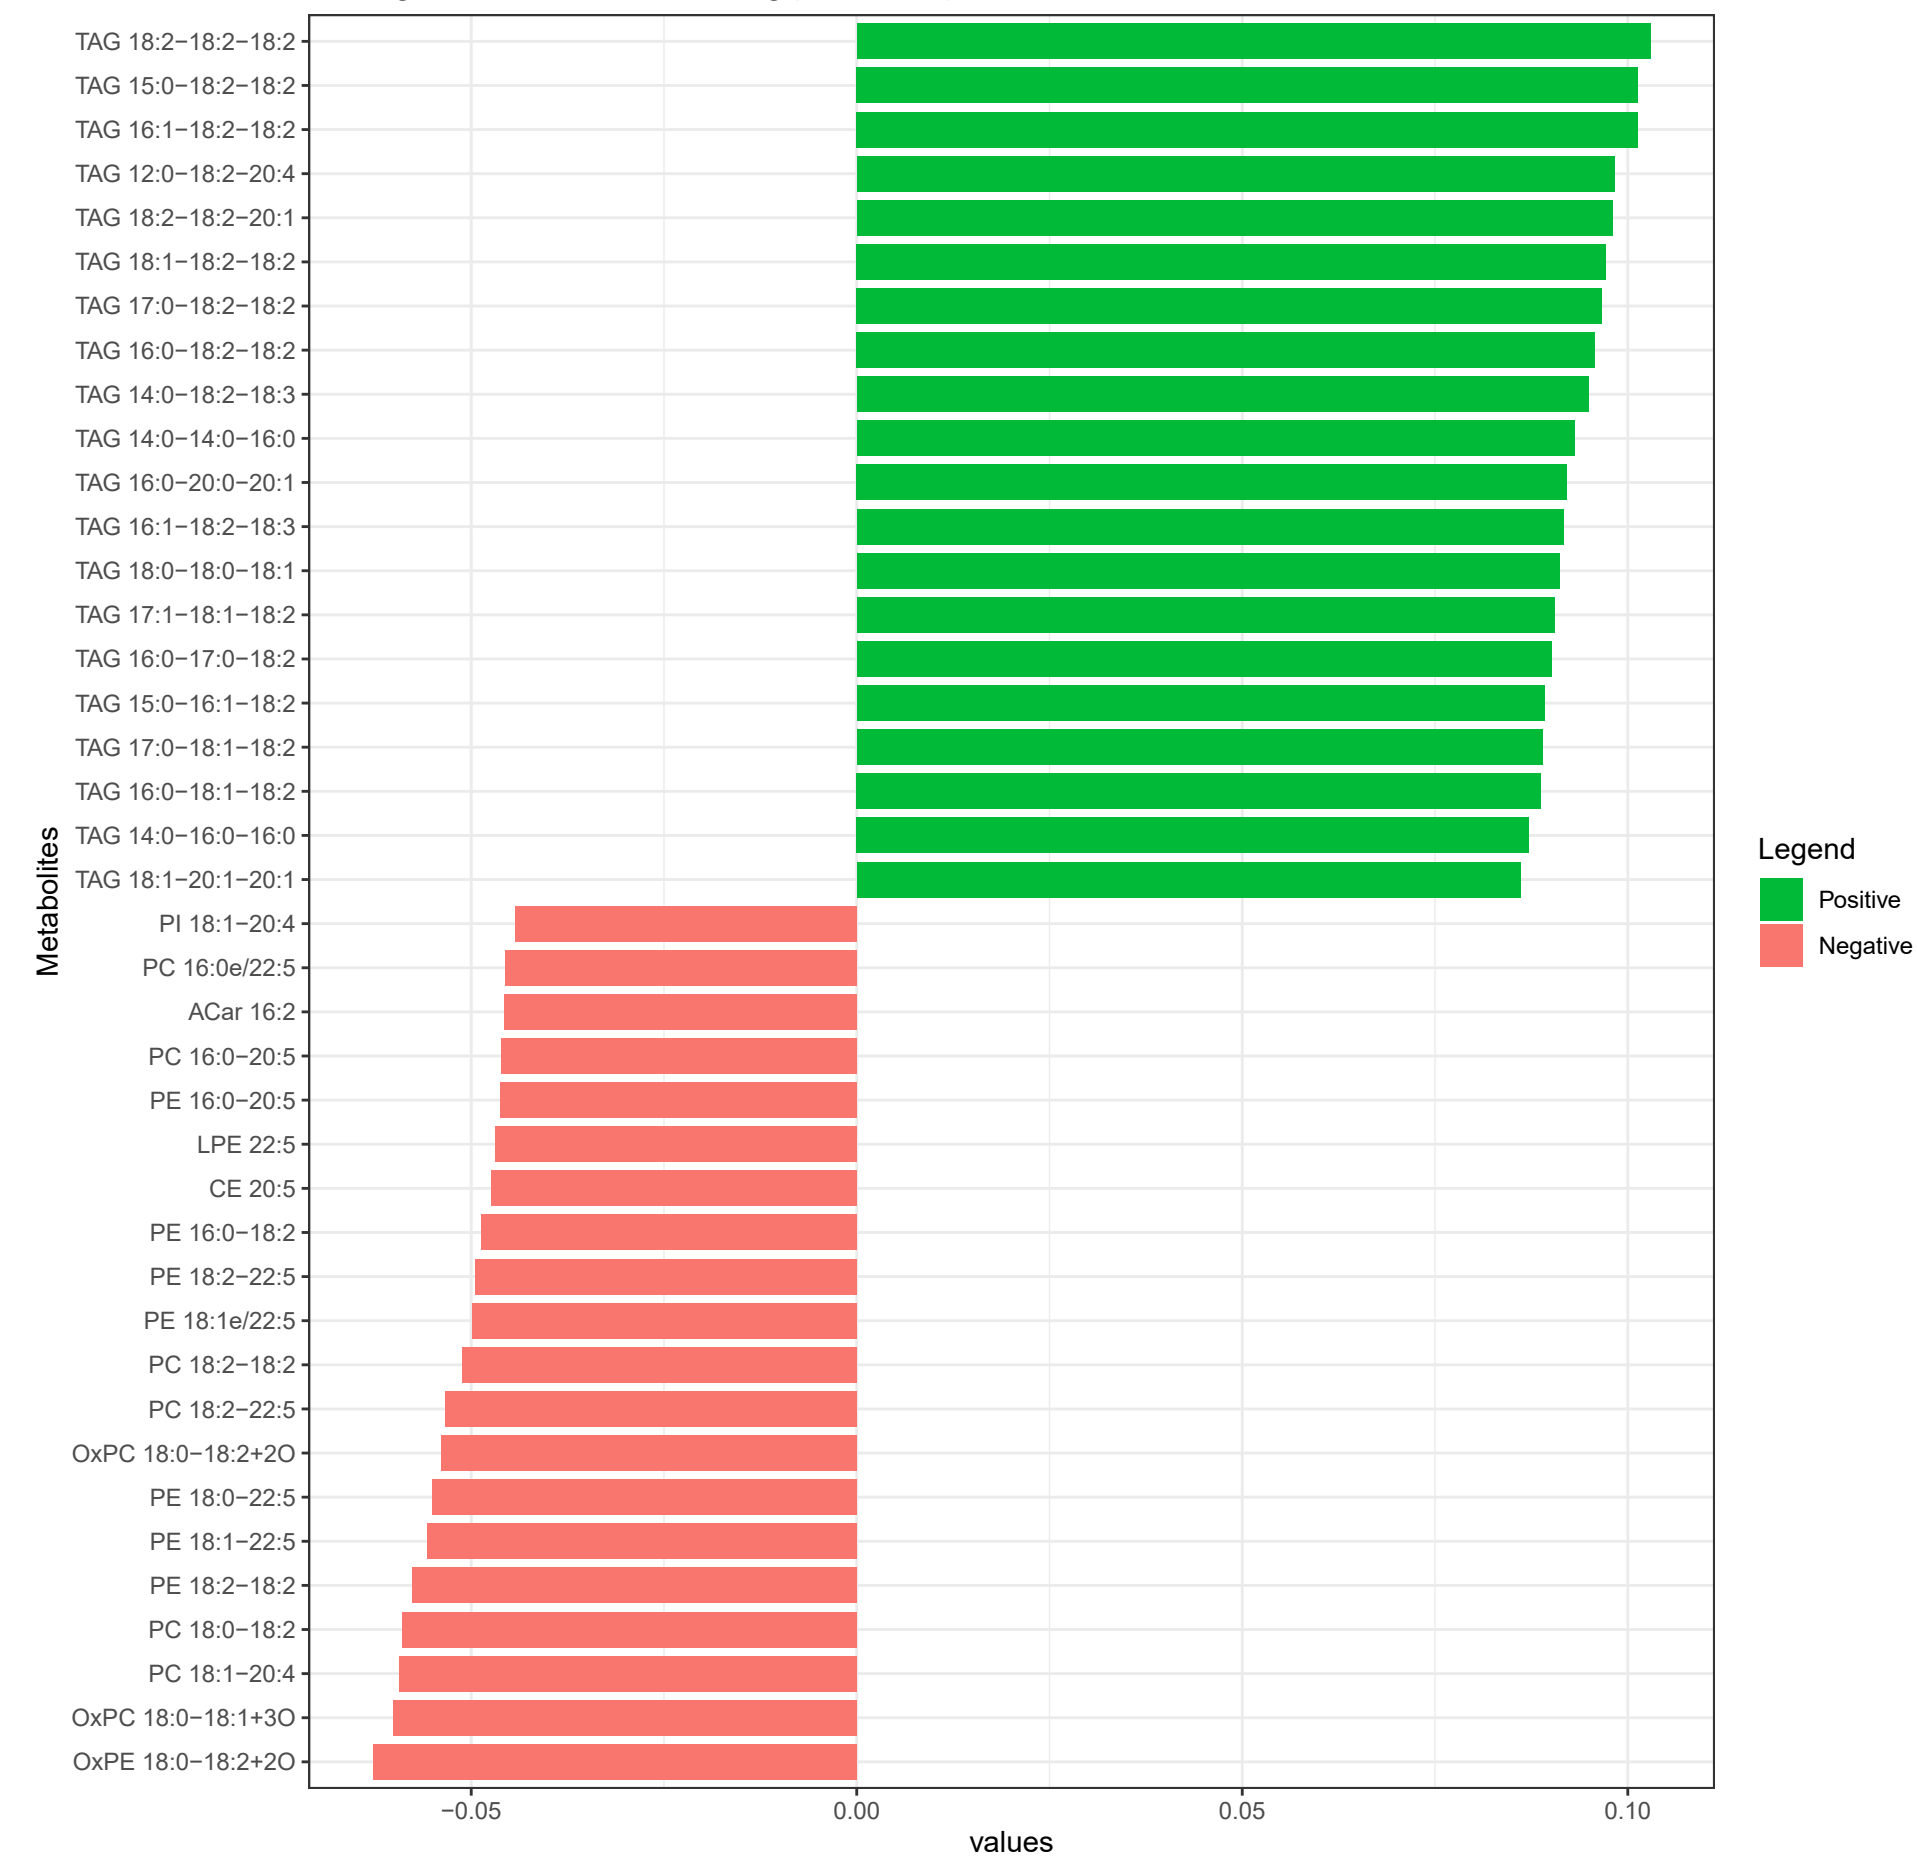

Untargeted: Brain PC1 loading plot for Top20 from max/min values

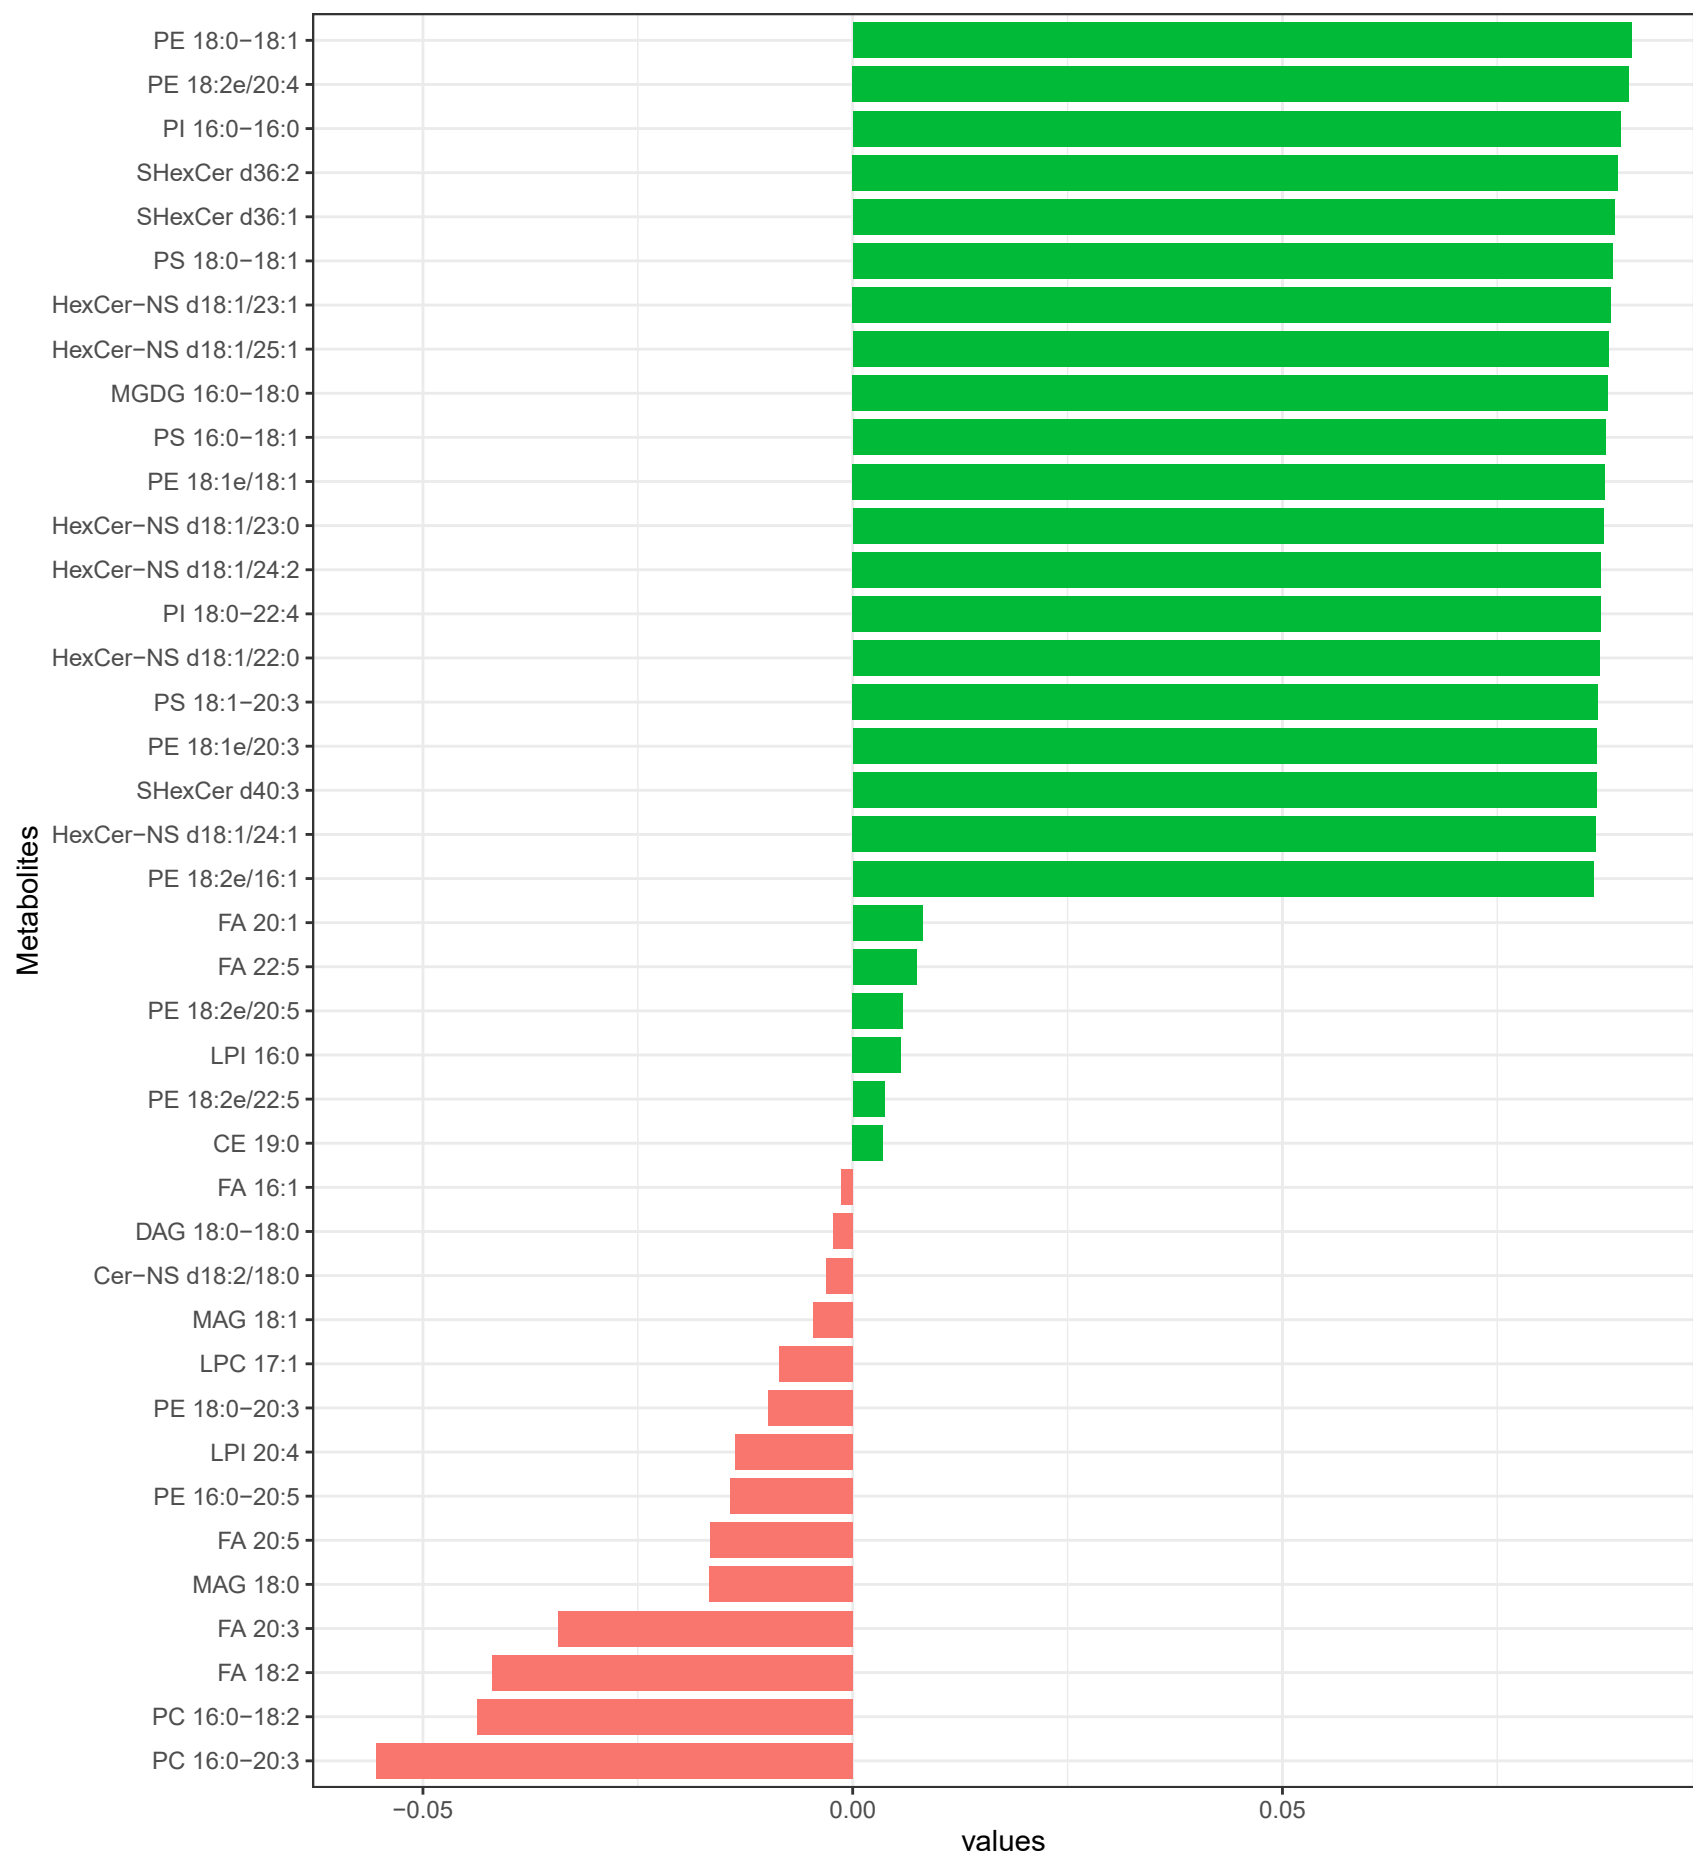

Untargeted: Brain PC2 loading plot for Top20 from max/min values

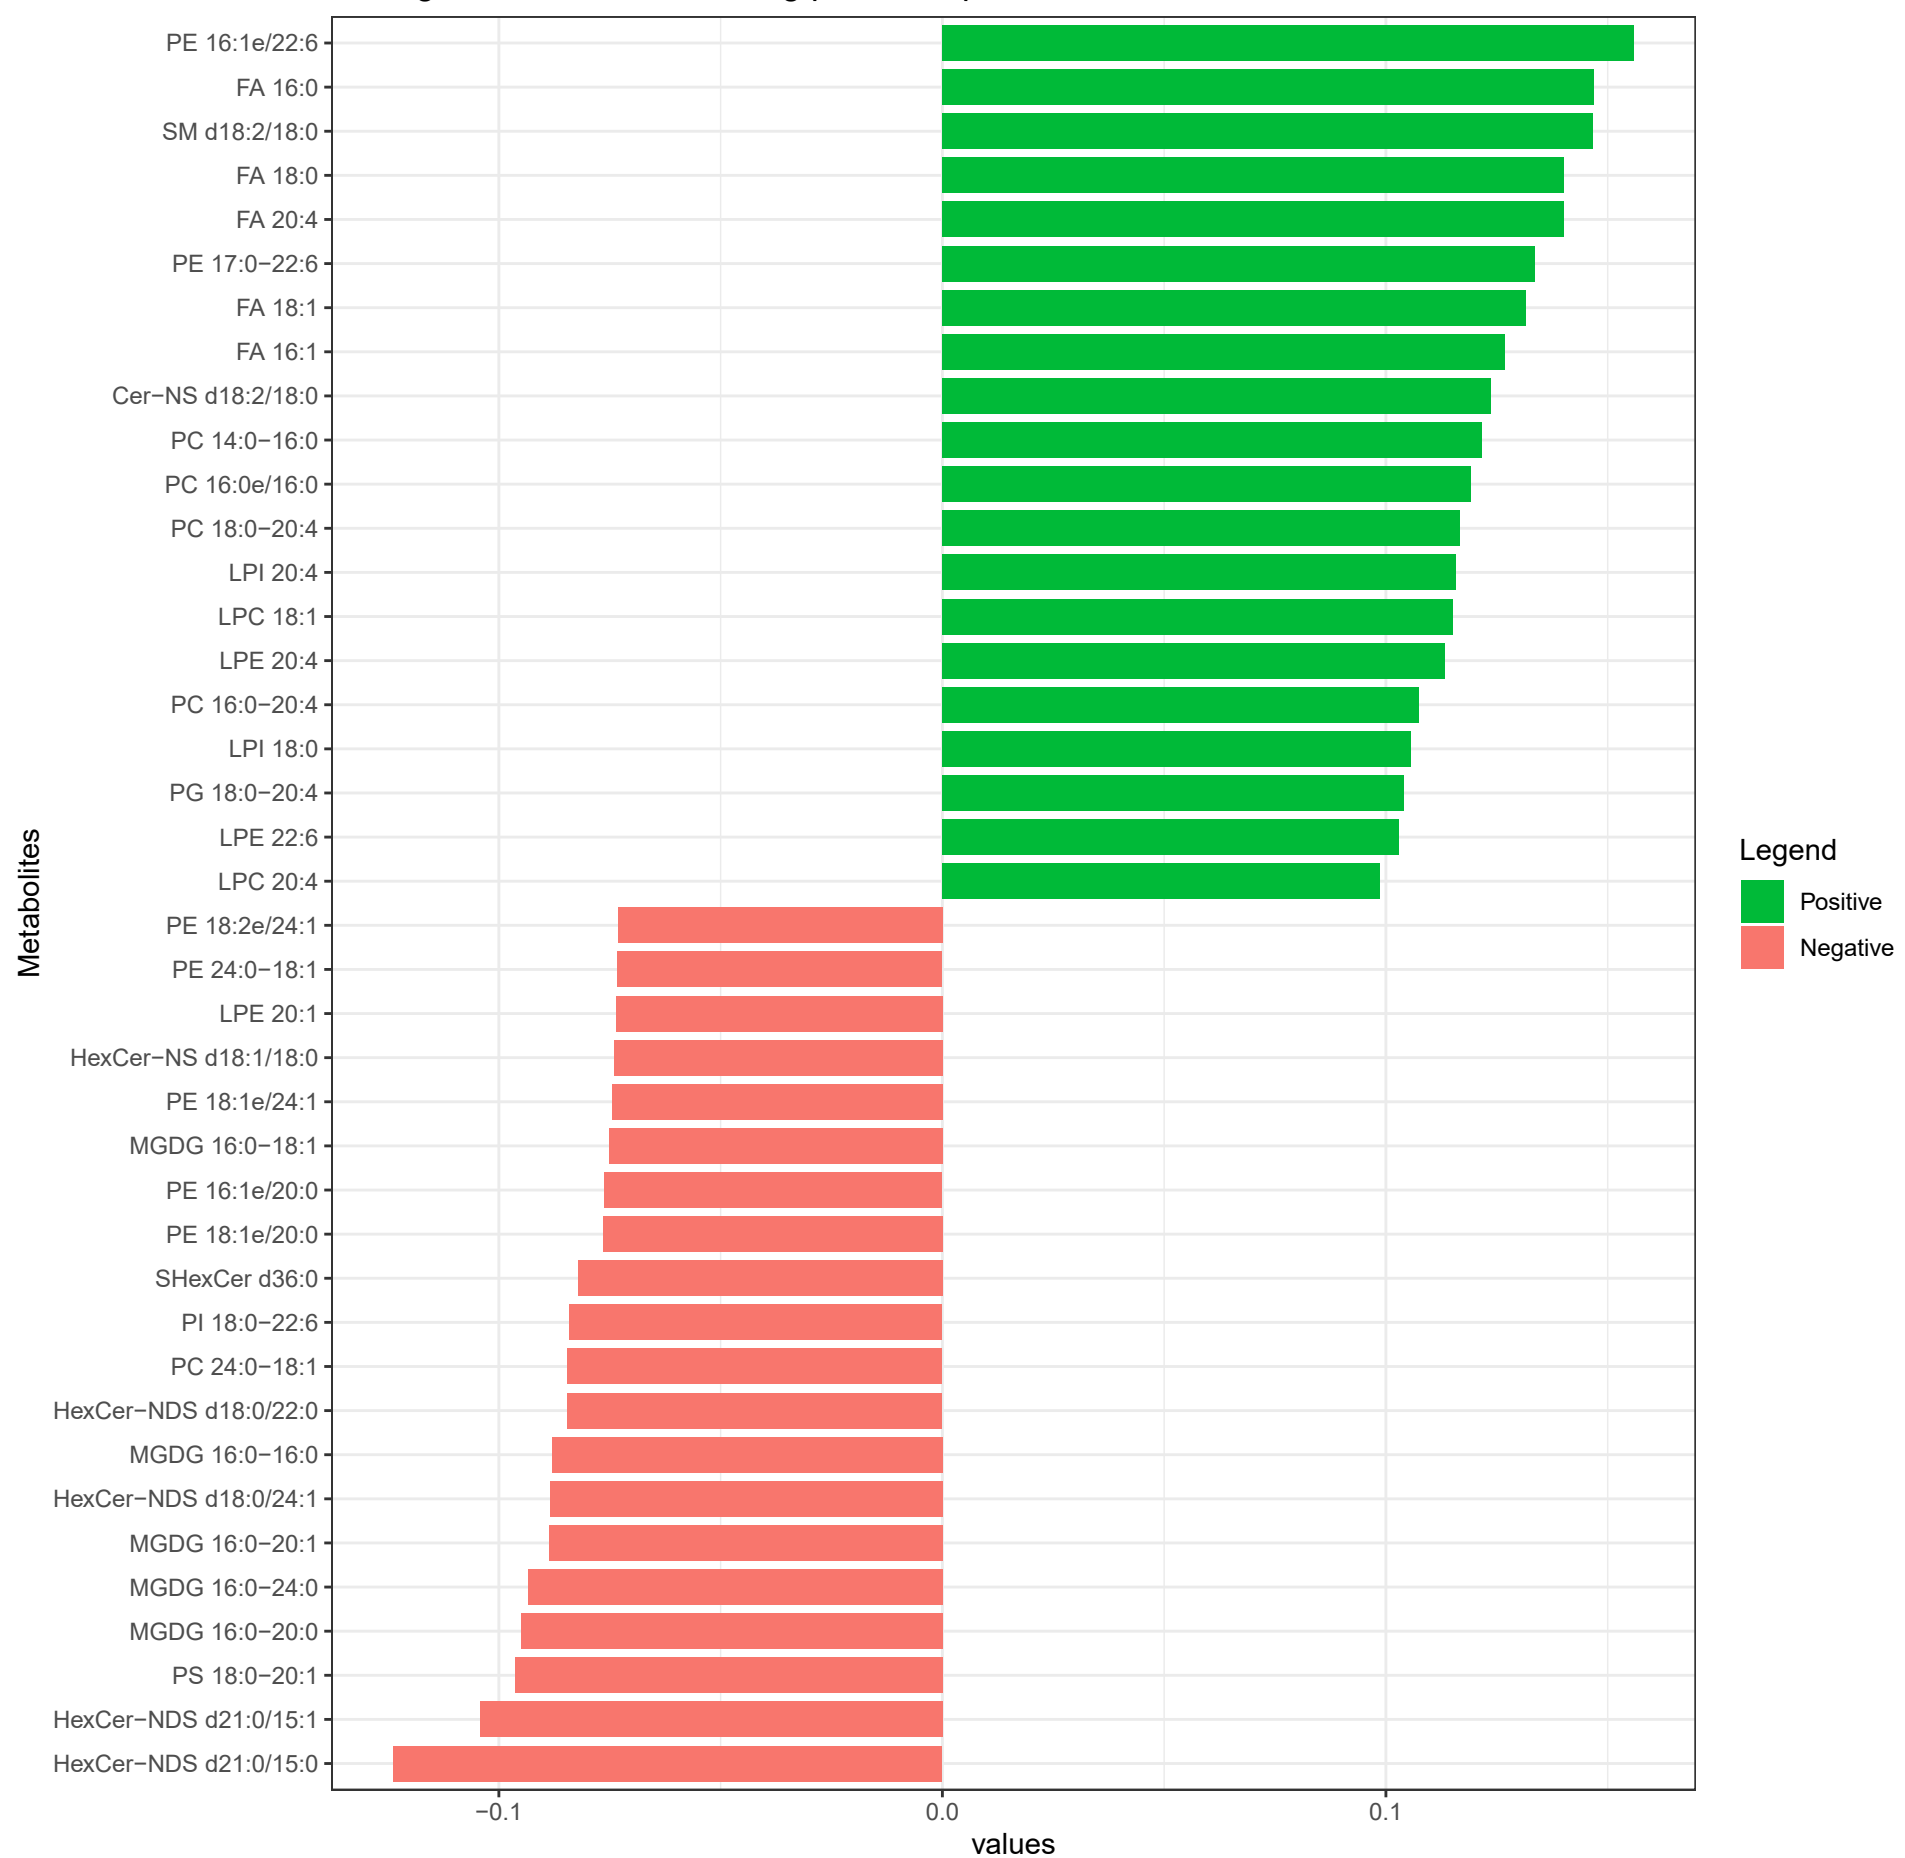

Targeted: Liver PC1 loading plot for Top20 from max/min values

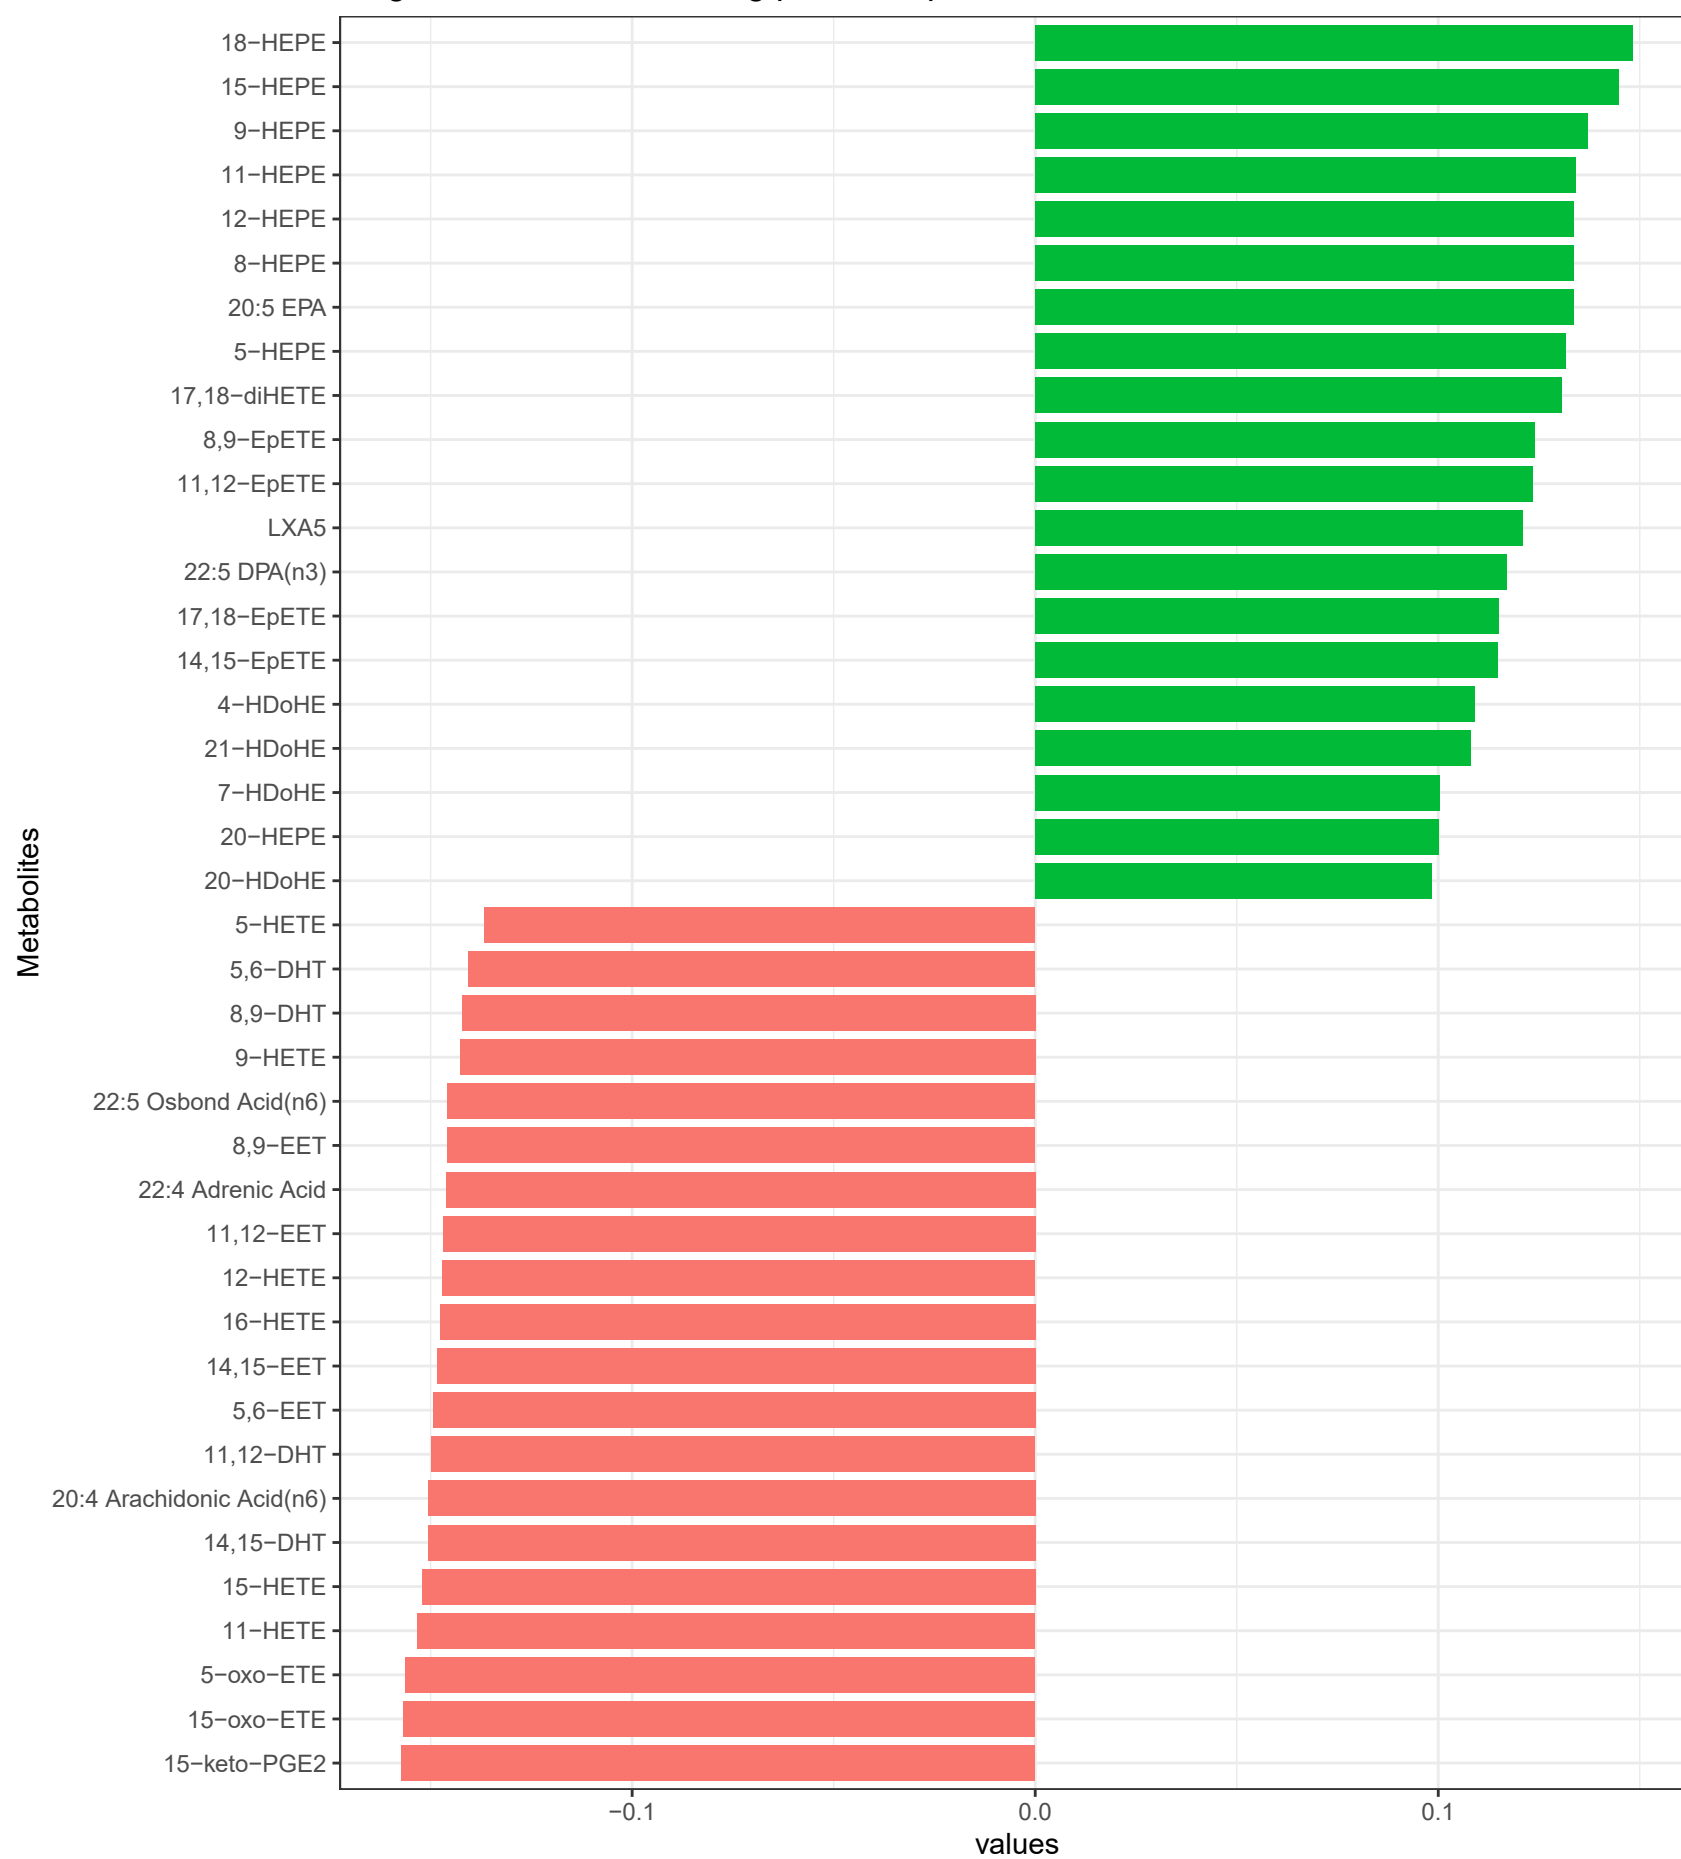

Targeted: Liver PC2 loading plot for Top20 from max/min values

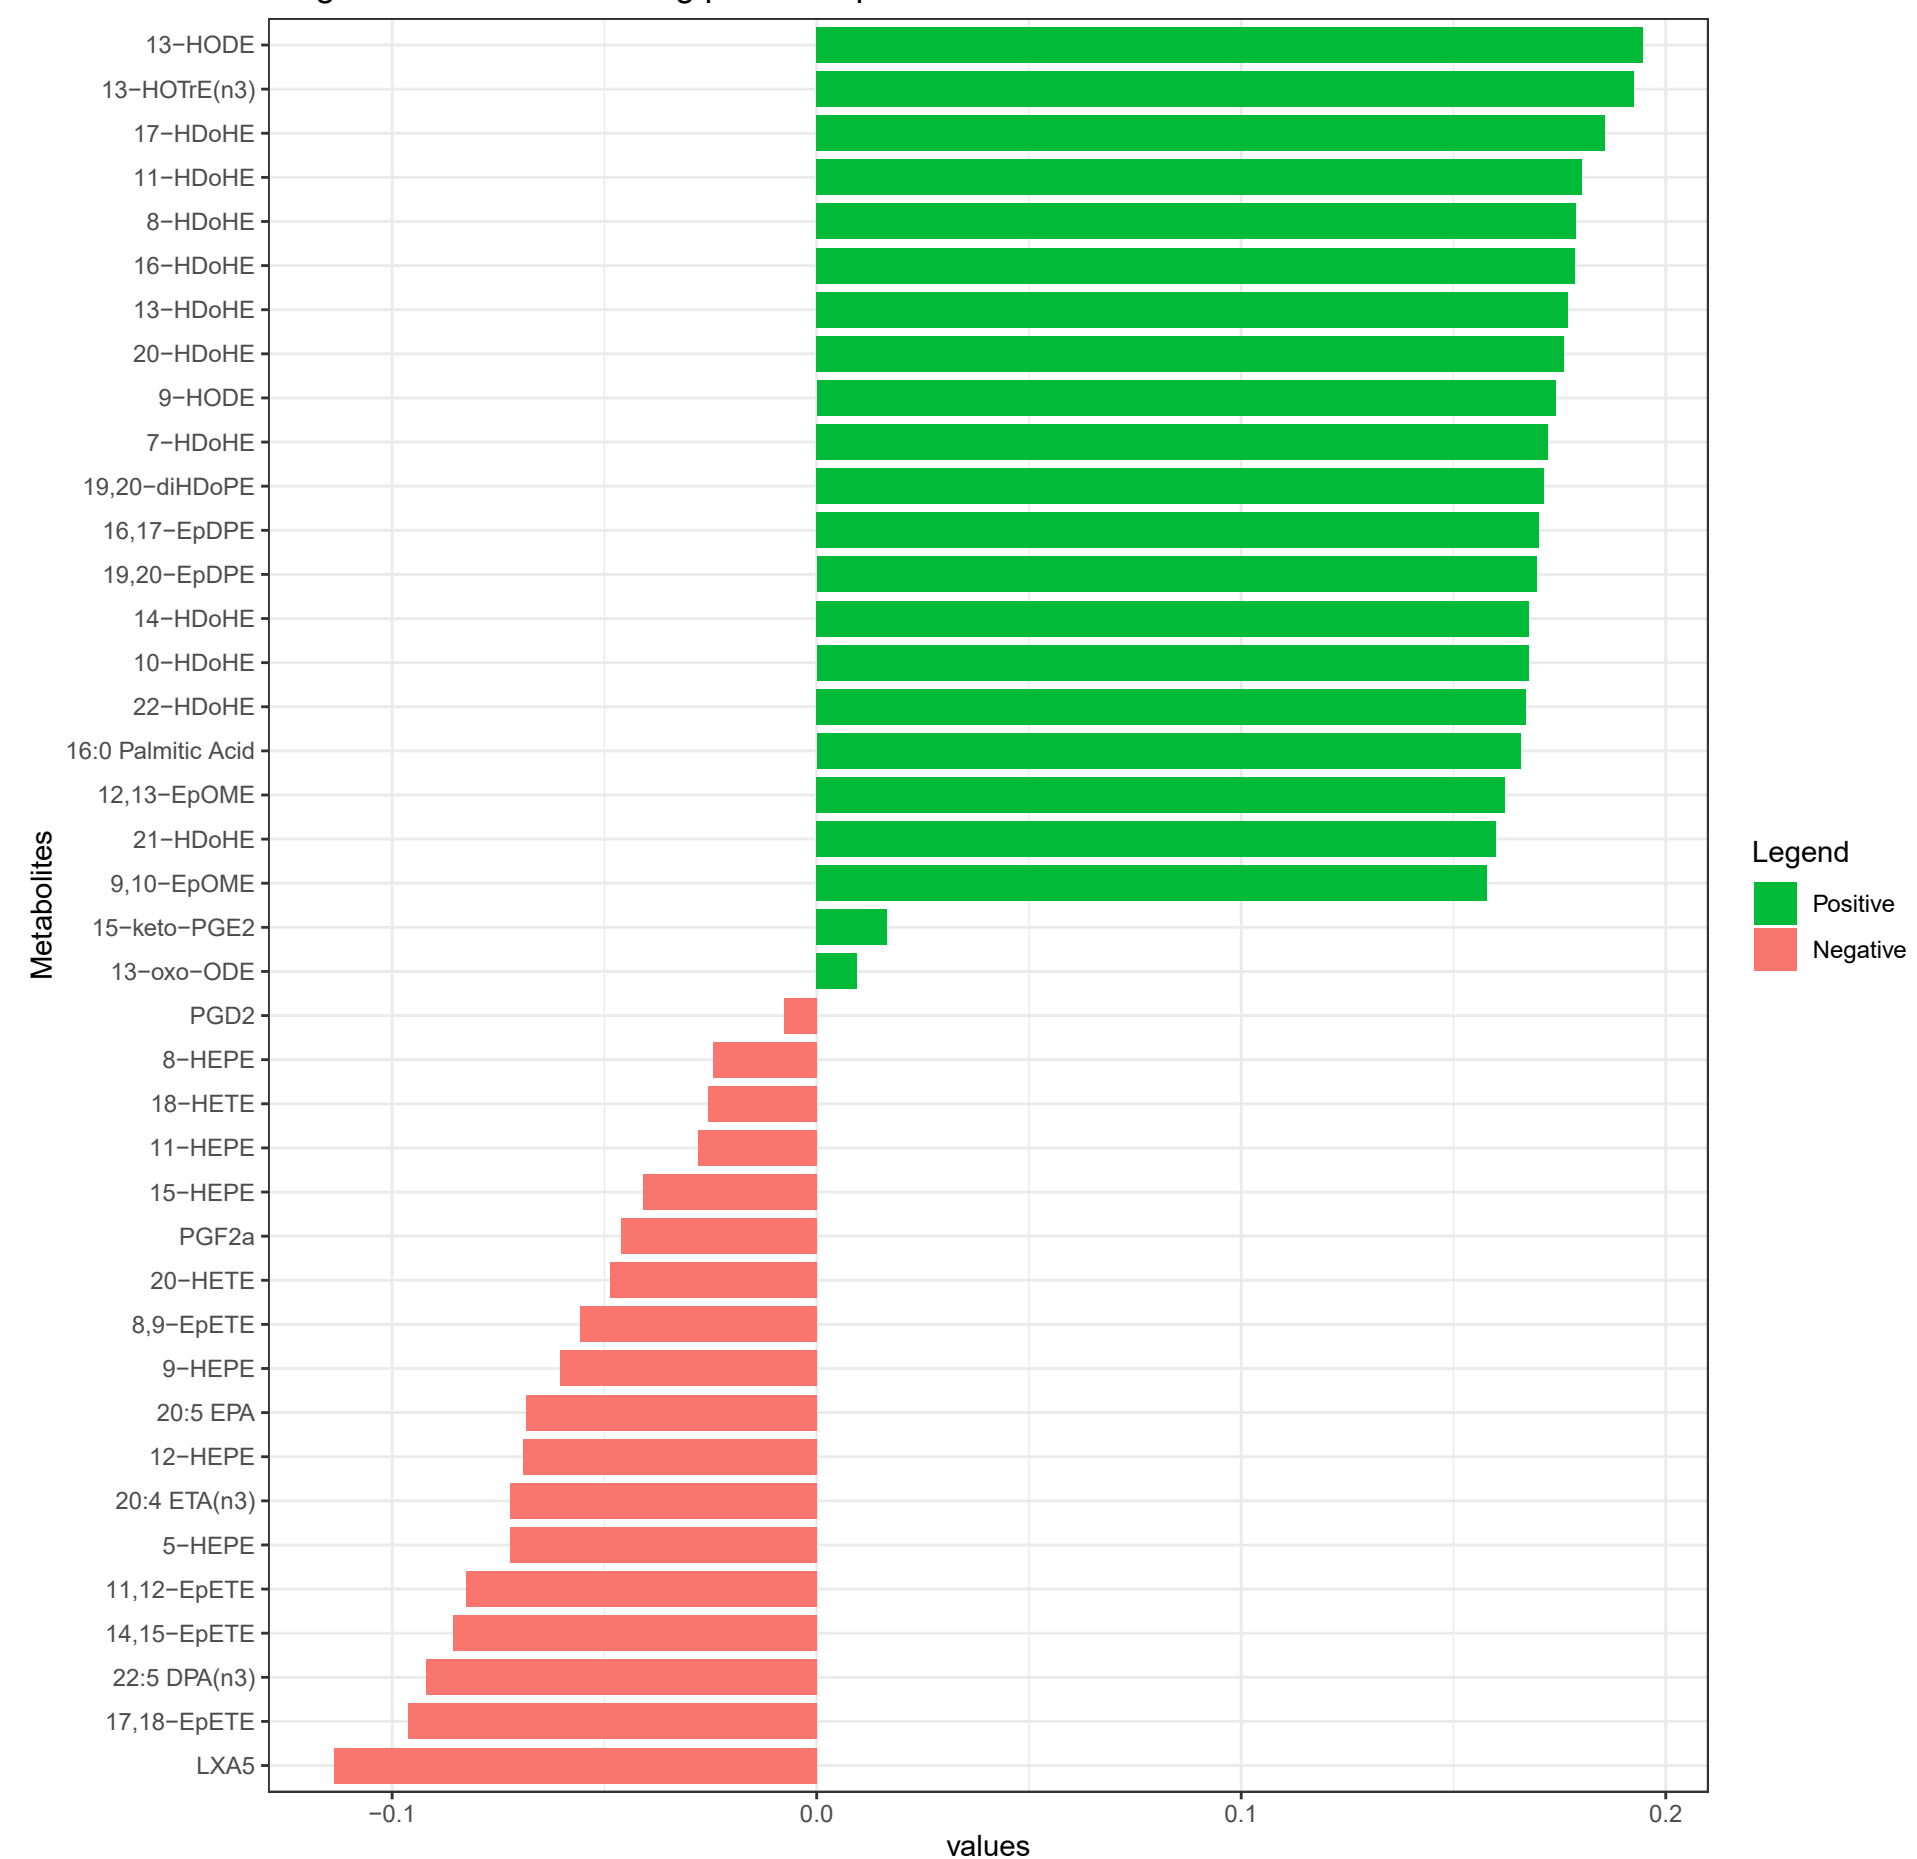

Targeted: Plasma PC1 loading plot for Top20 from max/min values

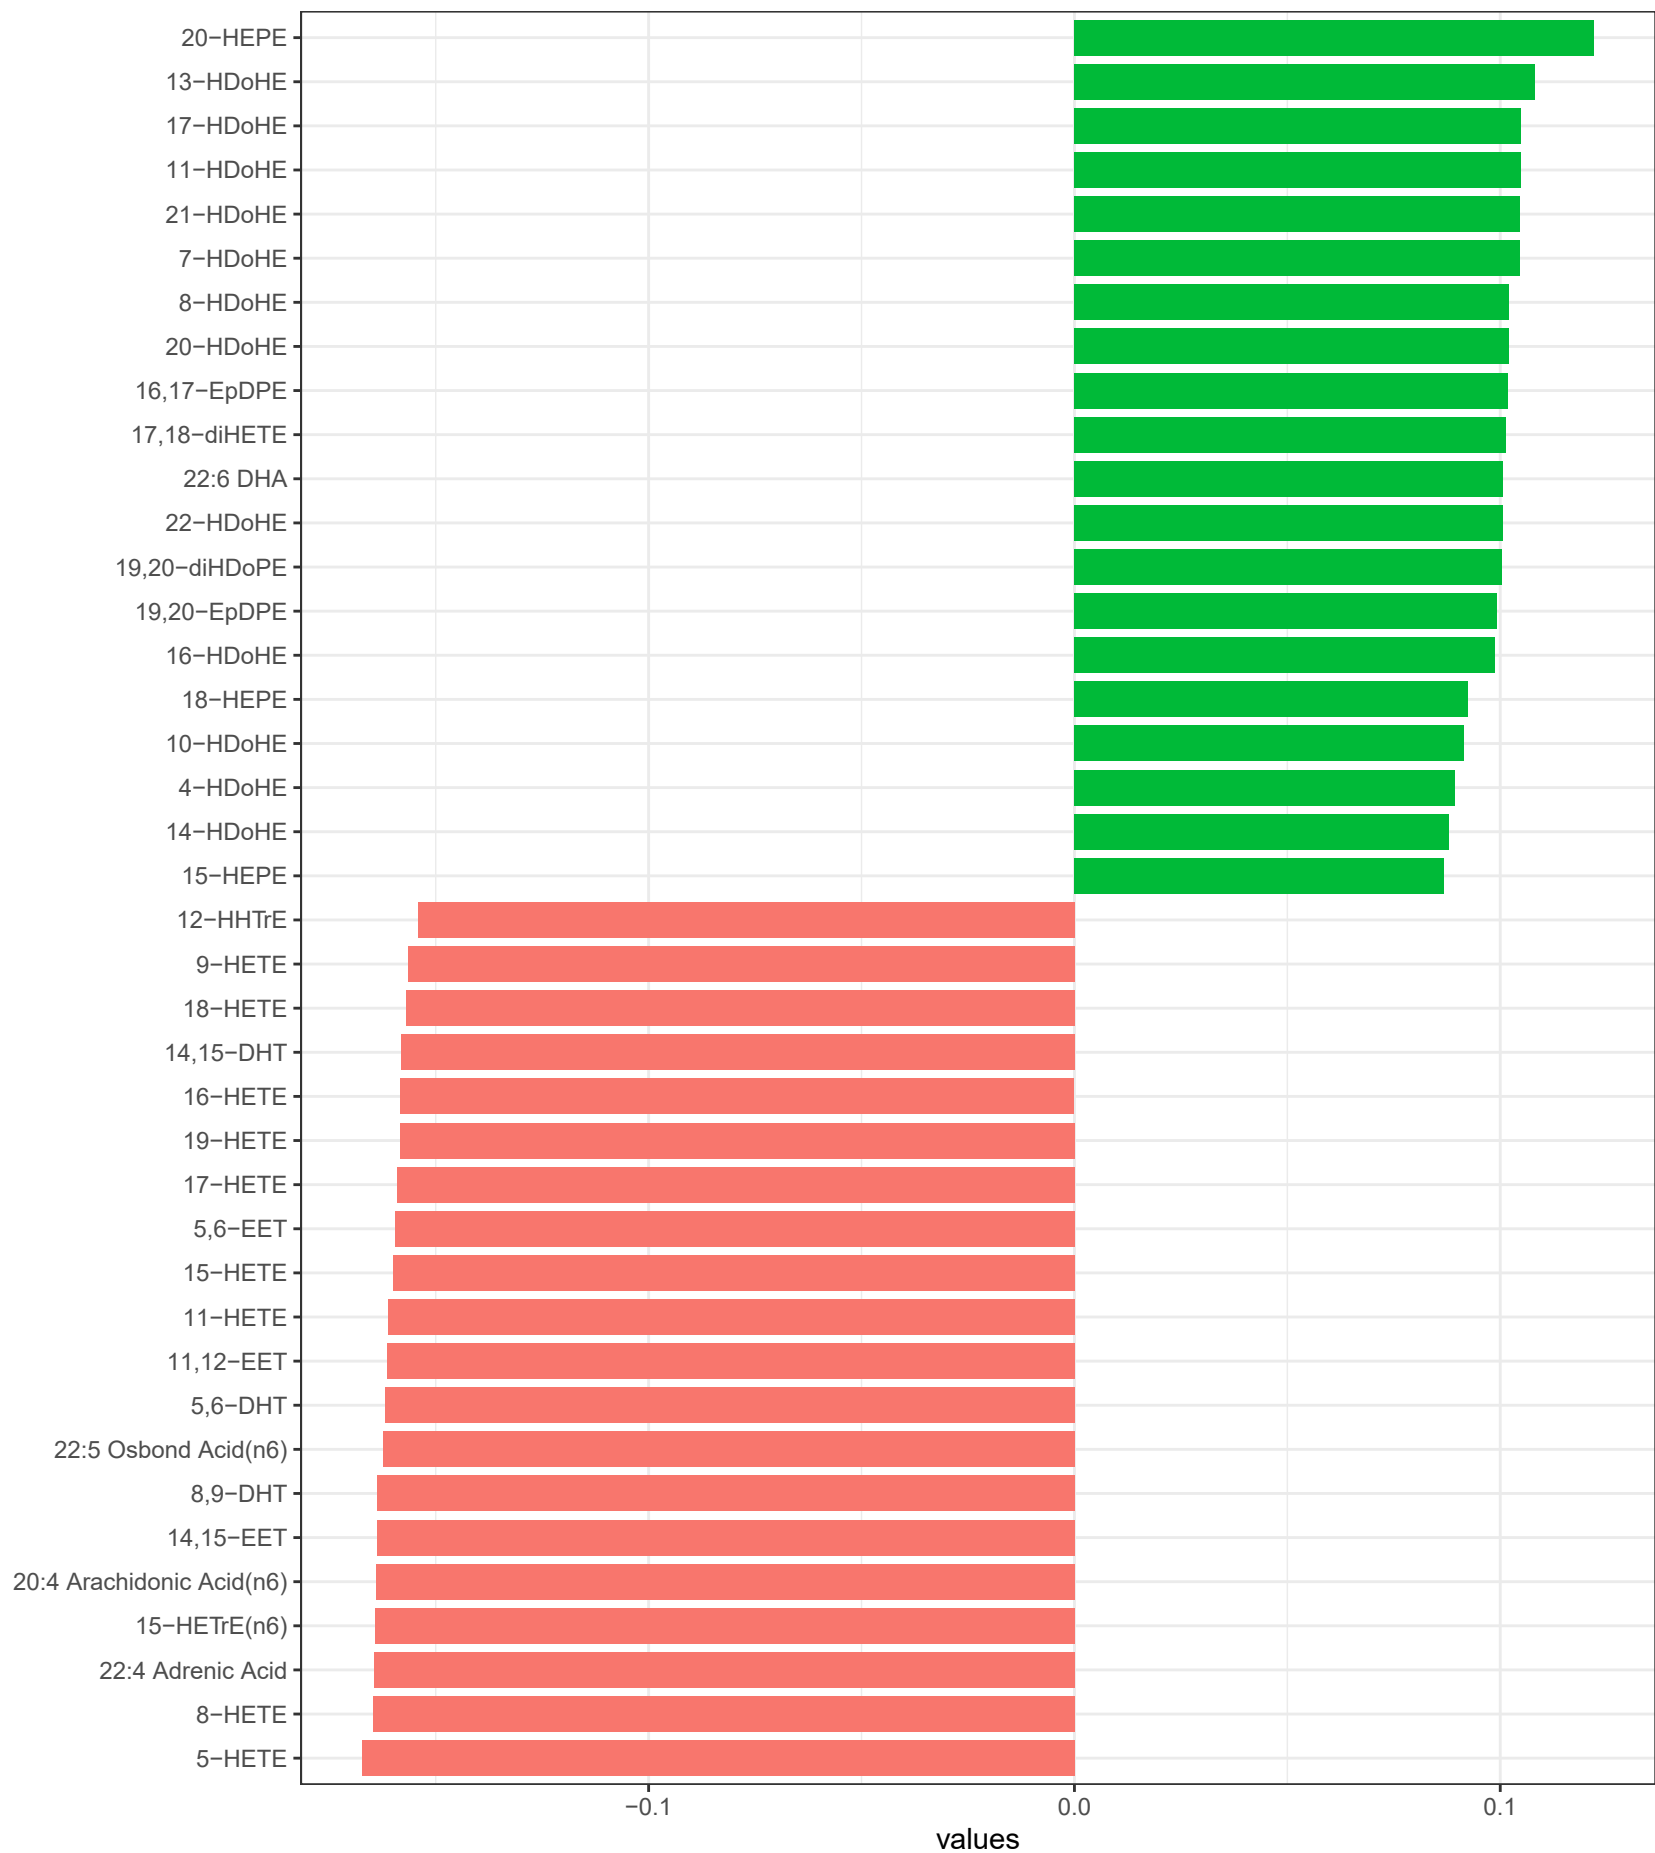

Targeted: Plasma PC2 loading plot for Top20 from max/min values

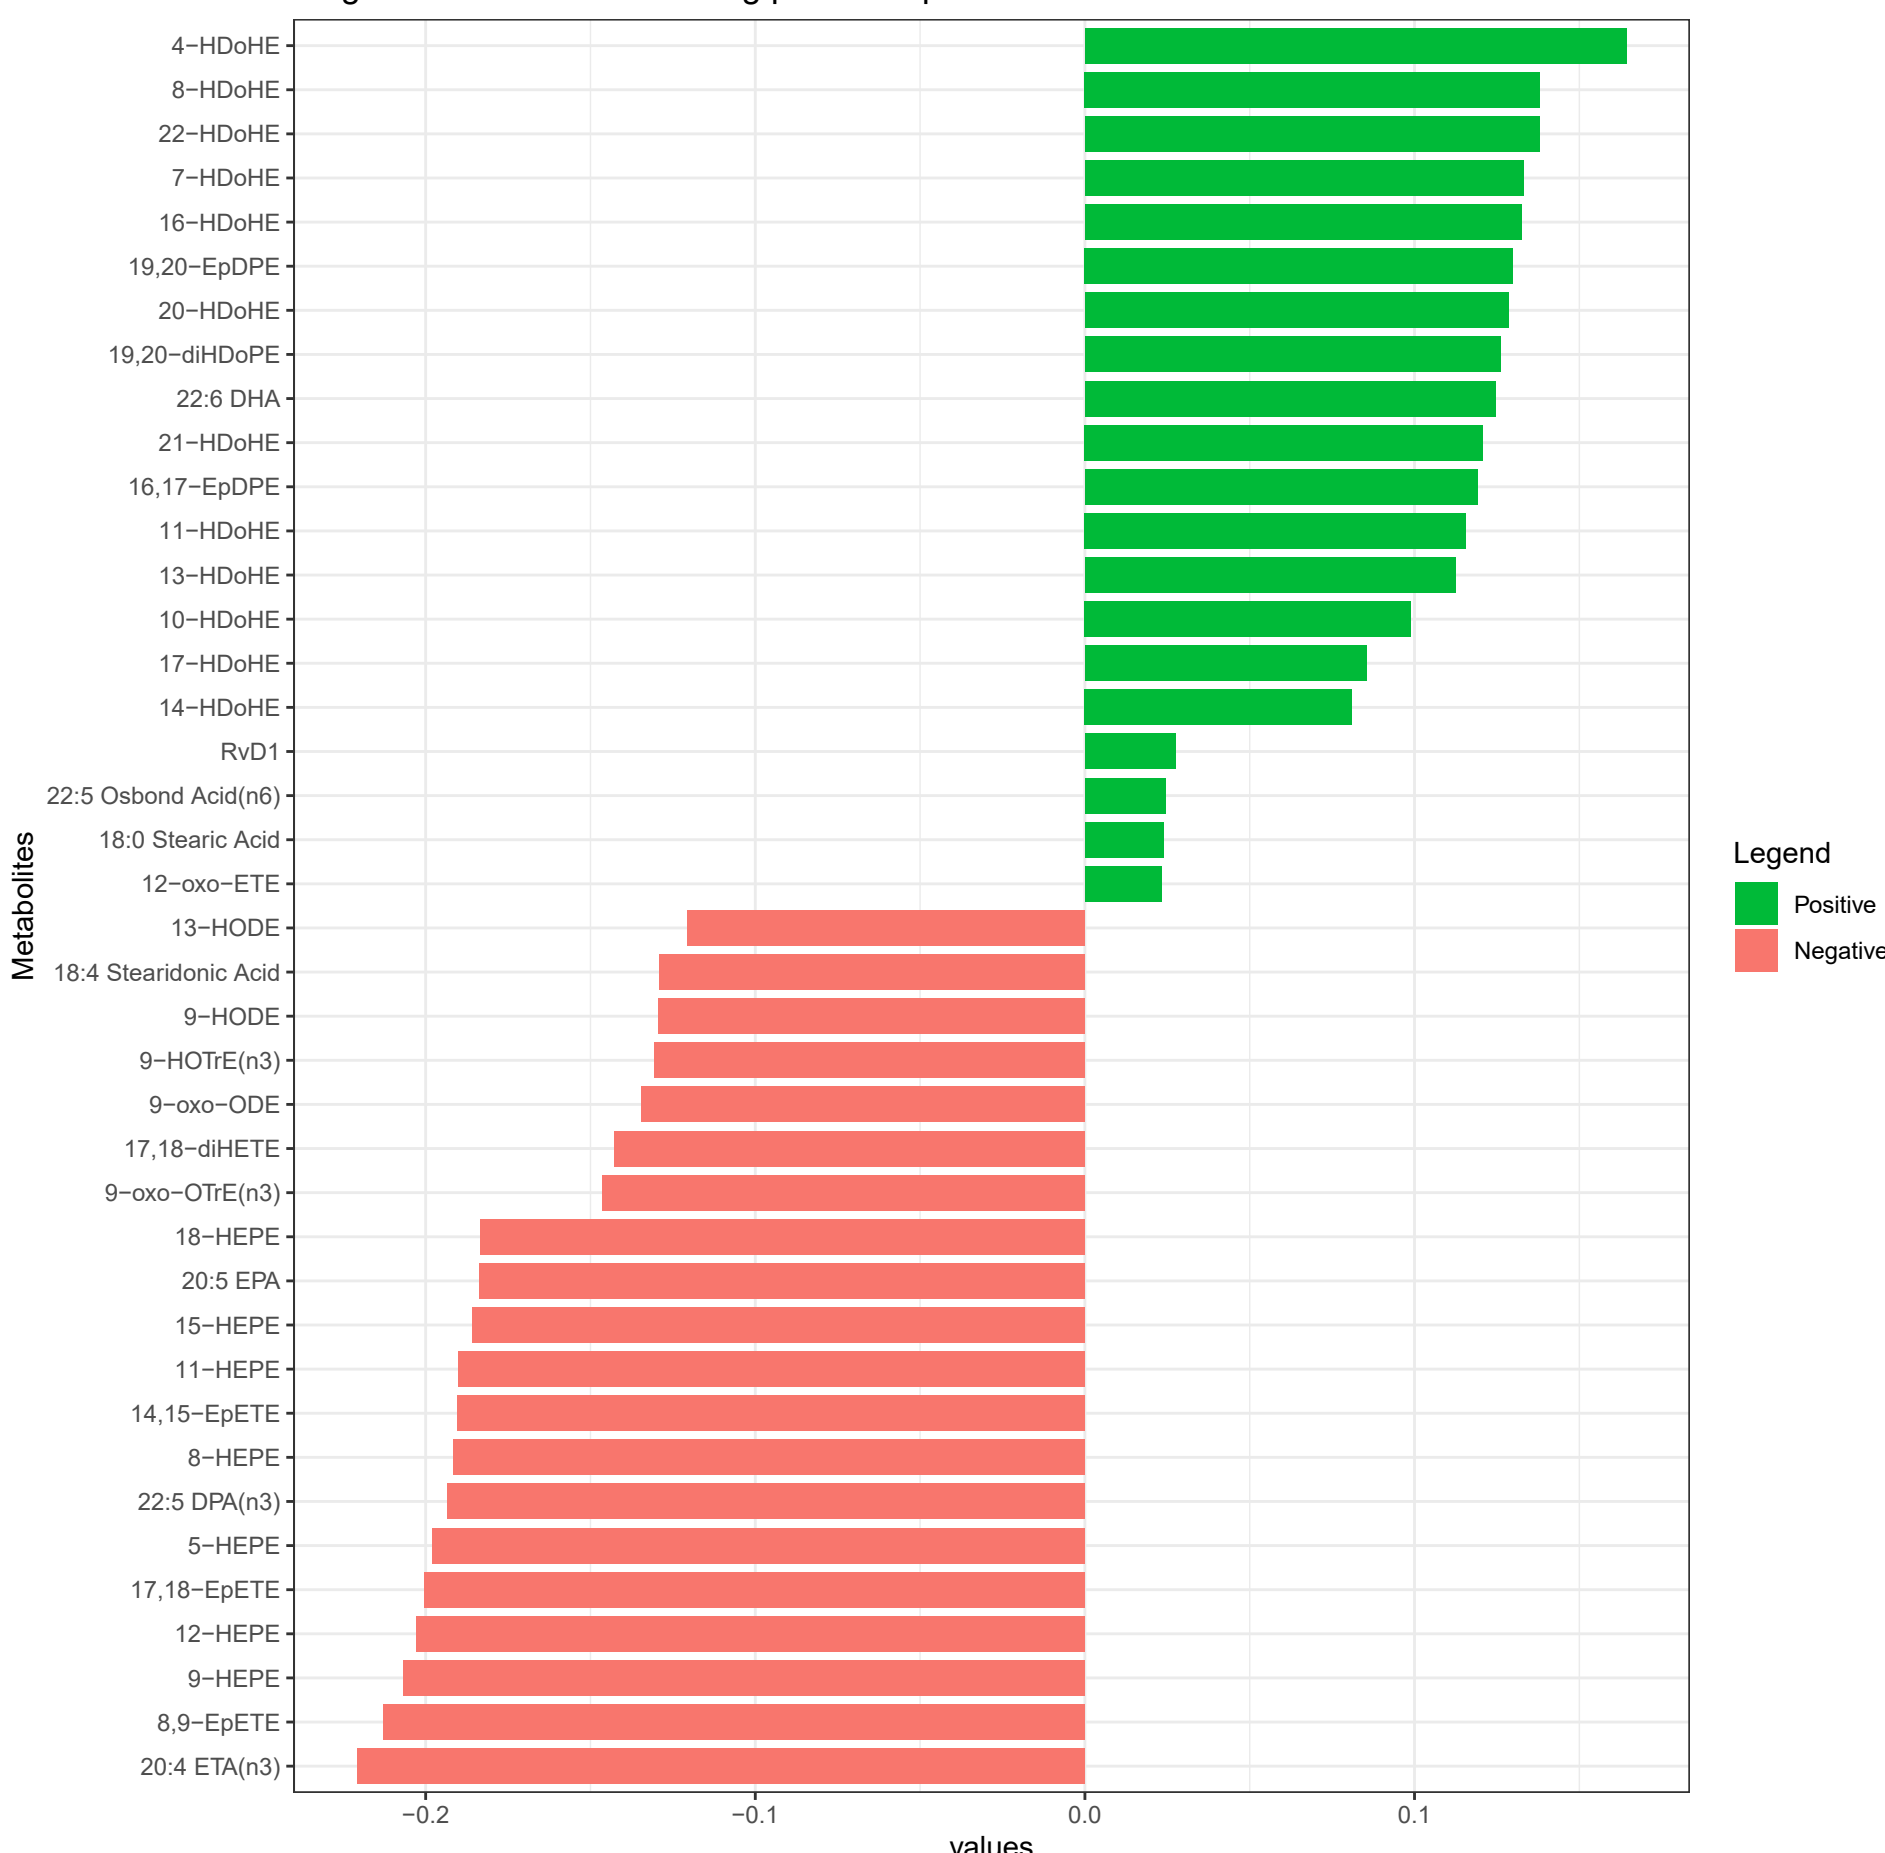

Targeted: Kidney PC1 loading plot for Top20 from max/min values

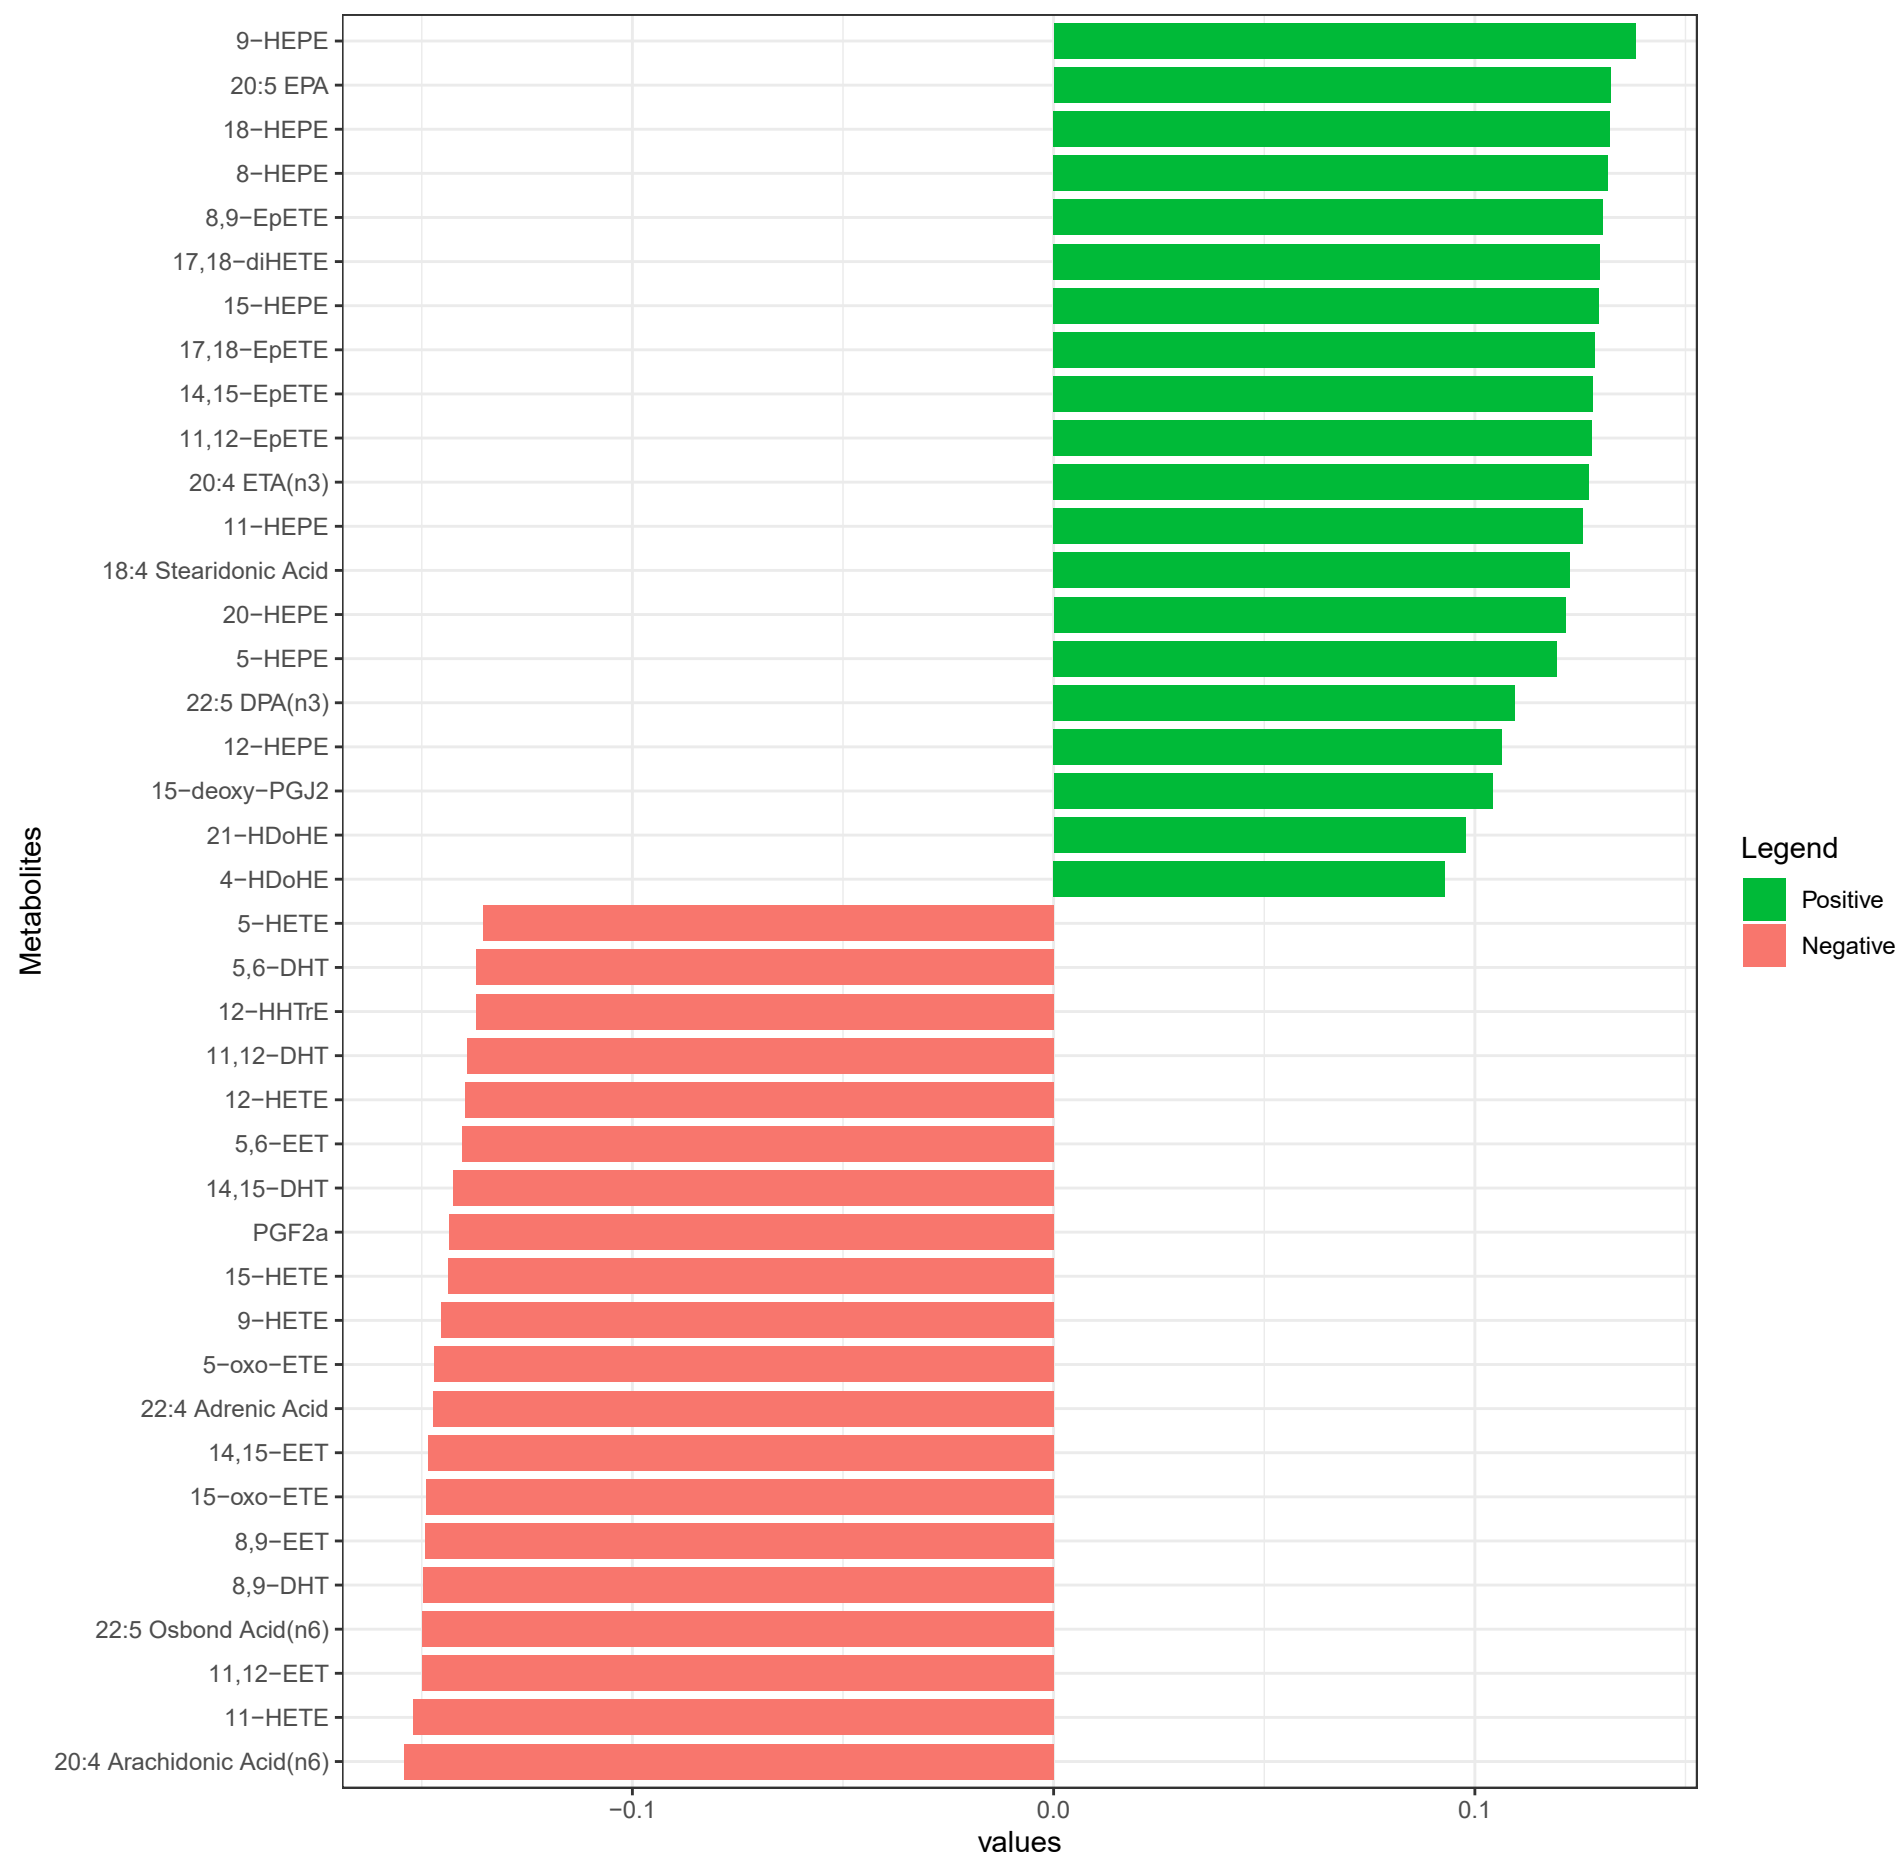

Targeted: Kidney PC2 loading plot for Top20 from max/min values

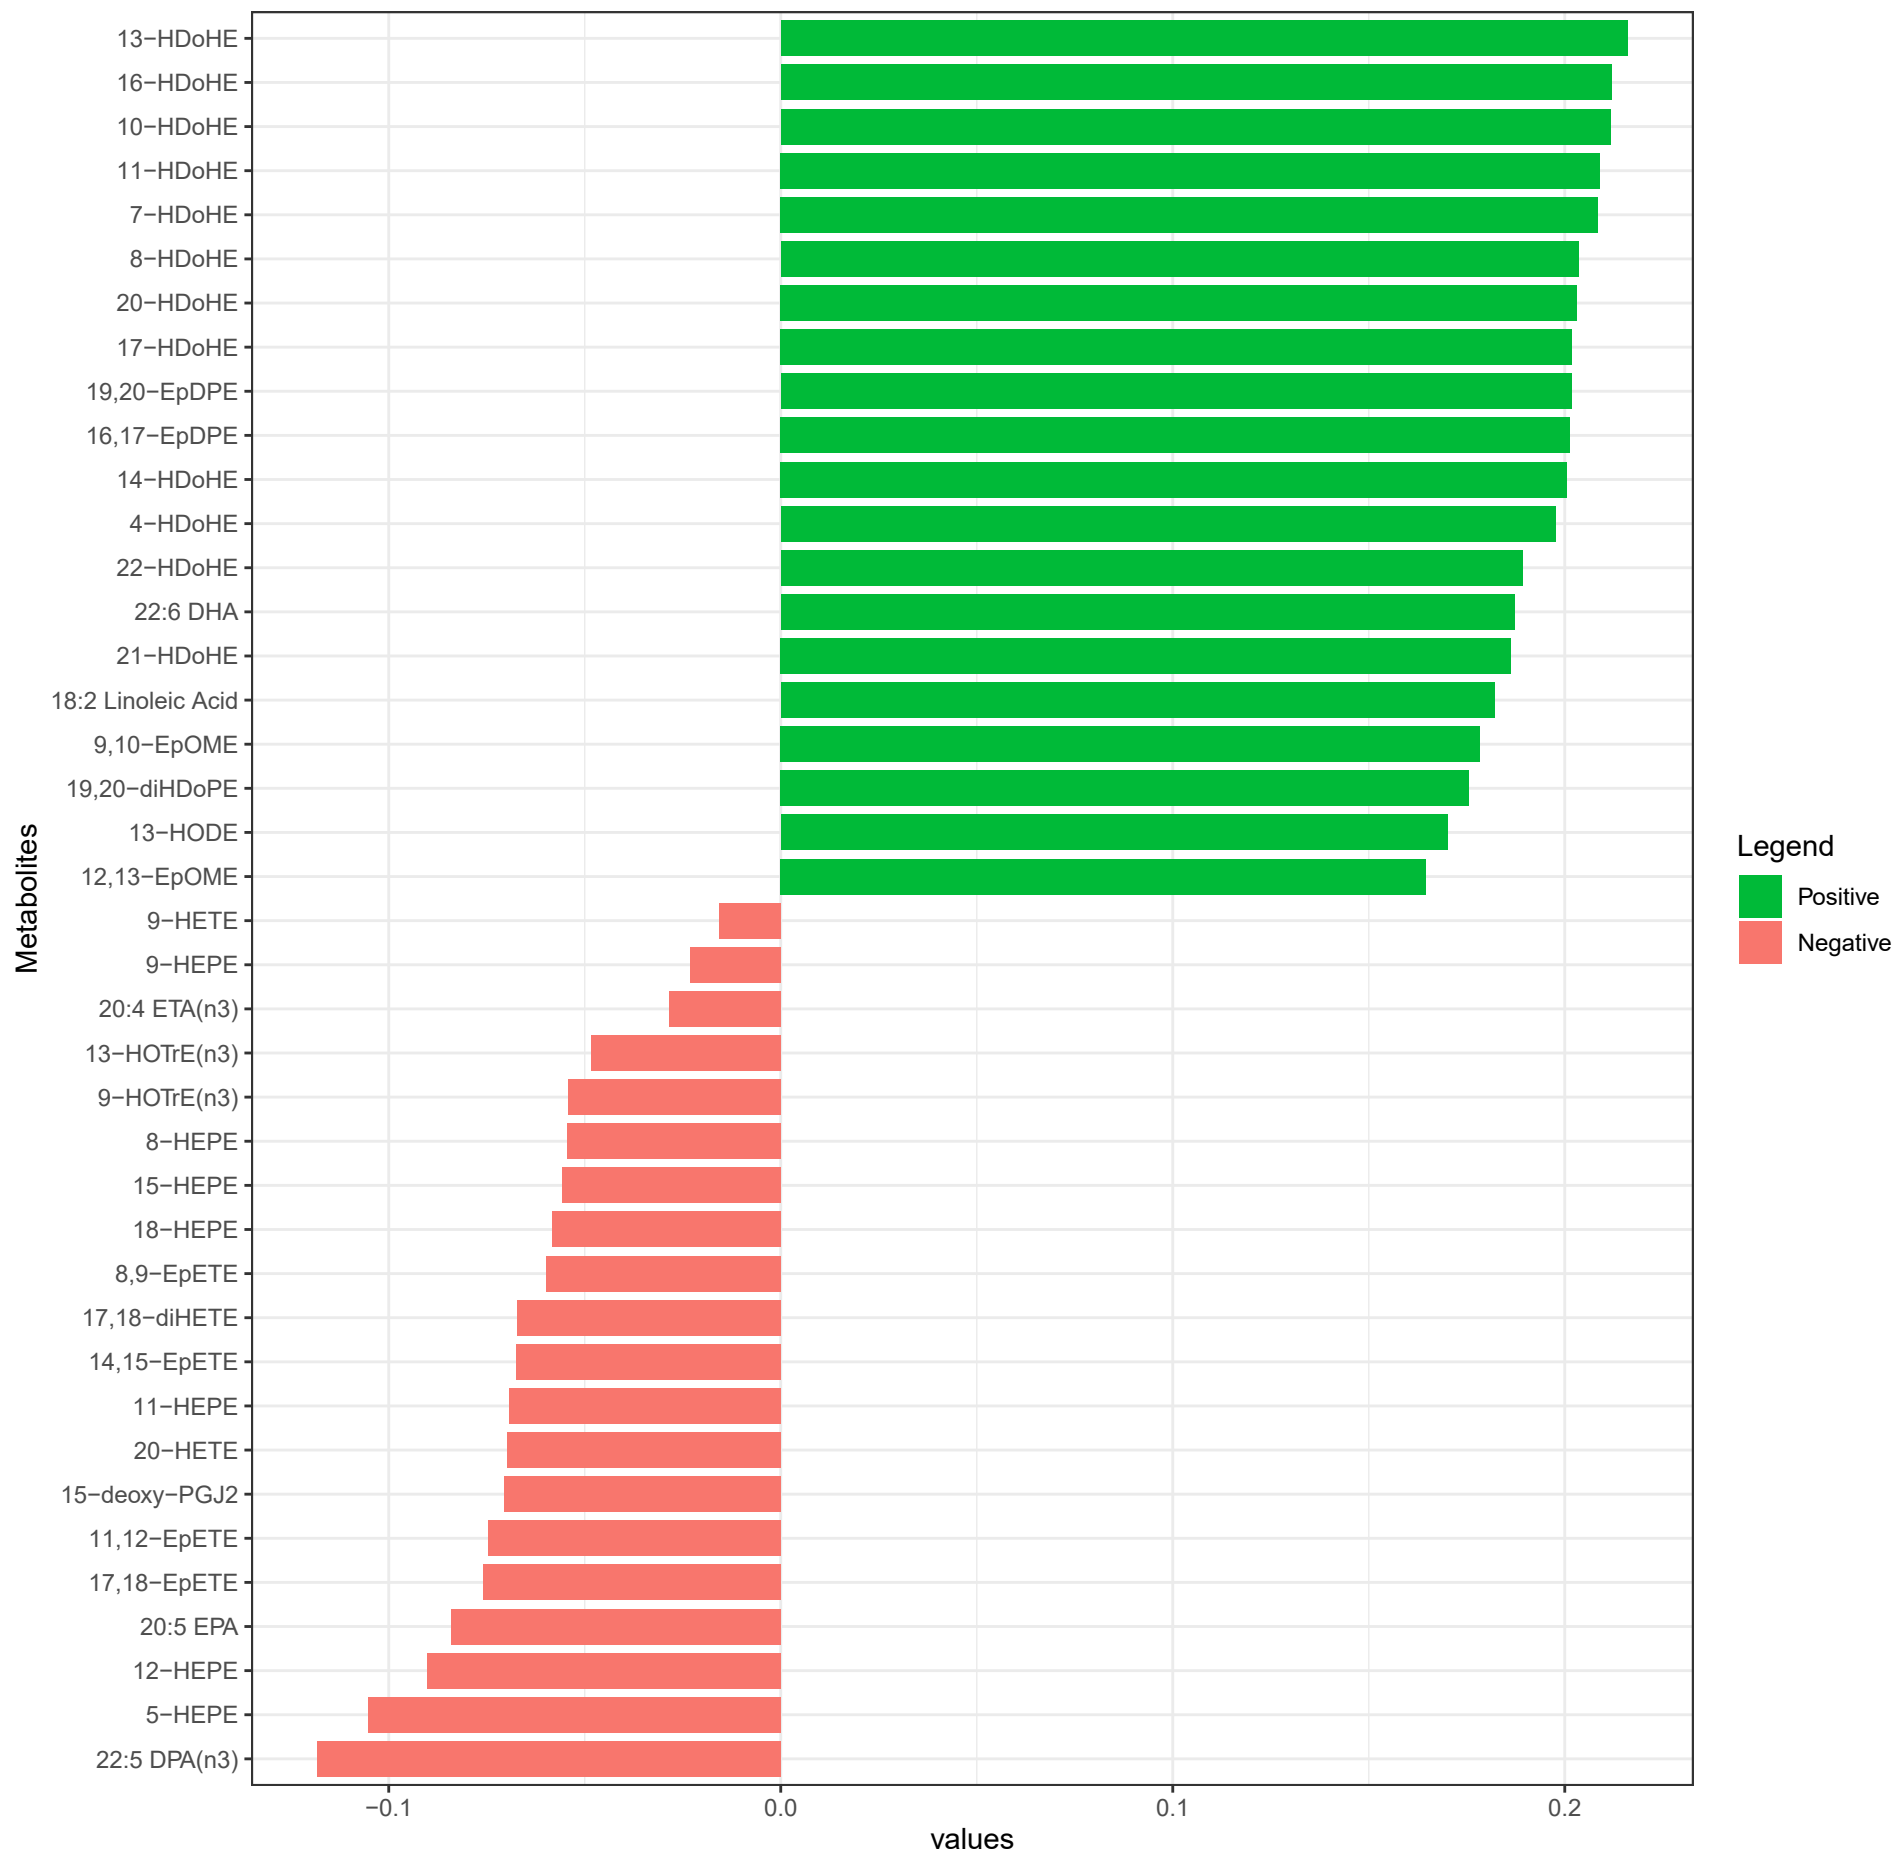

Targeted: Spleen PC1 loading plot for Top20 from max/min values

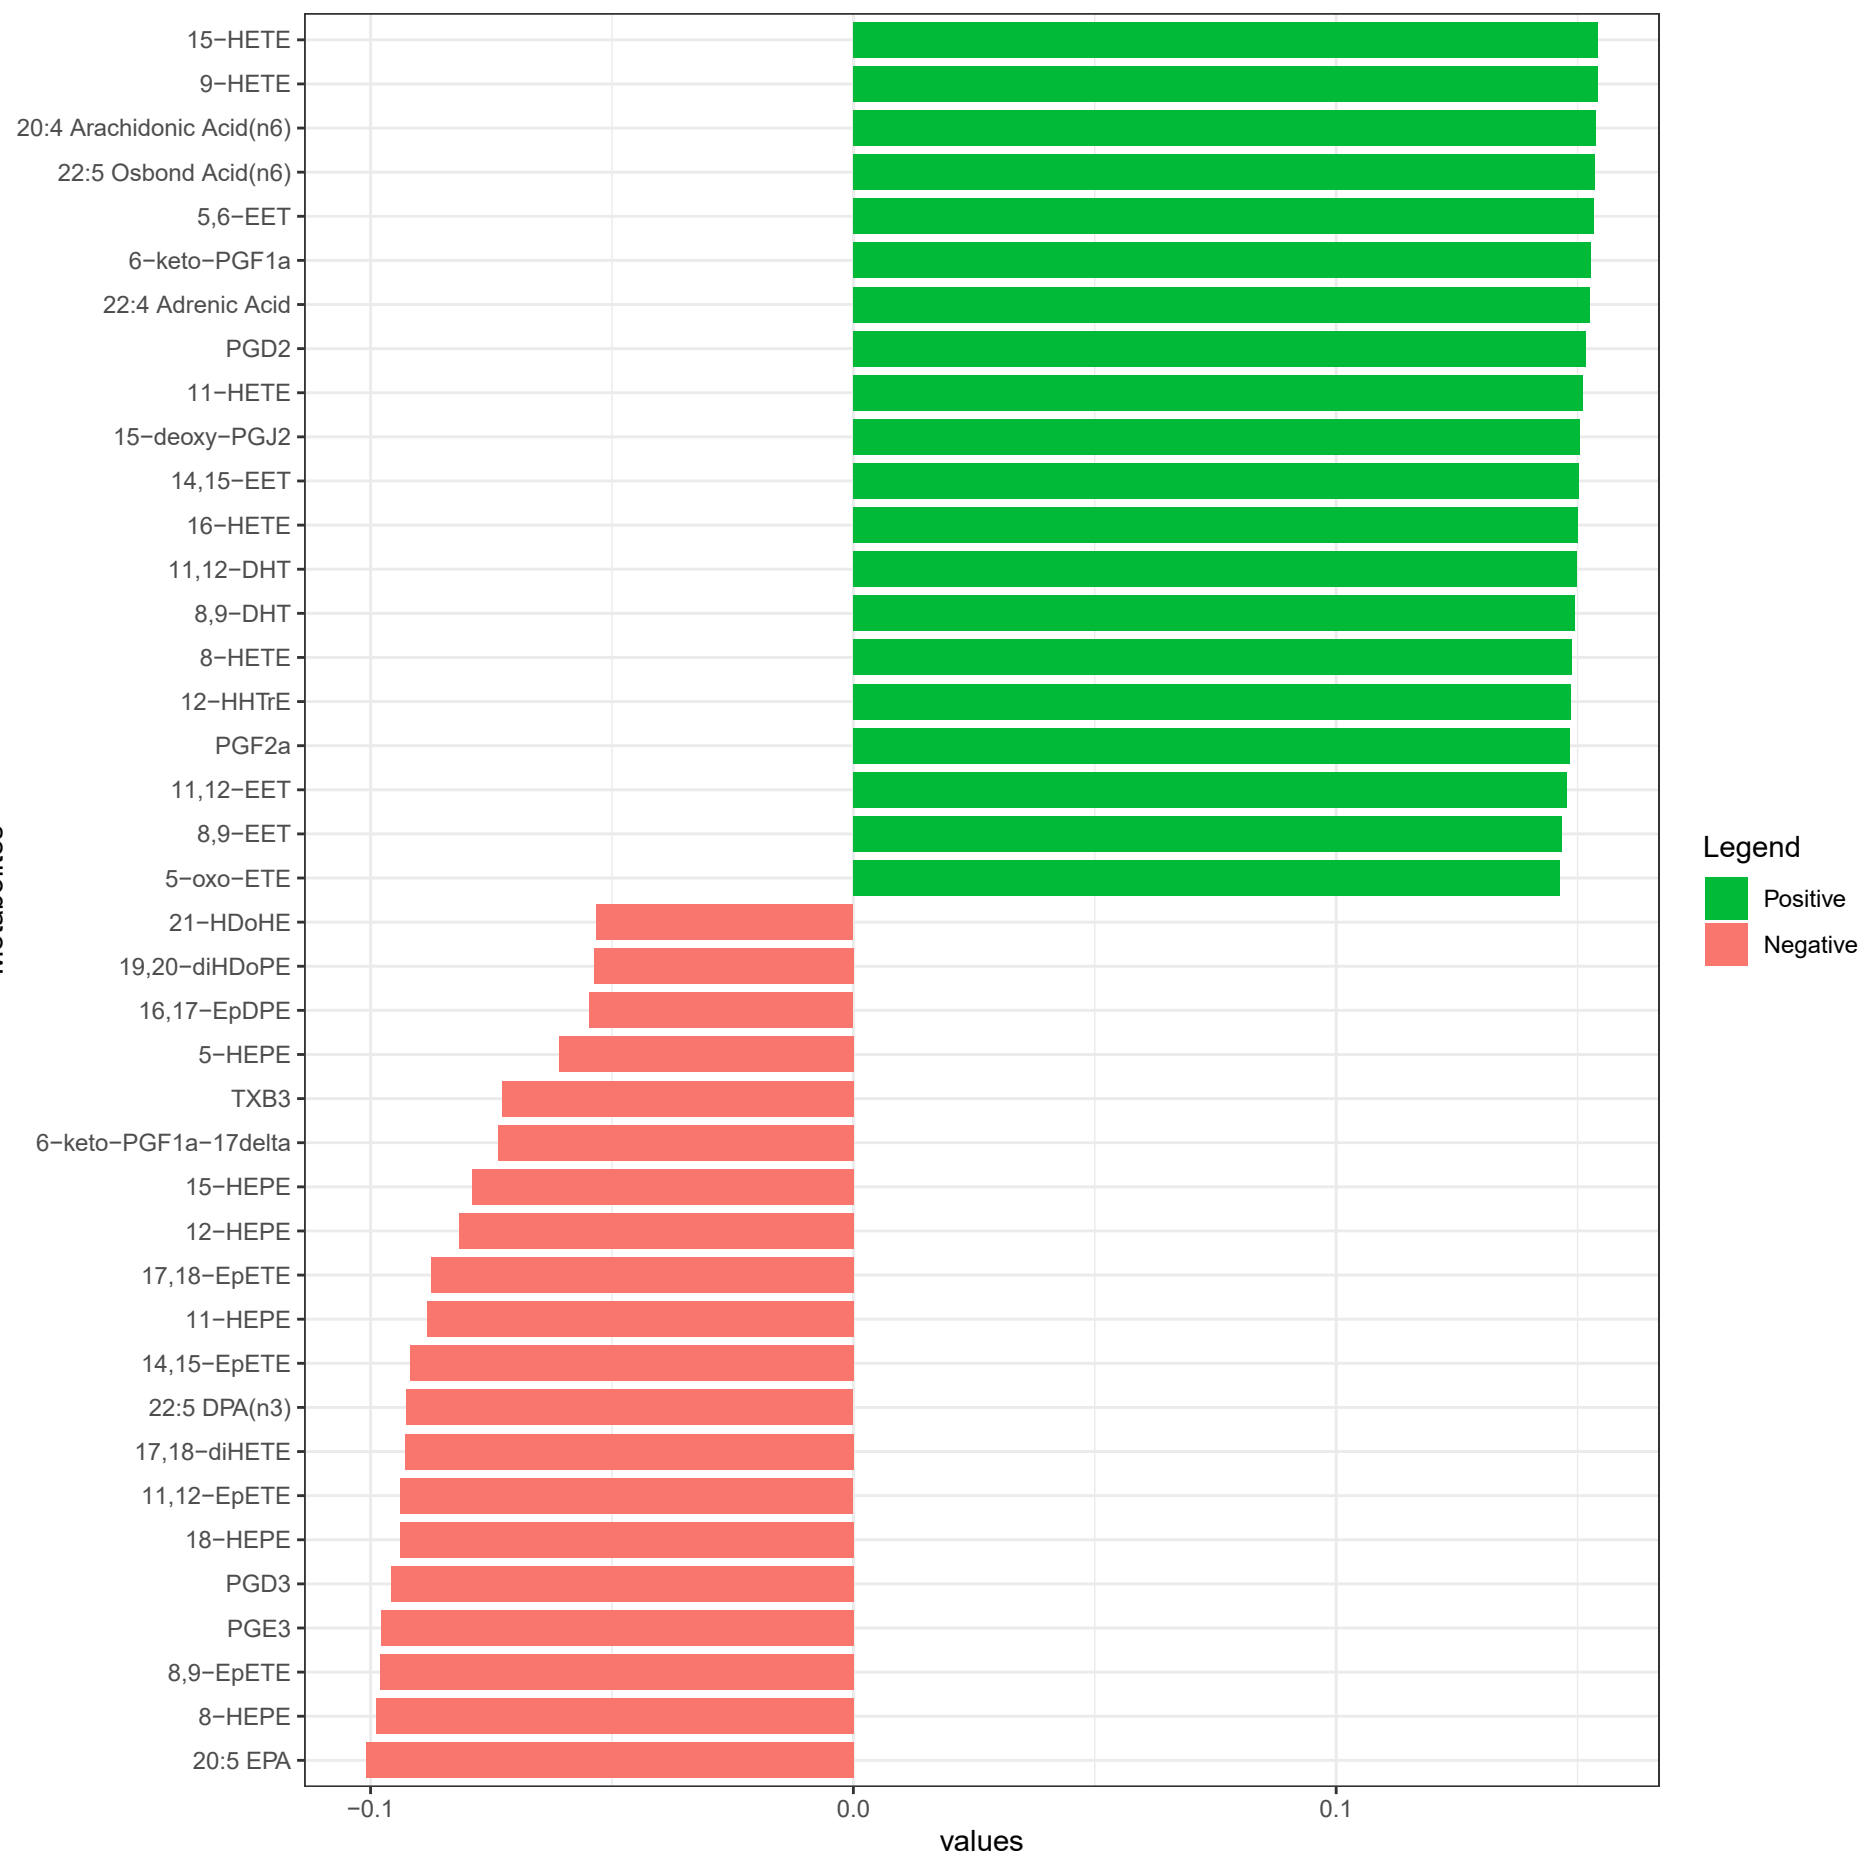

Targeted: Spleen PC2 loading plot for Top20 from max/min values

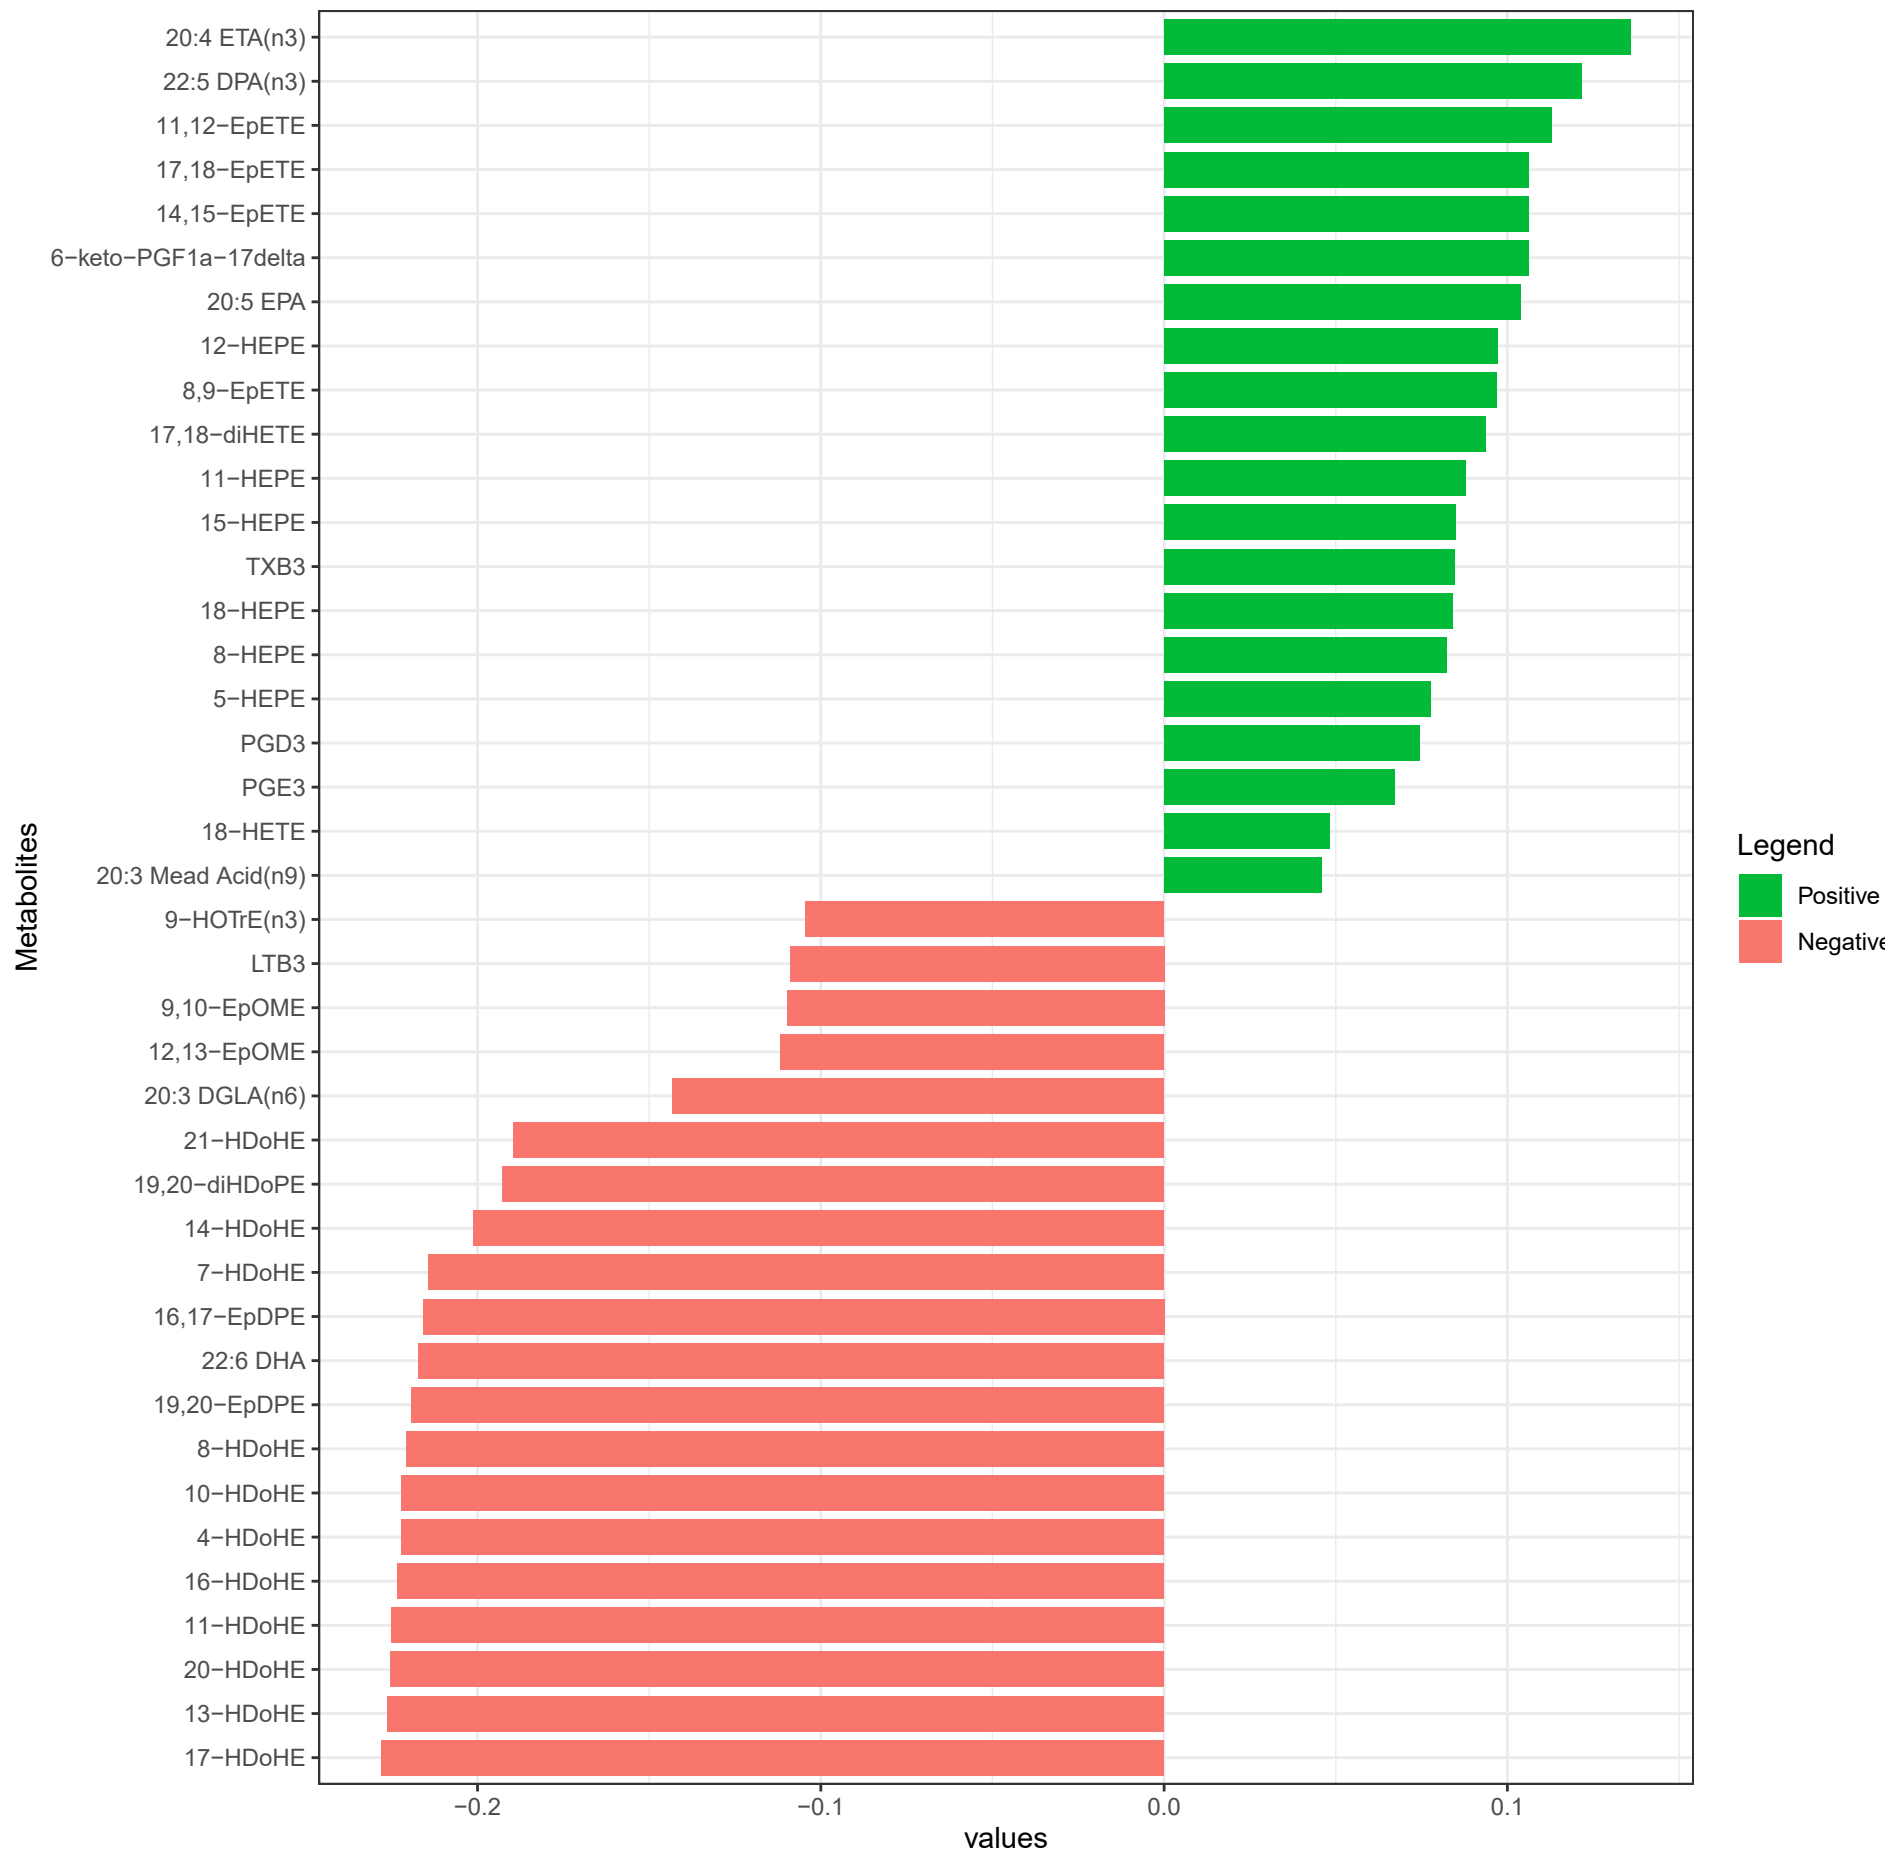

Targeted: Lung PC1 loading plot for Top20 from max/min values

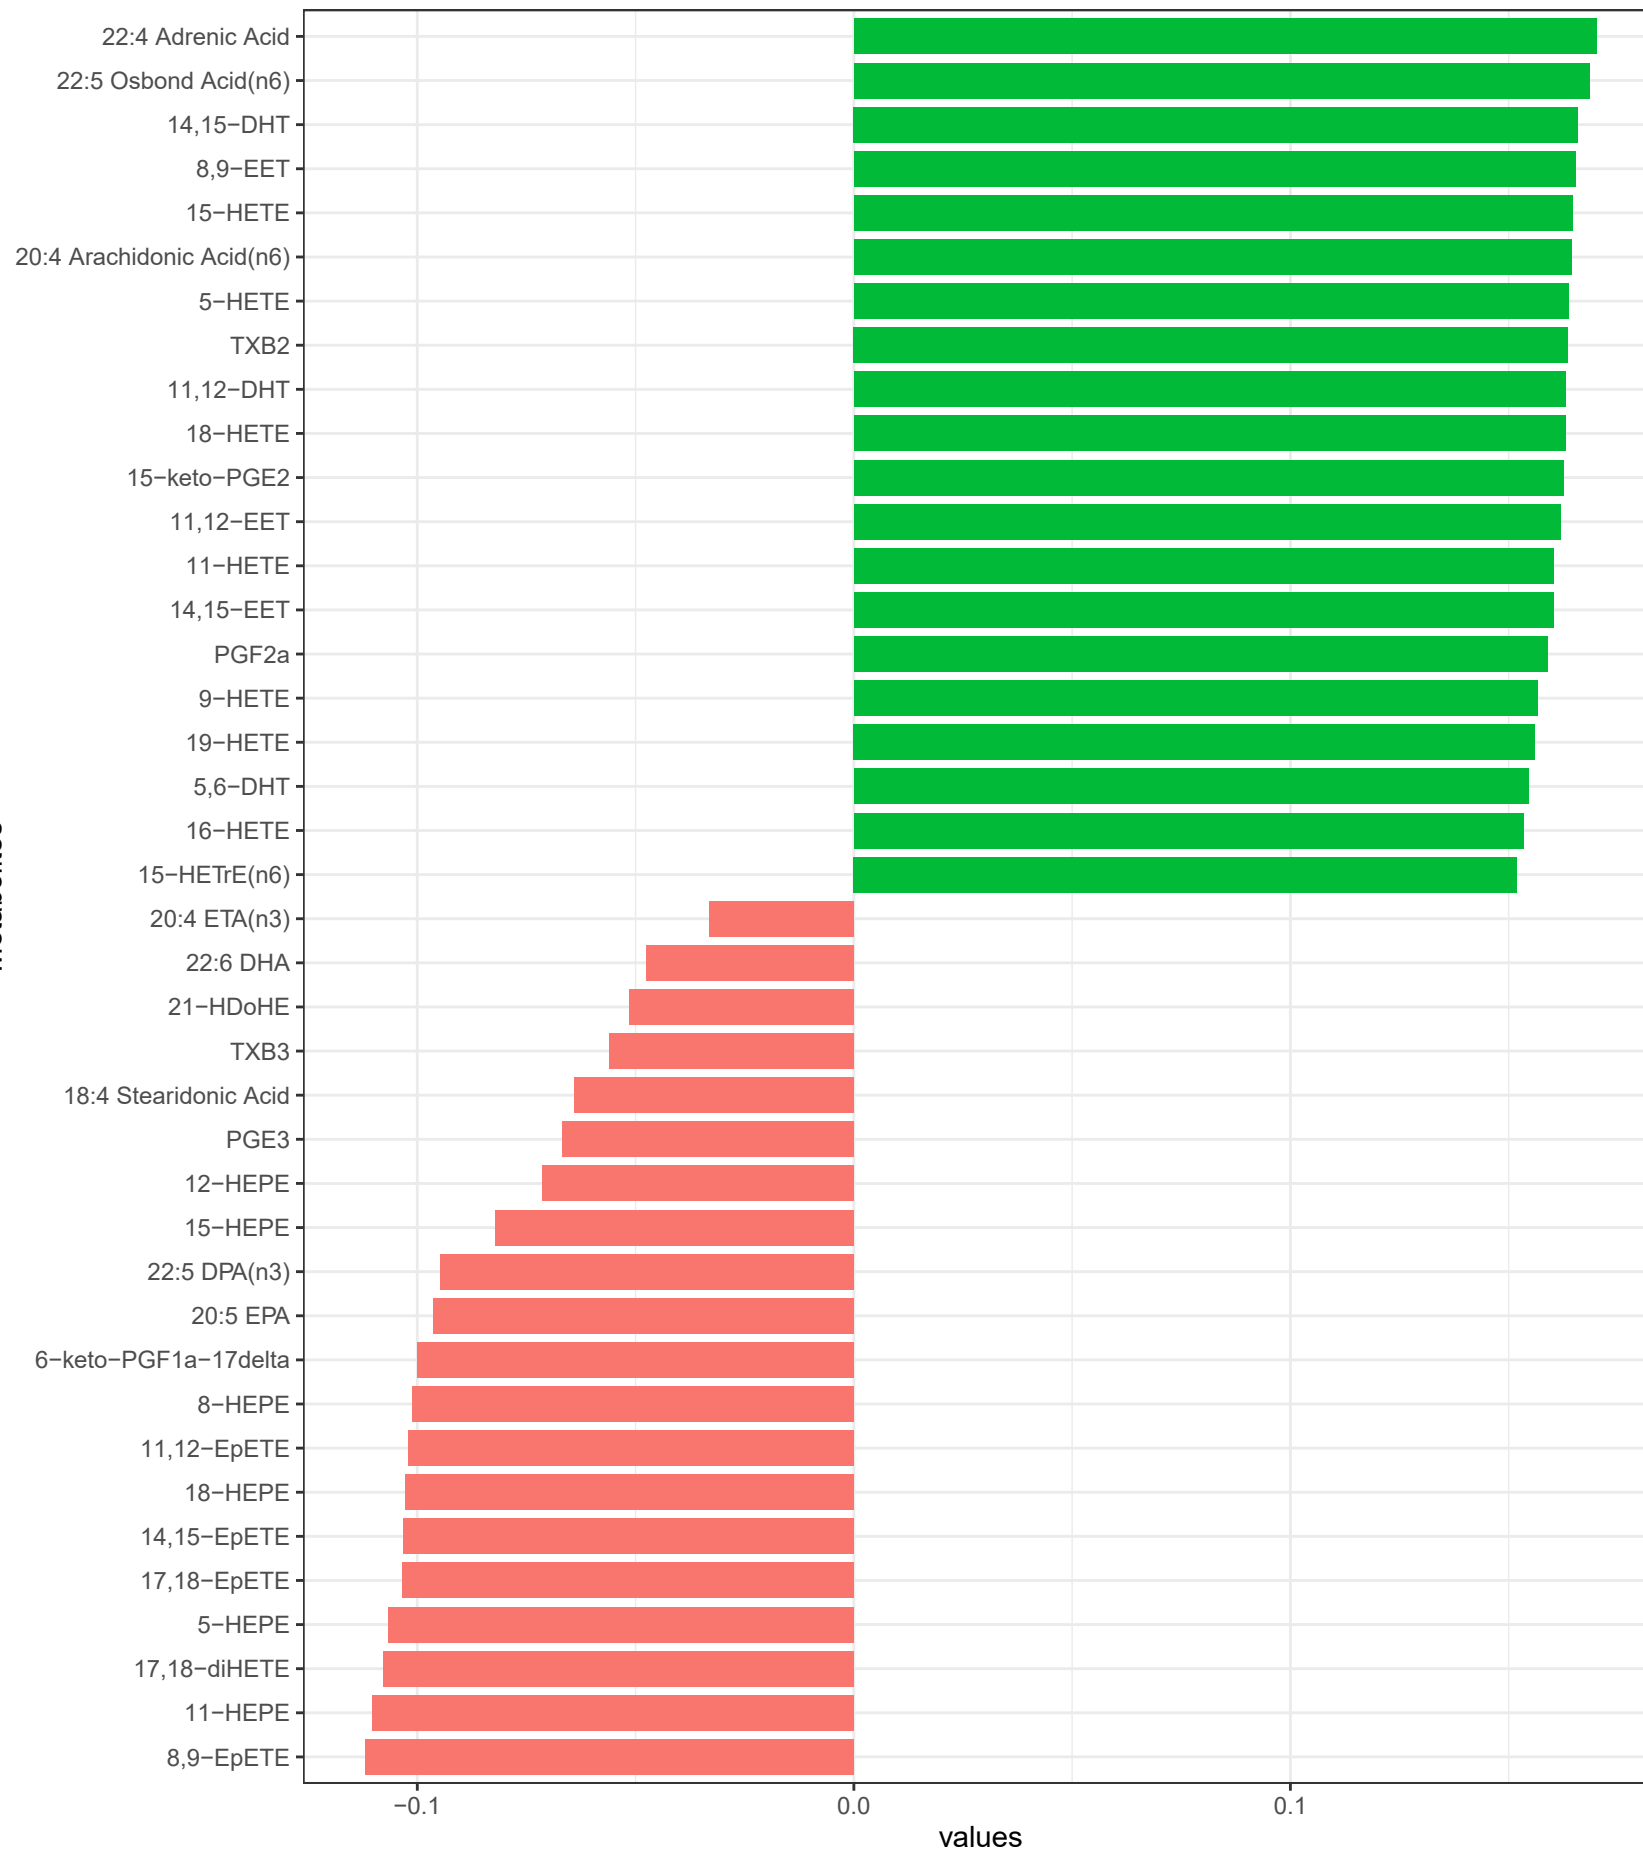

Targeted: Lung PC2 loading plot for Top20 from max/min values

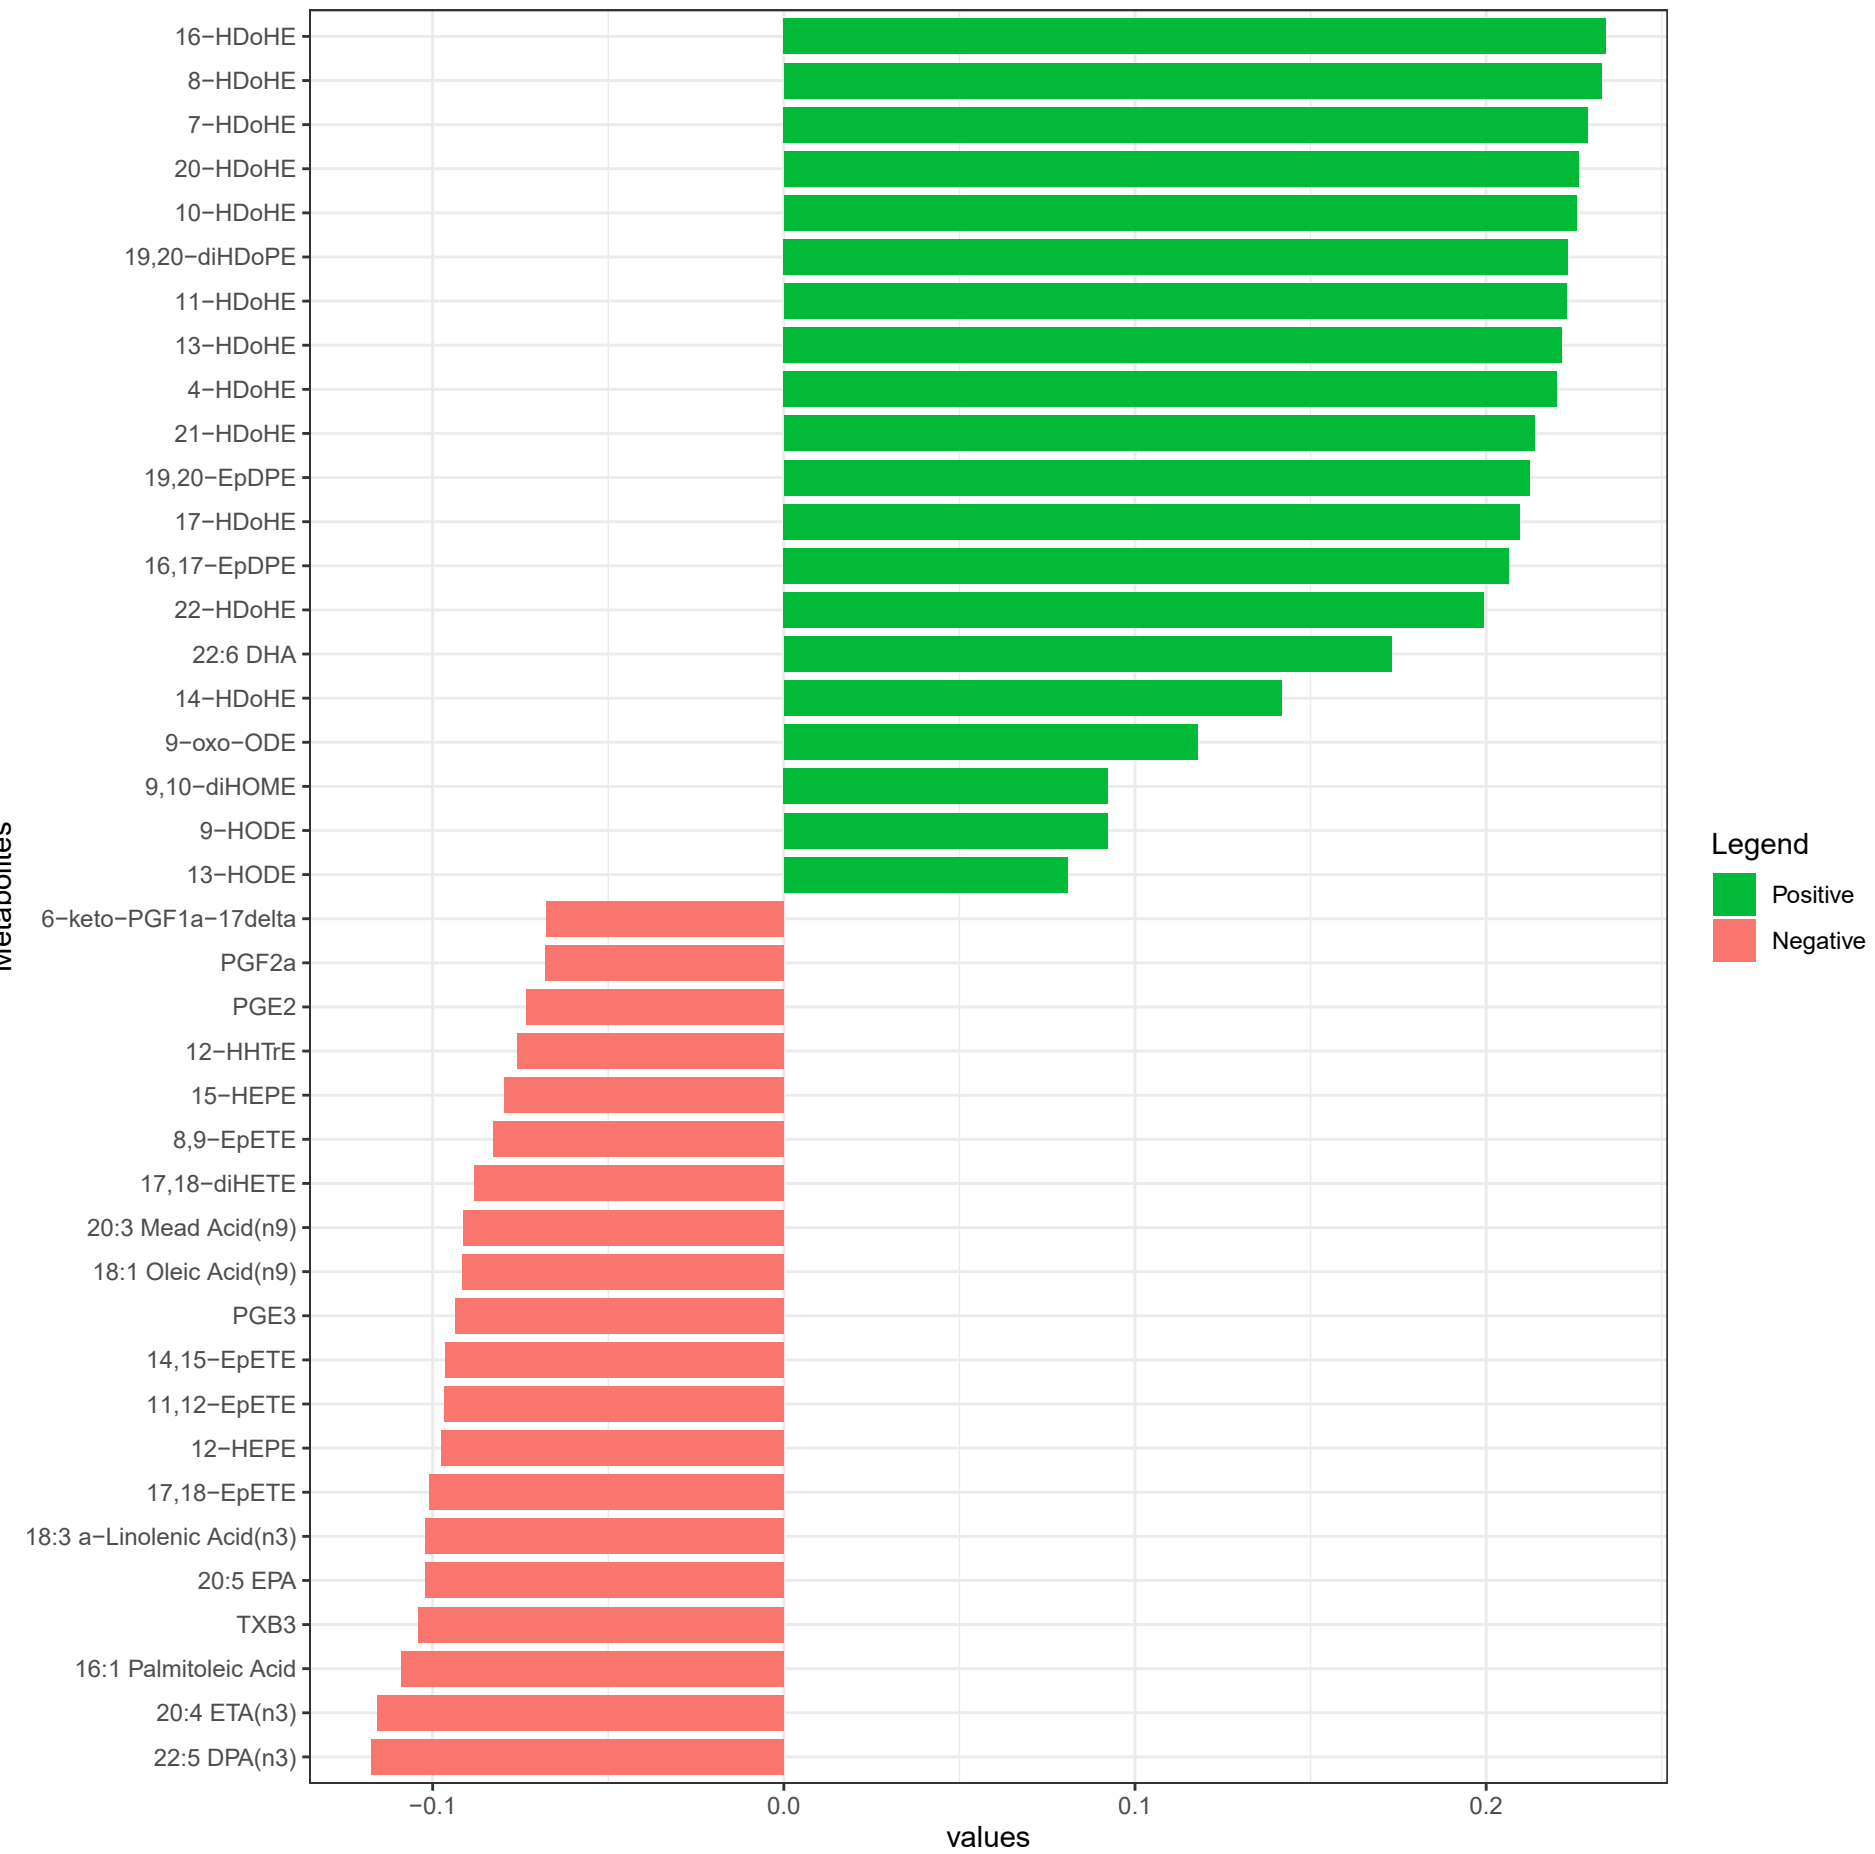

Targeted: Small intestine PC1 loading plot for Top20 from max/min values

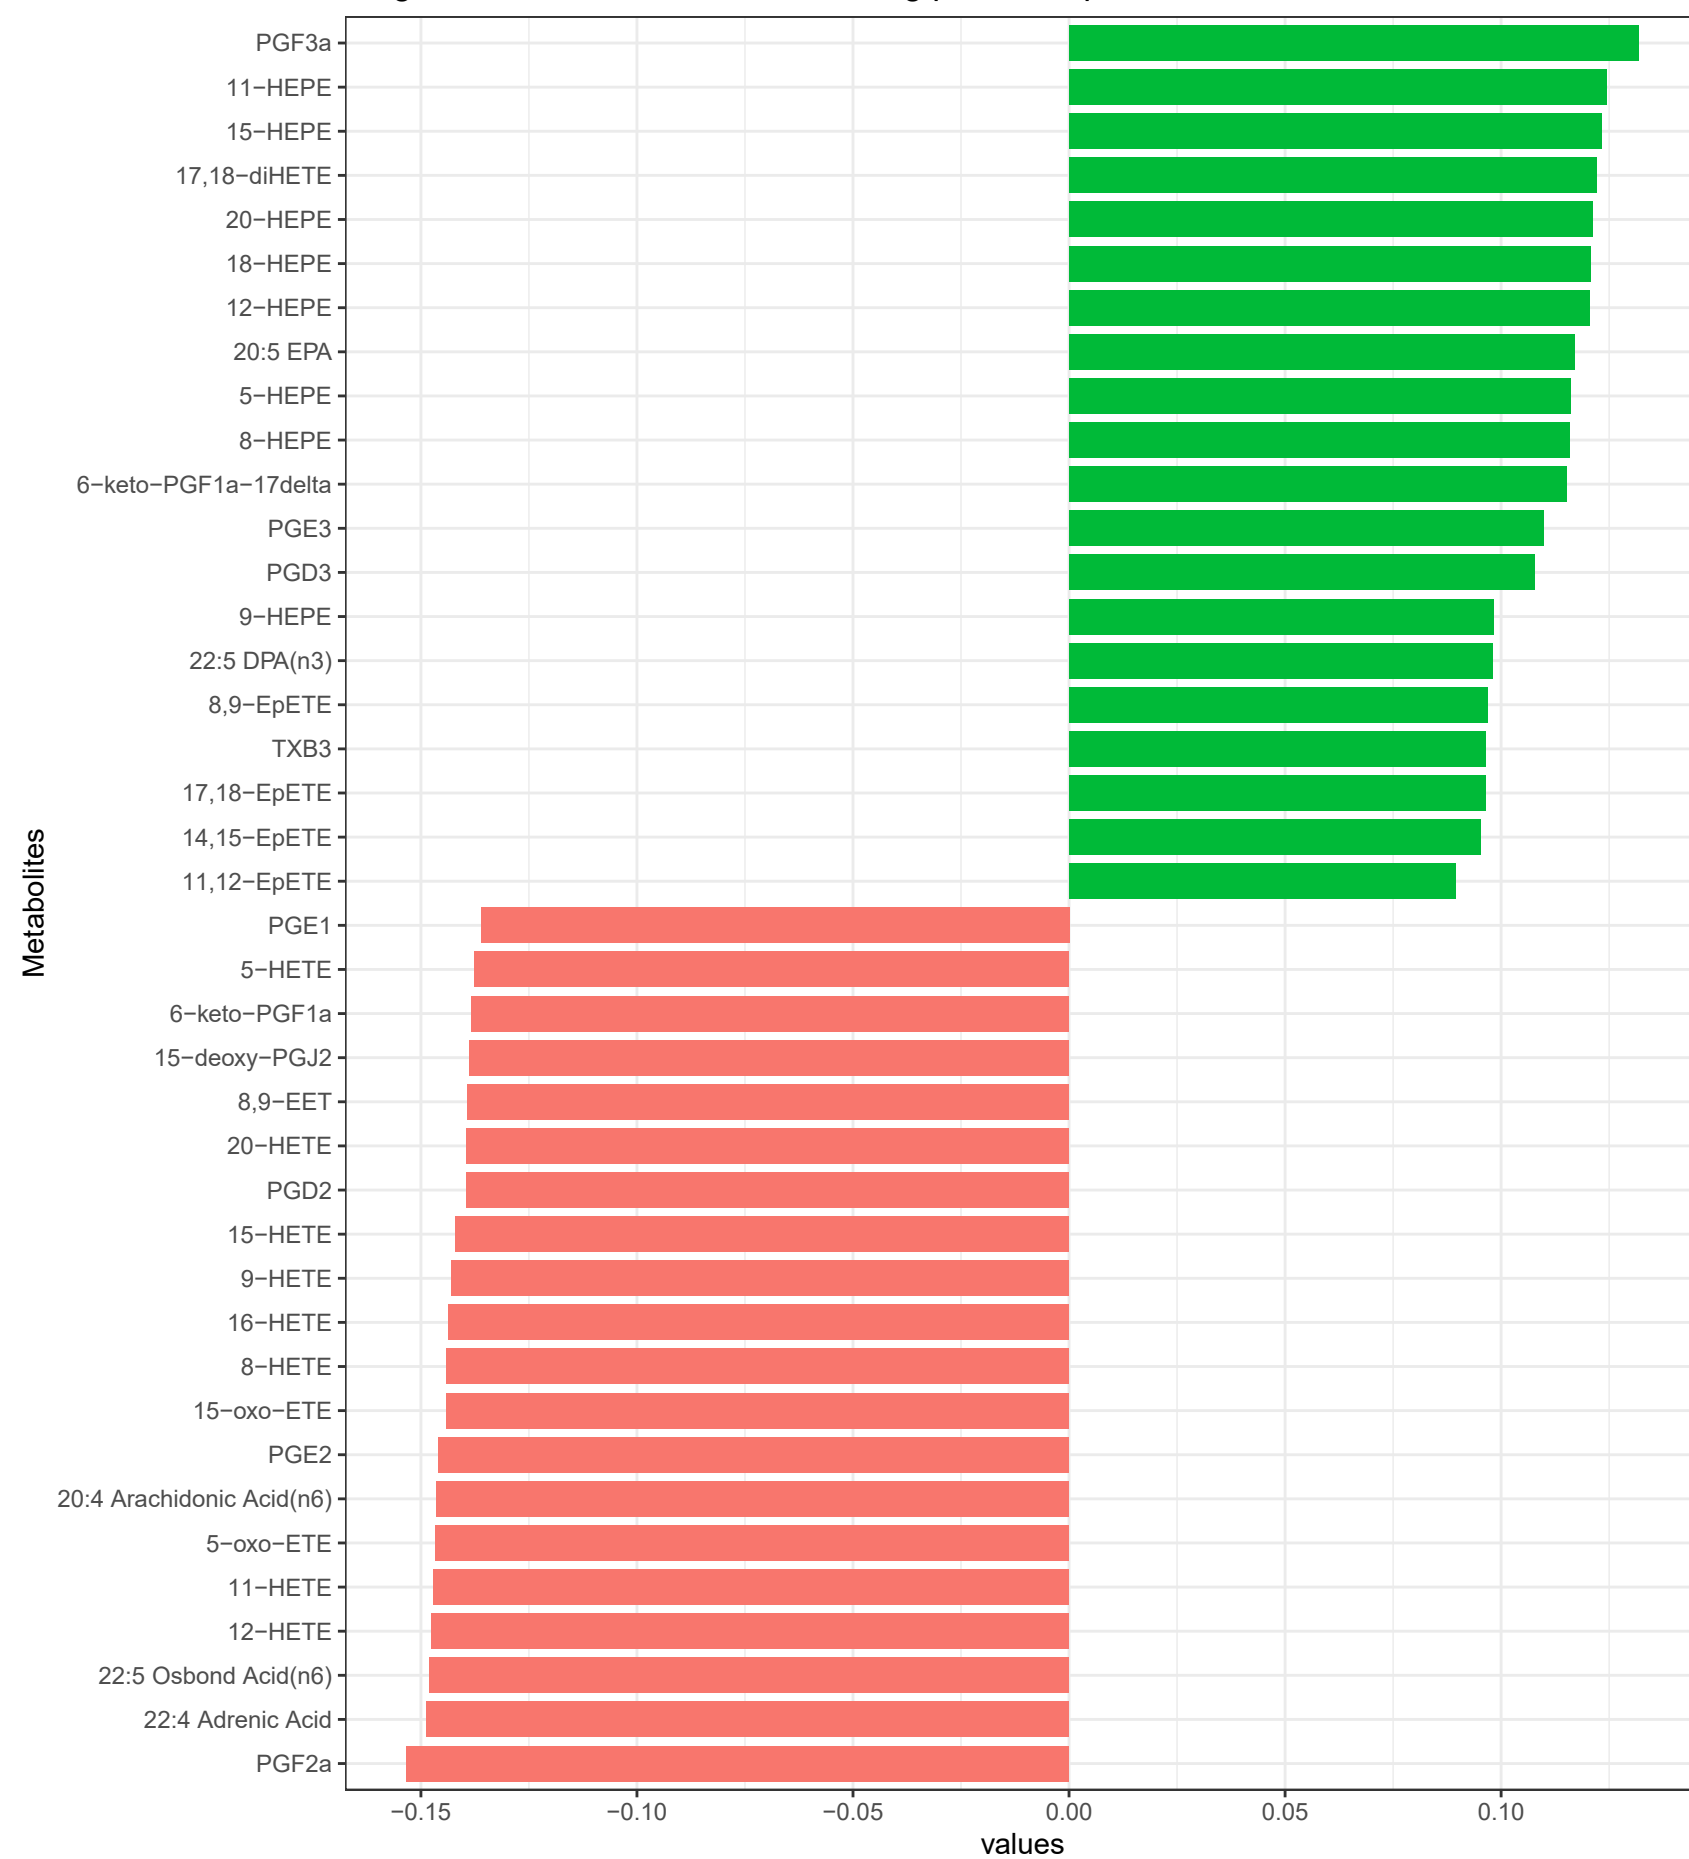

Targeted: Small intestine PC2 loading plot for Top20 from max/min values

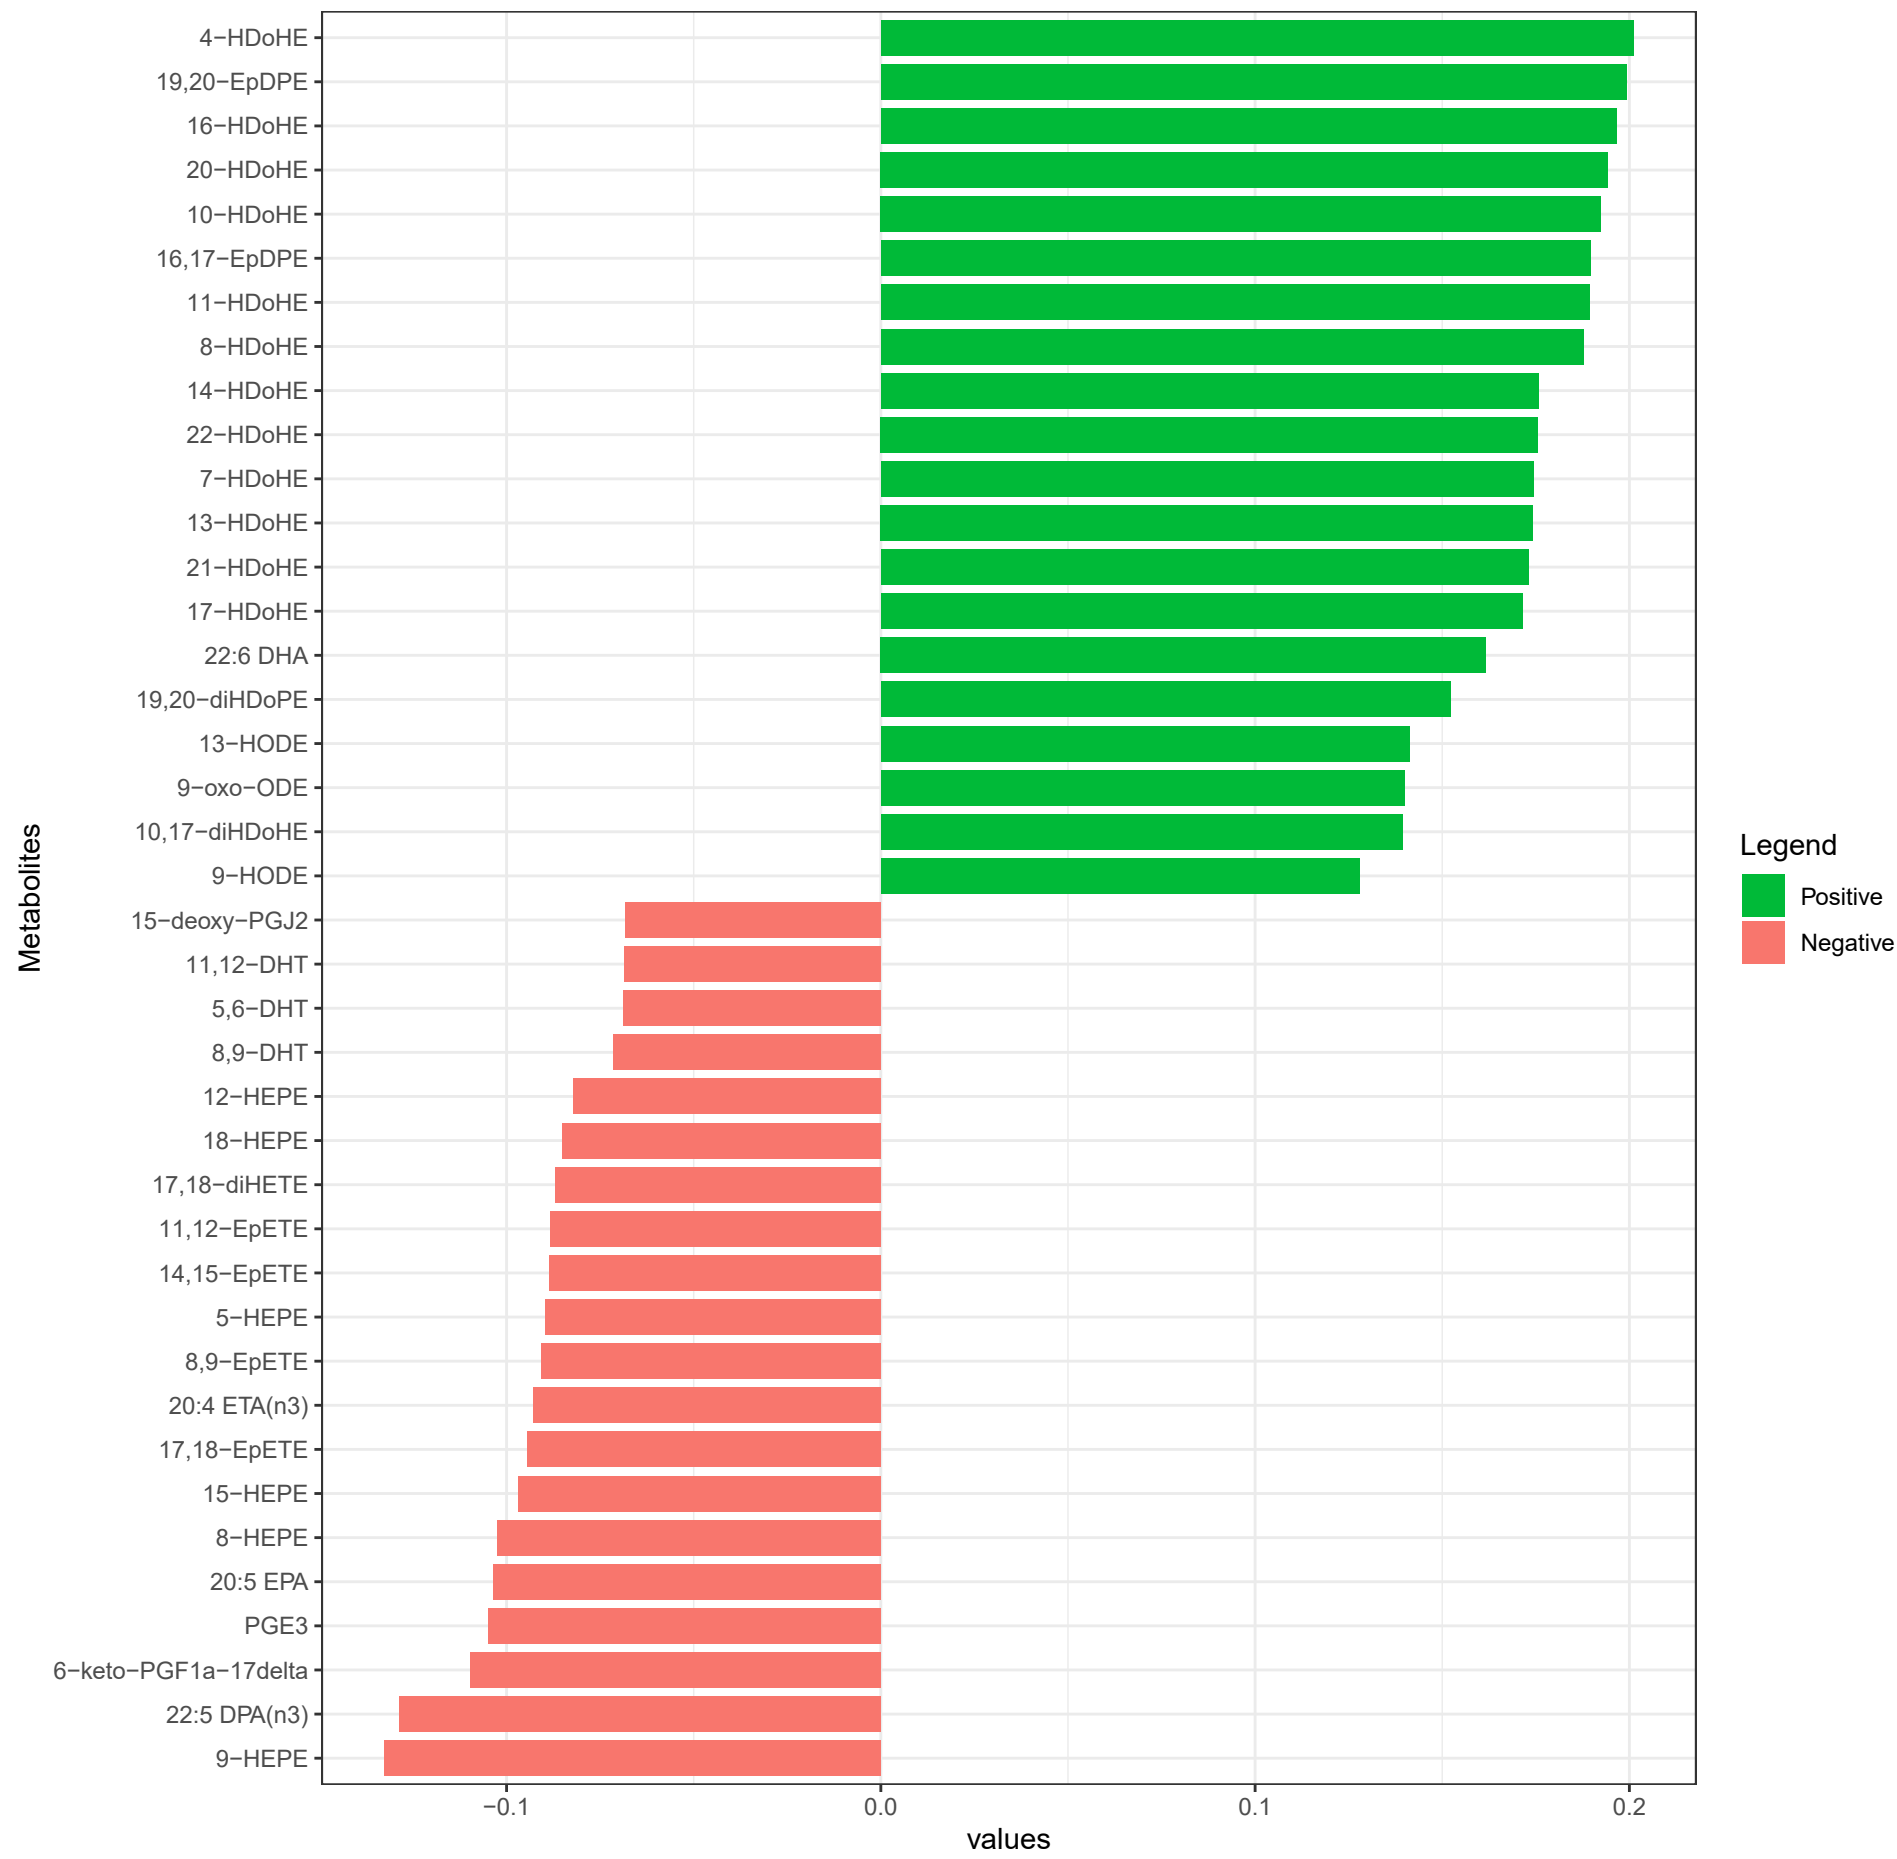



Targeted: Skeletal muscle PC1 loading plot for Top20 from max/min values

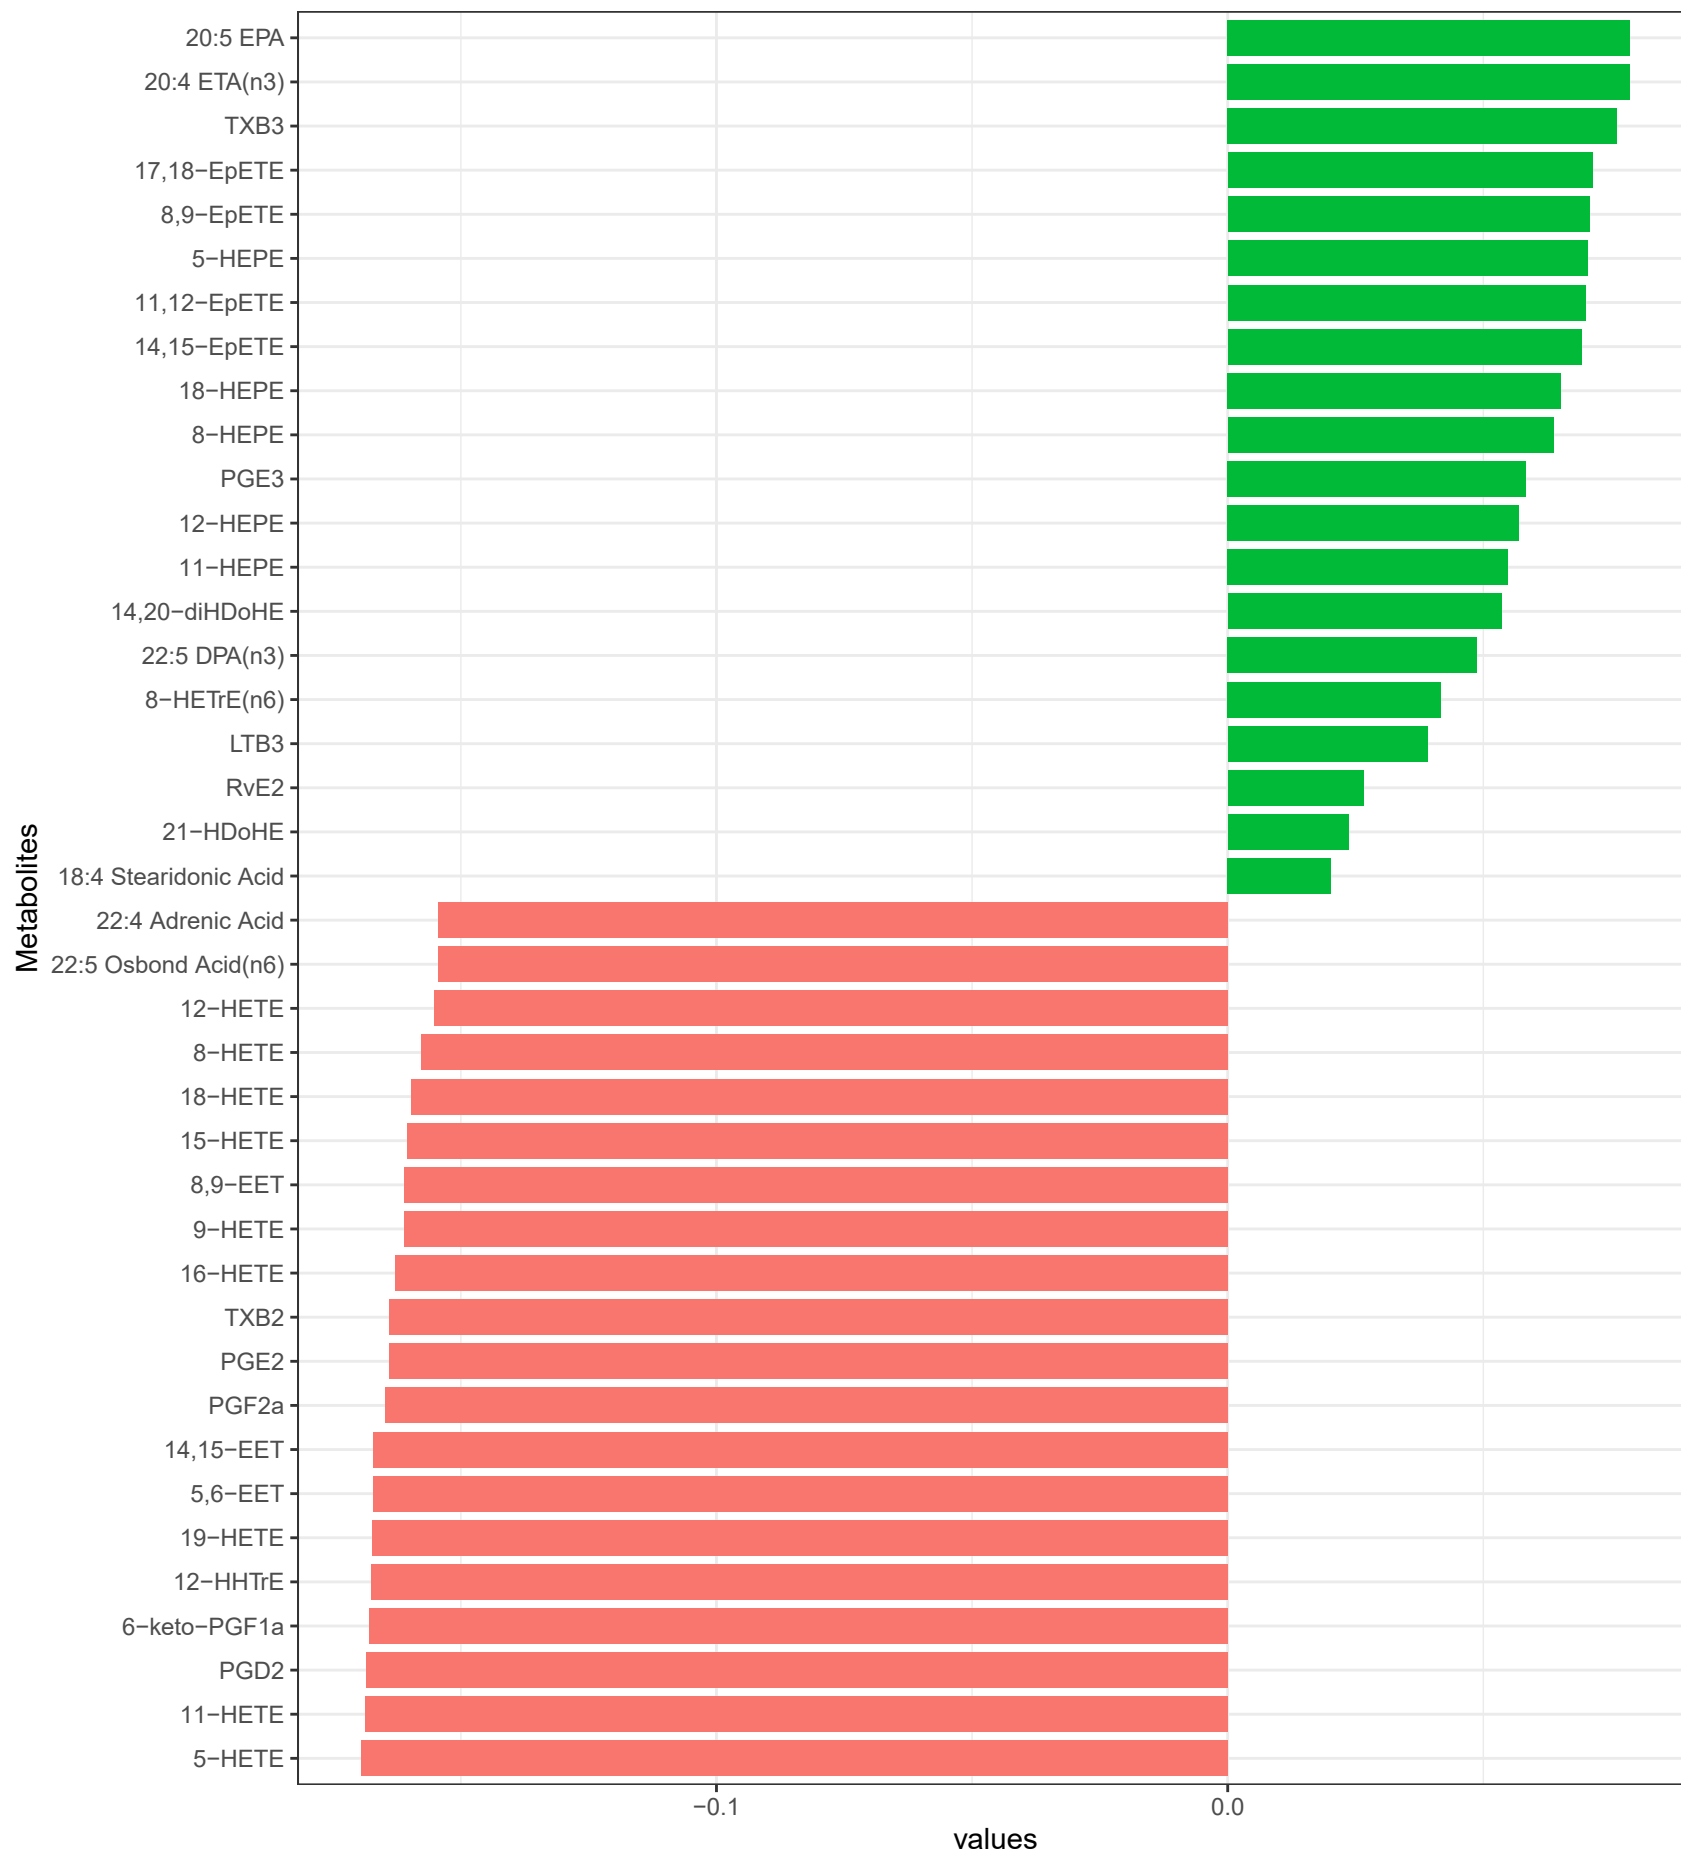

Targeted: Skeletal muscle PC2 loading plot for Top20 from max/min values

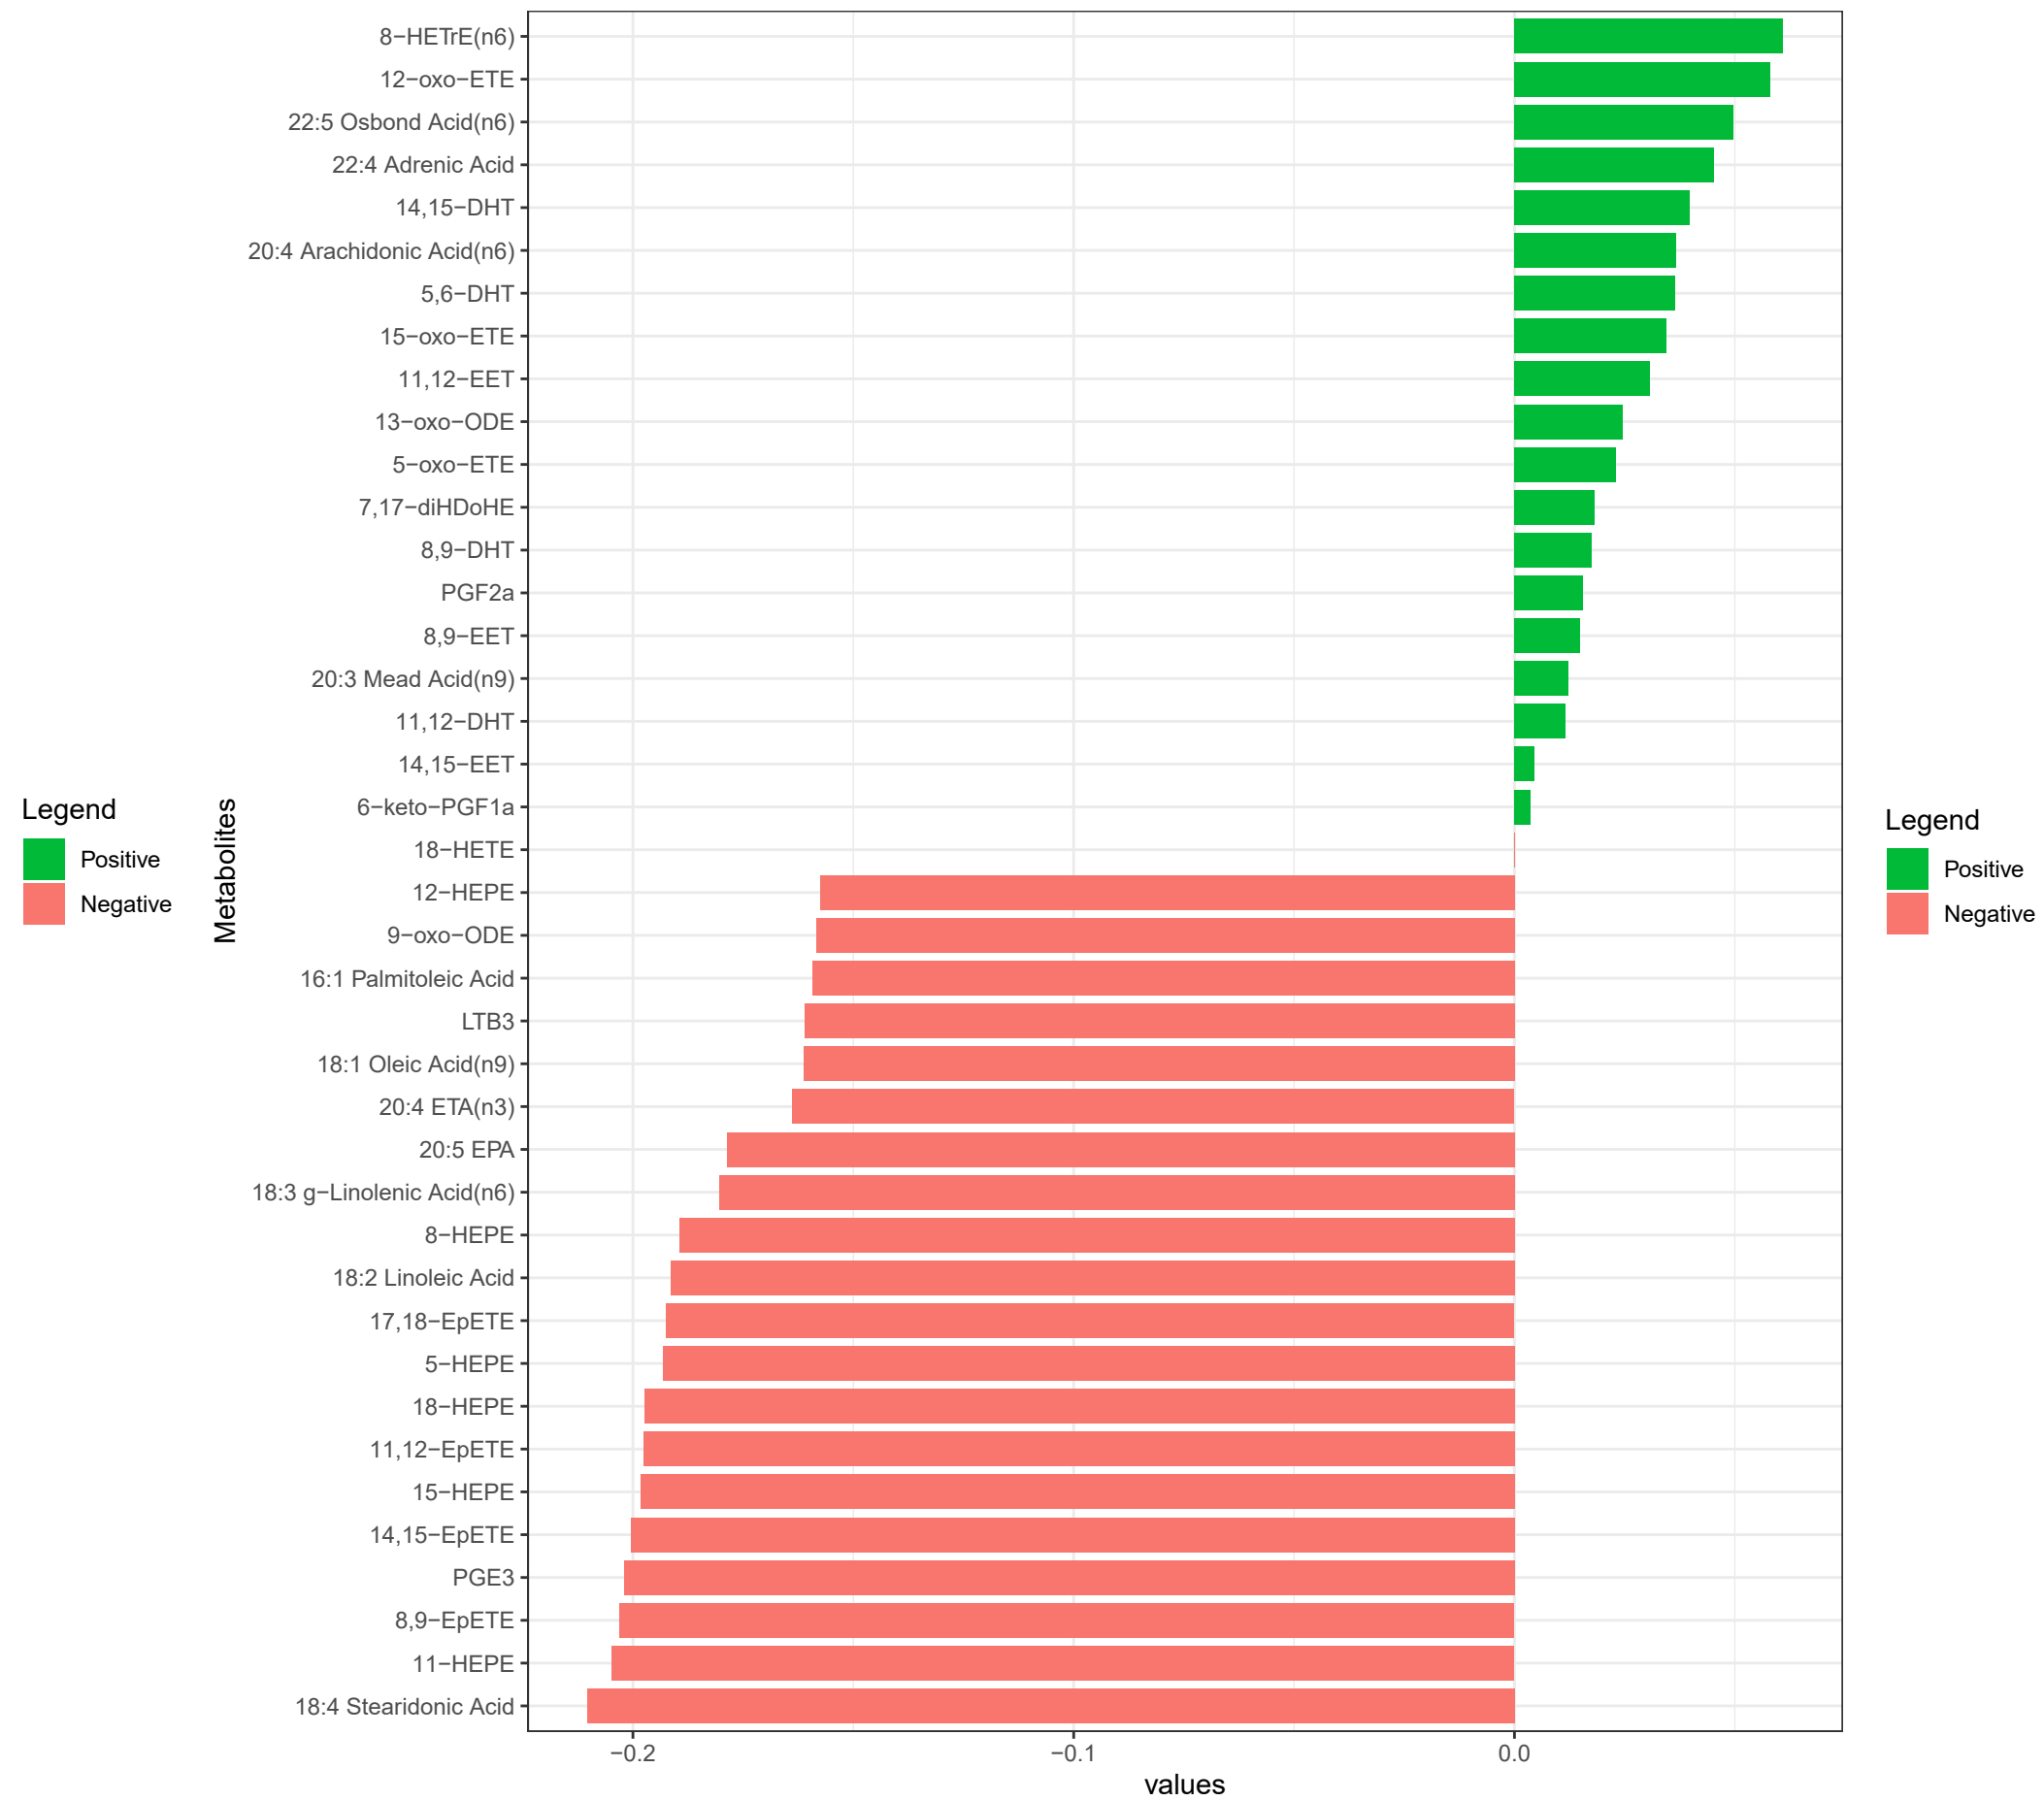

Targeted: Adipose PC1 loading plot for Top20 from max/min values

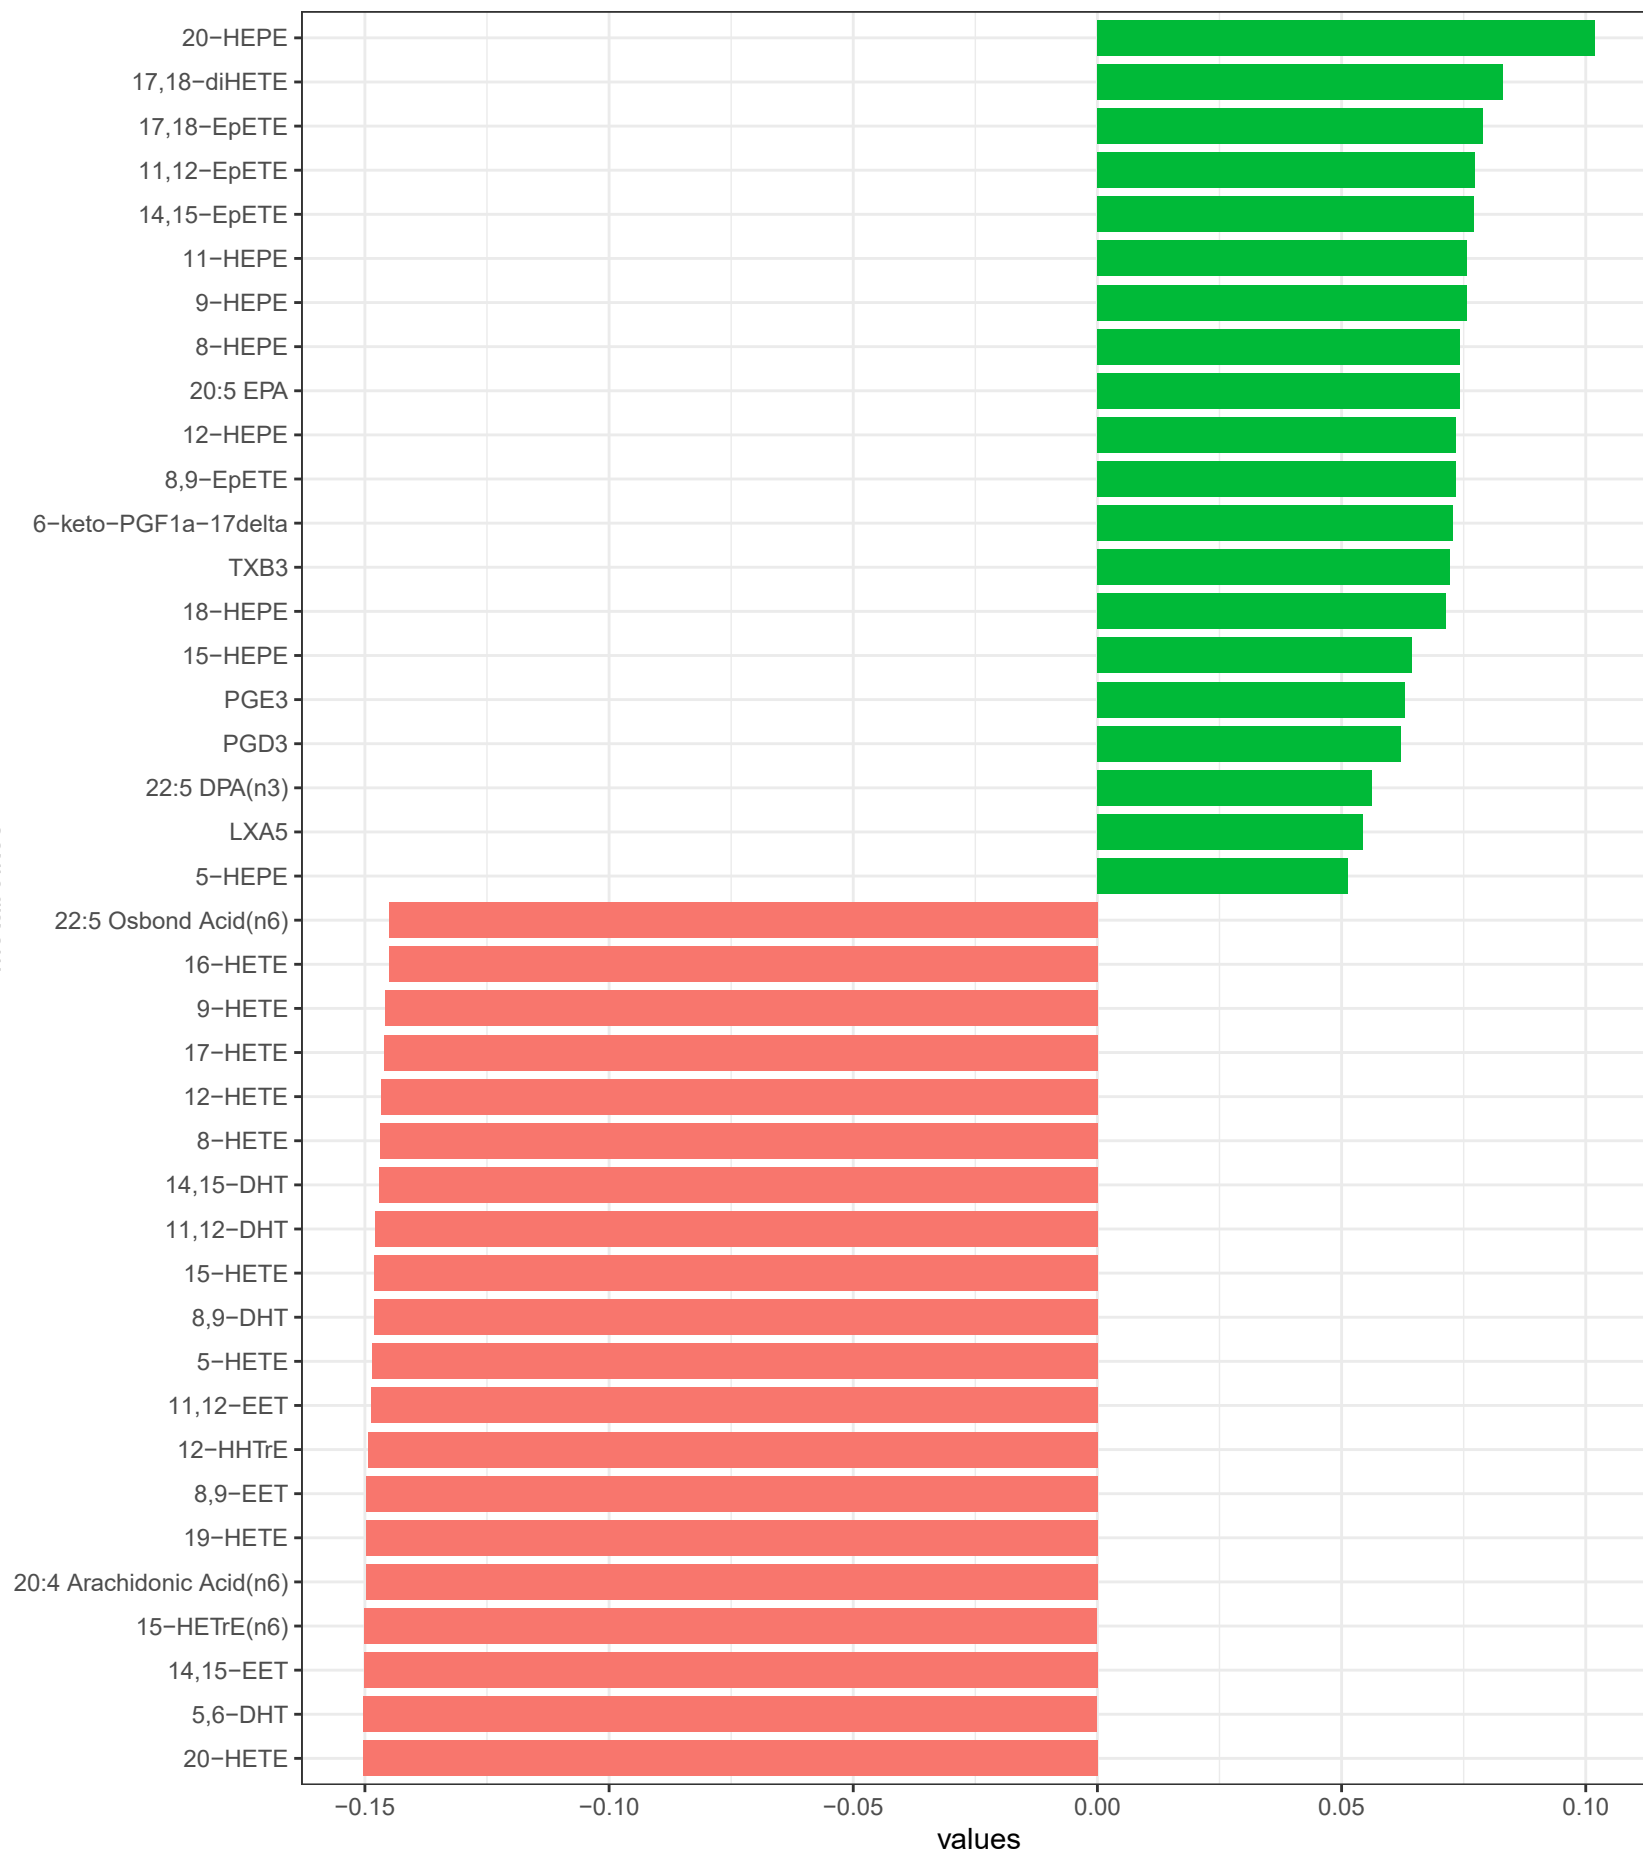

Legend

Positive

Negative

Metabolites

Targeted: Adipose PC2 loading plot for Top20 from max/min values

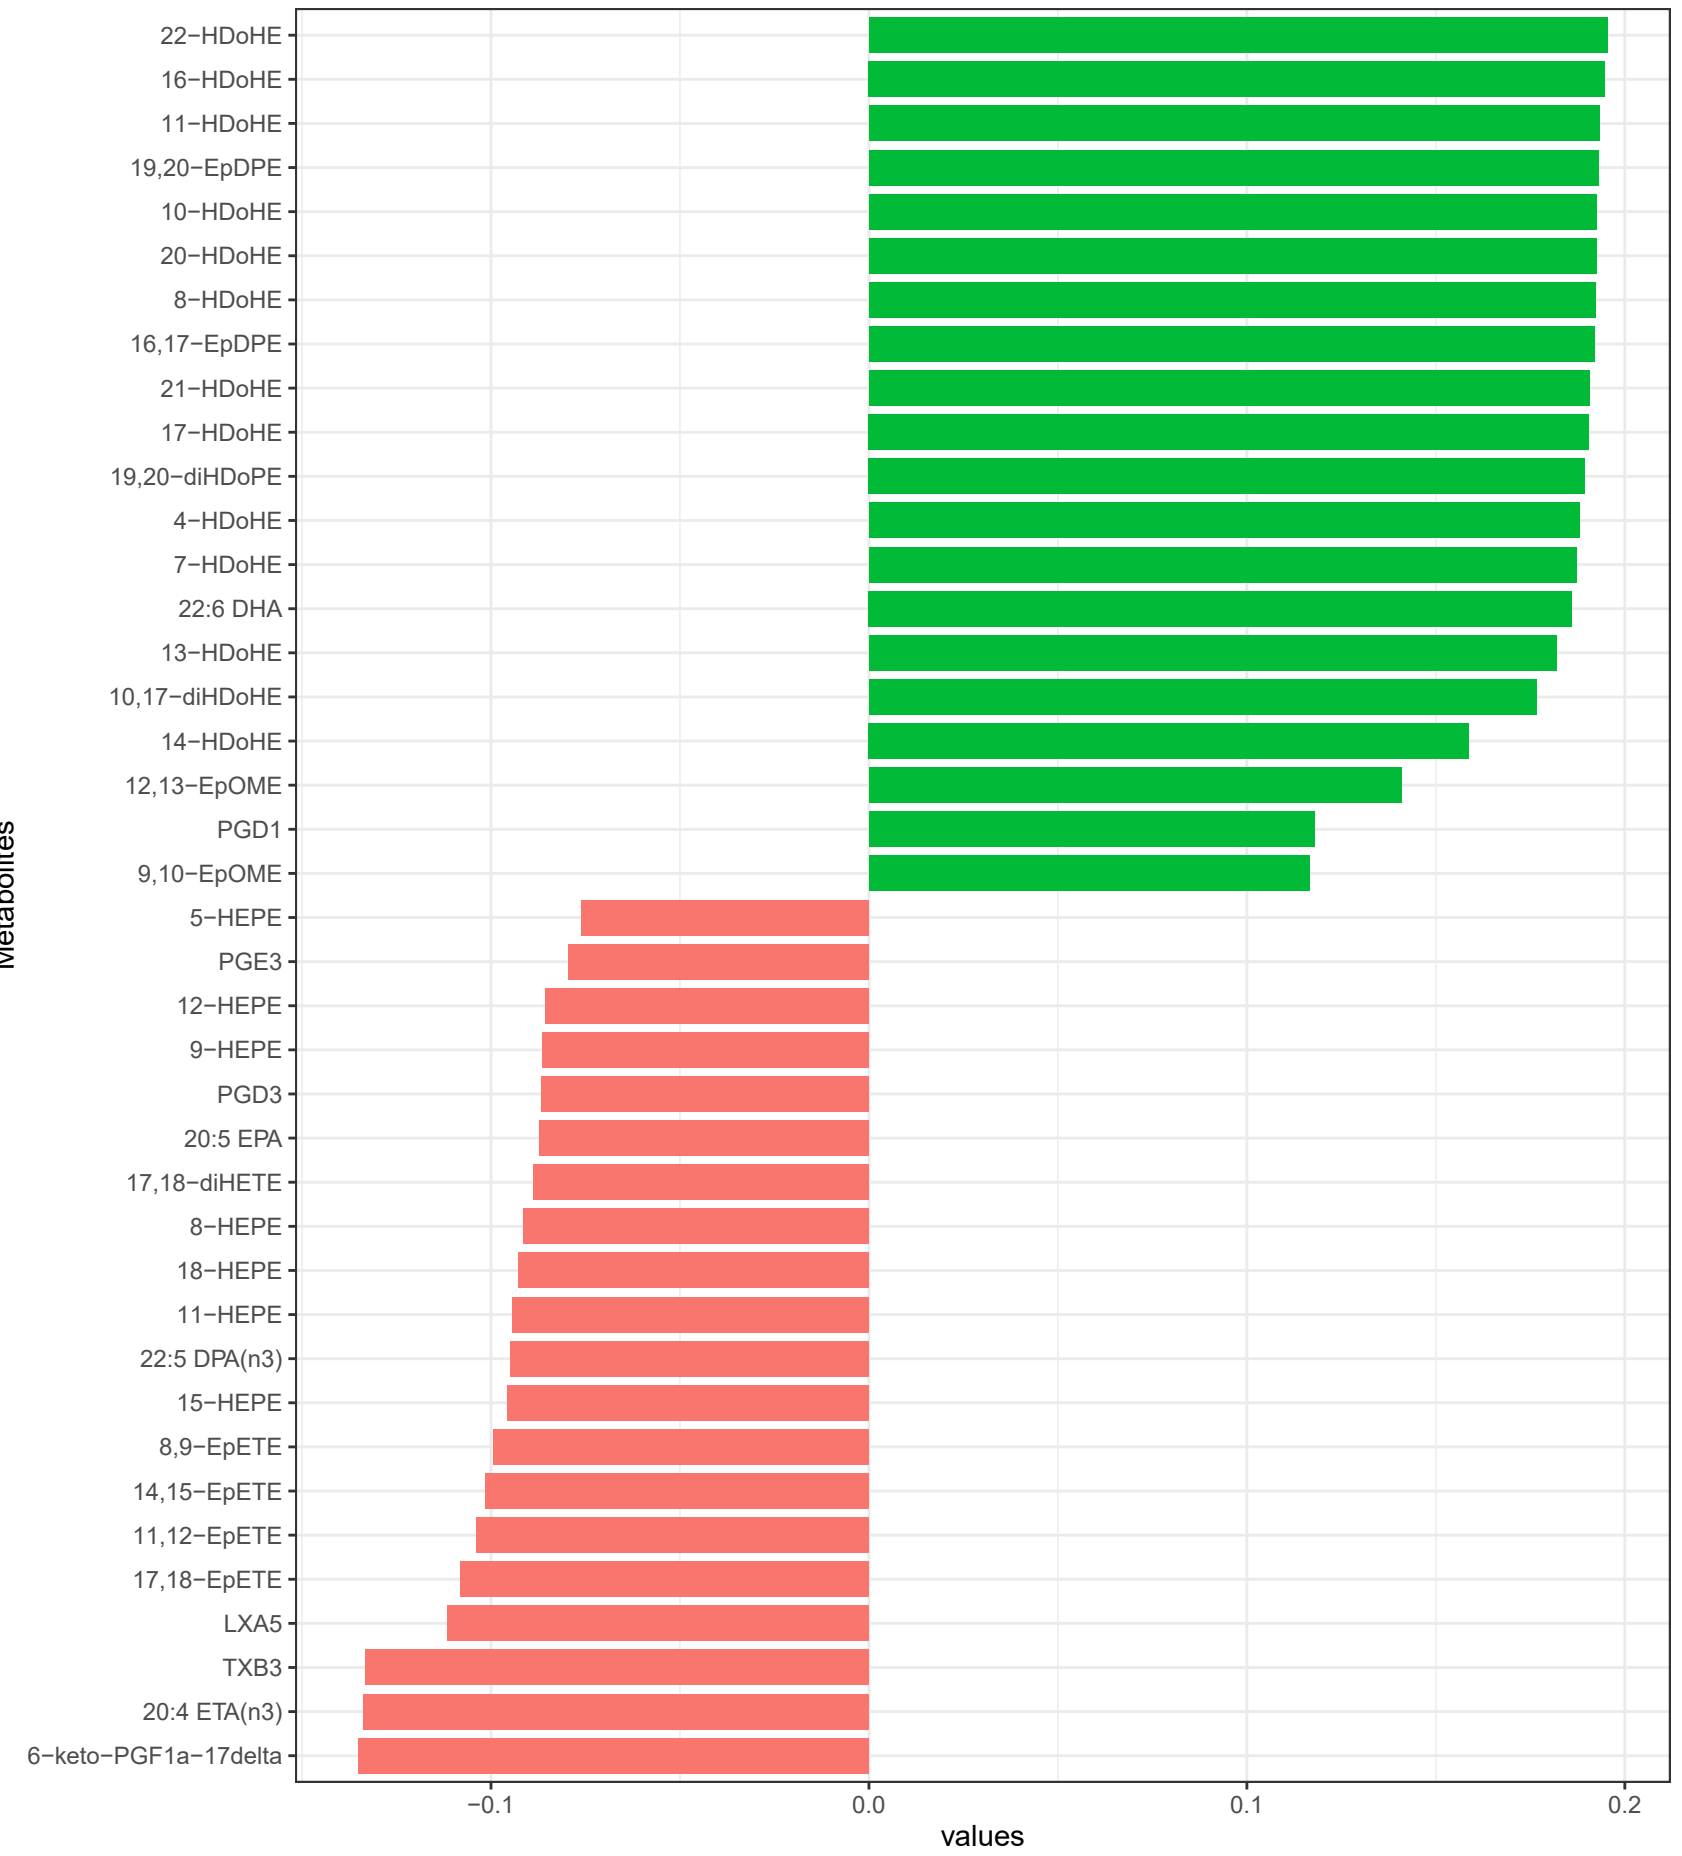

Legend

Positive

Negative

Metabolites

Targeted: Heart PC1 loading plot for Top20 from max/min values

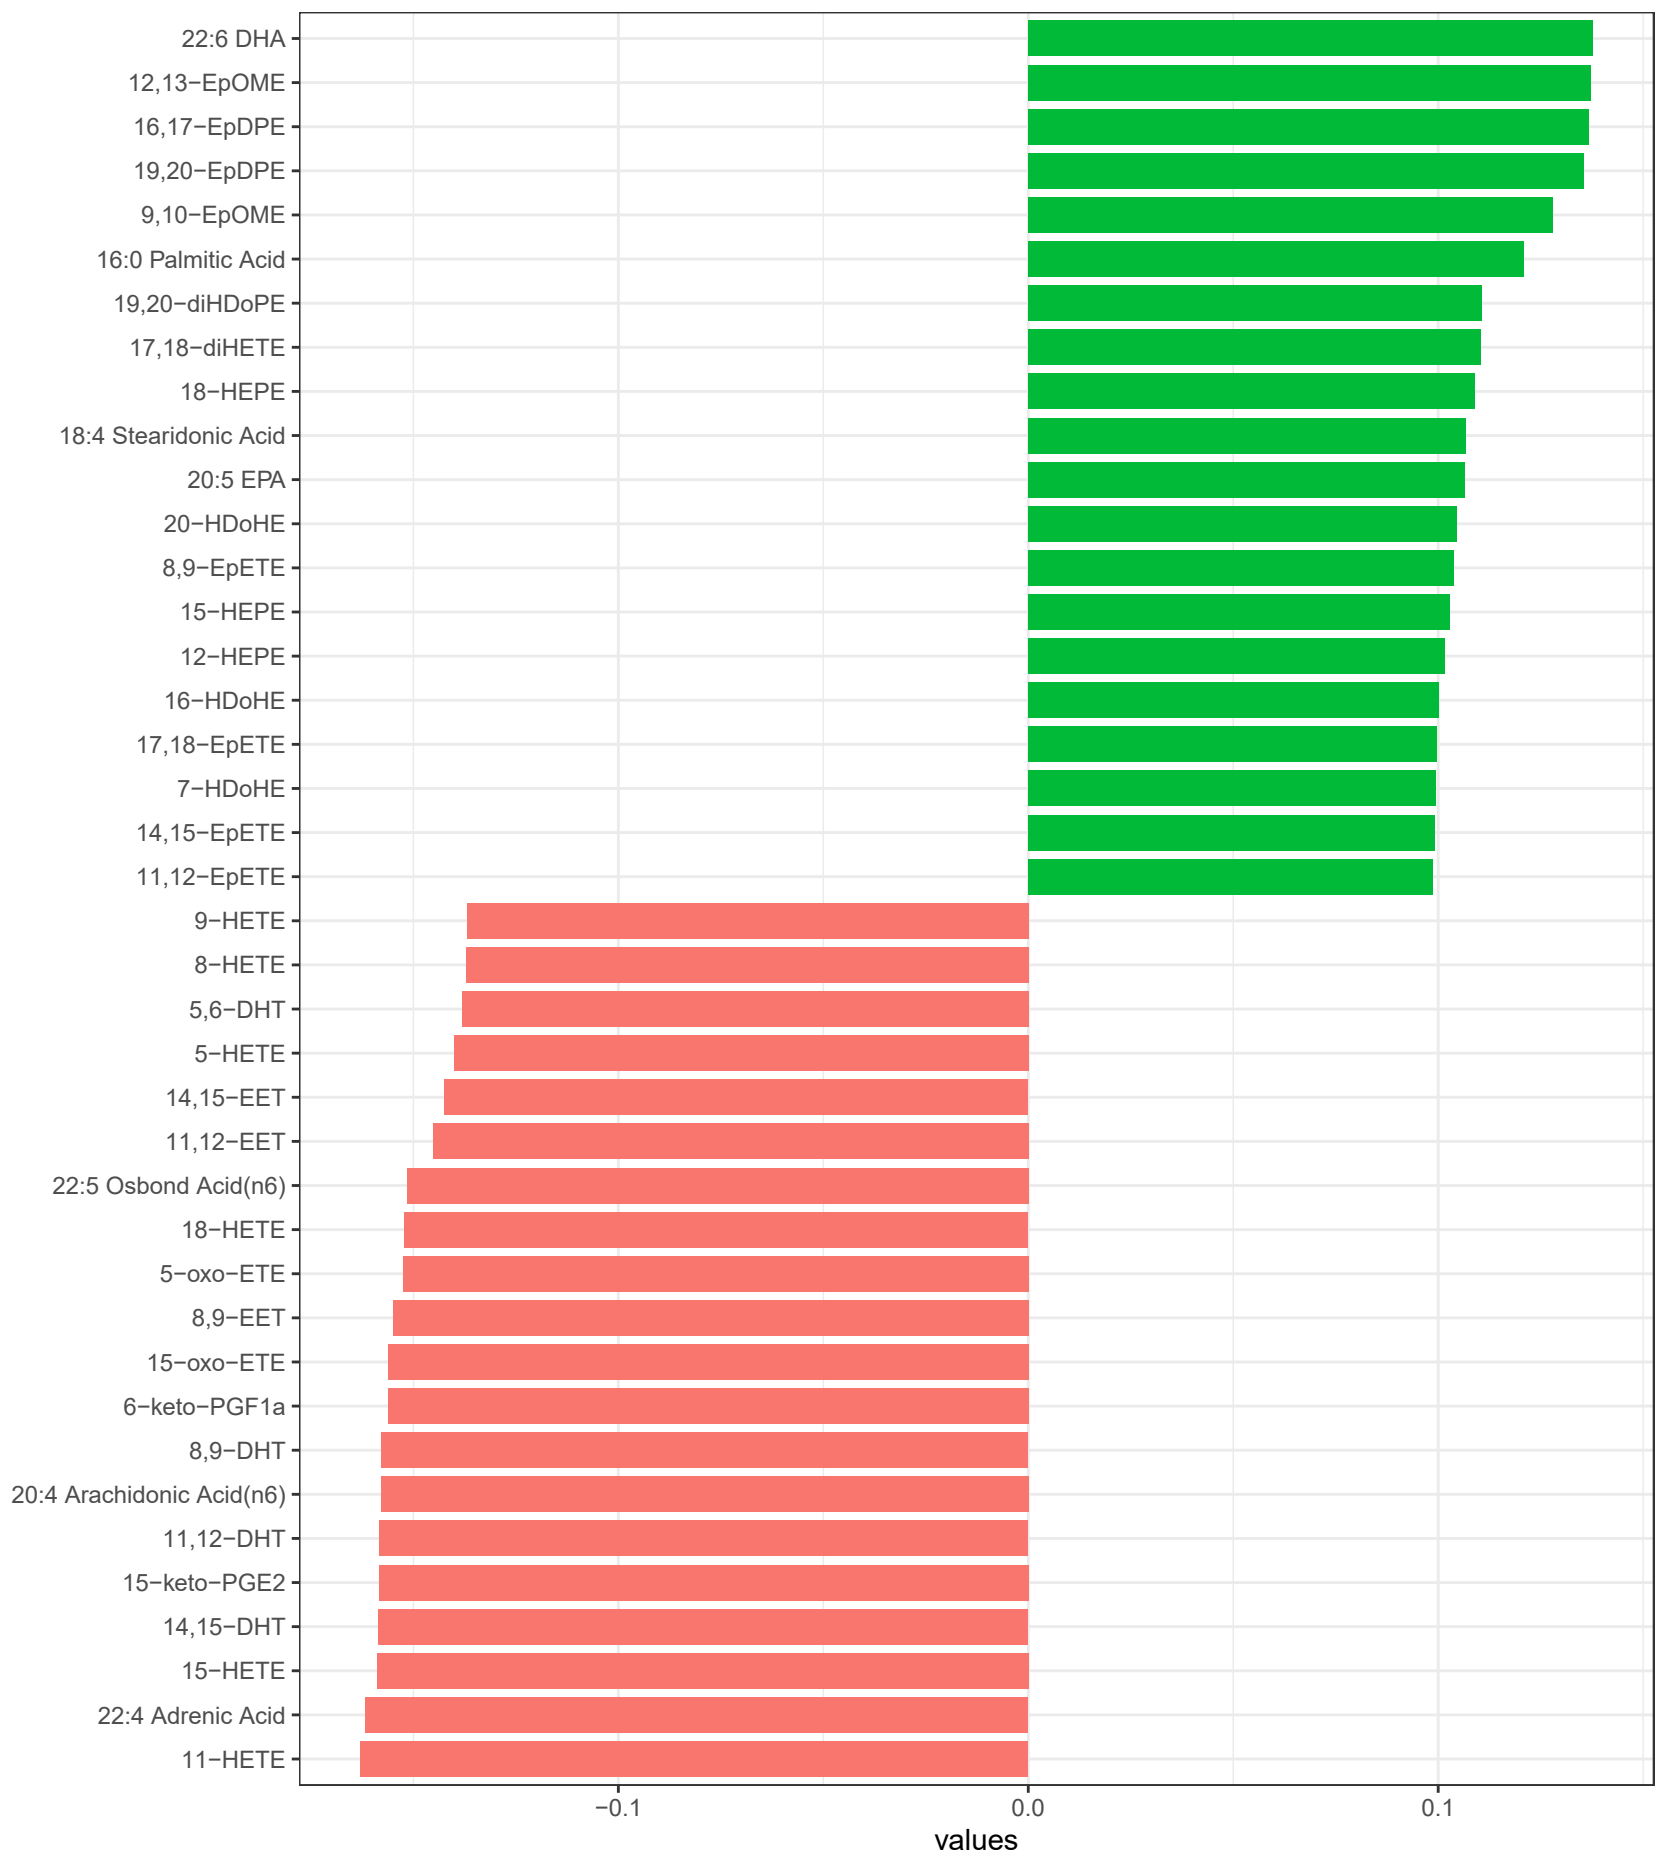

Targeted: Heart PC2 loading plot for Top20 from max/min values

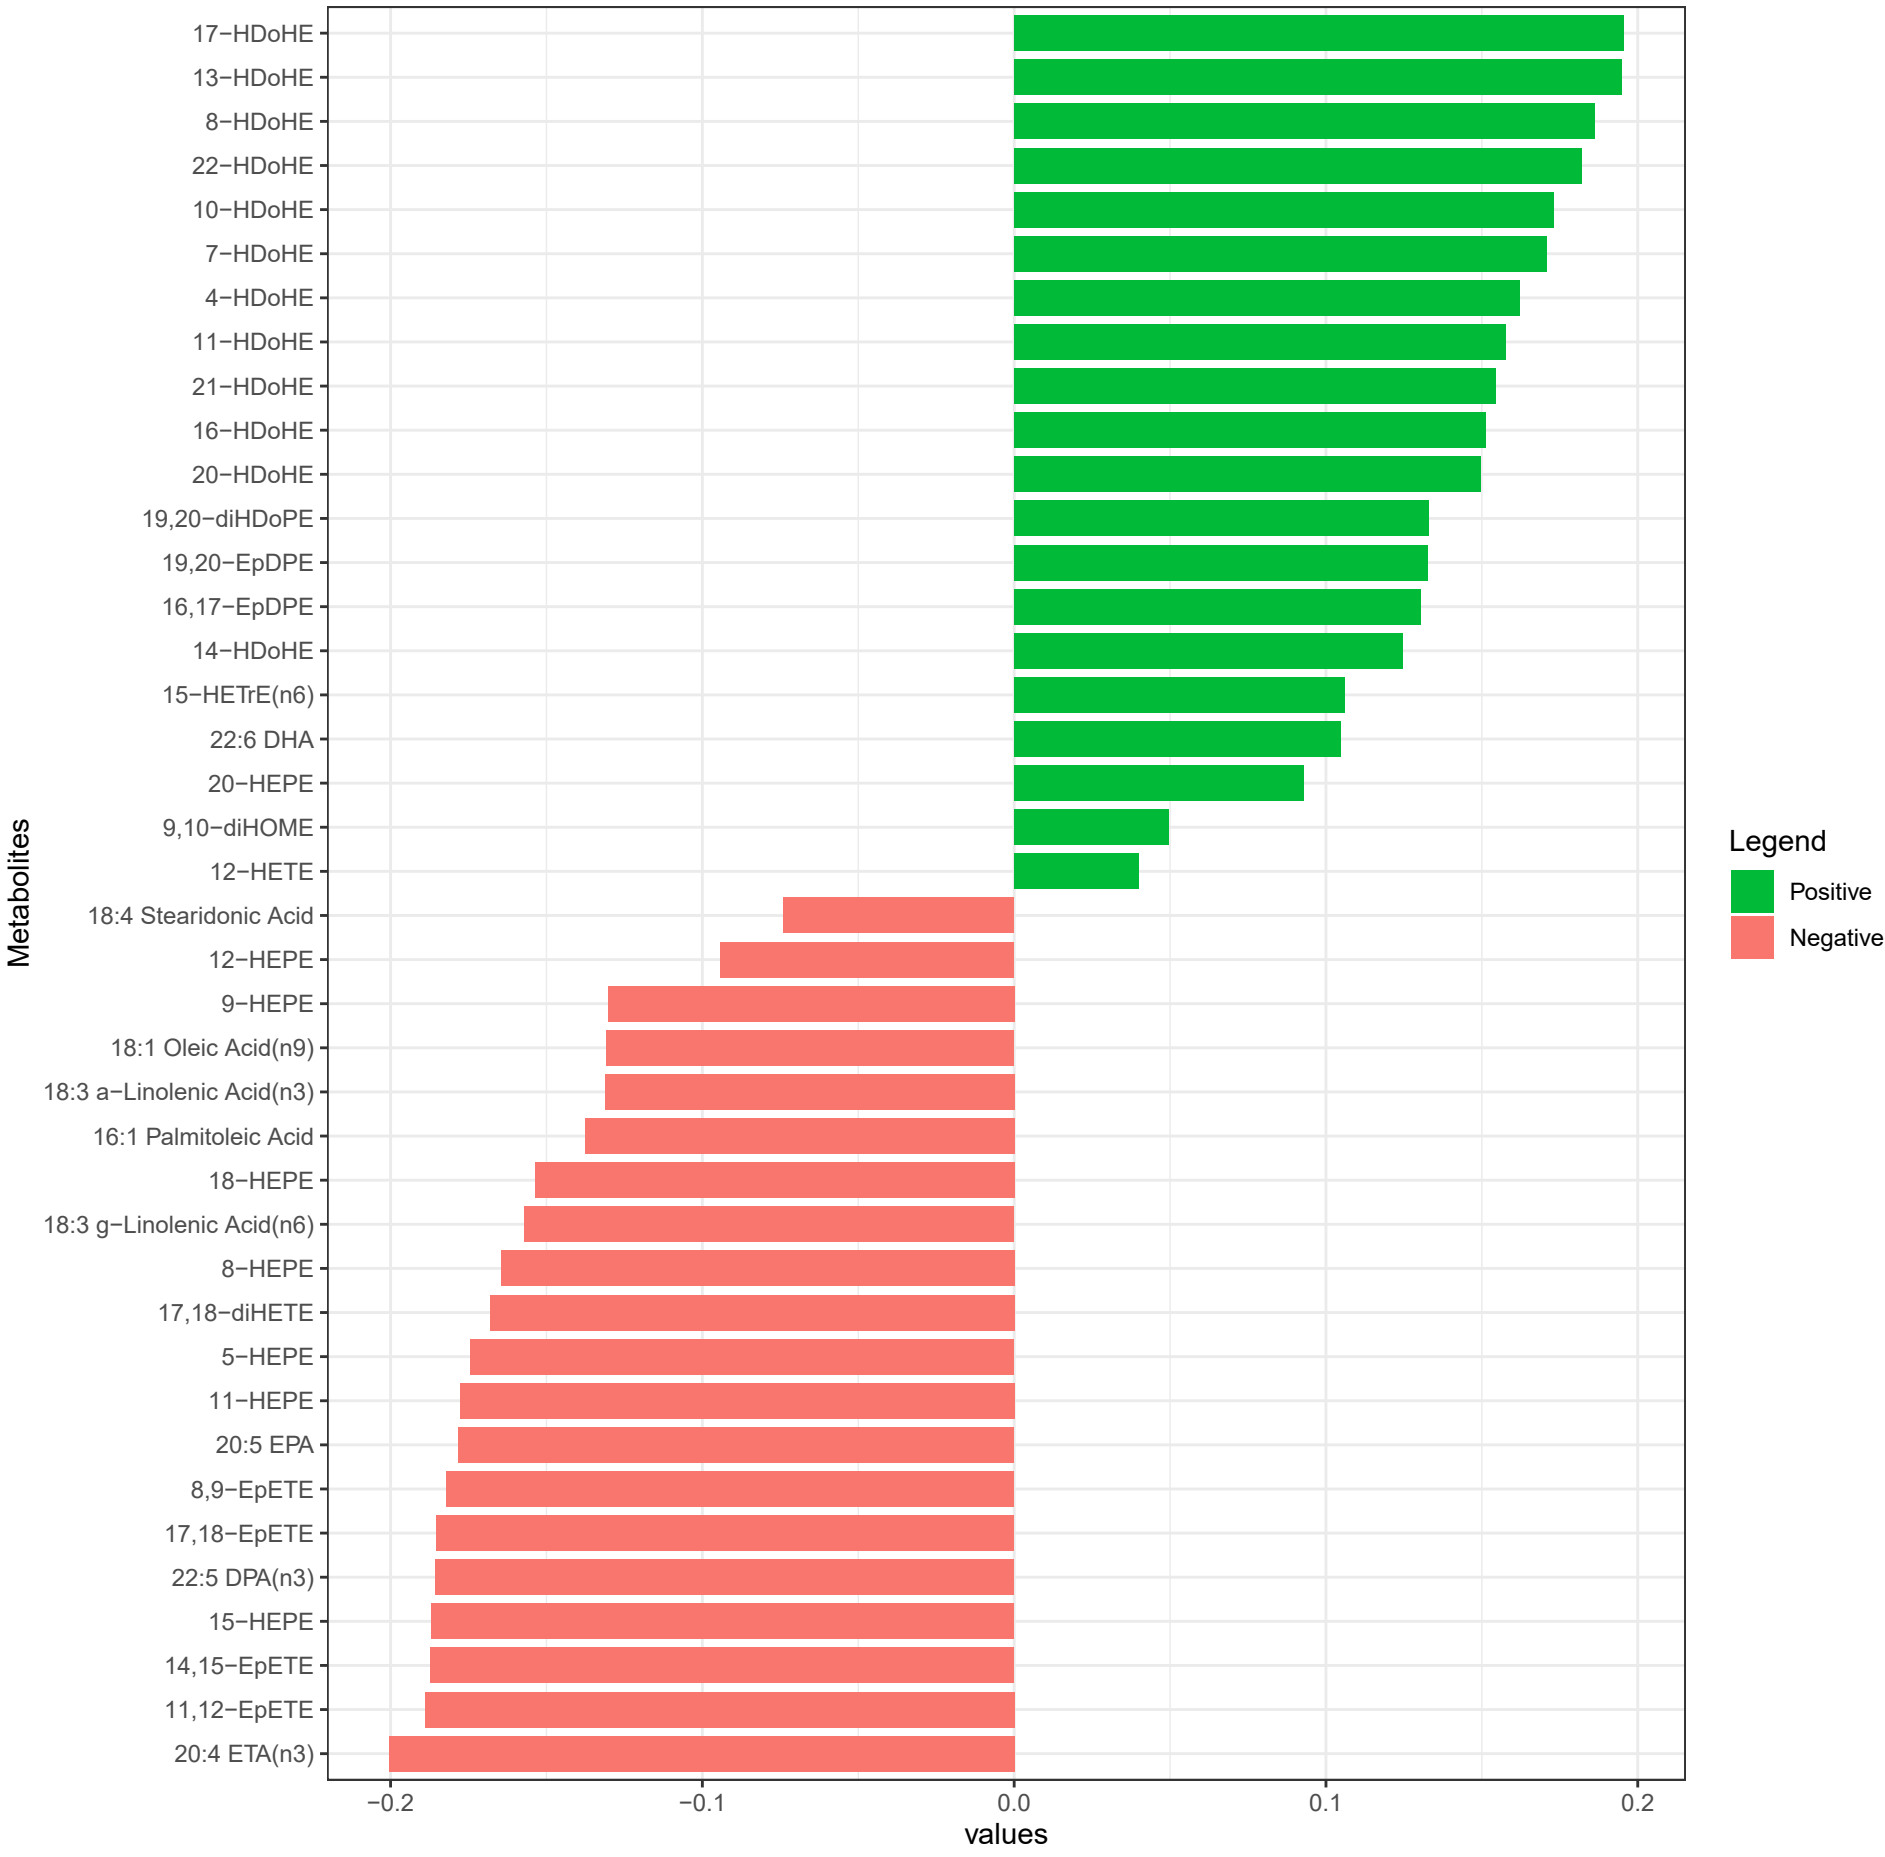

Targeted: Brain PC1 loading plot for Top20 from max/min values

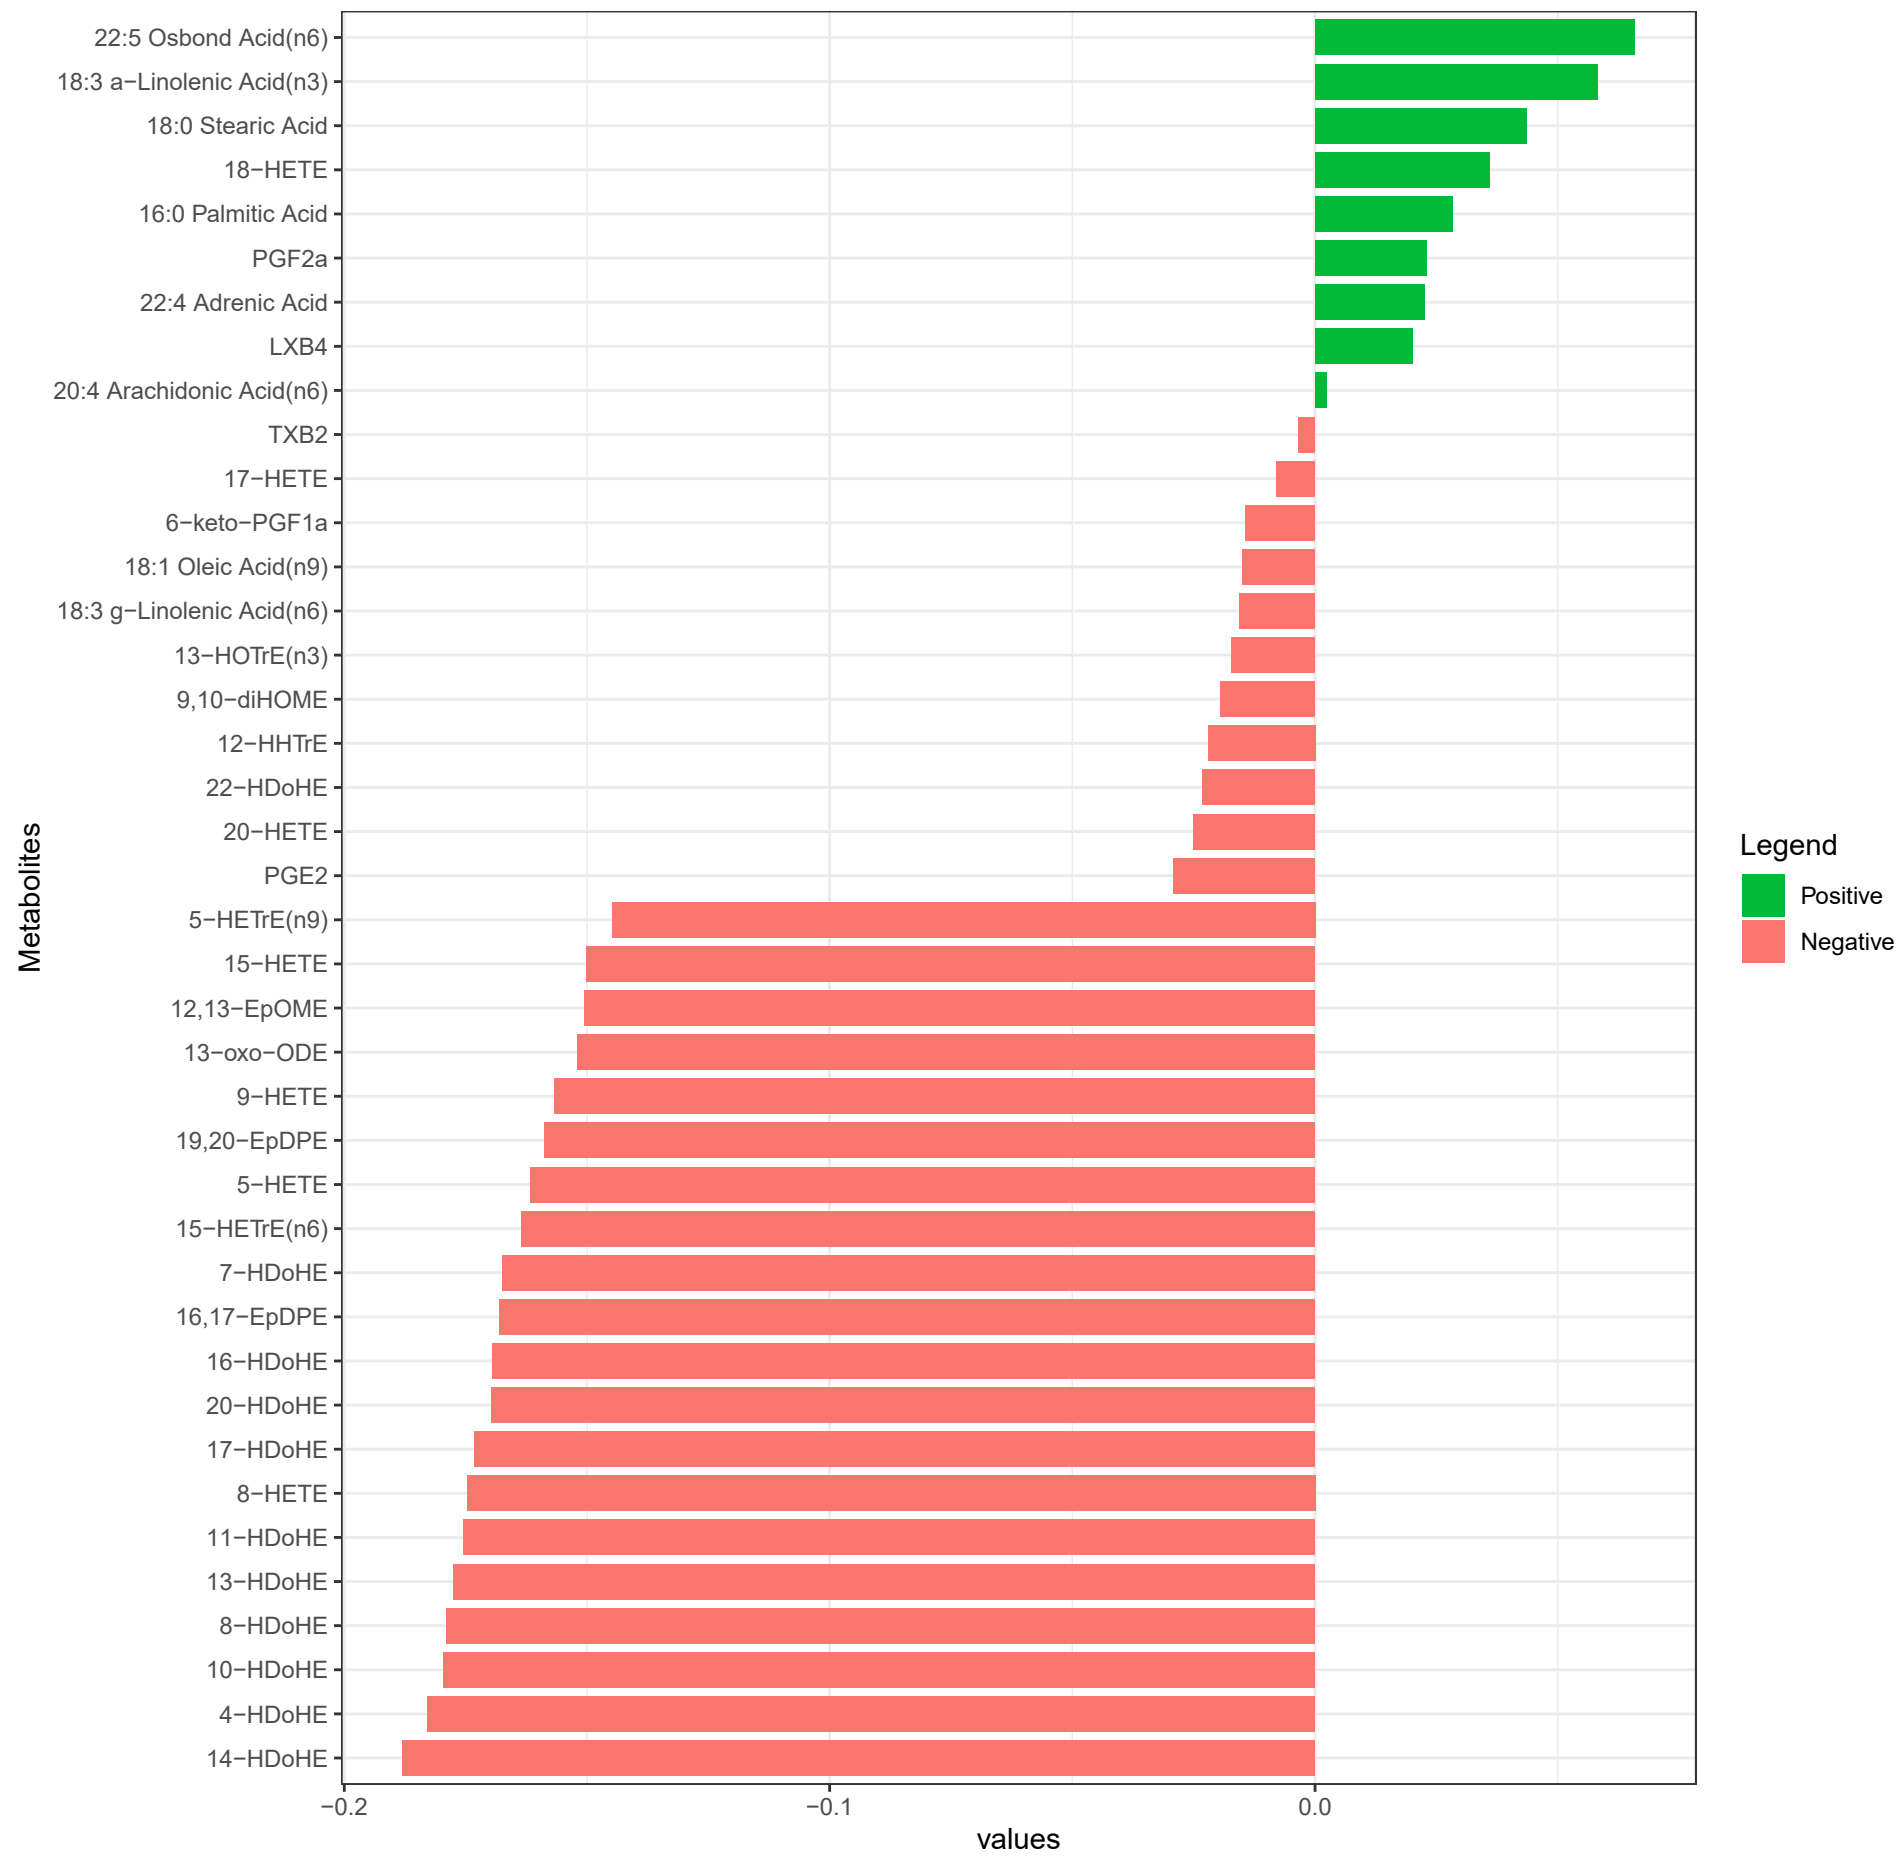

Targeted: Brain PC2 loading plot for Top20 from max/min values

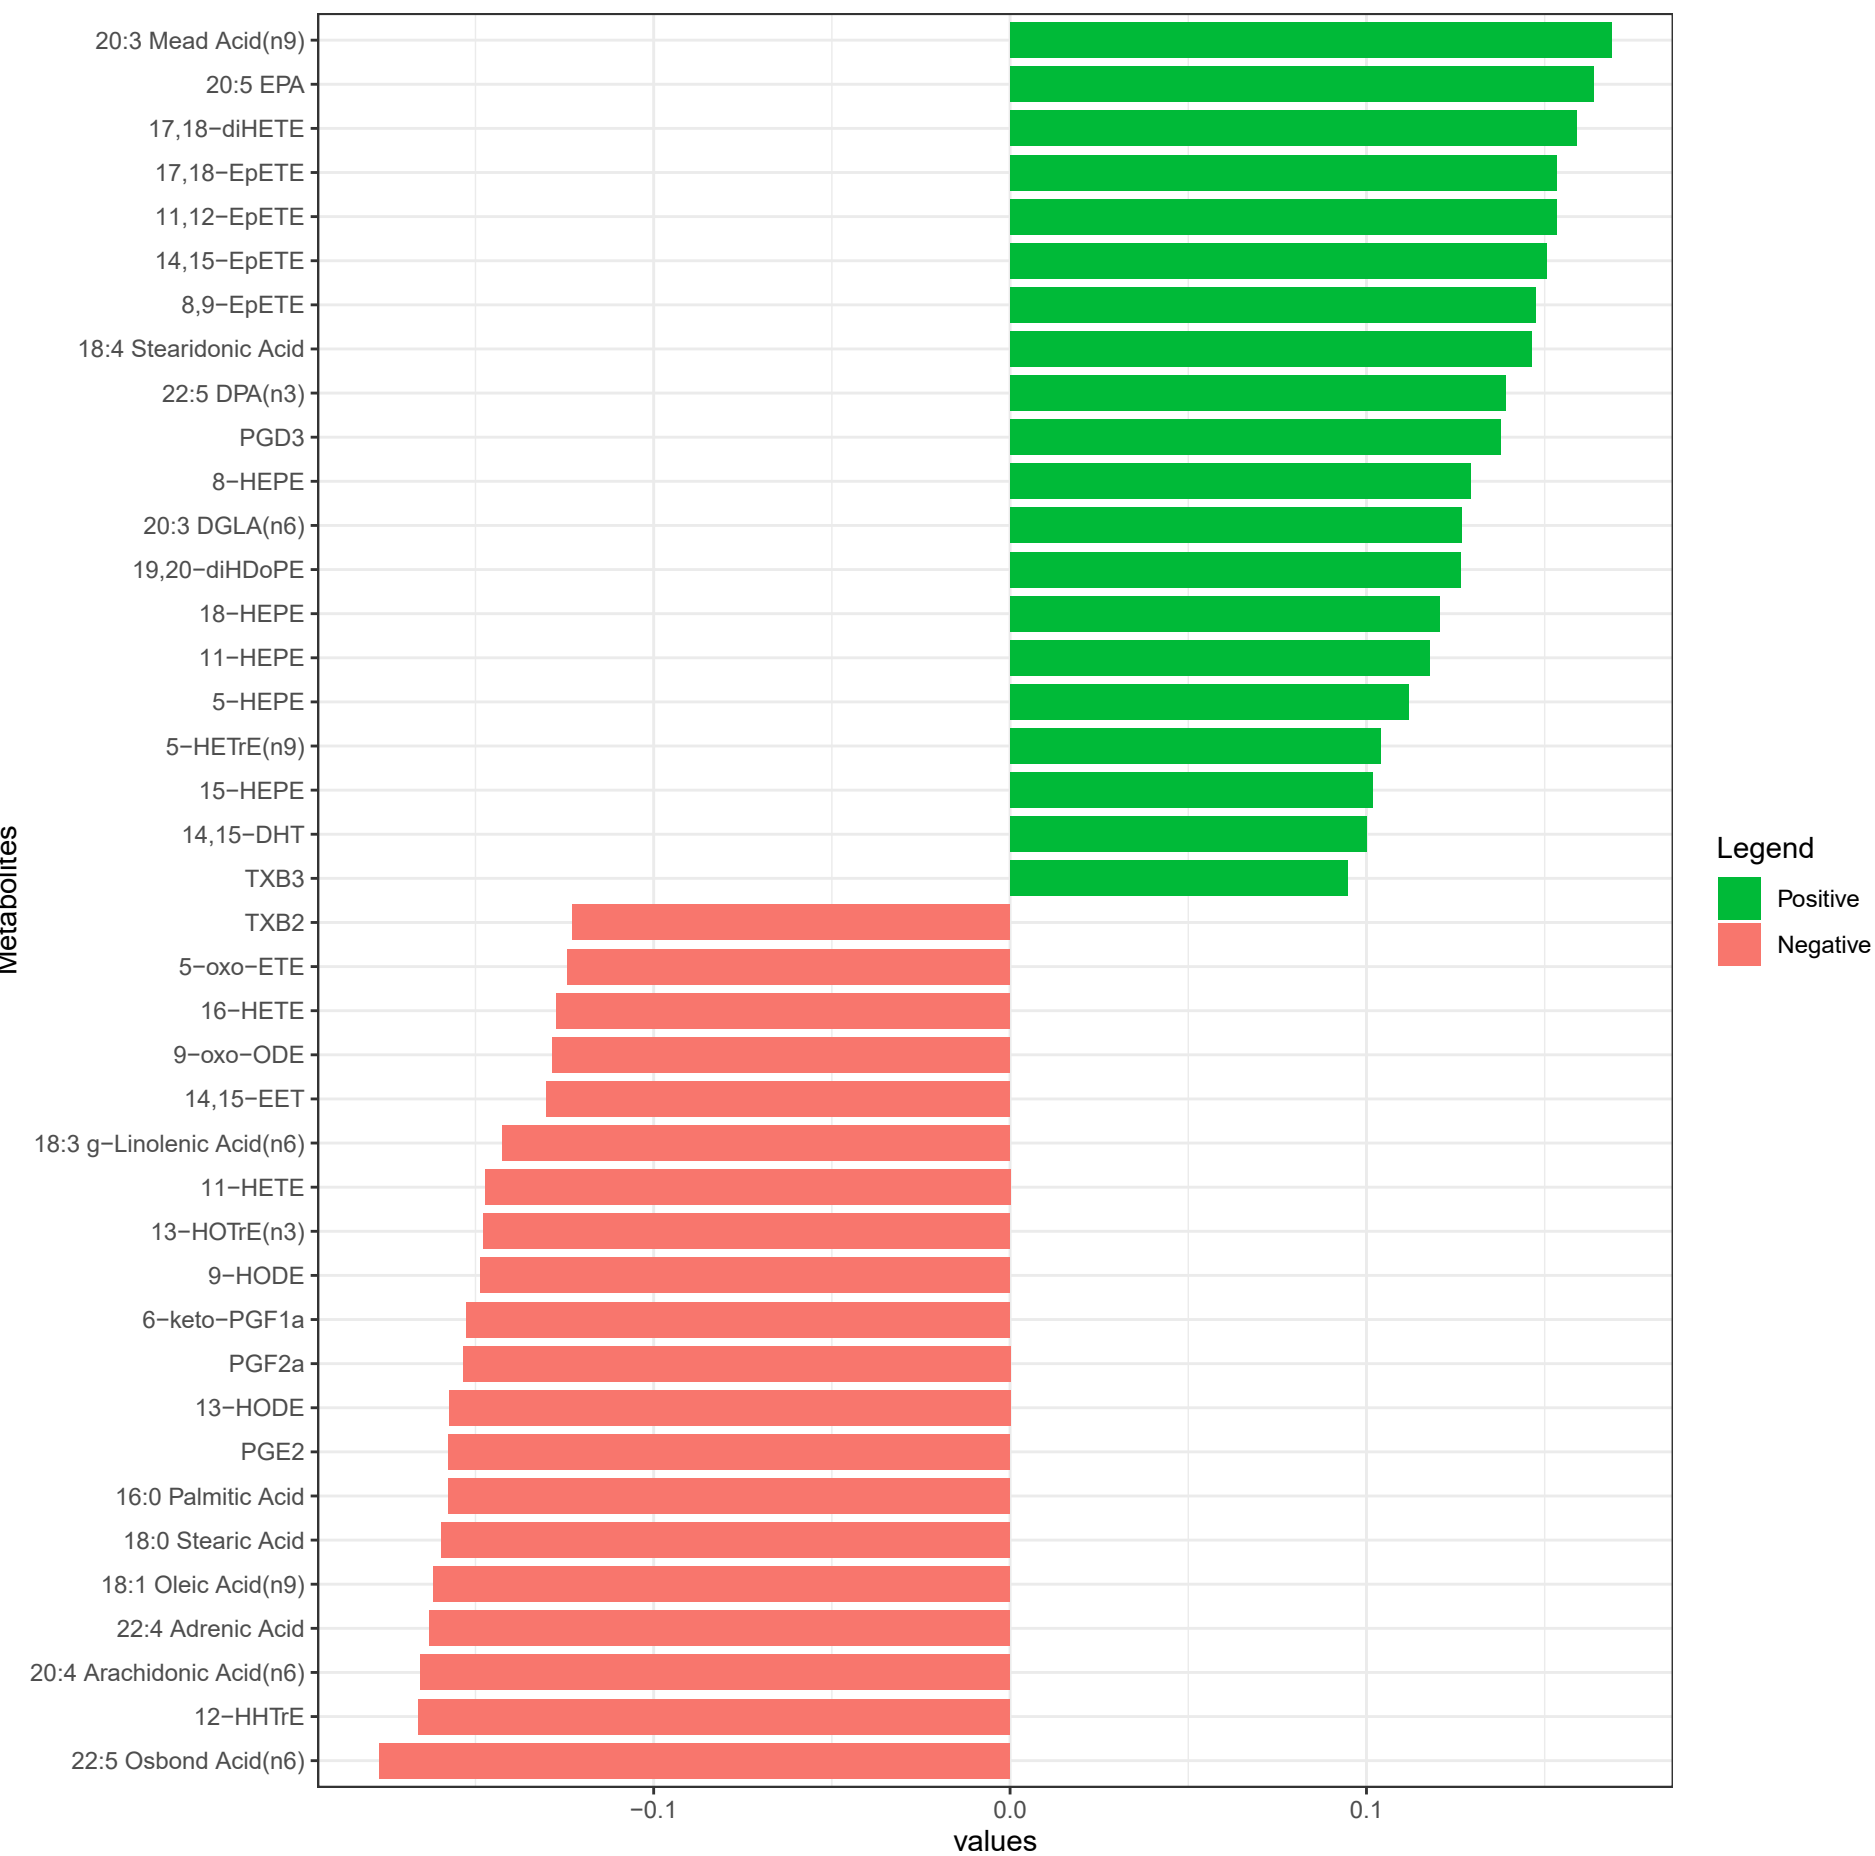

Supplement: s1 [file s1]
