# Supplementary material for: Characterization of Lipid Profiles after Dietary Intake of Polyunsaturated Fatty Acids Using Integrated Untargeted and Targeted Lipidomics
Source: Metabolites. 2019 Oct 21;9(10):241. doi: 10.3390/metabo9100241 (PMC6836067; doi:10.3390/metabo9100241)
Supplement: Supplementary file 1 [file metabolites-09-00241-s001.zip]

Archive with 8 entries (8 files):
- Supplementary Files/Supplementary Figure 1.pdf
- Supplementary Files/Supplementary Figure 2 new.pdf
- Supplementary Files/Supplementary Figure 3 new vs2.pdf
- Supplementary Files/Supplementary Figure 4 new.pdf
- Supplementary Files/Supplementary Figure 5.pdf
- Supplementary Files/Supplementary Table 1 new.xlsx
- Supplementary Files/Supplementary Table 2 new.xlsx
- Supplementary Files/Supplementary Table 3 new.xlsx
