# Supplementary material for: Characterization of Lipid Profiles after Dietary Intake of Polyunsaturated Fatty Acids Using Integrated Untargeted and Targeted Lipidomics
Source: Metabolites. 2019 Oct 21;9(10):241. doi: 10.3390/metabo9100241 (PMC6836067; doi:10.3390/metabo9100241)
Supplement: Supplementary file 1 [file metabolites-09-00241-s001.zip › Supplementary Files/Supplementary Table 1 new.xlsx]

## Sheet: Sheet1
Conposition of the diet (%, w/w)
Moisture	8
Crude protein	21.5
Crude fat	4.4
Crude fiber	2.6
Crude ash	4.9
Nitrogen free extracts	58.6
Fatty acid composition (% of Fat)
Myristic acid (C14:0)	0.4
Palmitic acid (C16:0)	14.9
Palmitoleic acid (C16:1)	0.2
Heptadecenoic acid (C17:1)	0.2
Stearic acid (C18:0)	5
Oleic acid (C18:1)	20.8
Linoleic acid (C18:2)	52.4
Linolenic acid (C18:3)	4.9
Arachidic acid (C20:0)	0.3
Icosenoic acid (C20:1)	0.6
Eicosatetraenoic acid (C20:3 n-6)	0
Arachidonic acid (C20:4)*	NA
Eicosapentaenoic acid (C20:5)	0
Behenic acid (C22:0)	0.3
Erucic acid (C22:1)	0
Docosapentaenoic acid (C22:5)	0
Docosahexaenoic acid (C22:6)	0
The detail follows the certificate of Funabashi Farm Co.,Ltd.
* The amount of arachidonic acid was not examined in this study. The amount of arachidonic acid in the same diet was reported as 'not detected' in the previous study.(Hashimoto, M.; Tozawa, R.; Katakura, M.; Shahdat, H.; Haque, A. M.; Tanabe, Y.; Gamoh, S.; Shido, O. Protective effects of prescription n-3 fatty acids against impairment of spatial cognitive learning ability in amyloid β-infused ra…
