# Supplementary material for: Characterization of Lipid Profiles after Dietary Intake of Polyunsaturated Fatty Acids Using Integrated Untargeted and Targeted Lipidomics
Source: Metabolites. 2019 Oct 21;9(10):241. doi: 10.3390/metabo9100241 (PMC6836067; doi:10.3390/metabo9100241)
Supplement: Supplementary file 1 [file metabolites-09-00241-s001.zip › Supplementary Files/Supplementary Table 2 new.xlsx]

## Sheet: LC-MS condition
1. Ion source
	MS：QTRAP5500（ABsciex）
	Parameter			Value
	CUR			20
	TEM			450℃
	Gas1			15
	Gas2			50
	Ion Spray Voltage			-4500
	CAD（Collision Gas）			Medium
2. MRM general setting
	Scan type			：Scheduled MRM（Basic）
	Polarity			：Negative
	Duration			：40min
	MRM detection window			：150sec
	Target scan time			：1.3sec
	Pause between mass ranges			：3msec
3. Column
1	Column：ACQUITY UPLC BEH C18 1.7uM 1.0x150mm Column
2	Guard column：ACQUITY UPLC BEH C18 1.7uM VanGUARD（Waters）
			Pre-Column 3/Pk 2.1x5mm Column
4. LC
	LC		:Waters UPLC I-class
	Mobile phase A		：0.1%FA in H2O
	Mobile phase B		：ACN/MeOH=4/1
	Column temperature		:35℃
	Temperature in sample rack		:5℃
	Injection volume		:1mL
	Gradient
	Flow rate（mL/min）	Time（min）	％B	％A
	0.05	0	27	73
	0.05	5	27	73
	0.05	15	70	30
	0.05	25	80	20
	0.08	30	80	20
	0.1	33	80	20
	0.1	35	95	5
	0.1	39	100	0
	0.05	40	27	73
	0.05	47.5	27	73

## Sheet: MRM condition
Name	Q1	Q3	RT	DP	EP	CE	CXP
001__PGE2	351.174	271.2	14.4	-35	-10	-22	-23
002__PGD2	351.162	271.1	14.8	-60	-10	-24	-25
003__PGD2	351.162	189	14.8	-55	-10	-26	-25
004__15-keto-PGE2	349.15	234.8	14.8	-55	-10	-22	-15
007__15-deoxy-PGJ2	315.143	271.1	20.3	-55	-10	-18	-15
008__PGF2a	353.2	193.1	14	-55	-10	-34	-15
009__6-keto-PGF1a	369.18	163.1	12	-40	-10	-36	-13
010__TXB2	369.102	169	13.5	-55	-10	-24	-9
011__TXB2	369.102	194.8	13.5	-55	-10	-20	-25
012__12-HHTrE	279.097	179	19	-60	-10	-18	-19
013__12-HHTrE	279.097	135.2	19	-60	-10	-18	-9
014__LTB4	335.178	194.9	17.9	-35	-10	-22	-15
025__LXA4	351.169	114.9	15.3	-55	-10	-22	-11
026__LXA4	351.169	217.1	15.3	-55	-10	-26	-17
027__LXB4	351.145	221.1	14.4	-50	-10	-22	-17
028__5-HETE	319.01	114.9	23.7	-65	-10	-20	-11
029__5,6-EET	319.192	191.1	25.9	-70	-10	-16	-13
030__5,6-DHT	337.204	144.8	20.8	-65	-10	-22	-14
031__8-HETE	319.177	154.9	22.8	-90	-10	-18	-13
032__9-HETE	319.185	123	23.3	-110	-10	-22	-17
033__8,9-EET	319.188	154.9	25.5	-35	-10	-16	-11
034__8,9-DHT	337.195	126.9	20	-55	-10	-28	-9
035__11-HETE	319.171	166.9	22.4	-70	-10	-20	-13
036__12-HETE	319.156	179	22.7	-25	-10	-18	-11
037__11,12-EET	319.179	167	25.1	-75	-10	-18	-17
038__11,12-DHT	337.172	167	19.5	-70	-10	-26	-7
039__15-HETE	319.156	219	21.8	-50	-10	-20	-15
040__14,15-EET	319.181	218.9	24.4	-65	-10	-16	-15
041__14,15-DHT	337.183	207.1	18.9	-60	-10	-24	-19
042__16-HETE	319.165	233.2	21	-70	-10	-18	-11
043__16-HETE	319.165	189	21	-70	-10	-20	-13
044__17-HETE	319.16	247	20.8	-75	-10	-20	-15
045__17-HETE	319.16	203	20.8	-75	-10	-22	-9
046__18-HETE	319.193	261.2	20.6	-90	-10	-22	-21
047__18-HETE	319.193	217.2	20.6	-90	-10	-22	-13
048__19-HETE	319.159	275	20.4	-75	-10	-24	-15
049__19-HETE	319.159	231.2	20.4	-75	-10	-24	-13
050__20-HETE	319.171	289.1	20.4	-120	-10	-24	-27
051__5-oxo-ETE	317.13	203.3	25.2	-80	-10	-24	-5
053__12-oxo-ETE	317.125	179.2	23.1	-30	-10	-26	-17
054__15-oxo-ETE	317.15	113	22.3	-45	-10	-24	-9
056__5,6-diHETE-1	335.174	219	20.4	-70	-10	-22	-13
064__PGE3	349.161	233	13.3	-50	-10	-16	-23
065__PGE3	349.161	189	13.3	-35	-10	-22	-17
066__PGD3	349.157	188.9	13.7	-75	-10	-26	-19
069__PGF3a	351.161	191.1	13	-60	-10	-34	-19
070__6-keto-PGF1a-17delta	367.177	207	10.3	-45	-10	-28	-11
071__TXB3	367.175	168.8	12.3	-65	-10	-24	-5
072__TXB3	367.175	194.7	12.3	-80	-10	-22	-9
077__LXA5	349.153	115	14.2	-55	-10	-20	-11
078__LXA5	349.153	215.2	14.2	-55	-10	-26	-9
082__RvE2	333.127	114.9	16.1	-65	-10	-18	-17
083__5-HEPE	317.12	115	21.4	-70	-10	-18	-17
086__8-HEPE	317.126	154.9	20.6	-85	-10	-20	-15
087__9-HEPE	317.147	148.9	20.9	-50	-10	-22	-7
088__9-HEPE	317.147	122.9	20.9	-50	-10	-20	-9
089__8,9-EpETE	317.161	155.1	22.8	-85	-10	-14	-19
091__11-HEPE	317.179	167	20.3	-85	-10	-22	-11
092__11-HEPE	317.179	194.8	20.3	-90	-10	-18	-29
093__12-HEPE	317.158	179	20.7	-60	-10	-18	-13
094__12-HEPE	317.158	135.2	20.7	-55	-10	-20	-13
095__11,12-EpETE	317.149	166.9	22.6	-85	-10	-16	-11
097__15-HEPE	317.159	219	20.3	-45	-10	-18	-19
098__15-HEPE	317.159	175	20.3	-50	-10	-20	-17
099__14,15-EpETE	317.232	207.1	22.4	-90	-10	-16	-15
101__18-HEPE	317.188	259.3	19.9	-40	-10	-16	-9
102__18-HEPE	317.188	215.3	19.9	-40	-10	-18	-13
103__17,18-EpETE	317.192	258.9	21.9	-55	-10	-16	-29
104__17,18-diHETE	335.165	246.9	17.7	-65	-10	-24	-23
105__17,18-diHETE	335.165	203.2	17.7	-50	-10	-24	-21
107__20-HEPE	317.19	287.1	19.6	-60	-10	-20	-9
152__RvD1	375.143	140.8	15.3	-35	-10	-20	-17
153__RvD1	375.143	214.8	15.3	-35	-10	-26	-19
154__RvD2	375.133	174.8	14.6	-35	-10	-30	-9
155__RvD2	375.133	215	14.6	-35	-10	-24	-9
158__4-HDoHE	343.167	100.9	24.1	-40	-10	-16	-35
161__7-HDoHE	343.193	141.1	22.9	-55	-10	-14	-13
162__8-HDoHE	343.224	189	23.2	-55	-10	-16	-11
165__10-HDoHE	343.202	153	22.4	-70	-10	-24	-21
166__11-HDoHE	343.18	121.1	22.6	-80	-10	-20	-13
167__11-HDoHE	343.18	148.9	22.6	-80	-10	-18	-19
170__13-HDoHE	343.185	193	22	-40	-10	-18	-15
171__14-HDoHE	343.206	205	22.2	-50	-10	-18	-17
172__14-HDoHE	343.206	161	22.2	-50	-10	-20	-9
175__16-HDoHE	343.164	233.1	21.7	-65	-10	-20	-9
176__17-HDoHE	343.194	245.1	21.9	-35	-10	-16	-21
177__17-HDoHE	343.194	201.1	21.9	-35	-10	-20	-17
178__16,17-EpDPE	343.213	233	24.5	-50	-10	-16	-9
180__20-HDoHE	343.192	241.1	21.4	-45	-10	-18	-27
181__19,20-EpDPE	343.207	241.1	24.1	-55	-10	-18	-21
182__19,20-diHDoPE	361.194	229.3	19	-30	-10	-24	-21
183__21-HDoHE	343.184	255	21	-65	-10	-18	-19
184__22-HDoHE	343.167	269.1	21.1	-65	-10	-20	-17
195__7,17-diHDoHE	359.14	119.1	17.6	-65	-10	-20	-9
196__10,17-diHDoHE	359.154	153	17.5	-30	-10	-22	-15
200__14,20-diHDoHE	359.199	233.1	17.1	-85	-10	-20	-21
201__14,20-diHDoHE	359.199	205	17.1	-85	-10	-20	-21
262__9-HODE	295.157	170.9	21.5	-60	-10	-26	-17
263__9,10-EpOME	295.133	171	24.6	-65	-10	-22	-5
264__9,10-diHOME	313.17	201	18.7	-65	-10	-30	-19
265__13-HODE	295.155	195	21.4	-80	-10	-26	-21
266__12,13-EpOME	295.132	195.1	24.3	-65	-10	-20	-15
269__9-oxo-ODE	293.109	185	22.6	-70	-10	-28	-7
270__13-oxo-ODE	293.111	112.9	21.7	-90	-10	-28	-3
272__9-HOTrE(n3)	293.138	170.9	19.7	-65	-10	-22	-13
275__13-HOTrE(n3)	293.108	195	19.9	-60	-10	-24	-19
281__9-oxo-OTrE(n3)	291.117	184.9	20.6	-50	-10	-26	-17
290__13-HOTrE(n6)	293.106	193	20.2	-55	-10	-20	-11
303__PGE1	353.171	235	14.6	-65	-10	-24	-21
304__PGD1	353.179	273.1	14.6	-60	-10	-28	-13
306__TXB1	371.238	171	13.1	-25	-10	-24	-19
308__8-HETrE(n6)	321.186	157	23.7	-115	-10	-20	-9
314__15-HETrE(n6)	321.17	220.9	22.9	-110	-10	-22	-23
318__LTB3	337.169	195.2	19.4	-40	-10	-22	-19
319__5-HETrE(n9)	321.204	115	26.6	-40	-10	-20	-11
355__16:0 Palmitic Acid	255.139	255.139	34.5	-15	-10	-35	-17
356__16:1 Palmitoleic Acid	253.185	253.185	30.1	-60	-10	-34	-15
357__18:0 Stearic Acid	283.191	283.191	37.7	-60	-10	-37	-15
358__18:1 Oleic Acid(n9)	281.133	281.133	35.3	-40	-10	-38	-15
359__18:2 Linoleic Acid	279.131	279.131	31.2	-50	-10	-36	-13
360__18:3 a-Linolenic Acid(n3)	277.139	277.139	28.4	-60	-10	-32	-15
361__18:3 g-Linolenic Acid(n6)	277.105	277.105	28.8	-85	-10	-32	-19
362__18:4 Stearidonic Acid	275.13	231.2	26.3	-60	-10	-25	-17
363__20:3 DGLA(n6)	305.213	261.3	32.7	-45	-10	-32	-11
364__20:3 Mead Acid(n9)	305.201	261	34.1	-60	-10	-20	-23
365__20:4 ETA(n3)	303.153	259.2	29.8	-40	-10	-25	-15
366__20:4 Arachidonic Acid(n6)	303.172	259.2	30.5	-40	-10	-30	-13
367__20:5 EPA	301.133	257.2	28	-55	-10	-28	-23
368__22:4 Adrenic Acid	331.221	331.221	34.5	-60	-10	-37	-19
369__22:5 DPA(n3)	329.217	329.217	31.2	-25	-10	-32	-29
370__22:5 Osbond Acid(n6)	329.219	329.219	32.6	-50	-10	-28	-21
371__22:6 DHA	327.183	283	29.7	-60	-10	-31	-33
374__AA-d8	311.181	267.1	30.2	-35	-10	-20	-21
377__15-HETE-d8	327.106	226.2	21.6	-70	-10	-18	-19
378__LTB4-d4	339.196	197.2	17.8	-60	-10	-22	-13
380__PGE2-d4	355.175	275.1	14.2	-50	-10	-24	-7

## Sheet: Liver pg_100mg
Sample Name	Liver_Control_1	Liver_Control_2	Liver_Control_4	Liver_Control_5	Liver_AA_16	Liver_AA_17	Liver_AA_19	Liver_AA_20	Liver_EPA_6	Liver_EPA_7	Liver_EPA_9	Liver_EPA_10	Liver_DHA_11	Liver_DHA_12	Liver_DHA_14	Liver_DHA_15	Q-values (Control vs ARA)	Q-values (Control vs EPA)	Q-values (Control vs DHA)	Q-values (ARA vs EPA)	Q-values (ARA vs DHA)	Q-values (EPA vs DHA)
002__PGD2	8.08779	15.9146	7.5398	26.0589	36.7976	64.0935	26.7817	35.3422	10.727	6.05028	11.3852	6.43151	13.1201	24.7114	3.65314	7.73718	0.028334	0.253223	0.750601	0.0267098	0.0221422	0.472936
004__15-keto-PGE2	84.3576	44.5944	69.523	51.8634	120.349	133.679	138.494	143.13	25.4216	22.3642	37.5117	36.3436	13.672	0	24.8451	30.5905	0.0004279	0.0162707	0.0067776	3e-06	8.4e-06	0.141204
008__PGF2a	0	0	0	14.0033	0	0	0	0	0	0	0	0	0	0	0	0	0.391002	0.391002	0.391002	No info.	No info.	No info.
011__TXB2	40.5675	69.0227	49.5758	43.7146	63.0313	150.057	28.1392	93.0346	41.1551	27.1539	30.7342	15.21	35.9176	32.8831	28.0781	58.3121	0.29618	0.0374772	0.245032	0.12115	0.144398	0.277762
025__LXA4	0	0	0	0	0	0	0	0	0	0	0	0	0	0	2.35455	0	No info.	No info.	0.391002	No info.	0.391002	0.391002
028__5-HETE	517.762	624.769	1044.56	658.022	2851.26	4461.93	2345.67	3103	236.399	354.577	504.274	366.99	401.762	459.073	960.346	358.501	0.0094976	0.0349761	0.394003	0.0077505	0.0013942	0.277902
029__5,6-EET	71.3019	79.0592	76.022	48.5584	266.239	266.578	283.369	205.656	25.5684	0	13.2711	13.1474	20.2581	35.4699	46.9848	22.2577	5.36e-05	0.0006662	0.0069076	9.9e-06	1.73e-05	0.0660833
030__5,6-DHT	86.5082	68.8962	55.086	62.4144	746.218	719.241	638.698	775.684	27.3137	45.572	47.6377	25.523	38.1643	29.9977	75.8072	52.9197	0.0001118	0.0119271	0.166977	0.0001102	6e-07	0.316417
031__8-HETE	179.809	203.878	180.386	157.487	480.234	877.516	518.486	633.057	127.785	64.4715	82.0134	86.4962	97.3333	51.2847	262.633	102.864	0.0148754	0.0015203	0.345906	0.0084354	0.0025698	0.455611
032__9-HETE	258.935	301.894	349.109	166.813	551.085	1579.91	954.719	1337.08	50.0503	51.176	16.0712	33.4801	62.5212	69.4299	144.297	51.0345	0.032007	0.0078294	0.0054325	0.0177152	0.0194326	0.100193
033__8,9-EET	5090.87	5512.21	4579.22	2866.18	19966	24705.5	22022.6	15337.7	2211.26	1268.75	1230.77	1628.97	2245.75	1575.63	2213.07	2110.08	0.0002408	0.0033502	0.0062415	0.0022164	0.0024939	0.152893
034__8,9-DHT	111.042	123.901	69.8684	44.5681	352.062	322.037	390.914	548.64	23.7608	33.2175	22.5122	32.6829	26.6921	10.5217	85.3881	54.5269	0.0010614	0.0463272	0.130926	0.0049307	0.0005066	0.398538
035__11-HETE	177.257	133.549	140.845	85.3038	337.44	471.634	411.746	439.494	21.1257	41.4753	19.3969	16.5091	44.9452	31.1454	94.3257	33.2601	0.000179	0.0014445	0.013277	0.0006068	2.87e-05	0.148075
036__12-HETE	327.993	257.868	241.934	290.705	524.524	938.933	595.137	564.532	194.591	76.9015	134.955	72.744	121.684	239.869	158.612	89.1787	0.0267251	0.0035382	0.014798	0.0017023	0.0024713	0.480887
037__11,12-EET	7571.31	9143.4	6487.55	4434.01	30658.2	34820.5	34843.8	23949.5	2669.17	1903.19	2293.91	2654	3676.19	2460.63	3000.14	3392.62	0.0001212	0.0177647	0.0102021	0.0014812	0.0015382	0.0567437
038__11,12-DHT	133.277	151.658	118.53	59.3859	367.555	402.579	400.624	523.585	31.1045	39.6475	34.587	37.2965	58.0201	48.9325	72.1163	62.378	0.0002409	0.0272597	0.0657682	0.0014485	0.0015574	0.003024
039__15-HETE	269.4	185.267	316.799	172.053	487.65	577.982	584.252	761.226	75.879	82.9393	39.3334	43.3377	100.127	48.6237	157.424	83.9816	0.0015313	0.0028855	0.0154388	0.0019479	0.0001766	0.191483
040__14,15-EET	15752.8	21464.3	15573.8	9496.1	56935.4	69874	55803.9	42496.5	6092.25	4180.56	4091.64	5501.16	6217.04	6275.64	7110.06	6357.89	0.0005502	0.0203216	0.0333872	0.0026029	0.0029641	0.0296347
041__14,15-DHT	600.123	465.194	471.132	187.754	1515.22	1675.45	1386.22	1585.73	120.712	189.677	112.678	117.401	194.154	193.343	297.109	227.573	4.5e-05	0.039342	0.0654283	6e-07	1e-06	0.0224522
042__16-HETE	90.0366	148.186	111.486	68.0811	122.294	175.329	211.253	240.658	26.6755	11.9831	18.627	23.8816	74.2438	15.9916	54.5074	6.43538	0.0353512	0.0142566	0.0291482	0.0066879	0.0025185	0.356446
044__17-HETE	20.4931	28.0483	0	7.64716	60.7563	16.601	41.2892	24.1311	18.7076	0	11.2705	14.6871	21.3679	25.062	0	37.2925	0.112947	0.713102	0.516769	0.0601755	0.282917	0.30673
046__18-HETE	17.4359	36.6406	0	12.9738	66.8506	57.0161	39.7162	33.1618	64.6017	54.4603	20.2211	39.231	41.6192	29.5529	24.743	50.3677	0.0243076	0.0638346	0.0835693	0.725481	0.24033	0.501652
050__20-HETE	0	0	71.6283	0	174.485	187.282	82.8398	59.4447	79.9857	100.898	0	63.4382	0	0	0	45.2438	0.0260138	0.176351	0.766011	0.14537	0.0151155	0.0886892
051__5-oxo-ETE	278.8	220.444	218.175	106.869	301.387	297.969	261.014	470.399	33.5601	24.0794	42.858	29.3359	14.4916	47.3163	41.6443	26.4413	0.0755061	0.0162424	0.0148269	0.0074266	0.0068521	0.998637
053__12-oxo-ETE	0	0	0	0	0	0	0	343.37	0	0	0	9.07091	0	0	0	0	0.391002	0.391002	No info.	0.402124	0.391002	0.391002
054__15-oxo-ETE	326.526	278.282	270.565	131.575	393.415	342.615	290.558	404.155	74.4186	47.5348	85.6326	46.2957	55.8239	35.8879	63.9599	44.7076	0.0755659	0.0178032	0.0159978	4.26e-05	0.0008561	0.292895
077__LXA5	0	0	0	0	0	0	0	0	57.5045	45.6931	55.1057	72.1245	10.7086	24.7588	25.665	22.0009	No info.	0.0018278	0.0091493	0.0018278	0.0091493	0.0012652
082__RvE2	0	0	0	0	0	0	0	0	0	0	47.0508	23.4319	28.256	14.0903	68.9561	0	No info.	0.215507	0.158135	0.215507	0.158135	0.604072
083__5-HEPE	69.7205	115.78	118.026	92.7022	65.0999	90.2364	61.9949	156.366	1211.23	1837.99	1571.61	846.575	477.228	691.348	1178.85	732.412	0.82696	0.0097252	0.0195036	0.0093083	0.0181952	0.0624221
086__8-HEPE	22.9482	15.9859	14.8912	4.23009	20.8443	15.3905	7.16493	18.0546	443.415	320.443	141.906	197.945	148.478	91.8499	336.133	148.251	0.867021	0.0298109	0.0518903	0.0301597	0.0527072	0.31147
087__9-HEPE	50.3412	56.8935	70.7415	0	0	66.5504	49.4613	0	904.052	947.163	450.197	761.49	596.969	285.401	522.922	297.414	0.526297	0.0070434	0.0151101	0.0064894	0.0131079	0.0481419
088__9-HEPE	0	0	0	36.2121	0	0	27.669	47.2264	830.491	867.935	469.669	571.173	306.697	226.756	517.089	222.174	0.533802	0.0058898	0.0198225	0.005984	0.0210538	0.0219616
089__8,9-EpETE	936.625	535.308	377.302	312.809	681.457	528.642	483.319	280.509	19869.5	10231.2	4925.84	12227	10865.4	4758.94	4573.2	7557.94	0.782199	0.0355625	0.0221079	0.0352811	0.0220237	0.205081
091__11-HEPE	66.0833	34.7339	63.0421	30.2439	9.74714	18.6083	12.1161	22.6981	420.838	760.515	302.817	429.092	312.991	93.5456	567.753	194.652	0.0155145	0.021647	0.0966626	0.0181588	0.0734174	0.237578
093__12-HEPE	42.6349	19.8956	29.623	116.803	32.2976	119.785	13.9603	21.1388	433.571	356.356	360.656	300.601	217.896	96.2563	312.437	158.264	0.874511	0.000115	0.0302624	0.0001358	0.0286873	0.0207343
095__11,12-EpETE	1697.13	942.969	649.91	461	769.725	562.365	525.064	385.822	23719.8	13731.8	8431.74	14178.6	8234.21	4576.11	6394.02	7831.82	0.231444	0.0210008	0.0005451	0.0199307	0.0046974	0.0458081
097__15-HEPE	49.4601	0	44.187	19.9514	34.3676	0	0	0	493.28	542.597	305.998	399.425	273.632	158.362	441.994	210.501	0.215524	0.0034237	0.0270495	0.003305	0.0225703	0.0885987
099__14,15-EpETE	3254.12	1609.14	1898.94	1382.13	1696.11	1127.69	1076.73	790.417	59601.4	30706.5	14571.7	35178.3	17854.2	9763.81	11995.6	17925.5	0.109886	0.0381948	0.0080346	0.0358771	0.0075409	0.111228
101__18-HEPE	53.4299	17.3006	23.6325	11.6183	16.2257	11.3316	13.2417	0	398.396	276.713	161.718	222.706	279.192	126.161	419.246	238.346	0.152934	0.0161004	0.0274034	0.0146361	0.0240891	0.991705
103__17,18-EpETE	4079.54	2738.77	1572.71	1195.71	2381.41	1308.87	1599.42	911.166	64812.9	38475.4	18376.5	41906.6	18563.4	11602.9	13837.9	17006	0.2846	0.0268636	0.0002721	0.02559	0.0024631	0.072229
105__17,18-diHETE	1458.54	803.724	589.964	234.666	464.075	1070.52	579.04	1231.78	2255.44	5277.2	1820.8	4145.4	3656.44	3396.27	6112.29	5847.34	0.845453	0.0221837	0.0019067	0.0485245	0.0017952	0.248617
107__20-HEPE	135.674	0	128.212	0	176.974	224.037	155.577	93.4244	637.427	184.794	211.976	256.584	674.749	232.882	366.233	514.281	0.0846073	0.0627995	0.0099012	0.19332	0.0282624	0.416258
158__4-HDoHE	547.321	295.183	385.932	204.518	269.254	308.605	211.999	337.629	443.29	413.874	582.263	509.648	1458.77	1276.28	1736.12	1552.23	0.365306	0.167287	7.64e-05	0.0043881	1.77e-05	6.12e-05
161__7-HDoHE	67.2322	81.7662	110.167	47.3438	42.8955	69.7044	48.1148	72.354	117.952	134.881	86.7505	63.2538	615.313	261.071	830.609	354.372	0.272004	0.289606	0.0417366	0.0527986	0.0380944	0.0477541
162__8-HDoHE	252.945	284.881	206.163	181.049	189.402	219.504	169.982	223.279	353.352	317.572	187.883	207.386	2007.63	874.166	2509.77	1316.01	0.290539	0.479689	0.0279736	0.172117	0.0266527	0.0292915
165__10-HDoHE	55.5139	35.949	50.2235	24.2219	30.7724	28.5096	27.5885	34.2008	81.8317	52.9972	37.4533	66.0237	499.408	223.354	1239.15	335.724	0.211855	0.176021	0.102072	0.0513706	0.0976908	0.10973
166__11-HDoHE	122.477	72.7286	103.532	81.4292	64.5659	114.741	85.7391	86.4497	168.496	146.054	99.5991	90.9946	1182.97	458.676	1509.99	795.397	0.654304	0.199549	0.0297821	0.120201	0.0291911	0.0323846
170__13-HDoHE	94.6499	90.2081	72.6918	37.1143	47.9846	59.1431	40.1068	83.756	105.938	115.057	67.5794	81.2734	562.682	252.477	901.139	408.746	0.362788	0.312466	0.0450216	0.0536687	0.0416059	0.0501691
171__14-HDoHE	75.243	61.0528	47.0366	78.083	19.7122	27.8221	33.1032	44.6494	72.0122	98.5537	69.6399	69.0167	570.811	267.586	1140.26	340.831	0.0085415	0.280841	0.080057	0.0019954	0.0692029	0.0843834
175__16-HDoHE	133.348	82.3308	112.049	41.8169	84.4306	56.0925	92.0216	88.1623	159.21	117.295	86.1178	96.3242	1007	385.367	1248	516.766	0.590005	0.416216	0.0408277	0.105268	0.0396302	0.0445649
176__17-HDoHE	322.235	270.986	284.174	145.026	222.746	296.218	264.665	325.502	334.753	268.815	280.829	226.145	1364.18	681.147	1636.24	1003.08	0.641892	0.637879	0.0200071	0.9914	0.0226591	0.0226625
178__16,17-EpDPE	10717.8	8857.25	6730.1	5434.24	9900.85	10443.5	9729.87	6118.3	17345.9	8471.9	8317.94	11587.1	57658.4	32984.6	54702.5	55861.6	0.493745	0.19726	0.0043235	0.346074	0.004955	0.0007495
180__20-HDoHE	233.111	265.697	184.348	157.025	113.301	165.889	154.775	179.208	338.953	287.814	224.76	204.986	2044.29	721.838	2649.28	1143.02	0.0907032	0.215463	0.0460034	0.0166647	0.041893	0.0504552
181__19,20-EpDPE	12898	14697.2	14558.8	7289.44	20172.3	21526	19334.3	13325.9	31511.7	15013.3	17348.8	19445.2	99370.1	57053.8	98959.9	101996	0.047793	0.0823353	0.0049628	0.604195	0.0063244	0.0009531
182__19,20-diHDoPE	406.502	326.432	189.974	143.448	340.605	359.973	331.864	465.06	307.205	651.847	278.042	443.304	1546.48	1293.32	2400.31	1706.62	0.164299	0.192687	0.000957	0.631864	0.0097776	0.0019622
183__21-HDoHE	119.576	204.299	136.71	82.179	201.994	0	305.929	200.273	468.64	249.266	270.035	292.017	1360.2	678.307	1384.07	1169.29	0.570236	0.0171166	0.0076754	0.129573	0.0014837	0.0029015
184__22-HDoHE	0	0	0	0	0	0	0	0	0	0	0	0	111.009	38.0805	70.9913	117.044	No info.	No info.	0.0197701	No info.	0.0197701	0.0197701
262__9-HODE	697.915	471.635	539.203	346.363	458.776	830.629	361.252	445.774	387.434	427.687	208.476	271.796	803.962	345.639	828.39	455.897	0.938093	0.0769581	0.530748	0.135285	0.618383	0.0748324
263__9,10-EpOME	28689.3	18516.3	18497	10300.2	21024.8	20061.6	26782.1	17754.3	15423.4	9905.8	6417.92	13507	21309.7	15101.9	18112.3	23750.5	0.589898	0.121149	0.8971	0.0107319	0.520021	0.0236923
264__9,10-diHOME	721.759	296.195	358.215	123.041	330.444	256.428	267.456	409.31	200.288	236.565	158.417	247.439	351.842	390.454	470.009	413.288	0.668139	0.284357	0.820312	0.0407482	0.0797662	0.0008528
265__13-HODE	1203.65	1163.73	975.202	715.874	692.885	940.087	703.478	961.517	651.628	677.265	440.134	422.259	1502.4	260.907	2145.22	1136.02	0.203357	0.0115997	0.568493	0.032067	0.350153	0.166657
266__12,13-EpOME	38194.9	24717.4	23698.1	14484.4	21404.6	24453	26958	18040.8	20466	13531.2	8435.7	14839.2	27551.3	16393	23046.4	33031.5	0.643178	0.092201	0.965925	0.0365915	0.588967	0.0475679
269__9-oxo-ODE	3209.12	3025.85	3186.16	1375.88	1689.87	1513.22	1510.29	1747.56	1683.08	1306.23	854.523	1036.75	1723.1	1266.06	2519.65	1462.95	0.0906952	0.0213036	0.116421	0.0828929	0.678808	0.163103
270__13-oxo-ODE	1682.67	922.561	6.34615	5.90437	2.06681	4.72125	1.79545	4.35871	592.25	6.87665	1.4589	4.05683	4.27973	4.73705	3.35402	4.79395	0.206383	0.287293	0.206937	0.388506	0.249778	0.391466
272__9-HOTrE(n3)	45.0516	31.6457	28.104	15.5557	16.7712	30.4695	13.7592	21.8251	19.323	19.712	10.886	15.6257	33.065	15.5154	53.922	16.2827	0.233396	0.0761466	0.97236	0.342499	0.39184	0.23818
275__13-HOTrE(n3)	45.1498	20.4532	31.6944	19.2436	23.6834	27.199	29.0636	51.0274	21.5618	18.4036	17.811	29.4579	47.2961	16.3697	60.8318	36.1495	0.690945	0.309313	0.361585	0.156389	0.534396	0.109506
281__9-oxo-OTrE(n3)	1.25843	13.7875	29.4926	11.0289	7.46099	30.7401	9.01378	1.62624	4.60137	5.63602	9.38505	1.18532	5.68211	6.92105	25.2971	19.0548	0.852393	0.203646	0.96483	0.328989	0.807366	0.123942
290__13-HOTrE(n6)	536.281	96.1544	179.846	169.887	529.564	151.29	386.199	547.15	55.2913	90.7658	87.9242	318.947	693.169	217.345	237.818	418.972	0.284827	0.390246	0.360904	0.0521696	0.937417	0.0904983
314__15-HETrE(n6)	127.528	62.221	81.7319	49.882	47.8935	79.2635	56.5153	92.591	40.8004	28.0882	20.8778	24.0811	54.7781	21.0494	67.9018	43.7289	0.591385	0.0256458	0.140493	0.0108208	0.170836	0.140546
319__5-HETrE(n9)	42.9872	42.6307	0	36.4882	0	0	0	0	0	0	0	0	0	0	32.3012	14.3856	0.0591497	0.0591497	0.191997	No info.	0.225293	0.225293
355__16:0 Palmitic Acid	1.33998e+06	989089	1.43299e+06	1.04901e+06	1.41877e+06	1.48276e+06	1.83089e+06	1.66435e+06	1.0911e+06	954181	930559	1.31047e+06	1.82108e+06	1.20054e+06	1.4129e+06	2.10506e+06	0.0322744	0.382075	0.109334	0.0060967	0.878154	0.0433855
356__16:1 Palmitoleic Acid	137328	39632	83660	52317.2	41889.5	36442.3	60304.2	59235.4	35004.3	26812.5	16145.4	36136.8	53627.8	25821.3	33069.9	71125.9	0.249964	0.104182	0.227727	0.0332964	0.775398	0.173332
357__18:0 Stearic Acid	258567	323340	323864	378459	339776	440511	421647	514849	278385	303579	253352	325539	307130	316107	312989	393545	0.0475048	0.32946	0.733594	0.0121426	0.0579419	0.151864
358__18:1 Oleic Acid(n9)	308700	166225	259030	189525	170477	176275	254936	214430	150542	109175	79893.6	111041	202955	123367	145691	222931	0.506551	0.0161135	0.204502	0.0094972	0.35955	0.0686469
359__18:2 Linoleic Acid	840183	453909	681145	489578	681907	602978	1.03917e+06	791809	513830	423842	390309	604486	731157	557524	657918	966793	0.259476	0.239291	0.404506	0.0320664	0.708036	0.0488132
360__18:3 a-Linolenic Acid(n3)	270868	72820.8	108849	92906.5	163448	120540	260894	160537	132472	92543.3	52700.4	130061	217763	96759.6	120408	292241	0.489616	0.510157	0.504899	0.0793023	0.923257	0.153807
361__18:3 g-Linolenic Acid(n6)	618262	154220	277850	227975	422436	315124	570166	381862	294129	230337	89188.7	317001	478543	246027	289947	666564	0.409804	0.477696	0.501548	0.0435284	0.98526	0.136358
362__18:4 Stearidonic Acid	4979.67	832.93	2189.51	1411.85	4035.84	2885.76	6692.12	3053.57	2565.96	1753.53	1928.58	5966.76	2967.09	1464.48	1061.56	4995.29	0.203688	0.622026	0.840677	0.431886	0.263311	0.756454
363__20:3 DGLA(n6)	86222.9	58562.2	75758.8	60753.6	34233.2	30788.2	48788.8	41765.5	34835	34078.7	30124.9	29224.7	64245.8	38328	53775.9	67739.4	0.0063703	0.0082853	0.174542	0.159576	0.0685318	0.0331631
364__20:3 Mead Acid(n9)	18750.2	8736.71	12949.4	10683.4	2631.48	1932.15	3997	3270.98	2879.62	2706.47	1737.28	1420.12	3627.63	2363.51	3292.05	3657.05	0.0179558	0.0150384	0.0206122	0.223202	0.622807	0.0664371
365__20:4 ETA(n3)	7344.62	3535.63	5000.52	3844.15	4327.99	3514.28	4605.61	4099.01	6131.55	5629.97	3124.11	5965.74	3190.01	2726.29	2511.29	4323.35	0.408673	0.808957	0.117349	0.196758	0.0878544	0.0468664
366__20:4 Arachidonic Acid(n6)	925284	874652	1.09032e+06	922922	2.83493e+06	2.92428e+06	3.67941e+06	3.29442e+06	472690	440561	441981	490807	508737	457405	464428	630912	0.0008891	5.48e-05	0.0004006	0.0007446	0.0005636	0.246863
367__20:5 EPA	186301	76512.6	112267	116254	125243	70083.1	143685	89328.7	1.87384e+06	1.55889e+06	1.1278e+06	1.83269e+06	1.053e+06	619612	695333	1.34112e+06	0.599329	0.0029705	0.016122	0.0030288	0.0157017	0.0311722
368__22:4 Adrenic Acid	18032.7	13522.1	18069.9	12344.9	68071.8	68524.5	111920	87010.5	3443.19	2197.8	1629.09	1958.69	4346.22	2282.64	2857.95	4596.56	0.0063701	0.0001436	0.0002938	0.0042028	0.0043523	0.128581
369__22:5 DPA(n3)	33983.2	17889.4	26726.7	21521.1	28659.6	26655.2	36207.7	33988.6	286086	183515	147232	217294	99639.6	53377.9	82370.8	138986	0.176553	0.0079106	0.0289215	0.0090665	0.0390091	0.0158503
370__22:5 Osbond Acid(n6)	9426.48	8031.42	9036.79	6228.88	40548.2	42286.7	68776.7	50837.1	0	0	294.48	336.635	1418.08	453.603	1207.57	841.761	0.0067743	0.0013332	7.02e-05	0.0043621	0.0045517	0.0119215
371__22:6 DHA	486197	298921	410139	414971	496070	523260	782364	611071	717329	657187	552724	774359	2.29963e+06	1.32247e+06	1.70456e+06	2.72812e+06	0.0372384	0.0042763	0.0133091	0.40198	0.0179323	0.0218644

## Sheet: Plasma pg_100uL
Sample Name	Control_plasma_No.1	Control_plasma_No.2	Control_plasma_No.3	Control_plasma_No.4	Control_plasma_No.5	AA_plasma_No.16	AA_plasma_No.17	AA_plasma_No.18	AA_plasma_No.19	AA_plasma_No.20	EPA_plasma_No.6	EPA_plasma_No.7	EPA_plasma_No.8	EPA_plasma_No.9	EPA_plasma_No.10	DHA_plasma_No.11	DHA_plasma_No.12	DHA_plasma_No.13	DHA_plasma_No.14	DHA_plasma_No.15	Q-values (Control vs ARA)	Q-values (Control vs EPA)	Q-values (Control vs DHA)	Q-values (ARA vs EPA)	Q-values (ARA vs DHA)	Q-values (EPA vs DHA)
002__PGD2	0	0	0	0	0	0	0	0	0	0	0	0	0	0	0.657172	0	0	0	0	0	No info.	0.373901	No info.	0.373901	No info.	0.373901
007__15-deoxy-PGJ2	231.438	154.44	193.854	223.006	236.006	324.307	215.171	350.711	202.949	194.651	295.326	291.066	241.357	133.591	188.786	141.561	119.97	103.908	255.268	89.8708	0.208365	0.536063	0.0838302	0.559935	0.0314948	0.0739403
012__12-HHTrE	3.46676	2.52468	3.57848	3.7128	2.0316	3.49577	4.73806	9.47389	8.2865	8.52941	1.92612	2.96081	0	0	0	0	0	1.91591	0	0	0.0280096	0.0180494	0.0007415	0.0020829	0.0007377	0.438768
028__5-HETE	15.6591	8.71148	8.29291	10.0337	12.9461	49.1429	78.746	63.1299	74.7556	80.5419	3.86415	6.00614	3.14584	4.92764	2.29766	4.24124	3.44785	3.42685	2.05933	2.2376	0.0003806	0.0017608	0.0032355	0.0003356	0.0003382	0.245493
029__5,6-EET	0	0	0	0	0	66.9739	136.342	80.1601	110.778	113.856	0	0	0	0	0	0	0	0	0	0	0.0012264	No info.	No info.	0.0012264	0.0012264	No info.
030__5,6-DHT	5.90402	2.62813	3.15951	3.16023	3.27076	41.0931	67.767	45.0889	57.0243	44.5615	1.68527	2.3424	2.01372	0	2.29099	0	0	0	0	0	0.0005985	0.0269256	0.0033593	0.0005351	0.0005002	0.0182847
031__8-HETE	16.694	13.3236	12.3867	15.492	17.4932	36.7695	63.3262	33.6153	49.0049	63.1118	12.6034	0	19.5678	15.329	0	0	0	0	0	0	0.0051222	0.243159	0.0001012	0.0007196	0.0014433	0.0780903
032__9-HETE	7.26743	0	0	0	0	18.3377	30.3326	18.6798	20.2582	42.7716	0	0	0	0	0	0	0	0	0	0	0.0047719	0.373901	0.373901	0.0052372	0.0052372	No info.
034__8,9-DHT	21.5261	19.0583	5.48209	13.2362	14.4737	46.858	94.676	50.4526	103.068	68.4385	5.02966	8.18481	6.74176	0	9.97225	0	5.76455	6.80493	5.78267	0	0.0057885	0.0270184	0.0078477	0.0038283	0.0034342	0.33893
035__11-HETE	3.92055	2.60297	2.93619	2.54636	2.2172	12.6595	24.0665	20.9495	17.1777	23.2017	1.8503	2.73408	2.28327	1.76489	1.32734	2.13773	1.85161	1.64755	1.94041	0.913663	0.0011962	0.0540214	0.0130087	0.0010251	0.0009797	0.384805
036__12-HETE	140.351	106.265	20.7708	69.1761	83.2152	281.057	934.333	969.137	1716.01	632.265	152.305	127.316	157.356	41.262	77.9584	157.577	75.3945	29.9309	51.8198	28.2082	0.0253852	0.389251	0.633725	0.0281664	0.0238056	0.228985
037__11,12-EET	0	2.02251	0	0	0	6.44444	9.26658	7.12537	8.15739	9.62492	0	0	0	0	0	0	0	0	0	0	5.6e-06	0.373901	0.373901	0.0001807	0.0001807	No info.
038__11,12-DHT	25.905	12.4043	5.078	11.4239	6.9643	35.1641	99.0461	46.7581	116.758	57.2687	4.43356	11.6434	6.97051	4.10341	9.9873	5.12787	8.23316	10.5214	11.0231	3.25056	0.018503	0.2468	0.266048	0.0152278	0.015386	0.925997
039__15-HETE	4.17589	4.90701	2.99516	0	0	20.3486	31.113	27.1315	21.812	23.8035	3.23012	3.43156	4.57615	0	0	0	0	0	0	0	7.2e-06	0.907421	0.0793711	6e-06	0.000213	0.0763009
040__14,15-EET	6.76995	4.64478	0	0	0	13.1187	16.6028	14.102	26.2777	19.8345	0	0	0	0	0	0	0	0	0	0	0.0004783	0.187531	0.187531	0.0016309	0.0016309	No info.
041__14,15-DHT	55.2783	40.4921	8.31482	26.1	23.3963	142.587	348.389	184.237	303.524	194.298	11.0786	33.113	12.84	14.6377	24.5466	14.7182	18.4848	24.4061	26.4281	10.1442	0.0054911	0.238814	0.201416	0.0049873	0.0050628	0.938978
042__16-HETE	2.44459	7.00849	0	5.28553	2.82417	5.39233	8.65621	8.0113	9.37469	13.235	0	3.51414	0	0	0	0	0	0	0	0	0.0148433	0.079644	0.0440656	0.0004666	0.0021404	0.373901
044__17-HETE	4.97876	4.00202	2.00989	0	3.84449	15.1594	25.1123	14.7969	26.2743	27.3161	3.11157	3.8419	5.10861	2.08463	2.89283	1.43977	1.48978	0	5.1906	1.94919	0.0015689	0.676876	0.461422	0.0023229	0.0012925	0.200204
046__18-HETE	12.4123	11.0567	5.85423	10.448	12.1504	41.941	97.956	49.663	86.6685	69.4614	10.7249	20.2723	13.9075	8.02155	14.1587	7.93138	6.62127	9.23994	10.3748	3.93322	0.0049676	0.236574	0.128272	0.0055397	0.0042155	0.0379572
048__19-HETE	47.4445	33.2009	17.7442	24.4919	25.6778	107.315	215.018	113.755	247.584	156.064	23.451	32.2119	18.3582	15.4985	30.9656	21.5108	18.802	20.1784	22.1292	16.4074	0.0067332	0.381024	0.122395	0.0061915	0.0058389	0.274186
050__20-HETE	9.82849	0	0	13.1082	10.2775	29.7369	59.6125	43.0507	67.8949	63.9935	24.8384	33.0645	19.0056	14.3754	16.1083	0	0	0	0	0	0.0003174	0.0095817	0.0744794	0.004192	0.0017988	0.0032052
051__5-oxo-ETE	0	0	0	0	0	0	5.51661	4.38653	4.39474	0	0	0	0	0	0	0	0	0	0	0	0.0733661	No info.	No info.	0.0733661	0.0733661	No info.
053__12-oxo-ETE	0	0	0	0	0	0	0	0	7.59963	0	0	0	0	0	0	0	0	0	0	0	0.373901	No info.	No info.	0.373901	0.373901	No info.
083__5-HEPE	7.78626	3.53732	3.4779	3.68481	7.45186	3.50906	5.17628	4.10664	6.01265	7.42	100.213	129.899	112.74	69.9025	85.3738	25.4866	16.8743	19.3227	22.4761	9.17699	0.963479	0.0007713	0.0018416	0.0007998	0.007081	0.0009838
086__8-HEPE	3.12853	0	0	0	0	0	0	0	0	0	54.8158	56.061	56.4819	23.5511	35.4626	14.4	11.4967	8.70031	9.98035	4.33204	0.373901	0.0025361	0.0008651	0.0025187	0.0041566	0.0049778
087__9-HEPE	0	0	0	0	0	0	20.0563	7.47316	20.074	0	269.817	289.355	305.977	94.0599	231.063	68.732	21.4644	16.7799	0	11.1047	0.102687	0.0033461	0.116708	0.003651	0.298112	0.0034739
088__9-HEPE	0	0	0	0	0	0	0	0	0	0	38.0625	44.8125	30.4862	15.6601	31.1635	6.788	0	0	0	0	No info.	0.0027269	0.373901	0.0027269	0.373901	0.0022701
089__8,9-EpETE	0	0	0	0	0	0	0	0	0	0	11.5694	11.7029	11.4908	7.45703	7.08466	0	0	0	0	0	No info.	0.0007418	No info.	0.0007418	No info.	0.0007418
091__11-HEPE	0	0	0.901663	0	0	0	0	0	0	0	25.7697	30.8445	25.2444	12.7413	16.1927	4.25175	4.50799	5.90296	5.5444	2.47258	0.373901	0.0027011	0.0012063	0.0026601	0.0016515	0.0054675
093__12-HEPE	16.7451	11.7865	1.42385	9.90275	9.86009	5.6071	21.0946	20.8047	35.9172	16.345	2341.19	1796.59	2092.14	551.375	1308.31	422.055	195.027	98.3701	135.171	45.6986	0.104525	0.0071386	0.0606757	0.007294	0.0713226	0.0094051
097__15-HEPE	0	0	0	0	0	0	0	0	0	0	56.7872	68.1425	60.0046	24.1142	34.7824	17.5853	10.9553	11.2298	13.2142	3.83688	No info.	0.0041454	0.0069407	0.0041454	0.0069407	0.0088886
099__14,15-EpETE	0	0	0	0	0	0	0	0	0	0	14.3641	11.9027	16.7382	7.96426	5.76552	0	1.97868	0	4.65827	0	No info.	0.0048781	0.221161	0.0048781	0.221161	0.0019264
101__18-HEPE	1.30343	0.756173	0.384625	1.09498	1.1908	0	0	0	0	0	31.0872	38.9058	24.9002	16.8079	27.5316	11.0265	6.81276	6.64567	7.53335	3.32914	0.0048397	0.0017457	0.0070841	0.0015514	0.0045018	0.0006284
103__17,18-EpETE	8.28584	0	0	0	0	0	0	0	0	0	192.728	318.126	284.908	128.122	303.808	16.3987	27.7811	21.3992	36.4673	13.8681	0.373901	0.0026068	0.0012183	0.0025693	0.0047527	0.0035035
105__17,18-diHETE	141.774	82.0288	0	61.3229	36.7605	0	94.086	0	71.3744	0	716.243	1304.24	729.907	614.19	1322.88	361.133	407.804	397.975	661.14	201.291	0.347916	0.0044317	0.007646	0.0039725	0.0057082	0.0146946
107__20-HEPE	24.877	16.0582	0	0	0	25.6469	40.2148	28.9973	34.9316	0	106.232	141.112	157.053	93.0702	111.986	136.672	123.517	109.245	149.785	85.8575	0.0749467	2.14e-05	1.55e-05	0.0001116	8.65e-05	0.958167
152__RvD1	0	0	0.139917	0	0	0	0	0	0	0	0	0	0	0	0	0	0	0	0	0	0.373901	0.373901	0.373901	No info.	No info.	No info.
158__4-HDoHE	6.00642	0	6.51725	0	0	0	0	4.16933	0	0	0	0	0	0	0	23.8171	13.8569	12.9924	20.0858	11.9529	0.367049	0.178281	0.0009699	0.373901	0.0002079	0.0020002
161__7-HDoHE	4.26483	0	0	0	0	0	0	0	0	0	0	0	7.77356	5.1525	0	24.2483	14.351	17.2292	20.4806	10.2111	0.373901	0.375368	0.0002078	0.189311	0.0020312	0.0010078
162__8-HDoHE	12.4653	8.53981	8.73415	5.9608	13.4942	8.13168	8.62553	6.00362	11.8942	0	18.3433	19.159	14.9422	12.6921	12.8699	125.304	76.712	83.9638	145.706	54.1982	0.261852	0.0175775	0.0062437	0.0067282	0.0053977	0.0079822
165__10-HDoHE	6.7135	4.36331	2.18442	6.32819	6.30602	3.05704	6.53604	4.5612	8.44679	7.56635	17.8541	11.6338	16.0973	7.90557	11.5885	94.3389	45.1818	35.0618	47.3889	15.4539	0.530854	0.0040621	0.0310795	0.0088295	0.0330327	0.0562581
166__11-HDoHE	0	0	0	0	2.44094	0	2.36134	2.64019	3.72874	0	7.57755	7.38409	3.97952	3.03343	2.97781	29.7005	18.4677	19.2679	25.4648	12.9108	0.196919	0.0042849	0.001799	0.034501	0.0019332	0.0007988
170__13-HDoHE	4.53834	1.93187	0	0	1.81537	0	2.76183	2.64506	3.81066	0	5.60564	6.90843	8.72834	4.29359	5.11875	30.6888	20.2258	21.7043	27.5731	13.034	0.874309	0.0043582	0.0016577	0.0045491	0.0017932	0.0045927
171__14-HDoHE	64.7283	53.4077	0	38.3354	36.2181	27.0164	69.0622	79.2627	166.771	50.2669	320.974	175.885	277.914	85.1635	199.316	1516.85	728.007	413.899	663.733	163.396	0.1659	0.0115719	0.0444855	0.022892	0.0528823	0.0999535
175__16-HDoHE	4.61102	4.09186	0	0	4.42841	2.60833	6.3424	4.64302	7.89193	4.58905	7.95117	10.0973	8.30741	5.84832	14.7083	57.0452	46.8913	53.6771	64.4692	25.0155	0.101182	0.0062894	0.0019556	0.043463	0.0025377	0.0032487
176__17-HDoHE	0	0	0	0	0	0	0	0	0	0	15.6345	25.4298	24.1296	0	9.26693	107.299	68.3362	42.8152	47.4403	24.6315	No info.	0.0349032	0.0147039	0.0349032	0.0147039	0.0199155
178__16,17-EpDPE	0	0	0	0	0	0	0	0	0	0	8.09389	8.04348	0	0	0	24.3102	20.1491	13.5038	40.289	15.9493	No info.	0.177811	0.0085038	0.177811	0.0085038	0.0050749
180__20-HDoHE	7.07488	2.99011	0	0	0	3.73339	3.33244	4.759	6.24186	0	5.5016	13.0893	10.1297	6.37944	6.76406	59.4954	42.7852	46.5778	48.2297	23.9586	0.382927	0.0125634	0.001361	0.0264942	0.0018188	0.0026385
181__19,20-EpDPE	81.1795	62.2354	33.3519	32.1316	66.06	49.2684	76.8584	56.0018	100.115	98.3998	103.489	128.986	161.743	156.9	186.12	450.978	618.985	701.08	978.952	397.641	0.175756	0.0006644	0.004922	0.0037834	0.0056105	0.0089827
182__19,20-diHDoPE	105.963	78.0457	24.5022	43.3299	61.5002	44.6292	94.0007	47.4869	116.729	73.4233	87.5329	197.546	94.2422	99.9392	209.174	595.203	532.343	682.849	596.531	287.233	0.539866	0.038771	0.0016685	0.072942	0.001875	0.0005517
183__21-HDoHE	60.0851	45.67	13.8399	34.3964	31.1117	44.3775	65.2488	30.1523	78.548	69.8388	111.129	172.754	99.5825	67.3105	144.278	489.356	407.575	468.282	594.926	268.022	0.11747	0.0032309	0.0014168	0.0163456	0.0016721	0.0004249
184__22-HDoHE	7.21862	6.25228	0	0	9.58589	6.03795	7.18027	6.56404	10.3079	0	14.441	15.1401	11.1077	9.00225	11.9038	103.394	78.3604	91.8198	104.687	41.2148	0.600341	0.0091524	0.0021242	0.0141468	0.0023643	0.0034404
200__14,20-diHDoHE	32.6352	24.2467	13.3744	21.2214	20.7331	13.8974	20.9277	13.1343	11.6263	27.5804	11.1468	15.5704	12.8183	18.707	17.69	15.254	15.2557	18.6027	13.2647	12.6197	0.279949	0.0669452	0.0531385	0.517811	0.465409	0.918331
262__9-HODE	330.969	285.511	127.657	211.768	270.281	167.635	283.104	209.757	138.436	211.857	254.179	258.453	291.396	100.722	209.941	228.621	164.769	142.849	99.8172	48.0985	0.342788	0.656321	0.0476284	0.627781	0.132576	0.0920853
263__9,10-EpOME	33.1379	23.6	16.3727	28.4762	19.8962	19.8595	37.1994	21.912	19.9409	30.0279	46.2406	30.7219	38.2147	17.899	12.1644	39.9657	29.2179	20.8378	34.4395	15.801	0.750569	0.514339	0.499674	0.660824	0.694606	0.899973
264__9,10-diHOME	430.585	336.872	101.869	209.407	372.458	182.925	353.287	208.56	286.346	294.314	215.744	363.758	230.934	219.312	395.6	450.107	282.743	310.366	228.429	120.158	0.716972	0.943837	0.885959	0.698443	0.83605	0.922161
265__13-HODE	293.109	181.579	144.183	149.241	285.857	164.911	304.782	202.17	169.154	298.505	297.062	341.725	267.429	136.715	194.101	284.633	201.186	176.63	183.122	93.2981	0.713556	0.477772	0.621177	0.694406	0.381817	0.246495
266__12,13-EpOME	148.909	172.633	132.996	137.28	139.381	130.653	216.664	144.376	129.201	246.79	270.637	182.375	189.913	110.092	93.4408	189.018	178.545	132.71	176.629	75.3089	0.334583	0.514011	0.855106	0.918098	0.49432	0.634182
269__9-oxo-ODE	198.146	159.933	109.728	157.515	209.514	140.152	218.595	232.709	112.571	190.432	245.033	148.122	250.252	88.5621	132.124	125.212	141.547	97.3653	108.413	60.1569	0.690709	0.876895	0.0270324	0.881386	0.0269019	0.0942557
270__13-oxo-ODE	29.2845	14.1212	17.5068	15.0643	23.5517	15.8666	19.8859	20.4227	23.4824	34.1537	24.4273	31.08	18.0665	14.4776	14.9912	22.307	13.199	16.4618	21.2345	12.6931	0.517171	0.873188	0.456718	0.639436	0.167669	0.385409
272__9-HOTrE(n3)	23.7029	19.9559	8.97397	15.4086	23.0883	12.424	26.05	19.401	10.4938	16.6812	20.3506	21.3902	30.2577	5.91145	12.7434	18.5262	13.7395	9.56317	6.9992	2.82522	0.762045	0.985134	0.0746343	0.826901	0.12173	0.152884
275__13-HOTrE(n3)	10.4685	6.18452	5.11132	5.24573	9.91547	7.69553	12.133	8.06488	5.9257	14.9039	12.4648	11.9445	11.3342	4.0265	6.23943	10.323	8.52696	7.11545	5.94252	2.87453	0.274816	0.404859	0.80861	0.824512	0.214296	0.320217
281__9-oxo-OTrE(n3)	5.82106	4.20489	4.18087	5.00479	4.06351	4.03717	5.69198	5.02972	2.06294	0	8.05603	4.5722	6.86265	2.29288	3.49342	2.77611	4.85812	2.34062	0	0	0.27179	0.734632	0.0263015	0.288391	0.352814	0.0609782
303__PGE1	0	0	0	0	0	0	0	0	0	0	1.15497	0	0	0	0	0	0	0	0	0	No info.	0.373901	No info.	0.373901	No info.	0.373901
314__15-HETrE(n6)	4.21324	1.91766	1.34791	2.55759	2.31407	7.50706	10.1305	6.48433	7.20183	8.46593	1.85785	2.07381	2.13931	1.05942	0.979124	1.49024	0.765966	0.819658	1.81817	1.22731	0.0001214	0.156754	0.0438236	1.4e-05	0.0001971	0.249872
318__LTB3	0	0	0	0	0	0	0	0	0	0	0	0	0	0	6.82416	0	0	0	0	0	No info.	0.373901	No info.	0.373901	No info.	0.373901
319__5-HETrE(n9)	1.6126	1.4514	1.24088	0	0	0	0	0	0	0	0	0	0	0	0	0	0	0	0	0	0.0730979	0.0730979	0.0730979	No info.	No info.	No info.
355__16:0 Palmitic Acid	589304	291122	234069	257401	337135	375545	471586	473908	480694	558082	316219	415697	392583	361513	460484	467275	392674	388852	344172	307968	0.102022	0.509086	0.596419	0.0605881	0.0484226	0.807653
356__16:1 Palmitoleic Acid	122958	44353.3	37794	38668.1	70353.8	52072.7	70791.1	67596.6	64689.9	53037.3	46758	67999.4	67918.8	54496.9	76427.9	70647.6	60624.2	55945.7	48521.1	36906.4	0.946086	0.995215	0.641161	0.872901	0.330035	0.323215
357__18:0 Stearic Acid	80597.6	58466.1	48620.1	59278.6	51526.1	69344.9	83069.5	77674.4	91831.4	161116	47287.8	51750.8	61095.5	59223.9	69298.6	64139.6	63288.6	64009.7	57201.2	63248.2	0.0674589	0.779266	0.663375	0.0774357	0.10716	0.283277
358__18:1 Oleic Acid(n9)	140953	71903	61869.2	59511.8	83380.6	80434.5	100326	99555.3	97327.9	112006	64059.2	84129.2	77116.4	68919.7	83387.2	91892.6	76181.8	72122.7	66008.8	53122.8	0.388475	0.629316	0.49365	0.0082491	0.0124189	0.638044
359__18:2 Linoleic Acid	438387	261178	212681	205324	295787	335417	408307	396701	427860	439718	265160	321770	301065	255739	328950	376379	328569	290701	295255	224066	0.0323954	0.797722	0.689901	0.0018018	0.0127424	0.777967
360__18:3 a-Linolenic Acid(n3)	165740	76148.5	57114.8	56702.7	95922.9	125336	158835	154360	151533	135934	102390	123839	117116	97171.1	144742	147420	128431	115663	112304	72897.3	0.0508089	0.256707	0.32058	0.0281128	0.0622459	0.911475
361__18:3 g-Linolenic Acid(n6)	75793.6	34401.3	22957.8	29427.5	42478.9	69940.8	76943.9	85366.2	85995.5	71525.5	35797.6	40787.1	39807	32203.8	52093.3	41724.9	38744.5	33721.3	36810.3	22610.2	0.0056316	0.931481	0.540214	4.53e-05	1.6e-05	0.282859
362__18:4 Stearidonic Acid	1614.28	558.073	418.093	616.35	1239.11	1859.5	1880.2	2365.38	2455.57	1658.76	1523.79	1824.96	1883.41	1912.36	3458.58	1175.25	1227.99	1098.74	833.216	724.567	0.0031374	0.0172772	0.636497	0.843036	0.0005059	0.0288932
363__20:3 DGLA(n6)	15202.2	9802.24	7830.48	7429.28	10538.6	9196.75	13033.9	11122.1	13545.7	12314.3	6125.06	6447.43	7063.05	5790.48	7090.95	7248.34	6260.36	6043.85	5484.01	4256.72	0.321372	0.0569001	0.0192938	0.0001825	0.000186	0.278334
364__20:3 Mead Acid(n9)	2732.35	1365.74	1228.51	922.936	1593.07	575.213	547.341	721.136	732.633	686.939	322.107	396.478	421.416	339.918	330.83	421.241	260.974	240.697	262.1	217.154	0.041388	0.0176172	0.0138293	0.0001461	0.0001053	0.0824063
365__20:4 ETA(n3)	1487.72	728.903	584.351	543.751	735.52	973.469	1131.93	1035.06	1009.02	1419.12	2299.33	2235.87	2269.36	2014.76	2816.28	576.324	646.903	498.616	595.884	418.465	0.156192	0.0001171	0.196191	5.07e-05	0.0002368	7.29e-05
366__20:4 Arachidonic Acid(n6)	132203	86074.5	72812.4	70175.5	108905	574285	791621	760442	843319	879730	54695.6	66374.5	69342.2	61490	75845.3	48636.8	49574.4	43445.8	45733.6	35409.1	0.000137	0.07103	0.012208	0.0001776	0.0001618	0.0013669
367__20:5 EPA	20179.2	8829.7	9705.19	7825.56	13389.3	15123.1	16071.4	22281.6	19179.1	18147.4	350994	402192	398871	357468	496283	86849.4	98801.2	90529.6	81270.9	84135.8	0.0436635	0.0001061	0	0.0001198	0	0.0002392
368__22:4 Adrenic Acid	3189.12	3114.68	1664.13	2031.11	2572.4	14272.9	17936.2	17599.7	23915.7	23881.5	805.851	775.5	910.312	783.743	1023.67	724.603	697.021	650.678	682.437	519.673	0.0007206	0.0046571	0.0031377	0.0005974	0.0005739	0.0087994
369__22:5 DPA(n3)	7909.31	5645.16	3772.67	4065.33	6099.4	6577.95	7945.27	8255.61	9826.3	10748.9	59119.8	61320.1	65454.4	53342.5	74770.7	15665.8	15023.7	15077.5	16122	11662.4	0.0163693	5.38e-05	2.89e-05	7.01e-05	0.000503	0.0001089
370__22:5 Osbond Acid(n6)	1819.86	1641.9	966.809	1104.1	1487.74	6377.28	8664.23	9327.09	15044.3	11340.2	225.943	273.525	270.459	163.742	282.957	353.836	273.093	245.475	317.939	178.477	0.0036738	0.001757	0.0017896	0.0024438	0.0024695	0.440231
371__22:6 DHA	94706.3	55588.1	43309.9	43177.1	77428	79000.3	89512.6	101071	143017	120023	134958	138537	147775	136185	192515	460090	450073	436035	443458	360057	0.0208913	0.0003745	1e-07	0.0245742	3e-07	9e-07

## Sheet: Kidney pg_100mg
Sample Name	Control_kidney_No.1	Control_kidney_No.2	Control_kidney_No.3	Control_kidney_No.4	Control_kidney_No.5	AA_kidney_No.16	AA_kidney_No.17	AA_kidney_No.18	AA_kidney_No.19	AA_kidney_No.20	EPA_kidney_No.6	EPA_kidney_No.7	EPA_kidney_No.8	EPA_kidney_No.9	EPA_kidney_No.10	DHA_kidney_No.11	DHA_kidney_No.12	DHA_kidney_No.13	DHA_kidney_No.14	DHA_kidney_No.15	Q-values (Control vs ARA)	Q-values (Control vs EPA)	Q-values (Control vs DHA)	Q-values (ARA vs EPA)	Q-values (ARA vs DHA)	Q-values (EPA vs DHA)
001__PGE2	105.282	80.4223	112.552	32.9258	57.9756	537.086	402.471	238.136	123.602	156.058	62.5485	54.7238	20.2772	28.6489	11.0636	32.7263	33.2062	14.6838	40.0492	30.5185	0.0509448	0.0447047	0.0298202	0.0299091	0.02859	0.641908
002__PGD2	31.0906	29.3755	40.1636	0	15.8436	149.782	139.162	83.1201	22.028	25.645	0	0	0	9.14482	0	0	13.5178	0	0	7.03527	0.0875565	0.0352266	0.0339506	0.0382994	0.0414227	0.50586
007__15-deoxy-PGJ2	116.588	52.9641	36.082	15.6435	28.104	0	0	0	0	31.3088	144.838	171.426	189.983	123.351	84.0947	53.502	100.861	55.0785	49.5333	0	0.0490703	0.0067954	0.937934	0.0001156	0.0291394	0.005911
008__PGF2a	73.5628	127.156	143.33	47.1306	76.4363	267.754	250.799	157.69	59.1368	91.7774	0	0	0	27.0661	0	0	0	0	37.7256	0	0.150887	0.006197	0.0022487	0.0176809	0.0179715	0.82418
009__6-keto-PGF1a	229.442	263.926	232.251	96.6257	111.393	1148.64	997.1	427.288	222.861	199.031	82.7828	0	0	68.3999	0	118.361	0	0	83.0337	133.342	0.10674	0.0039493	0.0278872	0.045625	0.0548238	0.312855
011__TXB2	0	104.507	88.0061	0	78.3259	128.228	113.327	108.805	0	0	0	0	0	0	0	0	0	0	0	0	0.674887	0.0738145	0.0738145	0.0716572	0.0716572	No info.
012__12-HHTrE	66.1626	143.12	143.933	34.0235	94.7274	220.142	166.419	130.938	49.4482	75.448	33.94	26.0243	17.3771	18.8845	15.0926	24.9329	16.5682	0	23.1872	8.99276	0.417343	0.0251468	0.0176129	0.0254417	0.0200089	0.228383
028__5-HETE	278.393	236.563	144.482	176.496	270.845	937.555	760.772	1146.38	918.32	1016.63	146.581	160.59	135.258	138.687	88.7009	151.448	255.573	150.755	228.3	117.725	5e-06	0.0166699	0.305026	0.0001403	3.3e-06	0.142232
029__5,6-EET	908.673	729.435	333.375	387.203	372.673	1251.69	913.264	683.548	877.003	779.77	205.418	324.134	176.006	298.133	574.099	217.459	291.859	206.621	363.758	188.621	0.0458358	0.125816	0.0623387	0.0011804	0.0002175	0.447625
030__5,6-DHT	30.1859	33.0237	0	10.7252	0	153.57	197.149	183.043	204.224	189.275	0	14.0081	0	0	0	0	17.527	0	0	0	4e-07	0.157373	0.194469	8.2e-06	1e-07	0.879262
031__8-HETE	213.288	169.689	163.612	143.04	155.671	323.481	253.44	353.592	322.821	296.404	129.082	148.232	136.195	131.191	62.4098	174.254	225.068	145.977	168.384	132.557	0.0001316	0.0384754	0.992664	3.21e-05	0.0002912	0.0606148
032__9-HETE	225.173	230.472	0	135.628	115.727	369.257	345.163	449.317	248.416	361.799	100.247	130.746	106.648	77.8979	0	0	0	0	0	29.9261	0.0038193	0.25735	0.0318522	0.0001197	0.0003033	0.0239746
033__8,9-EET	5796.12	6550.03	3300.17	3737.17	3122.81	13022.4	9642.29	6520.93	9399.32	9695.68	1869.2	2280.67	1312.26	2560.88	2301.55	2043.32	2992.74	1756.42	3398.11	1514.5	0.0032601	0.0224811	0.025556	0.0014049	0.0001537	0.533923
034__8,9-DHT	36.4393	45.2642	0	42.5131	24.1312	94.65	110.779	82.5514	84.503	84.871	0	0	0	0	0	0	36.4281	0	0	0	0.0002307	0.0229321	0.0766	6.45e-05	1.38e-05	0.373901
035__11-HETE	139.758	165.309	117.412	76.4917	107.66	284.006	212.886	285.476	188.964	206.951	84.7134	63.971	40.1839	48.2745	32.364	63.2424	69.1156	39.2888	82.6746	35.6445	0.0019647	0.0050678	0.0067086	4e-05	4.51e-05	0.759771
036__12-HETE	232.13	863.673	271.712	180.027	216.288	712.415	660.903	652.883	433.431	500.377	184.357	193.809	68.1338	155.961	92.9226	162.634	156.301	98.4088	109.932	81.4576	0.123822	0.173047	0.146998	5.68e-05	0.0004952	0.576764
037__11,12-EET	10029.6	11509.6	5990.52	7150.47	5397.11	21698.5	15082.7	11272.1	15723.9	13078.8	3352.21	3676.13	2178.09	3793.14	3860.33	3429.33	5383.11	4092.14	5388.17	2861.92	0.0085387	0.0150911	0.0187508	0.0020823	0.0022409	0.188404
038__11,12-DHT	66.4	41.2503	23.1541	35.6389	18.8244	97.8821	130.857	61.5946	86.1537	61.9035	14.2083	20.3912	21.2674	16.5655	19.9527	28.1822	32.2362	16.5489	25.217	25.3304	0.0109445	0.0906458	0.247903	0.005557	0.0074976	0.0417207
039__15-HETE	231.949	314.811	106.9	166.094	199.194	474.291	506.546	702.673	329.402	382.799	120.671	102.82	75.1331	97.2381	61.7552	98.915	138.6	77.4692	95.3324	71.3952	0.0054247	0.0288037	0.0187204	0.0033778	0.003437	0.766894
040__14,15-EET	21490.2	23713.9	13974.6	15033.5	10368.2	41254.2	29495.3	18940.6	30594.4	27685.2	7039.45	7892.6	4845.58	8597.38	8510.84	7574.65	11585.2	8190.47	11768.4	5967.13	0.0192115	0.0158599	0.019909	0.0028424	0.0030577	0.255096
041__14,15-DHT	182.126	191.448	79.6298	110.556	84.7087	430.961	464.362	214.522	355.144	274.251	68.325	85.4035	61.9376	61.8312	62.4621	72.4444	103.691	86.024	75.3639	104.224	0.003196	0.0603923	0.161958	0.0037573	0.0047487	0.0367609
042__16-HETE	50.76	44.7945	0	32.296	24.9588	67.5816	40.267	89.8001	35.1574	85.7025	22.1599	14.6852	16.4636	0	0	13.9348	24.5815	0	0	0	0.0498377	0.0810384	0.0553306	0.0023978	0.001905	0.672749
044__17-HETE	33.6928	0	0	0	0	27.6059	16.1743	32.0904	21.5793	0	0	0	0	0	0	0	0	0	0	0	0.182724	0.373901	0.373901	0.0248757	0.0248757	No info.
046__18-HETE	46.3663	42.3059	29.4079	29.94	0	51.9613	58.163	35.7898	59.5227	68.2377	0	42.3286	22.7696	21.2595	54.3869	24.225	24.6358	29.9011	27.179	16.1067	0.0327842	0.909507	0.567287	0.0395096	0.0008624	0.716276
048__19-HETE	66.3089	71.4114	0	0	0	108.491	139.163	0	164.985	114.223	0	0	0	0	0	0	0	0	0	0	0.0453321	0.178198	0.178198	0.0201436	0.0201436	No info.
050__20-HETE	0	0	0	0	0	0	0	0	0	0	160.318	0	0	0	0	0	0	0	0	0	No info.	0.373901	No info.	0.373901	No info.	0.373901
051__5-oxo-ETE	389.62	324.708	230.346	335.396	382.329	693.101	637.811	990.623	616.313	659.011	155.592	177.426	90.497	150.203	75.7301	90.7585	215.604	140.832	192.993	82.9439	0.0008395	0.0003871	0.0013172	0.0006106	5.36e-05	0.667986
054__15-oxo-ETE	386.662	415.467	186.424	286.707	302.495	632.642	677.17	790.899	488.907	494.155	182.048	168.315	133.064	144.508	97.9548	120.913	259.108	157.2	226.367	108.013	0.0026303	0.0041669	0.0224865	0.0007907	0.0001289	0.402229
083__5-HEPE	67.0456	24.0557	37.7473	36.6945	0	51.968	27.7793	0	0	58.5768	616.164	581.286	523.538	502.258	680.851	144.23	231.053	171.166	191.407	118.599	0.749842	2e-07	0.0002519	2e-07	0.0002457	4.4e-06
086__8-HEPE	37.294	0	0	0	0	0	0	0	0	0	154.441	120.199	96.3313	107.758	107.043	74.4253	72.325	37.4774	60.3866	24.7923	0.373901	2.26e-05	0.0054654	0.0003107	0.0053298	0.0019862
088__9-HEPE	0	0	0	0	0	0	0	0	0	0	155.892	121.061	106.161	111.975	148.719	142.186	80.7442	104.846	88.265	0	No info.	0.0002069	0.0235026	0.0002069	0.0235026	0.110478
089__8,9-EpETE	299.375	205.406	135.352	133.232	104.334	96.5843	45.0392	0	0	107.121	3276.21	4961.76	2068.59	3837.8	5218.14	1578.11	2332.77	1785.05	1900.48	986.48	0.0170681	0.00295	0.0019146	0.0026325	0.001532	0.0080516
091__11-HEPE	33.3111	0	0	0	0	0	0	0	0	0	139.784	192.394	119.314	114.808	110.514	52.0167	67.5501	38.5293	69.9901	31.2653	0.373901	5.28e-05	0.0021402	0.0008602	0.0024945	0.0011557
093__12-HEPE	31.7815	42.9314	17.5403	32.5001	13.7831	70.7324	110.273	28.1731	0	0	401.036	357.529	187.068	226.478	305.468	149.738	102.999	77.7042	123.081	69.0112	0.553909	0.0023039	0.0012141	0.000501	0.0428189	0.0019928
095__11,12-EpETE	315.15	219.939	150.404	166.642	108.2	106.47	53.5005	54.5342	81.8818	67.0359	3642.78	4502.3	2834.38	3731.49	6236.97	1540.46	2257.88	1664.56	1794.37	975.868	0.0260038	0.0022165	0.0018418	0.0020235	0.0015831	0.0031877
097__15-HEPE	0	0	0	0	0	36.8304	0	0	0	0	184.754	210.28	117.706	137.591	168.27	96.385	67.0007	66.3954	117.578	44.0581	0.373901	0.0005763	0.0036904	2.45e-05	0.0013855	0.0035031
099__14,15-EpETE	677.466	502.336	375.735	325.661	280.623	323.089	142.316	122.349	180.942	179.777	9110.74	11718.6	6525.86	10209.9	16580.9	4223.28	6339.55	4179.04	4930.93	2810.79	0.0160329	0.0033545	0.0019338	0.0031009	0.0016564	0.0071149
101__18-HEPE	8.70227	9.70637	0	0	0	10.0168	7.02661	0	0	0	100.899	115.529	133.567	106.113	136.073	44.958	70.4111	46.6392	78.9728	27.2323	0.932258	2.84e-05	0.0047961	3.12e-05	0.0047869	0.0005584
103__17,18-EpETE	900.24	784.99	504.847	496.429	350.757	367.958	220.775	184.829	209.74	286.681	11980.7	16018.2	9259.46	14907.1	18659.9	4963.9	7574.89	5304.72	6335.7	3342.59	0.0106791	0.0011074	0.0020363	0.0010273	0.0017279	0.0012252
105__17,18-diHETE	0	0	0	0	0	0	0	0	0	0	1016.13	882.872	926.586	791.541	1865.75	455.605	551.777	490.252	508.882	555.574	No info.	0.0049782	1.1e-05	0.0049782	1.1e-05	0.0401342
107__20-HEPE	330.566	177.807	130.713	182.748	296.922	179.532	210.788	250.993	0	0	233.748	335.232	324.89	280.231	416.288	493.127	514.762	549.976	561.175	436.272	0.184833	0.0896324	0.0001896	0.0151043	0.0001701	0.0009143
158__4-HDoHE	543.011	552.704	307.017	410.289	426.545	629.643	482.842	725.888	454.422	528.265	740.648	928.677	522.516	671.972	536.63	1216.64	1802.94	1404.31	1666.66	1034.97	0.124978	0.0289297	0.0001701	0.233021	0.0004267	0.0015943
161__7-HDoHE	137.514	72.1329	0	71.1044	57.3627	66.3671	65.1245	111.711	73.191	0	75.3234	92.7172	63.5935	48.7225	61.1617	193.363	236.9	210.046	205.487	109.532	0.88195	0.977232	0.0038748	0.802624	0.0018772	0.0006638
162__8-HDoHE	328.476	336.885	183.634	230.555	266.078	261.984	342.187	455.486	269.576	218.877	277.367	503.419	251.614	372.204	344.357	998.97	1169.91	976.703	1156.47	788.956	0.447308	0.16569	8.9e-06	0.526081	2.28e-05	3.95e-05
165__10-HDoHE	70.0768	61.6844	34.5474	25.8872	41.9486	41.9154	35.1611	81.5061	51.6486	51.6125	60.5917	56.8176	58.51	56.3217	34.5458	138.378	190.136	150.516	193.616	94.631	0.641958	0.51396	0.0007096	0.917461	0.0009496	0.0042037
166__11-HDoHE	106.73	69.9053	33.5392	63.0047	49.6213	75.0119	55.5631	136.547	65.7778	106.366	92.8185	95.1711	80.5166	86.0549	103.493	197.53	363.078	232.671	314.478	115.098	0.260574	0.0913376	0.0123792	0.817348	0.0093412	0.0244136
170__13-HDoHE	90.3183	113.304	41.9844	61.4689	69.3573	87.0132	82.538	119.12	56.0954	95.7283	108.782	80.8651	76.5847	78.2494	75.3189	199.021	323.554	215.225	268.682	124.333	0.444815	0.546422	0.0029027	0.738364	0.0122564	0.0122242
171__14-HDoHE	69.068	136.227	65.2325	91.1349	69.956	284.194	77.7374	133.308	104.579	99.9878	169.739	112.099	96.1595	147.747	120.343	274.917	429.105	295.544	428.194	242.125	0.210807	0.0507054	0.0003487	0.791911	0.0072382	0.0011784
175__16-HDoHE	141.741	160.981	75.2009	111.684	113.832	174.124	102.431	201.351	113.598	133.004	145.125	187.253	136.695	143.681	150.715	361.722	537.801	356.21	511.192	240.537	0.336746	0.0983553	0.0054934	0.716204	0.002199	0.009778
176__17-HDoHE	232.359	318.779	132.139	180.038	0	309.803	197.222	424.232	187.027	221.58	308.363	326.212	281.447	284.547	285.82	588.125	952.676	767.097	856.91	342.492	0.206842	0.0782118	0.0023063	0.552173	0.0059632	0.0198308
178__16,17-EpDPE	9129.86	9613.35	5376.53	6740.37	5304.03	11238.4	7460.79	7251.27	9884.09	8083.4	9725.37	10497.8	7161.68	12488.3	14912.4	24947.3	36910.3	29749.5	35605.1	19641.1	0.230097	0.0476456	0.0016316	0.189483	0.0024342	0.0007558
180__20-HDoHE	204.561	214.989	141.21	189.036	171.121	271.505	133.426	421.669	160.354	248.362	263.17	205.295	250.655	190.428	242.929	649.712	794.79	724.736	900.864	294.169	0.289185	0.0413053	0.0086716	0.766674	0.0060513	0.0122586
181__19,20-EpDPE	13589.3	16337.9	8434.03	12616.1	9428.68	19920.4	12605.8	12623.7	16568.5	13876.1	15634.4	19974.6	11918.6	20039.5	24155.2	44348.6	63064.5	49237.5	59919.1	33079.3	0.167894	0.0389127	0.0015531	0.236691	0.0022299	0.0006207
182__19,20-diHDoPE	332.722	304.072	101.595	218.851	196.782	333.838	354.288	316.118	255.938	275.642	250.056	352.851	317.833	299.706	382.625	948.414	959.065	819.734	774.723	1249.03	0.12767	0.0920374	5.33e-05	0.656276	0.0011129	0.0010541
183__21-HDoHE	186.706	138.466	141.456	97.1088	98.2437	148.977	131.155	137.203	104.414	148.835	193.83	178.827	104.252	194.288	310.029	579.178	542.171	379.547	603.922	300.747	0.928039	0.121647	0.0031689	0.133413	0.0040256	0.0030899
184__22-HDoHE	0	0	0	0	0	0	0	0	0	0	0	0	0	0	0	0	85.7729	63.675	91.5864	56.257	No info.	No info.	0.0216444	No info.	0.0216444	0.0216444
262__9-HODE	212.737	275.539	194.435	184.626	169.071	179.841	179.061	159.778	121.013	133.587	147.05	174.465	109.96	106.181	150.665	125.959	195.902	146.263	155.709	80.5182	0.0435389	0.0150461	0.0362117	0.362845	0.554194	0.892236
263__9,10-EpOME	11856.4	6979.52	4106.98	4940.04	3744.8	6442.99	5072.48	3774.86	4355.41	4030.77	4611.84	6495.14	3307.06	5951.58	6690.54	7109.95	10191.5	7912.32	8865.91	4494.02	0.358433	0.588661	0.455492	0.422062	0.0236079	0.0799364
264__9,10-diHOME	208.47	212.068	108.164	125.471	117.815	125.682	206.165	127.933	115.415	110.107	110.591	136.258	118.926	100.57	159.188	226.679	155.526	157.847	111.076	151.186	0.565645	0.27857	0.842673	0.57398	0.387651	0.135587
265__13-HODE	445.781	385.472	368.363	352.237	312.372	390.908	349.79	377.697	379.995	394.055	401.495	348.177	304.491	336.78	368.333	352.617	526.101	392.679	564.22	244.817	0.81424	0.462542	0.507039	0.176122	0.556274	0.340707
266__12,13-EpOME	16318.6	9168.12	7401.79	6806.92	6127.14	9451.45	7178.47	4605.23	6565.26	5746.72	7068.22	9854.37	4551.21	8318.01	9621.2	11248.3	14570.2	11215	11010.6	6442.99	0.260414	0.55793	0.466266	0.380635	0.0254004	0.0996176
272__9-HOTrE(n3)	20.3857	20.498	12.7019	18.6687	18.0763	12.4873	14.1142	11.6772	13.4967	9.34751	11.0227	19.854	11.6318	12.866	18.5896	11.716	11.7334	9.4626	13.6319	6.63906	0.0075508	0.197322	0.0039712	0.239774	0.307893	0.0953271
275__13-HOTrE(n3)	0	0	24.6625	12.2137	24.2059	24.9907	10.5297	21.4	0	19.7915	22.1287	8.37852	9.85361	20.0975	20.0289	10.0594	19.6156	18.0133	11.0924	6.76119	0.670943	0.547427	0.885278	0.891448	0.675254	0.452405
281__9-oxo-OTrE(n3)	0	0	0	0	0	0	0	8.76094	0	0	0	0	0	0	0	0	0	0	0	0	0.373901	No info.	No info.	0.373901	0.373901	No info.
314__15-HETrE(n6)	64.0969	46.9881	17.2813	23.2252	18.4872	32.1548	21.7996	31.4117	10.1542	16.8361	16.7047	16.9802	16.0271	22.9365	12.4411	14.1937	28.1176	13.6256	24.0063	8.60536	0.289155	0.1404	0.139071	0.265335	0.416418	0.866359
319__5-HETrE(n9)	0	0	0	0	0	0	0	0	0	0.720608	0	0	0	0	0	0	0	0	0	0	0.373901	No info.	No info.	0.373901	0.373901	No info.
355__16:0 Palmitic Acid	942337	807324	612280	707258	641082	1.00987e+06	948218	781821	782087	1.17572e+06	666510	716251	684958	632221	727417	776782	774760	618966	956809	891855	0.0728989	0.41087	0.48065	0.0249591	0.187537	0.110696
356__16:1 Palmitoleic Acid	29879.4	8311.47	7872.58	9137.93	9008.14	9183.76	11762.7	6630.23	4182.17	7020.68	5367.06	7772.37	6611.78	6525.81	7719.63	7948.67	7965.66	5636.4	6292.94	6446.8	0.308082	0.230199	0.234066	0.499721	0.528118	0.92978
357__18:0 Stearic Acid	365283	363855	266229	277504	290925	366948	345777	344226	352290	475894	269373	275511	259533	243332	265750	265601	289113	232764	341869	329055	0.0874169	0.0794964	0.494287	0.0090442	0.0288776	0.227714
358__18:1 Oleic Acid(n9)	195532	121439	79498.6	94311.8	91553.6	115239	123146	88542.7	78641.5	115769	76333.4	92529.5	72231.2	69501.5	73497.2	85124	91906.9	64951.9	86882.4	88575.9	0.60494	0.131326	0.192509	0.021238	0.0694751	0.318778
359__18:2 Linoleic Acid	521631	358442	224737	272904	266411	353313	385956	250413	261837	341737	251671	336896	245181	249316	277022	351108	417874	294100	387494	398779	0.86779	0.336685	0.493475	0.178838	0.17503	0.0078088
360__18:3 a-Linolenic Acid(n3)	64516.1	27954.8	19330.4	21718.3	19879.7	38644.5	48922.6	22035.6	16998.2	31811.6	24231.3	31595.5	23542.7	21620.5	26380.4	33892.6	38419.5	21120.9	30141	29525.6	0.925037	0.582299	0.994882	0.348793	0.872132	0.160725
361__18:3 g-Linolenic Acid(n6)	162154	68870.9	52205.4	57555.7	49991.3	97829.2	115845	59292.3	49611.7	80609.6	65180.1	83510.8	52285.2	59920.7	66658.9	83142.2	96460.9	56514.7	77277.5	68948.1	0.921736	0.591027	0.942726	0.284948	0.771562	0.231335
362__18:4 Stearidonic Acid	924.117	542.567	364.486	523.152	207.707	760.098	934.168	773.047	517.699	416.136	1353.86	2224.13	1207.73	1114.41	2367.73	1096.38	2374.7	2020.16	1826.25	1433.33	0.301068	0.0044557	0.0012101	0.0086751	0.0022279	0.787928
363__20:3 DGLA(n6)	73493.3	74174.6	28413.6	43116.6	27916.1	33261.5	34469.9	21482	23226.5	38148	21858.2	35332.7	26958.5	22923.7	28624.5	31124.5	37029.6	22817.9	38935.1	35892.2	0.137552	0.0968579	0.194721	0.484656	0.506215	0.147491
364__20:3 Mead Acid(n9)	6551.39	5007.01	2455.69	2670.62	2295.02	739.212	613.669	398.086	356.166	719.803	895.968	1010.56	922.814	825.035	659.595	951.911	1034.7	732.98	1167.35	1248.48	0.0185952	0.0256243	0.0304449	0.0172406	0.0049439	0.164179
365__20:4 ETA(n3)	1728.76	1424.47	1022.49	1521.17	1161.5	1441.18	1918.37	1372.27	1391.72	1906.57	3912.34	5186.05	3863.29	3003.89	4993.26	2001.5	3186.78	3018.9	3724.8	2719.76	0.224693	0.0013345	0.001031	0.0019542	0.0027392	0.0334262
366__20:4 Arachidonic Acid(n6)	1.33561e+06	1.53097e+06	774632	1.12261e+06	967952	2.58567e+06	2.5929e+06	2.13909e+06	2.09409e+06	2.8502e+06	595110	599805	578570	537254	501395	587181	680338	461475	777973	772968	0.0001646	0.0112028	0.009935	0.0001707	3.1e-06	0.19889
367__20:5 EPA	54241	44536.9	27159.8	31907.9	28403	25201.3	18427.2	15088.8	16067	24308.7	632794	784572	701463	570546	821693	298404	325103	226289	306861	337157	0.0149708	0.0001211	8.45e-05	0.0001225	0.0001186	4.32e-05
368__22:4 Adrenic Acid	9019.37	12235.8	5180.44	8986.21	5706.76	39562.9	42832.8	31511.1	34724.1	46631.2	1599.76	1922.18	1457.55	1497.08	1751.52	1204.93	1602.72	1028.8	1819.22	1652.94	7e-06	0.0067308	0.0059017	0.0001595	0.0001533	0.313565
369__22:5 DPA(n3)	27145.5	30251.5	15833	23014.9	17184.6	28564.7	28625.6	23308.4	19959.6	31696.5	131317	159234	147920	124146	148401	42144.1	51265.7	37167.3	54451.6	54793	0.314144	1e-07	0.0004981	1e-07	0.000791	1.2e-06
370__22:5 Osbond Acid(n6)	4811.78	8649.86	3043.71	5010.73	3199.82	21080.7	23919.5	19366.4	17523.6	26009	368.579	454.928	249.39	432.929	299.171	418.085	446.219	260.28	470.692	427.768	1.73e-05	0.010483	0.0108394	0.0001548	0.0001562	0.441397
371__22:6 DHA	461244	522635	270415	371054	337316	594145	567498	577908	567356	690530	495154	582192	531917	484302	604846	1.1286e+06	1.16878e+06	894929	1.29036e+06	1.40473e+06	0.0034285	0.0196693	3.91e-05	0.109034	0.0017576	0.0011453

## Sheet: Spleen pg_100mg
Sample Name	Control_spleen_No.1	Control_spleen_No.2	Control_spleen_No.3	Control_spleen_No.4	Control_spleen_No.5	AA_spleen_No.16	AA_spleen_No.17	AA_spleen_No.18	AA_spleen_No.19	AA_spleen_No.20	EPA_spleen_No.6	EPA_spleen_No.7	EPA_spleen_No.8	EPA_spleen_No.9	EPA_spleen_No.10	DHA_spleen_No.11	DHA_spleen_No.12	DHA_spleen_No.13	DHA_spleen_No.14	DHA_spleen_No.15	Q-values (Control vs ARA)	Q-values (Control vs EPA)	Q-values (Control vs DHA)	Q-values (ARA vs EPA)	Q-values (ARA vs DHA)	Q-values (EPA vs DHA)
001__PGE2	3287.43	1950.87	308.302	2428.95	2507.93	5661.74	5154.15	14194	4860.41	9048.22	1137.23	442.132	206.886	369.293	440.94	300.348	1547.86	1286.01	364.569	277.454	0.0300022	0.0163833	0.0453428	0.0145167	0.0157073	0.478187
002__PGD2	35606.5	33044	9760.6	39614.5	29261.9	76937.8	90184.9	128281	67940.4	121871	14371	8222.17	3512.43	7007	5984.51	3789.73	21229.7	25266.7	5590.01	3584.78	0.0008646	0.0043808	0.0365755	0.0015413	0.0001697	0.441572
004__15-keto-PGE2	575.624	612.454	112.898	543.554	915.108	1656.81	652.051	1574.87	1040.11	4086.26	414.257	202.32	150.328	237.974	202.934	176.377	515.915	726.355	297.586	166.818	0.105277	0.0519548	0.325799	0.0597143	0.0754823	0.281295
007__15-deoxy-PGJ2	104.384	98.5282	53.8654	118.207	118.902	227.805	279.804	477.598	221.247	417.464	0	0	0	0	0	0	0	0	0	0	0.0107472	0.0011494	0.0011494	0.0033507	0.0033507	No info.
008__PGF2a	768.466	614.888	165.913	671.94	581.535	1463.26	1281.43	2586.43	1132.65	2315.17	290.909	161.999	91.8519	128.454	140.668	70.712	393.508	448.859	93.7199	0	0.0048014	0.0065201	0.0316914	0.005184	0.004337	0.702923
009__6-keto-PGF1a	31643.5	24197	8085.98	22321.7	25502.5	52857.7	55585.1	70182.3	38615.6	80480.5	13730	4996.74	3533.08	5682.23	5200.65	4772	15879.3	11271.4	4259.94	6831.42	0.0019448	0.0063903	0.0152483	0.0013309	0.0013631	0.507964
011__TXB2	14547.5	14729.4	2799.09	24357.2	14946	34238.8	36673	88590.3	38967.9	79103.6	9522.24	3383.64	1296.74	3182.26	2811.81	914.387	11504.4	10483.5	2054.05	1310.7	0.0216473	0.0245255	0.0616274	0.0111998	0.0114543	0.6706
012__12-HHTrE	11311.2	7259.34	2571.27	7806.82	4674.64	11117.5	14980.9	20308.6	13773	19355.3	3655.51	883.29	567.172	1423.24	1108.72	473.032	2659.55	2341.39	896.995	377.365	0.0037604	0.0110721	0.0087036	0.000615	0.0006648	0.813679
028__5-HETE	571.347	917.942	366.673	819.185	2762.91	3730	4832.18	5748.58	5071.18	10779.7	2908.95	313.368	359.138	756.448	678.578	471.216	793.018	2016.66	1105.99	587.025	0.0052837	0.899595	0.860487	0.0052134	0.0133952	0.9882
029__5,6-EET	576.041	753.228	279.279	515.266	1114.37	1976.76	1980.89	2096.13	1889.65	2846.45	668.105	334.32	297.064	451.461	338.283	288.107	303.41	607.601	412.627	346.862	0.0001451	0.175879	0.12816	1.5e-05	1.18e-05	0.777139
030__5,6-DHT	0	0	0	0	0	290.962	243.606	461.661	466.534	441.482	29.7692	0	0	0	0	0	0	0	0	0	0.0012764	0.373901	No info.	0.0012249	0.0012764	0.373901
031__8-HETE	221.24	478.18	0	445.42	715.922	1634.62	2294.06	2345.08	1867.16	3007.1	477.768	261.33	360.635	389.485	338.114	222.767	265.983	649.151	499.022	190.268	0.0001113	0.960086	0.965596	0.001194	7.56e-05	0.999772
032__9-HETE	344.883	557.034	372.37	478.001	1104.52	1805.24	2661.9	2769.39	2729.4	3852.3	0	133.443	165.875	428.467	0	0	404.395	784.495	431.423	244.491	0.000259	0.0281753	0.324201	0.0009054	0.0001326	0.168961
033__8,9-EET	3881.98	5161.05	2573.6	3985.36	5182.37	15230.8	22101.3	14011.5	15651.8	22382.6	4632.33	2002	0	3721.44	2458.68	1234.11	2708.09	5231.47	3522.02	2877.85	0.0010685	0.123874	0.233465	5.35e-05	5.73e-05	0.604224
034__8,9-DHT	67.3109	0	31.696	107.419	133.235	204.822	292.922	235.495	397.139	451.79	50.8351	0	0	0	0	0	0	0	0	0	0.0015614	0.05922	0.0486904	0.0023129	0.0025588	0.373901
035__11-HETE	3157.7	2786.59	973.674	2748.2	2841.3	6252.17	8174.26	8118.81	5259.69	8399.97	1817.47	754.132	511.885	895.981	777.552	527.313	1526.69	1849.32	895.401	561.487	0.0002054	0.0086974	0.0160624	1.32e-05	1.78e-05	0.737416
036__12-HETE	6573.37	4005.53	1087.79	5055.64	8158.18	12919.9	8037.93	66027.5	5784.71	26873.4	8253.48	2699.82	3165.69	3244.51	2576.51	1700.67	4251.13	3974.86	2132.83	2572.13	0.164498	0.556355	0.153802	0.148189	0.132581	0.397265
037__11,12-EET	5987.94	8136.7	3799.64	4998.36	8151.18	23511.5	28216	20340.4	20991.5	29637.3	7061.01	4168.86	2385.94	4333.64	4137.49	4058.5	4162.88	7435.68	5173.35	4195.5	2.08e-05	0.15407	0.292077	8.9e-06	9.6e-06	0.567714
038__11,12-DHT	34.0182	48.5016	30.2792	70.7601	80.9195	157.127	180.857	204.35	268.847	267.908	44.5827	23.7565	25.4112	56.7679	33.4005	15.4231	33.4343	54.8671	33.4814	42.6546	0.0001756	0.207611	0.192497	0.0009054	0.0008583	0.930082
039__15-HETE	2418.26	2096.43	854.344	2445.22	3245.22	6449.61	8305.67	9248.27	6616.2	10278	1587.51	507.438	540.278	1058.82	661.595	520.625	1287.22	1527.03	1144.51	635.373	9.92e-05	0.0157287	0.0254004	0.0003387	0.0003934	0.603263
040__14,15-EET	12549.1	12594.1	8116.02	10082.2	15286.2	43079.2	47071.5	37249.2	38223.6	56080.1	12702.6	7518.36	4238.88	8577.13	7621.1	7636.59	8041.61	12791.7	10311.4	8292.98	1.9e-05	0.0846547	0.175576	9.7e-06	0.0002849	0.462837
041__14,15-DHT	107.566	122.276	77.8039	164.218	158.765	566.667	452.346	591.02	909.338	671.106	113.445	77.9235	71.8527	131.723	82.2979	62.1188	101.181	185.536	96.705	84.3278	0.0020553	0.160975	0.468743	0.0018205	0.0015187	0.672423
042__16-HETE	39.5254	57.8674	0	79.1707	166.763	237.611	510.416	451.437	499.104	634.323	0	0	0	64.2955	33.093	0	48.6827	126.138	0	54.2412	0.0004812	0.146805	0.544964	0.0018713	0.0002828	0.349705
044__17-HETE	0	0	0	0	0	69.1829	0	0	0	0	0	0	0	0	0	0	0	0	0	0	0.373901	No info.	No info.	0.373901	0.373901	No info.
046__18-HETE	78.3328	73.9679	43.986	56.566	119.364	253.294	262.755	227.715	172.914	301.761	78.7229	56.6744	39.4668	65.7339	29.8109	0	39.353	53.2144	50.0304	0	0.0001372	0.226603	0.0301683	3.59e-05	2.15e-05	0.121973
051__5-oxo-ETE	350.739	704.877	254.793	818.951	2281.11	3140.75	4581.14	4740.17	7698.32	8623.17	677.94	319.383	322.104	749.79	553.572	275.892	594.394	1323.33	1147.26	557.147	0.0021169	0.390099	0.810951	0.006915	0.0075802	0.270031
054__15-oxo-ETE	392.361	551.292	196.353	550.551	925.645	1960.61	1622.23	1592.55	3226.92	4432.81	513.984	248.577	234.652	575.502	332.92	186.228	445.602	783.931	801.061	286.595	0.0193755	0.335217	0.900064	0.0162675	0.018517	0.430617
065__PGE3	0	0	0	0	0	0	0	0	0	0	805.074	361.997	370.209	480.916	536.321	76.9587	314.294	290.822	74.1494	118.5	No info.	0.0031773	0.0295912	0.0031773	0.0295912	0.0082563
066__PGD3	576.103	0	0	1047.33	0	0	401.85	0	0	0	13951.9	9121.98	5434.17	9225.91	6659.91	1200.17	5401.18	5225.86	983.206	1415.95	0.313248	0.0038816	0.0659851	0.0037801	0.0518417	0.0094129
070__6-keto-PGF1a-17delta	0	0	0	0	0	0	0	0	0	0	2172.18	723.004	454.555	850.367	672.712	0	578.346	0	0	0	No info.	0.033429	0.373901	0.033429	0.373901	0.0304406
071__TXB3	92.3813	100.221	0	160.841	0	0	0	137.615	0	0	3728.72	1218.82	636.17	1206.24	883.67	87.1388	852.973	667.361	84.893	0	0.329802	0.0587807	0.202969	0.0542458	0.151297	0.0992975
083__5-HEPE	32.9755	54.9168	0	65.3736	122.574	77.0538	0	0	53.7731	147.222	11456.8	1226.79	1188.36	2471.87	2683.38	416.936	427.167	1167.67	763.349	421.962	0.989974	0.125007	0.0160796	0.125039	0.0156329	0.177758
086__8-HEPE	0	0	0	0	0	0	0	0	11.9703	0	579.407	304.676	370.872	546.695	599.465	88.657	100.073	170.767	188.006	68.4619	0.373901	0.0012955	0.0064764	0.0013066	0.0066988	0.000534
089__8,9-EpETE	0	106.157	0	0	123.874	0	0	0	0	0	5395.43	3578.02	2318.28	3381.01	4170.72	808.84	623.59	1049.21	993.818	676.574	0.179492	0.00177	2.12e-05	0.0017215	0.0005905	0.003863
091__11-HEPE	84.7766	55.4397	29.7549	93.0055	130.39	64.6077	63.6343	64.1289	85.988	98.573	2370.35	899.43	896.249	1332.31	1049.73	255.256	475.923	485.062	343.115	215.28	0.863754	0.0111524	0.0056871	0.0111479	0.0067988	0.0246272
093__12-HEPE	332.031	147.616	63.6877	295.568	455.69	356.329	96.7552	844.642	137.476	377.192	23163.5	5644.84	9181.4	8072.2	9598.98	1836.39	2450.56	2235.88	1963.87	2568.66	0.509419	0.0243368	1.5e-06	0.0250316	1.15e-05	0.0444118
095__11,12-EpETE	51.1736	118.226	59.3353	85.6193	110.427	67.9964	72.5226	36.7766	76.1568	0	5061.66	3039.62	2453.55	3438.99	4443.95	516.491	447.342	744.167	624.072	542.855	0.119744	0.0015807	0.0003936	0.0015236	0.0002684	0.0025918
097__15-HEPE	97.589	133.505	50.828	111.261	145.116	135.521	0	179.257	172.202	339.698	4399.91	988.481	1509.97	1961.15	1711.69	684.599	528.292	549.019	609.925	485.503	0.358182	0.0277133	2e-06	0.0300294	0.0002308	0.0599262
099__14,15-EpETE	210.271	277.223	171.627	199.813	258.468	146.298	205.857	115.799	101.327	222.883	16435.1	9339.5	5876.87	9089.47	10920.3	1915.92	1274.07	2462.69	2087.5	1501.25	0.0687938	0.0042897	0.0014493	0.0041891	0.0012098	0.0076675
101__18-HEPE	0	0	0	19.8391	29.2163	0	0	0	0	30.6782	633.734	392.647	366.912	783.336	500.89	68.1001	129.807	189.601	156.579	96.9892	0.684301	0.002421	0.0038794	0.0023595	0.0034366	0.0049661
103__17,18-EpETE	375.114	349.213	258.955	375.37	425.378	216.367	343.968	230.625	261.282	266.738	27579.2	13571.9	8164.14	11686.6	15329.2	2832.83	2008.72	3164.94	2751.98	2279.72	0.0296702	0.0106672	0.0003418	0.0104413	0.0003066	0.0183673
105__17,18-diHETE	0	0	0	0	0	0	0	0	0	0	1647.48	1113.32	1108.05	1844.71	1456.23	600.954	0	801.721	0	0	No info.	0.0005957	0.183589	0.0005957	0.183589	0.0009624
154__RvD2	0	0	0	0	1.66501	0	0	0	0	0	0	0	0	0	0	0	0	0	0	0	0.373901	0.373901	0.373901	No info.	No info.	No info.
158__4-HDoHE	209.532	440.984	214.759	457.235	1089.5	506.084	1019.39	773.452	997.426	1184.3	836.522	373.687	500.39	1032.09	687.193	1807.02	2996.18	5605.54	5226.12	4008.48	0.0713174	0.336079	0.0068302	0.240739	0.0116392	0.0091577
161__7-HDoHE	68.2414	61.555	72.791	73.8786	261.466	118.04	0	215.288	0	232.612	149.189	135.329	129.591	154.304	137.75	420.377	563.028	1116.9	1161.57	613.34	0.93161	0.433524	0.0101323	0.60693	0.0032958	0.0140573
162__8-HDoHE	120.676	192.523	87.995	220.378	461.14	234.229	285.494	326.176	407.575	307.777	370.076	173.499	214.844	428.646	265.777	1126.68	1294.41	2749.73	1794.56	1519.63	0.217488	0.388093	0.0055552	0.706109	0.0081329	0.0072713
165__10-HDoHE	73.7491	98.8549	61.9718	83.7804	172.054	84.4174	107.38	166.239	117.69	141.07	186.724	84.602	147.112	186.048	145.367	551.284	653.273	1023.12	758.565	684.349	0.323191	0.0903796	0.0009228	0.287528	0.0012832	0.0013518
166__11-HDoHE	84.3376	114.485	97.5318	133.926	347.155	155.025	295.718	233.008	263.525	238.286	207.74	145.619	188.216	326.642	258.303	712.472	855.357	1253.55	1361.8	1119.53	0.168676	0.261179	0.000122	0.769266	0.0020413	0.0016811
170__13-HDoHE	203.345	276.95	135.459	225.371	307.122	261.818	332.727	268.875	216.887	282.947	317.136	182.627	177.516	330.749	229.219	853.615	1075.04	1565.46	1233.31	1046.37	0.256595	0.697588	0.0010251	0.520864	0.0015375	0.0010456
171__14-HDoHE	547.299	729.505	289.454	808.177	1062.03	1181.12	674.785	1597.92	336.065	1614.28	2124.53	736.487	1033.02	821.945	861.828	5703.53	5159.57	3825.56	4462.02	5733.36	0.203635	0.174729	4.2e-06	0.925647	2.37e-05	2.61e-05
175__16-HDoHE	155.193	170.348	146.76	219.615	392.101	210.051	320.606	311.169	311.253	386.874	285.949	174.542	355.321	485.373	326.712	1382.92	1115.73	2138.11	2392.18	1580.7	0.12769	0.148191	0.0026546	0.768627	0.0037304	0.0034465
176__17-HDoHE	481.001	905.907	425.987	1062.39	1684.54	1568.22	1774.42	2247.61	1255.47	2969.01	1455.1	581.339	1173.64	1942.86	1116.93	4927.4	4610.46	8443.85	8041.85	6050.51	0.0233535	0.314814	0.0014397	0.0936238	0.0007348	0.0019244
178__16,17-EpDPE	2325.74	2390.28	1860.83	1985.88	2850.42	3033.17	3391.12	2599.61	2446.34	3110.66	5770.8	3399.68	2562.37	4779	4055.12	20310.3	15573.5	22206.1	18307.3	20850.6	0.0322827	0.0266792	9.29e-05	0.0961753	0.0001086	2.2e-06
180__20-HDoHE	183.29	203.508	140.976	310.712	707.906	327.005	357.073	455.584	528.934	693.53	548.634	290.911	334.387	709.989	372.768	1337.34	1708.92	2789.71	2488.14	2077.65	0.220302	0.305134	0.0002294	0.841638	0.0026616	0.0022859
181__19,20-EpDPE	4487.27	4861.49	3324.83	3817.52	5229.35	5881.65	5982.09	4755.76	5057.67	6126.82	9826.06	6319.86	4150.09	8104.41	5894.56	37079.7	27025.6	39136.9	36181.6	36490.5	0.0247206	0.0407638	9.42e-05	0.259324	0.0001234	1.9e-06
182__19,20-diHDoPE	234.201	308.645	246.284	417.833	329.184	347.812	387.312	369.123	363.592	467.681	561.985	469.523	576.253	935.956	402.479	1222.54	2022.88	1977.78	1250.82	1178.25	0.0757373	0.0205904	0.0027228	0.0931175	0.0038058	0.0022488
183__21-HDoHE	0	0	0	0	0	0	0	0	0	214.165	237.886	111.022	0	261.675	101.874	525.931	509.945	652.306	406.798	382.999	0.373901	0.0414248	0.0005	0.160323	0.0001092	0.0008302
196__10,17-diHDoHE	32.9825	0	0	0	0	0	0	0	0	0	0	0	0	0	0	0	0	0	0	0	0.373901	0.373901	0.373901	No info.	No info.	No info.
262__9-HODE	1412.39	1137.85	797.095	1292.37	1781.42	1791.68	1563.1	2039.46	2224.8	2393.91	1518.94	754.231	750.585	1035.49	1209.78	1661.81	1292.42	1524.35	1728.7	1411.36	0.0113189	0.320108	0.22053	0.0018394	0.0218208	0.0220146
263__9,10-EpOME	10172.6	8376.05	7638	7948.1	11547.3	13002.6	12690.7	10994.8	15497.9	17633.2	18863.5	9599.4	7039.32	13571.3	11590.4	13729.7	12591.1	17079	15840.2	14637	0.0082165	0.198053	0.0008142	0.451819	0.579501	0.253713
264__9,10-diHOME	475.158	389.494	453.834	412.566	601.65	480.668	747.253	719.676	1258.83	746.419	611.577	402.055	463.235	619.178	576.273	527.698	618.643	692.716	541.752	652.769	0.0618664	0.266995	0.0205917	0.0933079	0.226252	0.215095
265__13-HODE	2272.02	1798.04	1458.13	2008.88	2829.33	3025.95	3205	3861.23	4229.79	4406.81	2617.24	1374.3	1419.74	2558.38	1736.46	2030.93	2368.1	2940.06	2153.62	2099.2	0.0016014	0.72072	0.413672	0.0015735	0.002091	0.26936
266__12,13-EpOME	11020.2	9705.01	8399.82	9133.55	12619.2	14496	13861.1	12270.2	17430.2	18636.9	21785.6	10809.5	7756.57	16375.5	12121.3	16585	13993.7	18750.4	17148.7	18413.4	0.0059433	0.220415	0.0003121	0.577684	0.289917	0.248587
269__9-oxo-ODE	2482.48	2158.14	1776.9	2285.82	4970.87	3064.96	3810.69	4547.58	9984.01	8282.09	3842.19	1743.61	2063.07	4379.45	3028.79	2125.14	2778.8	5465.67	4438.23	2979.13	0.060666	0.725708	0.353107	0.0770981	0.147129	0.50899
272__9-HOTrE(n3)	65.0786	36.6567	30.7323	24.3869	77.0126	41.358	52.6736	58.1291	110.019	81.193	64.4376	17.2385	14.9957	41.2261	48.4606	75.6338	45.4924	49.0713	79.879	77.9508	0.207041	0.514737	0.177543	0.0760951	0.835908	0.0467875
275__13-HOTrE(n3)	60.2763	70.0008	44.4628	57.6328	81.4259	128.924	77.8794	131.545	119.589	194.898	81.8699	26.0416	36.9264	68.5669	50.5934	84.959	68.9725	77.7787	80.1955	72.4399	0.0089273	0.427084	0.0720052	0.0065436	0.0449593	0.0758251
281__9-oxo-OTrE(n3)	39.7271	27.022	0	31.4764	113.676	41.3784	59.9423	51.5001	156.703	112.944	0	0	0	64.2901	47.6705	68.5529	57.4329	56.7824	0	51.476	0.184455	0.42164	0.847634	0.04367	0.170114	0.221233
303__PGE1	991.876	934.444	387.232	1296.35	948.502	1087.22	1157.47	1994.32	899.695	1823.27	559.013	309.307	148.481	349.596	333.148	277.34	1143.84	1453.05	289.462	251.118	0.103606	0.007443	0.460719	0.0064353	0.0673527	0.256558
314__15-HETrE(n6)	362.487	307.07	157.526	379.288	457.798	393.689	379.116	308.694	275.775	433.292	326.158	181.21	117.6	204.051	128.572	150.207	288.516	429.345	228.658	196	0.672992	0.0533222	0.316438	0.0076659	0.114454	0.303852
318__LTB3	0	0	0	0	0	0	0	0	0	0	0	0	0	0	0	0	0	0	4.25861	0	No info.	No info.	0.373901	No info.	0.373901	0.373901
319__5-HETrE(n9)	0	0	0	0	44.0515	0	0	0	0	0	0	0	0	0	0	0	0	0	0	0	0.373901	0.373901	0.373901	No info.	No info.	No info.
355__16:0 Palmitic Acid	446723	540056	434621	568604	629589	713950	686747	836633	753450	1.043e+06	608182	564517	417511	623787	533887	505092	693537	731591	645912	607892	0.0051246	0.635368	0.0690046	0.0083553	0.0536645	0.141894
356__16:1 Palmitoleic Acid	13343.7	14894.3	13625.3	15859	15836.9	17364.7	12595.5	13935.4	11810.9	22692.7	14501.5	9941.39	9062.25	16379.5	10158.2	9162.19	17058.5	12458.1	9698.34	10286.4	0.660618	0.117044	0.0889939	0.174271	0.147615	0.895898
357__18:0 Stearic Acid	246516	309878	238441	298412	337953	354015	396504	431435	418491	521072	300233	324141	229905	339586	291913	276461	337742	375137	334397	318644	0.0033218	0.694141	0.127536	0.0051478	0.0167978	0.240204
358__18:1 Oleic Acid(n9)	87091.3	95178.7	78742.5	93350.4	103338	112097	92321.8	108553	93198.5	156709	94014.3	73727.2	58161.8	90510.3	67892.5	65116.2	103627	94504.1	74099.5	80477.3	0.128987	0.101544	0.351698	0.0298803	0.065832	0.50909
359__18:2 Linoleic Acid	212391	221172	178638	194260	245395	281464	230596	274279	273398	450336	239748	184365	155078	218179	202134	230011	300164	257647	257566	268611	0.0728814	0.585485	0.0115274	0.0367708	0.372387	0.0089909
360__18:3 a-Linolenic Acid(n3)	27026.1	19871.5	18676.3	17145.4	24269.4	34591.6	20969	25669.9	35249.7	43437.5	29593.1	19598.6	15828.2	22124.9	19793.6	29055.4	31196.9	26363.4	21264.4	23893.3	0.0408003	0.997351	0.0882248	0.048323	0.228442	0.124178
361__18:3 g-Linolenic Acid(n6)	10637.8	8690.65	10385	13105.6	13033.3	18190.5	13043.7	14526.2	18459.7	25137	13446.6	12837.8	10902.3	8401	7403.97	16367.2	13791.9	12095.3	7725.19	8963.89	0.0179463	0.705013	0.738216	0.0165553	0.0487975	0.562904
363__20:3 DGLA(n6)	14500.3	19648.9	16404.9	18892.1	23808.9	12535	13540.7	15032.5	10189.1	25304.9	20243.9	13413	10492	14962.5	14661.1	15349.3	24814.4	25202.9	22141.1	21347.5	0.30773	0.119711	0.224836	0.857845	0.0754651	0.0182808
364__20:3 Mead Acid(n9)	1961.45	2436.09	1779.88	2195.87	2734.02	674.866	520.798	483.306	378.955	818.791	1069.19	736.076	454.643	796.884	505.996	451.846	961.733	908.494	529.08	473.695	2.09e-05	7.13e-05	5.81e-05	0.338391	0.526818	0.769295
365__20:4 ETA(n3)	461.354	712.379	801.282	781.235	798.485	511.631	493.854	934.232	604.137	1108.81	1587.03	1296.08	1095.2	1265.62	1264.98	475.996	633.774	575.831	526.941	942.276	0.891583	0.0004199	0.465481	0.0046073	0.520614	0.0003758
366__20:4 Arachidonic Acid(n6)	521288	717321	450552	559313	777783	1.65241e+06	1.49679e+06	1.52012e+06	1.27589e+06	2.39885e+06	411493	328055	245811	334425	311629	264821	412713	427250	399544	288481	0.0036742	0.0031151	0.0078905	0.0019959	0.0020618	0.474747
367__20:5 EPA	10053.7	14061.9	11498.6	13152.9	16558.6	9299.98	7432.82	7125.33	6603.87	10849.8	434956	373572	287173	314564	374633	75368.1	87729.6	88965.4	86286.2	64731.6	0.0078454	0.0001804	7.18e-05	0.0001724	7.2e-05	0.0003296
368__22:4 Adrenic Acid	18128.9	25136.1	17627.9	20260.9	32483	93689.2	94336	96719	66281.3	158881	4598.54	4141.8	3344.89	5007.23	3944.59	3033.4	4644.9	4470.15	4027.92	4035.17	0.0058551	0.0024877	0.002409	0.0030547	0.0030358	0.68946
369__22:5 DPA(n3)	12551.3	19206.1	14484.4	19145.8	23785.1	15062.5	14088.2	15907.7	10978.4	23542.2	155315	126867	109093	123854	130861	21862.8	33088.6	31883.8	29344.5	28002.6	0.522616	5.74e-05	0.0042315	4.93e-05	0.0019546	9.22e-05
370__22:5 Osbond Acid(n6)	2525.33	2795.39	2291.54	2354.31	4073.54	11376.8	11097.9	10854.4	7663.68	17411	0	0	0	0	0	236.585	380.325	353.875	423.265	312.986	0.0042067	0.0010245	0.0015859	0.001796	0.0020036	0.0004242
371__22:6 DHA	68564.7	98398.5	73760	89351.1	114635	101211	92707.9	91421.5	59385.3	119277	119685	109268	84778.3	115216	102446	411424	527910	446504	436868	440268	0.771044	0.132331	1e-07	0.274127	2e-07	2.06e-05

## Sheet: Lung pg_100mg
Sample Name	Control_lung_No.1	Control_lung_No.2	Control_lung_No.3	Control_lung_No.4	Control_lung_No.5	AA_lung_No.16	AA_lung_No.17	AA_lung_No.18	AA_lung_No.19	AA_lung_No.20	EPA_lung_No.6	EPA_lung_No.7	EPA_lung_No.8	EPA_lung_No.9	EPA_lung_No.10	DHA_lung_No.11	DHA_lung_No.12	DHA_lung_No.13	DHA_lung_No.14	DHA_lung_No.15	Q-values (Control vs ARA)	Q-values (Control vs EPA)	Q-values (Control vs DHA)	Q-values (ARA vs EPA)	Q-values (ARA vs DHA)	Q-values (EPA vs DHA)
001__PGE2	697.115	1454.64	415.368	110.287	835.125	1794.64	1136.01	642.961	1338.64	700.32	137.714	308.748	133.17	93.9271	71.8538	228.293	51.0494	154.718	45.8226	143.741	0.212625	0.0691653	0.0616981	0.0092206	0.0087103	0.664454
002__PGD2	750.519	2109.13	1438.76	581.189	886.605	2243.23	1483.25	1652.36	2208.11	871.099	151.99	564.881	395.463	351.834	337.052	257.355	178.557	328.432	546.697	471.864	0.191305	0.0449096	0.0442139	0.0050469	0.0049395	0.970051
004__15-keto-PGE2	506.068	2215.29	1059.6	136.739	560.408	4348.06	2698.88	3948.73	1332.24	1405.24	61.7716	462.926	81.5757	50.4929	273.168	232.333	74.3066	279.378	477.295	145.127	0.0334173	0.12113	0.145036	0.0143298	0.015597	0.612424
007__15-deoxy-PGJ2	30.865	0	0	0	0	0	0	0	0	0	0	0	0	0	0	0	0	0	0	0	0.373901	0.373901	0.373901	No info.	No info.	No info.
008__PGF2a	187.552	368.061	189.951	74.8245	272.879	568.176	553.808	432.216	566.864	226.403	34.7804	174.8	57.7727	39.1822	73.1884	71.7923	0	42.9108	64.519	57.426	0.015625	0.0323017	0.0225255	0.0005306	0.0025504	0.347081
009__6-keto-PGF1a	17513.2	42574.2	20676.7	12669.3	21780.8	31046.5	29739.3	22742.6	43392.8	16615.2	3811.97	14136.5	7773.21	7013.53	13456.2	6657.17	6275.92	3862.77	14983.5	7189.28	0.430452	0.0363962	0.0236005	0.0041506	0.0026481	0.611511
011__TXB2	351.282	816.283	763.937	260.696	564.429	1501.25	2333.34	1848.69	1186.23	1263.99	45.6676	412.081	162.82	299.768	177.567	172.573	122.316	234.412	258.338	339.904	0.0019393	0.0302867	0.0226357	0.0017375	0.0022805	0.937229
012__12-HHTrE	480.281	1622.18	777.834	303.755	611.257	1219.29	682.311	600.02	951.311	468.237	122.319	437.597	227.762	270.67	299.896	206.094	119.086	149.947	305.326	279.103	0.926896	0.100439	0.0749055	0.0073682	0.0111653	0.367651
014__LTB4	0	220.175	0	0	0	0	0	0	0	0	0	0	0	0	0	0	0	0	0	0	0.373901	0.373901	0.373901	No info.	No info.	No info.
028__5-HETE	248.235	424.786	105.654	165.019	177.771	3106.33	2858.38	2714.12	1414.48	1336.08	280.726	193.94	181.971	120.987	164.507	79.7324	303.878	452.323	646.235	148.815	0.0050214	0.572297	0.407322	0.0050225	0.0051383	0.256083
029__5,6-EET	241.462	862.754	165.987	479.587	378.105	1415.53	1010.88	1747.43	2736.02	2236.6	171.55	309.68	210.236	119.865	329.432	75.3878	167.983	241.939	488.316	112.566	0.0026229	0.162709	0.181416	0.0057655	0.0048955	0.89934
030__5,6-DHT	0	15.1531	0	0	0	147.337	185.727	327.376	263.016	237.185	0	0	0	0	18.7976	0	13.3699	0	0	0	0.0017204	0.883755	0.931854	0.0016913	0.0017311	0.819888
031__8-HETE	0	320.14	0	280.073	0	1037.82	569.901	957.874	497.941	1428.52	0	197.037	0	0	226.06	0	0	0	0	0	0.002925	0.705027	0.179074	0.006638	0.0060416	0.179144
032__9-HETE	0	175.048	0	0	0	1368.09	464.8	1478.58	477.929	687.115	0	0	0	0	0	0	139.434	247.942	340.082	0	0.0164697	0.373901	0.183641	0.0151922	0.024201	0.0968813
033__8,9-EET	0	1509.48	0	1591.38	1823.61	7413.64	6064.12	5406.14	8078.51	7103.68	0	0	0	0	0	0	0	0	0	0	1.47e-05	0.0720105	0.0720105	0.0001418	0.0001418	No info.
034__8,9-DHT	34.7431	46.9799	21.0189	29.8345	35.5846	0	131.241	320.142	129.908	114.949	14.6039	0	21.6958	0	0	0	25.985	37.3707	0	0	0.109059	0.002874	0.0485464	0.0618621	0.0688296	0.57227
035__11-HETE	432.718	1127.57	633.502	401.91	780.659	1745.76	1178.06	986.489	967.583	722.933	116.964	427.988	313.865	201.102	320.333	256.757	239.864	312.565	513.008	224.276	0.0748458	0.0234209	0.0334096	0.0061399	0.0072408	0.670979
036__12-HETE	449.203	2866.76	2138.11	879.59	1132.48	7328.48	27704.2	2264.11	2822.73	6048.89	179.15	1630.19	535.894	1587.88	735.96	298.305	1091.18	799.702	627.45	839.174	0.176257	0.320441	0.16265	0.153212	0.145681	0.541885
037__11,12-EET	1606.98	2714.7	706.442	2093.59	2308.81	12480.8	10040.9	8616.87	13761.9	10523.5	1477.21	2058.98	1654.47	835.954	1845.45	698.801	1453.31	1626.75	2548.85	1144.39	1.3e-05	0.461445	0.420952	0.0003132	8.7e-06	0.834781
038__11,12-DHT	18.7234	32.7704	11.4178	32.8095	18.2429	107.388	100.766	165.275	107.194	90.6294	9.60822	26.2584	15.6396	11.6843	28.1625	9.23222	13.2446	31.3721	29.6455	0	0.0001643	0.451701	0.434243	0.001192	0.0001441	0.831028
039__15-HETE	401.375	1212.59	463.497	478.395	713.93	3096.76	1589.08	2336.21	1393.02	963.053	103.356	377.146	350.216	226.975	502.933	243.674	314.363	384.871	493.642	251.463	0.0168494	0.0709694	0.101948	0.0133361	0.0146597	0.765486
040__14,15-EET	2969.59	5162.59	1543.34	4468.73	4762.91	21469.2	20224.5	16384.7	26769.9	19578.3	2985.5	3941.08	3120.55	1704.72	3865.53	1518.58	3127.47	2767.79	4395.54	1825.29	1.36e-05	0.425153	0.246591	0.0002967	0.0002089	0.559211
041__14,15-DHT	51.5401	82.4088	38.6476	80.4236	48.0276	279.697	208.249	409.597	254.989	244.938	17.7126	54.7097	25.7656	26.8359	55.6574	7.7694	41.6773	43.2325	84.2076	30.7419	0.002323	0.0784414	0.256253	0.0016107	0.0001898	0.723953
042__16-HETE	0	42.8951	0	0	0	242.629	110.909	267.412	61.9561	81.122	0	0	0	0	0	27.8692	0	51.1112	0	0	0.0262285	0.373901	0.605926	0.0230796	0.0304525	0.20158
044__17-HETE	0	0	0	0	0	56.0901	0	0	0	0	0	0	0	0	0	0	0	0	0	0	0.373901	No info.	No info.	0.373901	0.373901	No info.
046__18-HETE	29.5547	51.1387	58.8885	67.5205	55.0181	178.091	174.42	138.385	112.009	105.046	19.3244	18.4214	32.3373	60.7626	41.276	0	28.2536	26.9618	28.3839	0	0.000638	0.111829	0.0049872	0.0002429	7.02e-05	0.127023
048__19-HETE	0	0	0	0	0	182.569	198.693	234.982	56.6249	212.287	0	0	0	0	0	0	0	0	0	0	0.0048177	No info.	No info.	0.0048177	0.0048177	No info.
051__5-oxo-ETE	105.02	173.794	59.8378	162.705	67.9001	2412.74	1252.1	3232.6	347.53	728.821	0	96.8029	0	0	161.407	64.4102	78.8803	352.39	800.808	0	0.0509787	0.165171	0.385033	0.0452268	0.0662817	0.237406
054__15-oxo-ETE	71.2887	154.684	64.5546	119.142	87.3171	1811.83	730.927	1854.74	302.575	520.629	23.7304	107.031	66.777	70.3893	188.891	54.9917	80.1083	290.267	569.266	49.4485	0.0454018	0.810319	0.340537	0.0441154	0.0624083	0.315352
056__5,6-diHETE-1	0	0	0	0	0	0	0	0	0	932.996	0	0	18.5771	0	0	0	0	0	0	0	0.373901	0.373901	No info.	0.382579	0.373901	0.373901
065__PGE3	0	0	0	0	0	0	0	0	0	0	50.811	134.461	58.8269	0	0	0	0	0	0	0	No info.	0.119315	No info.	0.119315	No info.	0.119315
070__6-keto-PGF1a-17delta	0	308.93	159.274	0	0	0	0	0	0	0	353.682	841.272	649.089	535.813	1045.23	0	0	385.62	254.643	0	0.205673	0.0023464	0.744779	0.0046419	0.189512	0.0048933
071__TXB3	0	0	0	0	0	0	0	0	0	0	0	101.321	0	75.102	0	0	0	0	0	0	No info.	0.184036	No info.	0.184036	No info.	0.184036
083__5-HEPE	0	45.6816	0	41.6215	0	0	59.4592	58.033	47.0858	0	933.464	724.786	526.871	411.37	609.175	77.9595	97.6395	259.381	274.889	83.6546	0.398201	0.0020396	0.0316168	0.0021458	0.0448784	0.0012908
086__8-HEPE	0	0	0	0	0	0	0	0	0	0	31.2957	76.3531	45.2859	122.934	96.2329	0	33.8584	51.5417	54.8684	0	No info.	0.0110678	0.0795135	0.0110678	0.0795135	0.0537425
089__8,9-EpETE	0	0	0	0	0	0	0	0	0	0	661.529	1269.82	974.503	943.304	819.625	92.8275	177.991	271.944	247.279	145.366	No info.	0.0007453	0.0046767	0.0007453	0.0046767	0.0001055
091__11-HEPE	0	64.0844	55.9202	35.7479	27.8508	0	29.6749	0	41.5571	0	95.2097	345.517	230.234	208.44	329.128	43.2376	41.6668	175.38	113.559	71.7323	0.156818	0.0090868	0.0942759	0.0065262	0.0231661	0.0186635
093__12-HEPE	54.9609	158.083	239.339	75.9542	80.7019	120.06	282.744	89.9915	171.556	168.75	224.559	2496.6	734.871	4486.22	1321.3	120.949	480.203	316.379	224.068	413.65	0.372164	0.0847905	0.0318035	0.0905309	0.0806673	0.112123
095__11,12-EpETE	16.7952	42.8672	0	45.7656	18.2087	37.0534	30.438	0	27.3739	27.2856	529.681	1370.48	726.611	728.87	846.757	79.9361	122.792	162.029	193.321	109.735	0.978561	0.0044728	0.0010367	0.004499	0.0038324	0.0071139
097__15-HEPE	30.2852	63.219	63.062	43.6886	0	117.834	53.8115	0	0	56.1868	162.704	485.014	117.048	759.224	418.319	95.713	0	202.923	133.422	121.008	0.829808	0.040083	0.0779641	0.0411623	0.137993	0.0746698
099__14,15-EpETE	58.2526	116.195	0	90.2647	59.1542	109.977	70.6501	0	87.0565	68.1272	1749.83	3825.45	1804.36	1968.31	2170.27	218.006	389.918	491.544	510.917	311.745	0.931049	0.0044058	0.0005874	0.0044282	0.0005931	0.0072441
101__18-HEPE	0	0	0	0	0	0	0	0	0	0	26.7883	80.1363	53.418	64.2852	126.215	0	17.0199	44.9212	63.0176	31.4811	No info.	0.0131003	0.0454197	0.0131003	0.0454197	0.0847121
103__17,18-EpETE	75.41	159.664	89.5014	155.799	73.6534	148.813	0	141.726	130.946	104.135	2394.39	5220.39	3026.96	2718.18	3589.57	298.69	531.023	609.402	558.424	436.431	0.8696	0.0027378	0.0001941	0.0026992	0.0002505	0.0041018
105__17,18-diHETE	0	0	0	0	0	0	0	0	0	0	478.641	880.814	299.835	772.107	769.245	377.374	0	368.915	0	0	No info.	0.0040799	0.177844	0.0040799	0.177844	0.0084853
154__RvD2	0	0	0	10.1616	0	0	0	0	0	0	0	0	0	0	0	0	0	0	0	0	0.373901	0.373901	0.373901	No info.	No info.	No info.
158__4-HDoHE	87.5368	157.383	0	224.087	0	662.55	418.831	899.994	227.791	274.806	47.1293	213.069	137.12	0	267.389	418.272	700.058	2051	2858.37	270.735	0.0165901	0.571875	0.0836096	0.0277166	0.211847	0.0910471
161__7-HDoHE	0	0	0	55.7084	0	56.5517	135.437	138.516	0	141.196	0	0	0	0	59.8668	80.9268	145.682	334.552	363.368	130.373	0.0260558	0.960691	0.0241125	0.0283561	0.106586	0.0242676
162__8-HDoHE	58.0966	93.0118	0	88.8718	0	191.513	131.43	364.97	132.981	171.814	32.7743	81.6821	63.3793	59.1286	94.4382	226.725	519.141	1016.13	1110.67	293.877	0.0135906	0.450366	0.0322991	0.0355035	0.0749835	0.0359863
165__10-HDoHE	27.1284	29.0279	0	27.7921	25.1447	56.6499	69.4432	59.3247	31.3931	73.9983	13.8927	33.1109	28.8548	66.6164	44.0847	65.4077	190.989	273.713	267.366	98.1318	0.0042926	0.173027	0.0204122	0.107138	0.0459273	0.0276788
166__11-HDoHE	33.8618	50.644	0	0	0	135.303	106.625	264.043	50.3836	133.736	0	0	43.4717	0	69.3433	84.0272	166.838	409.316	575.723	85.2604	0.0231447	0.760369	0.0646905	0.0159074	0.259835	0.0685966
170__13-HDoHE	61.4846	108.715	73.2194	60.0286	74.3406	160.245	143.641	115.873	56.9764	105.294	31.5807	74.6755	65.3336	75.8901	131.273	177.025	186.555	351.786	323.477	153.984	0.0733718	0.991836	0.0150452	0.127901	0.0257757	0.0060808
171__14-HDoHE	64.3147	305.201	206.755	150.617	102.921	438.054	645.394	131.858	160.129	335.864	88.3845	371.352	186.678	609.763	255.778	436.092	1415.73	809.997	621.536	598.388	0.126827	0.205669	0.0211421	0.767294	0.0565637	0.0392728
175__16-HDoHE	51.1987	76.2728	53.2145	45.4992	20.1948	159.476	127.18	268.952	69.5542	126.646	19.6331	60.481	45.5551	67.9974	118.005	135.145	341.354	548.046	681.601	237.015	0.0351877	0.500394	0.0272657	0.0435094	0.0538037	0.0301507
176__17-HDoHE	131.986	363.18	141.838	254.226	110.014	798.883	677.518	1102.68	385.17	828.8	0	299.194	189.366	272.539	334.504	517.53	609.729	1594.24	2101.77	497.239	0.0021749	0.811447	0.0584634	0.0033308	0.40867	0.0618574
178__16,17-EpDPE	546.696	1066.54	405.082	1168.59	1076.47	2019.86	2123.56	1853.71	2502.5	2101.84	1184.11	2794.6	1666.37	1471.53	1659.79	2739.24	7157.94	5571.86	6563.29	4284.64	0.0001536	0.0211871	0.0044951	0.249927	0.0162764	0.0031554
180__20-HDoHE	85.8517	107.178	51.9444	105.216	44.0803	281.364	283.369	441.265	89.5044	211.81	36.3399	126.809	75.0397	97.0054	181.166	189.804	520.463	1145.69	1586.3	279.829	0.0311179	0.404791	0.0683126	0.0343593	0.147535	0.075203
181__19,20-EpDPE	1169.84	2098.2	711.935	2285.56	1959.1	4253.72	4341.49	3587.87	5155.78	4232.24	1950.87	4753.67	2741.66	2425.8	3383.71	5215.37	13361.3	10794	13087	7623.47	0.0001341	0.0391128	0.0053662	0.0493005	0.0216994	0.0094047
182__19,20-diHDoPE	176.597	451.421	139.775	232.553	150.779	230.543	176.19	551.154	167.935	131.916	107.931	193.68	157.84	191.281	310.736	446.714	777.372	722.313	1452.5	866.458	0.829412	0.584474	0.0074494	0.498209	0.0108634	0.0149014
183__21-HDoHE	91.7532	156.402	122.061	163.636	54.7809	99.8924	197.352	171.137	0	0	101.961	121.474	137.353	192.632	162.087	220.82	393.911	418.978	568.13	368.198	0.616395	0.353355	0.0015929	0.297491	0.0024909	0.0087176
184__22-HDoHE	0	0	0	0	0	0	78.9527	0	0	0	0	34.7546	0	0	0	63.2055	110.754	87.8916	157.901	0	0.373901	0.373901	0.0325937	0.622241	0.0562088	0.040012
262__9-HODE	378.765	864.987	938.612	735.71	507.931	777.421	1113.37	714.113	829.869	1152.39	194.747	1030.52	526.099	679.366	882.392	484.368	642.313	765.358	1799.74	410.701	0.13341	0.903123	0.634459	0.174153	0.726969	0.602506
263__9,10-EpOME	2665.12	3635	2411.19	6462.31	3483.94	9393.96	12771	7276.16	8636.04	10879.9	2923.87	13549	3996.59	8299.13	5199.19	2629.73	6604.61	6095.61	8946.15	4063.76	0.0009354	0.172704	0.175902	0.197796	0.0210615	0.622826
264__9,10-diHOME	196.936	291.909	248.571	394.463	173.31	303.559	293.991	540.133	311.292	419.447	157.853	224.245	178.06	236.057	258.368	155.371	204.604	293.927	462.909	276.537	0.104434	0.281479	0.794339	0.0127136	0.215554	0.257711
265__13-HODE	726.901	1479.96	1765.11	1218.4	759.602	1651.44	1856.67	1635.13	1263.7	1714.3	419.578	1298.63	1065.02	1437.16	1429.01	911.366	568.151	1264.23	2865.03	1028.33	0.0891683	0.833727	0.767102	0.0495014	0.507382	0.667616
266__12,13-EpOME	2949.36	4295.08	2496.95	7664.14	4151.53	10513.4	15437.8	8304.81	11066.7	14501.2	3280.46	14661.3	5076.34	8387.88	6010.25	2651.03	8024.8	6274	8783.94	4109.66	0.0013862	0.182392	0.291758	0.0958219	0.0091012	0.526564
269__9-oxo-ODE	747.504	1067.33	721.935	1554.5	476.542	3471.63	2612.29	5676.58	1382.94	3028.18	495.766	1491.01	708.128	1104.7	1546.22	555.786	627.796	1965.91	6228.81	611.994	0.0275732	0.592159	0.379525	0.0342709	0.368499	0.446792
272__9-HOTrE(n3)	16.5797	18.8712	29.9213	40.3145	14.2246	17.9535	22.9612	32.368	42.4396	76.0808	7.84294	19.4026	17.0082	29.4435	23.1689	11.9486	10.265	15.1601	21.2278	17.9057	0.243405	0.468162	0.138504	0.120161	0.0885225	0.347483
275__13-HOTrE(n3)	24.9864	70.748	53.4483	48.6329	24.6601	61.282	102.181	45.4503	42.1542	83.8035	17.1304	49.1735	35.6918	111.128	27.2542	28.7296	26.341	27.3581	60.8724	41.6361	0.159231	0.853835	0.514767	0.376725	0.0531785	0.552227
281__9-oxo-OTrE(n3)	0	0	0	21.4614	0	22.9598	0	106.072	0	32.0359	0	23.583	0	0	0	0	0	0	47.6015	0	0.228848	0.948584	0.630121	0.235646	0.3265	0.663183
303__PGE1	128.426	480.712	207.252	34.7198	258.317	355.036	258.557	212.681	238.495	104.631	36.2631	96.1099	42.1907	62.8652	71.9838	145.167	98.1807	92.37	136.565	154.269	0.891367	0.0993356	0.269198	0.0110504	0.0521342	0.005053
314__15-HETrE(n6)	112.6	216.08	111.115	78.8925	216.612	333.138	290.993	200.246	188.303	147.972	35.9594	75.5579	82.1408	58.738	85.0405	89.8413	102.536	120.51	180.942	95.088	0.0950678	0.0489078	0.405695	0.0071821	0.017282	0.0290788
355__16:0 Palmitic Acid	430556	515483	761513	620263	359726	1.04884e+06	734135	858483	746844	662425	396879	857543	367300	952759	577915	299643	464141	563737	822869	756909	0.0236894	0.520387	0.721407	0.224719	0.086235	0.755977
356__16:1 Palmitoleic Acid	12688.8	19039	22950	21418.5	13938	41542.4	42151	29934.5	27366.5	27460.1	12747.3	54674.3	12452.4	48413	24317.2	9038.49	15253.4	22172.8	13391.2	16731.8	0.0039728	0.235986	0.38869	0.747562	0.0017425	0.164686
357__18:0 Stearic Acid	201958	242171	347998	237948	161318	445787	269950	314341	311945	284634	185419	250462	148759	404218	206934	134596	199285	214115	292893	382896	0.0836032	0.987444	0.90544	0.151284	0.166581	0.929876
358__18:1 Oleic Acid(n9)	51587	63039.8	76019.6	80148.2	44525.9	135109	107603	75351.3	81876.9	86932	37351.1	156347	39236.2	170611	64393.5	27889.5	47800.1	62963.9	71655.2	68584	0.0282778	0.358376	0.511041	0.905752	0.0153508	0.269203
359__18:2 Linoleic Acid	91494.4	147028	170700	213104	90918	261754	247833	159355	218865	200772	84187.5	325406	85349.2	380697	157216	74626.8	123930	168643	197803	161547	0.0352426	0.362434	0.93513	0.869957	0.0318121	0.376381
360__18:3 a-Linolenic Acid(n3)	7284.55	15040.8	15462.1	21378.9	5300.53	21795.3	31899.1	14217.9	17713.5	24082.8	5730.85	44014.8	6235.3	40810.8	14104.9	5029.12	9346.44	13252.8	11230.1	12176	0.0635879	0.327566	0.435355	0.979426	0.0079154	0.229392
361__18:3 g-Linolenic Acid(n6)	9536.98	18978.3	20014.9	20810.4	6468.94	29446.9	21841.1	19310.3	24691.6	13952.3	7221.21	15139	5431.87	18555.8	16640.6	3511.96	10005.6	12723.7	15412.3	9978.25	0.128841	0.536786	0.21308	0.0367646	0.0077137	0.509818
362__18:4 Stearidonic Acid	0	0	0	0	0	0	0	0	0	0	0	817.432	0	0	652.681	0	0	378.487	0	0	No info.	0.181364	0.373901	0.181364	0.373901	0.300063
363__20:3 DGLA(n6)	9915.42	15599.2	9151	12109.8	10512.4	15903.9	8255.51	9951.45	10708.9	7927.82	9295.58	14727.8	7170.3	13424.9	13169.7	7065.05	8829.56	16245	15627.2	15402.7	0.634047	0.95762	0.61539	0.631323	0.412624	0.666346
364__20:3 Mead Acid(n9)	1081.65	1531.78	1181.52	1362.17	1222.6	878.78	509.507	440.397	462.992	383.5	612.001	895.139	600.257	1059.55	891.678	392.713	428.18	628.027	682.289	686.924	0.0002377	0.0044745	0.0001057	0.0586567	0.799421	0.0534627
365__20:4 ETA(n3)	232.962	373.996	598.728	343.943	266.179	458.202	450.466	428.433	603.467	641.089	416.821	1254.21	450.432	2080.26	712.782	97.259	173.819	352.25	401.357	541.966	0.0843773	0.118586	0.63981	0.210877	0.0566232	0.0985851
366__20:4 Arachidonic Acid(n6)	233293	370011	250223	305358	254776	1.06813e+06	687620	669333	965330	591257	166158	216622	126132	245918	240490	75520.8	103374	209297	202134	205641	0.0040223	0.0389866	0.0118418	0.0022615	0.0014883	0.311563
367__20:5 EPA	4105.34	8204.99	6294.43	7618.14	3672.12	5526.16	3799.69	3122.37	3889.56	2498.81	89719.5	214827	74979.9	266432	156781	13793.4	16916	36698	27611.2	28075.5	0.0665255	0.0131842	0.0095479	0.0125768	0.0069556	0.0197452
368__22:4 Adrenic Acid	6228.5	8398.2	7677.75	8693.95	8638.06	58530.5	37599.2	47765.3	50752.2	38014	1910.03	3137.43	1767.17	3412.55	3207.53	1373.11	1877.29	2844.91	3280.72	2657.22	0.0005652	1.79e-05	1.16e-05	0.000358	0.0003499	0.583606
369__22:5 DPA(n3)	6695.32	10609.8	9172.45	11482.6	8171.63	13050.8	8951.82	9728.07	11823.9	7448.02	60215.4	97162.1	52578	106918	92041.5	6700.71	8959.57	17026.5	14509.7	14202.2	0.480353	0.0023905	0.183306	0.002484	0.364314	0.002483
370__22:5 Osbond Acid(n6)	933.591	1252.3	1214.91	1185.97	1361.93	9647.32	6460.85	5749.91	7121.54	4604.59	72.3466	416.679	131.194	468.638	303.316	116.05	131.769	244.018	215.789	208.43	0.0027005	2.39e-05	9e-07	0.0014993	0.0014851	0.275897
371__22:6 DHA	35558.7	54786.8	48019.8	61804.5	45595.4	83639	65578.8	62021.3	87956.6	61395.2	44181.7	109089	46615.3	145092	83942.6	127265	166236	267665	221298	282302	0.012723	0.128788	0.0047076	0.525967	0.007884	0.0068145

## Sheet: Small intestine pg_100mg
Sample Name	Control_SI_No.1	Control_SI_No.2	Control_SI_No.3	Control_SI_No.4	Control_SI_No.5	AA_SI_No.16	AA_SI_No.17	AA_SI_No.18	AA_SI_No.19	AA_SI_No.20	EPA_SI_No.6	EPA_SI_No.7	EPA_SI_No.8	EPA_SI_No.9	EPA_SI_No.10	DHA_SI_No.11	DHA_SI_No.12	DHA_SI_No.13	DHA_SI_No.14	DHA_SI_No.15	Q-values (Control vs ARA)	Q-values (Control vs EPA)	Q-values (Control vs DHA)	Q-values (ARA vs EPA)	Q-values (ARA vs DHA)	Q-values (EPA vs DHA)
001__PGE2	12053.2	14734.7	6477.14	17526.6	9028.67	20455.6	32917.1	11482.9	39426.2	18127	3940.12	6155.48	2577.66	5891.58	4120.15	2960.26	5286.33	2291.79	4518.15	1406.89	0.051235	0.0072086	0.0032273	0.0167712	0.0135593	0.237182
002__PGD2	11326.2	10488.7	15616	38499.8	10841.3	22587.5	43600.6	22312.3	40130.4	23389.8	1938.78	4474.44	1986.37	7251.56	8448.72	5260.74	11067.3	4282.94	12032.2	1806.49	0.105149	0.0787489	0.104918	0.0042402	0.0017666	0.412588
004__15-keto-PGE2	555.568	704.942	1044.53	4584.28	137.191	734.608	6249.82	835.169	2088.18	1391.75	114.613	1127.44	77.0965	697.073	460.369	194.518	436.853	266.864	1010.89	71.567	0.53125	0.329125	0.28338	0.16158	0.143856	0.707803
007__15-deoxy-PGJ2	338.49	96.9759	179.488	562.335	239.442	674.236	1002.13	772.532	866.865	686.069	0	139.831	161.969	161.602	172.486	52.9289	242.951	89.2136	162.332	47.7089	0.0008968	0.10811	0.0997554	1.04e-05	1.22e-05	0.87246
008__PGF2a	3039.47	3254.97	2296.55	4678.97	2988.19	4825.59	7015.3	4674.87	6337.79	4203.53	1829.46	1403.54	869.189	1468.36	1557.01	1209.35	2036.96	1522.21	1835.02	665.909	0.0117227	0.0025098	0.0045002	0.0011148	0.0001503	0.924028
009__6-keto-PGF1a	43553.9	37543.5	41282.6	61860.2	38121.7	54711.3	108038	62708	47383.1	52950.9	21504.8	17514.5	13520.2	17586	23669.7	16888	31092	20148.2	27999	12814.7	0.119695	0.0006941	0.0037946	0.012679	0.0142958	0.452528
011__TXB2	641.756	1037.56	1633.46	3267.38	1064.9	1102.98	2792.79	2446.56	1175.28	1934.52	201.111	245.346	122.728	666.826	1467.59	478.451	559.871	205.889	1131.62	98.6704	0.544826	0.0969642	0.0707399	0.0121996	0.0063997	0.885583
012__12-HHTrE	23512.6	16946.2	5821.18	15187	11741.8	10417.7	11115	4939.56	21469.7	6977.91	2469.89	4291.38	3893.12	3447.37	4243.37	2907.38	5252.05	1599.68	5140.54	2064.33	0.396464	0.0193139	0.0161705	0.0619465	0.0544972	0.749603
028__5-HETE	3289.65	969.645	769.205	1139.72	1737.52	4363.71	4810.77	4128.64	4677.61	4237.67	403.584	1109.24	744.123	1128.82	602.761	761.785	1262.28	429.926	1000.02	673.209	0.0023307	0.165181	0.177787	1e-07	1e-07	0.893644
030__5,6-DHT	25.7182	53.1622	25.163	67.8011	38.8289	526.583	582.744	487.777	786.199	432.695	10.8351	32.3454	15.1256	62.8362	24.8581	37.4816	53.6445	15.6293	59.5783	19.0868	0.0009046	0.325097	0.68662	0.000795	0.0008537	0.55406
031__8-HETE	1705.86	1025.94	0	1650.94	732.15	2241.59	2213.25	580.446	2640.32	1341.46	202.794	604.212	0	334.094	266.521	257.641	274.784	178.764	828.578	349.404	0.148368	0.0774967	0.0912544	0.0130001	0.0159014	0.54366
032__9-HETE	733.922	427.82	212.158	448.929	283.67	1115.88	1324.71	559.974	1765.32	722.583	70.5803	125.168	249.85	140.763	94.4912	129.139	214.232	118.89	330.648	229.246	0.0199181	0.0169986	0.0571758	0.0105098	0.0132739	0.204085
033__8,9-EET	5571.74	4981.97	0	0	0	3439.94	4351.15	2871.29	6348.29	5022.12	0	0	0	0	0	0	0	0	0	0	0.147637	0.178695	0.178695	0.0019486	0.0019486	No info.
034__8,9-DHT	75.474	179.635	76.2011	218.035	130.882	275.168	601.95	410.912	345.823	266.341	33.4702	51.1711	45.3225	141.796	29.3423	53.5943	70.078	76.0845	53.6339	0	0.0068481	0.0622782	0.0257073	0.001139	0.004896	0.709696
035__11-HETE	18041.6	6451.27	5620.93	12895.4	6937.68	13433.8	14948.8	7850.15	17550.5	8458.36	1804.47	3707.49	2478.15	3358.36	3122.16	3837.47	5872.49	2489.67	6558.28	2803.06	0.441609	0.0403849	0.0546964	0.0062751	0.0040676	0.146944
036__12-HETE	25978.9	14232.7	6733.69	39552.4	15771.3	41507.8	36244.8	16816.7	40417.4	24018.1	3223.66	6254.07	4031.11	5497.57	4430.18	4668.22	6438.25	1649.35	9672.26	3783.15	0.167481	0.0495615	0.0535554	0.0048357	0.0041755	0.712302
037__11,12-EET	13409.4	6695.17	1387.65	2274.78	1139.51	5771.97	6391.26	2985.1	7708.77	6302.41	344.274	748.62	2486.33	1339.69	833.801	965.303	1453.48	723.912	550.34	863.346	0.738534	0.176945	0.156241	0.0006276	0.0027027	0.56607
038__11,12-DHT	115.423	230.292	133.555	257.846	144.313	296.731	787.503	599.99	535.395	278.404	50.4649	62.3024	82.6598	171.698	65.8918	124.781	75.1331	74.412	54.6464	25.1108	0.0254145	0.0368467	0.0121821	0.0111635	0.010282	0.578628
039__15-HETE	11174.7	4419.72	2954.86	11130.3	4704.57	11595.4	7845.28	5169.91	14546.7	6994.38	1009.17	2444.46	1391.45	2308.67	1648.08	2207.49	4814.11	1328.73	3404.22	1075.46	0.364715	0.043679	0.053166	0.0107961	0.0065524	0.311423
040__14,15-EET	28381.3	19833.3	4883.77	5868.7	2960	18876.2	15848.6	10547	26402.4	23687.7	1313.83	1903.33	6824.55	2766.56	2801.13	3528.43	3721.57	2045.93	2683.85	3602.59	0.276948	0.137721	0.137089	0.0006743	0.0045042	0.995901
041__14,15-DHT	241.218	540.728	274.179	407.253	302.131	2591.28	1394.95	1243.74	3801.33	1149.68	77.0581	110.792	201.16	270.81	121.006	225.211	172.366	120.701	88.809	65.8782	0.0298809	0.0161823	0.0076016	0.0212084	0.0204944	0.647952
042__16-HETE	83.1962	42.3067	34.9239	35.6888	40.1787	61.0221	122.869	59.5766	155.385	82.0182	0	0	25.3754	24.7809	20.2854	0	23.461	23.0064	36.85	31.4868	0.0464919	0.0152625	0.0592252	0.0094909	0.005953	0.331001
044__17-HETE	62.1214	0	0	0	47.2974	58.0774	26.5761	65.2317	46.3839	44.6796	0	0	0	23.454	0	0	0	0	0	0	0.120087	0.266401	0.182992	0.0006674	0.0018698	0.373901
046__18-HETE	120.045	53.2447	42.3178	89.1982	62.3773	148.579	166.716	101.47	124.032	130.417	19.5666	69.1002	101.931	58.8692	23.5118	71.4253	38.1247	44.7203	47.5052	32.7704	0.0092695	0.389638	0.125274	0.0029054	0.0001433	0.656661
048__19-HETE	0	0	0	0	0	0	0	0	0	0	0	0	0	0	0	0	0	0	0	47.7513	No info.	No info.	0.373901	No info.	0.373901	0.373901
050__20-HETE	593.888	207.745	105.366	396.167	269.905	368.359	1102.2	519.025	833.988	932.445	32.3422	137.757	201.929	123.588	92.0128	137.958	139.267	139.688	146.312	0	0.0251787	0.0569903	0.0525523	0.0082277	0.0079712	0.904971
051__5-oxo-ETE	331.437	195.53	94.4521	249.683	124.76	465.153	429.746	337.735	679.329	455.834	31.9405	107.414	91.5735	85.2737	60.8203	83.7173	110.891	41.4059	116.148	80.1818	0.0046281	0.0417661	0.0557245	0.0015615	0.0017442	0.571651
053__12-oxo-ETE	0	312.839	0	234.598	0	176.923	142.367	151.008	427.842	246.636	0	0	0	0	0	0	0	0	0	0	0.203866	0.183572	0.183572	0.0124366	0.0124366	No info.
054__15-oxo-ETE	401.995	158.95	81.8206	383.115	138.873	274.891	423.363	214.086	573.232	421.682	26.2228	164.862	119.131	74.8401	81.501	52.2374	113.874	49.9251	72.8316	44.9515	0.143639	0.0825178	0.0656627	0.0026569	0.0066177	0.344952
065__PGE3	434.167	307.012	191.255	625.525	257.387	301.863	617.692	356.699	446.815	412.336	4290.99	6661.86	3086.21	7673.12	3587.08	1964.4	1424	916.554	2226.72	141.447	0.513507	0.0061588	0.0589823	0.0065596	0.0717112	0.004967
066__PGD3	1772.12	928.737	1161.71	4148.49	798.568	0	0	0	0	0	4926.7	21645.7	7013.77	29689.6	14701.2	7853.04	12980	2626.08	9884.49	37.3528	0.046697	0.0389786	0.106332	0.0275546	0.0477044	0.123026
069__PGF3a	0	0	0	0	0	0	0	0	0	0	462.05	281.423	303.024	527.206	276.368	253.468	205.4	97.978	199.659	73.3178	No info.	0.0020762	0.008423	0.0020762	0.008423	0.0113427
070__6-keto-PGF1a-17delta	228.432	239.769	116.037	279.804	186.33	136.822	383.792	169.637	9.40572	0	1853.88	1619.95	1193.69	1892.4	2147.88	515.372	693.35	330.485	617.77	177.789	0.376963	0.0005377	0.0508826	1.64e-05	0.0237041	0.000132
071__TXB3	0	0	0	0	0	0	0	0	0	0	61.8835	177.935	53.3367	429.185	425.836	156.509	81.4202	8.68315	138.585	0	No info.	0.051766	0.0749301	0.051766	0.0749301	0.127343
083__5-HEPE	86.7386	71.9319	52.8886	85.3219	57.0279	47.3754	110.462	55.6039	74.7484	64.7077	2740.46	4765.18	1807.71	4544.9	1861.81	770.54	2041.89	384.589	861.925	647.854	0.987967	0.0086165	0.0384669	0.0086097	0.0384031	0.0137537
086__8-HEPE	48.7311	26.4326	0	0	18.4794	20.1881	26.8504	12.3958	0	0	356.094	618.888	289.482	347.996	352.407	110.887	82.6948	51.9351	118.184	86.8992	0.535779	0.0025927	0.0013361	0.0026198	0.000298	0.0054881
087__9-HEPE	0	0	31.5856	0	33.0404	0	0	0	0	0	424.557	463.944	144.483	282.682	202.123	39.1918	0	0	0	0	0.177952	0.0088411	0.660133	0.0079771	0.373901	0.0083164
088__9-HEPE	0	0	0	0	0	0	0	0	0	0	246.725	437.849	681.155	154.978	0	176.015	137.3	0	0	0	No info.	0.0613667	0.182126	0.0613667	0.182126	0.0876594
089__8,9-EpETE	364.64	163.122	15.7461	81.3307	27.2156	26.6305	46.7535	22.3194	16.2848	48.489	948.221	1521.79	4077.12	1609.62	1377.45	422.494	545.642	223.835	324.984	262.688	0.200236	0.0322114	0.0312757	0.0277303	0.0048254	0.0484928
091__11-HEPE	519.037	292.487	161.466	583.01	263.894	223.271	315.967	97.2599	145.892	71.6254	2551.28	4042.47	2975.16	5209.47	3230.33	1068.61	3432.89	1039.64	2838.34	470.62	0.0680135	0.0019926	0.0703484	0.0017735	0.0495993	0.0389435
093__12-HEPE	1269.49	771.159	246.802	1562.59	713.633	535.118	710.366	216.973	493.616	293.113	6974.03	12051.7	6394.83	9400.13	6242.07	2946.41	3506.71	1030.77	4951.54	1702.52	0.0964529	0.0022926	0.029781	0.0021624	0.0253226	0.0033958
095__11,12-EpETE	338.213	212.956	47.1901	66.2268	16.8241	22.1841	63.0101	13.4177	29.657	32.9337	1347.4	2379.87	5819.23	1142.52	1656.04	432.973	532.303	243.691	302.87	424.26	0.162305	0.0538077	0.0133645	0.0477185	0.0019533	0.0733613
097__15-HEPE	1521.61	760.33	442.704	2082.64	880.633	804.954	1019.81	333.405	613.201	494.762	11309.6	17639.8	13257.4	16161.4	10366.6	4060.22	5184.99	2260.16	6316.6	2823.59	0.165831	0.0005946	0.0057508	0.0006674	0.0088566	0.000289
099__14,15-EpETE	828.854	459.099	132.542	174.916	74.4339	57.4944	191.023	37.3058	77.6416	141.22	3659.71	5491.16	15114.9	4167.31	5014.18	1724.64	1657.46	831.367	934.291	1186.54	0.173527	0.0404254	0.0036986	0.036473	0.0027634	0.0633609
101__18-HEPE	44.043	19.6377	23.3677	22.7627	12.4228	9.7527	30.7424	7.81134	15.4304	5.84397	397.858	706.732	254.776	419.084	425.457	180.13	196.843	81.0023	194.773	77.7499	0.167183	0.004674	0.0102876	0.0042904	0.00781	0.0055493
103__17,18-EpETE	1123.19	491.942	174.369	231.551	74.4642	60.2193	293.773	52.8138	133.45	186.318	5212.42	7238.08	18744.6	6196.44	5620.41	1862.39	2314.93	1165.1	1175.14	970.476	0.224677	0.032711	0.0093135	0.0297602	0.0053806	0.0495772
105__17,18-diHETE	252.612	389.344	221.65	556.056	205.469	295.763	779.38	315.846	471.685	557.545	3035.66	3679.54	2576.14	5154.9	3719.54	2610.18	2044.69	1152.09	1076.94	810.411	0.188123	0.0014084	0.0217676	0.0015515	0.0335554	0.0052879
107__20-HEPE	437.124	178.946	91.9375	171.791	126.737	51.873	67.9067	49.1633	194.174	70.9101	172.754	1470.41	924	1404.74	731.244	653.688	1064.62	586.034	628.356	659.432	0.124921	0.0336699	0.001277	0.0224039	0.0011927	0.405891
158__4-HDoHE	385.873	375.115	97.6829	222.597	147.436	137.845	189.816	63.82	154.887	52.9904	77.6723	285.926	194.467	112.672	128.218	1019.62	823.596	607.96	1308.07	1014	0.085769	0.24893	0.0006094	0.404375	0.0015014	0.0014848
161__7-HDoHE	121.263	137.405	53.8453	62.0982	33.535	81.3236	82.3941	11.3614	91.1536	30.8656	25.4496	157.811	28.3405	91.0662	51.7309	611.373	481.394	350.87	1238.12	611.015	0.413961	0.744805	0.0188297	0.707318	0.0168021	0.0174123
162__8-HDoHE	367.328	264.951	121.771	109.965	161.105	258.795	175.498	62.5922	164.884	117.409	156.416	208.27	218.151	235.786	114.695	1638.98	924.477	756.632	1661.2	1544.02	0.426877	0.741489	0.0036151	0.457596	0.0034899	0.0041225
165__10-HDoHE	208.05	101.242	37.7784	128.253	110.768	123.338	91.8908	57.5298	99.1555	45.3375	79.6898	117.89	139.058	94.1465	84.2375	398.829	532.551	275.388	562.448	516.485	0.305301	0.643498	0.0004668	0.310677	0.0015113	0.0021373
166__11-HDoHE	230.434	90.8669	36.3654	40.0283	45.0747	49.1166	51.0338	23.9106	68.6802	55.4917	34.8824	116.43	92.421	75.0618	72.9531	455.863	472.307	320.414	784.399	738.642	0.35443	0.801037	0.0012866	0.0961976	0.0046186	0.0053932
170__13-HDoHE	1418.54	774.753	463.687	1558.38	747.127	732.068	944.281	289.96	1378.81	193.454	176.67	713.835	533.551	568.839	459.851	2605.11	3444.58	1341.37	4510.42	1135.85	0.374628	0.0594965	0.0424964	0.382193	0.0222785	0.0283797
171__14-HDoHE	7276.12	6664.8	1959.35	11482.8	5655.8	6051.4	4262.7	2053.72	5161.67	2274.45	3148.02	5396.29	2648.73	3798.64	3360.15	10754.4	21954.5	5887.06	22022.3	10275.7	0.162212	0.128723	0.0708749	0.7594	0.0343724	0.0325639
175__16-HDoHE	483.759	231.952	88.7567	246.617	127.785	145.471	147.017	102.211	239.791	113.087	81.3682	240.814	192.552	164.299	182.12	892.125	974.894	314.208	1195.18	1025.66	0.271414	0.413278	0.0045059	0.540656	0.007548	0.0083741
176__17-HDoHE	6562.47	3532.13	1424.73	8569.6	3432.17	4326.72	3646.62	1578.28	4515.56	2334.94	1083.76	4670.81	3266.2	3491.81	2272.86	7286.67	13610	3232.71	13453.2	7421.52	0.335923	0.248644	0.106848	0.707661	0.0433862	0.0362646
178__16,17-EpDPE	4179.63	3734.53	648.914	982.731	625.134	1070.35	893.001	528.189	1959.81	1114.39	657.159	1185.25	4155.5	1165.14	1185.61	7503.9	6881.22	3644.46	4822.56	9496.94	0.318014	0.727747	0.0090605	0.431683	0.0053932	0.0040365
180__20-HDoHE	599.478	404.059	105.877	414.438	153.61	233.703	250.531	128.464	361.502	149.551	107.349	367.253	257.055	261.461	216.446	1202.91	1147.09	575.414	1806.13	1877.02	0.301194	0.378462	0.0048639	0.778271	0.00932	0.0098512
181__19,20-EpDPE	10083.7	8461.73	1346.95	2108.46	1059.32	2322.58	2122.02	879.56	3290.26	2456.33	1370.1	2622.89	7913.04	2770.87	2214.85	15800.8	14608.3	8774.78	11060.1	16215.5	0.284969	0.598359	0.0069829	0.368958	0.001044	0.0006916
182__19,20-diHDoPE	155.467	177.715	169.434	270.095	165.243	115.688	222.6	125.066	164.95	133.674	82.0642	265.572	206.962	361.167	187.184	1262.4	773.584	669.365	825.276	424.935	0.252591	0.531938	0.0107935	0.208945	0.0088943	0.0041669
183__21-HDoHE	225.689	160.427	65.5728	146.903	41.6258	70.8784	129.28	54.426	0	0	40.5498	234.604	146.492	83.6186	123.369	553.983	684.458	718.147	479.799	1031.32	0.0985089	0.961657	0.0004966	0.103024	0.0017972	0.0004757
184__22-HDoHE	538.538	180.63	54.598	138.314	71.9653	77.4533	139.81	67.5122	99.3283	95.9389	69.715	262.499	269.64	185.641	120.996	996.311	1272.43	623.125	541.844	725.62	0.319697	0.879619	0.0042229	0.093101	0.0052053	0.0065981
195__7,17-diHDoHE	11.4932	91.1863	6.71616	99.9701	19.2378	27.7668	15.0675	10.2249	23.6835	33.3299	19.0167	12.406	19.5219	19.9653	5.72516	230.478	34.7555	46.6641	13.9843	27.6944	0.315971	0.213246	0.595426	0.219756	0.294256	0.241491
196__10,17-diHDoHE	37.9003	155.07	40.0197	221.363	68.3697	95.4921	80.2794	75.7219	101.538	61.4697	77.5941	54.7547	51.6552	150.892	95.8255	472.189	312.647	157	288.825	90.0996	0.586198	0.660909	0.0675713	0.871604	0.0518785	0.0530782
262__9-HODE	20085	9784.52	2081.11	6905.24	7106.71	4326.22	3664.6	1799.02	7528	1983.69	1676.27	3653.04	2111.37	2544.32	1826.85	5442.42	4200.64	1849.66	6650.49	5175.46	0.130766	0.0842614	0.209013	0.20865	0.557295	0.0308009
263__9,10-EpOME	30116.9	23078.7	2688.97	4898.27	4016.94	3961.63	6135.57	2337.87	9576.27	5331.58	2598.68	6433.24	9020.85	4339.48	3661.44	9256.3	6955.53	5736.15	7148.77	11352	0.261831	0.247678	0.443939	0.88072	0.132966	0.0933309
264__9,10-diHOME	592.71	2806.41	719.334	773.309	1522.12	653.165	612.105	581.857	1173.72	384.801	1050.06	465.99	356.599	408.149	723.927	2193.36	1566.62	678.858	771.277	1013.05	0.227181	0.179651	0.941261	0.674659	0.108577	0.0722017
265__13-HODE	20537.4	17676	5342.45	15443.4	8559.59	5253.43	8250.47	3509.24	12292.3	4017.17	3279.31	6208.19	4920.37	4870.92	3471.17	9316.04	8079.78	3661.13	14464.9	6607.45	0.0701061	0.0331151	0.167978	0.25291	0.486399	0.0948523
266__12,13-EpOME	67008.9	37392.4	5097.71	9646.07	11245.1	9628.74	10213.4	4925.27	15983.1	7818.01	4195.35	14010.5	19107.7	6904.49	6545.29	18800.6	14056.6	9557.38	11349.9	23666.4	0.235716	0.249017	0.422091	0.898029	0.104114	0.196328
269__9-oxo-ODE	44631.8	28186.8	4126.05	8697.73	12783.1	7736.59	7363.77	3681.24	12796.8	2919.53	5099.1	16442.5	4325.36	2849.08	7277.33	9092.81	10084.2	6258.52	13037.1	30215	0.162264	0.148855	0.507194	0.922808	0.176154	0.218651
270__13-oxo-ODE	17.8138	7.48878	4.12107	1.75525	1.44569	5.70722	9.96768	1.1896	1.63227	2.08581	0.632572	3.84119	479.696	3.92596	2.81793	12.3199	4.03867	3.53607	4.40459	28.1885	0.505141	0.391098	0.497925	0.37989	0.237351	0.410233
272__9-HOTrE(n3)	1825.52	422.62	78.2782	96.2229	356.617	201.157	93.8822	102.282	322.126	53.1306	116.374	151.729	80.8369	26.1086	106.418	148.909	100.521	42.0077	142.57	398.898	0.285995	0.230156	0.300038	0.301979	0.880906	0.308327
275__13-HOTrE(n3)	1426.14	1098.77	267.929	1049.36	724.268	696.995	527.029	237.913	1341.53	346.167	206.077	347.608	204.954	250.931	200.075	500.776	428.573	146.403	684.302	400.656	0.334649	0.0258439	0.0550396	0.116567	0.380085	0.0936619
281__9-oxo-OTrE(n3)	1055.03	491.759	41.9821	75.6699	244.912	182.515	62.664	64.5384	227.038	12.7634	120.737	113.87	71.2061	28.9633	98.8159	221.098	76.8563	65.4903	94.8499	636.898	0.220721	0.188371	0.471152	0.610784	0.372153	0.290293
290__13-HOTrE(n6)	1780.49	492.378	637.202	1550.86	1100.54	429.478	869.699	421.315	865.851	588.846	317.512	569.641	1219.3	635.458	366.572	566.43	103.983	691.515	1394.57	354.038	0.113974	0.137405	0.177137	0.945516	0.958196	0.998824
303__PGE1	2327.87	1700.97	1314.86	4045.89	1720.58	1929.45	3831.86	1870.22	2855.24	1756.34	383.935	766.608	352.091	1134.52	896.677	871.106	1535.19	644.307	1623.81	228.138	0.726892	0.0323267	0.0546735	0.0034508	0.0153547	0.396215
304__PGD1	2038.19	1979.46	1299.57	4304.24	1642.67	1937.14	3601.64	1774.63	2864.62	1954.3	434.38	745.39	471.648	1169.83	946.713	947.967	1407.45	664.66	1563.86	222.487	0.791512	0.0452205	0.0577233	0.0021977	0.0089985	0.482149
306__TXB1	0	0	0	0	0	0	0	0	0	0	0	0	0	0	372.967	0	0	0	0	0	No info.	0.373901	No info.	0.373901	No info.	0.373901
314__15-HETrE(n6)	2959.9	1235.72	660.261	2604.86	727.885	956.536	1302.39	472.999	1016.4	638.578	221.767	578.168	375.121	529.565	435.972	575.029	1103.03	416.491	1231.97	305.319	0.19409	0.0652012	0.115264	0.0222462	0.541302	0.167475
318__LTB3	0	0	0	0	0	0	0	0	0	0	0	0	0	0	0	0	0	5.50301	0	0	No info.	No info.	0.373901	No info.	0.373901	0.373901
319__5-HETrE(n9)	91.3448	20.941	25.4493	28.0826	31.2516	15.2783	17.6823	12.6152	8.83	9.37896	11.1443	24.877	16.611	15.9343	19.3186	13.096	23.0414	12.1514	17.3121	11.4426	0.111314	0.171575	0.140994	0.125527	0.362832	0.506972
355__16:0 Palmitic Acid	2.00103e+06	2.85827e+06	780980	1.51936e+06	1.13504e+06	1.3013e+06	2.23623e+06	1.17363e+06	1.5627e+06	1.30956e+06	1.11799e+06	2.11724e+06	909081	1.13424e+06	1.42297e+06	1.37885e+06	1.25319e+06	1.81524e+06	1.46495e+06	1.07517e+06	0.737018	0.468633	0.513444	0.552085	0.613795	0.820743
356__16:1 Palmitoleic Acid	200298	389975	38370.7	135942	56019.9	71746.4	208367	30526.7	71789.2	30339.7	47472.1	91357.6	36466.2	56321.9	64159.8	49204.5	52399.1	159348	75459.5	44140	0.286646	0.174266	0.225563	0.525057	0.873509	0.489509
357__18:0 Stearic Acid	562861	651260	351973	572487	445967	504918	739832	535506	601702	646134	393551	819922	396608	454019	549727	463007	494736	506262	491468	397350	0.223089	0.952539	0.433583	0.382914	0.0189454	0.554869
358__18:1 Oleic Acid(n9)	462418	669402	167757	362137	246054	262889	474396	217872	324474	227906	207670	385190	178257	217192	244419	272051	227516	356031	283917	215622	0.44454	0.192625	0.283451	0.381938	0.582666	0.59268
359__18:2 Linoleic Acid	1.32352e+06	2.30076e+06	625583	1.22521e+06	947861	879180	1.53557e+06	872526	1.27981e+06	951916	790288	1.41956e+06	661121	907259	969834	1.33061e+06	1.0423e+06	1.21553e+06	1.22028e+06	855124	0.576589	0.310796	0.628533	0.426026	0.856815	0.266663
360__18:3 a-Linolenic Acid(n3)	441955	876202	91174.8	231096	211450	208454	534289	203348	487943	169664	175550	551956	136023	160631	205782	307368	169147	321373	272083	218568	0.763055	0.455504	0.466838	0.516253	0.471083	0.890367
361__18:3 g-Linolenic Acid(n6)	857310	1.68129e+06	239518	547642	448301	438120	1.00659e+06	414209	981970	355670	400300	1.05929e+06	325717	332738	445234	712049	429466	618141	604752	477609	0.701939	0.424285	0.505893	0.545987	0.657979	0.715345
362__18:4 Stearidonic Acid	945.569	1982.68	241.144	370.119	157.584	309.784	671.935	194.827	494.256	472.619	995.237	3346.14	931.678	1348.04	1252.94	537.478	681.146	868.239	517.365	282.003	0.419522	0.176581	0.667057	0.0623497	0.275382	0.0901031
363__20:3 DGLA(n6)	196119	404733	86981.7	184475	105402	68442.7	135075	57152.9	103597	93027	63155.1	184650	72699.2	137873	91754.7	105309	121513	122234	121496	76643.9	0.140219	0.197561	0.203208	0.503114	0.301736	0.981326
364__20:3 Mead Acid(n9)	27499.7	30412.2	13864.4	20587.7	10162.6	6278.44	8786.34	4226.58	5909.85	8725.69	7609.21	10474.1	4035.42	10610.7	8644.24	6586.92	6332.25	4877.93	4850.05	2596.81	0.0219581	0.0310967	0.0149773	0.345676	0.162137	0.0495384
365__20:4 ETA(n3)	8510.29	8680.98	3388.85	4807.02	3113.58	2994.43	6740.84	2067.6	4360.87	3528.14	9268.52	29547.3	8068.95	9684.99	11783.4	2875.2	3114.3	3872.53	3091.54	2786.55	0.259803	0.119148	0.103711	0.0714507	0.382391	0.0586293
366__20:4 Arachidonic Acid(n6)	2.23018e+06	4.08164e+06	1.4998e+06	2.4951e+06	1.63014e+06	3.62474e+06	5.24853e+06	3.56082e+06	5.36198e+06	4.65687e+06	873505	1.60137e+06	945238	1.55478e+06	1.35611e+06	988227	1.12782e+06	1.019e+06	1.14541e+06	660551	0.0081411	0.0500232	0.0374998	5.34e-05	0.0005691	0.151097
367__20:5 EPA	87495.7	175190	52527.4	83376.4	48656.7	29624.8	124734	39609.8	50114.2	66839.5	1.56693e+06	2.7087e+06	1.06682e+06	1.66843e+06	1.63873e+06	571398	489447	451297	455436	262841	0.364276	0.0034877	0.0002045	0.0033317	9.28e-05	0.0078182
368__22:4 Adrenic Acid	54314.2	99086.1	29671.8	47362.8	38245.8	98204	153254	92589.2	149228	137949	9684.62	20524.1	9876.54	15888.9	12486	6669.79	7655.22	7921.77	9151.92	5488.95	0.0033991	0.0283889	0.0183779	0.0007912	0.0007513	0.0339188
369__22:5 DPA(n3)	35448.1	64598.3	23809.3	36457.6	25874.3	25010.4	35645	24479.8	33908.6	33965.6	190408	388103	174880	244598	243583	35394.8	45624.2	42489.5	41904.4	27483.2	0.412477	0.0042855	0.870523	0.0043574	0.0834469	0.0049289
370__22:5 Osbond Acid(n6)	16262.8	33542.1	7460.81	10904.9	10107.1	31162.3	55749.9	27721.5	54811	36436.3	1775.02	2862.41	1924.18	2058.76	1801.88	1013.01	1535.11	1715.35	2019.5	1122.12	0.0096984	0.0444536	0.0391242	0.0027176	0.0025688	0.0588684
371__22:6 DHA	552604	1.27072e+06	307361	489159	399838	424428	634657	364513	688872	498882	516086	1.01656e+06	452614	655846	582189	1.3839e+06	1.43441e+06	1.43192e+06	1.51438e+06	965107	0.66623	0.84235	0.0055674	0.323912	9.71e-05	0.0009903

## Sheet: Muscle pg_100mg
Sample Name	Muscle_Control_1	Muscle_Control_2	Muscle_Control_3	Muscle_Control_4	Muscle_Control_5	Muscle_AA_16	Muscle_AA_17	Muscle_AA_18	Muscle_AA_19	Muscle_EPA_6	Muscle_EPA_7	Muscle_EPA_8	Muscle_EPA_9	Muscle_EPA_10	Muscle_DHA_11	Muscle_DHA_12	Muscle_DHA_13	Muscle_DHA_14	Muscle_DHA_15	Q-values (Control vs ARA)	Q-values (Control vs EPA)	Q-values (Control vs DHA)	Q-values (ARA vs EPA)	Q-values (ARA vs DHA)	Q-values (EPA vs DHA)
001__PGE2	121.081	30.5223	21.5103	12.2987	41.1502	421.84	185.933	90.4538	283.926	21.5952	12.6387	30.3054	43.4459	20.3695	6.95537	18.3759	43.7172	6.85628	13.1674	0.0617155	0.380084	0.220552	0.0526579	0.0480294	0.388216
002__PGD2	154.084	18.2662	17.4384	61.4791	39.1752	482.225	156.195	100.198	160.1	27.0893	9.88999	17.6195	21.4441	23.1567	25.4514	18.7978	28.4845	10.9341	23.7031	0.0804466	0.206039	0.222518	0.0996564	0.101367	0.709461
004__15-keto-PGE2	0	0	0	0	0	69.8978	64.3469	61.452	62.2159	0	0	27.8574	33.2426	0	0	26.0925	27.091	0	0	5.69e-05	0.180011	0.177908	0.0016437	0.0001924	0.877621
008__PGF2a	25.5265	17.4479	11.1498	17.9423	36.1926	185.82	124.208	82.7462	66.6391	18.1476	17.2204	7.39953	13.465	9.88082	3.66925	7.81111	10.8182	0	0	0.0375071	0.114676	0.0071479	0.0310866	0.0249602	0.0186526
009__6-keto-PGF1a	440.687	129.91	76.2261	209.687	299.781	2202.04	1111.52	646.695	1216.24	129.675	104.087	155.965	130.538	153.665	32.1757	100.167	103.31	40.1994	72.2852	0.0447944	0.210425	0.0651704	0.0381449	0.0330857	0.0058674
011__TXB2	102.426	86.2657	25.0124	59.2435	71.7502	772.71	194.862	177.021	330.372	0	91.5998	58.2871	30.9281	42.8263	0	45.9128	0	0	44.8779	0.119328	0.261391	0.0184258	0.101209	0.0854764	0.194708
012__12-HHTrE	109.323	84.66	27.3226	26.4478	78.2162	340.88	140.523	121.386	109.431	37.5227	20.2177	47.1323	50.1027	16.6031	11.2656	30.5961	27.6928	18.5789	35.8434	0.0645767	0.121785	0.0689275	0.0772069	0.0671237	0.275313
028__5-HETE	58.5473	52.5804	32.788	54.5399	68.7666	1218.81	422.704	302.446	366.552	66.6881	43.8672	71.3095	83.1917	23.6997	45.4537	53.908	77.1473	65.3228	48.9036	0.0927339	0.732158	0.585021	0.0942942	0.0945679	0.974756
029__5,6-EET	214.616	175.324	155.474	110.579	169.387	922.063	638.137	489.393	312.363	182.094	102.786	180.793	200.707	93.2815	124.184	127.712	204.261	87.5749	217.378	0.0446047	0.650646	0.680927	0.0404209	0.0400171	0.993319
030__5,6-DHT	7.38682	8.24667	0	7.63208	0	88.5552	97.0234	55.2964	122.139	28.2627	0	0	0	0	4.24721	0	0	0	0	0.0076413	0.871093	0.10564	0.0004428	0.0072224	0.446123
031__8-HETE	93.5841	81.7543	17.5184	33.6639	53.6521	692.435	135.879	89.4639	62.0333	86.1165	25.5313	41.445	50.8147	17.8544	49.0851	61.0841	125.278	27.291	39.9263	0.297133	0.547257	0.844926	0.273483	0.306947	0.46028
032__9-HETE	54.8074	21.1408	21.5411	21.9496	25.6791	621.818	125.204	72.1527	81.9185	48.3142	16.6148	49.7986	0	0	0	60.9322	62.2664	0	0	0.235682	0.64882	0.796346	0.22471	0.227768	0.930129
033__8,9-EET	806.11	767.993	510.209	519.164	692.256	5849.16	3263.62	3887.15	4386.53	687.306	394.208	811.63	902.033	495.836	486.766	799.461	927.442	477.388	867.099	0.0064075	0.993552	0.657665	0.0059129	0.0061592	0.702346
034__8,9-DHT	0	0	0	0	6.76265	45.8403	94.8243	47.5162	75.8424	32.0887	0	10.7165	15.0794	0	10.5255	18.4365	9.77164	0	0	0.0114245	0.160949	0.127412	0.003147	0.0011975	0.593185
035__11-HETE	113.994	49.7059	17.315	32.9103	59.7546	527.105	178.702	102.563	120.987	61.5587	21.8706	44.072	31.2199	13.6175	26.4697	30.8803	54.1957	15.3517	33.5344	0.171924	0.305931	0.235741	0.140773	0.137672	0.827382
036__12-HETE	523.963	618.535	181.212	155.141	757.616	3297.39	579.474	478.993	441.549	125.061	120.266	367.892	229.937	71.6372	95.6411	294.966	169.153	76.4183	152.196	0.363389	0.078507	0.0718311	0.242472	0.233452	0.709131
037__11,12-EET	974.622	1228.94	612.803	845.54	951.557	6147.95	5061.24	4930.93	6044.75	1065.37	414.113	1074.28	1193.38	503.768	718.025	888.563	1313.59	765.855	1416.83	1.2e-06	0.713009	0.592295	2.2e-06	2.3e-06	0.45482
038__11,12-DHT	24.3431	8.19293	8.89762	13.6383	5.88931	33.3237	46.8197	44.5686	41.3657	37.1518	13.1001	12.2454	10.8822	15.0401	10.3613	6.38568	2.22664	7.69825	10.5928	0.0003479	0.380152	0.227663	0.0060627	1.19e-05	0.106274
039__15-HETE	130.429	64.6661	27.9032	48.7521	73.1034	922.839	194.284	133.313	101.368	124.128	17.1182	42.4526	49.092	19.4853	29.5654	22.6157	42.8642	25.6813	46.5099	0.263571	0.495879	0.10782	0.238647	0.217949	0.43864
040__14,15-EET	2237.27	2396.93	1389.33	1412.5	1742.07	17739.1	9184.23	10806.7	9804.15	1782.62	992.914	2083.22	2713.93	1398.37	1582.34	1900.4	2916.48	1656.4	3520	0.0142365	0.911249	0.304466	0.0135628	0.0150448	0.313163
041__14,15-DHT	23.2799	13.8253	14.9657	10.7732	21.5476	107.274	120.728	128.879	208.426	47.1735	20.658	25.3302	26.8027	23.7582	17.5449	33.4018	8.83983	7.54303	14.3203	0.0116052	0.0549241	0.918801	0.0139218	0.0102647	0.0974626
042__16-HETE	0	0	0	0	0	36.9321	28.2309	7.00072	9.73016	0	0	0	0	0	0	0	0	0	0	0.0661838	No info.	No info.	0.0661838	0.0661838	No info.
046__18-HETE	7.36496	9.01571	0	6.01358	0	49.1301	37.2575	27.4846	12.7957	9.23454	0	7.77105	0	0	0	8.83002	0	0	0	0.0347304	0.712428	0.324837	0.0305081	0.027011	0.567235
048__19-HETE	0	0	0	0	0	153.53	71.2847	60.3812	25.426	0	0	0	0	0	0	0	0	0	0	0.0643797	No info.	No info.	0.0643797	0.0643797	No info.
051__5-oxo-ETE	32.0857	34.3316	16.248	36.934	38.2947	185.478	204.757	137.693	73.0709	46.1353	17.1651	45.0161	26.336	15.275	22.7858	20.6698	0	67.3696	33.8932	0.0260236	0.842003	0.828189	0.0233209	0.0038711	0.937594
053__12-oxo-ETE	0	41.2454	13.5626	9.87006	27.6373	146.892	114.571	116.98	52.487	0	0	0	0	14.5227	0	44.5421	18.4344	17.0147	0	0.0023718	0.08055	0.826747	0.0122253	0.0023391	0.169295
054__15-oxo-ETE	13.9722	42.4083	35.6935	33.6167	62.4139	197.177	277.208	190.674	125.634	42.723	30.1598	74.2473	44.4598	16.401	22.7608	35.4936	40.0657	46.3575	54.8733	0.0115044	0.755955	0.815171	0.0011034	0.0133106	0.881846
065__PGE3	9.6666	0	0	0	0	8.9126	0	0	0	39.1748	30.0449	89.114	84.54	27.4613	6.58397	6.26448	15.793	8.03803	7.65055	0.922896	0.0175428	0.029254	0.0176707	0.0493752	0.0281655
071__TXB3	0	0	0	0	0	0	0	0	0	19.4441	44.9322	32.6662	22.2248	19.3809	0	0	0.982401	3.01197	0	No info.	0.0049656	0.243862	0.0049656	0.243862	0.0052266
082__RvE2	0	0	0	0	0	0	0	0	0	0	0	0	32.1623	0	0	0	0	0	0	No info.	0.373901	No info.	0.373901	No info.	0.373901
083__5-HEPE	14.8505	20.649	12.106	14.2895	12.4682	47.4014	17.8311	36.1346	17.1619	473.408	246.222	396.68	469.209	246.816	49.5157	74.8217	91.0397	133.706	77.9832	0.13759	0.0022813	0.0066669	0.0024194	0.0133094	0.0040047
086__8-HEPE	0	0	0	0	0	0	0	0	0	81.4859	20.4256	65.5493	57.0856	29.5428	0	8.78059	0	0	0	No info.	0.010988	0.373901	0.010988	0.373901	0.011662
089__8,9-EpETE	37.2254	0	23.8153	22.845	37.5417	0	26.0394	0	0	1074	347.401	910.909	1181.47	434.795	191.141	140.451	183.559	44.7317	173.909	0.10754	0.0105137	0.008841	0.0097128	0.0053487	0.0180913
091__11-HEPE	14.5453	0	0	4.57013	8.41113	16.5936	0	0	0	100.861	34.6927	64.6794	64.9884	25.5608	24.975	11.6691	32.3381	6.06189	18.6195	0.785522	0.01522	0.040358	0.010175	0.0573177	0.0231421
093__12-HEPE	34.2914	42.7118	53.388	32.4557	158.966	69.2721	149.067	187.715	41.9732	500.007	371.085	664.655	337.168	171.633	42.8195	120.184	239.571	54.4412	83.2243	0.276001	0.011814	0.337364	0.0194055	0.939216	0.0101516
095__11,12-EpETE	36.2038	46.1952	23.1126	30.5345	29.198	53.5982	48.9398	30.6568	28.9642	1138.26	523.502	1148.73	1481.38	690.687	145.159	148.029	192.915	86.3806	164.806	0.323923	0.0050371	0.0022143	0.0051643	0.0012529	0.007665
097__15-HEPE	98.7276	19.5879	28.4419	18.2443	29.3203	289.124	40.1379	32.1192	37.5141	488.763	356.452	382.488	480.872	189.731	41.0867	25.1909	47.2104	32.1253	0	0.411276	0.0023276	0.586861	0.0117404	0.346099	0.0026335
099__14,15-EpETE	138.786	67.2055	66.951	74.6963	57.502	126.622	46.8526	50.9924	62.4035	3177.59	1277.55	2646.17	3084.89	1347.16	356.06	389.922	374.637	167.794	547.992	0.701746	0.0058509	0.0076869	0.005747	0.0040709	0.0089867
101__18-HEPE	0	0	0	0	0	0	0	0	0	55.4591	11.4038	31.2961	47.772	16.2043	8.1606	5.13479	9.31357	3.65554	5.47474	No info.	0.0194473	0.0036248	0.0194473	0.0036248	0.0378278
103__17,18-EpETE	102.863	96.4894	72.3246	89.0883	110.547	86.5704	58.7498	59.8825	93.5495	3301.6	1902.89	4169.32	3028.67	1410.75	373.784	350.343	411.536	192.256	489.2	0.113465	0.005737	0.0049318	0.0055847	0.0035526	0.0081182
158__4-HDoHE	52.7604	96.0081	87.9854	59.9285	166.777	384.642	425.522	279.331	94.9104	326.147	84.9867	154.191	113.515	65.5424	231.591	404.612	402.26	536.816	471.59	0.0658809	0.302214	0.0004133	0.122132	0.233054	0.0054708
161__7-HDoHE	0	0	13.8511	0	30.7098	61.9636	33.6543	24.411	13.9533	61.7316	19.7062	28.9997	43.8336	24.6638	53.9699	67.601	70.589	66.0606	78.5504	0.0674881	0.024891	4.18e-05	0.860048	0.0122956	0.0063464
162__8-HDoHE	33.5558	59.195	37.7328	41.5074	107.642	206.855	204.574	146.354	78.6831	189.091	37.3047	61.2149	72.2045	28.9754	232.035	247.268	280.769	231.214	306.101	0.0121423	0.51396	7.6e-06	0.0951712	0.015077	0.000509
165__10-HDoHE	13.6213	7.99675	8.18447	17.5655	12.0822	51.8091	32.9583	21.405	11.4626	59.0205	9.4944	23.0547	30.8314	10.8028	66.9614	60.7192	74.7327	63.306	57.6101	0.134716	0.178408	3e-07	0.834177	0.0038284	0.0038899
166__11-HDoHE	22.9324	15.7398	16.1084	0	28.1281	47.5126	54.1707	0	0	98.1402	10.5859	36.5897	33.992	13.5643	87.1393	75.7937	88.8088	59.7758	48.494	0.548348	0.242822	0.0003055	0.57024	0.0209069	0.0943954
170__13-HDoHE	28.5409	14.8799	0	16.7968	20.291	67.2487	24.618	27.7808	13.0498	76.7358	11.4789	41.7667	23.7878	10.785	63.013	55.9241	56.0923	72.5262	70.1491	0.18536	0.237381	3.7e-05	0.988328	0.0287957	0.066063
171__14-HDoHE	302.929	105.257	109.318	114.69	88.9094	730.939	91.9663	75.1935	82.1362	185.768	78.4453	165.019	144.853	44.7381	331.354	232.434	288.386	237.421	282.568	0.583915	0.681434	0.0179216	0.511053	0.868225	0.0016275
175__16-HDoHE	17.4054	20.8693	30.3732	19.0714	29.2015	93.6211	70.4145	70.6913	19.6593	101.315	13.2997	58.0731	49.1595	16.9604	140.478	81.8459	118.005	101.478	118	0.0802571	0.203376	0.0004871	0.508597	0.0287433	0.0089838
176__17-HDoHE	268.663	113.358	94.2637	105.798	128.74	677.07	136.249	109.679	192.28	322.376	70.009	110.619	100.557	60.3596	406.929	307.947	239.546	270.137	336.026	0.387095	0.875536	0.0043034	0.297313	0.822299	0.0128329
178__16,17-EpDPE	1593.27	1186.32	1661.4	1517.28	1938.29	7978.73	5237.86	6378.93	6167.62	3672.76	1439.17	2986.06	3209.43	3065.27	8222.99	10521.5	12814.1	10297.8	13471.4	0.0025772	0.023655	0.0004825	0.0009933	0.0057826	4.15e-05
180__20-HDoHE	31.2073	48.3116	31.9688	34.997	77.9324	227.304	158.706	131.402	27.8467	241.427	15.3512	87.6169	37.5213	50.4937	186.767	332.29	233.706	230.935	376.356	0.112047	0.367479	0.0022554	0.422883	0.0404746	0.0086434
181__19,20-EpDPE	2633.27	2487.88	2612.89	2605.95	3092.55	14618.2	9645.87	12019.4	11749.5	6574.77	2635.38	5780.66	5017.84	6241.77	16429.9	16154.5	27736.5	17895.5	26175.8	0.0025782	0.0211029	0.0019071	0.0007862	0.0207461	0.0024214
182__19,20-diHDoPE	39.685	18.4431	22.2657	30.9888	14.0178	62.4052	35.8268	47.043	74.9689	100.939	49.5107	57.1686	36.8528	54.8347	239.888	302.633	111.688	204.659	172.019	0.0136615	0.0184075	0.0044421	0.749209	0.0075925	0.0025303
183__21-HDoHE	0	0	0	0	0	0	0	55.9943	0	59.2541	31.1795	35.0088	0	0	227.855	147.928	255.288	135.286	334.009	0.391002	0.0909346	0.0038216	0.552408	0.0020345	0.0043302
184__22-HDoHE	0	0	0	0	0	0	0	0	0	0	0	0	0	0	35.9951	0	37.9935	0	26.0979	No info.	No info.	0.0761296	No info.	0.0761296	0.0761296
195__7,17-diHDoHE	4.97167	0	3.86867	8.24676	9.3844	11.8805	20.2753	18.5204	7.59641	9.28358	7.2743	9.78713	6.40305	59.8292	14.2571	7.98391	6.89584	7.31764	14.6654	0.0231517	0.272546	0.0750125	0.729836	0.223451	0.471381
196__10,17-diHDoHE	5.64442	1.37627	3.3985	0.913015	1.4217	23.5042	2.43423	2.44424	1.96428	2.40763	3.51865	2.20554	0.706674	2.32246	3.45768	11.3003	3.31819	5.42562	1.21034	0.414988	0.756117	0.252009	0.38784	0.617003	0.194391
200__14,20-diHDoHE	5.79021	1.85184	6.98931	4.23371	1.01349	3.41216	2.14699	14.7792	5.53151	9.28714	8.90597	12.5992	10.5485	26.6756	25.7615	18.2223	0.499377	10.2216	5.23241	0.406206	0.0256071	0.152946	0.159582	0.365938	0.780949
262__9-HODE	689.922	395.669	190.282	103.641	195.179	836.736	353.214	248.958	325.59	285.431	134.8	291.784	206.663	133.491	324.89	485.684	340.58	225.155	350.958	0.475685	0.373215	0.794314	0.182521	0.474325	0.0371564
263__9,10-EpOME	7555.33	4369.44	3127.17	3146.67	2503.07	9987.38	4992.78	3815.76	5911.27	5415.04	2487.41	6160.98	7492.51	2735.78	5759.91	5537.36	5977.93	4410.36	11188.9	0.233684	0.604513	0.14122	0.441538	0.830012	0.295994
264__9,10-diHOME	305.623	202.356	69.0237	131.062	117.718	275.211	220.337	180.501	187.735	277.65	243.171	145.23	182.137	172.336	274.137	256.994	91.1267	104.058	105.77	0.346223	0.438593	0.983135	0.734285	0.353364	0.449506
265__13-HODE	1603.38	548.193	369.196	360.012	510.533	2269.45	142.723	600.66	360.117	842.569	310.627	688.051	514.422	338.351	694.066	628.523	869.201	611.892	609.032	0.751884	0.599999	0.986526	0.578832	0.762714	0.239341
266__12,13-EpOME	11710.6	6487.97	3844.34	5134.43	2984.93	14981.7	6721.97	5673.38	7969.71	8951.8	3782.56	8815.6	11498.2	3034.81	8092.13	6718.7	8070.17	7016.6	15493.5	0.306001	0.611686	0.210879	0.554817	0.928857	0.442398
269__9-oxo-ODE	714.064	850.92	265.367	399.081	416.77	1601.41	603.191	416.824	391.168	836.037	226.109	1071.63	830.432	407.409	636.294	648.029	876.664	518.58	591.669	0.4508	0.465644	0.344013	0.804785	0.756177	0.90685
270__13-oxo-ODE	1.65759	2.55858	1.14285	1.69236	3.36926	3.59617	1.96545	172.856	4.58753	2.91228	0.473989	2.89446	0.742819	1.2197	3.18821	0.915373	2.06214	2.38394	217.192	0.378558	0.526033	0.373394	0.374463	0.992432	0.369082
272__9-HOTrE(n3)	34.9819	30.6401	14.4025	10.9456	14.6232	61.9867	15.5904	15.4339	12.1562	16.5714	8.76519	12.2766	17.7609	4.78051	23.637	30.1305	32.3855	12.429	14.5661	0.675283	0.132936	0.816642	0.319918	0.757767	0.0533794
275__13-HOTrE(n3)	155.464	49.6444	31.0893	41.8889	31.5717	306.684	32.0811	26.9382	76.2227	28.585	20.461	21.7869	32.7193	15.8221	34.643	28.331	38.8427	31.3291	46.1317	0.473707	0.18324	0.333588	0.282822	0.342569	0.0243289
281__9-oxo-OTrE(n3)	7.57718	9.69082	2.22022	6.94078	0.621231	10.0282	9.83205	2.43694	2.71805	3.43541	3.10009	8.89392	7.41528	4.9608	6.32933	15.5651	11.248	1.86252	7.32567	0.762948	0.943038	0.319872	0.768346	0.514714	0.292751
290__13-HOTrE(n6)	218.536	664.785	281.301	229.294	416.073	421.593	507.73	198.497	367.831	699.307	165.207	279.225	457.573	104.679	168.807	103.482	730.809	793.201	123.333	0.917235	0.882536	0.903953	0.815478	0.958317	0.826666
303__PGE1	28.5592	6.6166	4.88005	0	8.83702	33.6832	6.77755	7.948	4.9968	3.06642	3.22209	9.86364	7.08481	0	0	7.85793	9.28649	6.85154	3.97244	0.675133	0.353369	0.442847	0.293936	0.340906	0.70164
304__PGD1	25.3214	3.5887	2.93493	0	0	0	0	0	0	5.59167	0	8.19385	10.4161	0	0	0	17.4071	0	0	0.254812	0.778001	0.639111	0.0843361	0.373901	0.747366
308__8-HETrE(n6)	32.9779	71.6866	49.9036	36.1489	45.4092	0	0	0	0	43.4647	0	0	0	0	0	0	0	0	0	0.0023025	0.0082663	0.0023025	0.373901	No info.	0.373901
314__15-HETrE(n6)	53.623	18.9164	11.5503	15.0219	13.7561	66.2323	13.3138	11.8069	10.6498	17.2379	6.80184	11.9925	16.5405	5.85238	16.6786	18.851	21.664	10.6483	3.3869	0.849749	0.244972	0.356184	0.386469	0.473873	0.543242
318__LTB3	0	0	0	0	0	0	0	0	0	0	0	11.2833	6.60003	0	0	0	0	0	0	No info.	0.196776	No info.	0.196776	No info.	0.196776
319__5-HETrE(n9)	0	0	0	0	0	13.0637	0	0	0	0	0	0	10.881	2.66683	0	0	0	0	0	0.391002	0.267867	No info.	0.885734	0.391002	0.267867
355__16:0 Palmitic Acid	570942	630984	651011	547283	420057	630881	680299	525896	578226	672562	491219	646123	704984	497790	719750	689398	605879	553347	685160	0.490204	0.544026	0.127816	0.98314	0.337432	0.403288
356__16:1 Palmitoleic Acid	34880.6	22234.3	16568.4	16535.7	11114.4	29704.3	11380	10203.1	13327.5	14003.9	10655.7	30517.3	40962.7	6799.49	22656.1	16484.4	10527.2	9664.38	15356.5	0.521706	0.967604	0.287865	0.613594	0.807501	0.437284
357__18:0 Stearic Acid	250768	327446	282790	264260	205912	250590	296656	223203	210880	280781	241552	234215	266991	240483	287936	294620	254786	270376	262087	0.480451	0.555075	0.725821	0.71367	0.171081	0.10893
358__18:1 Oleic Acid(n9)	102167	68819.8	86626.3	76385.6	65238.4	102728	80612.1	60982.7	87461.4	82425.1	50704.1	106228	121558	53817.9	82114.8	86262.1	57661.6	62786.1	99403.5	0.781098	0.846623	0.834424	0.999971	0.661127	0.748659
359__18:2 Linoleic Acid	296841	210841	273801	204135	195038	334805	224814	196551	274238	295467	152495	340855	393941	204981	310271	269519	222928	218447	335147	0.563339	0.418872	0.28955	0.734871	0.725782	0.902587
360__18:3 a-Linolenic Acid(n3)	54842.3	29135.5	35318.8	20299.5	22849.9	41035.6	32032.7	22266.5	41844.7	32419.3	18616.1	46833	57795.5	20517.9	43137.7	35780.8	27443.4	23133.3	48750.8	0.829304	0.785461	0.695452	0.923633	0.846176	0.964273
361__18:3 g-Linolenic Acid(n6)	134439	86846.8	90949.3	66496.5	52929.7	133262	75542.9	65573.7	113366	114313	57799.7	130948	143606	63683.8	128602	105076	78143.1	73841.5	132006	0.629487	0.501259	0.378604	0.838596	0.746741	0.947002
362__18:4 Stearidonic Acid	233.353	119.198	155.62	94.1847	106.757	295.854	0	0	179.81	270.951	215.395	499.968	437.35	164.315	205.488	211.747	92.5766	144.36	369.721	0.752515	0.0350815	0.268541	0.0802725	0.334536	0.194911
363__20:3 DGLA(n6)	15100.6	13372.9	16315.5	14919.9	15150.2	14217.5	14684.5	12055.8	17390.2	13519.8	9422.89	16615.5	17888	11723.4	10358.9	14797.2	10353.2	8568.04	17172.4	0.736759	0.515906	0.168283	0.718469	0.293434	0.498066
364__20:3 Mead Acid(n9)	2207.08	1744.07	2314.63	2255.19	1874.11	1199.49	1003.57	892.214	1144.73	1044.16	797.615	1406.41	1866.76	662.505	837.142	1038.09	779.611	684.047	1038.76	0.0001838	0.0055805	1.85e-05	0.718993	0.110241	0.257125
365__20:4 ETA(n3)	679.765	654.88	891.438	598.265	586.646	436.383	453.547	381.76	581.913	1572.47	1152.55	1830.91	1666.08	1221.36	367.963	548.771	291.259	294.21	493.137	0.0196886	0.0004558	0.0058306	0.0002712	0.389117	5.46e-05
366__20:4 Arachidonic Acid(n6)	157634	200158	231522	239283	231313	961839	868705	731918	971572	228534	134194	214765	247237	200431	193865	178893	178684	164969	220291	0.0006858	0.784364	0.204686	4.4e-06	0.0008676	0.434365
367__20:5 EPA	9253.4	9031.55	12277.6	10176.7	8146.15	7792.84	7349.73	5376.71	6685.53	287179	177460	290341	239473	204996	41381.4	36868.9	26999.4	16781.7	38853.2	0.0145129	0.0004888	0.0073592	0.0004667	0.0048253	0.0005394
368__22:4 Adrenic Acid	4919.83	3607.95	5655.05	4655.84	5019.68	31078.2	26784.7	18634.9	26989	2786.37	1435.06	2074.74	2391.02	1852.35	1583.09	1832.88	1213.94	1131.76	1777.61	0.0035841	0.0001754	1.89e-05	0.0026527	0.0025428	0.0578811
369__22:5 DPA(n3)	11692.5	14587.4	20927.1	18583.3	18049.6	31414.6	28249.4	33967.6	35736.3	73793.3	54831.9	80493	82057	87130.3	22157.9	24937.7	19417.5	15210.7	25415.4	0.0002823	0.0002459	0.0984131	0.0002971	0.0038549	1.66e-05
370__22:5 Osbond Acid(n6)	2120.94	1594.52	2728.82	1924.42	2384.17	14257.2	12980.3	10321.5	11567	1590.92	691.552	925.073	970.603	1245.56	1030.1	1469.76	1014.72	949.234	1525.33	0.0008618	0.0025947	0.0032151	0.0007266	0.0008266	0.582583
371__22:6 DHA	88329.1	121254	212420	158846	155478	377073	424696	339762	346380	299489	168539	236738	240073	318811	642503	643617	532012	563028	709387	0.000112	0.0139386	1.6e-06	0.0106525	0.0004456	2.09e-05

## Sheet: Adipose pg_100mg
Sample Name	Control_adipose_No.1	Control_adipose_No.2	Control_adipose_No.3	Control_adipose_No.4	Control_adipose_No.5	AA_adipose_No.16	AA_adipose_No.17	AA_adipose_No.18	AA_adipose_No.19	AA_adipose_No.20	EPA_adipose_No.6	EPA_adipose_No.7	EPA_adipose_No.8	DHA_adipose_No.11	DHA_adipose_No.12	DHA_adipose_No.13	DHA_adipose_No.14	DHA_adipose_No.15	Q-values (Control vs ARA)	Q-values (Control vs EPA)	Q-values (Control vs DHA)	Q-values (ARA vs EPA)	Q-values (ARA vs DHA)	Q-values (EPA vs DHA)
001__PGE2	21.2705	72.1282	34.0073	539.539	423.628	430.548	369.401	314.014	587.731	588.434	20.5181	5.55648	1544.75	15.7076	10.3076	912.4	28.1117	364.04	0.0869697	0.613278	0.821901	0.909842	0.345829	0.579585
002__PGD2	53.4711	153.733	61.9237	133.378	81.5918	844.457	925.466	1273	288.447	1423.94	48.7045	42.8209	3.81194	83.2548	46.4593	7.05023	103.517	73.103	0.0120231	0.0621573	0.224624	0.0094432	0.0105782	0.253925
004__15-keto-PGE2	0	0	0	45.9464	51.1422	140.038	1860.47	259.317	311.436	1390.69	0	24.4834	116.324	0	0	53.8898	50.5495	66.7025	0.091284	0.399529	0.447997	0.0995685	0.0957022	0.70566
007__15-deoxy-PGJ2	0	8.48691	16.9318	0	0	18.6472	0	0	0	0	0	0	0	0	0	0	0	0	0.794882	0.20781	0.20781	0.373901	0.373901	No info.
008__PGF2a	0	41.4762	31.1853	57.9932	22.5928	201.529	196.636	153.182	114.542	237.207	23.6374	0	35.6987	0	0	33.0371	26.6083	23.1103	0.0002029	0.49572	0.27021	0.0015366	8.03e-05	0.797172
009__6-keto-PGF1a	543.694	874.329	909.083	1555.12	891.368	2726.07	3512.11	3469.03	3605.65	4850.89	440.31	243.237	608.485	334.809	164.868	347.864	435.927	699.969	0.0001077	0.0652025	0.0172671	0.0004538	0.0004379	0.816183
011__TXB2	40.5478	58.7816	76.309	73.2857	41.6348	208.5	295.933	371.002	200.145	420.787	57.3393	28.5125	51.7978	45.4979	0	0	33.7313	28.1255	0.0046388	0.346088	0.0151824	0.0036986	0.0025235	0.128709
012__12-HHTrE	51.9639	80.2942	51.0322	95.3265	79.796	241.249	381.117	223.897	176.204	389.733	40.3046	25.5614	30.3462	29.9598	9.55613	33.772	44.3901	41.336	0.0073345	0.0165427	0.0056503	0.0042933	0.0041026	0.976609
028__5-HETE	222.764	97.901	129.664	169.235	265.685	1106.9	3868.79	909.51	1262.68	2684.17	106.21	86.0702	137.199	89.663	104.006	109.422	191.429	167.014	0.0346484	0.160581	0.252775	0.0310409	0.0322016	0.461
029__5,6-EET	303.734	64.8513	201.619	149.681	419.577	1446.47	2036.81	5870.38	1348.51	6049.4	114.948	878.692	44.6593	1000.31	95.888	90.1834	196.738	189.967	0.0434475	0.704645	0.649176	0.0824926	0.0463232	0.92036
030__5,6-DHT	49.0736	26.0601	39.7821	33.7745	46.1244	398.435	1172.04	377.951	598.116	662.322	26.6272	10.9408	31.562	25.4887	31.8554	29.5526	50.0662	44.8098	0.0136853	0.0683702	0.689338	0.0124921	0.0134787	0.136742
031__8-HETE	95.9081	0	58.3304	71.8551	87.39	343.2	1204.12	434.556	497.632	649.119	90.1917	70.1101	53.5059	84.6628	74.3789	52.4585	84.2343	93.5531	0.020711	0.732024	0.432725	0.022065	0.0230392	0.607683
032__9-HETE	66.8957	0	0	0	0	320.645	1554.65	348.28	567.251	779.587	0	0	0	43.1337	19.5766	0	0	69.1442	0.0360285	0.373901	0.510788	0.0341692	0.0381144	0.118795
033__8,9-EET	5403.57	2493.29	3399.83	3714.95	6176.68	32186	43300.9	28699.6	36078.9	50315	2946.43	2718.64	2926.87	3849.22	2241.97	2548.74	4868.45	3490.25	0.0007837	0.111828	0.338785	0.0008251	0.0007904	0.321
034__8,9-DHT	45.198	42.6348	30.6402	43.7939	76.1744	342.292	713.972	465.787	471.74	482.443	55.0408	20.2856	33.8932	42.421	19.807	23.0072	34.0027	35.2194	0.0016075	0.402131	0.088002	0.0013625	0.0014895	0.572276
035__11-HETE	82.0077	95.3726	70.0998	364.615	242.322	663.701	1210.06	478.75	806.849	800.2	68.5971	37.6573	507.547	52.1809	38.8012	271.641	95.007	208.311	0.001635	0.810885	0.62205	0.0236448	0.0009101	0.592719
036__12-HETE	740.047	496.997	426.966	600.934	588.457	1866.82	5359.15	2239.42	3308.56	2616.32	346.994	295.337	462.294	1229.59	143.375	142.475	219.303	320.489	0.0151312	0.0431606	0.492378	0.011633	0.0034795	0.882851
037__11,12-EET	6272.84	3315.09	3257.4	3820	6613.73	35139.8	43196	32159.3	36316.1	46417.6	2821.04	2730.37	2455.46	3539.96	2125.48	2760.98	4555.68	3774.71	0.0001041	0.0538224	0.162984	0.0001685	0.0001439	0.272431
038__11,12-DHT	34.1928	21.0507	23.9084	30.409	38.5305	191.353	409.921	269.024	268.083	272.596	19.8549	19.9828	23.5995	33.7831	14.4475	21.5243	26.0422	17.6425	0.0019427	0.101352	0.176042	0.0017852	0.001743	0.748864
039__15-HETE	187.101	118.545	105.794	208.286	157.8	865.686	3329.32	692.527	1224.2	2319.21	118.469	57.3254	186.082	86.5078	65.6336	107.352	149.075	131.876	0.0372576	0.389633	0.0904893	0.0346447	0.0340063	0.723024
040__14,15-EET	12618.3	6024.65	6994.68	8321.2	13233.3	66163.7	85877.1	59691.3	72149.9	89211.3	4762.82	5284.85	4652.4	7183.74	4067.33	5929	8905.76	6875.76	0.0001806	0.0361934	0.127338	0.0002463	0.0002283	0.164077
041__14,15-DHT	99.8383	72.3672	72.1141	89.8698	174.569	832.82	1634.58	1153.32	1062.88	1131.54	91.6968	61.1382	71.7894	127.371	53.1518	90.1915	131.944	94.2523	0.0010981	0.343024	0.922972	0.0011074	0.001153	0.269806
042__16-HETE	0	0	0	13.7958	18.843	50.9166	200.47	48.6047	65.1344	97.1034	0	0	10.8006	0	0	0	0	17.2976	0.0379728	0.64495	0.581817	0.0344428	0.0343104	0.97972
044__17-HETE	15.3693	0	0	0	10.3543	73.7546	110.61	61.1991	104.62	99.465	9.33055	0	24.2621	0	0	0	17.6314	12.2631	3.04e-05	0.403573	0.870817	0.001222	3.7e-05	0.495446
046__18-HETE	50.8108	45.1869	27.0493	41.1137	47.6082	344.325	612.082	310.196	665.226	428.675	57.2993	68.8113	56.3629	22.4942	29.7989	31.793	50.4522	39.6795	0.0037355	0.0253918	0.268326	0.0043947	0.0034859	0.0099174
048__19-HETE	105.374	103.687	0	0	128.731	688.955	1079.33	579.414	1069.25	1284.78	48.8368	56.6563	0	0	41.5475	37.1594	73.1124	66.6783	0.0021718	0.442747	0.460639	0.0021482	0.0023251	0.706052
050__20-HETE	0	0	0	0	0	137.048	267.182	109.777	205.238	291.186	0	0	0	0	0	0	0	0	0.0046135	No info.	No info.	0.0046135	0.0046135	No info.
051__5-oxo-ETE	62.8481	40.5619	56.6811	58.4179	57.0427	329.543	2053.41	490.653	589.722	1194.74	43.3384	0	47.3902	0	43.1176	54.0139	88.4574	47.8887	0.0502882	0.0872333	0.592301	0.0463325	0.0488637	0.480009
054__15-oxo-ETE	145.307	57.8775	57.7046	62.7659	75.7698	441.556	5579.71	1430.77	998.056	3038.01	96.3584	48.3457	58.1012	39.8544	63.5582	68.1546	147.09	86.3255	0.0750713	0.636456	0.965094	0.0740024	0.0751673	0.630115
056__5,6-diHETE-1	0	0	0	0	43.6057	0	0	0	0	0	0	0	0	0	0	0	0	0	0.373901	0.373901	0.373901	No info.	No info.	No info.
065__PGE3	0	0	0	0	0	0	0	0	0	0	95.8303	90.5406	619.631	0	0	147.308	0	90.6235	No info.	0.265439	0.193583	0.265439	0.193583	0.33418
066__PGD3	0	0	0	67.9842	0	0	0	0	0	0	374.157	421.652	2633.4	0	0	484.959	0	293.701	0.373901	0.268866	0.229548	0.264831	0.194552	0.315714
070__6-keto-PGF1a-17delta	0	0	0	0	0	0	0	0	0	0	109.425	84.6046	124.689	0	0	0	0	0	No info.	0.0118727	No info.	0.0118727	No info.	0.0118727
071__TXB3	0	0	0	0	0	0	0	0	0	0	31.0498	43.6502	35.3838	0	0	0	0	0	No info.	0.0099933	No info.	0.0099933	No info.	0.0099933
077__LXA5	0	13.1261	0	0	0	9.18297	0	0	0	0	44.9653	0	25.1611	0	0	0	0	0	0.811766	0.249116	0.373901	0.238083	0.373901	0.214236
082__RvE2	0	0	0	0	0	0	0	0	0	0	0	28.841	0	0	0	0	0	0	No info.	0.42265	No info.	0.42265	No info.	0.42265
083__5-HEPE	219.783	35.8818	106.893	75.3335	350.035	292.256	597.404	250.186	368.273	364.166	1222.98	1161.71	1557.41	328.035	444.09	366.743	587.64	629.659	0.0306809	6.4e-05	0.005196	0.0002323	0.28528	0.0004127
086__8-HEPE	18.3181	0	13.7886	0	28.1465	0	60.1553	13.8938	26.4483	21.2516	274.808	227.735	284.591	37.3963	62.8884	60.5665	72.771	75.4019	0.311302	2.7e-06	0.0004271	1.35e-05	0.0144575	1.38e-05
088__9-HEPE	0	0	0	0	0	0	83.7926	0	0	0	426.049	288.689	296.242	43.6053	123.955	82.0594	63.0434	81.3062	0.373901	0.0170545	0.0040777	0.0001886	0.0199297	0.0004357
089__8,9-EpETE	932.206	217.641	390.009	335.034	1220.99	1001.39	1096.36	618.756	863.631	973.798	11849.2	23828.6	14158.2	2775.18	1639.82	2201.32	3662.04	2651.26	0.203942	0.0484566	0.0009512	0.0504474	0.006196	0.0609884
091__11-HEPE	31.4748	13.1567	13.1456	18.4297	42.9241	37.1344	68.7391	24.3263	29.6821	34.7785	393.016	305.341	577.008	53.2691	75.9842	107.159	120.309	122.619	0.158623	0.0369462	0.0012002	0.039262	0.0064656	0.0507361
093__12-HEPE	74.3448	37.8678	40.8094	79.8786	94.178	114.054	267.996	80.2273	140.152	121.568	1126.34	1721.37	2456.33	1206.72	184.846	195.995	328.72	348.993	0.0486087	0.0473276	0.11272	0.0509045	0.183558	0.0133819
095__11,12-EpETE	873.629	248.148	463.093	374.793	1187.58	1012.27	1121.77	629.496	764.898	770.636	13834.5	20051.4	13786.8	2691.56	1849.91	2151.71	3379.71	2537.98	0.274405	0.0175165	0.0003086	0.018467	0.0003096	0.0219601
097__15-HEPE	119.511	77.9565	82.173	68.5284	127.337	279.225	329.331	98.5477	212.174	248.375	1020.42	1111.67	1667.79	396.514	242.054	240.048	392.205	387.591	0.0207371	0.0281962	0.0019848	0.0323528	0.104766	0.0398852
099__14,15-EpETE	2506.33	667.901	957.663	915.601	3294.68	2671.61	2893.4	1683.56	2083.76	2253.48	31292.1	50680	36253.1	7254.31	4404.24	6035.43	9321.76	6400.67	0.282408	0.0221981	0.0007946	0.0235795	0.0043845	0.0281994
101__18-HEPE	30.6042	0	12.7573	15.2751	30.6452	22.506	89.809	24.9128	33.0769	34.2192	399.562	299.808	412.975	61.4847	58.3296	88.3608	110.996	108.143	0.131692	0.0086896	0.0006652	3.98e-05	0.0284434	7.72e-05
103__17,18-EpETE	2559.49	898.253	1216.72	1251.44	3768.3	2837.25	2658.24	2069.03	2719.79	2307	41154.1	55889.7	45728	8368.05	4951.22	7176.24	9132.79	7031.37	0.35064	0.0082104	0.0003069	0.0091479	0.0020175	0.0099817
105__17,18-diHETE	130.673	105.356	157.271	159.44	286.729	128.525	551.411	345.513	98.4035	0	3672.95	4211.28	3142.28	597.759	738.061	798.252	1035.37	1112.72	0.609208	0.0071825	0.00013	1.17e-05	0.0017824	3.55e-05
107__20-HEPE	0	0	0	0	0	0	0	0	0	0	303.653	452.417	400.897	166.698	316.724	226.54	341.961	154.072	No info.	0.01255	0.0032236	0.01255	0.0032236	0.0530174
158__4-HDoHE	189.998	80.8171	107.313	147.811	187.275	127.334	787.029	316.411	219.846	547.684	273.219	103.097	220.098	659.603	1250.24	1281.66	2240.63	1924.3	0.0974168	0.273967	0.0085647	0.265124	0.0075489	0.0092825
161__7-HDoHE	46.7852	26.4748	31.8228	0	51.0917	47.4884	150.323	54.0122	62.1668	91.2612	89.0856	54.068	64.5447	226.354	363.911	331.894	821.295	570.627	0.0444488	0.0370935	0.0147502	0.6686	0.0212828	0.0199727
162__8-HDoHE	167.298	47.9638	92.4026	102.737	166.353	130.965	381.999	150.173	103.453	245.4	223.98	102.765	217.995	762.985	1169.78	1034.26	1787.33	1598.25	0.157323	0.166048	0.0032403	0.787	0.0034932	0.0048615
165__10-HDoHE	47.8423	21.7294	31.5723	22.0682	42.5069	48.2417	108.815	39.7232	36.14	62.9269	60.9388	34.5194	79.3923	263.766	315.864	263.166	451.545	418.18	0.105391	0.0778869	0.0012512	0.966201	0.0001325	0.0017568
166__11-HDoHE	55.3219	16.2351	51.35	33.5711	65.5162	47.5769	135.436	54.3754	70.8278	73.6738	78.9174	42.0829	53.7357	259.072	415.653	432.806	638.963	618.674	0.110767	0.363644	0.0034511	0.445421	0.0040687	0.0037754
170__13-HDoHE	66.1501	27.8819	49.549	136.808	164.862	65.4873	146.368	64.8888	122.673	90.9746	98.8219	58.0702	205.752	347.041	463.616	675.003	694.683	889.564	0.777074	0.528545	0.0039563	0.576511	0.004983	0.009206
171__14-HDoHE	370.038	253.622	172.985	171.761	178.733	474.41	725.506	303.946	350.069	395.151	215.086	171.687	307.614	3427.41	963.62	734.618	1780.84	1721.64	0.0301001	0.973585	0.033655	0.0793609	0.0531585	0.0337731
175__16-HDoHE	93.8555	47.5946	47.6244	68.0277	99.8918	96.2227	217.068	78.8782	105.471	125.438	124.196	116.029	107.695	533.089	653.88	662.385	1055.25	978.961	0.0815029	0.0261296	0.0021103	0.743544	0.0023128	0.0028408
176__17-HDoHE	478.718	257.088	228.689	198.227	259.812	479.398	680.355	344.046	410.631	449.788	288.945	242.376	349.395	2663.32	1649.85	1176.49	2306.6	2149.09	0.0370868	0.901439	0.002355	0.0632265	0.0035737	0.0026782
178__16,17-EpDPE	8796.92	3426.49	5127.62	3912.61	9201.15	7460.26	8136.11	9323.28	6297.08	10807.2	9041.38	10786.9	8309.7	64028.1	40023.5	52632.4	77082.5	59532.1	0.148418	0.103466	0.0007815	0.434795	0.0010893	0.0011894
180__20-HDoHE	212.754	87.1467	123.504	76.4494	178.301	161.273	553.359	198.475	172.161	321.182	245.618	160.25	209.588	798.916	970.052	1268.38	1995.9	1821.53	0.0998147	0.127902	0.0058616	0.475202	0.0074393	0.0072698
181__19,20-EpDPE	11755	4839.83	7312.52	6333.58	12599	10292.4	11996.7	13578.5	10183.5	14016.6	12459.2	15706	11831.3	86813.1	54542.2	72078.5	110545	89869.7	0.0811185	0.0756778	0.0011556	0.376191	0.0015654	0.0015965
182__19,20-diHDoPE	70.8785	73.6252	47.0527	86.3781	114.396	104.917	154.41	167.574	92.0206	139.47	186.023	155.348	113.195	965.51	653.947	858.41	1125.17	1271.86	0.0188671	0.0139236	0.0010195	0.451309	0.0012333	0.0012058
183__21-HDoHE	177.737	126.769	87.9675	130.935	169.527	207.027	224.942	191.506	244.286	194.444	136.731	224.957	150.408	563.438	1050.68	1013.44	1919.92	1604.19	0.0046149	0.317454	0.0100915	0.132428	0.0129476	0.0109406
184__22-HDoHE	0	0	0	0	19.949	23.3016	19.4912	0	0	30.7836	0	26.5174	0	185.843	263.269	212.372	383.422	349.283	0.187231	0.583191	0.0018613	0.59832	0.0019924	0.0019072
196__10,17-diHDoHE	0	0	0	0	0	0	21.2585	0	0	40.3264	0	0	0	89.3986	38.4478	45.7045	52.336	77.9519	0.204022	No info.	0.0034085	0.204022	0.0051474	0.0034085
262__9-HODE	2446.34	1245.36	989.112	1438.73	2897.48	2245.51	4003.61	857.615	2712.89	2853.43	1631.08	1504.15	1407.2	1526.35	1715.35	1688.81	2717.11	2287.92	0.278322	0.480424	0.681229	0.115557	0.353714	0.167954
263__9,10-EpOME	235239	96417.7	101801	134542	210410	189364	196178	49140.4	199596	165836	108427	140452	101174	171625	117577	132257	224760	171253	0.916572	0.355286	0.824139	0.306734	0.921028	0.126518
264__9,10-diHOME	2731.28	1453.86	1079.67	1524.48	3483.62	2544.12	3665.91	1245.16	3153.54	2299.98	2117.14	2170.02	1711.77	3080.36	2098.03	2089.59	3156.2	2894.89	0.41324	0.931427	0.266873	0.336578	0.866769	0.0928639
265__13-HODE	6097.98	2551.03	2531.69	3420.37	6227.02	5180.18	10258.3	1952	6487.63	6633.35	3316.36	3439.28	3029.12	3508.53	3824.09	3582.5	6588.28	5545.98	0.253685	0.340102	0.679548	0.100776	0.340946	0.0947566
266__12,13-EpOME	242034	112628	108966	137737	217331	183899	189503	51036.8	194861	164734	110189	141499	112993	193408	124205	144672	263474	188438	0.861923	0.304646	0.616151	0.373196	0.491179	0.111383
269__9-oxo-ODE	10407.8	3448.35	3542.55	4809.8	7934.6	5261.18	39143.9	4713.6	11663.5	28430.3	5145.45	6109.35	4765.11	5444.18	5493.96	5310.79	12811.9	8069.12	0.160084	0.721096	0.501127	0.141443	0.204558	0.324501
270__13-oxo-ODE	8480.28	1996.53	1844	2632.5	4915.05	3706.44	37067.7	3559.38	9765.1	20950.2	4082.48	3695.87	3560.13	4039.47	4352.2	5188.65	11441	5695.35	0.158552	0.88509	0.273968	0.152049	0.238685	0.156671
272__9-HOTrE(n3)	196.799	55.2294	76.5406	78.9234	198.791	124.413	299.756	69.5118	183.615	193.523	140.512	85.324	96.5385	85.1315	106.004	100.143	126.562	126.328	0.318769	0.763342	0.719688	0.253349	0.166372	0.935263
275__13-HOTrE(n3)	236.638	115.324	130.539	132.406	188.753	292.292	415.957	94.0963	384.896	311.193	106.718	113.985	103.792	193.507	143.09	137.836	222.127	184.881	0.0511629	0.0812786	0.590125	0.0270035	0.0927856	0.0117366
281__9-oxo-OTrE(n3)	119.86	34.4464	74.1651	58.415	136.474	70.9009	388.479	37.3201	143.428	212.872	61.3182	32.3694	72.301	34.0297	83.803	74.8064	151.794	111.686	0.24745	0.315974	0.816508	0.138662	0.280967	0.240273
303__PGE1	0	41.8481	0	491.955	186.896	52.5146	0	0	0	0	0	0	0	17.0561	0	0	0	0	0.226836	0.198001	0.206779	0.373901	0.538713	0.373901
304__PGD1	0	0	0	0	0	0	0	0	0	0	0	0	0	0	0	0	31.8655	0	No info.	No info.	0.373901	No info.	0.373901	0.373901
314__15-HETrE(n6)	82.6028	61.148	35.8355	57.8126	65.8301	109.938	241.803	76.996	127.3	158.805	47.0947	21.6813	48.2807	44.4212	39.7369	30.1039	85.1536	67.1049	0.0402646	0.118231	0.57401	0.0336134	0.0167409	0.371119
319__5-HETrE(n9)	27.0024	17.2908	0	18.62	23.9223	12.9311	40.7054	0	0	30.4443	0	0	0	10.7333	0	0	22.5195	12.4946	0.954812	0.0207103	0.229729	0.108864	0.429377	0.0972255
355__16:0 Palmitic Acid	2.32452e+06	1.3528e+06	1.27994e+06	1.45209e+06	2.29775e+06	2.21936e+06	2.59525e+06	919255	2.93757e+06	2.58635e+06	1.46837e+06	2.10911e+06	1.31602e+06	2.27789e+06	1.55959e+06	1.92352e+06	2.26682e+06	2.07661e+06	0.261996	0.769253	0.329522	0.262409	0.55668	0.170819
356__16:1 Palmitoleic Acid	372723	190387	174966	259673	465464	333681	357426	69309.4	378369	289949	184892	267492	181033	295606	187294	251406	321463	288144	0.932513	0.329706	0.702213	0.37314	0.786966	0.172394
357__18:0 Stearic Acid	265107	204636	220466	204864	282731	321379	333707	248035	413374	374839	230364	339712	204192	269659	215339	288305	284879	292502	0.012684	0.566877	0.147042	0.144861	0.0605608	0.747669
358__18:1 Oleic Acid(n9)	621142	442241	417470	458368	652562	667808	707274	286256	828598	714638	436722	595087	400458	597689	455226	557518	648269	580186	0.275941	0.621333	0.422772	0.258441	0.476612	0.188432
359__18:2 Linoleic Acid	1.98663e+06	1.25306e+06	1.27193e+06	1.40281e+06	2.1626e+06	2.20806e+06	2.39633e+06	850296	2.90144e+06	2.36741e+06	1.3898e+06	1.83658e+06	1.17824e+06	2.08214e+06	1.54527e+06	1.89604e+06	2.1739e+06	2.01873e+06	0.21547	0.631879	0.17504	0.208313	0.601602	0.0580747
360__18:3 a-Linolenic Acid(n3)	942118	392176	496491	582140	1.13701e+06	982585	1.2117e+06	323335	1.36632e+06	1.15785e+06	600399	826285	502704	1.03083e+06	747713	864542	1.1042e+06	1.03405e+06	0.231284	0.750662	0.152259	0.198082	0.794353	0.0310778
361__18:3 g-Linolenic Acid(n6)	406220	121149	152770	179394	372029	408293	622441	163363	548339	592542	173849	296157	138648	345193	279554	306116	471432	383148	0.0646559	0.633047	0.142501	0.0659891	0.260383	0.0346702
362__18:4 Stearidonic Acid	7413.86	1977.03	4029.78	4373.58	16802.8	11367.1	16932.1	5843.37	14780.6	15540.6	8471.58	10719.6	6925.64	9902.33	8126.42	9721.53	12962.2	12810.1	0.106705	0.635904	0.210981	0.181111	0.3488	0.229023
363__20:3 DGLA(n6)	93161.9	54626.4	53256.2	62702.6	123932	98039.2	133068	56572.6	100392	136611	63239.8	77165.6	46424.8	79970.4	48127.4	52527.2	85002.5	92541.5	0.206165	0.460003	0.727163	0.0813164	0.0863517	0.516759
364__20:3 Mead Acid(n9)	17950.4	9644.72	7167.89	8500.91	20467.2	11659.1	13372	3580.69	9108.69	12416.3	4254.57	6241.91	4408.12	7737.18	4200.42	5097.67	7109.19	7695.82	0.423044	0.0756102	0.0760839	0.0788877	0.0907649	0.239699
365__20:4 ETA(n3)	9027.4	4788.27	5607.97	6649.47	13600.4	10435.2	12123.4	6263.95	12363.1	10090.7	13342	18522.3	11462.6	4492.1	3443.64	4165.27	5104.53	4578.72	0.262667	0.0473222	0.0864126	0.0959329	0.0045845	0.0391503
366__20:4 Arachidonic Acid(n6)	617624	385693	418582	492042	772675	2.60933e+06	3.61045e+06	2.40574e+06	3.69613e+06	3.77778e+06	369781	477913	318589	478763	338984	358382	493661	515755	0.0005298	0.190804	0.245574	0.0005352	0.0006157	0.449378
367__20:5 EPA	121686	38666.4	61059.4	58504.6	183931	155830	200439	86501.5	167274	182812	1.27371e+06	1.87644e+06	1.12485e+06	381537	287738	315332	397047	395265	0.0817931	0.027128	6.85e-05	0.0306072	0.0001702	0.0420054
368__22:4 Adrenic Acid	13049.7	9523.28	7906.06	8666.37	14211.1	47231.3	70550.1	76783.6	66350.9	102309	3348.04	4971.05	2920.08	4193.18	2383.12	2687.98	4193.48	4558.18	0.0020171	0.0070203	0.0006984	0.0014595	0.0014699	0.854279
369__22:5 DPA(n3)	48019.5	27331	34982.8	31258.9	57711.6	45196.6	62957.5	61806.6	48467.2	69224.3	174242	289779	149801	67959.1	45744.8	52289.9	74389.8	75970.8	0.0412956	0.0599936	0.022365	0.0748038	0.471372	0.0792037
370__22:5 Osbond Acid(n6)	9151.53	6935.86	5310.27	6361.47	10347.6	27461.4	41748.3	41250.8	38128.3	60188.4	2157.78	2865.84	1329.46	2626.69	1427.81	1681.28	3129.73	3312.16	0.0025394	0.0050443	0.0008426	0.0016147	0.0016839	0.615483
371__22:6 DHA	332805	148405	211326	186213	395836	360216	448013	362321	400125	505227	431162	659124	328441	1.72205e+06	1.27135e+06	1.46015e+06	1.78507e+06	1.81146e+06	0.0184895	0.0612154	2.5e-06	0.499161	0.0001898	0.000355

[truncated: 2 more sheets: Heart pg_100mg, Brain pg_100mg]
