# Supplementary material for: Characterization of Lipid Profiles after Dietary Intake of Polyunsaturated Fatty Acids Using Integrated Untargeted and Targeted Lipidomics
Source: Metabolites. 2019 Oct 21;9(10):241. doi: 10.3390/metabo9100241 (PMC6836067; doi:10.3390/metabo9100241)
Supplement: Supplementary file 1 [file metabolites-09-00241-s001.zip › Supplementary Files/Supplementary Table 3 new.xlsx]

## Sheet: Extraction
			Small intestine	White adipose	Heart	Lung	Kidney	Skeletal muscle	Liver	Brain	Spleen	Plasma
	Methanol homogenate	Weight (mg)	150-230	90-160	100-140	50-100	70-100	80-110	65-120	150-320	20-40	20uL
		MeOH (mL)	1000	1000	1000	500	500	1000	1000	2000	1000	200
	Extraction	Transferred weight (mg)	5	5	4	4	5	5	2.5	5	9	-
		Transferred MeOH (mL)	25-40	30-65	30-40	25-50	30-45	50-70	25-40	35-80	250-340	-
		Total MeOH (mL)	200	200	200	100	100	100	200	200	200	-
		CHCl3 (mL)	100	100	100	50	50	50	100	100	100	100
		MilliQ (mL)	20	5	20	10	10	10	20	20	20	-
		Total (mL)	320	305	320	160	160	160	320	320	320	320
		Tissue weight / Extraction solvent (mg/mL or nL/mL)	15.625	16.3934	12.5	25	31.25	31.25	7.8125	15.625	28.125	62.5
	Injection volume (mL)	Negative	2	0.5	2	2	2	2	2	2	2	2
		Positive	1	0.5	1	1	1	1	1	1	0.5	2
	Injected tissue weight (mg or nL)	Negative	31.25	8.19672	25	50	62.5	62.5	15.625	31.25	56.25	125
		Positive	15.625	8.19672	12.5	25	31.25	31.25	7.8125	15.625	14.0625	125

## Sheet: Liver
																					Mouse_Liver_WT_N_F1	Mouse_Liver_WT_N_F1	Mouse_Liver_WT_N_F1	Mouse_Liver_WT_N_F1	Mouse_Liver_WT_N_F1AA	Mouse_Liver_WT_N_F1AA	Mouse_Liver_WT_N_F1AA	Mouse_Liver_WT_N_F1AA	Mouse_Liver_WT_N_F1EPA	Mouse_Liver_WT_N_F1EPA	Mouse_Liver_WT_N_F1EPA	Mouse_Liver_WT_N_F1EPA	Mouse_Liver_WT_N_F1DHA	Mouse_Liver_WT_N_F1DHA	Mouse_Liver_WT_N_F1DHA	Mouse_Liver_WT_N_F1DHA
Lipid super class	Lipid class	Total chain	SN1 chain	SN2 chain	SN3 chain	Name	Formula	Representative InChIKey	Representative SMILES	RT[min]	m/z	Adduct	Average intensity	MSMS	Saturated	Mono unsaturated	Arachidonic acid	Eicosapentaenoic acid	Docosapentaenoic acid	PUFAs	160824_Liver_normal_Neg_01	160824_Liver_normal_Neg_02	160824_Liver_normal_Neg_04	160824_Liver_normal_Neg_05	160824_Liver_AA_Neg_16	160824_Liver_AA_Neg_17	160824_Liver_AA_Neg_19	160824_Liver_AA_Neg_20	160824_Liver_EPA_Neg_06	160824_Liver_EPA_Neg_07	160824_Liver_EPA_Neg_09	160824_Liver_EPA_Neg_10	160824_Liver_DHA_Neg_11	160824_Liver_DHA_Neg_12	160824_Liver_DHA_Neg_14	160824_Liver_DHA_Neg_15	Q-values (Control vs ARA)	Q-values (Control vs EPA)	Q-values (Control vs DHA)	Q-values (ARA vs EPA)	Q-values (ARA vs DHA)	Q-values (EPA vs DHA)
Acyl carnitine	ACar	16:0	16:0			ACar 16:0	C23H46NO4	XOMRRQXKHMYMOC-UHFFFAOYNA-O	CCCCCCCCCCCCCCCC(=O)OC(CC(O)=O)C[N+](C)(C)C	6.0678	400.341	[M]+	884	85.02547:82 119.04295:10 400.33292:31	TRUE	FALSE	FALSE	FALSE	FALSE	FALSE	618.5	480.188	513.75	1024.44	408.25	786.188	856.5	782.688	462.75	1277.5	612.25	1436.19	963.5	1056.81	1614.81	1248.62	0.770581	0.329385	0.0258708	0.395901	0.0270433	0.366771
Acyl carnitine	ACar	18:1	18:1			ACar 18:1	C25H48NO4	HOAMADDCQBUDDY-KHPPLWFENA-O	CCCCCC\C=C/CCCCCCCCCC(=O)OC(CC(O)=O)C[N+](C)(C)C	6.21344	426.358	[M]+	718	81.07362:10 85.02448:41 426.35495:31	FALSE	TRUE	FALSE	FALSE	FALSE	FALSE	991	373.938	538.562	2023.25	313.812	398.625	635.5	534.188	397.375	1025.69	395.438	715.875	621.125	582.562	1277.5	667.688	0.263062	0.418045	0.648641	0.366134	0.127524	0.516764
Phospholipid	BMP	44:12	22:6	22:6		BMP 22:6-22:6	C50H75O10P	FMHFZIDTIQEZJJ-GZSOIYOPNA-N	CC\C=C/C\C=C/C\C=C/C\C=C/C\C=C/C\C=C/CCC(=O)OC(CO)COP(O)(=O)OCC(CO)OC(=O)CC\C=C/C\C=C/C\C=C/C\C=C/C\C=C/C\C=C/CC	7.83351	884.543	[M+NH4]+	1355	79.04853:41 81.07214:31 83.0866:10 91.05207:61 93.07453:41 95.08069:31 105.06612:31 107.08594:41 119.07846:31 129.06526:41 133.1019:41 135.11484:31 157.10788:10 159.11081:41 161.12642:41 167.08517:10 173.13171:31 181.10201:31 183.11067:31 185.1304:51 185.15344:10 199.15445:31 291.21637:10 311.23685:20 327.23297:10 384.07196:20 384.08578:31 385.27292:2766 386.26776:82 665.13574:10 695.48651:41	FALSE	FALSE	FALSE	FALSE	TRUE	TRUE	296.562	176.625	243.438	380.562	56.5625	63.1875	134.812	130.5	1042.12	1599.06	1031.25	1277.88	4141.69	3686.62	3842.12	3575.06	0.0099504	0.0004656	2e-07	0.0028755	5.39e-05	7.6e-06
Cholesterol ester	CE	16:1	16:1			CE 16:1	C43H74O2	HODJWNWCVNUPAQ-XDOSKZMUSA-N	CCCCCC\C=C/CCCCCCCC(=O)O[C@H]1CC[C@]2(C)[C@H]3CC[C@]4(C)[C@H](CC[C@H]4[C@@H]3CC=C2C1)[C@H](C)CCCC(C)C	14.4488	640.6	[M+NH4]+	1630	78.95501:10 83.08328:31 97.10324:10 105.0291:10 123.11726:10 135.1171:20 147.12158:20 159.11679:10 161.13243:41 175.15622:10 179.17307:10 186.99979:41 201.16719:20 207.20921:10 215.18903:10 226.98843:102 229.20451:20 233.21841:10 237.07596:10 245.21063:10 255.24893:10 257.22736:31 259.2475:10 268.97821:20 269.03836:31 285.2623:10 343.92099:10 369.35712:143 384.88876:10 391.00238:31	FALSE	TRUE	FALSE	FALSE	FALSE	FALSE	3082.75	1046.44	2729.44	3460.5	784.25	867.188	1073.31	2131.25	886.5	2012.38	1135.44	1444.38	1291.5	1684.5	940.5	1513.44	0.0688034	0.0841262	0.0703178	0.707185	0.696615	0.967957
Cholesterol ester	CE	18:1	18:1			CE 18:1	C45H78O2	RJECHNNFRHZQKU-RMUVNZEASA-N	CCCCCCCC\C=C/CCCCCCCC(=O)O[C@H]1CC[C@]2(C)[C@H]3CC[C@]4(C)[C@H](CC[C@H]4[C@@H]3CC=C2C1)[C@H](C)CCCC(C)C	14.8575	668.63	[M+NH4]+	5726	81.06982:31 95.07814:20 95.08639:20 109.09569:20 133.10693:10 135.11169:31 147.11935:61 161.1283:61 173.14293:10 175.14815:71 187.15161:10 189.16434:61 193.20445:10 201.17252:20 203.17863:41 215.18211:51 217.20267:41 219.21178:41 227.0047:10 229.19095:31 233.22412:41 241.19:10 243.21007:71 245.2231:31 257.22202:41 257.24463:10 273.26349:41 285.24951:10 287.27139:61 327.30923:10 362.9173:10 369.35…	FALSE	TRUE	FALSE	FALSE	FALSE	FALSE	8912.69	6056.31	7754.25	12179	2731.94	3074.06	4937.5	6550.88	3169.38	7014.81	4163.06	4240.5	4951.12	7302.75	3794.81	4787.5	0.0307823	0.0375386	0.0563335	0.798535	0.473064	0.631
Cholesterol ester	CE	18:2	18:2			CE 18:2	C45H76O2	NAACPBBQTFFYQB-LJAITQKLSA-N	CCCCC\C=C/C\C=C/CCCCCCCC(=O)O[C@H]1CC[C@]2(C)[C@H]3CC[C@]4(C)[C@H](CC[C@H]4[C@@H]3CC=C2C1)[C@H](C)CCCC(C)C	14.5329	666.616	[M+NH4]+	8255	81.07005:41 95.0839:71 97.10036:41 105.07237:51 109.1004:92 109.10925:20 119.08202:20 121.10126:51 123.114:51 131.08519:20 135.11697:71 137.12849:20 147.10947:41 147.11803:133 149.13049:31 159.12553:10 161.13049:214 163.14619:51 165.16718:41 175.13925:31 175.15231:122 177.16724:41 179.18045:41 179.19179:20 189.15898:71 193.18335:20 201.155:20 201.16301:71 203.17912:71 213.16121:10 215.1785:92 217…	FALSE	FALSE	FALSE	FALSE	FALSE	TRUE	9925.81	7959.88	9486.19	11101.8	4230.31	4933.75	6437.12	8334.31	7429.94	9175	5795.62	6661.06	11964.1	12530.6	8629.75	7478.5	0.0173792	0.0512421	0.716581	0.311029	0.0349812	0.0905275
Cholesterol ester	CE	19:0	19:0			CE 19:0	C46H82O2	VHYWECIJXTVRSG-KTVMSTBUSA-N	CCCCCCCCCCCCCCCCCCC(=O)O[C@H]1CC[C@]2(C)[C@H]3CC[C@]4(C)C(CC[C@H]4[C@@H]3CC=C2C1)[C@H](C)CCCC(C)C	15.5552	684.665	[M+NH4]+	8824	81.06592:20 83.08416:25 93.07467:5 95.08495:46 97.10419:20 105.0677:25 107.08315:15 107.0963:5 109.10302:36 111.11497:20 119.09246:31 121.10869:5 131.08484:5 133.10857:5 135.1199:61 137.13972:25 147.10912:25 147.11426:51 149.13016:25 155.99413:5 161.13194:87 165.16139:10 175.15012:102 177.18192:5 179.18388:25 189.15671:25 189.16252:51 191.18602:5 199.14465:5 201.16266:46 203.16873:20 203.1808:71 …	TRUE	FALSE	FALSE	FALSE	FALSE	FALSE	8344.38	6595.19	10401	7261.5	6241.31	5552.12	9783.5	11120.7	7246.38	11732.9	9285.94	10051.1	9472.12	11773.1	10692.8	5624.88	0.988472	0.296071	0.461736	0.424581	0.546268	0.911871
Cholesterol ester	CE	20:4	20:4			CE 20:4	C47H76O2	IMXSFYNMSOULQS-BEDFLICRSA-N	CCCCC\C=C/C\C=C/C\C=C/C\C=C/CCCC(=O)O[C@H]1CC[C@]2(C)[C@H]3CC[C@]4(C)[C@H](CC[C@H]4[C@@H]3CC=C2C1)[C@H](C)CCCC(C)C	14.398	690.615	[M+NH4]+	4560	79.05745:10 81.0672:41 93.06789:51 93.07878:10 95.08498:82 97.10701:51 103.2262:10 107.08174:31 109.10159:92 111.11354:61 111.12991:10 121.10565:41 123.1153:41 133.09888:20 135.12:92 137.1299:31 143.9249:10 147.10922:41 147.11778:153 149.13026:51 151.14255:31 161.13028:153 163.14598:41 165.16335:31 173.13202:51 175.14839:122 179.17838:61 187.14804:41 189.16464:102 193.19299:51 203.17296:71 203.18…	FALSE	FALSE	TRUE	FALSE	FALSE	TRUE	4236.31	3232.69	3662.25	5504.75	9422.38	11822.9	13973.7	13370.2	1017.62	1231.06	967.688	1373	1012.88	862.5	772.938	496.625	0.0003986	0.0075795	0.0051042	0.0015757	0.0014009	0.0458683
Cholesterol ester	CE	20:5	20:5			CE 20:5	C47H74O2	XZFUGMCJZFRBKF-BDJFIEMMSA-N	CC\C=C/C\C=C/C\C=C/C\C=C/C\C=C/CCCC(=O)O[C@H]1CC[C@]2(C)[C@H]3CC[C@]4(C)[C@H](CC[C@H]4[C@@H]3CC=C2C1)[C@H](C)CCCC(C)C	14.1524	688.604	[M+NH4]+	1558	79.05527:10 93.06821:10 95.0853:41 107.0835:20 109.09747:31 116.06979:10 121.09816:10 135.11368:31 145.0937:10 147.11971:51 147.57355:10 149.13391:61 161.12866:102 163.15697:10 175.14667:92 177.16718:31 179.18039:31 187.15393:31 189.16861:51 203.17905:41 207.21707:10 215.1846:71 219.2122:31 221.22217:10 231.21001:10 235.24353:20 243.21492:51 245.23018:20 257.22473:31 259.2403:71 273.26395:31 287.…	FALSE	FALSE	FALSE	TRUE	FALSE	TRUE	220.938	195.25	218.438	216	55.125	92.8125	68	58.8125	4874.5	5909.38	4075.31	4896.44	902.25	1187.25	777.5	1176.75	8.5e-06	0.0010806	0.0042641	0.0009866	0.0025658	5.5e-05
Cholesterol ester	CE	22:6	22:6			CE 22:6	C49H76O2	VOEVEGPMRIYYKC-HNJOWPRISA-N	CC\C=C/C\C=C/C\C=C/C\C=C/C\C=C/C\C=C/CCC(=O)O[C@H]1CC[C@]2(C)[C@H]3CC[C@]4(C)[C@H](CC[C@H]4[C@@H]3CC=C2C1)[C@H](C)CCCC(C)C	14.3041	714.621	[M+NH4]+	2993	81.06764:41 95.08407:61 107.08368:31 107.09536:10 109.10355:61 119.08532:41 123.11423:41 133.10101:31 135.11394:71 137.14859:10 147.11659:82 149.14285:10 161.1344:143 163.14832:41 165.16931:10 173.13814:10 175.14894:102 177.16383:51 179.17892:82 184.97389:10 189.15938:71 191.19455:10 193.21512:10 201.15741:51 201.17543:20 203.17552:82 205.19562:20 207.20947:31 215.18307:71 217.19116:82 217.21196:…	FALSE	FALSE	FALSE	FALSE	TRUE	TRUE	1270.62	1580.56	2563.31	2425.94	1029.5	1157.94	1446.25	1684	1599.25	1350.19	1967.69	3814.19	6882.19	6173.12	5433.06	7511.5	0.120487	0.740394	0.000169	0.189856	3.44e-05	0.0009416
Ceramide	Cer-NS	d39:1	d17:1	22:0		Cer-NS d17:1/22:0	C39H77NO3	NHEGYDMEFDPAEY-NWBJSICCNA-N	CCCCCCCCCCCCCCCCCCCCCC(=O)NC(CO)C(O)\C=C\CCCCCCCCCCCC	12.9035	666.599	[M+Hac-H]-	1014	223.19563:25 237.21655:15 247.94696:5 249.22614:36 254.24078:20 257.01334:5 286.97205:5 300.95407:5 321.31268:92 338.34189:51 350.33853:46 364.35721:199 366.33951:10 378.36539:10 380.34686:46 558.55078:46 574.56384:36 576.56104:56 606.58405:513	TRUE	FALSE	FALSE	FALSE	FALSE	FALSE	864.938	341.188	624.562	488.625	838.5	1131.62	1347.25	1344.69	813.938	1035.56	1262.5	1336.94	1034.12	1170.56	1138.19	1444.31	0.0116896	0.0168572	0.0047759	0.762703	0.840264	0.58636
Ceramide	Cer-NS	d41:2	d17:1	24:1		Cer-NS d17:1/24:1	C41H79NO3	KZTBXGOBTULOIO-SZHIUZGGNA-N	CCCCCCCCCCCC\C=C/CCCCCCCCCC(=O)NC(CO)C(O)\C=C\CCCCCCCCCCCC	13.0881	692.618	[M+Hac-H]-	1317	201.02519:20 221.21149:10 223.20753:41 237.22443:31 249.22527:31 347.31711:20 347.33813:41 351.32028:20 364.35306:51 371.02231:10 376.36023:51 390.37201:133 584.5683:31 596.88654:10 600.56354:31 602.55341:31 602.58112:41 632.58752:465	FALSE	TRUE	FALSE	FALSE	FALSE	FALSE	1308.62	2036.75	1673.31	758.312	830.688	919.75	965.938	1277	1088.75	1811.62	1396.12	1285.38	1270.81	1367.31	1387.62	1692.12	0.17437	0.881071	0.960672	0.0704707	0.0177359	0.854618
Ceramide	Cer-NS	d41:2	d17:1	24:1		Cer-NS d17:1/24:1	C41H79NO3	KZTBXGOBTULOIO-SZHIUZGGNA-N	CCCCCCCCCCCC\C=C/CCCCCCCCCC(=O)NC(CO)C(O)\C=C\CCCCCCCCCCCC	12.9415	692.62	[M+Hac-H]-	858	201.0275:31 223.20366:41 249.22343:61 261.22379:20 345.04419:10 347.32822:51 364.33752:31 364.35638:51 365.3428:61 376.34991:51 383.00885:10 390.34479:31 390.37546:153 406.37094:41 584.57275:51 596.54645:10 600.57153:61 600.60956:20 602.57184:51 602.59265:51 616.94751:10 632.59937:382	FALSE	TRUE	FALSE	FALSE	FALSE	FALSE	995	545.188	718.125	585.188	482.438	660.438	837.062	1126.81	891.688	1005	998.125	703.5	889	927.062	1311.5	1047.69	0.713402	0.177723	0.0541887	0.456096	0.161306	0.26936
Ceramide	Cer-NS	d30:1	d18:1	12:0		Cer-NS d18:1/12:0	C30H59NO3	HXFPPRPLRSPNIB-WJTDDFOZNA-N	CCCCCCCCCCCCC\C=C\C(O)C(CO)NC(=O)CCCCCCCCCCC	8.44944	540.461	[M+Hac-H]-	33459	176.98383:10 181.16037:760 197.19276:143 198.18669:581 199.16719:319 223.49026:20 224.20381:2617 235.19696:51 237.22021:721 238.1774:42 239.2347:62 240.19374:365 250.2511:61 255.23088:31 263.2319:516 266.24167:143 268.26462:173 298.27618:51 393.39969:10 414.41068:10 432.37546:31 432.41653:367 444.41998:31 448.41183:388 450.42194:566 462.43433:41 480.43848:2821 481.43796:33	TRUE	FALSE	FALSE	FALSE	FALSE	FALSE	28924.1	26835.3	34139.5	30839.6	24177.2	29740.6	33548.3	34379.1	38377	39342.2	34611.6	40865.6	30285.1	33231.4	36628.8	39420.4	0.924389	0.0073746	0.111355	0.0264607	0.197894	0.204493
Ceramide	Cer-NS	d34:1	d18:1	16:0		Cer-NS d18:1/16:0	C34H67NO3	YDNKGFDKKRUKPY-ORIPQNMZNA-N	CCCCCCCCCCCCCCCC(=O)NC(CO)C(O)\C=C\CCCCCCCCCCCCC	9.78493	596.521	[M+Hac-H]-	2884	235.21704:10 237.22084:214 254.25424:71 255.23839:41 263.23956:92 266.25171:31 268.25851:31 279.39301:21 280.2616:405 296.25806:61 488.48474:71 504.47443:61 506.49521:102 518.5152:10 536.47113:52 536.50055:587	TRUE	FALSE	FALSE	FALSE	FALSE	FALSE	2687.38	4738.25	3293.69	2157.88	1726.19	2378.12	2545.56	3080.44	3393.94	3000.44	3046.5	3605	2446.94	2550	2401.69	3093.19	0.253484	0.943951	0.34307	0.0386208	0.575443	0.0251006
Ceramide	Cer-NS	d40:1	d18:1	22:0		Cer-NS d18:1/22:0	C40H79NO3	KEPQASGDXIEOIL-LAPDZXRHNA-N	CCCCCCCCCCCCCCCCCCCCCC(=O)NC(CO)C(O)\C=C\CCCCCCCCCCCCC	13.087	680.616	[M+Hac-H]-	27907	209.18919:31 235.1996:71 237.22289:1490 239.23083:61 249.22371:41 250.24274:61 255.22922:41 262.25363:31 263.23712:1377 266.24231:194 268.26297:275 281.24728:41 298.27945:143 319.30234:41 320.30408:33 321.31497:1974 335.31183:31 335.32733:31 337.29651:31 337.34833:237 338.34424:1793 338.88171:22 339.32602:1096 349.35385:20 352.35361:61 353.33957:31 362.33704:51 363.19974:31 364.35962:7390 365.308…	TRUE	FALSE	FALSE	FALSE	FALSE	FALSE	20871.2	16209.6	25136.2	16990.4	25836.2	35571.3	30847.2	32715.7	16938.1	26856.8	32496.6	42439.7	25892.5	31545.6	25414.6	40754.1	0.0075432	0.134364	0.0356653	0.793909	0.936635	0.855557
Ceramide	Cer-NS	d41:1	d18:1	23:0		Cer-NS d18:1/23:0	C41H81NO3	NAJHAHQNQCNWOP-JMUUFCRMNA-N	CCCCCCCCCCCCCCCCCCCCCCC(=O)NC(CO)C(O)\C=C\CCCCCCCCCCCCC	13.2054	694.63	[M+Hac-H]-	9055	80.02379:2 95.04758:2 95.0517:3 124.44213:1 141.01663:4 173.01207:2 175.11563:2 194.03557:2 201.0157:2 203.01918:10 207.20418:2 209.18921:6 217.00563:21 219.21449:2 221.22043:4 223.20598:55 225.22159:7 235.20604:13 236.2394:7 237.22067:323 238.21922:2 239.23734:17 240.9558:2 246.97229:2 249.22365:47 250.25159:23 251.23468:5 252.22867:13 254.24725:13 255.22914:7 262.93262:3 263.23932:234 264.22922…	TRUE	FALSE	FALSE	FALSE	FALSE	FALSE	6766.25	8504.81	9092.19	6478	6610.56	8813.88	7888.62	9754.69	8258.19	10412.1	10566	9163	9772	9488.12	10916.8	12388.1	0.570858	0.0663021	0.0189607	0.174369	0.0449921	0.269519
Ceramide	Cer-NS	d42:1	d18:1	24:0		Cer-NS d18:1/24:0	C42H83NO3	ZJVVOYPTFQEGPH-MHAUTQJVNA-N	CCCCCCCCCCCCCCCCCCCCCCCC(=O)NC(CO)C(O)\C=C\CCCCCCCCCCCCC	13.3119	708.646	[M+Hac-H]-	43803	92.09814:10 217.00134:204 235.20804:71 237.22049:2313 239.23279:134 249.21901:31 250.25586:143 255.23119:61 263.23682:1819 266.23279:62 266.24661:374 268.26263:412 278.25208:31 281.24216:92 295.26492:10 298.27414:153 347.33334:51 349.34796:2746 351.35779:41 365.37503:255 366.18729:22 366.37363:2041 367.35468:1455 380.37332:61 385.60602:31 390.36414:41 392.10565:31 392.38791:10464 393.37796:31 406…	TRUE	FALSE	FALSE	FALSE	FALSE	FALSE	31279.2	47783.4	47991.9	29087.6	29153.6	45843.4	35087.9	50237.1	39492.5	47360.1	50015.4	59159.6	40509.6	48418.1	44451.9	54973.8	0.887037	0.178158	0.22718	0.207005	0.267657	0.719453
Ceramide	Cer-NS	d42:2	d18:1	24:1		Cer-NS d18:1/24:1	C42H81NO3	FUWLDBVRSLAFFJ-DBOQMASJNA-N	CCCCCCCCCCCCC\C=C\C(O)C(CO)NC(=O)CCCCCCCCC\C=C/CCCCCCCCCCCC	13.09	706.631	[M+Hac-H]-	20961	235.20436:51 237.21898:929 239.2291:73 250.2588:82 263.23758:711 266.24969:153 268.26343:214 281.24063:31 298.27017:102 338.34473:31 346.24139:43 347.32919:963 363.3508:61 363.37231:72 364.35474:913 365.33844:714 378.36285:31 389.1481:36 390.37378:4488 392.37802:51 401.01965:10 404.36646:51 406.36359:633 408.36847:31 572.57355:31 588.58978:31 598.60034:523 610.59753:41 614.58929:486 616.59875:120…	FALSE	TRUE	FALSE	FALSE	FALSE	FALSE	22805.8	29588.9	28669	20110.2	13109.8	15992.2	14650.4	20162.4	15249.4	26388.6	20686.6	17634.7	19641.1	21915.1	23828.1	24938.5	0.0146074	0.161377	0.331359	0.207869	0.0134726	0.369603
Ceramide	Cer-NS	d43:1	d18:1	25:0		Cer-NS d18:1/25:0	C43H85NO3	QHPYSHVSWAOLHS-BSKJHSHCNA-N	CCCCCCCCCCCCCCCCCCCCCCCCC(=O)NC(CO)C(O)\C=C\CCCCCCCCCCCCC	13.4234	722.663	[M+Hac-H]-	45681	80.02602:31 95.05141:31 235.21219:52 236.46463:21 237.22249:2192 239.23697:92 250.25346:143 253.21751:31 255.22878:41 262.41315:32 263.23895:1898 266.25107:289 268.26712:307 281.23969:82 298.2692:102 361.34329:31 363.36041:2479 365.38315:43 379.39709:194 380.38989:2470 381.37024:1418 394.39737:61 404.38791:61 405.12598:61 405.40436:37 406.23151:41 406.40784:9781 407.36987:38 420.37576:51 421.3802…	TRUE	FALSE	FALSE	FALSE	FALSE	FALSE	45903.1	39218.4	47872	46505.2	36395.7	48480.8	47855.6	46220.9	40251.8	47477.1	47217.6	50055.8	41090.4	45532.9	50014.5	50805.6	0.969453	0.64658	0.527418	0.682198	0.577632	0.849234
Glycerolipid	DAG	32:1	16:0	16:1		DAG 16:0-16:1	C35H66O5	ADLOEVQMJKYKSR-PEZBUJJGNA-N	CCCCCCCCCCCCCCCC(=O)OCC(CO)OC(=O)CCCCCCC\C=C/CCCCCC	10.6722	584.526	[M+NH4]+	1328	71.08517:10 95.08374:20 244.93182:10 278.89941:10 285.24268:31 302.95929:10 311.25436:51 311.26932:31 313.27383:71 334.87775:10 339.29172:20 549.48779:92	TRUE	TRUE	FALSE	FALSE	FALSE	FALSE	2430.31	1627.25	2127.81	1587.31	825.938	1226.75	1071.88	1498.81	891.75	982.5	808.188	1366.12	1738.19	1067	909.562	1093.62	0.0191171	0.0078853	0.03535	0.471964	0.848065	0.422751
Glycerolipid	DAG	34:1	16:0	18:1		DAG 16:0-18:1	C37H70O5	YEJYLHKQOBOSCP-ZCXUNETKNA-N	CCCCCCCCCCCCCCCC(=O)OCC(CO)OC(=O)CCCCCCC\C=C/CCCCCCCC	12.0234	612.555	[M+NH4]+	6588	71.08354:11 79.05465:3 81.06818:8 83.08259:10 85.1022:6 95.07779:4 95.08467:16 97.09975:6 107.09017:3 109.09978:9 111.08049:3 111.11618:5 121.09909:10 123.11182:7 125.13323:2 127.14725:1 128.94974:5 133.08061:1 135.11635:4 137.13449:4 149.13161:3 163.14198:2 165.16293:3 177.15912:4 190.07928:1 191.18576:2 197.01573:2 202.92924:1 218.95279:2 221.228:5 224.03206:1 239.09111:3 239.2373:12 241.08925:…	TRUE	TRUE	FALSE	FALSE	FALSE	FALSE	10332.6	8572.94	7462	7745.44	3862.12	5551.62	6017.06	6922.25	5131.56	5503	3364.06	6155.31	10487.9	6765	5706.44	5824.38	0.0179467	0.0073859	0.343309	0.553616	0.260163	0.140644
Glycerolipid	DAG	34:2	16:0	18:2		DAG 16:0-18:2	C37H68O5	SVXWJFFKLMLOHO-BCTRXSSUNA-N	CCCCCCCCCCCCCCCC(=O)OCC(CO)OC(=O)CCCCCCC\C=C/C\C=C/CCCCC	11.0206	610.539	[M+NH4]+	12710	71.08622:20 73.04445:3 77.05188:1 79.05244:13 81.07102:59 83.08418:30 85.06216:3 85.09991:21 89.05864:5 91.05223:8 93.06654:15 95.08498:62 97.05975:2 97.09867:23 99.08009:7 99.11379:3 105.07063:6 107.08319:10 109.10158:36 111.07784:5 111.11651:6 113.13186:3 119.08327:10 121.09942:20 123.11684:21 125.08622:2 125.12883:3 127.14439:1 133.10048:12 135.11339:13 137.09846:2 137.13316:12 139.11133:3 147…	TRUE	FALSE	FALSE	FALSE	FALSE	TRUE	15425.3	13825.6	12617.9	9373.38	8736.94	9395.69	14946.2	13129.8	8729.62	9186.25	7220	15008.8	21374	15035.6	11222.6	18135.7	0.545437	0.241882	0.199468	0.52855	0.112333	0.0594651
Glycerolipid	DAG	36:4	16:0	20:4		DAG 16:0-20:4	C39H68O5	GYMMHHODMBOFGD-JAXHXWBXNA-N	CCCCCCCCCCCCCCCC(=O)OCC(CO)OC(=O)CCCCCC\C=C/C\C=C/C\C=C/C\C=C/CC	10.9245	634.538	[M+NH4]+	1503	81.06702:20 85.06197:20 91.05608:31 95.08617:31 97.09988:31 113.09567:10 119.07848:31 175.14633:20 185.13437:31 203.17879:82 257.25406:10 269.22543:51 287.23364:41 313.26663:307 361.26974:51 599.49603:41 617.52045:31	TRUE	FALSE	TRUE	FALSE	FALSE	TRUE	1624.44	2482.56	1182.88	1219.75	2742.5	3569.31	3457.75	4528.06	349	572.812	296.938	406.5	551.812	439.062	315.938	313.812	0.0063798	0.0249121	0.0250416	0.0027785	0.0028166	0.989289
Glycerolipid	DAG	38:6	16:0	22:6		DAG 16:0-22:6	C41H68O5	BXVYQJJBMVVALQ-LGFBOSHVNA-N	CCCCCCCCCCCCCCCC(=O)OCC(CO)OC(=O)CC\C=C/C\C=C/C\C=C/C\C=C/C\C=C/C\C=C/CC	10.7152	658.539	[M+NH4]+	2789	81.07718:10 85.10621:20 131.08466:10 133.08397:20 254.91699:10 313.27377:112 371.23795:10 385.28128:41 574.79272:10 589.45386:31 589.4881:61 623.52246:10 641.51227:20 658.51184:31	TRUE	FALSE	FALSE	FALSE	TRUE	TRUE	1969.12	2325.94	1364.69	1108.19	1037.38	1450.06	1280.5	1367.88	1537.06	2580.31	1435.94	1860.88	8254.12	7286.56	5179.81	4578.44	0.211582	0.685259	0.0022399	0.082519	0.0096825	0.0025911
Glycerolipid	DAG	34:3	16:1	18:2		DAG 16:1-18:2	C37H66O5	BHGPPCIWDXQOMA-RUGCENDANA-N	CCCCCC\C=C/CCCCCCCC(=O)OCC(CO)OC(=O)CCCCCCC\C=C/C\C=C/CCCCC	10.0765	608.522	[M+NH4]+	1756	77.03592:1 79.05635:4 81.0699:6 83.08176:3 87.0649:1 91.04702:1 93.06671:4 95.08379:6 97.0655:3 104.99565:1 109.09885:3 119.08968:2 121.10123:5 127.11444:1 128.95836:2 133.66945:1 135.10876:3 137.14172:2 147.11464:2 157.10313:1 163.14087:3 175.14311:2 178.96347:2 186.99593:2 202.97627:1 215.17668:1 220.9771:2 226.98854:2 234.93248:1 237.21298:3 244.92809:2 245.22185:2 263.22238:2 263.24527:6 268.…	FALSE	TRUE	FALSE	FALSE	FALSE	TRUE	4177.06	1587	2262.06	2349.88	1111.12	1440.19	2220.19	2657.44	1145.38	1163.5	977.312	1070.38	1788.81	1115.62	1475.12	1553.69	0.305523	0.0724951	0.136999	0.117608	0.363552	0.0354107
Glycerolipid	DAG	36:1	18:0	18:1		DAG 18:0-18:1	C39H74O5	SAEPUUXWQQNLGN-ZZEZOPTANA-N	CCCCCCCCCCCCCCCCCC(=O)OCC(CO)OC(=O)CCCCCCC\C=C/CCCCCCCC	13.0414	640.587	[M+NH4]+	1119	71.08615:10 265.25378:20 339.29724:71 341.30133:71 603.71069:10 605.53894:51 605.55286:61 640.58759:10	TRUE	TRUE	FALSE	FALSE	FALSE	FALSE	1320.31	1140.25	1353.75	1210.06	583.875	1116.31	1489.19	1526.06	771.188	994.062	639.062	1103.94	1347.75	1171.69	1133.69	1007.88	0.75141	0.0172482	0.330375	0.260352	0.954705	0.0630089
Glycerolipid	DAG	38:4	18:0	20:4		DAG 18:0-20:4	C41H72O5	BRKLTVAHEPCGNK-ZKVKLVECNA-N	CCCCCCCCCCCCCCCCCC(=O)OCC(CO)OC(=O)CCCCCC\C=C/C\C=C/C\C=C/C\C=C/CC	12.3899	662.575	[M+NH4]+	991	71.08636:3 79.05511:4 81.06865:4 83.08693:4 85.06494:2 91.05511:5 93.06945:4 95.08518:5 97.09748:3 103.08025:1 105.06651:6 109.09886:3 111.12418:2 119.08044:4 121.09968:2 123.11553:2 128.95035:6 129.05931:2 131.08032:2 133.09914:3 137.13676:2 145.09885:4 147.11292:3 149.12881:2 151.15495:1 161.09296:2 161.13593:2 163.14447:2 167.13683:1 171.1147:4 173.12303:2 173.13789:5 175.14682:4 177.16547:3 1…	TRUE	FALSE	TRUE	FALSE	FALSE	TRUE	1084.44	1151.31	1308.5	1175.5	1078.5	1529.56	1372.31	1952.94	779.625	650.188	579.25	627.812	756.625	778.688	559.438	468.125	0.158213	0.000178	0.0009241	0.0174629	0.0052754	0.838643
Glycerolipid	DAG	36:2	18:1	18:1		DAG 18:1-18:1	C39H72O5	AFSHUZFNMVJNKX-CLFAGFIQNA-N	CCCCCCCC\C=C/CCCCCCCC(=O)OCC(CO)OC(=O)CCCCCCC\C=C/CCCCCCCC	12.2472	638.571	[M+NH4]+	1869	77.99969:1 79.05241:3 81.06844:7 83.08543:6 93.06785:5 95.08493:10 97.1014:6 99.08424:2 107.08752:4 109.103:5 111.11495:3 121.09779:7 127.1141:1 128.9548:4 135.11659:5 149.13356:4 151.15453:2 163.15662:1 167.14548:2 175.14819:1 177.16872:2 199.17047:1 209.18536:2 245.2299:1 247.23573:7 260.91467:2 265.25125:14 271.24304:1 302.92978:2 337.26764:2 338.2348:3 339.28909:188 341.29315:2 603.5296:79 62…	FALSE	TRUE	FALSE	FALSE	FALSE	FALSE	3565.75	1596.19	3636.25	3231.88	987.812	1168.75	2413.31	2058.94	1176.56	1255.25	604.125	1354.56	2136.81	1345.81	1649.19	1724.25	0.0618635	0.0093556	0.0430086	0.194324	0.886235	0.0390729
Glycerolipid	DAG	36:3	18:1	18:2		DAG 18:1-18:2	C39H70O5	BLZVZPYMHLXLHG-RQOIEFAZNA-N	CCCCCCCC\C=C/CCCCCCCC(=O)OCC(CO)OC(=O)CCCCCCC\C=C/C\C=C/CCCCC	11.1883	636.554	[M+NH4]+	4981	80.06042:5 81.06973:20 93.07194:10 95.08495:31 105.07059:5 109.10154:15 113.0943:5 121.09937:20 135.11499:20 247.24693:20 263.24225:20 265.26285:20 333.33829:5 337.27039:245 339.29187:178 601.50397:87 619.51971:10	FALSE	TRUE	FALSE	FALSE	FALSE	TRUE	8497.75	3462.38	7470.44	7240.62	2699.25	3000.06	7987.81	7181.81	2665.88	3031.38	1550.62	3886.94	6515.56	3765.44	4714.62	6020.56	0.442617	0.0180288	0.307391	0.146769	0.98138	0.0204536
Glycerolipid	DAG	38:5	18:1	20:4		DAG 18:1-20:4	C41H70O5	CDIDDLXSXXDECX-HAGCXRLMNA-N	CCCCCCCC\C=C/CCCCCCCC(=O)OCC(CO)OC(=O)CCCCCC\C=C/C\C=C/C\C=C/C\C=C/CC	11.0551	660.555	[M+NH4]+	1133	81.07106:15 93.06657:8 95.08365:13 97.09593:5 105.07501:3 109.1031:10 119.08485:10 132.04135:3 145.10197:5 147.12463:3 156.08412:3 171.11253:8 175.1465:10 183.17204:3 185.13454:13 189.17041:8 203.17491:18 215.18037:8 245.24341:3 265.24921:5 269.22086:18 285.25241:3 287.2265:13 313.26163:13 338.23773:3 339.29205:127 357.33029:3 361.27768:25 387.27817:5 622.73029:3 625.49719:15 625.53253:13 643.536…	FALSE	TRUE	TRUE	FALSE	FALSE	TRUE	1053.38	756.812	1169.94	794.938	1122.06	1534.62	3201.5	3088.94	944.625	1359.31	677.812	902.25	415.25	319.812	334.125	456.625	0.0910376	0.880615	0.0017626	0.0611046	0.0395049	0.022467
Glycerolipid	DAG	40:7	18:1	22:6		DAG 18:1-22:6	C43H70O5	ZILMKERHGSKQBG-HILQMKNTNA-N	CCCCCCCC\C=C/CCCCCCCC(=O)OCC(CO)OC(=O)CC\C=C/C\C=C/C\C=C/C\C=C/C\C=C/C\C=C/CC	10.8306	684.553	[M+NH4]+	1853	79.05241:15 81.06846:20 81.07735:5 83.08544:51 88.03104:5 91.05356:25 95.08497:51 97.10004:15 103.80325:5 105.06918:15 107.66067:5 119.08635:15 121.09943:41 125.12884:5 129.06706:10 131.08813:20 135.11833:20 149.12508:25 155.09682:5 161.12846:15 163.14777:15 169.09943:31 171.11624:20 173.13016:15 175.15398:15 181.1004:20 183.10715:15 185.13072:36 187.1461:20 195.16887:5 199.15479:15 201.16084:31 …	FALSE	TRUE	FALSE	FALSE	TRUE	TRUE	612.438	440.438	589.312	505.125	318.125	326.562	801.688	613.688	792.5	933.5	373.375	845.188	6903.31	3584.94	5406.75	6593.12	0.866316	0.177564	0.0065111	0.244071	0.0057956	0.0065276
Glycerolipid	DAG	36:4	18:2	18:2		DAG 18:2-18:2	C39H68O5	MQGBAQLIFKSMEM-MAZCIEHSNA-N	CCCCC\C=C/C\C=C/CCCCCCCC(=O)OCC(CO)OC(=O)CCCCCCC\C=C/C\C=C/CCCCC	10.3472	634.539	[M+NH4]+	2751	95.08526:31 105.07236:10 123.11401:20 261.23212:10 337.25531:51 337.27603:275 338.23026:10 599.47156:20 599.49231:51 617.5061:31	FALSE	FALSE	FALSE	FALSE	FALSE	TRUE	3251.94	1613.44	2470.62	2261.06	2111.19	1623	4977.12	4559.19	1829.06	2089.62	1585.75	2192.19	3630.56	2458.5	3219.88	4135	0.353051	0.239835	0.0970431	0.198581	0.96389	0.0091231
Glycerolipid	DAG	40:8	18:2	22:6		DAG 18:2-22:6	C43H68O5	GPMAAGRGFWBOSO-LNYCXSEGNA-N	CCCCC\C=C/C\C=C/CCCCCCCC(=O)OCC(CO)OC(=O)CC\C=C/C\C=C/C\C=C/C\C=C/C\C=C/C\C=C/CC	10.0534	682.532	[M+NH4]+	2873	79.05359:41 81.06837:143 86.25949:10 91.05213:51 93.07188:51 95.08488:112 97.10275:31 105.06621:41 109.10002:51 117.06412:31 119.08627:31 121.10556:41 123.11364:31 131.09937:10 135.11334:31 141.59677:10 147.11598:41 155.08444:31 159.1199:31 161.13019:31 163.14951:20 169.09937:31 171.1217:51 173.12823:41 175.15205:41 179.13487:10 185.12682:31 185.14793:10 189.12964:31 195.11757:20 196.11804:10 201…	FALSE	FALSE	FALSE	FALSE	TRUE	TRUE	902.625	262.25	635.25	316.625	532.688	701.5	1888.69	1276.81	1217.56	1306.81	554.5	1979.19	8827	3379.69	9610.19	12571.3	0.145898	0.0657837	0.0241137	0.710988	0.0280614	0.0299508
Ether linked phospholipid	EtherPE	36:5e	16:1e	20:4		PE 16:1e/20:4	C41H74NO7P	YATSYZSZUULQDZ-GKPKDRHFNA-N	CCCCCC\C=C/CCCCCCCCOCC(COP(O)(=O)OCCN)OC(=O)CCCCCC\C=C/C\C=C/C\C=C/C\C=C/CC	9.86003	722.506	[M-H]-	1546	78.95841:15 196.0334:25 203.16164:5 205.2:15 239.2325:20 259.24316:61 282.91479:5 303.23364:631 418.25107:20 418.2655:51 432.86539:5 436.28036:163 722.44434:10 722.50879:261	FALSE	FALSE	TRUE	FALSE	FALSE	TRUE	2041.88	2169.06	2683.19	1977.69	1585.56	2508.69	2419.81	2981.44	887.938	887.688	813.438	891	578.312	708.938	781.125	815.812	0.654679	0.0032335	0.0001132	0.0137472	0.0094585	0.0370787
Ether linked phospholipid	EtherPE	36:6e	16:1e	20:5		PE 16:1e/20:5	C41H72NO7P	YMKZESHNWGNAIE-VNTVABMMNA-N	CCCCCC\C=C/CCCCCCCCOCC(COP(O)(=O)OCCN)OC(=O)CCC\C=C/C\C=C/C\C=C/C\C=C/C\C=C/CC	9.36403	720.492	[M-H]-	335	78.95666:6 115.1599:2 140.00719:8 177.09171:4 196.04214:14 203.18057:16 227.1871:2 237.22754:2 239.23985:12 257.22824:59 269.58658:2 283.20282:4 301.21808:313 375.23642:6 418.26898:27 436.2308:4 436.28091:73 660.58466:4 720.48108:153	FALSE	FALSE	FALSE	TRUE	FALSE	TRUE	42.9375	76.625	29	21.3125	7.875	18.0625	16.625	43.3125	916.375	1016.5	979.625	1328.94	70.25	293.875	244.812	252.375	0.195377	0.0013789	0.0360256	0.0014071	0.0281524	0.0001906
Ether linked phospholipid	EtherPE	38:5e	16:1e	22:4		PE 16:1e/22:4	C43H78NO7P	OZSVECGNTALICE-GKPKDRHFNA-N	CCCCCC\C=C/CCCCCCCCOCC(COP(O)(=O)OCCN)OC(=O)CCCCCCCC\C=C/C\C=C/C\C=C/C\C=C/CC	10.5989	750.541	[M-H]-	357	78.95916:10 140.01105:10 196.03136:14 237.2247:3 239.23265:10 287.27982:20 329.24146:7 331.26202:524 416.95767:3 418.26965:37 436.28763:85 456.90869:3 748.20856:3 750.54541:219	FALSE	FALSE	FALSE	FALSE	FALSE	TRUE	479.625	364	452.688	345.062	494.938	968.438	1042.69	1100	64.3125	59	40.25	67.375	28.5	80	72.5	45.75	0.034436	0.0013588	5.47e-05	0.0087495	0.0085124	0.94022
Ether linked phospholipid	EtherPE	38:6e	16:1e	22:5		PE 16:1e/22:5	C43H76NO7P	CWZGHHQNICLNJN-MEQMIZENNA-N	CCCCCC\C=C/CCCCCCCCOCC(COP(O)(=O)OCCN)OC(=O)CCCCC\C=C/C\C=C/C\C=C/C\C=C/C\C=C/CC	9.97013	748.521	[M-H]-	989	281.24948:10 285.24847:51 303.21228:20 303.23438:62 303.25159:10 329.24161:553 416.96634:10 418.26102:51 418.29276:41 436.27286:92 436.2876:82 688.5694:10 748.5282:304	FALSE	FALSE	FALSE	FALSE	FALSE	TRUE	1049.19	727.5	841.25	848.312	435.5	746.938	1172.56	757.125	1716.31	1820.06	1874	1811.88	404.875	455.188	546.5	609.812	0.611596	1.52e-05	0.0042335	0.0052285	0.13367	4e-07
Ether linked phospholipid	EtherPE	38:7e	16:1e	22:6		PE 16:1e/22:6	C43H74NO7P	KGCPGAKRLOCUEV-ZLXBYIIJNA-N	CCCCCC\C=C/CCCCCCCCOCC(COP(O)(=O)OCCN)OC(=O)CC\C=C/C\C=C/C\C=C/C\C=C/C\C=C/C\C=C/CC	9.70797	746.506	[M-H]-	1476	137.12631:10 177.16615:20 191.17657:20 196.03564:71 229.19667:61 239.233:41 249.8255:10 255.20215:21 269.99207:10 283.23843:300 297.2276:10 309.22467:31 326.20724:31 327.23251:725 399.9968:10 418.26715:122 436.27914:353 506.26254:10 746.43451:20 746.45764:115 746.50391:611	FALSE	FALSE	FALSE	FALSE	TRUE	TRUE	976	916.875	1260.31	1094.12	435	600.312	530.562	566.5	912.188	842.562	1022.31	1120.31	2574	3350.81	3376	4036	0.0007352	0.403319	0.0033899	0.0007877	0.0023439	0.0033661
Ether linked phospholipid	EtherPE	38:5e	18:1e	20:4		PE 18:1e/20:4	C43H78NO7P	VLIJZYIABFUKFN-JZELYBSLNA-N	CCCCCCCC\C=C/CCCCCCCCOCC(COP(O)(=O)OCCN)OC(=O)CCCCCC\C=C/C\C=C/C\C=C/C\C=C/CC	10.9288	750.542	[M-H]-	603	196.0432:41 205.19592:41 259.23434:41 267.26974:31 280.96771:10 303.23169:647 446.30011:71 448.91217:10 464.30969:143 748.19696:10 750.5415:291	FALSE	FALSE	TRUE	FALSE	FALSE	TRUE	715.938	633.938	687	427.188	740.875	1312.5	1418.69	1328.44	298.625	298.5	287.062	283.312	211	307.5	353.312	339.75	0.0132002	0.0154403	0.0050428	0.0098583	0.0086512	0.755252
Ether linked phospholipid	EtherPE	40:7e	18:1e	22:6		PE 18:1e/22:6	C45H78NO7P	IVBLZGVNSKPGOR-XAJDCCMMNA-N	CCCCCCCC\C=C/CCCCCCCCOCC(COP(O)(=O)OCCN)OC(=O)CC\C=C/C\C=C/C\C=C/C\C=C/C\C=C/C\C=C/CC	10.7219	774.541	[M-H]-	557	140.0144:15 193.12013:5 227.05833:5 229.19159:20 249.18045:10 267.26675:31 283.24203:148 327.203:26 327.22345:277 446.29233:71 462.96484:5 464.29861:97 773.40369:5 774.53027:303	FALSE	FALSE	FALSE	FALSE	TRUE	TRUE	376.375	297.688	302.125	229.938	210	330.812	402.938	362.625	366	433.812	363.062	504.25	933.062	1206.25	1252.75	1342.62	0.641989	0.0423819	7.89e-05	0.141838	0.0001202	0.000186
Ether linked phospholipid	EtherPE	40:8e	18:2e	22:6		PE 18:2e/22:6	C45H76NO7P	VVEHXBSUSFPSAC-OJMLKDQNNA-N	CCCCC\C=C/C\C=C/CCCCCCCCOCC(COP(O)(=O)OCCN)OC(=O)CC\C=C/C\C=C/C\C=C/C\C=C/C\C=C/C\C=C/CC	9.7977	772.531	[M-H]-	545	191.1823:3 229.19231:10 249.19911:7 265.26004:7 283.24551:65 327.22998:146 388.99728:3 444.28793:24 460.83554:3 462.29364:61 772.5224:109	FALSE	FALSE	FALSE	FALSE	TRUE	TRUE	206.688	156.312	144.375	96.9375	61.75	65	135.625	131.062	281.188	328.938	264	237.375	1284.06	1140.38	1892	2290.94	0.132388	0.0052231	0.0109639	0.0006705	0.0099986	0.0141375
Free fatty acid	FA	16:0	16:0			FA 16:0	C16H32O2	IPCSVZSSVZVIGE-UHFFFAOYSA-N	CCCCCCCCCCCCCCCC(O)=O	6.33888	255.232	[M-H]-	35419	255.2291:36	TRUE	FALSE	FALSE	FALSE	FALSE	FALSE	33521.4	30864.7	34195.4	32131.8	27982.1	33794.4	44384.8	42757.8	32122.2	29348.3	24768.8	34257.4	41628.3	37522.8	37895.6	49529.2	0.32579	0.285493	0.0208828	0.155279	0.389846	0.0157977
Free fatty acid	FA	16:1	16:1			FA 16:1	C16H30O2	PJHOFUXBXJNUAC-KTKRTIGZSA-N	CCCCCCCC\C=C/CCCCCC(O)=O	5.77003	253.217	[M-H]-	1428	76.97473:1 90.97079:2 116.94951:3 130.95491:2 174.93628:2 218.88437:1 253.21544:53	FALSE	TRUE	FALSE	FALSE	FALSE	FALSE	2980.75	1190	2079.5	1334.19	1038	1057.62	1797.19	1740.06	1094.31	947.375	541.812	1353.75	1311.62	1382.75	1083.19	1923.88	0.330253	0.0860481	0.333487	0.165884	0.952173	0.123144
Free fatty acid	FA	17:0	17:0			FA 17:0	C17H34O2	KEMQGTRYUADPNZ-UHFFFAOYSA-N	CCCCCCCCCCCCCCCCC(O)=O	6.68102	269.248	[M-H]-	1868	156.89043:2 251.23381:5 269.24716:122	TRUE	FALSE	FALSE	FALSE	FALSE	FALSE	1764.25	1790.75	1882.62	1724.5	1437.38	1791	2258.44	2013.25	1869.19	1985.31	1641.94	1926.06	1724.5	2005.62	2013.38	2067	0.664589	0.458779	0.102665	0.92196	0.698128	0.402567
Free fatty acid	FA	18:0	18:0			FA 18:0	C18H36O2	QIQXTHQIDYTFRH-UHFFFAOYSA-N	CCCCCCCCCCCCCCCCCC(O)=O	7.00557	283.263	[M-H]-	15528	151.03419:3 222.92587:3 283.26471:65	TRUE	FALSE	FALSE	FALSE	FALSE	FALSE	14649.1	14929.4	13275.2	14946.4	14868.3	18031.8	17646.1	16676.6	11751.6	14677.4	12552.1	16438.4	12716.4	19296.4	15412.9	20575.8	0.0270587	0.617821	0.253115	0.0596393	0.923109	0.182959
Free fatty acid	FA	18:1	18:1			FA 18:1	C18H34O2	UWHZIFQPPBDJPM-FPLPWBNLSA-N	CCCCCC\C=C/CCCCCCCCCC(O)=O	6.49178	281.248	[M-H]-	15044	72.96218:2 90.9738:4 116.95276:10 154.98009:2 174.46245:4 182.91742:4 263.22238:4 281.24847:662	FALSE	TRUE	FALSE	FALSE	FALSE	FALSE	20003.7	14171.4	19451.9	13821.8	11396.9	13111	20627.6	16046.1	12996.4	12193	9479.69	14557.6	13337.8	18576.1	13585.2	17350.1	0.570912	0.0601416	0.607644	0.238285	0.868651	0.0916878
Free fatty acid	FA	18:2	18:2			FA 18:2	C18H32O2	GKJZMAHZJGSBKD-BLHCBFLLSA-N	CCCCC\C=C\C=C\CCCCCCCCC(O)=O	6.021	279.233	[M-H]-	7975	81.03391:2 84.97243:4 97.06629:4 114.96957:4 138.98792:4 261.20801:6 261.21939:20 278.35587:6 279.2323:610	FALSE	FALSE	FALSE	FALSE	FALSE	TRUE	10788.4	6546.44	7704.44	5174.31	5717.94	5506.38	12713.4	7938.69	6307.25	5031.31	3474.44	10637.4	7348.38	15044.1	6552.44	11112.1	0.846567	0.563497	0.323248	0.506324	0.456425	0.191793
Free fatty acid	FA	18:3	18:3			FA 18:3	C18H30O2	ZSXWVPXJLXTOQQ-ARQDATDDSA-N	CC\C=C\C=C\C=C\CCCCCCCCCC(O)=O	5.60074	277.219	[M-H]-	694	103.02182:10 141.97345:3 146.99181:20 191.04985:7 195.94284:3 233.10518:34 234.10152:7 277.21051:27	FALSE	FALSE	FALSE	FALSE	FALSE	TRUE	891.375	618.5	517.688	490.75	618.25	599.75	1080.88	720	625.812	472	348.688	828.688	648.812	913	609.75	1120.12	0.419852	0.675394	0.246928	0.268348	0.69182	0.159604
Free fatty acid	FA	20:4	20:4			FA 20:4	C20H32O2	YZXBAPSDXZZRGB-CGRWFSSPSA-N	CCCCC\C=C\C\C=C\C\C=C\C\C=C\CCCC(O)=O	5.97866	303.232	[M-H]-	2733	178.92445:5 303.22937:36	FALSE	FALSE	TRUE	FALSE	FALSE	TRUE	1567.25	1430.44	1704.75	1061.19	5255.5	6591.81	14048.2	8751.06	616	271.5	178.375	369.438	470.938	357.875	395.312	665.75	0.0331563	0.0006504	0.0007649	0.0231086	0.0240443	0.36703
Free fatty acid	FA	20:5	20:5			FA 20:5	C20H30O2	JAZBEHYOTPTENJ-JLNKQSITSA-N	CC\C=C/C\C=C/C\C=C/C\C=C/C\C=C/CCCC(O)=O	5.55182	301.217	[M-H]-	2700	138.93478:4 150.13704:2 173.04721:2 174.90273:6 180.98201:2 188.04837:2 257.23703:4 301.21326:10	FALSE	FALSE	FALSE	TRUE	FALSE	TRUE	633.125	233.75	310.438	289.25	280.812	175.5	433.125	342.312	9668.62	6853.44	3461.62	9294.25	2968.94	1777.44	1872.25	4607.5	0.597222	0.0163826	0.0328639	0.0161435	0.0316469	0.0285148
Free fatty acid	FA	22:4	22:4			FA 22:4	C22H36O2	IGFLWIHPPADNDL-GFRMADBLSA-N	CC\C=C\C\C=C\C\C=C\C\C=C\CCCCCCCCC(O)=O	6.55147	331.264	[M-H]-	525	75.00769:2 76.97072:6 100.97066:4 121.03246:2 140.97098:4 162.95996:2 166.9431:8 190.93828:6 206.92972:4 288.88202:4 295.24799:29 296.24771:4 313.25443:61 331.26462:24	FALSE	FALSE	FALSE	FALSE	FALSE	TRUE	284.25	440.625	399.5	413.625	853	829.125	1918.56	1253.19	217.938	236.688	195.062	263.938	251.125	282.5	262.375	297.5	0.0458356	0.0058878	0.0214827	0.030246	0.0342572	0.0455409
Free fatty acid	FA	22:5	22:5			FA 22:5	C22H34O2	YUFFSWGQGVEMMI-RCHUDCCISA-N	CC\C=C\C\C=C\C\C=C\C\C=C\C\C=C\CCCCCC(O)=O	6.1645	329.249	[M-H]-	757	135.12457:3 181.12643:3 300.84592:3 329.22626:7 329.24161:24	FALSE	FALSE	FALSE	FALSE	FALSE	TRUE	317.125	117.25	189.5	129.75	321.25	296	695.312	403.875	2349.5	1465.56	827.688	1737.44	841.375	473.375	709.25	1231.81	0.057081	0.01983	0.0091031	0.0121024	0.0805244	0.0690304
Free fatty acid	FA	22:6	22:6			FA 22:6	C22H32O2	MBMBGCFOFBJSGT-SFGLVEFQSA-N	CC\C=C\C\C=C\C\C=C\C\C=C\C\C=C\C\C=C\CCC(O)=O	5.85704	327.233	[M-H]-	4688	166.94337:5 177.16046:5 249.19714:5 283.22687:10 283.23398:15 327.23553:25	FALSE	FALSE	FALSE	FALSE	TRUE	TRUE	1419	729.875	1083.56	898.375	736.438	802.375	1773.44	1009.94	2810.12	1839.5	1175.94	2592.19	15003.9	8262.12	12875.3	22003	0.870054	0.0369008	0.0178327	0.0599252	0.0177708	0.0214598
Hexosyl ceramide	HexCer-NS	d30:1	d18:1	12:0		HexCer-NS d18:1/12:0	C36H69NO8	IYCYEZLMOLRFAN-WJTDDFOZNA-N	CCCCCCCCCCCCC\C=C\C(O)C(COC1OC(CO)C(O)C(O)C1O)NC(=O)CCCCCCCCCCC	8.13285	702.512	[M+Hac-H]-	8157	71.01416:46 85.02863:46 87.01122:21 89.02463:391 95.0104:20 101.02348:176 113.02486:122 119.03397:371 131.03084:36 143.02588:15 143.03264:31 149.04808:36 161.04752:56 179.05467:163 181.15657:87 198.18472:102 199.17119:138 224.20384:310 235.21864:5 237.22462:138 240.1916:87 263.23428:107 280.26547:31 432.4198:133 444.41733:20 448.41516:71 450.41928:112 462.41953:76 478.91226:20 480.43884:1959 642.…	TRUE	FALSE	FALSE	FALSE	FALSE	FALSE	7508.12	7122.44	6695.81	7862.69	6250.19	8904.31	8663.38	8240.94	8867.88	9638	7811.19	10396.9	6927.38	8410.25	8953.62	8260.5	0.314738	0.0211074	0.142382	0.204885	0.873452	0.187752
Hexosyl ceramide	HexCer-NS	d34:1	d18:1	16:0		HexCer-NS d18:1/16:0	C40H77NO8	VJLLLMIZEJJZTE-ORIPQNMZNA-N	CCCCCCCCCCCCCCCC(=O)NC(COC1OC(CO)C(O)C(O)C1O)C(O)\C=C\CCCCCCCCCCCCC	9.22145	758.571	[M+Hac-H]-	781	89.02707:41 119.0354:31 179.05673:20 255.23604:41 280.25912:41 500.4826:10 534.82825:10 536.50354:184 698.4964:20 698.53741:344	TRUE	FALSE	FALSE	FALSE	FALSE	FALSE	746	1600.38	1033.25	808.438	729.562	655.125	1025.94	918.938	510.25	568.625	719.625	729.062	374	653.188	729.438	692.875	0.351064	0.0856923	0.0846918	0.0948509	0.110252	0.848317
Hexosyl ceramide	HexCer-NS	d40:1	d18:1	22:0		HexCer-NS d18:1/22:0	C46H89NO8	YIGARKIIFOHVPF-LAPDZXRHNA-N	CCCCCCCCCCCCCCCCCCCCCC(=O)NC(COC1OC(CO)C(O)C(O)C1O)C(O)\C=C\CCCCCCCCCCCCC	12.705	842.662	[M+Hac-H]-	1020	71.01293:2 83.01488:3 87.00725:2 89.02195:38 95.00902:2 101.02491:11 107.03415:2 111.00887:1 113.0264:13 119.03247:32 122.92622:1 127.00822:1 143.02934:8 143.98944:1 161.04225:8 179.05106:9 235.20161:1 237.21838:6 263.23462:9 266.25821:2 275.00894:1 280.25641:3 283.02692:1 303.0304:2 313.04977:1 321.30957:7 337.34534:3 338.34125:10 339.33081:16 350.95081:2 364.35107:25 380.34055:8 388.93555:2 390…	TRUE	FALSE	FALSE	FALSE	FALSE	FALSE	1138.88	997	1291.5	1241.5	774.438	1202.25	960.125	1253.25	1004.88	737.688	902.562	946	819.75	880.25	940.312	1223.25	0.388721	0.0209035	0.11809	0.276625	0.587868	0.544558
Hexosyl ceramide	HexCer-NS	d42:1	d18:1	24:0		HexCer-NS d18:1/24:0	C48H93NO8	POQRWMRXUOPCLD-MHAUTQJVNA-N	CCCCCCCCCCCCCCCCCCCCCCCC(=O)NC(COC1OC(CO)C(O)C(O)C1O)C(O)\C=C\CCCCCCCCCCCCC	13.1395	870.693	[M+Hac-H]-	2287	87.00646:10 89.02247:36 96.02307:5 101.02539:20 113.02682:15 119.03749:20 179.05115:15 235.09966:5 349.35498:15 366.37262:15 367.34555:25 392.38672:25 600.59601:10 616.61127:5 630.61719:15 648.63049:168 650.62286:10 810.66724:345	TRUE	FALSE	FALSE	FALSE	FALSE	FALSE	1845.88	3651.81	3267.56	2632.81	1453.31	2976.75	1912	2276.75	1668.69	2029	2150.94	2313.31	1984.06	1957.25	2209	2259.75	0.221545	0.101139	0.15394	0.754971	0.883682	0.70662
Lyso phospholipid	LPC	16:0	16:0			LPC 16:0	C24H50NO7P	ASWBNKHCZGQVJV-UHFFFAOYNA-N	CCCCCCCCCCCCCCCC(=O)OCC(O)COP([O-])(=O)OCC[N+](C)(C)C	6.2708	554.344	[M+Hac-H]-	9847	78.95927:110 96.97324:6 101.02474:6 122.98084:8 134.98335:4 152.99631:63 168.04268:84 171.00227:8 183.3855:2 194.05711:10 212.40135:2 224.06689:465 225.05856:4 235.21689:2 237.21634:8 242.07635:126 254.43184:27 255.23372:7020 256.22879:6 256.42984:4 258.12955:4 261.12604:4 281.33011:2 370.03491:4 389.30356:2 391.22968:8 406.81836:2 409.2467:8 435.24554:4 450.8222:2 478.7627:4 478.77814:10 480.307…	TRUE	FALSE	FALSE	FALSE	FALSE	FALSE	7924.81	13086.9	11340.4	8388.44	5788.44	10938.8	8720.88	11890.9	9022.62	10149.8	8958.56	11217.9	8036.62	10388.8	10366.1	11328.2	0.658392	0.803758	0.916177	0.74207	0.66481	0.834339
Lyso phospholipid	LPC	17:1	17:1			LPC 17:1	C25H50NO7P	LPMGFNAQZPADDZ-QXMHVHEDNA-N	CCCCCCC\C=C/CCCCCCCC(=O)OCC(O)COP([O-])(=O)OCC[N+](C)(C)C	6.06399	566.343	[M+Hac-H]-	2621	78.95921:35 150.98531:2 152.99272:14 166.7009:2 168.04808:20 194.05702:4 224.06467:133 242.05867:4 242.07404:37 266.38724:8 267.23077:1787 403.20901:4 479.82202:4 490.74448:4 492.24911:6 492.30859:478 497.56021:2 566.34039:4	FALSE	TRUE	FALSE	FALSE	FALSE	FALSE	2861	2448.19	2883.31	2674	2370.69	2382.81	3094.06	2315.12	2519.75	2696.75	2270.31	3054.44	2204.25	3110.44	2634	2415.25	0.435936	0.688705	0.58673	0.715695	0.857369	0.867531
Lyso phospholipid	LPC	18:0	18:0			LPC 18:0	C26H54NO7P	IHNKQIMGVNPMTC-UHFFFAOYNA-N	CCCCCCCCCCCCCCCCCC(=O)OCC(O)COP([O-])(=O)OCC[N+](C)(C)C	6.89736	582.374	[M+Hac-H]-	4092	78.95847:43 86.09387:2 96.96671:6 101.02657:20 122.98277:4 136.99931:2 140.01822:8 152.99307:22 168.04288:33 171.00984:4 178.0218:4 180.04758:4 196.03568:8 206.96255:2 223.3683:4 224.06897:208 242.06087:4 242.08063:61 252.05829:6 265.24612:6 282.36734:12 282.38394:16 283.26193:2977 284.26971:4 300.02399:4 394.84573:4 419.26251:12 437.25433:8 462.2803:6 480.30313:16 506.72501:8 508.33664:892 523.3…	TRUE	FALSE	FALSE	FALSE	FALSE	FALSE	3149.25	7335.94	4869.5	3300.88	2824.44	5192.69	4739.94	5378	3719.06	3872.81	3598.12	4401.69	2561.94	3623.62	3537.12	3360.56	0.912427	0.491391	0.249005	0.338519	0.0932832	0.0818013
Lyso phospholipid	LPC	18:1	18:1			LPC 18:1	C26H52NO7P	YAMUFBLWGFFICM-SEYXRHQNNA-N	CCCCCCCC\C=C/CCCCCCCC(=O)OCC(O)COP([O-])(=O)OCC[N+](C)(C)C	6.38652	580.357	[M+Hac-H]-	962	78.95914:13 83.04665:4 83.05179:7 96.9687:2 122.98637:2 127.04548:2 138.91551:1 140.01862:3 152.99339:7 168.04494:17 180.90831:1 194.01993:2 196.03572:6 205.58046:1 217.00758:2 224.07092:44 242.08252:15 255.22638:36 280.37152:4 281.24637:670 283.26129:3 416.25278:2 435.2366:2 452.27905:6 480.28839:2 504.72653:3 506.31909:169 519.19489:1 580.34949:3	FALSE	TRUE	FALSE	FALSE	FALSE	FALSE	1322.88	1475.06	1431.25	1243.5	544	767.625	1060.5	1061.88	913.688	974.125	953.062	680.125	697.625	936.5	545.25	780.062	0.009573	0.0012733	0.0006435	0.883914	0.458518	0.234167
Lyso phospholipid	LPC	18:2	18:2			LPC 18:2	C26H50NO7P	SPJFYYJXNPEZDW-UTJQPWESNA-N	CCCCC\C=C/C\C=C/CCCCCCCC(=O)OCC(O)COP([O-])(=O)OCC[N+](C)(C)C	5.82324	578.345	[M+Hac-H]-	893	78.95804:5 152.99278:5 168.04446:5 221.73059:1 224.07101:9 242.07843:27 259.20279:2 261.21939:7 278.35352:7 279.23227:975 280.24469:2 303.23932:2 446.79242:2 490.79117:4 502.7446:2 504.30554:131 519.26312:2 528.3244:1 534.77856:3 578.34375:3	FALSE	FALSE	FALSE	FALSE	FALSE	TRUE	903.438	1093.88	917.5	606.438	267.438	1057.75	777.062	736	780.5	916.188	1007.44	1036.88	893.125	1120.06	1167.06	1013.94	0.409128	0.653423	0.203791	0.24139	0.100476	0.225344
Lyso phospholipid	LPC	20:4	20:4			LPC 20:4	C28H50NO7P	GOMVPVRDBLLHQC-DOFZRALJNA-N	CC\C=C/C\C=C/C\C=C/C\C=C/CCCCCCC(=O)OCC(O)COP([O-])(=O)OCC[N+](C)(C)C	5.79837	602.346	[M+Hac-H]-	503	78.95918:10 165.12347:2 168.04456:10 177.0929:4 203.17004:2 205.19028:10 211.61667:2 219.13942:2 224.06703:8 225.18785:4 231.2092:4 235.16296:2 242.07874:31 259.2486:47 285.22745:8 301.20389:4 303.23001:634 304.23331:4 472.82333:2 528.30945:143 602.34558:4	FALSE	FALSE	TRUE	FALSE	FALSE	TRUE	523.375	483.938	358.062	278.438	530.25	1454.25	1342.75	1544	170.062	223.688	262.25	154.25	125.125	263.5	209.75	126.5	0.036808	0.0149311	0.0130102	0.0216194	0.0198938	0.629113
Lyso phospholipid	LPC	22:6	22:6			LPC 22:6	C30H50NO7P	LSOWKZULVQWMLY-WSDBEMKQNA-N	CC\C=C/C\C=C/C\C=C/C\C=C/C\C=C/C\C=C/CCC(=O)OCC(O)COP([O-])(=O)OCC[N+](C)(C)C	5.74605	626.343	[M+Hac-H]-	532	177.16217:4 217.1987:2 229.18567:8 242.0804:8 276.91907:2 283.24515:45 299.2179:2 327.19885:8 327.23459:84 458.94647:4 552.30414:57 552.32074:43 626.75708:4	FALSE	FALSE	FALSE	FALSE	TRUE	TRUE	230.375	303.125	257.875	223.75	235.125	463.188	462.812	503.688	445.812	511.438	316.25	441.875	1074.31	971	976.375	1102.75	0.0435515	0.0077471	9e-07	0.869059	0.0001185	2.75e-05
Lyso phospholipid	LPE	16:0	16:0			LPE 16:0	C21H44NO7P	YVYMBNSKXOXSKW-UHFFFAOYNA-N	CCCCCCCCCCCCCCCC(=O)OCC(O)COP(O)(=O)OCCN	6.34174	452.274	[M-H]-	2038	140.01007:20 192.94846:10 196.03389:51 206.93839:10 214.05191:31 255.23146:541 452.25427:20 452.28128:51	TRUE	FALSE	FALSE	FALSE	FALSE	FALSE	1907	3079.38	2516.44	1709.06	1084.19	1988.88	2039.94	1963.62	1616	1810.81	2047.06	2455.12	2077	1976.38	1992.31	2344.44	0.215786	0.406444	0.54716	0.492368	0.227363	0.584717
Lyso phospholipid	LPE	18:0	18:0			LPE 18:0	C23H48NO7P	BBYWOYAFBUOUFP-UHFFFAOYNA-N	CCCCCCCCCCCCCCCCCC(=O)OCC(O)COP(O)(=O)OCCN	6.96506	480.307	[M-H]-	1729	78.9604:46 122.98233:5 140.01118:36 152.99626:20 196.02573:15 196.03955:61 214.04349:25 274.88531:5 283.26474:1039 478.79715:5 480.31119:82	TRUE	FALSE	FALSE	FALSE	FALSE	FALSE	1117.44	2398.12	1734.5	1398.62	934.562	2375.88	1852.31	1938.12	1325.88	1600.19	1591.44	2599.25	1641.56	1573	1559.88	2021.81	0.791801	0.776223	0.905084	0.992641	0.820799	0.799073
Lyso phospholipid	LPE	20:4	20:4			LPE 20:4	C25H44NO7P	JPNPIRVRGLGTRE-LTKCOYKYNA-N	CC\C=C/C\C=C/C\C=C/C\C=C/CCCCCCC(=O)OCC(O)COP(O)(=O)OCCN	5.88568	500.276	[M-H]-	523	78.95784:6 140.01451:6 152.99626:4 196.03368:8 203.11772:2 205.19025:8 214.05388:14 217.19284:2 231.20918:6 259.24631:33 262.90549:4 285.21558:4 288.88272:6 301.23087:4 303.2276:297 394.85007:4 485.85977:2 500.27185:16	FALSE	FALSE	TRUE	FALSE	FALSE	TRUE	705.938	737.875	727.312	465.688	595.875	1160.56	1028.06	1245.94	208.625	202.625	241.062	247.438	193.125	214.938	135.625	262.875	0.069975	0.0058908	0.000613	0.0120349	0.0100081	0.448005
Lyso phospholipid	LPE	22:6	22:6			LPE 22:6	C27H44NO7P	XEVRBOQZSXWGQO-KUBAVDMBNA-N	CC\C=C/C\C=C/C\C=C/C\C=C/C\C=C/C\C=C/CCC(=O)OCC(O)COP(O)(=O)OCCN	5.84157	524.274	[M-H]-	506	78.95839:12 121.1013:4 129.06477:2 135.11316:6 140.00984:14 152.99129:4 163.15501:8 177.15685:4 187.14987:2 191.18443:4 196.03964:12 214.04143:8 214.04556:27 229.19664:22 249.18353:6 257.14648:4 283.24777:57 309.21698:8 327.2348:108 524.27087:10	FALSE	FALSE	FALSE	FALSE	TRUE	TRUE	300.75	271.875	282.875	270.875	172.438	413.625	358.438	356.812	319.438	358.875	396.625	671.625	952.562	917.688	785.188	1258.94	0.468683	0.147318	0.0059427	0.288857	0.0011794	0.0055007
Lyso phospholipid	LPI	18:0	18:0			LPI 18:0	C27H53O12P	MXAFDFDAIFZFET-UHFFFAOYNA-N	CCCCCCCCCCCCCCCCCC(=O)OCC(O)COP(O)(=O)OC1C(O)C(O)C(O)C(O)C1O	6.2862	599.316	[M-H]-	1045	78.95838:37 96.96935:14 152.99625:104 171.00764:4 223.0031:12 241.01208:147 248.68417:2 255.22839:10 259.02493:10 281.23679:2 283.2612:375 315.04169:80 333.05344:4 410.23282:4 417.24136:4 419.25262:35 437.26785:8 597.42639:6 599.30743:449	TRUE	FALSE	FALSE	FALSE	FALSE	FALSE	796.938	1592.25	1080	463.438	285	1021.25	763.688	1952	536.5	1010.19	802.5	1094.81	1042.31	1094.56	1299.62	1879.38	0.959726	0.666151	0.302055	0.711025	0.448947	0.086486
Lyso phospholipid	LPI	20:4	20:4			LPI 20:4	C29H49O12P	BAWAZBRKENFJED-LTKCOYKYNA-N	CC\C=C/C\C=C/C\C=C/C\C=C/CCCCCCC(=O)OCC(O)COP(O)(=O)OC1C(O)C(O)C(O)C(O)C1O	5.23308	619.284	[M-H]-	511	78.95851:5 152.99823:18 164.98215:1 179.10016:1 205.20015:2 223.00131:6 241.01024:17 259.02075:2 259.23651:5 283.21646:1 301.22974:2 303.23383:37 315.0321:5 315.04462:14 333.05386:2 358.04858:1 366.96481:2 382.9805:1 404.8725:2 494.8237:2 504.80753:1 532.91486:1 574.79395:2 619.28534:44	FALSE	FALSE	TRUE	FALSE	FALSE	TRUE	435.125	903.375	475.062	391.938	379.938	1105.06	649.875	638.125	337.625	374.625	472.875	417.875	433.25	441.312	396.562	324.25	0.487349	0.296521	0.290872	0.146439	0.144732	0.963072
Glycerolipid	MAG	16:0	16:0			MAG 16:0	C19H38O4	QHZLMUACJMDIAE-UHFFFAOYNA-N	CCCCCCCCCCCCCCCC(=O)OCC(O)CO	6.92423	348.311	[M+NH4]+	1954	71.0871:8 81.06691:6 83.08645:4 85.0983:10 95.08467:8 97.41421:2 98.9857:6 182.99225:2 257.26291:2 291.1972:2 313.26889:12	TRUE	FALSE	FALSE	FALSE	FALSE	FALSE	2045.31	1732.75	2178.25	1829.94	1794.69	1943.44	1899.88	2191.44	1670.5	1984.44	2225.94	2082.94	2089.06	1794.88	1899.88	1895	0.937232	0.784521	0.827966	0.824097	0.72993	0.610939
Oxidized phospholipid	OxPC	36:2+2O	18:0	18:2+2O		OxPC 18:0-18:2+2O	C44H84NO10P	PZANWOBHYGUINP-XPGOGURHNA-N	CCCCCCCCCCCCCCCCCC(=O)OCC(COP([O-])(=O)OCC[N+](C)(C)C)OC(=O)CCCCCCC\C=C/C=C/C(CCCCC)OO	8.21594	876.587	[M+Hac-H]-	687	78.95743:5 96.96948:2 113.09841:4 125.00761:3 139.11914:1 143.10483:2 149.09584:2 152.98703:2 152.9975:6 159.7959:1 167.10666:2 168.04001:17 171.10103:3 177.12938:5 179.00844:2 179.10284:3 181.11763:3 185.11957:3 193.11932:3 195.13831:16 196.04208:3 197.11629:2 199.14008:2 205.12187:5 208.07269:2 209.48758:1 217.12434:1 222.05031:2 223.13022:49 224.067:14 237.14886:2 242.07176:3 249.2256:5 253.21…	TRUE	FALSE	FALSE	FALSE	FALSE	TRUE	619.812	1234.25	1053.06	617.688	348.938	592.938	427.688	465.188	506.312	621.625	826.25	1074.44	552.125	539.812	631.125	882.312	0.0420361	0.557382	0.237282	0.068629	0.0875423	0.501439
Oxidized phospholipid	OxPC	38:6+4O	18:0	20:6+4O		OxPC 18:0-20:6+4O	C46H84NO12P	RJVUPNGPMPSSRJ-PIKMSLHQNA-N	CCCCCCCCCCCCCCCCCC(=O)OCC(COP([O-])(=O)OCC[N+](C)(C)C)OC(=O)CCC\C=C/CC1C2CC(OO2)C1\C=C\C(CCCCC)OO	7.93417	932.584	[M+Hac-H]-	411	122.98551:15 124.99817:10 152.99106:20 168.04086:20 207.13716:15 215.14934:15 217.16367:46 224.06694:25 233.15485:36 245.19281:15 259.16666:10 269.19058:15 283.26233:235 313.18509:10 331.18048:41 349.20111:20 419.258:20 437.24689:15 447.28528:25 455.21616:5 465.29626:25 490.32623:20 508.3385:56 602.3623:5 606.37225:20 671.49146:15 726.48645:10 751.4519:20 753.45679:15 769.44751:20 777.46844:10 79…	TRUE	FALSE	FALSE	FALSE	FALSE	TRUE	174.625	369.25	248.25	173.75	1118.81	1252	1207.25	1234.81	118.688	105.438	164.312	135.25	43.25	96.75	54.5	86.875	2.2e-06	0.0598478	0.0116113	0	0	0.0151311
Oxidized phospholipid	OxPE	36:6+4O	16:0	20:6+4O		OxPE 16:0-20:6+4O	C41H74NO12P	RQQQEKCRGTXAGL-RVKPKNHYNA-N	CCCCCCCCCCCCCCCC(=O)OCC(COP(O)(=O)OCCN)OC(=O)CCC\C=C/CC1C2CC(OO2)C1\C=C\C(CCCCC)OO	7.55894	802.48	[M-H]-	700	76.98444:3 78.95921:28 96.96348:5 107.05149:3 109.0668:13 111.04289:23 113.02024:10 115.03773:8 129.06131:8 135.08176:10 140.01295:23 141.05841:8 152.9894:13 153.05573:23 179.07193:10 195.05708:5 196.0318:33 207.14543:8 214.04366:13 217.15967:143 233.15073:10 255.23401:331 259.17142:13 269.18619:31 271.20868:18 276.01425:3 277.18289:10 280.12711:3 287.20648:18 289.17065:10 303.19571:8 313.18289:1…	TRUE	FALSE	FALSE	FALSE	FALSE	TRUE	912.938	894.062	1052.81	1136.06	996.75	1475.12	1280.38	1787.88	187.25	205.188	245.125	240.5	165.5	200.25	191.5	223.812	0.0708741	0.00054	0.0005529	0.0057625	0.0054791	0.236613
Oxidized phospholipid	OxPE	38:6+2O	16:0	22:6+2O		OxPE 16:0-22:6+2O	C43H74NO10P	SCYWYYHWCCACDV-YVUSFSRCNA-N	CCCCCCCCCCCCCCCC(=O)OCC(COP(O)(=O)OCCN)OC(=O)CC\C=C\C\C=C\C\C=C\C=C/C(O)C\C=C\C\C=C/C(C)O	7.92628	794.498	[M-H]-	886	71.05265:5 135.11829:5 140.0067:20 149.10017:10 191.11038:5 196.04167:31 214.0497:15 255.23575:148 297.2247:51 323.20135:10 341.21484:66 452.27472:66 748.46783:25 776.46826:51 776.49579:56 792.03662:5 794.48462:61	TRUE	FALSE	FALSE	FALSE	FALSE	TRUE	444.625	509.562	527.812	349	793.312	1146.94	1005.19	1188.31	678	815.312	848.562	979.625	1093.31	1168	1004.06	1629.5	0.0010695	0.0023613	0.0018665	0.110555	0.293783	0.041807
Oxidized phospholipid	OxPE	38:6+4O	16:0	22:6+4O		OxPE 16:0-22:6+4O	C43H74NO12P	KMTPPSPWNUTXIB-BREAOWQZNA-N	CCCCCCCCCCCCCCCC(=O)OCC(COP(O)(=O)OCCN)OC(=O)CCC(O)\C=C\C(O)\C=C\C=C\C=C/C(O)C\C=C\C\C=C/C(C)O	7.6944	826.482	[M-H]-	1259	78.9595:16 83.05091:4 93.03751:4 95.05167:8 97.02901:14 99.04636:4 101.02491:4 106.04089:4 107.05312:8 113.02337:6 121.05762:4 121.06383:27 127.03203:4 133.05592:4 133.06406:6 135.07521:4 139.03627:6 139.04625:12 140.01294:16 141.05:4 145.05971:2 151.08075:2 152.99628:8 162.06259:14 162.06978:20 184.09302:4 189.12752:4 196.03537:57 203.14154:4 206.05386:6 213.13376:8 214.04935:16 219.17447:4 229.…	TRUE	FALSE	FALSE	FALSE	FALSE	TRUE	756.562	785.375	1046.12	1023.06	855.812	1032.69	894	1169.62	896.688	1065.75	1357.19	1419.31	1913.75	1910.88	1772.75	2251.75	0.446498	0.0996963	0.0001643	0.216294	0.0002299	0.0028104
Oxidized phospholipid	OxPE	38:6+4O	16:0	22:6+4O		OxPE 16:0-22:6+4O	C43H74NO12P	KMTPPSPWNUTXIB-BREAOWQZNA-N	CCCCCCCCCCCCCCCC(=O)OCC(COP(O)(=O)OCCN)OC(=O)CCC(O)\C=C\C(O)\C=C\C=C\C=C/C(O)C\C=C\C\C=C/C(C)O	7.22273	826.483	[M-H]-	1128	140.00961:17 196.0396:27 202.09743:10 203.13983:7 207.10468:14 255.23152:184 283.2623:24 291.82053:3 293.18881:10 297.18637:3 311.19803:14 327.15359:14 337.16705:7 355.18546:34 373.19568:10 391.21024:14 433.15521:3 434.25714:14 447.14487:3 452.2735:48 666.41479:3 754.43665:7 766.4519:10 780.45703:7 790.49353:10 792.46246:10 792.49023:17 808.47449:44 826.47913:88	TRUE	FALSE	FALSE	FALSE	FALSE	TRUE	606.188	634.5	685.5	589.688	818.75	1114.06	1062.44	1269.12	1026.19	1258.31	1245.5	1382.81	1504.31	1406.88	1330.31	2105.94	0.01596	0.0002376	0.0116754	0.222873	0.0403335	0.110342
Oxidized phospholipid	OxPE	36:2+2O	18:0	18:2+2O		OxPE 18:0-18:2+2O	C41H78NO10P	VCVHODUCNAFSHE-TVRAAEJBNA-N	CCCCCCCCCCCCCCCCCC(=O)OCC(COP(O)(=O)OCCN)OC(=O)CCCCCCC\C=C/C=C/C(CCCCC)OO	8.2407	774.52	[M-H]-	1193	113.09676:14 122.00166:10 140.0128:27 167.10544:10 179.10173:14 195.1413:51 196.03917:34 205.12508:14 214.04506:7 221.19684:3 223.1317:68 238.05318:3 249.22305:17 281.24408:10 283.26141:409 292.28979:7 293.20959:602 295.21112:10 311.20694:7 417.70035:3 462.29187:24 472.23486:10 480.30563:68 490.25827:10 658.44025:34 686.39233:14 686.4256:61 756.49982:116 774.48859:27 774.52789:105	TRUE	FALSE	FALSE	FALSE	FALSE	TRUE	1167.69	1451.31	1551.75	1121.31	657.688	1077.25	715.625	744.562	853.562	1159.81	1655.81	2028.44	860.25	1296.31	1134.62	1619.44	0.0100885	0.730642	0.634482	0.0647656	0.0592365	0.542707
Oxidized phospholipid	OxPE	38:4+2O	18:0	20:4+2O		OxPE 18:0-20:4+2O	C43H78NO10P	CKGJNUHREJTHCB-QDGJUDQHNA-N	CCCCCCCCCCCCCCCCCC(=O)OCC(COP(O)(=O)OCCN)OC(=O)CCC\C=C\CC(O)\C=C/C1OC1C\C=C\CCCCC	8.3515	798.533	[M-H]-	833	113.09695:51 140.00978:41 194.95073:10 196.03975:41 203.1078:31 247.12335:31 247.13889:31 273.22226:122 278.00793:21 283.26245:345 304.2258:10 317.20825:309 480.30777:112 710.4577:20 738.49982:10 780.51202:112 780.59088:10 798.49536:61 798.51532:153	TRUE	FALSE	FALSE	FALSE	FALSE	TRUE	694.938	772.625	679.312	422.188	1240.25	1907.94	1760.81	2738.81	351.375	519.188	408.375	410.375	267	386.562	332.688	431	0.0231245	0.0393941	0.0139757	0.0165708	0.0146185	0.221026
Oxidized phospholipid	OxPE	38:6+4O	18:0	20:6+4O		OxPE 18:0-20:6+4O	C43H78NO12P	WXCBOTAGPWRHOC-SZXPTWDZNA-N	CCCCCCCCCCCCCCCCCC(=O)OCC(COP(O)(=O)OCCN)OC(=O)CCC\C=C/CC1C2CC(OO2)C1\C=C\C(CCCCC)OO	7.46303	830.513	[M-H]-	844	78.96036:8 82.00967:2 93.03444:2 97.03007:4 109.06667:10 111.04277:4 113.08912:4 121.0605:4 124.04863:2 127.00163:4 127.10341:4 133.06877:2 140.00948:8 145.06131:2 149.09624:8 153.09222:4 155.06612:4 161.09227:4 163.11871:4 167.10379:4 173.10101:6 177.12473:8 179.14163:4 182.09035:2 187.11111:4 190.66765:4 193.07751:4 193.09712:6 195.10223:4 196.03163:16 203.10962:4 206.13313:4 214.04761:4 216.14…	TRUE	FALSE	FALSE	FALSE	FALSE	TRUE	918.125	1051.25	801.062	724.125	1390.5	1844.44	1755.62	1835.69	354.625	422	502.562	535.125	265.312	378.375	352.5	378.438	0.0006492	0.0021925	0.0004402	3.49e-05	0.0006356	0.0648358
Oxidized phospholipid	OxPE	38:6+4O	18:0	20:6+4O		OxPE 18:0-20:6+4O	C43H78NO12P	WXCBOTAGPWRHOC-SZXPTWDZNA-N	CCCCCCCCCCCCCCCCCC(=O)OCC(COP(O)(=O)OCCN)OC(=O)CCC\C=C/CC1C2CC(OO2)C1\C=C\C(CCCCC)OO	7.66126	830.514	[M-H]-	2227	78.96066:17 83.05211:10 95.04749:14 109.064:17 113.09689:17 127.0798:10 135.0835:14 137.09659:17 140.0097:37 147.08063:10 149.093:14 152.99469:14 154.09619:7 155.10497:37 161.09067:10 163.11169:20 167.10944:10 173.09375:17 175.07831:10 179.1078:7 183.10103:7 187.11317:27 189.12781:20 189.16273:3 191.10054:17 191.14737:3 193.08353:31 196.03569:71 204.11238:14 205.08316:10 205.11751:17 207.10066:20…	TRUE	FALSE	FALSE	FALSE	FALSE	TRUE	2328.31	2684.19	2129.44	1608.5	3842.62	5054.06	4983.94	5381.19	1021.81	971.875	1139.56	1228.5	712.562	813.438	817.812	918	0.0006274	0.003221	0.0076064	0.0012549	0.0011221	0.0085019
Oxidized phospholipid	OxPE	38:6+4O	18:0	20:6+4O		OxPE 18:0-20:6+4O	C43H78NO12P	WXCBOTAGPWRHOC-SZXPTWDZNA-N	CCCCCCCCCCCCCCCCCC(=O)OCC(COP(O)(=O)OCCN)OC(=O)CCC\C=C/CC1C2CC(OO2)C1\C=C\C(CCCCC)OO	7.9649	830.515	[M-H]-	3310	72.78565:3 78.95903:25 95.04964:5 109.06171:10 111.04666:8 113.02701:13 115.03696:10 129.05708:8 131.03459:8 138.07014:3 140.01007:23 141.05884:8 152.98793:8 153.05426:10 175.14551:8 176.08229:5 178.03113:10 189.12569:5 191.14131:8 196.0374:51 197.07793:8 202.09915:3 203.14958:8 207.13072:8 214.0472:13 217.15903:201 221.11502:8 224.06425:3 233.14983:13 235.16211:8 245.18971:25 249.15823:3 255.223…	TRUE	FALSE	FALSE	FALSE	FALSE	TRUE	3456	4146.88	3749.19	2379.25	5467.5	7716	7055.06	7158	1549.81	1348.56	1636.44	1648.56	1031.06	1641.88	1228.69	1751.12	0.0014232	0.0139406	0.0028052	0.001386	4.11e-05	0.497024
Oxidized phospholipid	OxPE	38:7+3O	18:0	20:7+3O		OxPE 18:0-20:7+3O	C43H76NO11P	ZHRALJRVCXANPU-UJNQZSPMNA-N	CCCCCCCCCCCCCCCCCC(=O)OCC(COP(O)(=O)OCCN)OC(=O)CCC\C=C/CC1C2CC(OO2)C1\C=C\C(O)C\C=C/CC	7.99255	812.508	[M-H]-	449	111.03986:20 111.0473:24 125.05806:3 140.01114:10 153.05029:17 196.03738:34 217.15509:31 269.19019:10 281.24933:10 283.26428:167 289.18195:10 313.1821:14 330.14081:3 331.19022:41 349.20053:68 462.29617:14 480.30389:58 671.47174:14 793.12854:3 794.4762:27 812.50214:240	TRUE	FALSE	FALSE	FALSE	FALSE	TRUE	499.875	474	420.062	322.938	633.812	1131.38	1071.94	1109.94	175.625	177.125	225.812	227.312	134.562	202.25	176.125	202.25	0.0042156	0.0015763	0.0010308	0.0064858	0.0058755	0.33377
Oxidized phospholipid	OxPE	38:7+4O	18:0	20:7+4O		OxPE 18:0-20:7+4O	C43H76NO12P	GOFWOLZCOBHJMK-UJNQZSPMNA-N	CCCCCCCCCCCCCCCCCC(=O)OCC(COP(O)(=O)OCCN)OC(=O)CCC\C=C/CC1C2CC(OO2)C1\C=C\C(C\C=C/CC)OO	7.76995	828.498	[M-H]-	533	78.95676:10 83.05197:2 85.07006:1 87.04786:3 95.04871:3 96.96905:5 107.04563:3 109.06087:5 109.06677:6 111.04584:18 113.0217:2 115.04071:7 121.06522:2 122.00165:4 127.99585:1 129.05801:5 135.07837:4 137.06664:3 140.01283:16 141.05157:3 146.07593:3 147.08211:3 149.09622:4 151.11363:2 152.9962:5 153.0538:10 153.09045:2 161.09581:2 163.11145:2 167.00342:2 172.09065:2 175.07059:2 175.11353:2 178.0271…	TRUE	FALSE	FALSE	FALSE	FALSE	TRUE	124.938	137.75	135.438	90.25	163.938	272	166.25	262.5	1039.44	1105.38	1252.62	1276.81	542.188	627.188	553.5	784.75	0.0245142	0.000246	0.002251	6.1e-06	0.0006329	0.0005094
Oxidized phospholipid	OxPE	38:7+4O	18:0	20:7+4O		OxPE 18:0-20:7+4O	C43H76NO12P	GOFWOLZCOBHJMK-UJNQZSPMNA-N	CCCCCCCCCCCCCCCCCC(=O)OCC(COP(O)(=O)OCCN)OC(=O)CCC\C=C/CC1C2CC(OO2)C1\C=C\C(C\C=C/CC)OO	7.48083	828.506	[M-H]-	890	78.95718:8 91.09224:1 95.05048:3 97.03059:2 109.06419:2 113.10007:2 115.03804:4 121.06557:3 123.04372:2 125.05842:4 134.98193:2 135.12296:4 137.06198:3 140.01146:11 143.07669:8 146.07449:2 147.1149:1 149.0896:2 151.11215:3 152.99297:5 153.09245:2 157.06345:1 161.06023:2 163.06662:2 165.09088:2 167.06744:8 167.10757:3 169.05394:3 175.07637:2 175.11745:2 177.05345:2 177.12856:55 179.10582:7 181.126…	TRUE	FALSE	FALSE	FALSE	FALSE	TRUE	671.5	671.562	465.312	390.312	1115.69	1254.81	1440.25	1522.62	929.938	1080	1160.06	1121.56	470.812	697.188	550.25	700	0.0005264	0.0010042	0.571024	0.0471372	0.00051	0.0008276
Oxidized phospholipid	OxPE	40:6+4O	18:0	22:6+4O		OxPE 18:0-22:6+4O	C45H78NO12P	ZASKTMNDTKYGQE-ZREGQKFPNA-N	CCCCCCCCCCCCCCCCCC(=O)OCC(COP(O)(=O)OCCN)OC(=O)CCC(O)\C=C\C(O)\C=C\C=C\C=C/C(O)C\C=C\C\C=C/C(C)O	7.66812	854.518	[M-H]-	698	71.06161:1 78.95812:14 81.06837:2 95.05153:6 95.0928:2 99.04763:2 105.06803:2 107.04859:3 109.0668:3 122.00008:3 123.04651:4 123.08251:3 124.0534:4 133.0639:3 135.0816:7 137.09633:3 140.01277:17 145.09863:4 147.08203:4 149.09959:3 151.1066:3 152.99611:5 159.07478:3 161.09569:3 162.06601:3 163.07709:3 165.09055:3 173.10262:4 175.10776:8 176.08189:3 176.09312:4 178.02885:4 179.0677:4 179.11115:4 18…	TRUE	FALSE	FALSE	FALSE	FALSE	TRUE	230.188	271.688	255.375	161	369.75	505.312	537.438	665.75	552	623.312	804.375	1060.31	1245.12	1267.38	1021.62	1599.12	0.0044343	0.0161226	0.0023466	0.110722	0.0012425	0.018965
Oxidized phospholipid	OxPI	34:1+3O	16:0	18:1+3O		OxPI 16:0-18:1+3O	C43H81O16P	KHPXECYDFMPJMP-ZQHSETAFNA-N	CCCCCCCCCCCCCCCC(=O)OCC(COP(O)(=O)OC1C(O)C(O)C(O)C(O)C1O)OC(=O)CCCCCCCC(O)\C=C\C(O)C(O)CCCCC	8.34809	883.518	[M-H]-	5823	78.96095:54 96.97049:20 125.02749:2 134.98732:4 152.9966:73 163.07921:2 171.004:5 177.09445:3 179.18102:3 191.10957:3 195.00497:2 204.98915:2 205.19121:12 214.38092:1 217.20392:2 222.1644:2 223.00009:122 229.19931:1 231.21165:2 236.0273:2 240.25572:6 241.01083:507 251.49872:1 255.22687:38 259.02106:43 259.23911:50 265.02316:1 279.2294:2 280.367:6 281.24655:725 282.25311:4 283.25671:3 285.21921:5 …	TRUE	TRUE	FALSE	FALSE	FALSE	FALSE	5456.06	4140.94	6192.19	5334.5	1892.69	4302.62	2070.12	3632.31	10260.1	11587.9	9348.69	14102.1	5728.19	3496.12	4354.81	1271.38	0.0192918	0.0016506	0.177428	0.0004188	0.529142	0.0015689
Oxidized phospholipid	OxPI	38:6+4O	18:0	20:6+4O		OxPI 18:0-20:6+4O	C47H83O17P	RSJHYTDMKJUCIQ-SZXPTWDZNA-N	CCCCCCCCCCCCCCCCCC(=O)OCC(COP(O)(=O)OC1C(O)C(O)C(O)C(O)C1O)OC(=O)CCC\C=C/CC1C2CC(OO2)C1\C=C\C(CCCCC)OO	7.3661	949.526	[M-H]-	597	109.06989:7 152.98944:17 217.15331:34 223.00374:17 240.98656:7 241.01067:82 251.15654:3 259.02127:17 277.17557:10 283.25516:71 284.26294:10 289.17511:10 297.04285:58 315.04553:20 315.06055:17 331.19058:48 349.19565:14 357.05457:10 383.0647:3 385.08609:17 419.24612:20 419.25769:41 435.20425:3 437.25244:14 479.27521:31 507.311:34 525.28693:3 573.29907:3 581.31018:41 597.2887:10 599.28003:14 599.321…	TRUE	FALSE	FALSE	FALSE	FALSE	TRUE	633.688	791.062	504.562	443.75	547.25	1166.06	926	1134.5	375.562	392.312	516.375	679.812	305.688	490.562	300.312	352.188	0.0736941	0.36443	0.040508	0.0292313	0.0080091	0.172257
Phospholipid	PC	32:0	16:0	16:0		PC 16:0-16:0	C40H80NO8P	KILNVBDSWZSGLL-UHFFFAOYNA-N	CCCCCCCCCCCCCCCC(=O)OCC(COP([O-])(=O)OCC[N+](C)(C)C)OC(=O)CCCCCCCCCCCCCCC	9.79417	792.571	[M+Hac-H]-	5915	168.0426:82 224.06902:61 254.44092:53 255.23154:4276 462.3064:102 480.29892:194 718.54138:2011 733.47876:31 792.56689:153	TRUE	FALSE	FALSE	FALSE	FALSE	FALSE	5102.56	4934.62	5090.25	4808.31	4265.25	5889.25	6270.62	6517.69	6821.5	8100.56	6649.31	6551.25	5201	6165.88	6120	6154.81	0.234913	0.0094168	0.0094627	0.0826318	0.765373	0.0409238
Phospholipid	PC	32:1	16:0	16:1		PC 16:0-16:1	C40H78NO8P	QIBZFHLFHCIUOT-ZPHPHTNENA-N	CCCCCCCCCCCCCCCC(=O)OCC(COP([O-])(=O)OCC[N+](C)(C)C)OC(=O)CCCCCCC\C=C/CCCCCC	9.13811	790.556	[M+Hac-H]-	5443	168.04283:46 224.06487:41 227.20168:56 253.21574:2526 255.22926:1019 281.24966:235 460.28122:36 462.28436:41 462.3056:41 478.26547:10 478.28708:36 480.30115:133 716.52118:1704 731.45288:20 731.48724:25 790.56787:122	TRUE	TRUE	FALSE	FALSE	FALSE	FALSE	8278.56	6758.75	8988.5	7477	2801.75	4943.88	3043.88	5076.25	4953.62	5863.94	5198.56	6620.19	3978.94	4183	4266	4650.88	0.0023424	0.0110078	0.0003748	0.0547765	0.655881	0.0131431
Phospholipid	PC	34:1	16:0	18:1		PC 16:0-18:1	C42H82NO8P	WTJKGGKOPKCXLL-MRCUWXFGNA-N	CCCCCCCCCCCCCCCC(=O)OCC(COP([O-])(=O)OCC[N+](C)(C)C)OC(=O)CCCCCCC\C=C/CCCCCCCC	9.92365	818.59	[M+Hac-H]-	37278	165.80577:10 168.04256:204 224.06851:255 239.01204:10 242.08014:51 253.20827:71 254.43565:41 255.23076:3792 280.37155:89 281.24875:12154 283.25894:61 391.21677:31 462.28232:82 462.29749:173 478.78802:31 480.29898:730 488.31955:102 506.30151:92 673.46637:41 742.2038:41 744.54279:6403 745.53644:31 759.51709:82 818.58649:604	TRUE	TRUE	FALSE	FALSE	FALSE	FALSE	47353.3	33880.9	36256.7	29623.7	25417.3	43581.5	31182.2	36478.9	36989.4	43367.4	36036.3	40285.6	35210.9	40092.4	40411.2	40286.6	0.646096	0.584086	0.597653	0.279641	0.27956	0.938173
Phospholipid	PC	34:2	16:0	18:2		PC 16:0-18:2	C42H80NO8P	JLPULHDHAOZNQI-AKMCNLDWNA-N	CCCCCCCCCCCCCCCC(=O)OCC(COP([O-])(=O)OCC[N+](C)(C)C)OC(=O)CCCCCCC\C=C/C\C=C/CCCCC	9.35282	816.574	[M+Hac-H]-	47186	78.95927:71 152.99448:20 168.04442:294 206.06006:14 224.06885:379 237.21834:7 242.07397:31 253.20876:31 254.4249:27 255.23126:7378 256.22635:10 256.84103:7 261.22162:44 278.3558:99 279.23221:23502 280.23755:41 281.24942:99 327.23746:14 391.19861:14 391.22095:48 406.2774:20 409.22348:14 415.23096:17 419.24869:7 430.26987:24 460.8291:10 462.29935:268 478.77765:7 480.30713:1175 486.29385:150 494.223…	TRUE	FALSE	FALSE	FALSE	FALSE	TRUE	50984.8	55876.9	39931.1	26029.1	33247.4	40645.1	40570.8	40185.6	49367.3	48249.7	56915.2	65322.6	46029.1	54775.8	52736.9	54103.9	0.532854	0.178351	0.255285	0.0095065	0.0026937	0.51683
Phospholipid	PC	34:3	16:0	18:3		PC 16:0-18:3	C42H78NO8P	JMAYDGBZRHQJAT-XSMZTDTHNA-N	CCCCCCCCCCCCCCCC(=O)OCC(COP([O-])(=O)OCC[N+](C)(C)C)OC(=O)CCCCCCC\C=C/C\C=C/C\C=C/CC	9.01434	814.559	[M+Hac-H]-	2416	154.18355:10 168.04074:51 224.07518:31 233.21925:31 242.08276:10 255.23354:479 277.18234:31 277.21759:1236 462.29337:20 480.30414:92 502.28598:20 738.21545:10 740.46368:105 740.51746:1009 755.49036:22 814.54706:112	TRUE	FALSE	FALSE	FALSE	FALSE	TRUE	2839.19	3181.56	2662.81	1347.88	2655.81	4722.38	3891.62	3801.12	1561.12	1331.19	1860.75	2823.12	1249.81	1549.81	1404.88	1776.75	0.0744792	0.28119	0.0511758	0.012962	0.0020664	0.2939
Phospholipid	PC	36:3	16:0	20:3		PC 16:0-20:3	C44H82NO8P	FHYXYDNOQOCPNC-XSMZTDTHNA-N	CCCCCCCCCCCCCCCC(=O)OCC(COP([O-])(=O)OCC[N+](C)(C)C)OC(=O)CCCCCCCCC\C=C/C\C=C/C\C=C/CC	9.59656	842.586	[M+Hac-H]-	4549	224.06877:51 255.23122:885 277.21048:10 279.22748:194 281.24701:61 301.22046:10 305.24509:2196 462.29037:31 480.30112:173 506.31339:31 512.30945:31 530.31122:31 530.33075:31 766.12323:31 768.55829:1813 842.52173:20 842.59546:143	TRUE	FALSE	FALSE	FALSE	FALSE	TRUE	11288.5	7972.25	8649.94	5916.25	1362.19	1803.75	735.188	1997.5	3596.94	3526.19	3953.94	3490.31	4383.44	4617.94	5077.62	4415.81	0.0061814	0.0219684	0.0392401	0.000354	6.64e-05	0.0021965
Phospholipid	PC	36:4	16:0	20:4		PC 16:0-20:4	C44H80NO8P	JAVWFBAAZSHHAD-KKILVFCFNA-N	CCCCCCCCCCCCCCCC(=O)OCC(COP([O-])(=O)OCC[N+](C)(C)C)OC(=O)CCCCCC\C=C/C\C=C/C\C=C/C\C=C/CC	9.305	840.565	[M+Hac-H]-	20349	78.96016:41 152.99248:20 163.0732:20 168.04388:178 177.09203:20 205.19684:112 224.07352:163 226.4538:5 242.07852:31 255.23119:3658 259.24573:504 285.2168:46 302.28082:61 303.23093:9679 389.0639:5 391.21542:20 462.28903:148 480.29941:837 510.29391:71 528.29266:66 695.43469:15 764.1131:46 766.4707:141 766.52148:6216 767.52576:36 781.50092:87 840.55951:638	TRUE	FALSE	TRUE	FALSE	FALSE	TRUE	22217.9	23712.6	24692.6	23733.1	42811.2	54129.6	40304.9	43235	7331.38	7033.56	8959.88	8571	5088.12	3967.56	4694.06	5095.12	0.0052006	5e-07	1e-07	0.0010113	0.0008904	0.0009085
Phospholipid	PC	36:4	16:0	20:4		PC 16:0-20:4	C44H80NO8P	JAVWFBAAZSHHAD-KKILVFCFNA-N	CCCCCCCCCCCCCCCC(=O)OCC(COP([O-])(=O)OCC[N+](C)(C)C)OC(=O)CCCCCC\C=C/C\C=C/C\C=C/C\C=C/CC	9.30812	840.575	[M+Hac-H]-	21276	78.95897:56 83.05295:15 155.10782:20 163.07677:15 168.0421:286 177.08847:20 191.10564:20 205.1915:173 206.05949:25 217.192:15 224.06825:376 231.20825:31 240.01195:5 242.07774:36 254.431:36 255.23286:6020 257.18649:15 257.22269:20 259.24295:981 285.21671:76 301.20013:10 301.21237:25 302.28348:56 303.03708:15 303.23361:16946 304.23199:25 391.22284:61 454.26364:20 462.24979:10 462.29834:324 480.3030…	TRUE	FALSE	TRUE	FALSE	FALSE	TRUE	22288.9	18252.2	15263.5	13255	43694.6	56798.4	57482.7	56971.9	8960.94	8352.75	9590.5	8198.75	5305	5883	5212.88	4902.5	8.28e-05	0.0213183	0.0085327	0.0008277	0.0006946	9.7e-05
Phospholipid	PC	36:5	16:0	20:5		PC 16:0-20:5	C44H78NO8P	KLTHQSWIRFFBRI-KOQZQRJKNA-N	CCCCCCCCCCCCCCCC(=O)OCC(COP([O-])(=O)OCC[N+](C)(C)C)OC(=O)CCC\C=C/C\C=C/C\C=C/C\C=C/C\C=C/CC	8.92108	838.556	[M+Hac-H]-	17617	71.01151:10 78.95547:31 78.95924:41 135.11932:20 149.13408:20 152.99789:31 161.14053:10 168.0425:237 177.08888:31 203.17975:173 215.19249:10 223.17197:51 224.06659:194 227.50339:10 242.08041:44 254.43825:31 255.23335:3525 256.23068:23 257.22543:1242 281.1806:10 283.20007:51 300.27328:31 301.21536:6880 391.22623:31 406.27145:31 462.30203:184 480.30988:793 508.27365:71 526.28589:61 764.51782:5908 7…	TRUE	FALSE	FALSE	TRUE	FALSE	TRUE	2695.69	2513.56	2367.5	1221.94	112.438	124.625	161	155.625	40725.1	51041.1	42584.6	49894.8	20797.1	22175.4	23347.1	21947.2	0.0084275	0.0003767	1e-07	0.0003879	2.96e-05	0.0020316
Phospholipid	PC	38:4	16:0	22:4		PC 16:0-22:4	C46H84NO8P	HUAVKOMRGUBYMK-LTFXTMEVNA-N	CCCCCCCCCCCCCCCC(=O)OCC(COP([O-])(=O)OCC[N+](C)(C)C)OC(=O)CCCCCCCC\C=C/C\C=C/C\C=C/C\C=C/CC	9.92267	868.608	[M+Hac-H]-	520	224.07495:20 253.21077:10 255.24005:235 281.24918:92 303.22922:52 327.23212:21 331.26199:563 462.29611:31 470.87265:10 480.31003:71 513.11102:10 556.34436:10 792.02838:10 794.5719:538 868.56665:51 868.59991:71	TRUE	FALSE	FALSE	FALSE	FALSE	TRUE	369.5	315	234.562	158.375	1146.38	1773.06	1519.75	1843	157.75	152.438	103.188	73.4375	108.938	121.938	123.938	113.812	0.0002142	0.0264195	0.0455509	0.0024418	0.0026843	0.838287
Phospholipid	PC	38:6	16:0	22:6		PC 16:0-22:6	C46H80NO8P	IESVDEZGAHUQJU-SYGPSSPWNA-N	CCCCCCCCCCCCCCCC(=O)OCC(COP([O-])(=O)OCC[N+](C)(C)C)OC(=O)CC\C=C/C\C=C/C\C=C/C\C=C/C\C=C/C\C=C/CC	9.2159	864.574	[M+Hac-H]-	47467	71.1438:10 78.95322:31 78.95824:51 107.08385:41 117.68936:10 121.10121:41 131.08752:10 137.13136:31 147.11664:41 149.12927:31 152.99127:31 163.07753:31 168.03922:239 177.16251:82 187.15186:31 189.16475:51 191.18256:102 203.17413:31 206.0563:41 217.19496:21 224.06915:341 229.19467:471 241.19038:31 242.08307:51 249.18375:153 254.42972:31 255.23384:5839 263.6655:10 282.3559:33 283.24332:3071 297.225…	TRUE	FALSE	FALSE	FALSE	TRUE	TRUE	31320.7	25639.6	34009.6	18808.4	30552.2	31433.9	42081.3	38644.6	47634.4	47185.1	56038.1	52740.5	59838.4	78064.9	73629.7	91852.1	0.10909	0.0010616	0.0006132	0.0049324	0.0013749	0.0113786
Phospholipid	PC	34:3	16:1	18:2		PC 16:1-18:2	C42H78NO8P	QJWDAOSZZYVBJZ-BOAYSYCPNA-N	CCCCCC\C=C/CCCCCCCC(=O)OCC(COP([O-])(=O)OCC[N+](C)(C)C)OC(=O)CCCCCCC\C=C/C\C=C/CCCCC	8.81286	814.549	[M+Hac-H]-	2238	78.96074:4 152.99457:2 165.13789:2 168.0408:16 224.06874:16 242.06725:3 243.59978:1 252.43007:4 253.21756:349 255.22882:2 261.21457:2 278.35553:6 279.23196:1067 280.23727:4 281.25626:2 283.2641:3 301.22504:2 303.23404:2 322.95792:2 375.67929:1 383.03064:1 389.20514:6 404.2515:2 410.77133:2 417.24536:2 448.91458:1 460.27414:15 478.28287:65 486.28049:8 500.84076:1 504.29813:9 504.32028:8 669.44263:…	FALSE	TRUE	FALSE	FALSE	FALSE	TRUE	3705	2516.44	3677.88	3253.38	1389.56	2098	1063.25	2099.19	2302.75	2079.75	2301.75	2628.81	1445.06	1660.38	1479.69	2102.44	0.0052417	0.018463	0.0021803	0.0574636	0.97613	0.0131711
Phospholipid	PC	36:6	16:1	20:5		PC 16:1-20:5	C44H76NO8P	IITWSVMUNFGFQI-MPAQOSGJNA-N	CCCCCC\C=C/CCCCCCCC(=O)OCC(COP([O-])(=O)OCC[N+](C)(C)C)OC(=O)CCC\C=C/C\C=C/C\C=C/C\C=C/C\C=C/CC	8.47693	836.546	[M+Hac-H]-	486	180.11143:10 224.06639:31 253.21062:286 257.22748:92 277.21478:10 283.19745:21 301.21265:472 460.28937:51 478.29535:71 762.49762:545 777.51678:10 836.51813:61 836.55896:41	FALSE	TRUE	FALSE	TRUE	FALSE	TRUE	103.375	179.188	122.5	57.25	173.875	173.625	55.75	64.125	1611	1321.88	1151.94	891	357.625	431.875	523.812	554.188	0.976641	0.0042869	0.0004807	0.0039005	0.000744	0.0026242
Phospholipid	PC	37:4	17:0	20:4		PC 17:0-20:4	C45H82NO8P	HTEFXTFZCGTMAC-PHEBCRHUNA-N	CCCCCCCCCCCCCCCCC(=O)OCC(COP([O-])(=O)OCC[N+](C)(C)C)OC(=O)CCCCCC\C=C/C\C=C/C\C=C/C\C=C/CC	9.71511	854.588	[M+Hac-H]-	493	163.07513:5 205.19981:20 222.99684:5 224.07272:20 257.22299:10 259.23871:36 261.18707:5 269.25012:265 303.23154:520 368.97098:5 476.31052:20 491.05014:5 494.31985:66 780.55408:544 854.57178:66	TRUE	FALSE	TRUE	FALSE	FALSE	TRUE	372.938	379.375	355.5	207.125	1136.5	1288.62	1453.12	1404.94	226	213.875	191.562	215.188	106.438	100.812	107.75	122	1.86e-05	0.0620783	0.0120678	0.0005039	0.0004113	2.01e-05
Phospholipid	PC	36:1	18:0	18:1		PC 18:0-18:1	C44H86NO8P	ATHVAWFAEPLPPQ-LNVKXUELNA-N	CCCCCCCCCCCCCCCCCC(=O)OCC(COP([O-])(=O)OCC[N+](C)(C)C)OC(=O)CCCCCCC\C=C/CCCCCCCC	11	846.613	[M+Hac-H]-	3249	168.03696:20 224.06865:37 253.21527:17 255.23329:27 280.36722:17 281.24442:1748 282.37665:14 283.26175:544 305.16101:3 309.27878:54 488.30557:20 490.32184:31 506.32544:20 508.34036:99 771.61517:10 772.58356:1367 773.58398:10 787.54291:20 846.60858:126 846.62915:153	TRUE	TRUE	FALSE	FALSE	FALSE	FALSE	4252.06	6895.19	5461.44	4112.75	1649.19	2699	1753.56	2488.62	3026.38	3695.5	2950.81	3367.38	2079.06	2558	2609.06	2379.69	0.0048467	0.0284275	0.0213581	0.0120077	0.403512	0.0064475
Phospholipid	PC	36:2	18:0	18:2		PC 18:0-18:2	C44H84NO8P	FORFDCPQKJHEBF-IUFKAHDJNA-N	CCCCCCCCCCCCCCCCCC(=O)OCC(COP([O-])(=O)OCC[N+](C)(C)C)OC(=O)CCCCCCC\C=C/C\C=C/CCCCC	10.2267	844.592	[M+Hac-H]-	14521	168.04121:82 224.06889:71 279.22943:3538 281.24426:31 283.26392:1371 303.23373:41 307.25934:41 486.28522:41 490.32294:41 504.31232:41 508.33817:206 770.56409:3221 771.57104:31 785.492:41 794.54614:51 844.52679:51 844.60059:345	TRUE	FALSE	FALSE	FALSE	FALSE	TRUE	18424.2	31385.6	24848.8	17629.3	6263.88	10621	6231.44	5689.38	9684.75	14284.6	15467.9	20385.5	12067.5	10953.9	12809	15591.2	0.0034741	0.0819279	0.0227001	0.020395	0.0096984	0.417006
Phospholipid	PC	36:2	18:0	18:2		PC 18:0-18:2	C44H84NO8P	FORFDCPQKJHEBF-IUFKAHDJNA-N	CCCCCCCCCCCCCCCCCC(=O)OCC(COP([O-])(=O)OCC[N+](C)(C)C)OC(=O)CCCCCCC\C=C/C\C=C/CCCCC	10.2227	844.606	[M+Hac-H]-	16314	78.95959:31 168.04074:56 224.06853:87 255.23303:15 278.35046:15 279.23157:3460 283.26373:1252 298.21268:5 303.22375:25 419.25006:20 486.29193:46 490.32031:51 504.30338:41 508.32602:247 768.11975:20 770.55792:2721 771.56097:20 785.51746:41 844.55334:77 844.57385:228 844.6026:291	TRUE	FALSE	FALSE	FALSE	FALSE	TRUE	18607.9	24586.6	18503.2	7962.5	7429.75	10222.6	10062.2	9397.25	17820.4	20821.3	20306.3	25360.2	14775.5	18630.9	17397.5	19138.8	0.0979537	0.372057	0.984949	0.0004389	0.0004122	0.100059
Phospholipid	PC	38:3	18:0	20:3		PC 18:0-20:3	C46H86NO8P	LLUINWFQEIMZRU-JOIBFBEQNA-N	CCCCCCCCCCCCCCCCCC(=O)OCC(COP([O-])(=O)OCC[N+](C)(C)C)OC(=O)CCCCCCCCC\C=C/C\C=C/C\C=C/CC	10.5666	870.614	[M+Hac-H]-	1559	141.01787:4 168.0459:12 184.11751:2 224.06395:10 276.61551:2 279.2312:6 283.26099:202 303.22092:6 304.28326:6 305.2464:655 306.25055:4 432.76514:2 441.2334:4 490.32306:10 508.33517:39 508.37653:4 512.30353:8 526.96692:2 530.31812:6 794.04248:6 796.58124:543 797.56519:4 811.53278:12 811.56091:8 870.61292:59 870.69202:6	TRUE	FALSE	FALSE	FALSE	FALSE	TRUE	3320.38	4419	3759.88	2442.38	327.5	525.812	366.75	491.125	1199.19	1277.44	1154.94	1080.75	1027.38	999.688	1273.88	1280.19	0.0048019	0.0110145	0.0096667	2.14e-05	0.0002077	0.718184
Phospholipid	PC	38:3	18:0	20:3		PC 18:0-20:3	C46H86NO8P	LLUINWFQEIMZRU-JOIBFBEQNA-N	CCCCCCCCCCCCCCCCCC(=O)OCC(COP([O-])(=O)OCC[N+](C)(C)C)OC(=O)CCCCCCCCC\C=C/C\C=C/C\C=C/CC	10.5731	870.626	[M+Hac-H]-	1201	144.13834:2 168.04076:18 224.07091:18 242.08708:4 255.23119:2 261.25803:8 277.22922:2 279.2439:4 283.26428:253 287.24643:4 298.91302:2 305.24991:796 328.97781:2 419.25421:6 434.30634:4 490.31573:8 508.33096:53 512.29614:6 512.34088:4 530.29767:4 530.32367:10 751.56586:4 794.05829:4 796.58105:697 797.58893:14 811.49652:4 811.5528:14 816.10535:2 870.60889:69	TRUE	FALSE	FALSE	FALSE	FALSE	TRUE	2601.06	2745.19	1762	1055.81	298.812	471	483.25	583.438	1169.25	1428.81	1135.5	896.75	936.188	1227.69	1349.31	1068.31	0.0262246	0.0736836	0.104693	0.0013323	0.000712	0.934083
Phospholipid	PC	38:4	18:0	20:4		PC 18:0-20:4	C46H84NO8P	HAKKEJDMTIQLJH-WKUHSSGJNA-N	CCCCCCCCCCCCCCCCCC(=O)OCC(COP([O-])(=O)OCC[N+](C)(C)C)OC(=O)CCCCCC\C=C/C\C=C/C\C=C/C\C=C/CC	10.1697	868.601	[M+Hac-H]-	13476	78.95544:31 168.04454:173 205.19026:102 224.067:245 242.0743:31 257.21466:10 259.23944:487 282.38446:65 283.26245:3849 285.2298:51 297.27167:10 301.22342:36 302.2749:41 302.85168:30 303.23239:9727 419.25821:31 490.32336:122 490.34213:122 508.3356:888 510.2908:71 528.29309:61 528.32874:51 749.51196:31 792.06628:61 794.57001:7451 795.58063:51 809.54303:82 836.1178:10 868.60645:863	TRUE	FALSE	TRUE	FALSE	FALSE	TRUE	10688.2	15924.2	15135.4	11649.6	32373.9	32694.3	33202.9	34628.1	4850.62	4833.69	5171.56	4836.56	1799.38	2487	2372.44	2971	6.9e-06	0.0070588	0.002755	7.5e-06	0	6.19e-05
Phospholipid	PC	38:5	18:0	20:5		PC 18:0-20:5	C46H82NO8P	ZMNDHWFRGYCJKG-AASFMASFNA-N	CCCCCCCCCCCCCCCCCC(=O)OCC(COP([O-])(=O)OCC[N+](C)(C)C)OC(=O)CCC\C=C/C\C=C/C\C=C/C\C=C/C\C=C/CC	9.64331	866.588	[M+Hac-H]-	4964	78.95924:20 168.03883:102 203.16365:20 203.18176:82 224.0666:122 255.22885:31 257.22546:430 282.37909:22 283.26181:1824 288.41214:23 300.26352:31 301.21536:3324 302.21533:31 305.23996:20 329.23373:20 490.30945:82 508.26413:41 508.2832:82 508.33411:457 526.29236:51 526.31183:31 790.06738:20 792.55212:4304 793.55743:51 807.49811:61 866.58356:390	TRUE	FALSE	FALSE	TRUE	FALSE	TRUE	1222.25	1803.5	973.812	527.062	2701.75	4410.12	4081.62	3721.75	10702.8	12418.6	10715	9855.25	3374.62	4732.25	3838.88	4344.06	0.0012632	3.4e-06	0.0003153	3.32e-05	0.495606	3.08e-05
Phospholipid	PC	40:5	18:0	22:5		PC 18:0-22:5	C48H86NO8P	MAAMGQXOTCBPFS-CYDMDVBXNA-N	CCCCCCCCCCCCCCCCCC(=O)OCC(COP([O-])(=O)OCC[N+](C)(C)C)OC(=O)CCCCC\C=C/C\C=C/C\C=C/C\C=C/C\C=C/CC	10.2923	894.617	[M+Hac-H]-	828	152.99629:3 168.03716:10 168.04265:15 224.07095:25 231.20886:10 282.37686:8 283.26193:295 285.25311:36 303.23181:20 309.27402:13 329.21591:23 329.24921:737 490.33136:15 508.33414:66 536.30627:13 554.3158:13 820.58569:862 821.58032:10 835.54779:13 894.58154:38 894.62372:89	TRUE	FALSE	FALSE	FALSE	FALSE	TRUE	337.812	410.375	343.625	172.812	435.75	443.062	360.188	418.938	1863.06	2551.31	2058.19	2304.56	439.062	328.75	367.375	417.188	0.118017	2.12e-05	0.248584	0.0011218	0.42915	0.0009776
Phospholipid	PC	40:5	18:0	22:5		PC 18:0-22:5	C48H86NO8P	MAAMGQXOTCBPFS-CYDMDVBXNA-N	CCCCCCCCCCCCCCCCCC(=O)OCC(COP([O-])(=O)OCC[N+](C)(C)C)OC(=O)CCCCC\C=C/C\C=C/C\C=C/C\C=C/C\C=C/CC	10.6648	894.622	[M+Hac-H]-	326	224.06862:20 231.2151:20 283.26193:173 285.25549:102 289.39557:5 329.22119:41 329.24936:322 485.52304:5 508.34146:71 820.59222:447 894.63507:61	TRUE	FALSE	FALSE	FALSE	FALSE	TRUE	164.688	240.812	141.625	68.25	648.562	1219.88	1005.56	1020.56	162.375	132.688	108.5	124.25	29.25	56.125	43.375	42.5	0.0005778	0.578645	0.0505911	0.0055296	0.0042832	0.0003952
Phospholipid	PC	40:6	18:0	22:6		PC 18:0-22:6	C48H84NO8P	FAUYAENFVCNTAL-UFTZFNJNNA-N	CCCCCCCCCCCCCCCCCC(=O)OCC(COP([O-])(=O)OCC[N+](C)(C)C)OC(=O)CC\C=C/C\C=C/C\C=C/C\C=C/C\C=C/C\C=C/CC	10.0256	892.601	[M+Hac-H]-	9963	135.11772:15 160.08383:5 168.04265:61 177.16042:15 191.17456:25 213.62051:5 224.06694:56 229.19458:71 242.08083:15 249.18593:31 283.26001:926 326.20248:43 327.23541:1430 437.24707:15 490.3421:56 507.12106:10 508.32922:307 534.29034:41 552.30286:20 815.95911:20 818.56897:2666 819.57043:20 833.53723:46 833.57391:20 892.57721:123 892.61517:242	TRUE	FALSE	FALSE	FALSE	TRUE	TRUE	5457.25	8720.25	7382.56	5523.69	5018.19	6985.62	7749.44	6806.75	8863.31	11325.4	10551.6	11608	14811.9	16995.6	14949.3	16656.2	0.897811	0.0088254	8.45e-05	0.0034277	2.75e-05	0.0007519
Phospholipid	PC	36:3	18:1	18:2		PC 18:1-18:2	C44H82NO8P	GDWULUGDXGHJIJ-RWLIYIGXNA-N	CCCCCCCC\C=C/CCCCCCCC(=O)OCC(COP([O-])(=O)OCC[N+](C)(C)C)OC(=O)CCCCCCC\C=C/C\C=C/CCCCC	9.44521	842.587	[M+Hac-H]-	5085	168.04805:56 224.06897:71 266.09735:5 278.952:11 279.23251:2602 280.92801:11 281.24734:1513 305.24301:15 486.30423:36 488.30704:46 504.3002:71 506.3143:138 697.47565:15 766.10535:20 768.55603:2217 769.55383:25 783.50818:31 842.58911:211	FALSE	TRUE	FALSE	FALSE	FALSE	TRUE	8686.25	8610.25	6673.44	5489.88	1600.19	1655.19	1601.56	1995.12	6281.06	5774.5	4974.06	4455.69	5217.81	6558.56	6672.56	5111.38	0.0050098	0.0638953	0.146828	0.002079	0.0015357	0.409192
Phospholipid	PC	38:4	18:1	20:3		PC 18:1-20:3	C46H84NO8P	JNKAOGSDBBXHEP-SAUDALOUNA-N	CCCCCCCC\C=C/CCCCCCCC(=O)OCC(COP([O-])(=O)OCC[N+](C)(C)C)OC(=O)CCCCCCCCC\C=C/C\C=C/C\C=C/CC	9.69027	868.601	[M+Hac-H]-	1202	224.07034:25 255.22345:15 256.23883:15 277.22089:5 279.22842:41 281.24796:304 283.26053:10 286.2749:10 302.22357:15 305.2063:16 305.2482:1052 307.2532:20 329.24457:15 417.2251:15 488.30426:25 504.71545:5 506.31119:76 512.31036:15 526.284:5 794.55737:883 868.5921:92	FALSE	TRUE	FALSE	FALSE	FALSE	TRUE	2062.31	1338.81	1362.31	1230.06	506.438	681.438	642.938	812.312	1833.5	2171.88	1403.81	1770	723.625	898.312	921.938	867.062	0.0058047	0.275055	0.0391247	0.0005405	0.0471133	0.0011928
Phospholipid	PC	38:5	18:1	20:4		PC 18:1-20:4	C46H82NO8P	SWOKEJBWARJLGN-LTLPGSJDNA-N	CCCCCCCC\C=C/CCCCCCCC(=O)OCC(COP([O-])(=O)OCC[N+](C)(C)C)OC(=O)CCCCCC\C=C/C\C=C/C\C=C/C\C=C/CC	9.40912	866.579	[M+Hac-H]-	5319	168.04475:66 205.19823:36 224.07094:51 255.23102:184 259.24106:122 280.37411:16 281.24661:785 285.25745:36 303.23129:1693 329.24591:515 462.2822:10 478.47299:5 480.29572:51 488.30692:51 506.31717:226 510.29361:20 528.30548:25 792.55151:2089 793.5528:25 807.49738:25 866.5575:253	FALSE	TRUE	TRUE	FALSE	FALSE	TRUE	4690.62	4953.62	5293	6069.44	4984	6608.81	5063.5	5994.06	7699.62	8871.19	9121.38	8758.31	2074.44	1334.12	1428.25	2153.31	0.435132	0.0002419	7.56e-05	0.0010579	0.0001186	1.8e-06
Phospholipid	PC	40:7	18:1	22:6		PC 18:1-22:6	C48H82NO8P	FPEVDFOXMCHLKL-MIIHFGKENA-N	CCCCCCCC\C=C/CCCCCCCC(=O)OCC(COP([O-])(=O)OCC[N+](C)(C)C)OC(=O)CC\C=C/C\C=C/C\C=C/C\C=C/C\C=C/C\C=C/CC	9.27891	890.586	[M+Hac-H]-	2637	168.04323:37 177.16661:14 191.18289:14 224.06738:20 227.18292:3 229.18858:27 249.18629:24 253.82048:3 281.24295:484 283.246:269 309.2251:7 327.23038:688 417.24081:14 488.3096:31 506.32318:170 521.28461:3 534.28955:14 552.31189:20 745.47882:7 813.96307:10 816.5495:1380 817.51343:7 817.54974:10 831.49121:17 831.51562:24 890.56915:184	FALSE	TRUE	FALSE	FALSE	TRUE	TRUE	2618.5	2347.62	2203.12	2004.69	1219.19	1482.12	1763.75	1287	2991.81	2939.12	2737.62	1979.88	3939	3971.75	4580.75	4132.06	0.0029568	0.216919	7.8e-05	0.0035421	7.7e-06	0.0016655
Phospholipid	PC	36:4	18:2	18:2		PC 18:2-18:2	C44H80NO8P	FVXDQWZBHIXIEJ-ZPPAUJSGNA-N	CCCCC\C=C/C\C=C/CCCCCCCC(=O)OCC(COP([O-])(=O)OCC[N+](C)(C)C)OC(=O)CCCCCCC\C=C/C\C=C/CCCCC	8.96658	840.569	[M+Hac-H]-	4870	168.03355:15 224.07115:25 277.21313:51 279.20184:16 279.23483:639 281.24731:133 305.25281:36 504.30923:41 766.52612:433 840.58624:61	FALSE	FALSE	FALSE	FALSE	FALSE	TRUE	4608.31	3058.62	3558.44	3250	1299.44	1774.5	1888.06	1504.38	7364.38	9786.19	7380.38	8690.12	5357.94	5928	6819.19	5656.19	0.00165	0.0004531	0.0025433	0.0009635	1.5e-05	0.0118245
Phospholipid	PC	36:5	18:2	18:3		PC 18:2-18:3	C44H78NO8P	HZGAVPNEGHQJID-OFWSBFIXNA-N	CCCCC\C=C/C\C=C/CCCCCCCC(=O)OCC(COP([O-])(=O)OCC[N+](C)(C)C)OC(=O)CCCCCCC\C=C/C\C=C/C\C=C/CC	8.6098	838.555	[M+Hac-H]-	864	168.04231:10 224.06618:10 254.21716:3 277.21436:150 278.35492:14 279.23135:426 281.23196:7 283.25162:7 486.29486:7 502.27103:17 502.28998:31 764.51843:308 779.49432:14 838.51599:20 838.55682:54	FALSE	FALSE	FALSE	FALSE	FALSE	TRUE	692.188	598.125	489.812	467.25	669.5	883.25	728.438	881.938	1002.12	1098.44	951.812	1185.56	760.25	1038.75	1058.12	1316.69	0.0226995	0.0005052	0.0084359	0.0116988	0.0917742	0.902115
Phospholipid	PC	36:5	18:2	18:3		PC 18:2-18:3	C44H78NO8P	HZGAVPNEGHQJID-OFWSBFIXNA-N	CCCCC\C=C/C\C=C/CCCCCCCC(=O)OCC(COP([O-])(=O)OCC[N+](C)(C)C)OC(=O)CCCCCCC\C=C/C\C=C/C\C=C/CC	8.75478	838.563	[M+Hac-H]-	5305	127.07832:2 158.97546:4 168.03723:6 224.0687:12 277.21478:147 279.22232:253 279.23413:439 283.24014:4 303.24115:6 413.20511:4 468.96255:2 484.29037:10 486.30457:10 502.29034:31 502.33463:4 504.30042:6 762.10168:6 764.5108:333 765.52942:4 779.45911:6 779.49451:8 838.53247:35	FALSE	FALSE	FALSE	FALSE	FALSE	TRUE	1075.69	696.812	934	625.938	1254.44	1807.38	1881.31	2275.56	619.5	23977.7	11468.9	9735.06	5268.31	6634	7433.75	9194.81	0.006079	0.114169	0.0041912	0.1383	0.000749	0.437803
Phospholipid	PC	38:6	18:2	20:4		PC 18:2-20:4	C46H80NO8P	RUHBZJXWUDKAMZ-ODAJXHQSNA-N	CCCCC\C=C/C\C=C/CCCCCCCC(=O)OCC(COP([O-])(=O)OCC[N+](C)(C)C)OC(=O)CCCCCC\C=C/C\C=C/C\C=C/C\C=C/CC	8.95823	864.574	[M+Hac-H]-	3159	168.04451:41 205.19191:41 224.06435:41 229.20473:10 256.23486:10 259.23627:122 272.40317:21 279.23154:913 301.2196:10 303.1991:42 303.23102:2069 486.27591:31 504.25217:20 504.30603:184 510.30933:31 528.3183:31 790.45544:71 790.52686:1781 791.51099:22 805.4978:71 864.55243:185 864.58563:216	FALSE	FALSE	TRUE	FALSE	FALSE	TRUE	3181.19	1770.25	2147.69	1793.56	3255.31	4360	5299.38	4711.06	4526.06	5829.56	3780.19	2775.62	1512.56	1753.69	2204.31	1643.44	0.0069188	0.0323453	0.266872	0.825105	0.0011818	0.0285568
Phospholipid	PC	38:7	18:2	20:5		PC 18:2-20:5	C46H78NO8P	HRBNRYBXXRPMKP-OMCHRGCMNA-N	CCCCC\C=C/C\C=C/CCCCCCCC(=O)OCC(COP([O-])(=O)OCC[N+](C)(C)C)OC(=O)CCC\C=C/C\C=C/C\C=C/C\C=C/C\C=C/CC	8.59139	862.56	[M+Hac-H]-	2177	78.95456:8 168.02814:5 168.04643:31 177.09103:8 203.17998:33 224.07101:51 242.07181:8 243.01671:3 257.23013:166 259.24588:8 277.2175:18 278.37689:8 279.2345:1047 283.20493:15 301.21542:1180 303.22684:23 486.29007:36 504.31104:150 508.26691:15 526.2887:41 786.00232:10 788.44897:36 788.52026:1860 789.53888:10 803.44434:10 803.48035:31 862.55786:156	FALSE	FALSE	FALSE	TRUE	FALSE	TRUE	1493.25	741.875	885.375	921.375	863.562	1188.62	1237.31	1120.56	3534.38	3751.81	3256.75	2811.81	2910.94	3331.94	3292.31	3498.06	0.636955	0.0001125	3.6e-05	5.16e-05	6.9e-06	0.746776
Phospholipid	PE	34:1	16:0	18:1		PE 16:0-18:1	C39H76NO8P	FHQVHHIBKUMWTI-ZCXUNETKNA-N	CCCCCCCCCCCCCCCC(=O)OCC(COP(O)(=O)OCCN)OC(=O)CCCCCCC\C=C/CCCCCCCC	10.0786	716.518	[M-H]-	2992	140.01106:31 191.16847:10 196.03534:41 253.22438:82 255.23567:446 257.67606:10 281.24933:1190 283.25952:41 434.28012:31 452.26993:61 478.30539:31 716.50989:253	TRUE	TRUE	FALSE	FALSE	FALSE	FALSE	3936.69	3546.81	5029.12	3618.88	1960.88	3264.06	1670.31	2931.19	3450.88	3742.56	3180.44	3001.69	1937.44	2292.19	2372.5	1934.94	0.0217674	0.11896	0.0019204	0.0757432	0.448974	0.0008967
Phospholipid	PE	34:2	16:0	18:2		PE 16:0-18:2	C39H74NO8P	HBZNVZIRJWODIB-BCTRXSSUNA-N	CCCCCCCCCCCCCCCC(=O)OCC(COP(O)(=O)OCCN)OC(=O)CCCCCCC\C=C/C\C=C/CCCCC	9.47789	714.503	[M-H]-	17734	78.95968:46 128.66605:5 140.01329:92 196.03389:122 214.04784:20 253.2226:32 255.23163:1871 261.2197:31 278.36554:44 279.23254:5822 434.25085:31 452.27005:236 458.25815:25 476.27399:36 714.4411:20 714.5014:1521	TRUE	FALSE	FALSE	FALSE	FALSE	TRUE	19848.2	21495.4	25135.2	17990.3	12468.4	15641.2	14470.8	13992.1	19046.9	16681.8	18900.8	25998.5	13533.1	15807	14863.7	17866.5	0.0055928	0.717127	0.0195233	0.0299584	0.267049	0.0812927
Phospholipid	PE	36:4	16:0	20:4		PE 16:0-20:4	C41H74NO8P	NQIMLWFRWGTTOZ-JAXHXWBXNA-N	CCCCCCCCCCCCCCCC(=O)OCC(COP(O)(=O)OCCN)OC(=O)CCCCCC\C=C/C\C=C/C\C=C/C\C=C/CC	9.44123	738.503	[M-H]-	23153	78.96012:92 137.09775:21 140.01256:208 177.09253:31 196.03926:265 205.19597:173 214.04735:41 231.21527:31 255.23131:4572 259.24139:692 279.23468:51 285.21042:61 285.22711:51 302.27951:41 303.23212:8801 434.26617:133 452.27377:717 482.2706:71 500.27768:82 736.16772:31 738.50873:2926	TRUE	FALSE	TRUE	FALSE	FALSE	TRUE	38814.8	32705.8	36621.6	36072.2	32966.7	40991.3	38556.1	40271.9	10777.8	9663.44	9733.56	9183.88	7532.94	8736.06	9099.75	8726.25	0.370217	1e-06	8e-07	0.0004144	0.0003548	0.0333859
Phospholipid	PE	36:5	16:0	20:5		PE 16:0-20:5	C41H72NO8P	KHLRCNXJXSYNCK-LPHKCNJWNA-N	CCCCCCCCCCCCCCCC(=O)OCC(COP(O)(=O)OCCN)OC(=O)CCC\C=C/C\C=C/C\C=C/C\C=C/C\C=C/CC	9.01609	736.49	[M-H]-	10507	78.95869:36 121.99907:25 140.00996:127 177.16434:15 196.03755:148 203.17993:122 209.89372:5 219.14537:5 223.17204:46 226.3132:5 254.43587:20 255.23099:2021 256.23282:22 257.22531:547 271.20538:15 281.19214:5 283.20215:25 301.21494:2884 434.27252:87 452.27707:329 480.24933:36 498.26291:41 736.48273:1476	TRUE	FALSE	FALSE	TRUE	FALSE	TRUE	1606.44	1085.12	1194.12	850.5	41.625	55.4375	47.9375	59.5625	28015.8	30479.6	26627.8	27048.2	11489.6	11549.6	13641.1	14317.3	0.0055692	4.63e-05	0.000339	6.43e-05	0.0004029	9.9e-06
Phospholipid	PE	38:4	16:0	22:4		PE 16:0-22:4	C43H78NO8P	ICYDFONFTSPCRL-BHYOAKPMNA-N	CCCCCCCCCCCCCCCC(=O)OCC(COP(O)(=O)OCCN)OC(=O)CCCCCCCC\C=C/C\C=C/C\C=C/C\C=C/CC	10.0826	766.536	[M-H]-	1049	126.04928:5 140.01106:20 188.93735:5 196.03929:36 233.22993:15 254.42705:10 255.23341:390 283.25003:10 283.26428:41 287.26794:36 287.49759:5 303.22937:46 305.24255:10 330.23312:11 331.26215:944 430.70312:5 434.26834:20 452.26694:87 479.21307:5 508.83408:5 528.31134:15 766.49011:93 766.54089:498	TRUE	FALSE	FALSE	FALSE	FALSE	TRUE	1564	969.125	819.25	1138.5	1621.44	2722.19	2271.88	2755.62	426.438	266.188	567.25	450.438	284.25	285.438	360.625	276.5	0.0076207	0.0068672	0.0138252	0.0041379	0.0043872	0.101073
Phospholipid	PE	38:5	16:0	22:5		PE 16:0-22:5	C43H76NO8P	BXSFSSDQHFBPDQ-SFVLIGPRNA-N	CCCCCCCCCCCCCCCC(=O)OCC(COP(O)(=O)OCCN)OC(=O)CCCCC\C=C/C\C=C/C\C=C/C\C=C/C\C=C/CC	9.53925	764.521	[M-H]-	15529	78.96088:51 140.00821:102 196.03775:133 231.21129:82 251.20573:53 254.43866:31 255.23152:1552 259.24612:82 280.36768:21 281.24725:562 283.25272:31 285.25339:276 301.22064:52 301.24023:21 303.237:986 309.2197:10 328.21591:32 329.24945:3045 434.26541:71 452.2789:355 478.28986:153 508.27066:31 526.31519:41 764.51379:1920	TRUE	FALSE	FALSE	FALSE	FALSE	TRUE	24927.8	18393.7	18260.8	16559.8	15453.6	19075.2	21646.7	27245.9	16432.1	18850.7	16407.2	17697.8	4046.06	4226.56	4885.88	4358.38	0.684302	0.30138	0.0035696	0.253783	0.0067759	7e-07
Phospholipid	PE	38:6	16:0	22:6		PE 16:0-22:6	C43H74NO8P	MPWUZHVZZKSTPV-LGFBOSHVNA-N	CCCCCCCCCCCCCCCC(=O)OCC(COP(O)(=O)OCCN)OC(=O)CC\C=C/C\C=C/C\C=C/C\C=C/C\C=C/C\C=C/CC	9.33238	762.503	[M-H]-	73165	78.96075:173 93.07156:61 96.96512:41 105.06389:20 107.08675:82 109.10238:51 117.06869:41 119.08795:41 121.09964:82 122.00034:82 123.11877:31 131.08749:31 133.10001:61 135.11635:92 137.12804:31 139.57933:42 140.01309:611 141.82878:10 146.07278:10 147.11661:41 149.13612:41 152.98949:41 161.1319:51 163.07568:61 163.14417:71 173.13277:31 173.38164:10 175.15115:82 177.09485:31 177.16621:194 178.02367:…	TRUE	FALSE	FALSE	FALSE	TRUE	TRUE	61655	55073.9	66556.6	65478.7	38650.6	55561.4	66779.8	69261.8	64827.1	76554.6	74615.9	82763.6	95088.2	94292.9	98940.3	104539	0.556842	0.03301	4.86e-05	0.0733437	0.0014773	0.001737
Phospholipid	PE	34:3	16:1	18:2		PE 16:1-18:2	C39H72NO8P	SSRRIJSEUKHYFB-RUGCENDANA-N	CCCCCC\C=C/CCCCCCCC(=O)OCC(COP(O)(=O)OCCN)OC(=O)CCCCCCC\C=C/C\C=C/CCCCC	8.90327	712.485	[M-H]-	928	134.9807:5 253.21483:219 257.16608:5 279.22885:668 450.26117:36 458.28766:5 712.48511:173	FALSE	TRUE	FALSE	FALSE	FALSE	TRUE	1663.94	1087.69	1811.62	1390.56	451.75	642.062	645.25	704.25	935.188	883.688	949.938	1097.62	545.875	563.5	755.375	714.438	0.002012	0.0199832	0.0024036	0.0025275	0.671363	0.0036992
Phospholipid	PE	36:5	16:1	20:4		PE 16:1-20:4	C41H72NO8P	CXGZFWPMXPAZEA-NUNQZGBLNA-N	CCCCCC\C=C/CCCCCCCC(=O)OCC(COP(O)(=O)OCCN)OC(=O)CCCCCC\C=C/C\C=C/C\C=C/C\C=C/CC	8.86982	736.486	[M-H]-	4564	140.01814:31 249.19215:21 253.21529:278 259.23203:41 285.22183:21 303.23145:528 447.02371:10 450.26041:51 647.88867:10 736.47266:279	FALSE	TRUE	TRUE	FALSE	FALSE	TRUE	3058.94	1740.81	3075.81	2939.88	1767.62	2564.56	2290.44	3517.88	7944.44	15381.8	9306.25	625.312	7679.81	5270.31	388.188	5464.75	0.741554	0.160816	0.286816	0.152015	0.255591	0.328508
Phospholipid	PE	36:6	16:1	20:5		PE 16:1-20:5	C41H70NO8P	LEBOQMHVVYOZDX-DVKFGTQTNA-N	CCCCCC\C=C/CCCCCCCC(=O)OCC(COP(O)(=O)OCCN)OC(=O)CCC\C=C/C\C=C/C\C=C/C\C=C/C\C=C/CC	8.54352	734.474	[M-H]-	641	78.96076:12 91.64235:2 123.12191:4 135.12291:2 140.01309:16 152.98773:4 158.97729:6 163.15137:4 177.0892:4 195.13191:4 196.03766:29 203.1841:18 214.04971:4 215.18867:2 223.17229:6 229.19455:4 251.20341:2 253.22015:315 255.22467:4 257.23032:88 281.26849:2 283.19092:4 300.27606:6 301.21814:443 318.22397:2 376.22708:4 389.2225:4 432.23599:12 432.2536:8 450.25571:61 464.87555:4 476.30161:2 480.24524:…	FALSE	TRUE	FALSE	TRUE	FALSE	TRUE	197	87.375	48.5	88.875	34.25	43.4375	47.625	53.3125	1681.31	1872.19	1843.5	1975.25	453.375	547.812	610.625	673.188	0.15243	3e-07	0.0001759	8.04e-05	0.001431	3.1e-06
Phospholipid	PE	38:7	16:1	22:6		PE 16:1-22:6	C43H72NO8P	PMUXXFUNXMXIFC-LSTLUVPYNA-N	CCCCCC\C=C/CCCCCCCC(=O)OCC(COP(O)(=O)OCCN)OC(=O)CC\C=C/C\C=C/C\C=C/C\C=C/C\C=C/C\C=C/CC	8.77402	760.49	[M-H]-	1999	140.01106:31 189.16998:10 196.03712:51 229.20033:72 252.41403:42 253.21272:472 283.24237:194 295.20865:10 327.22641:434 432.25821:31 450.22742:31 450.26035:102 760.48303:402	FALSE	TRUE	FALSE	FALSE	TRUE	TRUE	2501.81	1515.12	1947.62	1447.06	1123.69	1267.25	1791.31	1594.44	1569.5	2031.81	2470.38	2413.94	2426.12	2440.44	2198.38	3239.88	0.203773	0.433592	0.0730478	0.0391791	0.0061423	0.19121
Phospholipid	PE	37:4	17:0	20:4		PE 17:0-20:4	C42H76NO8P	CKWQBCHPEQMNNL-UMWXEKTDNA-N	CCCCCCCCCCCCCCCCC(=O)OCC(COP(O)(=O)OCCN)OC(=O)CCCCCC\C=C/C\C=C/C\C=C/C\C=C/CC	9.86857	752.519	[M-H]-	712	140.00609:20 190.83302:10 196.04518:31 259.24564:51 269.24557:265 302.27655:21 303.23404:488 466.28769:51 632.90802:10 752.49799:104 752.52509:322	TRUE	FALSE	TRUE	FALSE	FALSE	TRUE	907.312	618.688	1056.31	476.562	972.5	1280	1377.31	1777.94	404.75	581.062	454.312	319.75	270.25	292.125	326.188	274.25	0.0326094	0.0636376	0.0364748	0.0019872	0.0075641	0.068375
Phospholipid	PE	39:6	17:0	22:6		PE 17:0-22:6	C44H76NO8P	WVGREBRFGJNLSB-KAFSZNKPNA-N	CCCCCCCCCCCCCCCCC(=O)OCC(COP(O)(=O)OCCN)OC(=O)CC\C=C/C\C=C/C\C=C/C\C=C/C\C=C/C\C=C/CC	9.72861	776.518	[M-H]-	650	229.1924:31 257.15112:21 269.24835:249 281.2496:10 283.24557:122 297.17892:10 327.23251:277 423.2511:10 448.27005:31 466.28537:61 572.11359:21 716.57782:21 776.50342:220 776.5152:419	TRUE	FALSE	FALSE	FALSE	TRUE	TRUE	333.125	291.062	326.25	247.375	312.938	423.75	465.062	520.062	649	675.5	659.25	752.562	1220.88	897.375	1265.56	1355.94	0.0343783	1.56e-05	0.0023847	0.0022244	0.0004521	0.0128349
Phospholipid	PE	36:1	18:0	18:1		PE 18:0-18:1	C41H80NO8P	JQKOHRZNEOQNJE-ZZEZOPTANA-N	CCCCCCCCCCCCCCCCCC(=O)OCC(COP(O)(=O)OCCN)OC(=O)CCCCCCC\C=C/CCCCCCCC	11.2068	744.55	[M-H]-	756	127.00985:5 140.00638:15 252.15913:5 255.22682:25 280.36041:10 281.24945:519 283.2644:229 305.03558:5 309.27905:46 478.31128:10 480.3161:51 744.55359:239	TRUE	TRUE	FALSE	FALSE	FALSE	FALSE	782.5	915.875	788.875	565.688	379.688	624.938	539.688	645.688	746.938	1052.69	897.375	1038.81	609.5	834.312	887	783.062	0.0625948	0.145092	0.877025	0.0061736	0.0352237	0.147335
Phospholipid	PE	36:2	18:0	18:2		PE 18:0-18:2	C41H78NO8P	YDTWOEYVDRKKCR-MLWYYCKJNA-N	CCCCCCCCCCCCCCCCCC(=O)OCC(COP(O)(=O)OCCN)OC(=O)CCCCCCC\C=C/C\C=C/CCCCC	10.3997	742.538	[M-H]-	9515	78.9572:31 140.01317:66 196.0356:107 278.33441:10 279.23203:5560 280.23734:15 282.37195:20 283.26416:2101 307.26712:36 458.24799:20 460.87048:5 462.30133:76 474.76517:5 476.27283:25 480.30289:308 740.18451:25 742.46655:25 742.53577:1501	TRUE	FALSE	FALSE	FALSE	FALSE	TRUE	9950.69	11843.2	9017	6116	4228	6845.25	5583.88	5952.62	10499.9	10063.7	12122.5	17161.2	8827.5	11199.3	10444.7	12379.4	0.0342152	0.160655	0.332834	0.0073873	0.001526	0.366173
Phospholipid	PE	38:3	18:0	20:3		PE 18:0-20:3	C43H80NO8P	MSYFXMJDQLPRGO-JTBMWNAQNA-N	CCCCCCCCCCCCCCCCCC(=O)OCC(COP(O)(=O)OCCN)OC(=O)CCCCCCCCC\C=C/C\C=C/C\C=C/CC	10.7599	768.549	[M-H]-	1057	140.0061:8 196.02942:10 217.03236:4 249.02739:2 261.2511:6 277.21741:4 282.36487:4 283.26419:188 287.24396:6 299.03494:2 304.27438:6 305.24982:564 419.24261:4 440.95953:4 462.27475:4 462.30206:10 480.2728:4 480.30371:27 484.27625:6 502.28238:8 526.92377:4 536.95343:2 768.54553:240	TRUE	FALSE	FALSE	FALSE	FALSE	TRUE	1659.94	1538.56	2130.56	1356.06	234.562	401.062	373.5	518	1050.44	1192.69	1045.62	1261.31	930.688	960.312	1089.94	1163.81	0.0003231	0.0219055	0.010758	7.5e-05	0.0001794	0.234221
Phospholipid	PE	38:4	18:0	20:4		PE 18:0-20:4	C43H78NO8P	YEHAZLUVAZKVRO-ZKVKLVECNA-N	CCCCCCCCCCCCCCCCCC(=O)OCC(COP(O)(=O)OCCN)OC(=O)CCCCCC\C=C/C\C=C/C\C=C/C\C=C/CC	10.3453	766.538	[M-H]-	39494	78.9521:7 78.95837:44 92.02513:3 121.99734:14 140.01154:109 177.08179:10 178.01996:10 191.10452:17 196.03773:190 203.17612:10 205.19637:92 214.05183:20 217.18869:10 225.18356:10 231.20267:24 259.23929:431 273.21503:10 282.36758:24 283.26453:3389 285.21997:44 301.21814:17 302.28189:37 303.23203:6752 304.23532:20 406.27167:14 419.25436:10 439.2251:10 462.29916:105 480.3038:571 482.26944:58 498.6965…	TRUE	FALSE	TRUE	FALSE	FALSE	TRUE	54049.6	46886.4	42562.4	28140.2	53350.4	77156.2	71532.6	87992.6	22538.1	22419.4	23520	25010.6	15463.6	22371.9	20123	18782.1	0.0171892	0.0365353	0.005697	0.0063288	0.0042196	0.0366906
Phospholipid	PE	38:5	18:0	20:5		PE 18:0-20:5	C43H76NO8P	MOJMRZJNAPRFBD-GLWDABGQNA-N	CCCCCCCCCCCCCCCCCC(=O)OCC(COP(O)(=O)OCCN)OC(=O)CCC\C=C/C\C=C/C\C=C/C\C=C/C\C=C/CC	9.78696	764.518	[M-H]-	17381	78.96056:41 140.00964:102 151.14503:20 177.09294:31 196.03372:214 203.18213:112 214.05183:31 221.1492:10 223.17238:31 229.20107:41 256.4187:21 257.22821:716 283.21967:46 283.26477:3096 301.216:3812 462.29401:102 480.24298:82 480.30173:554 486.29779:10 498.24396:51 762.10675:41 764.52368:2006	TRUE	FALSE	FALSE	TRUE	FALSE	TRUE	2221.44	2610.81	2892.88	2196.88	3463.5	5844.56	5421.12	6378.69	43537.9	46997.6	38994.1	47951.9	13706.9	17831.1	16978.3	21075.7	0.0053427	0.0002298	0.0020447	1.7e-06	0.0003171	4.02e-05
Phospholipid	PE	40:4	18:0	22:4		PE 18:0-22:4	C45H82NO8P	TVACGFJBGVEGCR-PYQGTGCGNA-N	CCCCCCCCCCCCCCCCCC(=O)OCC(COP(O)(=O)OCCN)OC(=O)CCCCCCCC\C=C/C\C=C/C\C=C/C\C=C/CC	11.219	794.572	[M-H]-	365	134.99466:5 140.00941:25 196.03531:41 221.52029:5 265.2551:5 283.26175:340 287.27017:20 303.22916:10 330.23547:16 331.2619:704 462.29285:15 480.30051:46 794.56714:378	TRUE	FALSE	FALSE	FALSE	FALSE	TRUE	230.938	259.812	229.438	112.875	647.875	1165.81	1209.75	1483.56	60.5	63.875	61.75	69.9375	44.75	64.5	64.75	77.75	0.0118223	0.0211116	0.0186209	0.0088735	0.008795	0.884622
Phospholipid	PE	40:5	18:0	22:5		PE 18:0-22:5	C45H80NO8P	KYERVKWKQQBRQB-NIZIMQIGNA-N	CCCCCCCCCCCCCCCCCC(=O)OCC(COP(O)(=O)OCCN)OC(=O)CCCCC\C=C/C\C=C/C\C=C/C\C=C/C\C=C/CC	10.4574	792.552	[M-H]-	2446	78.96185:41 127.08286:10 196.03549:71 231.21315:41 243.21028:10 273.59042:10 283.26434:980 285.2579:112 288.94211:10 306.08871:21 328.21826:22 329.24667:1723 462.30219:31 478.79596:10 480.31003:153 508.28336:31 526.30225:31 731.56305:10 792.55219:1164	TRUE	FALSE	FALSE	FALSE	FALSE	TRUE	1172.44	1089.25	1127.62	752.062	914.125	1437.38	1024.06	1418.81	5440.12	7071.56	5487.56	8626.44	674.312	887.812	969.812	1039.12	0.361127	0.0046637	0.295227	0.0047119	0.0976215	0.0044512
Phospholipid	PE	40:5	18:0	22:5		PE 18:0-22:5	C45H80NO8P	KYERVKWKQQBRQB-NIZIMQIGNA-N	CCCCCCCCCCCCCCCCCC(=O)OCC(COP(O)(=O)OCCN)OC(=O)CCCCC\C=C/C\C=C/C\C=C/C\C=C/C\C=C/CC	10.8656	792.553	[M-H]-	631	78.96044:14 137.12938:3 140.00612:17 175.96786:3 193.40298:3 196.03741:54 215.18639:3 231.21101:44 239.37033:3 243.21249:10 283.2644:443 285.26035:143 329.24426:586 462.2692:7 462.29953:20 480.30115:68 508.29333:10 526.2865:10 792.55719:448	TRUE	FALSE	FALSE	FALSE	FALSE	TRUE	283.312	301.25	260.062	166.812	1022.88	1805.31	1866.5	2187.31	379.188	301.438	345.188	472.688	114.938	178.688	146.562	256.75	0.0089837	0.0413783	0.114869	0.0112269	0.0077068	0.0055189
Phospholipid	PE	40:6	18:0	22:6		PE 18:0-22:6	C45H78NO8P	XYYHNDVKALDFHQ-HSBBONCLNA-N	CCCCCCCCCCCCCCCCCC(=O)OCC(COP(O)(=O)OCCN)OC(=O)CC\C=C/C\C=C/C\C=C/C\C=C/C\C=C/C\C=C/CC	10.1949	790.537	[M-H]-	20446	76.48164:10 78.95569:61 93.07014:20 95.08742:41 105.07251:41 109.10085:31 119.09251:10 121.10112:51 121.99871:31 131.09227:10 133.09505:31 135.11464:31 137.12796:20 137.14282:42 140.01135:292 147.11481:20 149.12915:31 157.10229:10 161.13002:20 163.14587:41 175.15105:51 177.16423:153 191.17847:82 193.11674:31 196.03954:354 201.16769:31 203.18401:41 207.13303:31 214.04135:31 217.19891:31 229.19872:…	TRUE	FALSE	FALSE	FALSE	TRUE	TRUE	9429.31	10472.4	9512	5692.25	8479.94	11668.8	12220.8	15272.1	17484.4	26460.2	21749.2	34311.6	29880.6	31929.6	35789.5	46775.9	0.122804	0.0049812	0.0004282	0.0147045	0.0009442	0.0774136
Phospholipid	PE	36:3	18:1	18:2		PE 18:1-18:2	C41H76NO8P	GKAFCSRKMWFPSJ-RQOIEFAZNA-N	CCCCCCCC\C=C/CCCCCCCC(=O)OCC(COP(O)(=O)OCCN)OC(=O)CCCCCCC\C=C/C\C=C/CCCCC	9.57369	740.517	[M-H]-	5872	106.11931:10 140.00627:61 184.9825:10 196.0276:31 196.03748:92 278.36279:22 279.20148:57 279.23215:3149 281.24698:1284 458.26074:41 460.27765:71 476.27048:31 478.29883:173 740.46649:93 740.52789:919	FALSE	TRUE	FALSE	FALSE	FALSE	TRUE	9933.19	6081	9869.5	9714.56	2632.75	3322.25	1868.69	3829.25	6573.38	6006.62	6430.56	5313.69	4865	5314.31	6669.12	5527.12	0.0011539	0.0284428	0.0173892	0.0008131	0.0034151	0.346389
Phospholipid	PE	38:5	18:1	20:4		PE 18:1-20:4	C43H76NO8P	ZYMZKMQPPJPQHY-HAGCXRLMNA-N	CCCCCCCC\C=C/CCCCCCCC(=O)OCC(COP(O)(=O)OCCN)OC(=O)CCCCCC\C=C/C\C=C/C\C=C/C\C=C/CC	9.53577	764.511	[M-H]-	14320	78.95605:31 139.99977:20 140.01144:102 154.08916:10 196.03735:133 205.19189:71 231.20424:41 231.24071:10 254.43114:21 255.233:392 259.23627:330 281.21082:31 281.24869:2047 285.21667:41 285.25241:51 301.21469:31 303.23346:4267 329.24307:674 452.26776:61 460.27271:71 477.55029:21 478.28137:367 482.25171:41 500.27405:61 518.95477:10 764.51715:2147	FALSE	TRUE	TRUE	FALSE	FALSE	TRUE	23601.5	17694.5	23439.2	23504.8	13565.9	19206.2	14222.1	20122.5	12690.1	15452.8	15124.6	15861.2	3657.75	3478.31	3812.06	3681.44	0.0551859	0.004149	0.0010474	0.316217	0.0043395	0.0005246
Phospholipid	PE	38:6	18:1	20:5		PE 18:1-20:5	C43H74NO8P	AMKOUQLHUASJMB-HHHWHCSPNA-N	CCCCCCCC\C=C/CCCCCCCC(=O)OCC(COP(O)(=O)OCCN)OC(=O)CCC\C=C/C\C=C/C\C=C/C\C=C/C\C=C/CC	9.07812	762.504	[M-H]-	4974	71.14495:3 78.95944:44 109.10081:3 121.10108:10 123.1218:14 140.01295:71 147.11816:10 149.5498:3 163.07191:7 175.16403:3 177.09277:10 178.02534:10 196.03548:102 203.17986:105 214.04329:20 217.12393:10 223.17206:34 229.1879:10 257.20514:31 257.22549:482 266.10614:11 279.23441:14 280.36966:14 281.24689:1920 283.2001:17 297.24908:3 300.27084:14 301.21536:2449 302.21286:14 303.22678:37 327.22952:14 4…	FALSE	TRUE	FALSE	TRUE	FALSE	TRUE	1921.12	846.438	1837.25	1237.62	1136.94	1891.06	1814.31	1983.5	13222	14475	12359.5	8301.88	3597.25	4415.94	5551.31	4988.88	0.471284	0.003373	0.0006327	0.0039406	0.0006989	0.0017838
Phospholipid	PE	40:7	18:1	22:6		PE 18:1-22:6	C45H76NO8P	JZSZAGWWWKKXLO-HILQMKNTNA-N	CCCCCCCC\C=C/CCCCCCCC(=O)OCC(COP(O)(=O)OCCN)OC(=O)CC\C=C/C\C=C/C\C=C/C\C=C/C\C=C/C\C=C/CC	9.42747	788.521	[M-H]-	12128	71.36514:3 78.9593:37 93.07001:14 107.07926:7 107.08803:14 108.06416:3 115.04682:3 121.09945:10 121.9986:17 127.07967:7 133.10144:14 135.11453:10 137.12454:7 137.2204:3 140.00957:85 145.10048:3 149.13422:20 152.99629:10 161.13173:14 163.1476:17 169.12723:7 175.14725:10 177.16605:34 178.0235:7 179.1001:10 187.96904:3 189.17035:14 191.18039:31 196.03752:146 203.17392:17 210.4297:3 214.0434:17 229.1…	FALSE	TRUE	FALSE	FALSE	TRUE	TRUE	12164.8	6003.38	9609.44	8781.69	5473.75	6744.31	7683.75	8571.5	12003.4	14039.8	15023.4	11259.1	16001.2	18031.7	20649.3	22014.1	0.207787	0.0430683	0.0016147	0.0016109	0.0001961	0.0089281
Phospholipid	PE	36:4	18:2	18:2		PE 18:2-18:2	C41H74NO8P	SSCDRSKJTAQNNB-MAZCIEHSNA-N	CCCCC\C=C/C\C=C/CCCCCCCC(=O)OCC(COP(O)(=O)OCCN)OC(=O)CCCCCCC\C=C/C\C=C/CCCCC	8.9149	738.51	[M-H]-	855	97.46715:10 257.21448:10 260.21252:21 279.22534:333 283.26932:143 458.26752:20 660.61377:20 738.50348:311	FALSE	FALSE	FALSE	FALSE	FALSE	TRUE	691.625	432.062	462.812	405.625	296.312	439.125	451.875	610.25	2624.44	724.25	2132.75	898.375	643.062	977.688	1020.94	865.812	0.615072	0.0981653	0.0121967	0.0892393	0.0068924	0.220315
Phospholipid	PG	40:8	20:4	20:4		PG 20:4-20:4	C46H75O10P	YICHHSJHMIIOIM-CKKCRWTANA-N	CC\C=C/C\C=C/C\C=C/C\C=C/CCCCCCC(=O)OCC(COP(O)(=O)OCC(O)CO)OC(=O)CCCCCC\C=C/C\C=C/C\C=C/C\C=C/CC	7.91297	817.501	[M-H]-	582	74.99068:20 91.02042:82 149.01012:56 150.994:15 165.03996:382 205.19817:20 223.02675:735 239.05617:300 259.24146:36 277.22946:5 279.22998:56 281.26849:5 297.05002:31 303.23206:384 313.07001:41 327.23508:20 513.28424:5 817.50214:202	FALSE	FALSE	TRUE	FALSE	FALSE	TRUE	447.938	461.438	549.562	424.625	680.188	1172.31	1103.44	1386.44	340.875	388.312	503.312	456.812	262.125	325.188	371.812	431.312	0.0233447	0.32366	0.0338762	0.0177188	0.0129146	0.191579
Phospholipid	PG	31:1	17:0	14:1		PG 17:0-14:1	C37H71O10P	CCMFBKQDCGRHJC-BENRWUELNA-N	CCCCCCCCCCCCCCCCC(=O)OCC(COP(O)(=O)OCC(O)CO)OC(=O)CCCCCCC\C=C/CCCC	8.10752	705.468	[M-H]-	4614	78.95824:35 96.97063:6 117.92661:2 142.57903:2 152.99449:129 168.03522:6 171.00766:61 209.01538:12 224.48273:29 225.18515:3192 227.03314:45 228.37025:4 245.04417:6 251.23862:6 253.22182:2 255.23085:6 268.40094:8 269.24536:1373 283.26144:4 361.17111:18 376.94067:2 382.74857:4 405.23318:98 423.24677:6 435.21439:45 453.21729:33 479.27332:73 481.44733:8 483.44632:6 495.72821:4 497.27823:114 618.34503…	TRUE	TRUE	FALSE	FALSE	FALSE	FALSE	4508.25	4441.56	4639.5	4592.81	3366.38	4908.62	4750.31	4376.19	4899.88	5616.88	4345.5	5612.88	3611.5	4739	5124.94	4286.38	0.614185	0.158981	0.769089	0.148467	0.855887	0.180627
Phospholipid	PG	34:2	16:0	18:2		PG 16:0-18:2	C40H75O10P	ATBOMIWRCZXYSZ-BCTRXSSUNA-N	CCCCCCCCCCCCCCCC(=O)OCC(COP(O)(=O)OCC(O)CO)OC(=O)CCCCCCC\C=C/C\C=C/CCCCC	8.37501	745.498	[M-H]-	1435	103.841:10 152.99651:82 156.98573:10 227.0338:20 245.05598:10 252.97795:21 255.23167:513 278.33975:21 279.23499:1170 391.22708:51 463.24698:10 465.25961:41 483.26547:61 489.25186:20 743.50073:10 745.49884:715	TRUE	FALSE	FALSE	FALSE	FALSE	TRUE	1075.12	1187.38	1403.62	715.438	1042.81	1796.81	1603.88	1928.88	1177.75	1400.69	1616.75	1777.31	1347.75	1735	1357.06	1789.94	0.0859139	0.0864009	0.0480783	0.685055	0.881147	0.728049
Phospholipid	PG	34:1	16:0	18:1		PG 16:0-18:1	C40H77O10P	PAZGBAOHGQRCBP-ZCXUNETKNA-N	CCCCCCCCCCCCCCCC(=O)OCC(COP(O)(=O)OCC(O)CO)OC(=O)CCCCCCC\C=C/CCCCCCCC	8.65187	747.514	[M-H]-	3849	78.95932:31 152.99454:76 169.90062:5 171.00407:41 209.03604:5 227.02922:20 255.23355:673 279.23694:26 280.36749:16 281.24469:2025 389.99948:5 391.22372:66 417.24026:15 463.37692:5 465.25287:31 465.2681:41 483.271:66 491.28192:20 509.29562:15 673.52094:31 747.44849:25 747.5141:1325	TRUE	TRUE	FALSE	FALSE	FALSE	FALSE	4615.12	5019.31	5697.12	5640.12	2656.5	4270.69	4085.19	4568.5	3165.69	3496.06	3041.94	3148.69	2121.31	3561	2963.12	3538.31	0.0352174	0.0003332	0.0021004	0.206913	0.16864	0.651498
Phospholipid	PG	36:2	18:0	18:2		PG 18:0-18:2	C42H79O10P	JPRWHUSRRGNLOV-MLWYYCKJNA-N	CCCCCCCCCCCCCCCCCC(=O)OCC(COP(O)(=O)OCC(O)CO)OC(=O)CCCCCCC\C=C/C\C=C/CCCCC	8.803	773.533	[M-H]-	747	152.99821:20 195.07851:10 245.03543:21 255.2422:10 279.23407:376 281.24182:10 283.25674:133 307.26181:41 391.22247:10 482.9838:10 493.30237:31 507.27991:10 691.52069:10 773.53729:336	TRUE	FALSE	FALSE	FALSE	FALSE	TRUE	397.812	638.312	569.625	305.938	423.812	643.438	1317.38	968.75	643.125	596.812	1013.12	1054.31	662.188	914.625	825.25	984.375	0.136074	0.0497393	0.0118274	0.961582	0.969449	0.891422
Phospholipid	PI	34:1	16:0	18:1		PI 16:0-18:1	C43H81O13P	PDLAMJKMOKWLAJ-ZCXUNETKNA-N	CCCCCCCCCCCCCCCC(=O)OCC(COP(O)(=O)OC1C(O)C(O)C(O)C(O)C1O)OC(=O)CCCCCCC\C=C/CCCCCCCC	8.58623	835.536	[M-H]-	657	96.96973:10 139.03009:3 152.995:44 214.09929:3 222.99947:37 241.0127:99 253.2043:7 255.22903:146 259.01877:14 281.24692:167 283.26898:27 293.21246:3 297.03992:17 341.10541:10 391.22012:78 409.23114:10 415.21848:3 417.24796:14 419.25925:10 553.26501:54 571.26794:14 579.28522:17 835.52405:841	TRUE	TRUE	FALSE	FALSE	FALSE	FALSE	541.625	479.375	277.062	126.5	409.375	565	249.938	424.5	1013.31	983.062	773.562	594.125	1056.69	1003.25	1133.06	879.438	0.642911	0.0120818	0.0009077	0.010647	0.0003519	0.16372
Phospholipid	PI	34:2	16:0	18:2		PI 16:0-18:2	C43H79O13P	BSNJSZUDOMPYIR-BCTRXSSUNA-N	CCCCCCCCCCCCCCCC(=O)OCC(COP(O)(=O)OC1C(O)C(O)C(O)C(O)C1O)OC(=O)CCCCCCC\C=C/C\C=C/CCCCC	8.31105	833.516	[M-H]-	5850	78.96072:51 96.96645:25 152.99452:97 222.99911:143 241.008:609 244.34683:10 255.19943:21 255.23099:847 259.01846:66 279.23184:936 297.03241:92 315.03473:31 315.04974:51 391.22574:380 409.23407:36 415.21283:51 553.27875:389 571.27191:61 577.24994:31 577.28387:82 595.28137:20 671.45172:25 830.84583:20 833.52002:4715	TRUE	FALSE	FALSE	FALSE	FALSE	TRUE	4673.62	5001.12	3687.19	2059.06	3248.69	5832.12	4320.56	4719.25	6342.81	6242.06	6488.5	7507.94	7485.88	8431.31	8296.5	9266.75	0.457047	0.0083341	0.0009786	0.0131842	0.0010152	0.010175
Phospholipid	PI	36:4	16:0	20:4		PI 16:0-20:4	C45H79O13P	VWRYMIZQLPXULA-JAXHXWBXNA-N	CCCCCCCCCCCCCCCC(=O)OCC(COP(O)(=O)OC1C(O)C(O)C(O)C(O)C1O)OC(=O)CCCCCC\C=C/C\C=C/C\C=C/C\C=C/CC	8.30016	857.517	[M-H]-	14250	78.9579:148 96.97036:46 134.9882:25 152.99626:293 171.0041:20 205.2003:56 217.19902:21 223.00371:440 241.01068:1916 254.43646:27 255.23383:2346 259.01682:163 259.23941:209 285.2178:25 297.03812:306 302.27975:21 303.23236:2385 304.23813:16 313.02786:5 315.04572:153 379.30746:5 391.22446:1075 409.23569:107 439.22906:148 553.27148:1146 571.28485:318 601.27228:212 619.27197:31 619.29303:71 693.63892:…	TRUE	FALSE	TRUE	FALSE	FALSE	TRUE	21797.2	24682.6	14865.4	9948.62	15033.7	30174.4	21344.8	26764.1	8935.38	7398.88	8047.12	10281.2	6495.31	7876.06	6995.44	7361	0.285772	0.0687077	0.0491648	0.0194098	0.0160443	0.0746295
Phospholipid	PI	36:5	16:0	20:5		PI 16:0-20:5	C45H77O13P	FQGSWQFJOVVRRB-LPHKCNJWNA-N	CCCCCCCCCCCCCCCC(=O)OCC(COP(O)(=O)OC1C(O)C(O)C(O)C(O)C1O)OC(=O)CCC\C=C/C\C=C/C\C=C/C\C=C/C\C=C/CC	8.08701	855.502	[M-H]-	2544	78.96119:15 152.99841:25 189.0134:5 220.18697:5 222.99307:20 241.00604:76 255.23344:122 257.22778:20 283.25702:87 284.2648:51 297.02521:20 297.04224:20 301.21277:87 391.21161:46 480.30246:46 481.31107:25 553.27478:66 571.26105:15 599.27368:15 837.49487:15 837.51935:10 852.79083:10 855.48773:666	TRUE	FALSE	FALSE	TRUE	FALSE	TRUE	288.875	415.062	347.625	216.125	198.5	329.062	191	262.062	5537.25	7684.25	5316.5	8025.19	2902.69	2637.56	2491.06	3864.06	0.225989	0.0028661	0.0029406	0.0028002	0.0028505	0.0031253
Phospholipid	PI	38:6	16:0	22:6		PI 16:0-22:6	C47H79O13P	FPHAZHKZJQOPBU-LGFBOSHVNA-N	CCCCCCCCCCCCCCCC(=O)OCC(COP(O)(=O)OC1C(O)C(O)C(O)C(O)C1O)OC(=O)CC\C=C/C\C=C/C\C=C/C\C=C/C\C=C/C\C=C/CC	8.24413	881.515	[M-H]-	2757	72.43348:3 78.95923:51 96.96626:15 152.99281:102 163.14941:8 177.16422:10 191.17264:13 222.99948:140 229.19243:38 241.00845:601 248.0379:3 255.23152:752 256.23111:8 259.02356:64 283.24094:209 297.04291:105 315.04562:54 327.23276:450 391.22147:362 409.2355:38 463.18936:13 463.22278:48 553.27777:416 571.27771:117 625.26569:71 643.27472:18 807.51227:10 878.71521:25 881.42346:18 881.51147:5919	TRUE	FALSE	FALSE	FALSE	TRUE	TRUE	1244	694.562	673.25	509.688	606.688	887.25	790.812	639.75	1854.31	2363	2131.25	2502.62	6416.44	7205.5	7066.5	8522.75	0.785366	0.0005373	8.7e-06	7.87e-05	0.0005368	3.4e-05
Phospholipid	PI	37:4	17:0	20:4		PI 17:0-20:4	C46H81O13P	NHCUHDJVBAQLLF-UMWXEKTDNA-N	CCCCCCCCCCCCCCCCC(=O)OCC(COP(O)(=O)OC1C(O)C(O)C(O)C(O)C1O)OC(=O)CCCCCC\C=C/C\C=C/C\C=C/C\C=C/CC	8.4934	871.531	[M-H]-	787	78.95988:4 96.97221:3 141.01944:2 152.9957:8 205.19257:2 222.99953:11 241.01038:47 256.23734:1 259.02295:6 259.241:7 269.24533:65 283.2565:5 285.21426:2 289.21478:4 297.03427:11 303.22589:62 304.23654:2 312.16547:1 315.04391:4 403.25684:2 405.23697:33 419.25116:2 421.20355:1 423.25046:4 439.2186:6 546.94336:1 567.29108:30 579.06677:1 585.28668:14 599.30365:2 601.26721:9 709.46979:3 789.54901:2 79…	TRUE	FALSE	TRUE	FALSE	FALSE	TRUE	737.062	1096.81	654.125	756.875	971.5	1047.75	1114.06	1209.88	870.188	801.5	623.312	616.125	497.25	432.562	561.125	597.75	0.0468793	0.50194	0.0323817	0.0046167	0.0001023	0.0314025
Phospholipid	PI	36:2	18:0	18:2		PI 18:0-18:2	C45H83O13P	KZVRAFHIKMDULK-MLWYYCKJNA-N	CCCCCCCCCCCCCCCCCC(=O)OCC(COP(O)(=O)OC1C(O)C(O)C(O)C(O)C1O)OC(=O)CCCCCCC\C=C/C\C=C/CCCCC	8.74335	861.543	[M-H]-	4573	78.95962:37 96.97079:10 134.98691:4 152.99655:79 161.04424:2 204.98622:2 210.39099:1 223.00165:113 235.86011:1 241.01064:459 253.21346:2 255.23599:8 258.14087:2 259.02124:44 261.21954:3 278.36304:4 278.37717:4 279.23239:632 280.22827:3 281.24249:5 283.26456:738 284.2652:6 285.27002:2 295.21436:2 297.00623:3 297.03784:81 307.24777:2 307.26755:7 315.02283:3 315.04785:28 333.05981:2 387.56235:1 391.…	TRUE	FALSE	FALSE	FALSE	FALSE	TRUE	2372.5	3244.81	4106.56	2818.5	2361.75	2877	2498.81	1887.75	7597	5620.19	5263.12	4808.5	6022.69	6891	7252.69	7548.38	0.134822	0.0095411	0.0002602	0.0018741	2.43e-05	0.163877
Phospholipid	PI	38:3	18:0	20:3		PI 18:0-20:3	C47H85O13P	GGSSNEAFVQRIHU-JTBMWNAQNA-N	CCCCCCCCCCCCCCCCCC(=O)OCC(COP(O)(=O)OC1C(O)C(O)C(O)C(O)C1O)OC(=O)CCCCCCCCC\C=C/C\C=C/C\C=C/CC	9.0772	887.559	[M-H]-	653	152.99654:27 222.9882:7 223.00085:41 233.22505:3 241.00963:129 259.01544:14 261.2525:14 283.26062:238 297.03613:31 305.24588:262 419.25391:109 437.26605:20 441.23459:20 581.30701:92 599.31116:27 603.27277:20 725.49548:14 887.48218:39 887.56201:1551	TRUE	FALSE	FALSE	FALSE	FALSE	TRUE	2394.62	1768.19	1703.88	1531.25	34.875	36.75	25.5	66.0625	840.688	337.812	220.062	165.812	277.812	226.75	440	375.875	0.0023659	0.0009727	0.0027957	0.107411	0.007943	0.718536
Phospholipid	PI	38:3	18:0	20:3		PI 18:0-20:3	C47H85O13P	GGSSNEAFVQRIHU-JTBMWNAQNA-N	CCCCCCCCCCCCCCCCCC(=O)OCC(COP(O)(=O)OC1C(O)C(O)C(O)C(O)C1O)OC(=O)CCCCCCCCC\C=C/C\C=C/C\C=C/CC	8.93101	887.564	[M-H]-	4254	78.95708:51 152.99631:153 210.96605:10 222.99905:163 239.00342:10 241.01228:528 259.00247:11 259.02289:71 283.26385:796 284.25977:41 297.03467:133 302.33755:21 305.24939:850 315.04456:61 419.25897:314 437.26254:82 441.24884:71 579.44135:10 581.2973:410 599.28076:31 599.31531:102 603.29425:112 621.28864:31 725.49725:41 887.55273:7016	TRUE	FALSE	FALSE	FALSE	FALSE	TRUE	6594.12	5044.31	4205.06	3024.31	117.062	165.625	193.875	250.062	4663.12	5881.5	4116.69	5404.75	5663.69	6140.44	8923.88	7675.06	0.0090324	0.735424	0.0649094	0.0010922	0.0026067	0.0477933
Phospholipid	PI	38:4	18:0	20:4		PI 18:0-20:4	C47H83O13P	OJESNYFIPWSOPO-ZKVKLVECNA-N	CCCCCCCCCCCCCCCCCC(=O)OCC(COP(O)(=O)OC1C(O)C(O)C(O)C(O)C1O)OC(=O)CCCCCC\C=C/C\C=C/C\C=C/C\C=C/CC	8.73066	885.544	[M-H]-	71534	77.76272:10 78.9593:187 96.96909:71 152.998:341 171.00591:41 205.19614:71 222.99931:638 241.01045:2836 259.02106:255 259.23911:300 282.37695:54 283.2644:3791 284.26984:50 285.21747:41 297.03772:535 302.28671:34 303.23193:3375 304.2254:31 315.04529:194 419.25449:2025 435.29816:10 437.26691:194 439.22232:297 457.23773:31 525.27362:31 581.30298:2013 599.32111:511 601.27783:418 619.27753:82 723.49512…	TRUE	FALSE	TRUE	FALSE	FALSE	TRUE	64668.1	92547.1	97896.1	90229.4	76504.2	98221.5	91156.4	94723.2	66764.7	48810.4	63093.9	68840.4	43229.3	43682.1	49227.6	54942.6	0.679836	0.0302803	0.0027512	0.0050711	0.0002526	0.0371268
Phospholipid	PI	38:5	18:0	20:5		PI 18:0-20:5	C47H81O13P	SUYDNPBYMBTSMM-GLWDABGQNA-N	CCCCCCCCCCCCCCCCCC(=O)OCC(COP(O)(=O)OC1C(O)C(O)C(O)C(O)C1O)OC(=O)CCC\C=C/C\C=C/C\C=C/C\C=C/C\C=C/CC	8.47146	883.532	[M-H]-	7505	78.95939:97 96.97054:51 152.99797:168 203.17976:41 223.00334:260 223.17195:20 229.18779:20 241.01022:1166 257.22763:194 259.02307:122 283.26407:1736 284.2695:25 297.03979:184 301.21521:1148 313.2742:5 315.04736:87 419.25668:654 437.21304:97 437.25729:56 525.27911:25 581.30524:722 599.21283:15 599.24396:127 599.25427:272 599.30609:203 617.23785:25 721.47211:36 723.47461:20 851.47125:10 851.51654:3…	TRUE	FALSE	FALSE	TRUE	FALSE	TRUE	111.312	77.8125	121.938	85.3125	45.25	102.375	48.8125	109.875	19705.1	23034.4	17592.6	20642.9	7522.31	9116.94	9611.88	12158	0.305115	0.0003824	0.0022007	0.0003806	0.0021825	0.0003689
Phospholipid	PI	40:5	18:0	22:5		PI 18:0-22:5	C49H85O13P	QLABQLNIHHHJCI-NIZIMQIGNA-N	CCCCCCCCCCCCCCCCCC(=O)OCC(COP(O)(=O)OC1C(O)C(O)C(O)C(O)C1O)OC(=O)CCCCC\C=C/C\C=C/C\C=C/C\C=C/C\C=C/CC	8.79592	911.56	[M-H]-	1728	78.96069:20 152.9946:61 222.99721:71 241.0126:307 259.01874:31 283.26669:488 285.25549:31 289.07401:5 297.04004:61 315.04263:36 329.24661:371 419.25128:204 437.26358:20 465.24036:46 581.28534:102 581.3092:211 599.2652:10 599.3205:76 625.32745:5 627.27667:36 645.29285:15 749.5014:20 908.66846:20 911.55878:3604	TRUE	FALSE	FALSE	FALSE	FALSE	TRUE	423.375	314.062	309.312	353.938	264.688	256.5	501.5	431.062	4268.81	5678.38	4229.06	4335.44	1739.38	1931.69	398.125	2212.31	0.848615	0.0011343	0.0559576	0.0009409	0.05612	0.0012316
Phospholipid	PI	40:6	18:0	22:6		PI 18:0-22:6	C49H83O13P	DJVOKHFQPGWUPK-HSBBONCLNA-N	CCCCCCCCCCCCCCCCCC(=O)OCC(COP(O)(=O)OC1C(O)C(O)C(O)C(O)C1O)OC(=O)CC\C=C/C\C=C/C\C=C/C\C=C/C\C=C/C\C=C/CC	8.67169	909.548	[M-H]-	7788	78.95197:20 78.95824:133 133.10657:10 152.99481:281 177.17009:31 223.00389:326 229.20331:102 241.01082:1311 249.18384:31 259.00555:31 259.01691:163 283.26245:2079 284.27026:32 297.04059:308 315.04822:163 327.23029:1319 419.24924:1027 420.26105:31 437.26447:122 463.21964:112 581.30701:1092 599.28723:146 599.31488:381 625.27942:207 643.29938:41 747.48798:51 747.51501:41 749.49536:41 817.49811:41 87…	TRUE	FALSE	FALSE	FALSE	TRUE	TRUE	1142.31	523.688	634.625	581.5	733.062	739.188	1183.5	960.875	5176.75	5580.94	4550.5	3901.56	21398.5	22429.9	27935.1	27133.6	0.342556	4.74e-05	0.0006506	5.23e-05	0.0006858	0.0008177
Phospholipid	PI	36:3	18:1	18:2		PI 18:1-18:2	C45H81O13P	MXJMOLQIXMJUEL-RQOIEFAZNA-N	CCCCCCCC\C=C/CCCCCCCC(=O)OCC(COP(O)(=O)OC1C(O)C(O)C(O)C(O)C1O)OC(=O)CCCCCCC\C=C/C\C=C/CCCCC	8.40056	859.53	[M-H]-	2846	78.95921:31 152.99442:25 222.99921:71 241.01253:173 253.21092:5 255.22668:46 259.01642:36 279.2345:235 281.2446:245 297.03519:46 305.25488:41 312.30875:5 391.22925:25 415.228:25 417.23734:82 435.24802:15 577.27856:46 579.29065:102 597.302:20 859.44635:25 859.53735:1413	FALSE	TRUE	FALSE	FALSE	FALSE	TRUE	3123.5	2362.56	3919.81	2694.75	2063.75	3477.38	3284.69	3632.38	2793.12	2760.25	1971.06	2122.56	2342.81	2728.19	3256.69	2997	0.86149	0.174406	0.635768	0.142178	0.51261	0.196926
Phospholipid	PI	38:5	18:1	20:4		PI 18:1-20:4	C47H81O13P	XGZVRASBCZTHNO-HAGCXRLMNA-N	CCCCCCCC\C=C/CCCCCCCC(=O)OCC(COP(O)(=O)OC1C(O)C(O)C(O)C(O)C1O)OC(=O)CCCCCC\C=C/C\C=C/C\C=C/C\C=C/CC	8.35067	883.534	[M-H]-	8767	78.9585:14 95.8694:2 96.96809:6 122.78246:2 152.99637:22 171.0096:4 205.19186:4 223.00108:35 241.00998:137 255.23073:31 257.23636:2 259.02274:18 259.24078:12 279.23856:2 281.24631:198 282.24814:4 283.26361:6 294.30493:2 297.03928:31 303.23099:192 313.00894:2 315.04926:12 329.24051:22 391.22769:10 409.22458:4 415.92233:4 417.23843:90 435.24609:14 439.1907:4 439.22617:18 553.24396:8 553.27386:12 57…	FALSE	TRUE	TRUE	FALSE	FALSE	TRUE	5736.56	4350.56	3706.06	2683.31	1966.75	4647.12	3707.81	5965	16993.4	22157.9	14327.5	20391.6	7145.5	8761.12	9037.94	8694.88	0.965615	0.0002492	0.0014087	0.0003071	0.0036951	0.0083038
Phospholipid	PS	38:6	16:0	22:6		PS 16:0-22:6	C44H74NO10P	PWBBJQOVCTWPIM-LGFBOSHVNA-N	CCCCCCCCCCCCCCCC(=O)OCC(COP(O)(=O)OCC(N)C(O)=O)OC(=O)CC\C=C/C\C=C/C\C=C/C\C=C/C\C=C/C\C=C/CC	8.30625	806.501	[M-H]-	521	78.95667:20 136.96249:10 152.9874:31 187.10126:10 205.13332:10 255.23114:275 281.23508:31 283.25949:71 284.26965:20 311.22742:10 327.23474:51 327.24753:10 343.22772:51 345.2435:10 391.21799:112 409.21765:31 409.23761:61 420.24298:20 460.31418:10 463.20978:31 711.71716:10 719.4397:41 719.45483:173 748.47882:20 806.45239:72 806.50049:165	TRUE	FALSE	FALSE	FALSE	TRUE	TRUE	468.25	239.188	288.688	170.25	224.625	350.312	316.312	432.812	650.125	610.688	524.188	618.938	695.875	1044.06	865.875	833.812	0.626508	0.0042246	0.0010259	0.0018096	0.0007277	0.0147905
Phospholipid	PS	40:6	18:0	22:6		PS 18:0-22:6	C46H78NO10P	LYYHRRPTEXPVOR-HSBBONCLNA-N	CCCCCCCCCCCCCCCCCC(=O)OCC(COP(O)(=O)OCC(N)C(O)=O)OC(=O)CC\C=C/C\C=C/C\C=C/C\C=C/C\C=C/C\C=C/CC	8.7319	834.524	[M-H]-	916	78.9618:31 152.98927:61 239.00375:21 276.23883:10 283.2644:505 327.22983:82 419.25449:245 437.26691:112 463.22516:41 747.49493:315 748.49829:10 788.52997:10 834.51697:313	TRUE	FALSE	FALSE	FALSE	TRUE	TRUE	550.438	394.375	666.188	434.188	293.188	506.5	773.5	374.562	1070.88	857	1024.81	1104.31	1489.56	1370.75	1599.81	2150.38	0.848	0.0008762	0.0007858	0.0043491	0.0011797	0.0123876
Sphingomyelin	SM	d30:1	d18:1	12:0		SM d18:1/12:0	C35H71N2O6P	HZCLJRFPXMKWHR-BYCLXTJYNA-N	CCCCCCCCCCCCC\C=C\C(O)C(COP([O-])(=O)OCC[N+](C)(C)C)NC(=O)CCCCCCCCCCC	8.01576	705.51	[M+Hac-H]-	2000	77.29275:2 78.95892:194 96.97124:6 116.9226:4 122.98454:18 152.99658:2 168.04097:474 193.07933:2 347.629:4 429.72849:2 431.30646:4 449.30679:20 542.40027:8 560.39392:16 585.2677:2 586.39813:6 627.5188:10 629.4856:10 631.4093:16 631.47668:2812 632.46985:8 645.52039:20 646.44562:24 705.51276:27	TRUE	FALSE	FALSE	FALSE	FALSE	FALSE	2260.69	2399.75	2186.38	1968.62	1690.81	2193.62	1874.62	1840.31	2070.75	2281.25	1969.19	2311.88	1718.5	1706.5	1656.75	1863.31	0.0711552	0.722027	0.0034734	0.102585	0.203688	0.0041286
Sphingomyelin	SM	d34:1	d18:1	16:0		SM d18:1/16:0	C39H79N2O6P	RWKUXQNLWDTSLO-NHQGMKOONA-N	CCCCCCCCCCCCCCCC(=O)NC(COP([O-])(=O)OCC[N+](C)(C)C)C(O)\C=C\CCCCCCCCCCCCC	9.01755	761.576	[M+Hac-H]-	3167	78.95716:133 168.02452:20 168.04465:345 223.08572:10 255.22894:41 446.3949:10 449.32419:31 685.35077:20 687.53931:2997 702.51147:41 761.56946:61	TRUE	FALSE	FALSE	FALSE	FALSE	FALSE	2679.75	4119.88	3564.31	3236.44	2236.75	3115.06	3709.69	3644.19	2928.5	2736.81	2930.19	3353.81	2578	3098.56	3271.69	3464.12	0.640235	0.255564	0.436708	0.622423	0.857028	0.63359
Sphingomyelin	SM	d40:1	d18:1	22:0		SM d18:1/22:0	C45H91N2O6P	FJJANLYCZUNFSE-BSKJHSHCNA-N	CCCCCCCCCCCCCCCCCCCCCC(=O)NC(COP([O-])(=O)OCC[N+](C)(C)C)C(O)\C=C\CCCCCCCCCCCCC	12.2158	845.672	[M+Hac-H]-	3810	78.95728:146 113.01614:3 122.98432:17 168.02634:10 168.0428:374 449.31461:24 682.52301:7 700.54822:31 726.56146:17 769.16827:14 769.19177:37 771.54541:14 771.62775:7404 772.61188:24 786.54218:10 786.56592:31 786.59363:37 845.66101:204	TRUE	FALSE	FALSE	FALSE	FALSE	FALSE	3312.62	1536.88	2301.38	1786.12	3480.94	4857	4692	4593.69	3652.62	3755.62	4371.38	5984.44	3458.19	4295.75	3894.19	4988	0.0049759	0.0161988	0.009248	0.956874	0.604042	0.669597
Sphingomyelin	SM	d41:1	d18:1	23:0		SM d18:1/23:0	C46H93N2O6P	SXZWBNWTCVLZJN-NHFVQZBWNA-N	CCCCCCCCCCCCCCCCCCCCCCC(=O)NC(COP([O-])(=O)OCC[N+](C)(C)C)C(O)\C=C\CCCCCCCCCCCCC	12.8738	859.689	[M+Hac-H]-	1752	78.95686:59 122.98711:12 141.02145:4 168.04074:153 349.92838:2 433.03079:4 449.28259:4 449.31549:12 469.21414:4 714.57227:12 717.56268:6 740.58893:6 765.3327:2 783.16498:18 785.48059:6 785.57153:27 785.65063:2872 786.65155:14 786.70697:4 800.6076:24 859.61853:12 859.69299:102	TRUE	FALSE	FALSE	FALSE	FALSE	FALSE	1495.94	829.438	1255.38	692.062	1420.31	1878.94	2055.31	2264.75	1623.75	2376.31	1907.56	1916.19	1902.75	2010.5	2074.75	2335	0.0178662	0.0106276	0.0027816	0.836897	0.416957	0.515845
Sphingomyelin	SM	d42:1	d18:1	24:0		SM d18:1/24:0	C47H95N2O6P	QEDPUVGSSDPBMD-OGSMZCTINA-N	CCCCCCCCCCCCCCCCCCCCCCCC(=O)NC(COP([O-])(=O)OCC[N+](C)(C)C)C(O)\C=C\CCCCCCCCCCCCC	13.0705	873.702	[M+Hac-H]-	15024	78.95927:620 93.59886:5 96.96626:15 119.65192:5 122.98234:102 168.04436:1842 367.35757:20 449.31281:102 516.36652:15 710.55792:36 710.60303:25 728.5968:97 754.55902:10 754.61328:46 797.15076:92 797.74445:10 799.45905:15 799.6665:33851 800.05359:65 800.66833:112 800.836:10 800.95178:10 801.67078:15 808.36847:10 814.61469:256 831.29529:5 873.70093:1137	TRUE	FALSE	FALSE	FALSE	FALSE	FALSE	12264.2	11109.1	15509	11770.6	11636	16672.6	13668.5	18120.9	9927.38	19151.1	15934.5	18967	13887.5	15305.2	16318.9	20137.9	0.227834	0.20845	0.0643504	0.721981	0.509901	0.87462
Sphingomyelin	SM	d42:2	d18:1	24:1		SM d18:1/24:1	C47H93N2O6P	SUTDVWUQTJGTCQ-IMMYYDDQNA-N	CCCCCCCCCCCCC\C=C\C(O)C(COP([O-])(=O)OCC[N+](C)(C)C)NC(=O)CCCCCCCCC\C=C/CCCCCCCCCCCC	12.222	871.69	[M+Hac-H]-	1904	78.95825:41 119.02937:2 122.98722:12 141.02155:2 168.04263:135 443.58502:4 449.31516:12 460.70999:4 703.61523:2 726.55524:6 749.84009:2 752.58197:6 795.11053:12 795.13837:12 797.56329:16 797.65094:2376 797.81433:12 798.65948:14 812.57233:10 812.61652:27 812.64874:6 868.85504:2 871.60638:6 871.67719:92	FALSE	TRUE	FALSE	FALSE	FALSE	FALSE	2328	1845.06	1602.5	1221.38	1362.56	1477.44	1709.88	2175.06	2169.06	2440.19	2022.94	1651.25	1748.94	2141.81	2323.75	2241.81	0.824346	0.300846	0.216789	0.160862	0.0969942	0.842216
Glycerolipid	TAG	46:1	14:0	16:0	16:1	TAG 14:0-16:0-16:1	C49H92O6	OZXXJVVHOJHMRX-PNHLSOANNA-N	CCCCCCCCCCCCCCCC(=O)OC(COC(=O)CCCCCCCCCCCCC)COC(=O)CCCCC\C=C/CCCCCCCC	14.1081	794.723	[M+NH4]+	506	85.09956:20 107.08426:20 127.14556:10 190.37486:10 237.21397:10 495.44894:71 521.43866:163 523.47681:102 546.94385:10 549.4743:153 577.49786:31 794.75153:20	TRUE	TRUE	FALSE	FALSE	FALSE	FALSE	1185.88	187.938	378.938	580.625	358	308.188	61.4375	978.062	277.062	367.438	630	926.25	628.812	518.375	455.688	251.75	0.609331	0.903034	0.621869	0.629509	0.86538	0.621032
Glycerolipid	TAG	48:1	14:0	16:0	18:1	TAG 14:0-16:0-18:1	C51H96O6	UPTISBGEYYYCRS-QOCHGBHMNA-N	CCCCCCCCCCCCCCCC(=O)OC(COC(=O)CCCCCCCCCCCCC)COC(=O)CCCCCCCCC\C=C/CCCCCC	14.4227	822.749	[M+NH4]+	4384	73.06264:10 81.06858:82 85.10001:31 95.08369:41 97.10153:31 107.08327:10 119.08332:10 123.11063:31 123.13098:10 135.11343:31 219.21613:20 228.98827:10 237.22313:41 239.22874:61 257.92642:10 265.24207:31 521.45819:10 523.47375:390 524.48462:10 548.06317:10 549.48108:1063 550.47699:31 551.49371:345 576.88104:21 577.51154:346 805.71106:10 822.74042:71	TRUE	TRUE	FALSE	FALSE	FALSE	FALSE	9876.06	3799.75	4584.06	7916.81	3311.75	3870.06	1677.5	6950.88	1681.5	2441.19	4375.62	3773.69	3338.88	4776.75	2920.38	4853.5	0.200305	0.0662882	0.139006	0.509558	0.987438	0.294888
Glycerolipid	TAG	48:2	14:0	16:0	18:2	TAG 14:0-16:0-18:2	C51H94O6	HUAFGDPJQVZKDZ-TXMPEXPYNA-N	CCCCCCCCCCCCCCCC(=O)OC(COC(=O)CCCCCCCCCCCCC)COC(=O)CCCCCCCC\C=C/C=C\CCCCC	14.1628	820.737	[M+NH4]+	4778	71.08745:20 79.05375:10 81.06726:31 93.06931:10 95.07816:31 104.99261:20 113.13642:10 127.11265:10 184.97525:10 211.20659:41 219.21423:20 235.21538:10 237.21468:41 239.23772:61 263.24475:31 265.26074:10 285.24771:31 302.93259:10 313.25919:20 491.42587:10 519.46667:10 521.45911:92 521.4881:41 523.46826:241 526.94415:10 547.46979:406 549.45892:41 549.47211:337 561.51624:10 573.68085:10 575.50372:26…	TRUE	FALSE	FALSE	FALSE	FALSE	TRUE	11526.7	3430.81	5054.31	8087.31	3437.31	3035.88	1689.69	7700.44	1655.5	4012	4320.81	5966.19	4376.25	3527	3621.62	5010.19	0.215114	0.178474	0.203565	0.988915	0.904759	0.88407
Glycerolipid	TAG	48:3	14:0	16:1	18:2	TAG 14:0-16:1-18:2	C51H92O6	GNSSLMOBGUWUHC-BBYZJILNNA-N	CCCCCCCCCCCCCC(=O)OCC(COC(=O)CCCCCCCC\C=C/C=C\CCCCC)OC(=O)CCCCC\C=C/CCCCCCCC	13.932	818.722	[M+NH4]+	1314	79.06087:10 95.08321:20 107.08278:20 133.10489:10 211.20589:31 237.21393:20 237.22044:61 237.24434:10 245.2272:31 263.23019:71 515.03094:10 519.42365:41 519.44293:82 521.45465:300 545.4632:71 546.03674:21 547.4718:583 548.48242:42 560.19849:10 573.4903:278 575.49567:71 601.51337:82 801.69922:41 818.72681:51	TRUE	TRUE	FALSE	FALSE	FALSE	TRUE	3329.5	928.25	1353.69	2249.56	951.688	839.75	673.375	2161.12	346.188	917.625	1000.5	1570.38	1043.5	1048.06	1324.38	1283.5	0.24717	0.137575	0.234009	0.655847	0.960923	0.439936
Glycerolipid	TAG	50:5	14:0	18:2	18:3	TAG 14:0-18:2-18:3	C53H92O6	GLRVHWCFJRDQSX-DTIWWKLMNA-N	CCCCCCCCCCCCCC(=O)OCC(COC(=O)CCCCCCCCC\C=C/C=C\C=C/CC)OC(=O)CCCCCCCC\C=C/C=C\CCCCC	13.8995	842.722	[M+NH4]+	829	81.06963:20 93.06913:10 99.07996:10 107.08745:20 121.10085:20 137.13635:20 187.00119:20 203.18282:10 211.19821:20 220.97231:10 259.21292:10 261.21576:51 266.87848:10 268.99625:61 302.99384:10 311.25705:20 337.27829:20 424.96729:10 497.44308:20 515.01935:31 543.49249:10 545.45789:112 547.4599:143 569.45441:20 571.47632:82 573.48486:31 575.50714:31 597.47302:51 599.50256:20 807.68048:20 825.68311:2…	TRUE	FALSE	FALSE	FALSE	FALSE	TRUE	1153.25	295.062	532.062	1049.75	1012.62	1151.25	690.438	2513.31	186.188	628.812	675.5	1104	519.562	528.938	492.625	726.5	0.243301	0.709018	0.404036	0.169295	0.148975	0.689976
Glycerolipid	TAG	52:7	14:0	18:2	20:5	TAG 14:0-18:2-20:5	C55H92O6	WXFNJBNSRDNXCG-QUWPIPCFNA-N	CCCCCCCCCCCCCC(=O)OCC(COC(=O)CCC\C=C/C\C=C/C\C=C/C\C=C/C\C=C/CC)OC(=O)CCCCCCCC\C=C/C=C\CCCCC	13.7714	866.714	[M+NH4]+	770	80.04878:10 81.07198:61 91.0573:31 91.06672:10 95.08878:41 105.07174:20 109.09534:20 123.11648:31 131.08452:31 133.1001:31 143.09628:10 159.11418:31 161.13161:31 171.11208:20 173.12411:20 185.13599:41 187.15138:31 199.1463:31 201.16432:122 211.14661:31 211.20197:71 263.24188:41 267.20084:41 267.21005:61 268.99814:41 285.21378:61 285.24237:82 311.24911:31 337.27518:82 529.44025:10 539.43719:10 545…	TRUE	FALSE	FALSE	TRUE	FALSE	TRUE	371.875	89.1875	157.062	282.25	291.312	288.562	280.438	648.625	613	1697.12	1504.81	2566.19	793.75	734.562	888.375	1112.81	0.217253	0.0401071	0.0007476	0.0525012	0.0062735	0.17251
Glycerolipid	TAG	54:8	14:0	18:2	22:6	TAG 14:0-18:2-22:6	C57H94O6	DFWRACCMCQXJJJ-IGJMJUHRNA-N	CCCCCCCCCCCCCC(=O)OCC(COC(=O)CC\C=C/C\C=C/C\C=C/C\C=C/C\C=C/C\C=C/CC)OC(=O)CCCCCCCC\C=C/C=C\CCCCC	13.8449	892.737	[M+NH4]+	3910	79.05133:20 81.07117:112 83.08561:31 91.05372:31 93.07348:41 95.08512:82 105.06354:20 105.0751:20 107.08333:41 109.10172:61 115.05949:10 119.08493:31 121.09333:20 123.11383:31 131.08339:41 135.11351:20 145.10205:31 149.13721:31 159.11469:41 161.13568:41 163.14421:61 169.09947:20 173.13576:31 175.14467:31 183.11479:31 185.13072:31 187.14417:31 189.16463:20 197.13498:20 199.15077:31 201.15881:61 21…	TRUE	FALSE	FALSE	FALSE	TRUE	TRUE	836.75	386.188	484.75	1078.44	831.375	927	694	1888.44	3258.44	7112.88	5864	8311.44	5924.31	6408.19	7415	11138.8	0.264042	0.0140874	0.0087953	0.0155423	0.0091486	0.3605
Glycerolipid	TAG	55:8	15:0	18:2	22:6	TAG 15:0-18:2-22:6	C58H96O6	KUBSSQPHXNSEQE-DQNFAHGTNA-N	CCCCCCCCCCCCCCC(=O)OCC(COC(=O)CC\C=C/C\C=C/C\C=C/C\C=C/C\C=C/C\C=C/CC)OC(=O)CCCCCCCC\C=C/C=C\CCCCC	14.013	906.756	[M+NH4]+	659	79.05605:10 263.23727:61 293.23001:31 299.2572:20 311.23904:61 313.27597:31 325.21442:41 337.27505:51 549.4776:20 559.72449:10 561.49835:249 562.4884:41 573.4566:10 575.5025:92 595.62811:10 597.48895:122 609.46716:31 609.49854:61 619.47662:71 619.48712:51 621.48334:41 633.53516:10 643.45679:112 643.47467:71 645.49121:31 647.50012:71 824.70435:20 875.73212:20 884.68567:10 889.69495:31 899.6629:75 …	TRUE	FALSE	FALSE	FALSE	TRUE	TRUE	185.812	46.8125	18.6875	125.062	103.312	73	88.625	329.688	271.938	500.125	332.188	543.75	1894.81	1697.62	2073.81	2264.75	0.474672	0.0056192	5.9e-06	0.0254286	1.02e-05	2.74e-05
Glycerolipid	TAG	48:0	16:0	16:0	16:0	TAG 16:0-16:0-16:0	C51H98O6	PVNIQBQSYATKKL-UHFFFAOYSA-N	CCCCCCCCCCCCCCCC(=O)OCC(COC(=O)CCCCCCCCCCCCCCC)OC(=O)CCCCCCCCCCCCCCC	14.7423	824.767	[M+NH4]+	1511	83.09071:10 95.0851:51 108.00657:10 123.11543:20 239.24011:122 313.27448:41 523.46881:41 549.78699:31 551.50525:1329 552.48975:48 579.53577:31 824.7597:31	TRUE	FALSE	FALSE	FALSE	FALSE	FALSE	1550	1025.62	1641.94	1196.69	2076.31	1678.44	873.812	3239.88	1073.75	1023.69	1451.44	1703.69	1226.69	1333.56	1398.38	1686.69	0.277249	0.858561	0.753366	0.253842	0.343789	0.622093
Glycerolipid	TAG	50:0	16:0	16:0	18:0	TAG 16:0-16:0-18:0	C53H102O6	DQKMNCLZNGAXNX-UHFFFAOYNA-N	CCCCCCCCCCCCCCCCCC(=O)OCC(COC(=O)CCCCCCCCCCCCCCC)OC(=O)CCCCCCCCCCCCCCC	15.1304	852.8	[M+NH4]+	498	224.90758:10 326.94507:10 538.96625:10 549.7832:21 551.50153:310 553.50458:21 575.44977:10 579.17877:21 579.53534:388 852.79749:41	TRUE	FALSE	FALSE	FALSE	FALSE	FALSE	306.75	370.688	483.688	382.5	685.812	528.812	398	1050.56	319.812	344	506.875	591.25	488.312	611	506.5	400.25	0.103259	0.492901	0.0873522	0.197369	0.308241	0.464986
Glycerolipid	TAG	50:1	16:0	16:0	18:1	TAG 16:0-16:0-18:1	C53H100O6	ZKEWGTVAIGJNBK-QOCHGBHMNA-N	CCCCCCCCCCCCCCCC(=O)OCC(COC(=O)CCCCCCCCC\C=C/CCCCCC)OC(=O)CCCCCCCCCCCCCCC	14.7727	850.784	[M+NH4]+	17995	71.08772:71 77.03979:10 81.0675:92 82.07034:10 83.08447:71 93.07225:31 95.08525:133 97.10033:51 107.09074:10 109.0974:71 111.11972:51 114.79792:10 121.10274:51 123.10922:31 123.11861:71 123.12801:10 129.12495:10 135.1185:41 137.13333:31 163.15683:10 177.13135:20 215.20509:10 237.23618:10 239.23965:359 247.24017:61 265.2489:184 313.27362:122 327.05417:10 503.48599:31 549.49365:82 551.50635:2827 55…	TRUE	TRUE	FALSE	FALSE	FALSE	FALSE	30335.8	19274	19327.8	29248.1	13316.6	14992.4	8749	30637.1	6257.06	15410.5	13207.5	18342.1	16917.2	20158.4	16020.2	15719.2	0.225554	0.0301862	0.0617068	0.5283	0.957443	0.20848
Glycerolipid	TAG	50:2	16:0	16:1	18:1	TAG 16:0-16:1-18:1	C53H98O6	URPCLMPOIWCNBL-QSZZZDORNA-N	CCCCCCCCCCCCCCCC(=O)OCC(COC(=O)CCCCCCCCC\C=C/CCCCCC)OC(=O)CCCCC\C=C/CCCCCCCC	14.4769	848.768	[M+NH4]+	41853	71.08514:224 74.30766:10 79.0538:102 81.06985:471 83.08428:295 85.06487:41 85.0987:175 91.04963:20 93.0707:133 95.08507:744 97.10014:291 99.11668:61 107.07889:20 107.08472:82 109.10165:373 111.11806:153 113.0929:41 121.10102:273 123.11689:239 125.13046:61 135.09866:21 135.11343:249 137.13484:153 139.11469:41 149.13194:122 151.14943:102 153.12984:51 161.13199:51 161.32188:10 163.1441:122 165.15962…	TRUE	TRUE	FALSE	FALSE	FALSE	FALSE	96227.6	37739.3	49210.8	71764.4	33630.1	31265.9	17865.8	61768.1	13266	33528.4	36896.4	43453	31088.4	41951.1	35399.4	34594.3	0.132924	0.0694465	0.117673	0.713478	0.9708	0.585291
Glycerolipid	TAG	50:3	16:0	16:1	18:2	TAG 16:0-16:1-18:2	C53H96O6	DQDPOOOZAMWWOY-WTGFFXNQNA-N	CCCCCCCCCCCCCCCC(=O)OCC(COC(=O)CCCCCCCC\C=C/C=C\CCCCC)OC(=O)CCCCC\C=C/CCCCCCCC	14.2056	846.752	[M+NH4]+	29313	79.05134:20 81.06863:71 83.0869:41 93.07076:31 95.08237:61 109.09878:51 121.09645:31 123.11855:41 133.112:10 137.12999:51 149.14069:31 163.14784:41 209.15704:10 219.21214:41 233.23315:10 237.21466:71 239.23769:82 245.22574:82 263.23096:92 265.2515:31 308.90927:10 313.26657:41 319.26074:41 337.26013:20 337.27826:31 545.50366:21 547.47272:280 547.78638:21 549.49158:1089 550.48096:31 551.52417:10 57…	TRUE	TRUE	FALSE	FALSE	FALSE	TRUE	81365.6	23327.3	29794.3	57596.6	22262.4	21069.6	11855.6	41846.9	10820.8	22591.4	26627.9	34562.1	20021.8	24607.4	17119.9	23534.9	0.159118	0.138244	0.139059	0.941996	0.668806	0.671843
Glycerolipid	TAG	52:6	16:0	16:1	20:5	TAG 16:0-16:1-20:5	C55H94O6	HCHDAEYWBMKKJY-GHQZPNBONA-N	CCCCCCCCCCCCCCCC(=O)OCC(COC(=O)CCC\C=C/C\C=C/C\C=C/C\C=C/C\C=C/CC)OC(=O)CCCCC\C=C/CCCCCCCC	14.0233	868.736	[M+NH4]+	2279	79.06122:10 83.08416:31 95.08356:20 105.07635:10 109.10592:10 125.09399:10 165.16484:10 171.11961:10 173.13911:10 189.172:10 201.16641:41 225.15897:10 235.17157:10 237.21631:31 254.98659:10 259.20566:20 263.23724:20 265.25549:10 267.21228:31 285.22556:41 301.29611:10 311.2514:20 313.26337:31 320.99173:10 337.26712:20 547.62:21 549.487:227 569.45599:20 571.48126:51 573.47968:20 575.52228:51 587.48…	TRUE	TRUE	FALSE	TRUE	FALSE	TRUE	260.75	70.75	130.938	201.312	166.75	167.25	2530.38	550.062	2358.94	6282.38	5314.56	8549	2409.38	2865.19	1981.69	2628.56	0.311641	0.0237057	0.0007936	0.0144283	0.0350253	0.0895105
Glycerolipid	TAG	51:2	16:0	17:1	18:1	TAG 16:0-17:1-18:1	C54H100O6	WHWWSPAFLPLISL-LIZOOBNRNA-N	CCCCCCCCCCCCCCCC(=O)OCC(COC(=O)CCCCCCCCC\C=C/CCCCCC)OC(=O)CCCCC\C=C/CCCCCCCCC	14.6195	862.782	[M+NH4]+	2020	81.06868:31 91.05107:10 109.10323:20 113.12902:10 226.99225:31 237.21672:31 237.23193:10 239.2354:41 247.24252:20 255.23943:10 265.23987:20 547.77594:10 549.47784:31 561.49524:21 563.49963:546 564.53168:20 565.521:61 573.01093:10 575.48242:51 575.49939:71 576.51184:21 577.50482:227 589.50806:239 590.5191:20 591.53436:51 591.55835:41 597.30988:10 603.52234:122 761.74615:20 862.7829:82	TRUE	TRUE	FALSE	FALSE	FALSE	FALSE	3980.56	2086.38	2621.12	4456.31	1373	1458.25	1048.5	2965.62	1001.81	1727.56	1215.25	1216.44	1900.5	2321.12	1793.44	1147.06	0.0662366	0.0136528	0.0492234	0.389751	0.87729	0.132713
Glycerolipid	TAG	51:3	16:0	17:1	18:2	TAG 16:0-17:1-18:2	C54H98O6	LZGIWQXZVKXCKP-KBWLTDIENA-N	CCCCCCCCCCCCCCCC(=O)OCC(COC(=O)CCCCCCCC\C=C/C=C\CCCCC)OC(=O)CCCCC\C=C/CCCCCCCCC	14.3572	860.769	[M+NH4]+	2746	81.06716:15 81.07606:5 95.08356:15 109.09858:15 123.11366:10 225.22496:15 233.22009:5 239.25502:5 251.22955:20 263.23544:31 299.26016:20 311.25204:5 367.13388:5 368.95007:20 561.48602:148 563.50043:286 564.50897:10 567.00909:5 573.47791:20 573.5083:20 575.50354:174 577.50226:25 587.49982:190 589.51575:36 599.60944:5 601.51459:133 614.94904:10 843.72382:20 860.75085:46 860.79639:36	TRUE	TRUE	FALSE	FALSE	FALSE	TRUE	5444.25	1680.19	2961.56	5075.62	2534.25	2293.88	1731.69	3910.88	1181.25	2723.75	2433.75	1599.12	2204.56	2913.88	2599.06	2646.06	0.28709	0.109102	0.271784	0.320888	0.95778	0.168312
Glycerolipid	TAG	52:1	16:0	18:0	18:1	TAG 16:0-18:0-18:1	C55H104O6	RBJMAKBTUZSIDN-QOCHGBHMNA-N	CCCCCCCCCCCCCCCCCC(=O)OC(COC(=O)CCCCCCCCCCCCCCC)COC(=O)CCCCCCCCC\C=C/CCCCCC	15.1679	878.821	[M+NH4]+	2878	81.0697:20 83.08541:20 89.05725:10 97.1:31 239.23528:31 265.24896:41 267.2634:31 520.92712:10 549.48151:31 551.50415:61 576.69519:21 577.52557:529 578.5127:31 579.53461:552 580.5506:51 596.9035:10 605.55914:535 606.54205:31 607.58844:31 878.83386:71	TRUE	TRUE	FALSE	FALSE	FALSE	FALSE	3518.69	2269.69	2943.69	4123.56	2510.94	2891	2304.69	4975	1196.88	2607.44	2532.5	2693.94	2684.56	3404.88	2571.38	2812.19	0.954451	0.122487	0.45966	0.245415	0.654065	0.178384
Glycerolipid	TAG	52:2	16:0	18:1	18:1	TAG 16:0-18:1-18:1	C55H102O6	NJWLXJXDVKOEOP-IKJQKJQYNA-N	CCCCCCCCCCCCCCCC(=O)OCC(COC(=O)CCCCCCCCC\C=C/CCCCCC)OC(=O)CCCCCCCCC\C=C/CCCCCC	14.8015	876.798	[M+NH4]+	77812	71.08371:173 77.03812:51 79.05231:82 81.06834:635 83.08533:417 85.06463:71 85.10236:143 91.05343:41 93.06774:112 95.07658:32 95.08483:708 97.0999:430 99.07712:41 99.11504:71 105.54246:10 107.08595:92 109.09994:463 111.11931:207 121.10233:337 123.11352:330 125.13179:112 135.11812:345 137.12305:11 137.1313:133 139.10945:51 149.13171:173 151.14746:112 153.12611:71 163.14748:153 165.16121:122 167.138…	TRUE	TRUE	FALSE	FALSE	FALSE	FALSE	184929	77871.6	102798	192037	44505.7	50328.4	34029.4	101615	31686.1	71512.8	54547.9	53924.6	59307.9	73356.2	56779.3	55760.6	0.0455645	0.0277966	0.0717473	0.792814	0.821215	0.394013
Glycerolipid	TAG	52:3	16:0	18:1	18:2	TAG 16:0-18:1-18:2	C55H100O6	PFTMZNUFSPJEJR-KDHVXLOFNA-N	CCCCCCCCCCCCCCCC(=O)OCC(COC(=O)CCCCCCCC\C=C/C=C\CCCCC)OC(=O)CCCCCCCCC\C=C/CCCCCC	14.5236	874.783	[M+NH4]+	151489	71.08519:284 77.03719:61 79.05262:271 79.50361:23 81.06866:1264 83.04965:84 83.08566:852 85.1027:331 91.05243:102 93.06946:361 95.08519:1598 97.06135:61 97.10166:503 99.0803:92 103.0559:10 105.07086:112 107.07466:32 107.08634:331 109.10034:1108 111.08105:112 111.11674:309 113.09308:71 115.10803:31 117.33021:10 119.08352:153 121.10123:519 123.11553:677 125.13225:153 125.81023:10 127.11125:61 133.0…	TRUE	TRUE	FALSE	FALSE	FALSE	TRUE	264192	128991	177148	269786	117745	110351	104614	233405	69394.2	137240	123110	136326	131369	160429	124895	134830	0.187793	0.0486425	0.124388	0.497845	0.914924	0.276013
Glycerolipid	TAG	53:2	16:0	18:1	19:1	TAG 16:0-18:1-19:1	C56H104O6	FWQDNGXDYNUUBU-BZHHNKPINA-N	CCCCCCCCCCCCCCCC(=O)OCC(COC(=O)CCCCCCC\C=C/CCCCCCCCC)OC(=O)CCCCCCCCC\C=C/CCCCCC	14.9993	890.821	[M+NH4]+	696	81.07085:10 91.05069:10 165.16293:10 186.99318:20 226.98116:10 265.25549:31 268.99805:71 424.97507:10 561.55176:10 563.5462:10 577.51465:92 589.52484:20 591.534:238 603.52203:82 605.54443:31 617.54315:163 620.97687:10 631.55151:31 873.80408:20 890.76825:82 890.80194:41	TRUE	TRUE	FALSE	FALSE	FALSE	FALSE	1279.38	534.688	1208.94	1803	387.188	500.875	474.5	1014.06	186.188	463.438	331.062	423	597.25	755.188	636.125	538.312	0.0844064	0.0425536	0.112595	0.167179	0.809707	0.010557
Glycerolipid	TAG	54:1	16:0	18:1	20:0	TAG 16:0-18:1-20:0	C57H108O6	QKCZWZMHMPYOPG-ATJXCDBQNA-N	CCCCCCCCCCCCCCCCCCCC(=O)OCC(COC(=O)CCCCCCCCCCCCCCC)OC(=O)CCCCCCCCC\C=C/CCCCCC	15.6163	906.849	[M+NH4]+	797	71.08534:8 81.07137:8 83.0871:10 85.10155:8 95.08122:10 95.08535:12 97.09627:6 97.106:2 104.9915:2 109.10051:10 111.11394:4 113.14277:2 123.11101:4 135.12532:2 163.14822:2 173.13618:2 179.18449:4 217.51971:2 225.15152:2 226.9865:6 233.18198:2 239.23389:14 246.94824:4 247.24321:10 254.97649:4 265.25211:14 267.26425:6 268.99698:6 292.96558:4 295.3006:6 298.98517:2 311.28766:2 313.26981:8 321.31433:…	TRUE	TRUE	FALSE	FALSE	FALSE	FALSE	1074.81	578.688	912.562	881.75	512.625	1156.19	674.625	1462.12	285.5	539.688	577.125	1054	607.5	906.375	648.688	877.062	0.723951	0.241602	0.458583	0.259416	0.43966	0.443363
Glycerolipid	TAG	54:2	16:0	18:1	20:1	TAG 16:0-18:1-20:1	C57H106O6	FVKDUIOZGUGCON-NJDMNPJTNA-N	CCCCCCCCCCCCCCCC(=O)OCC(COC(=O)CCCCCCCCC\C=C/CCCCCCCC)OC(=O)CCCCCCCCC\C=C/CCCCCC	15.1992	904.832	[M+NH4]+	4366	79.05349:20 81.06445:41 83.08396:31 85.09838:20 93.08126:10 95.08198:51 97.09981:71 109.09541:31 111.11473:31 119.08142:10 121.10842:10 135.11797:20 238.50218:20 239.23923:71 247.2442:51 256.28583:10 265.25311:173 267.26987:31 293.28302:102 313.27832:31 339.27298:20 339.28339:41 356.9108:20 547.49475:10 549.48065:61 572.95978:10 575.48193:51 575.51239:52 577.51111:1224 578.51855:82 579.53363:41 5…	TRUE	TRUE	FALSE	FALSE	FALSE	FALSE	7583.75	3964.12	5907.5	7431.75	2943.69	3965.44	2891.56	6269.44	2393.88	3746.88	3200.94	3929.12	3416.5	4682.06	3625.62	3897	0.104945	0.0188158	0.039991	0.447953	0.897766	0.232143
Glycerolipid	TAG	54:5	16:0	18:1	20:4	TAG 16:0-18:1-20:4	C57H100O6	WKSLEDJKCJNITP-DEOATQBANA-N	CCCCCCCCCCCCCCCC(=O)OCC(COC(=O)CCC\C=C/C\C=C/C\C=C/C\C=C/CCCCC)OC(=O)CCCCCCCCC\C=C/CCCCCC	14.4695	898.785	[M+NH4]+	12088	71.08263:92 77.04567:10 79.05242:71 81.06973:184 83.08545:122 85.09988:112 91.05357:143 93.06651:82 95.08634:271 97.09727:102 105.06773:102 107.08318:51 109.06326:31 109.10157:195 111.1165:51 117.0703:143 119.08326:184 121.10252:133 123.1184:102 129.06544:51 131.08488:143 133.09885:204 135.07568:31 135.11832:133 137.13316:61 143.07809:20 145.09685:61 147.11774:92 149.09921:41 149.13367:82 151.145…	TRUE	TRUE	TRUE	FALSE	FALSE	TRUE	2461.44	7032.19	2672.75	3843.38	31988.9	33669.1	29412.5	72728.1	2499	1647.94	891.438	1358.25	1168.44	772.562	500.875	765.188	0.0338953	0.0730596	0.0548464	0.0294758	0.0280661	0.0715672
Glycerolipid	TAG	54:6	16:0	18:1	20:5	TAG 16:0-18:1-20:5	C57H98O6	BICSRRMOKQNZTH-WDHDEQFZNA-N	CCCCCCCCCCCCCCCC(=O)OCC(COC(=O)CCC\C=C/C\C=C/C\C=C/C\C=C/C\C=C/CC)OC(=O)CCCCCCCCC\C=C/CCCCCC	14.3193	896.764	[M+NH4]+	26593	77.03844:20 81.06358:31 81.06739:92 83.08437:51 85.09879:31 91.04973:20 91.05376:82 93.07081:51 95.08517:133 97.10165:71 105.06649:41 109.09736:51 117.0705:82 121.10273:71 123.11549:61 129.06886:61 131.08672:61 133.09418:31 133.10719:61 135.11197:61 143.08507:31 145.09875:51 149.12871:31 157.09772:31 159.10768:31 159.11836:82 161.13223:61 163.14435:61 169.09593:20 169.1051:61 171.1201:71 173.1284…	TRUE	TRUE	FALSE	TRUE	FALSE	TRUE	11844.4	8081.62	8616.75	11469.3	53100.3	802.688	46582	103423	15955.4	37872.6	27189.5	42729.4	12219.9	16637.2	12865.4	16093.1	0.146015	0.0372651	0.023497	0.393975	0.180311	0.0673329
Glycerolipid	TAG	54:6	16:0	18:1	20:5	TAG 16:0-18:1-20:5	C57H98O6	BICSRRMOKQNZTH-WDHDEQFZNA-N	CCCCCCCCCCCCCCCC(=O)OCC(COC(=O)CCC\C=C/C\C=C/C\C=C/C\C=C/C\C=C/CC)OC(=O)CCCCCCCCC\C=C/CCCCCC	14.2424	896.77	[M+NH4]+	31919	77.04217:31 79.05389:61 81.06867:92 83.08566:61 85.10139:41 91.05241:102 95.08378:112 97.10023:112 102.67091:10 105.07079:41 105.49495:10 107.08918:51 109.09731:71 117.07043:61 121.09798:71 123.11539:51 129.06876:51 131.08499:51 131.08983:71 133.10219:82 135.11513:51 137.13324:51 141.12552:10 143.08659:51 145.09689:61 147.11266:41 157.10458:82 159.11282:102 161.12845:51 163.1153:41 163.15134:51 1…	TRUE	TRUE	FALSE	TRUE	FALSE	TRUE	10954.6	8542.81	8982.38	11478.1	58504.9	55671.4	47506.4	121973	15783.1	42937.7	30531.1	41534.9	11836.9	15740.4	13398.2	15331.1	0.0380559	0.0354767	0.0123445	0.0816749	0.0452303	0.0578777
Glycerolipid	TAG	56:2	16:0	18:1	22:1	TAG 16:0-18:1-22:1	C59H110O6	FHNDHUBWZSORDJ-IBEOKAAHNA-N	CCCCCCCCCCCCCCCC(=O)OCC(COC(=O)CCCCCCCCC\C=C/CCCCCCCCCC)OC(=O)CCCCCCCCC\C=C/CCCCCC	15.612	932.863	[M+NH4]+	594	89.66123:5 226.98763:15 239.2285:10 265.24646:20 321.31061:10 547.49548:5 559.5481:5 575.49286:15 577.50507:205 599.50177:15 601.67664:5 603.5296:61 605.55206:82 627.54132:5 631.56635:36 633.58905:302 634.59094:15 655.56769:15 657.53436:5 659.58728:206 661.59985:15 911.7865:138 912.8092:15 932.85901:66	TRUE	TRUE	FALSE	FALSE	FALSE	FALSE	1038.69	497	1069.94	923.562	374.25	535.562	321.375	924.375	343.625	393.812	482.125	782.438	353.875	500.375	444.5	521.25	0.120588	0.0596384	0.0208636	0.826874	0.574568	0.680258
Glycerolipid	TAG	56:6	16:0	18:1	22:5	TAG 16:0-18:1-22:5	C59H102O6	LXKOOMKDVRTCPD-BZAHDIOMNA-N	CCCCCCCCCCCCCCCC(=O)OCC(COC(=O)CCCCC\C=C/C\C=C/C\C=C/C\C=C/C\C=C/CC)OC(=O)CCCCCCCCC\C=C/CCCCCC	14.4763	924.8	[M+NH4]+	17244	71.08522:133 77.0397:31 79.05139:71 81.06742:196 83.08439:153 85.10142:112 87.07547:10 91.05379:112 93.06947:112 95.08382:295 97.09888:102 105.0723:71 107.08633:92 109.06791:21 109.10033:166 111.11673:61 116.06212:10 117.07205:51 119.08195:92 121.09965:184 123.11394:82 127.10963:31 129.0705:61 131.08513:92 133.09908:102 135.11526:153 137.12679:51 143.25389:10 145.09877:71 147.11284:31 149.13045:5…	TRUE	TRUE	FALSE	FALSE	FALSE	TRUE	8857.88	6003.81	7147.62	11809.8	15549.6	17090.6	15560.8	35641	10878.8	30649.3	19625.5	21516	20576.8	23207.3	3908.12	27884.4	0.048576	0.0282083	0.137441	0.964766	0.782703	0.797443
Glycerolipid	TAG	56:7	16:0	18:1	22:6	TAG 16:0-18:1-22:6	C59H100O6	DNTWVXNMAFTXDU-KSLGMIIPNA-N	CCCCCCCCCCCCCCCC(=O)OCC(COC(=O)CC\C=C/C\C=C/C\C=C/C\C=C/C\C=C/C\C=C/CC)OC(=O)CCCCCCCCC\C=C/CCCCCC	14.3862	922.782	[M+NH4]+	37689	71.08411:272 77.03606:71 79.05523:282 81.07003:737 83.08575:460 85.06374:51 85.10018:325 91.0552:392 93.06953:367 95.08525:1074 97.06279:71 97.10172:353 99.11687:82 105.06945:173 107.08637:286 109.10036:593 111.11676:217 113.13361:61 115.05204:31 117.06902:288 119.08352:265 121.10122:514 123.11552:359 125.09593:61 125.12907:102 127.11123:41 127.151:71 129.06729:153 130.08069:31 131.08675:372 133.…	TRUE	TRUE	FALSE	FALSE	TRUE	TRUE	14734.9	5771	8513.69	13960.5	10995.9	631.125	10571.6	1807.81	11899.2	5574.31	19727.4	25661.6	103915	129669	110886	128702	0.225837	0.349756	4.1e-06	0.111065	3.8e-06	1.2e-05
Glycerolipid	TAG	56:7	16:0	18:1	22:6	TAG 16:0-18:1-22:6	C59H100O6	DNTWVXNMAFTXDU-KSLGMIIPNA-N	CCCCCCCCCCCCCCCC(=O)OCC(COC(=O)CC\C=C/C\C=C/C\C=C/C\C=C/C\C=C/C\C=C/CC)OC(=O)CCCCCCCCC\C=C/CCCCCC	14.2578	922.785	[M+NH4]+	31035	71.08619:41 77.03823:10 79.05241:41 81.06845:71 83.08672:51 85.10248:41 91.05624:51 93.06922:82 95.0877:61 97.10142:31 105.0677:31 105.08072:10 109.09859:82 117.07484:41 119.08323:51 121.10249:71 123.11836:41 131.08807:41 135.11008:31 137.13643:31 143.08818:41 147.08005:41 149.1319:31 156.0946:10 159.11809:61 161.13016:51 163.14948:31 169.103:71 171.11244:61 173.1319:41 175.14265:41 179.18581:10 …	TRUE	TRUE	FALSE	FALSE	TRUE	TRUE	5843.81	5026.06	5862.69	7336.06	15190.1	17770.8	16373.1	39133.9	20519.8	47141.6	35010.5	42930.1	29981.3	32640.3	84745.3	91051.4	0.0658657	0.0136045	0.0467637	0.131116	0.0740921	0.230997
Glycerolipid	TAG	52:4	16:0	18:2	18:2	TAG 16:0-18:2-18:2	C55H98O6	UAWKISGGTGCUMP-HTUQFOBENA-N	CCCCCCCCCCCCCCCC(=O)OCC(COC(=O)CCCCCCCC\C=C/C=C\CCCCC)OC(=O)CCCCCCCC\C=C/C=C\CCCCC	14.2745	872.768	[M+NH4]+	89652	71.08291:173 77.03481:31 79.05397:194 81.06876:654 83.08703:207 85.10278:153 91.05386:102 93.06818:256 95.08527:696 97.09756:173 99.07756:51 105.06658:71 107.07764:31 107.0864:153 109.09892:522 111.08408:41 111.11828:102 113.09763:51 117.07822:10 119.08202:92 120.98019:21 121.09971:206 123.11556:408 125.09441:51 125.13544:51 127.11128:51 131.08195:20 133.10402:102 135.11697:175 137.13181:153 139.…	TRUE	FALSE	FALSE	FALSE	FALSE	TRUE	143828	49737.2	78797.2	128949	82328.2	67825.6	51138.8	141666	38566.6	84505.9	86640.6	113720	76391.2	107135	79481.3	103727	0.637715	0.495633	0.723108	0.85234	0.789186	0.559268
Glycerolipid	TAG	52:5	16:0	18:2	18:3	TAG 16:0-18:2-18:3	C55H96O6	DWJFHJOYYJJEBL-IXXGKOKVNA-N	CCCCCCCCCCCCCCCC(=O)OCC(COC(=O)CCCCCCCCC\C=C/C=C\C=C/CC)OC(=O)CCCCCCCC\C=C/C=C\CCCCC	14.072	870.751	[M+NH4]+	16725	71.08269:31 79.05375:51 81.06853:122 83.08553:61 91.04826:20 91.05095:41 93.07068:82 95.08368:102 97.09874:51 99.12511:10 105.06783:41 107.08765:82 107.09496:10 109.1002:82 117.0704:20 121.10107:102 123.11068:20 123.11224:71 128.95979:10 131.08339:31 133.10059:71 148.11725:10 153.17014:10 159.1254:10 163.14246:51 173.12283:20 175.15594:51 177.16525:61 183.10344:10 187.14619:41 189.16278:31 217.19…	TRUE	FALSE	FALSE	FALSE	FALSE	TRUE	24300.4	7503.06	11589.9	23398.6	16164.4	12885	9987.81	31194	5616.31	15847.8	17815.3	23268.6	16658.6	18056	15315.2	17998.6	0.896347	0.856062	0.946606	0.759311	0.914987	0.737587
Glycerolipid	TAG	54:7	16:0	18:2	20:5	TAG 16:0-18:2-20:5	C57H96O6	FCONRUOZUBBRAN-IQIFYHNNNA-N	CCCCCCCCCCCCCCCC(=O)OCC(COC(=O)CCC\C=C/C\C=C/C\C=C/C\C=C/C\C=C/CC)OC(=O)CCCCCCCC\C=C/C=C\CCCCC	14.0415	894.752	[M+NH4]+	29588	71.08407:102 79.05395:143 81.06873:342 83.08572:92 85.06373:51 85.10017:112 89.06157:10 91.0525:133 93.06953:143 95.04949:52 95.08526:308 97.09756:71 105.06658:112 107.08348:112 109.1004:258 111.11383:51 115.05512:31 117.06908:122 119.08203:112 121.10284:214 123.11715:173 125.09758:31 128.06113:41 129.06737:82 131.07713:31 131.08522:163 133.09917:143 135.117:153 137.13019:61 141.06712:31 143.0851…	TRUE	FALSE	FALSE	TRUE	FALSE	TRUE	4664.31	1863.62	2708.75	4216.56	6816.62	6638.06	5292.5	14713.5	29414.7	75941.9	72192.9	106713	33625.4	38711.3	30212.9	39682.5	0.0670092	0.023613	8.6e-06	0.0278533	0.0001189	0.110439
Glycerolipid	TAG	56:8	16:0	18:2	22:6	TAG 16:0-18:2-22:6	C59H98O6	QVEJXKXYAGMVMA-GPKNQBKENA-N	CCCCCCCCCCCCCCCC(=O)OCC(COC(=O)CC\C=C/C\C=C/C\C=C/C\C=C/C\C=C/C\C=C/CC)OC(=O)CCCCCCCC\C=C/C=C\CCCCC	14.155	920.768	[M+NH4]+	64593	71.05195:42 71.08644:562 77.03849:153 79.05393:589 81.06872:1671 83.04713:93 83.08442:665 85.10014:553 91.05517:814 93.06814:720 95.04809:112 95.0866:2057 97.06694:133 97.1017:429 99.07612:163 99.11404:143 103.05164:51 105.06799:417 107.08491:588 109.10184:1439 111.07958:143 111.11527:133 113.0916:41 113.13062:102 115.05205:92 117.0675:350 119.0866:592 121.10123:835 123.07953:71 123.11553:968 125…	TRUE	FALSE	FALSE	FALSE	TRUE	TRUE	12442.2	5104.88	7739.5	14441.4	12339.6	9672.38	10688.1	24617.3	20183	40156.8	39948.5	50183	156988	182003	201832	245155	0.32225	0.0058661	0.0019354	0.0176004	0.0018012	0.0001927
Glycerolipid	TAG	58:11	16:0	20:5	22:6	TAG 16:0-20:5-22:6	C61H96O6	UZFNMPJCAIVEGV-RJPYUBGTNA-N	CCCCCCCCCCCCCCCC(=O)OCC(COC(=O)CC\C=C/C\C=C/C\C=C/C\C=C/C\C=C/C\C=C/CC)OC(=O)CCC\C=C/C\C=C/C\C=C/C\C=C/C\C=C/CC	13.8356	942.744	[M+NH4]+	2010	79.05724:20 85.06454:10 93.06902:20 95.08199:31 105.06894:31 107.08878:10 117.09141:10 119.083:41 128.06053:10 129.07478:10 131.08623:41 137.09157:10 145.10844:20 147.12086:20 157.10072:31 159.1214:51 163.14742:10 169.1064:10 171.11217:31 173.12791:20 174.13556:10 183.12202:31 185.13031:31 187.11095:20 193.09059:10 199.14838:31 201.16441:82 203.18054:10 211.13849:20 211.16104:10 215.13858:20 221.…	TRUE	FALSE	FALSE	TRUE	TRUE	TRUE	140.625	84.25	150.812	249.75	559.938	659.812	644.562	1003.06	1961.88	4136.38	2970.5	3526.75	3313.44	3513.94	4347.38	4897.56	0.0016619	0.0072672	0.0017466	0.0114347	0.0001315	0.191767
Glycerolipid	TAG	58:11	16:0	20:5	22:6	TAG 16:0-20:5-22:6	C61H96O6	UZFNMPJCAIVEGV-RJPYUBGTNA-N	CCCCCCCCCCCCCCCC(=O)OCC(COC(=O)CC\C=C/C\C=C/C\C=C/C\C=C/C\C=C/C\C=C/CC)OC(=O)CCC\C=C/C\C=C/C\C=C/C\C=C/C\C=C/CC	13.9296	942.75	[M+NH4]+	1761	77.03578:20 79.0537:41 81.06721:31 85.10512:10 91.05628:51 95.08637:51 105.075:31 107.08176:31 109.10456:31 117.06423:20 117.06576:51 121.09946:31 131.08171:20 133.09891:51 142.07747:10 145.10031:41 147.11781:31 157.09581:31 159.11111:51 169.10866:31 171.11813:71 173.1302:61 175.14282:20 182.10245:10 183.11293:31 185.12885:61 187.14421:41 197.13109:41 199.14886:41 201.1629:143 203.17903:20 211.14…	TRUE	FALSE	FALSE	TRUE	TRUE	TRUE	90.6875	71.9375	16.5625	17.9375	58.3125	18.9375	44.625	68.5625	2109.62	4981.12	2816.19	3956.06	2981.19	3344.75	2781.44	4820.31	0.941169	0.0123864	0.0049722	0.0123978	0.0049958	0.984183
Glycerolipid	TAG	60:10	16:0	22:5	22:5	TAG 16:0-22:5-22:5	C63H102O6	XMRBIWWWAIEADV-YYQFQRANNA-N	CCCCCCCCCCCCCCCC(=O)OCC(COC(=O)CCCCC\C=C/C\C=C/C\C=C/C\C=C/C\C=C/CC)OC(=O)CCCCC\C=C/C\C=C/C\C=C/C\C=C/C\C=C/CC	14.2065	972.79	[M+NH4]+	1197	91.05056:20 105.0703:20 107.09162:10 131.08456:31 133.10991:10 143.08282:20 161.1281:31 173.12605:41 201.15643:20 213.16479:20 215.18623:20 239.21115:10 257.24249:10 293.22549:10 295.2439:31 311.27179:10 313.26385:41 339.29959:10 369.27252:20 582.48022:10 625.52203:204 626.54224:20 627.53857:51 649.50281:31 651.52155:20 653.51819:31 671.46094:10 690.88477:10 699.51898:82 877.7019:61 878.70538:20 …	TRUE	FALSE	FALSE	FALSE	FALSE	TRUE	192.375	207.562	226.812	367.75	798	1118.19	1103.81	2318.19	1106.31	2420.06	2122.44	1651.44	1173.44	1129.94	1661.75	1555.25	0.0471201	0.0110371	0.0001914	0.309617	0.903931	0.209769
Glycerolipid	TAG	60:11	16:0	22:5	22:6	TAG 16:0-22:5-22:6	C63H100O6	QVOHTEKWCOOZBV-JTUQIUDNNA-N	CCCCCCCCCCCCCCCC(=O)OCC(COC(=O)CC\C=C/C\C=C/C\C=C/C\C=C/C\C=C/C\C=C/CC)OC(=O)CCCCC\C=C/C\C=C/C\C=C/C\C=C/C\C=C/CC	14.1131	970.781	[M+NH4]+	2732	85.1002:10 91.05388:31 95.08529:41 107.09081:10 121.09663:20 133.09917:20 157.10312:31 161.13234:31 169.10521:31 171.11098:20 175.14865:41 183.11887:41 185.13098:31 187.15021:31 195.10605:10 199.14507:31 201.16508:51 213.16338:31 215.18066:41 223.14876:20 225.15761:20 227.18182:41 267.21548:10 269.22113:31 293.22122:41 309.22955:10 311.23001:41 313.28186:61 387.28949:31 585.84259:10 623.49463:257…	TRUE	FALSE	FALSE	FALSE	TRUE	TRUE	309.688	204.438	276.5	320.062	918.812	757.688	1172.62	2418	1827.69	4174.06	3189.19	3258.06	4639.25	5998.62	7161	7081.38	0.0699578	0.0097742	0.0020541	0.0263209	0.0004219	0.0065394
Glycerolipid	TAG	50:4	16:1	16:1	18:2	TAG 16:1-16:1-18:2	C53H94O6	RHRCBOCRXHUAJG-AQTXVFEXNA-N	CCCCCCCC\C=C/CCCCCC(=O)OCC(COC(=O)CCCCCCCC\C=C/C=C\CCCCC)OC(=O)CCCCC\C=C/CCCCCCCC	13.9866	844.736	[M+NH4]+	5246	79.05324:20 79.64393:3 81.06802:65 83.08628:44 93.06467:7 93.06875:31 93.08099:3 95.08447:75 97.10093:31 105.07298:17 107.0841:20 109.10103:48 111.07728:10 114.09827:3 119.08114:10 121.09882:34 123.11781:34 133.09985:17 135.10785:7 135.11768:44 137.13087:17 147.11536:17 149.13127:17 153.12915:10 161.1313:24 161.151:3 163.1398:20 165.16074:17 175.14944:27 177.15871:10 187.99545:3 201.17195:3 203.1…	FALSE	TRUE	FALSE	FALSE	FALSE	TRUE	11504.8	3488.62	5605.12	9893.06	4020	3232.94	2814.25	8867.5	1718.69	3831.31	4750.81	6224.62	3682.62	4605.88	3967.94	5733.62	0.260522	0.144701	0.190877	0.733509	0.877845	0.738556
Glycerolipid	TAG	51:4	16:1	17:1	18:2	TAG 16:1-17:1-18:2	C54H96O6	PSEBMBUFQYJLRW-UNVYVJMKNA-N	CCCCCCCCC\C=C/CCCCCC(=O)OC(COC(=O)CCCCCCCC\C=C/C=C\CCCCC)COC(=O)CCCCC\C=C/CCCCCCCC	14.1236	858.755	[M+NH4]+	904	95.08629:31 125.13502:10 225.22044:10 233.22841:10 242.24507:10 261.21994:20 263.24191:41 265.2648:31 292.9668:10 337.28546:20 391.00967:20 466.98404:10 472.99741:31 513.4696:10 521.45148:82 544.99213:10 547.46521:92 547.49164:71 549.49072:219 554.84167:10 559.47742:51 561.48486:323 573.48352:61 575.49902:92 577.52478:20 578.90558:10 585.65338:10 587.49176:61 587.50543:102 589.47003:10 599.49072:…	FALSE	TRUE	FALSE	FALSE	FALSE	TRUE	1280.25	529.688	691.688	1157.56	711.25	759.875	547.062	1478.38	405.125	811.438	1140.62	1150.56	667.75	762	1040	1328.5	0.886987	0.885489	0.886749	0.992108	0.777061	0.763393
Glycerolipid	TAG	52:6	16:1	18:2	18:3	TAG 16:1-18:2-18:3	C55H94O6	ZNWMQGQSWLJCNF-YOPYQNEPNA-N	CCCCCCCC\C=C/CCCCCC(=O)OCC(COC(=O)CCCCCCCCC\C=C/C=C\C=C/CC)OC(=O)CCCCCCCC\C=C/C=C\CCCCC	13.927	868.734	[M+NH4]+	3480	77.03784:5 81.06297:15 81.06805:20 91.04909:10 93.06879:20 95.07902:10 95.08176:36 107.08708:20 119.08582:25 123.11631:15 135.10628:15 145.10304:15 149.13307:10 161.13139:10 163.14349:20 173.12946:15 176.13495:5 219.21133:15 237.216:36 243.20746:41 245.22711:15 259.19629:15 261.22412:56 263.23697:31 311.2562:51 317.24374:20 335.25671:20 337.27734:31 339.28845:10 523.47015:15 545.46967:5 547.47168…	FALSE	TRUE	FALSE	FALSE	FALSE	TRUE	3036.94	1017.12	1669.56	2160.88	2997	3035.12	2369.62	6575.62	2344.19	6282.38	5724.75	8402.31	2409.38	2804.44	1574.31	3275.69	0.141103	0.0309628	0.366285	0.263971	0.274531	0.0511979
Glycerolipid	TAG	56:9	16:1	18:2	22:6	TAG 16:1-18:2-22:6	C59H96O6	WFYHJYHILQFBRC-JBUVGVCENA-N	CCCCCCCC\C=C/CCCCCC(=O)OCC(COC(=O)CC\C=C/C\C=C/C\C=C/C\C=C/C\C=C/C\C=C/CC)OC(=O)CCCCCCCC\C=C/C=C\CCCCC	13.8965	918.75	[M+NH4]+	7963	71.08372:14 73.24463:3 77.03937:20 79.05357:58 81.06962:112 83.08662:44 85.06202:14 91.05343:58 93.0691:58 95.08345:116 97.06375:24 97.09851:41 99.08273:14 105.06901:41 107.08302:37 109.09845:71 111.07914:10 111.11483:17 115.15453:3 117.06858:27 119.08461:48 121.10232:95 123.11663:65 125.09232:20 129.07164:24 131.08467:48 133.10025:58 135.11481:78 137.13293:37 139.1111:17 143.08292:24 145.0983:27…	FALSE	TRUE	FALSE	FALSE	TRUE	TRUE	1698.94	592.062	1164.69	2072	2329.56	2753.38	2238.69	5486.75	4632.19	9467.62	7945.31	11651	15536.2	17108.1	20492.5	22246.9	0.0719671	0.0151588	0.0010439	0.0201063	9.81e-05	0.0027204
Glycerolipid	TAG	53:3	17:0	18:1	18:2	TAG 17:0-18:1-18:2	C56H102O6	JCUUGUUICZELJG-KDHVXLOFNA-N	CCCCCCCCCCCCCCCCC(=O)OCC(COC(=O)CCCCCCCC\C=C/C=C\CCCCC)OC(=O)CCCCCCCCC\C=C/CCCCCC	14.6839	888.798	[M+NH4]+	1609	81.0713:41 83.08703:41 245.22334:31 261.26352:10 265.25586:20 339.29416:31 575.48871:133 577.52124:31 587.50189:21 587.53607:21 589.5144:379 591.52698:163 601.48547:41 601.5166:173 601.55469:41 603.53217:112 607.50397:10 615.51453:41 615.54254:122 617.52533:31 617.56042:51 883.84973:10 888.77673:82 888.81042:112	TRUE	TRUE	FALSE	FALSE	FALSE	TRUE	2945.38	1244.5	1982.12	3514.88	1258.38	1253.19	1095	2520.62	680.875	1261.12	1046.69	1033.5	1232.19	1557.25	1723.56	1391.12	0.190706	0.0637199	0.156152	0.186461	0.878039	0.0260175
Glycerolipid	TAG	53:4	17:1	18:1	18:2	TAG 17:1-18:1-18:2	C56H100O6	QRDLWPASSJSSME-XMOCMKDKNA-N	CCCCCCCCC\C=C/CCCCCC(=O)OCC(COC(=O)CCCCCCCC\C=C/C=C\CCCCC)OC(=O)CCCCCCCCC\C=C/CCCCCC	14.4142	886.78	[M+NH4]+	1268	81.06821:31 111.11614:31 123.11174:20 226.97878:41 235.23834:10 247.24844:10 263.23923:41 265.25061:51 268.99774:31 313.27057:20 325.28271:31 387.32132:10 390.98407:31 433.01071:20 456.89487:10 472.99686:21 515.46271:10 523.46967:216 549.48682:456 551.47626:51 551.51276:175 573.47614:41 575.49841:41 577.51404:122 587.44672:20 587.50482:302 589.52423:315 599.49011:82 601.48157:52 601.5127:271 603.…	FALSE	TRUE	FALSE	FALSE	FALSE	TRUE	2669.06	867.875	1425.56	2945.88	952.812	1361.44	951.75	2249.56	428.438	1032.38	803.938	744.375	679.875	1341.38	1063.5	775.562	0.344191	0.0866614	0.0985759	0.106518	0.269838	0.316201
Glycerolipid	TAG	53:5	17:1	18:2	18:2	TAG 17:1-18:2-18:2	C56H98O6	AURJQWHMZBLBDL-KQFCDIKPNA-N	CCCCCCCCC\C=C/CCCCCC(=O)OCC(COC(=O)CCCCCCCC\C=C/C=C\CCCCC)OC(=O)CCCCCCCC\C=C/C=C\CCCCC	14.1707	884.768	[M+NH4]+	548	83.04929:10 109.09988:10 121.09762:20 183.11246:10 187.00671:20 261.23126:10 263.23499:20 313.27847:10 325.27551:20 511.43204:10 547.48187:20 550.49011:20 554.42316:10 561.46161:31 561.49506:41 571.51892:10 575.50256:20 578.56976:10 585.47943:71 587.49536:173 589.50446:31 597.5166:10 599.49786:163 601.51697:41 601.54816:20 603.53259:31 615.51843:20 858.80084:20 867.74249:31 884.74872:31	FALSE	TRUE	FALSE	FALSE	FALSE	TRUE	1027.69	259.312	423.125	1044.25	371.312	423.25	345	889.5	198.312	535.812	569.375	499.562	334.5	389.312	953.938	509	0.479442	0.32229	0.586791	0.726661	0.842823	0.580918
Glycerolipid	TAG	58:7	18:0	18:1	22:6	TAG 18:0-18:1-22:6	C61H104O6	YDPMCTJRBOYHEK-RBCPUQDENA-N	CCCCCCCCCCCCCCCCCC(=O)OCC(COC(=O)CC\C=C/C\C=C/C\C=C/C\C=C/C\C=C/C\C=C/CC)OC(=O)CCCCCCCCC\C=C/CCCCCC	14.7196	950.81	[M+NH4]+	868	72.05669:10 105.06636:10 121.09948:20 171.11806:31 197.12897:20 201.16676:20 213.16714:31 227.17722:31 265.24683:41 269.21381:41 293.22568:71 311.21967:20 311.23459:51 339.29449:41 578.50598:31 579.51764:41 599.50543:20 600.49731:41 601.48651:31 604.53192:31 605.55225:627 606.51782:22 606.56299:31 621.51929:10 623.5047:41 626.52759:31 627.53094:51 649.513:173 651.53534:133 668.79407:10 677.54657:…	TRUE	TRUE	FALSE	FALSE	TRUE	TRUE	93.6875	414.125	330.812	298.688	53.4375	145.25	133.25	231.125	94.4375	331.25	106.062	136.375	2700.19	2784.25	3292.19	2739.31	0.112096	0.229883	2.9e-06	0.705726	1.3e-06	1.8e-06
Glycerolipid	TAG	62:12	18:0	22:6	22:6	TAG 18:0-22:6-22:6	C65H102O6	POVKTGOFOJWXMA-AUFKHNQDNA-N	CCCCCCCCCCCCCCCCCC(=O)OCC(COC(=O)CC\C=C/C\C=C/C\C=C/C\C=C/C\C=C/C\C=C/CC)OC(=O)CC\C=C/C\C=C/C\C=C/C\C=C/C\C=C/C\C=C/CC	14.3332	996.802	[M+NH4]+	314	93.07085:10 119.08199:31 145.10391:10 159.11844:20 185.13287:20 187.15791:20 293.21646:20 293.23096:41 311.24005:61 338.2822:10 341.29385:31 651.53271:281 672.48529:31 695.47632:20 695.5061:51 698.52698:31 928.73657:51 928.77527:31 954.74017:174 954.75323:354 979.75537:31 994.08063:10 996.75592:31 996.79602:112 996.84503:41	TRUE	FALSE	FALSE	FALSE	TRUE	TRUE	66.3125	124.312	166.5	112.5	27.5	19	105.188	0	15.1875	25.5625	59.5	77.75	1031.25	819.312	962.938	1418.62	0.0426132	0.0277215	0.0045564	0.817952	0.0034361	0.0039064
Glycerolipid	TAG	54:3	18:1	18:1	18:1	TAG 18:1-18:1-18:1	C57H104O6	JSSROPRCXOAGCW-BUTYCLJRSA-N	CCCCCC\C=C/CCCCCCCCCC(=O)OCC(COC(=O)CCCCCCCCC\C=C/CCCCCC)OC(=O)CCCCCCCCC\C=C/CCCCCC	14.8489	902.811	[M+NH4]+	15823	79.05001:20 79.05503:41 81.06856:92 83.08168:61 93.07475:10 95.08503:92 97.10149:82 109.1016:92 111.11206:41 119.08173:10 121.10252:82 123.11526:71 135.11992:61 137.12982:41 145.40625:10 149.12497:51 151.14761:41 161.13191:31 165.16679:31 177.16682:41 191.18007:51 205.19878:31 239.23296:41 241.18785:10 245.23419:20 247.23338:92 263.24426:83 265.25107:398 275.28705:41 291.26678:41 293.28568:82 339…	FALSE	TRUE	FALSE	FALSE	FALSE	FALSE	34745.1	17853.8	20883	35958.6	8456.62	9785.12	9080.12	21735.9	6336.75	14941.5	9779.5	10940.1	12207.3	13515.5	13909.3	13032.2	0.0366323	0.0148539	0.0551892	0.644207	0.795381	0.230514
Glycerolipid	TAG	54:4	18:1	18:1	18:2	TAG 18:1-18:1-18:2	C57H102O6	XIKRLPVGWJXBJH-QFACYJBGNA-N	CCCCCC\C=C/CCCCCCCCCC(=O)OCC(COC(=O)CCCCCCCC\C=C/C=C\CCCCC)OC(=O)CCCCCCCCC\C=C/CCCCCC	14.5591	900.795	[M+NH4]+	22324	71.08502:41 79.05369:71 79.49712:21 81.0672:206 83.08545:112 85.10119:31 93.06651:71 95.0822:173 97.10003:133 105.07059:41 107.08461:71 109.10153:102 111.11199:41 121.09315:20 121.10091:92 123.11678:102 125.12876:31 133.10202:51 135.11987:122 137.13142:61 145.10524:10 149.1284:51 151.1476:31 153.12799:51 161.13548:61 163.14761:61 165.15771:31 173.14853:10 175.14819:41 189.16827:41 191.17619:31 20…	FALSE	TRUE	FALSE	FALSE	FALSE	TRUE	34882.5	26085.2	34805.7	42601.6	16318	15307.4	15739.4	36476.4	12134.8	21363.4	15232.6	15554.1	15859.1	22776.7	17629.2	14422.7	0.0694864	0.0031019	0.0045114	0.410074	0.570957	0.568185
Glycerolipid	TAG	56:3	18:1	18:1	20:1	TAG 18:1-18:1-20:1	C59H108O6	DVVVWSWPMOHCJM-ANKPWZAQNA-N	CCCCCCCC\C=C/CCCCCCCCCC(=O)OCC(COC(=O)CCCCCCCCC\C=C/CCCCCC)OC(=O)CCCCCCCCC\C=C/CCCCCC	15.2462	930.845	[M+NH4]+	1432	81.06722:20 93.0706:10 95.08634:41 263.24191:31 265.25101:51 293.29047:41 321.32562:20 330.95413:10 575.48865:122 577.50769:71 577.55176:51 597.47137:31 601.5235:71 603.53217:346 605.54767:102 625.49213:20 625.53448:41 627.52979:51 627.5545:51 629.5318:92 629.5672:51 631.55481:465 631.57251:466 632.55859:31 633.59875:184 653.54529:61 654.54834:10 657.58032:175 659.59351:31 908.62207:10 909.7962:7…	FALSE	TRUE	FALSE	FALSE	FALSE	FALSE	1976.44	1570.25	2175.38	2567	993.25	1154.94	863	2314.44	983.812	1070.44	1036.88	1454.44	967.375	1293.12	1127.12	1371.06	0.107956	0.0070792	0.0079535	0.597547	0.695458	0.716863
Glycerolipid	TAG	58:8	18:1	18:1	22:6	TAG 18:1-18:1-22:6	C61H102O6	VULLTLRIKFDMHX-IOGDVMKPNA-N	CCCCCC\C=C/CCCCCCCCCC(=O)OCC(COC(=O)CC\C=C/C\C=C/C\C=C/C\C=C/C\C=C/C\C=C/CC)OC(=O)CCCCCCCCC\C=C/CCCCCC	14.4083	948.803	[M+NH4]+	5948	79.0528:31 81.06884:133 83.08196:51 85.10156:31 91.05393:51 95.08258:133 97.09624:41 105.06808:61 107.085:31 109.10046:102 117.07064:41 119.08823:41 121.10442:71 123.11561:31 128.05635:10 131.08522:31 133.10243:51 135.117:82 139.11331:31 145.10394:61 147.11804:41 149.13225:41 155.08653:31 157.09955:31 159.1131:51 161.13051:51 163.14801:51 169.10333:51 171.1183:71 173.13037:51 175.14111:61 177.157…	FALSE	TRUE	FALSE	FALSE	TRUE	TRUE	2162.88	1641.81	2683.12	4042.88	2812.31	2450.75	4049.88	6667.88	1083.5	2166.31	1054.25	1659.06	14820.2	16348.2	16780.4	14745.4	0.255845	0.0964494	2e-06	0.0447656	3.86e-05	3e-07
Glycerolipid	TAG	54:5	18:1	18:2	18:2	TAG 18:1-18:2-18:2	C57H100O6	POVFMDGBZDJLAN-BHFHHPLZNA-N	CCCCCC\C=C/CCCCCCCCCC(=O)OCC(COC(=O)CCCCCCCC\C=C/C=C\CCCCC)OC(=O)CCCCCCCC\C=C/C=C\CCCCC	14.3053	898.782	[M+NH4]+	22786	71.08398:41 73.0675:10 79.05257:102 81.07115:261 83.0843:194 85.06749:31 91.05369:61 93.06527:61 93.07072:153 95.0837:331 97.10015:102 99.08439:41 103.05862:10 105.06926:102 107.08472:102 109.10165:210 111.08236:31 111.11656:82 119.08176:41 121.10255:153 123.11687:102 125.13043:31 129.12958:10 131.08167:31 133.1021:61 135.11011:41 135.11504:153 137.13481:51 145.1002:31 147.11598:61 149.13535:92 1…	FALSE	TRUE	FALSE	FALSE	FALSE	TRUE	33657.9	14700.8	28236.9	34173.4	20104.6	18548.1	18583.3	36735.1	10612.4	25297.7	20465.6	23869.6	17350	22242.3	20957.8	19042.7	0.532214	0.222839	0.183718	0.557626	0.482271	0.964117
Glycerolipid	TAG	54:6	18:1	18:2	18:3	TAG 18:1-18:2-18:3	C57H98O6	PXFPBVBCKXAEFP-QZOFRBEONA-N	CCCCCC\C=C/CCCCCCCCCC(=O)OCC(COC(=O)CCCCCCCCC\C=C/C=C\C=C/CC)OC(=O)CCCCCCCC\C=C/C=C\CCCCC	14.1047	896.767	[M+NH4]+	24248	77.04409:10 79.49426:10 81.07066:102 91.05319:51 93.07159:61 95.08459:163 97.09827:20 107.07839:20 107.08862:51 109.09673:92 119.08437:31 121.09898:61 123.11482:61 133.09676:31 135.11293:51 137.12938:31 142.57851:10 146.1076:10 147.11383:31 149.13144:31 155.08397:10 159.10873:31 161.13329:41 163.1418:41 171.12857:10 173.1277:51 174.13162:10 175.14778:92 177.15892:20 187.1474:31 200.04114:10 201.1…	FALSE	TRUE	FALSE	FALSE	FALSE	TRUE	12508.3	5081.19	7086.25	13958.2	41238.4	48298.4	41660.2	84413.2	7841.31	20651.1	19989	27858.9	13964.1	14606.1	12939.5	15878.1	0.0208286	0.08967	0.0783336	0.0201713	0.030879	0.337759
Glycerolipid	TAG	56:4	18:1	18:2	20:1	TAG 18:1-18:2-20:1	C59H106O6	HJTVQGCEWGLLJL-VCFWUCCFNA-N	CCCCCCCC\C=C/CCCCCCCCCC(=O)OCC(COC(=O)CCCCCCCCC\C=C/CCCCCC)OC(=O)CCCCCCCC\C=C/C=C\CCCCC	14.8955	928.828	[M+NH4]+	2323	77.03938:10 81.07091:41 83.08407:31 93.06505:10 95.08211:41 107.09037:10 109.10293:31 119.09084:10 133.10361:10 135.11983:31 149.13353:31 203.17874:20 239.24185:10 245.22554:31 247.24245:51 263.23764:82 265.24673:92 285.24985:10 293.28601:61 332.95456:10 337.27557:31 339.27887:41 365.2951:31 571.56708:10 573.48462:51 575.48657:41 575.51025:51 577.52594:41 598.48364:31 599.49884:41 601.27576:22 60…	FALSE	TRUE	FALSE	FALSE	FALSE	TRUE	4027.88	2996.5	4144.62	5703.44	1311.94	1505.06	1614.56	2909.38	1089.56	1764.94	1490.88	1615.75	1593.62	1595.06	1915.69	1882.94	0.0116858	0.003226	0.0200005	0.411899	0.826874	0.181197
Glycerolipid	TAG	56:5	18:1	18:2	20:2	TAG 18:1-18:2-20:2	C59H104O6	XOBSYDDZBBHRQA-AJVFMDHANA-N	CCCCCC\C=C/CCCCCCCCCC(=O)OCC(COC(=O)CCCCCCCCC\C=C/C\C=C/CCCCC)OC(=O)CCCCCCCC\C=C/C=C\CCCCC	14.6949	926.822	[M+NH4]+	3803	81.06938:31 83.09152:31 109.10117:51 119.08901:10 123.11329:20 131.08286:10 135.11461:31 161.12798:20 173.13336:10 245.22742:20 261.21533:31 263.23273:51 265.2464:61 267.26541:10 271.22418:31 289.25485:92 293.28568:31 334.88272:10 339.28372:61 345.28207:41 575.49304:41 577.50867:41 578.51953:41 579.53461:31 599.51239:133 601.50732:166 601.5177:229 601.68726:10 603.52637:289 604.52844:31 625.51093…	FALSE	TRUE	FALSE	FALSE	FALSE	TRUE	5248.12	2761.56	3698	5004.25	5082.31	5958.69	5096.56	14887.6	1192.56	2010.62	822.938	1348.56	1660.62	1980.75	2018.5	2083.38	0.231829	0.004193	0.0291985	0.0737733	0.092432	0.0671573
Glycerolipid	TAG	58:7	18:1	18:2	22:4	TAG 18:1-18:2-22:4	C61H104O6	HEPVDSRPLFKMJC-SCPVOKBRNA-N	CCCCCC\C=C/CCCCCCCCCC(=O)OCC(COC(=O)CCCCCCCC\C=C/C\C=C/C\C=C/C\C=C/CC)OC(=O)CCCCCCCC\C=C/C=C\CCCCC	14.5267	950.816	[M+NH4]+	3435	77.0383:10 81.06598:31 83.08294:31 91.05093:31 93.07746:10 95.08227:82 103.03567:10 106.07239:10 107.08469:41 109.09867:71 119.08484:41 121.10101:31 123.12157:31 133.09726:20 135.11671:31 145.09348:10 163.14775:20 171.11621:41 173.13197:41 184.09357:10 189.15681:31 201.16077:31 203.18292:71 204.1877:31 213.16718:20 215.17:31 217.19881:41 227.18788:20 229.19983:31 231.20778:20 231.22279:10 245.225…	FALSE	TRUE	FALSE	FALSE	FALSE	TRUE	1551.5	1726.19	1784.38	2267.5	3065.56	2264.31	2664.5	7390.38	3073.62	7269.94	4543.81	4571.56	3193.94	2139.81	4797.44	2654.62	0.189665	0.0383573	0.0618822	0.516775	0.641096	0.162191
Glycerolipid	TAG	58:8	18:1	18:2	22:5	TAG 18:1-18:2-22:5	C61H102O6	DHJYKLKHBIOJDA-YDQBNGOGNA-N	CCCCCC\C=C/CCCCCCCCCC(=O)OCC(COC(=O)CCCCC\C=C/C\C=C/C\C=C/C\C=C/C\C=C/CC)OC(=O)CCCCCCCC\C=C/C=C\CCCCC	14.2541	948.793	[M+NH4]+	4293	77.04205:10 81.06983:41 83.08297:41 85.10649:10 91.05365:41 93.06796:41 95.08368:71 97.09874:20 105.06492:20 107.09348:10 109.09723:31 121.10259:41 123.11691:31 130.07568:10 133.09402:31 135.11838:41 145.1003:20 149.13026:20 157.11876:10 159.12531:10 171.11438:71 175.14836:41 183.11858:10 185.13835:41 189.16652:41 191.14516:31 196.11409:10 201.16278:92 211.14502:41 211.15732:10 213.16512:31 215.1…	FALSE	TRUE	FALSE	FALSE	FALSE	TRUE	2059.62	1512.19	2254.25	744.875	1974.81	2383.69	2956.06	5758.5	3480.44	9426.44	5868.56	5222.56	6259.75	5540.25	7518.69	5733.25	0.127188	0.0150816	0.0001698	0.121051	0.0208754	0.849022
Glycerolipid	TAG	58:9	18:1	20:4	20:4	TAG 18:1-20:4-20:4	C61H100O6	SBTWVYCOKCLVIP-GNVBEXTCNA-N	CCCCCC\C=C/CCCCCCCCCC(=O)OCC(COC(=O)CCC\C=C/C\C=C/C\C=C/C\C=C/CCCCC)OC(=O)CCC\C=C/C\C=C/C\C=C/C\C=C/CCCCC	14.1836	946.784	[M+NH4]+	10955	79.05238:41 81.07222:31 83.08411:31 91.05215:31 93.07054:41 105.06911:61 107.08604:31 111.11642:31 119.08165:41 121.104:41 131.08481:31 133.09714:61 161.13193:31 163.14583:31 171.11426:31 173.13187:31 175.15196:41 177.16125:20 185.13248:71 187.1498:41 189.16252:41 191.18211:31 199.15062:51 201.15466:31 203.17879:194 213.16913:41 227.1814:20 265.24908:41 267.94669:10 269.22534:153 283.24228:20 287…	FALSE	TRUE	TRUE	FALSE	FALSE	TRUE	2969.06	1754.75	2259.5	3980.12	4954.31	6043.81	5321.69	11757.8	3888.88	5681.88	5953.25	8486.75	22788.1	22522.9	36427.3	30495.5	0.0425197	0.021909	0.0042823	0.603419	0.0012895	0.0007198
Glycerolipid	TAG	60:9	18:1	20:4	22:4	TAG 18:1-20:4-22:4	C63H104O6	HNLFQKIBLDESLU-BSYWFEAVNA-N	CCCCCC\C=C/CCCCCCCCCC(=O)OCC(COC(=O)CCCCCCCC\C=C/C\C=C/C\C=C/C\C=C/CC)OC(=O)CCC\C=C/C\C=C/C\C=C/C\C=C/CCCCC	14.4515	974.819	[M+NH4]+	994	203.17513:20 337.28131:5 599.479:10 601.51196:15 625.50861:25 627.51807:20 629.53778:15 650.50354:15 651.52948:15 653.55499:56 675.54059:31 677.54431:25 701.55487:15 892.73047:41 953.6557:5 954.75836:188 954.83246:15 957.74695:15 957.82123:10 974.78979:41	FALSE	TRUE	TRUE	FALSE	FALSE	TRUE	307.688	200.438	380.125	512.5	984.5	1176.56	1255.31	2663.38	202.5	826.5	508.312	791.625	1196.12	1286.38	1945.81	1664.38	0.0540284	0.195548	0.0007317	0.063066	0.994142	0.0059633
Glycerolipid	TAG	60:12	18:1	20:5	22:6	TAG 18:1-20:5-22:6	C63H98O6	JYQMBTBKFXOONK-ATLRXMOJNA-N	CCCCCC\C=C/CCCCCCCCCC(=O)OCC(COC(=O)CC\C=C/C\C=C/C\C=C/C\C=C/C\C=C/C\C=C/CC)OC(=O)CCC\C=C/C\C=C/C\C=C/C\C=C/C\C=C/CC	14.0383	968.762	[M+NH4]+	5656	93.06827:31 95.08673:31 103.05463:10 107.08796:20 117.0707:41 119.08675:31 129.06746:20 131.08368:41 135.1171:31 143.08189:20 159.11324:20 169.09981:41 171.10924:20 173.13609:31 175.14314:20 185.13109:31 187.14645:41 197.13139:31 199.14915:31 201.16119:61 211.14134:31 213.16554:31 225.16618:31 227.17981:20 235.1703:10 265.24042:31 267.20175:61 285.21948:31 293.23105:41 311.24509:61 313.27203:31 3…	FALSE	TRUE	FALSE	TRUE	TRUE	TRUE	168.5	76.75	138.312	205	74.5	1121.19	71.75	1808.75	27.25	106.188	102.938	1242.69	15993.3	18974.5	25225.9	25159.9	0.240135	0.501496	0.0027264	0.468332	0.0024093	0.00254
Glycerolipid	TAG	60:12	18:1	20:5	22:6	TAG 18:1-20:5-22:6	C63H98O6	JYQMBTBKFXOONK-ATLRXMOJNA-N	CCCCCC\C=C/CCCCCCCCCC(=O)OCC(COC(=O)CC\C=C/C\C=C/C\C=C/C\C=C/C\C=C/C\C=C/CC)OC(=O)CCC\C=C/C\C=C/C\C=C/C\C=C/C\C=C/CC	13.8891	968.768	[M+NH4]+	3181	79.06271:10 81.06744:31 85.065:10 97.10169:10 133.10237:20 165.16174:10 171.11462:20 181.10442:10 201.15704:41 213.16127:20 223.15927:20 265.25177:41 293.22604:31 305.15677:10 311.23499:41 339.26892:20 339.28452:71 383.25461:10 599.5061:20 619.49915:31 621.47778:31 623.48425:298 647.49084:41 649.48853:102 649.49927:225 649.52808:206 669.47363:102 669.51013:61 693.48315:41 901.71411:10 949.71985:7…	FALSE	TRUE	FALSE	TRUE	TRUE	TRUE	115.5	20.6875	88.1875	147.812	1147.19	1059	1335.38	2171.62	1806.81	3604.5	1705.06	2820.38	6526.56	7811	10390.3	10153.8	0.0129336	0.0128754	0.0026752	0.0872805	0.0002847	0.0009555
Glycerolipid	TAG	62:13	18:1	22:6	22:6	TAG 18:1-22:6-22:6	C65H100O6	LIWGBSUBZQSLON-JFCVYCDRNA-N	CCCCCC\C=C/CCCCCCCCCC(=O)OCC(COC(=O)CC\C=C/C\C=C/C\C=C/C\C=C/C\C=C/C\C=C/CC)OC(=O)CC\C=C/C\C=C/C\C=C/C\C=C/C\C=C/C\C=C/CC	14.0652	994.783	[M+NH4]+	2743	79.04881:41 79.05257:82 81.06734:122 83.08688:61 87.29407:10 91.05504:112 93.06664:71 95.08784:102 97.10017:41 105.07073:71 107.08475:112 109.10168:71 117.07344:61 118.07243:10 119.08335:61 121.0995:92 129.06552:41 131.08334:92 133.10217:71 135.11838:82 137.12991:41 143.07816:31 145.10028:61 147.11436:41 149.09579:51 149.13026:41 155.07924:31 157.09929:61 159.11816:92 161.13203:71 167.07996:31 16…	FALSE	TRUE	FALSE	FALSE	TRUE	TRUE	75	27.375	31.875	105.812	147.938	92.8125	146.688	264.375	320.875	731.25	532.875	592.875	10594.7	9542.62	11244	9432.81	0.0447196	0.0090363	0.0001685	0.006238	0.0001636	0.0001282
Glycerolipid	TAG	56:8	18:2	18:2	20:4	TAG 18:2-18:2-20:4	C59H98O6	SFRYBXSVNJEWEH-OTSYZDSKNA-N	CCCCC\C=C/C\C=C/C\C=C/C\C=C/CCCC(=O)OCC(COC(=O)CCCCCCCC\C=C/C=C\CCCCC)OC(=O)CCCCCCCC\C=C/C=C\CCCCC	14.0434	920.77	[M+NH4]+	60197	79.05376:92 81.06347:82 81.06982:184 83.08682:71 85.09867:31 87.07797:10 91.05366:163 92.06212:10 93.06797:112 95.08507:204 97.06539:31 97.10154:82 105.06784:61 105.07073:92 107.08767:92 109.10168:122 111.11363:31 115.07612:10 117.07194:61 119.08646:102 121.09488:31 121.09798:122 123.11696:102 129.06879:51 131.08017:71 133.09898:143 135.11681:92 137.13165:51 145.09698:41 147.11447:61 149.13037:51…	FALSE	FALSE	TRUE	FALSE	FALSE	TRUE	11404.8	3725.69	7678.31	14534.8	11785.2	6968.19	8205	19620.8	18970	42313.8	39635.8	47773.8	150828	183506	187337	208867	0.553923	0.0060579	0.00051	0.0101778	0.000455	3.84e-05
Glycerolipid	TAG	58:10	18:2	18:2	22:6	TAG 18:2-18:2-22:6	C61H98O6	HIFJUYSQDGCSIO-HEDNGCHZNA-N	CCCCC\C=C/C=C\CCCCCCCCC(=O)OCC(COC(=O)CC\C=C/C\C=C/C\C=C/C\C=C/C\C=C/C\C=C/CC)OC(=O)CCCCCCCC\C=C/C=C\CCCCC	13.9823	944.769	[M+NH4]+	8253	79.04995:31 79.05371:51 81.06722:184 83.0842:51 89.04267:10 91.05359:102 92.05664:10 93.06927:71 95.08362:163 97.06532:31 105.0692:51 106.03458:10 107.08174:51 107.73975:10 109.09865:102 111.11354:31 117.07031:51 119.08174:51 121.10098:133 123.11685:82 129.06866:31 131.08005:51 133.0956:41 135.11668:61 145.10364:51 147.11774:92 149.12849:51 157.09572:41 159.11636:92 161.132:82 163.14232:31 169.09…	FALSE	FALSE	FALSE	FALSE	TRUE	TRUE	1001.81	644.75	699.438	1457.69	5807.62	7551	6489.31	12308.1	3362	6902.31	5247.12	6481.88	14342.2	17480.6	22601.1	19677.4	0.0160781	0.0085822	0.0019233	0.178669	0.0036938	0.0004971
Glycerolipid	TAG	56:10	18:2	18:3	20:5	TAG 18:2-18:3-20:5	C59H94O6	AAFWHBKWHROFLW-KFODQXHWNA-N	CCCCC\C=C/C=C\CCCCCCCCC(=O)OCC(COC(=O)CCC\C=C/C\C=C/C\C=C/C\C=C/C\C=C/CC)OC(=O)CCCCCCCCC\C=C/C=C\C=C/CC	13.7279	916.735	[M+NH4]+	924	81.06447:20 93.07177:20 103.05261:10 109.09843:20 115.05916:10 131.07823:20 133.10191:20 135.11484:31 143.09309:10 145.10004:31 157.11145:10 161.13182:20 167.14542:10 171.12154:10 173.12807:31 178.94968:20 183.11455:31 186.98955:20 187.13428:20 189.15468:20 197.13078:10 201.1606:61 205.16447:10 207.17818:20 231.20334:10 237.22314:20 263.22852:20 265.24445:10 267.20352:51 268.9985:31 283.20428:10 …	FALSE	FALSE	FALSE	TRUE	FALSE	TRUE	93.875	44.1875	36.9375	115.75	189.688	243	180.062	605.812	1026.94	2397.31	1811.5	2364.88	1186.94	1456.12	1406.75	1618.94	0.104117	0.0105559	0.0004154	0.0031748	0.0001722	0.196881
Glycerolipid	TAG	58:11	18:2	18:3	22:6	TAG 18:2-18:3-22:6	C61H96O6	XCBYXQXFYDAELV-YZKABGTANA-N	CCCCC\C=C/C=C\CCCCCCCCC(=O)OCC(COC(=O)CC\C=C/C\C=C/C\C=C/C\C=C/C\C=C/C\C=C/CC)OC(=O)CCCCCCCCC\C=C/C=C\C=C/CC	13.8139	942.755	[M+NH4]+	2304	79.0537:41 81.06976:112 91.05357:41 93.06924:51 95.08497:71 106.07232:10 107.08609:61 109.09713:61 117.08095:10 119.08015:31 121.10248:71 123.11053:31 131.0816:51 133.10042:82 135.11989:61 147.11766:41 149.1353:41 155.08438:10 159.11449:51 161.13548:41 163.14761:41 169.10477:20 171.11421:41 173.12997:51 175.14445:82 177.16496:31 179.15173:20 185.13434:61 187.14395:41 197.13078:41 199.11272:31 201…	FALSE	FALSE	FALSE	FALSE	TRUE	TRUE	173.062	87.5625	134.062	322.188	522.062	609	685.875	1411.06	2237.38	5101.06	2660.81	4248.94	3866.44	4060.19	5673.12	5074.56	0.0503969	0.0147736	0.0016581	0.0077423	0.0001823	0.213648
Glycerolipid	TAG	58:12	18:2	20:5	20:5	TAG 18:2-20:5-20:5	C61H94O6	OSBHUMCTAPXRIE-HZSFKAAMNA-N	CCCCC\C=C/C=C\CCCCCCCCC(=O)OCC(COC(=O)CCC\C=C/C\C=C/C\C=C/C\C=C/C\C=C/CC)OC(=O)CCC\C=C/C\C=C/C\C=C/C\C=C/C\C=C/CC	13.6635	940.738	[M+NH4]+	1832	77.03979:20 79.05274:51 81.07005:112 91.05658:82 93.06956:71 93.46607:10 95.08529:71 100.16473:10 105.0724:51 107.08789:61 109.1019:41 117.06451:51 117.07367:61 119.08512:112 121.10129:71 123.11872:61 129.07057:41 129.08501:10 131.08682:163 131.11105:10 133.10242:61 135.11864:71 143.08516:41 145.10056:92 147.12148:31 149.12881:31 155.14102:10 157.10133:51 159.1149:92 161.12874:71 163.15164:31 169…	FALSE	FALSE	FALSE	TRUE	FALSE	TRUE	11.25	16.25	16.5	35.1875	29.5	19.5625	51.0625	140.438	4917.88	8745.31	4018.19	7726.81	877	872.125	785.188	1047	0.240145	0.011023	0.0004869	0.0111957	9.7e-06	0.0164975
Glycerolipid	TAG	60:13	18:2	20:5	22:6	TAG 18:2-20:5-22:6	C63H96O6	BJXQMCNNNOSANE-DQJAMYFDNA-N	CCCCC\C=C/C=C\CCCCCCCCC(=O)OCC(COC(=O)CC\C=C/C\C=C/C\C=C/C\C=C/C\C=C/C\C=C/CC)OC(=O)CCC\C=C/C\C=C/C\C=C/C\C=C/C\C=C/CC	13.7619	966.752	[M+NH4]+	1921	79.05209:41 81.07066:82 83.08511:31 85.10084:10 91.05455:71 93.0648:31 95.08186:71 97.10107:20 105.06735:41 106.03709:10 117.06532:31 117.08517:10 119.07979:31 121.10057:41 129.06825:31 131.08287:41 133.10007:61 135.11627:51 137.13275:31 143.08275:31 145.09473:20 145.10323:31 147.11389:31 149.13324:51 154.07716:10 157.10591:10 159.11594:51 161.12621:41 163.14189:41 169.09344:20 169.09712:51 171.1…	FALSE	FALSE	FALSE	TRUE	TRUE	TRUE	55.5625	6.75	13.5625	43.125	100.312	41.1875	85.9375	156.875	1840.81	3509.19	2200	3202.81	4542.5	4934.94	5123.5	4872.69	0.0467083	0.006786	2.99e-05	0.0071993	2.01e-05	0.0019234
Glycerolipid	TAG	62:13	18:2	22:5	22:6	TAG 18:2-22:5-22:6	C65H100O6	OYMKSBAAXXGCJH-KXOCGYBNNA-N	CCCCC\C=C/C=C\CCCCCCCCC(=O)OCC(COC(=O)CC\C=C/C\C=C/C\C=C/C\C=C/C\C=C/C\C=C/CC)OC(=O)CCCCC\C=C/C\C=C/C\C=C/C\C=C/C\C=C/CC	13.939	994.785	[M+NH4]+	1363	81.07384:20 97.06561:10 121.10596:20 145.0955:10 151.15327:10 159.11852:31 168.0556:10 173.12677:20 175.15057:31 183.13803:10 198.09726:10 211.14748:10 217.66316:10 227.17981:10 263.23367:31 291.24124:10 311.23767:31 313.2496:31 335.25299:10 337.27362:41 638.51849:10 647.49487:92 648.48969:20 649.5105:209 651.55804:20 664.49298:10 672.51837:10 675.5257:20 697.50952:51 903.7113:10 912.7041:31 959.…	FALSE	FALSE	FALSE	FALSE	TRUE	TRUE	22.0625	22.25	6	101.938	147.938	100.438	152.5	274.062	744.062	1425.75	916.875	1101.56	3231.75	3272.94	5952.94	4339.81	0.0225962	0.0055525	0.0072931	0.0070949	0.0079056	0.0135493
Glycerolipid	TAG	62:14	18:2	22:6	22:6	TAG 18:2-22:6-22:6	C65H98O6	YUWQRJUAJXYGHW-RZACPUGRNA-N	CCCCC\C=C/C=C\CCCCCCCCC(=O)OCC(COC(=O)CC\C=C/C\C=C/C\C=C/C\C=C/C\C=C/C\C=C/CC)OC(=O)CC\C=C/C\C=C/C\C=C/C\C=C/C\C=C/C\C=C/CC	13.8606	992.763	[M+NH4]+	4513	71.08878:10 77.03473:31 79.05515:102 81.06867:163 83.08566:31 85.10661:10 91.05377:143 93.06945:143 95.08656:122 105.06795:102 107.08632:102 109.10179:92 116.05754:10 117.06746:82 119.08501:153 121.09808:102 123.11705:82 129.06245:31 131.07541:31 131.08833:163 133.10394:112 135.11525:92 137.13834:41 141.07036:61 143.08844:82 145.10216:92 147.11795:82 149.13216:51 155.08118:41 157.09772:143 159.11…	FALSE	FALSE	FALSE	FALSE	TRUE	TRUE	91.875	19.0625	40.375	59.875	315.5	142.25	159.812	307.438	397.062	598.938	319.375	540.375	16983.6	13620.9	23050.2	15555	0.0107976	0.0059987	0.0034513	0.0260778	0.0035471	0.0036809
Glycerolipid	TAG	66:18	22:6	22:6	22:6	TAG 22:6-22:6-22:6	C69H98O6	SOFMPBOQLPVEQZ-LBUXZKOBSA-N	CC\C=C/C\C=C/C\C=C/C\C=C/C\C=C/C\C=C/CCC(=O)OCC(COC(=O)CC\C=C/C\C=C/C\C=C/C\C=C/C\C=C/C\C=C/CC)OC(=O)CC\C=C/C\C=C/C\C=C/C\C=C/C\C=C/C\C=C/CC	13.7481	1040.77	[M+NH4]+	244	79.05489:10 85.06342:10 91.06297:10 107.08318:31 119.0879:10 142.08081:10 155.08456:10 167.08188:10 171.1163:20 175.15591:20 181.10999:10 183.12823:20 193.10287:10 201.16895:20 209.13065:10 215.18883:10 225.18082:10 231.14796:10 265.19437:10 293.23102:51 305.18896:10 311.23764:31 383.25223:10 385.2684:31 695.51086:282 696.51215:31 925.72668:20 965.13269:10 987.6828:20 1023.78986:10 1040.76611:92	FALSE	FALSE	FALSE	FALSE	TRUE	TRUE	0	0	0	9.375	6.5	0	0	9	7.75	37.625	11.625	14.1875	846.312	612.875	1155.81	1199.12	0.657087	0.0735263	0.0062573	0.0983461	0.0062866	0.0064899

## Sheet: Plasma
																					Mouse_Plasma_WT_N_F1	Mouse_Plasma_WT_N_F1	Mouse_Plasma_WT_N_F1	Mouse_Plasma_WT_N_F1	Mouse_Plasma_WT_N_F1	Mouse_Plasma_WT_N_F1AA	Mouse_Plasma_WT_N_F1AA	Mouse_Plasma_WT_N_F1AA	Mouse_Plasma_WT_N_F1AA	Mouse_Plasma_WT_N_F1AA	Mouse_Plasma_WT_N_F1EPA	Mouse_Plasma_WT_N_F1EPA	Mouse_Plasma_WT_N_F1EPA	Mouse_Plasma_WT_N_F1EPA	Mouse_Plasma_WT_N_F1EPA	Mouse_Plasma_WT_N_F1DHA	Mouse_Plasma_WT_N_F1DHA	Mouse_Plasma_WT_N_F1DHA	Mouse_Plasma_WT_N_F1DHA	Mouse_Plasma_WT_N_F1DHA
Lipid super class	Lipid class	Total chain	SN1 chain	SN2 chain	SN3 chain	Name	Formula	Representative InChIKey	Representative SMILES	RT[min]	m/z	Adduct	Average intensity	MSMS	Saturated	Mono unsaturated	Arachidonic acid	Eicosapentaenoic acid	Docosapentaenoic acid	PUFAs	160819_Plasma_Normal_Neg_01	160819_Plasma_Normal_Neg_02	160819_Plasma_Normal_Neg_03	160819_Plasma_Normal_Neg_04	160819_Plasma_Normal_Neg_05	160819_Plasma_AA_Neg_16	160819_Plasma_AA_Neg_17	160819_Plasma_AA_Neg_18	160819_Plasma_AA_Neg_19	160819_Plasma_AA_Neg_20	160819_Plasma_EPA_Neg_06	160819_Plasma_EPA_Neg_07	160819_Plasma_EPA_Neg_08	160819_Plasma_EPA_Neg_09	160819_Plasma_EPA_Neg_10	160819_Plasma_DHA_Neg_11	160819_Plasma_DHA_Neg_12	160819_Plasma_DHA_Neg_13	160819_Plasma_DHA_Neg_14	160819_Plasma_DHA_Neg_15	Q-values (Control vs ARA)	Q-values (Control vs EPA)	Q-values (Control vs DHA)	Q-values (ARA vs EPA)	Q-values (ARA vs DHA)	Q-values (EPA vs DHA)
Acyl carnitine	ACar	16:0	16:0			ACar 16:0	C23H46NO4	XOMRRQXKHMYMOC-UHFFFAOYNA-O	CCCCCCCCCCCCCCCC(=O)OC(CC(O)=O)C[N+](C)(C)C	6.0681	400.341	[M]+	1446	81.06697:10 85.02805:41 93.06612:20 109.09505:10 121.0722:10 163.03812:10 400.3078:20	TRUE	FALSE	FALSE	FALSE	FALSE	FALSE	1667.69	1332.44	883.188	1395.75	1370.56	1612.75	1023.38	1239.25	1280.19	1470.25	1336.56	1758.81	2047.69	1580.56	1987.81	1926.31	1182.25	1140.38	1418.75	1263.06	0.977246	0.0534946	0.775967	0.0359182	0.736808	0.104074
Acyl carnitine	ACar	18:1	18:1			ACar 18:1	C25H48NO4	HOAMADDCQBUDDY-KHPPLWFENA-O	CCCCCC\C=C/CCCCCCCCCC(=O)OC(CC(O)=O)C[N+](C)(C)C	6.21602	426.356	[M]+	805	81.07151:10 85.0275:102 128.95667:10 426.3559:31	FALSE	TRUE	FALSE	FALSE	FALSE	FALSE	1401.69	682.75	913.562	959.875	1328.25	791	499.188	831.188	710.062	590.312	926	807.375	949.562	848.312	700.625	926.625	702.062	467.062	584.188	481.188	0.0360177	0.175372	0.0283233	0.0665035	0.633074	0.0559055
Cholesterol ester	CE	16:0	16:0			CE 16:0	C43H76O2	BBJQPKLGPMQWBU-JADYGXMDSA-N	CCCCCCCCCCCCCCCC(=O)O[C@H]1CC[C@]2(C)[C@H]3CC[C@]4(C)[C@H](CC[C@H]4[C@@H]3CC=C2C1)[C@H](C)CCCC(C)C	14.8357	642.614	[M+NH4]+	3292	81.07288:10 93.06566:20 95.0827:41 107.08647:10 125.14636:10 128.9534:31 135.11838:41 147.11424:41 151.14064:10 161.13356:41 175.1535:51 187.14931:20 203.1781:31 207.21405:20 226.99117:31 231.21518:10 241.20659:10 257.22766:31 259.25006:41 290.96191:10 326.30746:10 334.97086:21 369.35083:374	TRUE	FALSE	FALSE	FALSE	FALSE	FALSE	3241.94	4271.88	3518.69	4820.5	4277.19	3040.56	2225.75	3061.19	2771.06	3705.25	2854.31	2819	3502.06	2860.56	4471.19	2874.25	3076.25	2388.81	2574.25	3490.19	0.0211365	0.128854	0.010458	0.417948	0.801353	0.291975
Cholesterol ester	CE	16:1	16:1			CE 16:1	C43H74O2	HODJWNWCVNUPAQ-XDOSKZMUSA-N	CCCCCC\C=C/CCCCCCCC(=O)O[C@H]1CC[C@]2(C)[C@H]3CC[C@]4(C)[C@H](CC[C@H]4[C@@H]3CC=C2C1)[C@H](C)CCCC(C)C	14.4472	640.604	[M+NH4]+	11790	79.0505:10 83.086:41 93.06833:31 95.0799:20 95.08402:41 105.06805:31 109.09448:20 109.10184:61 111.11526:20 119.08804:31 123.11538:82 133.1021:31 135.11501:71 139.15784:10 147.11926:102 149.13173:51 161.13164:102 175.14775:61 177.16826:31 185.13185:10 186.99091:51 189.16379:61 193.20189:20 201.15782:41 203.17792:31 205.20003:31 207.50642:10 215.18332:51 219.20042:31 219.20877:31 226.98457:82 229.…	FALSE	TRUE	FALSE	FALSE	FALSE	FALSE	20131	15413.2	21665.6	25452.5	23306.8	7683.38	5603.44	6178.12	6374.06	9849.5	9367.19	10392.3	15687.8	10562.3	11657.4	6029.31	8156.12	6247.88	6867.12	9179	6.46e-05	0.001385	5.55e-05	0.0110365	0.874048	0.0096024
Cholesterol ester	CE	18:1	18:1			CE 18:1	C45H78O2	RJECHNNFRHZQKU-RMUVNZEASA-N	CCCCCCCC\C=C/CCCCCCCC(=O)O[C@H]1CC[C@]2(C)[C@H]3CC[C@]4(C)[C@H](CC[C@H]4[C@@H]3CC=C2C1)[C@H](C)CCCC(C)C	14.8706	668.633	[M+NH4]+	28062	79.06184:10 81.06908:41 93.06837:31 95.08681:102 95.10332:10 97.09633:41 105.08111:10 109.09451:20 109.09894:82 111.11678:31 119.08345:31 121.10889:20 123.1201:51 125.1321:41 133.09396:20 133.10048:71 135.11665:153 137.13147:31 147.11755:204 149.13173:71 151.15092:41 161.13342:214 163.15092:41 165.15921:41 173.13326:20 175.14587:143 177.83177:10 179.17577:41 187.14333:51 189.16182:82 190.08466:10…	FALSE	TRUE	FALSE	FALSE	FALSE	FALSE	35326	44235.9	37176.4	59223.2	60491.1	19346.8	16374.2	18556.4	19252.6	23946.8	26608.5	20908.1	31297.8	28760.7	25587.2	16447.9	22491.5	19357.8	16609.4	19245.9	0.0054412	0.0062539	0.005138	0.0100518	0.698929	0.0052892
Cholesterol ester	CE	18:2	18:2			CE 18:2	C45H76O2	NAACPBBQTFFYQB-LJAITQKLSA-N	CCCCC\C=C/C\C=C/CCCCCCCC(=O)O[C@H]1CC[C@]2(C)[C@H]3CC[C@]4(C)[C@H](CC[C@H]4[C@@H]3CC=C2C1)[C@H](C)CCCC(C)C	14.5378	666.616	[M+NH4]+	222236	71.08592:153 79.05203:133 80.82558:21 81.06931:418 83.08499:294 85.0981:133 89.30189:10 91.05567:122 93.07134:173 95.08707:676 97.09936:298 105.06836:196 107.08525:251 109.10216:646 111.11558:238 119.08528:218 121.09987:351 123.1157:323 125.12923:112 127.14638:61 131.082:82 133.09917:274 135.11533:845 137.13013:153 139.14653:61 145.09702:71 147.11447:1174 149.13379:504 151.1478:204 159.11281:173 …	FALSE	FALSE	FALSE	FALSE	FALSE	TRUE	264227	232582	285071	344470	375014	121927	104681	105107	126734	110986	240601	177311	251800	185474	261086	252748	237385	207743	259978	299798	0.0017376	0.0398314	0.144535	0.0024693	0.0004329	0.254371
Cholesterol ester	CE	18:3	18:3			CE 18:3	C45H74O2	FYMCIBHUFSIWCE-WVXFKAQASA-N	CC\C=C/C\C=C/C\C=C/CCCCCCCC(=O)O[C@H]1CC[C@]2(C)[C@H]3CC[C@]4(C)[C@H](CC[C@H]4[C@@H]3CC=C2C1)[C@H](C)CCCC(C)C	14.2697	664.6	[M+NH4]+	9846	79.05393:31 81.06489:61 83.08567:102 89.05612:31 91.05775:20 93.06801:61 95.08646:143 97.09597:20 97.10014:51 103.04998:20 107.08318:31 109.1045:122 119.08006:20 121.10238:133 123.11824:71 123.47229:10 133.09857:41 135.11639:173 137.1312:61 147.11903:238 149.13322:92 159.11937:51 161.13144:319 163.14893:71 165.15541:31 167.11031:10 173.12939:51 175.14758:163 177.15871:61 179.17941:61 187.14902:51…	FALSE	FALSE	FALSE	FALSE	FALSE	TRUE	12439.3	13447.8	13658.4	22968.6	21228.3	9093.75	8909.44	6412.94	10849.7	10199.5	7225.06	6287.06	8644.69	6918.81	8424.25	7277.31	6167.69	5320.69	5215.69	6227.06	0.0112756	0.0126318	0.0076734	0.108683	0.0069027	0.0371868
Cholesterol ester	CE	20:3	20:3			CE 20:3	C47H78O2	MLPRJPSMAFZPLA-BBFGHUFCSA-N	CCCCC\C=C/C\C=C/C\C=C/CCCCCCC(=O)O[C@H]1CC[C@]2(C)[C@H]3CC[C@]4(C)[C@H](CC[C@H]4[C@@H]3CC=C2C1)[C@H](C)CCCC(C)C	14.6285	692.631	[M+NH4]+	6408	79.0495:15 79.05702:5 81.0693:76 83.07985:10 83.085:36 95.0844:102 97.09807:41 105.06851:41 107.08542:41 109.0994:112 119.084:36 121.09859:56 123.1066:10 123.11599:36 124.11836:5 131.09851:5 133.0979:46 135.11571:107 147.11665:148 149.1291:61 151.15004:31 159.11871:31 161.13078:260 163.14647:46 165.1602:41 175.14882:194 177.16182:36 179.16745:10 179.1769:61 185.13493:5 187.14261:46 189.1611:97 19…	FALSE	FALSE	FALSE	FALSE	FALSE	TRUE	13800.1	10559.3	14562.8	15788.1	21196.9	6077.44	5546.5	580.375	383.125	4860.19	3644.38	3518.75	4588.31	2272	3097.44	3223	3742.75	2601.19	3744.44	4375.81	0.0005893	0.0019502	0.0022103	0.961942	0.971723	0.819433
Cholesterol ester	CE	20:4	20:4			CE 20:4	C47H76O2	IMXSFYNMSOULQS-BEDFLICRSA-N	CCCCC\C=C/C\C=C/C\C=C/C\C=C/CCCC(=O)O[C@H]1CC[C@]2(C)[C@H]3CC[C@]4(C)[C@H](CC[C@H]4[C@@H]3CC=C2C1)[C@H](C)CCCC(C)C	14.4017	690.617	[M+NH4]+	273873	71.08393:346 77.03336:21 79.05373:206 81.0685:851 83.08675:507 85.10119:293 91.04813:21 91.05217:268 93.06917:357 95.08488:1179 97.09995:551 105.069:504 107.08445:494 109.09988:1576 111.11478:350 119.08603:357 121.10064:709 123.11649:638 125.13477:289 127.1456:103 131.08607:71 133.10002:692 135.11621:1809 137.13103:359 139.14577:82 145.09967:143 147.11714:2799 149.13478:989 151.14706:360 153.1623…	FALSE	FALSE	TRUE	FALSE	FALSE	TRUE	178081	215477	254350	346810	384846	666637	666485	740362	686891	712669	85797.3	65427.5	94619.1	87672.3	83265.5	39511.9	42393.8	34264.8	41985.2	49917.1	8.1e-06	0.0075133	0.0038287	0	7e-07	6.22e-05
Cholesterol ester	CE	20:5	20:5			CE 20:5	C47H74O2	XZFUGMCJZFRBKF-BDJFIEMMSA-N	CC\C=C/C\C=C/C\C=C/C\C=C/C\C=C/CCCC(=O)O[C@H]1CC[C@]2(C)[C@H]3CC[C@]4(C)[C@H](CC[C@H]4[C@@H]3CC=C2C1)[C@H](C)CCCC(C)C	14.1521	688.601	[M+NH4]+	97361	71.08499:250 79.05357:214 81.0696:614 83.0853:415 85.10101:204 89.05972:21 91.05196:185 93.06896:348 95.08604:954 97.1011:457 105.07163:362 107.07688:22 107.08272:379 109.09961:976 111.11598:352 119.08263:251 121.10187:574 123.11615:663 125.13285:256 127.14365:71 133.10127:526 135.11583:1292 137.13228:219 139.14703:92 145.09924:92 147.11842:1970 149.13434:788 151.14488:293 159.11694:289 161.13078…	FALSE	FALSE	FALSE	TRUE	FALSE	TRUE	11708.5	11576.6	13582.6	19134.2	15924.1	2759.94	2054.06	2402.19	1974.38	2391.25	287954	267539	403545	294802	296918	57856.9	64752.4	48481.4	69150.7	72714.4	0.0010217	0.0002375	5.4e-06	0.0002103	0.0001508	0.0003779
Cholesterol ester	CE	22:5	22:5			CE 22:5	C49H78O2	XOLZNHXNFMEUGA-DCDLNIKOSA-N	CC\C=C/C\C=C/C\C=C/C\C=C/C\C=C/CCCCCC(=O)O[C@H]1CC[C@]2(C)[C@H]3CC[C@]4(C)[C@H](CC[C@H]4[C@@H]3CC=C2C1)[C@H](C)CCCC(C)C	14.4412	716.633	[M+NH4]+	3568	81.06829:61 95.07638:20 95.08325:41 95.09289:10 105.06872:31 107.08854:41 109.09811:51 111.11448:51 119.08263:31 121.09875:31 133.09804:51 135.1142:71 147.10818:20 147.11674:112 149.12747:41 159.11165:31 161.1344:133 163.15012:31 165.1584:41 173.13246:41 175.1488:143 179.17876:41 187.15221:41 189.16492:61 193.19324:41 201.16302:61 203.17511:61 205.19113:31 215.18253:102 217.19267:51 219.21216:82 …	FALSE	FALSE	FALSE	FALSE	FALSE	TRUE	1766.12	1629.44	1388.69	1071.94	2168.19	2098	1945.12	2003.31	2604.75	3261.5	8830.06	8040.94	12812.9	8357.44	11294.4	474.688	436.375	169.938	395.125	607.875	0.0361083	0.0006858	0.0003127	0.0008539	0.0008606	0.0005096
Cholesterol ester	CE	22:6	22:6			CE 22:6	C49H76O2	VOEVEGPMRIYYKC-HNJOWPRISA-N	CC\C=C/C\C=C/C\C=C/C\C=C/C\C=C/C\C=C/CCC(=O)O[C@H]1CC[C@]2(C)[C@H]3CC[C@]4(C)[C@H](CC[C@H]4[C@@H]3CC=C2C1)[C@H](C)CCCC(C)C	14.3078	714.617	[M+NH4]+	68165	71.08737:122 81.06324:11 81.06832:266 83.08528:194 85.10229:133 85.63285:10 93.06757:92 95.08601:331 97.0983:112 105.07014:102 107.08414:245 109.10104:371 111.11593:166 119.08874:143 121.10025:188 123.11765:173 125.13278:82 133.09795:185 135.11411:489 137.13385:143 139.14362:61 145.10254:73 147.11833:853 149.13423:358 151.14824:112 159.10971:31 159.11684:102 161.13245:1227 163.15175:194 165.16187…	FALSE	FALSE	FALSE	FALSE	TRUE	TRUE	44218.8	52443.1	53355	62891.1	68291.1	36246.2	30226.3	33378.4	39053.8	35193.7	61096.9	54818.8	69076.4	65520.6	64224.7	102036	110895	99962.1	124666	155711	0.0013735	0.204713	0.0004887	8.6e-06	0.0010578	0.0045311
Ceramide	Cer-NS	d30:1	d18:1	12:0		Cer-NS d18:1/12:0	C30H59NO3	HXFPPRPLRSPNIB-WJTDDFOZNA-N	CCCCCCCCCCCCC\C=C\C(O)C(CO)NC(=O)CCCCCCCCCCC	8.45561	540.462	[M+Hac-H]-	27515	80.02393:10 95.04917:20 169.15186:10 179.14246:31 181.1423:26 181.15561:761 183.17236:20 197.18791:168 198.18581:637 199.16829:419 212.2049:31 222.192:20 224.20093:3321 225.21831:20 235.20274:31 236.47903:21 237.22169:926 238.18106:41 239.18819:25 239.23837:56 240.19305:402 250.2527:61 254.20564:15 255.22577:15 263.23822:636 266.25034:173 268.26178:143 281.24844:20 296.31979:5 298.27582:66 405.40…	TRUE	FALSE	FALSE	FALSE	FALSE	FALSE	23178.8	21014.2	24274.4	23169.8	27569.6	29681.6	22736.2	27432.3	31855.4	28597.8	26459.8	25730.2	32561.9	32768.1	34173.5	28811.7	28480.8	25758.2	26491.7	29544.4	0.052799	0.01349	0.0151698	0.355425	0.888444	0.221249
Ceramide	Cer-NS	d40:1	d18:1	22:0		Cer-NS d18:1/22:0	C40H79NO3	KEPQASGDXIEOIL-LAPDZXRHNA-N	CCCCCCCCCCCCCCCCCCCCCC(=O)NC(CO)C(O)\C=C\CCCCCCCCCCCCC	13.0854	680.616	[M+Hac-H]-	4386	237.2226:194 250.24693:20 255.24249:10 263.24146:184 266.25128:51 268.26044:51 287.01465:10 298.26712:31 321.31235:236 338.33899:245 339.32596:153 364.35428:887 378.37616:20 380.3494:173 572.56696:153 588.57629:143 590.56683:93 590.57031:206 620.58923:1491	TRUE	FALSE	FALSE	FALSE	FALSE	FALSE	3015	5109.69	2709.69	5985.31	5474.38	4909.5	4459.94	4585.38	4649.44	4700.81	3175.94	2739.5	4405.88	4722	6597.12	3736.81	4829.88	4692	3575	3643.56	0.778231	0.894069	0.628375	0.649873	0.107889	0.758148
Ceramide	Cer-NS	d41:1	d18:1	23:0		Cer-NS d18:1/23:0	C41H81NO3	NAJHAHQNQCNWOP-JMUUFCRMNA-N	CCCCCCCCCCCCCCCCCCCCCCC(=O)NC(CO)C(O)\C=C\CCCCCCCCCCCCC	13.2058	694.632	[M+Hac-H]-	1767	237.22322:163 263.23752:92 268.25644:20 334.04501:10 335.33051:133 352.36484:102 353.34818:82 367.35605:31 378.36856:311 392.37827:61 394.3652:61 584.71844:10 586.58624:71 586.65118:10 602.56738:41 602.5882:71 604.59534:122 632.61975:21 634.61578:903	TRUE	FALSE	FALSE	FALSE	FALSE	FALSE	1536.12	2883.12	1387.81	2999.62	2145.88	1742.56	1256.31	1128.06	2102.5	2102.5	1309.19	1205.31	1884.06	1697.88	1579.44	1435.19	1925.81	1458.5	1807.44	1744.38	0.216599	0.102009	0.200089	0.599824	0.973217	0.404541
Ceramide	Cer-NS	d42:1	d18:1	24:0		Cer-NS d18:1/24:0	C42H83NO3	ZJVVOYPTFQEGPH-MHAUTQJVNA-N	CCCCCCCCCCCCCCCCCCCCCCCC(=O)NC(CO)C(O)\C=C\CCCCCCCCCCCCC	13.3122	708.648	[M+Hac-H]-	5573	141.00926:7 141.01764:17 209.20078:3 217.00288:27 225.22092:10 235.20538:14 237.21783:353 239.23448:24 249.2319:3 250.2487:31 263.23865:339 266.24847:61 267.21402:3 268.26453:68 281.23941:10 296.2789:3 298.27377:34 299.00043:10 349.34509:459 365.37213:48 366.37076:362 367.35449:264 380.3952:17 381.00363:10 390.36124:14 391.16452:15 392.39059:1754 393.33026:11 402.806:3 406.37067:17 408.38416:281 …	TRUE	FALSE	FALSE	FALSE	FALSE	FALSE	3115.44	10666.9	3699	8399.25	6730.69	6026	5506.44	4686.25	4858.56	5016.31	4622.94	4145.94	4895.75	6158.06	7254.69	4970.25	5719.44	5664.06	4241	5085.19	0.414064	0.489815	0.38836	0.758258	0.825565	0.668215
Ceramide	Cer-NS	d42:2	d18:1	24:1		Cer-NS d18:1/24:1	C42H81NO3	FUWLDBVRSLAFFJ-DBOQMASJNA-N	CCCCCCCCCCCCC\C=C\C(O)C(CO)NC(=O)CCCCCCCCC\C=C/CCCCCCCCCCCC	13.0901	706.632	[M+Hac-H]-	3671	235.20546:41 237.22226:403 253.25098:10 263.23416:349 266.25317:61 268.25769:61 347.33066:425 363.36038:31 364.35892:267 365.34534:282 378.37537:32 389.14691:31 390.37259:1552 392.388:32 396.55237:10 406.36804:204 572.57904:31 598.59564:224 612.59229:10 614.58801:238 616.60101:331 628.51459:92 628.59949:31 646.51978:92 646.60944:3512 647.62524:31 706.63318:31	FALSE	TRUE	FALSE	FALSE	FALSE	FALSE	3508.06	9884.06	4077.81	5932.5	6156.38	3598.06	2018.19	2809.62	2464.31	3199.44	2977.38	2777.38	3624.69	3553.62	2476.62	2873.62	3539.56	2612.69	3027.44	2300	0.0485781	0.0634057	0.0517569	0.477103	0.882355	0.507087
Ceramide	Cer-NS	d43:1	d18:1	25:0		Cer-NS d18:1/25:0	C43H85NO3	QHPYSHVSWAOLHS-BSKJHSHCNA-N	CCCCCCCCCCCCCCCCCCCCCCCCC(=O)NC(CO)C(O)\C=C\CCCCCCCCCCCCC	13.4248	722.664	[M+Hac-H]-	30101	80.03045:15 93.00537:5 219.20609:15 225.22581:20 235.20613:51 236.47594:11 237.22076:1824 239.23744:92 250.25182:102 251.23044:15 255.2294:31 262.263:16 263.23734:1456 266.24948:261 268.26324:275 278.24808:25 280.26648:15 281.24765:51 298.27264:112 363.31903:25 363.36206:2254 364.35526:15 365.37402:15 379.39066:178 380.38898:1731 381.37482:1316 394.39374:31 404.38998:56 405.11954:25 406.40424:770…	TRUE	FALSE	FALSE	FALSE	FALSE	FALSE	27653.5	27163.1	28464.7	30093.4	34110.7	27011.6	26495.4	29325.6	36677.4	32992.8	26630.3	27439.6	29358.8	33521.6	31978.4	31675.6	25656.3	30762	30571.2	34429	0.673737	0.877642	0.570263	0.766616	0.961744	0.677777
Glycerolipid	DAG	34:1	16:0	18:1		DAG 16:0-18:1	C37H70O5	YEJYLHKQOBOSCP-ZCXUNETKNA-N	CCCCCCCCCCCCCCCC(=O)OCC(CO)OC(=O)CCCCCCC\C=C/CCCCCCCC	12.065	612.555	[M+NH4]+	769	71.08384:9 76.99983:2 79.0574:1 81.06714:3 83.08538:6 85.0985:4 93.06635:2 95.08479:3 97.10263:4 107.08873:1 109.09831:4 117.09586:1 121.09898:4 123.11639:2 128.94955:4 128.95596:9 133.09016:1 135.11938:5 143.06056:1 149.13812:2 165.1624:2 177.10963:2 184.98177:1 187.00018:4 195.17743:2 203.09917:1 225.03931:2 226.98433:9 234.91946:2 239.0941:2 239.23375:4 247.2408:3 257.24088:2 265.24948:7 268.9…	TRUE	TRUE	FALSE	FALSE	FALSE	FALSE	981.938	1106.56	631.375	1150.69	1301.25	683.188	701.75	362.938	657.438	644.5	624	495.125	680.562	816.625	1074.5	753.75	729.312	747.25	655.812	571.5	0.0110685	0.0836852	0.0358539	0.304402	0.287188	0.667487
Glycerolipid	DAG	34:2	16:0	18:2		DAG 16:0-18:2	C37H68O5	SVXWJFFKLMLOHO-BCTRXSSUNA-N	CCCCCCCCCCCCCCCC(=O)OCC(CO)OC(=O)CCCCCCC\C=C/C\C=C/CCCCC	11.0528	610.539	[M+NH4]+	1364	81.07091:20 95.08337:20 97.06783:10 111.12803:10 123.11791:20 149.04333:10 193.15836:10 256.74554:10 299.06259:20 313.27402:102 324.90964:10 337.28064:71 341.09512:10 344.98346:20 575.50122:61 605.55347:10	TRUE	FALSE	FALSE	FALSE	FALSE	TRUE	1039.88	1861.62	982.438	2013.94	2127.69	1262.62	1277.44	884.25	1213.06	1114.81	1034.56	785.688	1493.88	1487.62	2423.88	1423.75	1391.81	1138.88	1288.38	1033.19	0.140661	0.679093	0.23515	0.359166	0.342674	0.543449
Glycerolipid	DAG	36:2	18:1	18:1		DAG 18:1-18:1	C39H72O5	AFSHUZFNMVJNKX-CLFAGFIQNA-N	CCCCCCCC\C=C/CCCCCCCC(=O)OCC(CO)OC(=O)CCCCCCC\C=C/CCCCCCCC	12.2786	638.568	[M+NH4]+	516	71.09232:1 79.05882:1 81.06731:5 83.08556:4 93.06791:4 95.08498:4 97.09866:4 109.09412:2 109.10591:6 111.11194:3 121.10079:4 125.12704:2 128.95624:8 135.11147:4 149.1281:2 149.13498:3 163.1436:3 165.16455:2 179.14932:1 203.17599:1 205.19002:2 208.93573:3 226.99118:2 234.91347:2 247.23466:5 265.25232:6 269.0087:1 274.89981:3 288.9346:2 295.79297:1 314.90994:3 339.28983:110 340.88739:2 354.88644:4 …	FALSE	TRUE	FALSE	FALSE	FALSE	FALSE	897.688	1114.88	698.188	1012	1292.56	354.438	500.875	200.875	298	433.75	346.25	307.5	356	374.938	638.438	345.25	340.5	267.062	240.938	293.875	0.0004453	0.0008861	0.0017145	0.568611	0.314758	0.126814
Glycerolipid	DAG	36:3	18:1	18:2		DAG 18:1-18:2	C39H70O5	BLZVZPYMHLXLHG-RQOIEFAZNA-N	CCCCCCCC\C=C/CCCCCCCC(=O)OCC(CO)OC(=O)CCCCCCC\C=C/C\C=C/CCCCC	11.2196	636.554	[M+NH4]+	1373	93.07613:10 95.08504:20 97.09871:10 128.9563:20 241.1958:10 325.28433:10 337.27365:102 339.27173:31 339.29251:112 583.50433:10 601.50287:71 601.51672:71 619.52899:20	FALSE	TRUE	FALSE	FALSE	FALSE	TRUE	2007.25	2378.31	1124.5	1977.62	2906.31	1254.44	1501.81	602	1008.5	1120.31	1203.19	816.562	1215.12	1274.19	2132.44	1020.56	1074.44	1000.38	829.75	1017.31	0.017114	0.0727342	0.0193873	0.405361	0.514404	0.19371
Glycerolipid	DAG	38:5	18:1	20:4		DAG 18:1-20:4	C41H70O5	CDIDDLXSXXDECX-HAGCXRLMNA-N	CCCCCCCC\C=C/CCCCCCCC(=O)OCC(CO)OC(=O)CCCCCC\C=C/C\C=C/C\C=C/C\C=C/CC	11.0764	660.555	[M+NH4]+	382	79.05419:3 81.06516:2 83.08208:5 89.05772:4 91.05128:5 93.06419:2 93.06964:4 95.0826:6 97.09763:2 105.07091:4 107.08637:5 109.0974:2 117.07199:2 119.08649:4 121.10265:3 127.14446:1 128.95493:3 131.0833:4 133.08745:2 135.0773:2 135.11502:2 147.11588:2 149.13176:4 157.10429:4 159.11607:2 161.13527:2 171.10652:3 173.12964:3 175.1105:2 177.11765:2 185.12621:4 187.13382:2 189.15808:4 199.13998:3 199.1…	FALSE	TRUE	TRUE	FALSE	FALSE	TRUE	117.75	425.375	193.125	412.938	486.25	875	1094.19	850.25	1118.5	1129.06	96.875	78.75	182	112.25	270.75	40.5625	32.6875	27.1875	52.8125	44.4375	9.09e-05	0.0564749	0.0161916	2e-06	9e-05	0.0363964
Glycerolipid	DAG	40:7	18:1	22:6		DAG 18:1-22:6	C43H70O5	ZILMKERHGSKQBG-HILQMKNTNA-N	CCCCCCCC\C=C/CCCCCCCC(=O)OCC(CO)OC(=O)CC\C=C/C\C=C/C\C=C/C\C=C/C\C=C/C\C=C/CC	10.8667	684.557	[M+NH4]+	447	71.08802:2 77.04008:4 79.05803:2 81.0703:6 83.08472:8 91.05002:6 93.07108:6 95.08267:6 97.0991:6 105.07099:8 107.08353:4 109.10043:8 119.08811:4 121.09808:6 125.13373:2 128.9534:4 131.08499:4 133.10056:2 135.1151:6 145.10359:4 147.11597:4 149.13702:6 155.08784:4 157.10262:8 159.11617:4 161.1282:4 161.13895:2 169.09357:4 171.11584:8 173.12418:4 175.14607:4 181.10559:6 183.11615:4 184.98044:4 185.1…	FALSE	TRUE	FALSE	FALSE	TRUE	TRUE	53.5	107.25	104.5	90	197.062	119.438	114	53.625	65.625	93.125	381.25	237.25	343.75	363.438	743.625	1357.94	1168.19	1010.38	1278.5	1058.56	0.452844	0.022024	3e-07	0.0188039	4.79e-05	0.0001078
Glycerolipid	DAG	36:4	18:2	18:2		DAG 18:2-18:2	C39H68O5	MQGBAQLIFKSMEM-MAZCIEHSNA-N	CCCCC\C=C/C\C=C/CCCCCCCC(=O)OCC(CO)OC(=O)CCCCCCC\C=C/C\C=C/CCCCC	10.367	634.537	[M+NH4]+	1186	109.11133:10 247.2511:10 261.23355:10 335.233:10 337.2691:133 526.82996:10 599.50085:122 617.51459:20	FALSE	FALSE	FALSE	FALSE	FALSE	TRUE	1103.06	1590.31	717.812	1369.62	2360.88	1503.31	1496.75	587.625	1136.38	1090	1115.75	661.062	1134.94	1140	2053.38	877.875	1023.62	944.812	880.625	924.062	0.43355	0.576869	0.144156	0.84187	0.239998	0.270603
Glycerolipid	DAG	38:7	18:2	20:5		DAG 18:2-20:5	C41H66O5	NJMRNAUCBISRLW-WJFLDVDQNA-N	CCCCC\C=C/C\C=C/CCCCCCCC(=O)OCC(CO)OC(=O)CCC\C=C/C\C=C/C\C=C/C\C=C/C\C=C/CC	9.67872	656.525	[M+NH4]+	1191	81.06801:10 91.05029:20 93.07135:20 95.09534:10 117.07851:20 131.0789:10 169.09584:10 201.16656:20 208.93842:10 265.19083:10 267.20963:31 335.25851:10 337.27396:102 357.24826:10 359.25644:31 611.51617:10 621.46484:20	FALSE	FALSE	FALSE	TRUE	FALSE	TRUE	67.1875	46.375	147.312	57.0625	277.938	98	147.75	99	100.938	138.438	3247.56	2152.69	3641.75	3112.75	7116.88	788.312	648.5	649.125	652.562	630.688	0.960448	0.0117333	5.4e-06	0.0117865	1e-07	0.0201654
Ether linked phospholipid	EtherPC	36:4e	16:0e	20:4		PC 16:0e/20:4	C44H82NO7P	SOUZQPFUXRVDGK-SHJNOZFHNA-N	CCCCCCCCCCCCCCCCOCC(COP([O-])(=O)OCC[N+](C)(C)C)OC(=O)CCCCCC\C=C/C\C=C/C\C=C/C\C=C/CC	9.79478	826.593	[M+Hac-H]-	359	203.43111:3 205.20192:15 255.22649:5 259.2388:31 296.95715:3 303.22916:454 377.23727:10 448.30536:20 448.31732:31 466.32751:117 750.17413:8 752.55273:452 767.50543:8 826.58295:36	FALSE	FALSE	TRUE	FALSE	FALSE	TRUE	385.062	315.125	352.375	344.438	578.438	1005.38	725.5	923.562	856.938	796.625	93.6875	81.5	124.125	73.5	66.75	89.4375	109.938	96.6875	75.75	92.25	0.0001262	0.0023037	0.0028483	5.6e-05	8.06e-05	0.681699
Ether linked phospholipid	EtherPE	38:7e	16:1e	22:6		PE 16:1e/22:6	C43H74NO7P	KGCPGAKRLOCUEV-ZLXBYIIJNA-N	CCCCCC\C=C/CCCCCCCCOCC(COP(O)(=O)OCCN)OC(=O)CC\C=C/C\C=C/C\C=C/C\C=C/C\C=C/C\C=C/CC	9.71225	746.511	[M-H]-	1000	95.0786:5 140.01434:15 177.166:10 196.03362:20 229.19469:15 239.2354:25 283.24368:138 327.2359:265 359.0419:5 418.27151:46 436.2749:127 746.50433:236	FALSE	FALSE	FALSE	FALSE	TRUE	TRUE	846.438	781.062	789.25	1094	1333.69	1328.81	1023.94	1009.69	985.938	960.375	747.375	589.5	864.562	586.438	660.562	1219.19	1172.06	1488.69	1142.88	1384	0.485638	0.0480254	0.03864	0.0024761	0.0493071	0.0001156
Ether linked phospholipid	EtherPE	38:5e	18:1e	20:4		PE 18:1e/20:4	C43H78NO7P	VLIJZYIABFUKFN-JZELYBSLNA-N	CCCCCCCC\C=C/CCCCCCCCOCC(COP(O)(=O)OCCN)OC(=O)CCCCCC\C=C/C\C=C/C\C=C/C\C=C/CC	10.9032	750.542	[M-H]-	364	78.95812:6 139.00798:2 140.01128:6 141.01648:3 156.97845:1 163.01247:2 176.937:2 179.02457:2 191.11403:2 196.03157:6 196.03749:13 205.19008:7 218.9888:3 227.14191:1 250.77853:2 253.53444:1 259.23907:31 263.24606:1 267.26993:8 281.2565:1 285.21265:4 301.22534:2 302.29156:4 303.23431:378 310.97867:1 328.97794:2 340.93646:2 355.03342:2 382.98694:2 403.25687:3 406.94592:2 411.72186:2 445.01636:1 446.…	FALSE	FALSE	TRUE	FALSE	FALSE	TRUE	319.688	357.625	321.188	451.312	521.125	1024.25	823.188	852.938	806.312	795.5	70.5	67.5	104.5	79	100.25	132.312	92.5	103.75	131.062	128.438	4.16e-05	0.0011687	0.0017946	3.38e-05	3.83e-05	0.0177357
Ether linked phospholipid	EtherPE	40:7e	18:1e	22:6		PE 18:1e/22:6	C45H78NO7P	IVBLZGVNSKPGOR-XAJDCCMMNA-N	CCCCCCCC\C=C/CCCCCCCCOCC(COP(O)(=O)OCCN)OC(=O)CC\C=C/C\C=C/C\C=C/C\C=C/C\C=C/C\C=C/CC	10.7309	774.545	[M-H]-	712	78.96493:6 105.07461:2 119.08249:4 127.0011:4 140.01227:8 141.01247:4 163.13797:4 177.1711:8 191.17395:4 191.18176:6 196.03499:14 222.94618:2 229.19823:18 247.15587:2 249.18976:8 267.26501:10 281.22311:4 283.24036:98 327.23221:212 328.98553:4 359.06204:4 403.26279:6 446.30063:39 464.31329:110 510.94699:2 725.86292:2 772.0918:4 774.53632:295	FALSE	FALSE	FALSE	FALSE	TRUE	TRUE	563.562	478	443.75	562.125	1044.62	962.125	848.5	684.875	671.688	750.5	470.438	436.25	530.625	459	577.625	825.875	919.125	1056.19	841.438	1120.5	0.212778	0.326292	0.0270874	0.0013857	0.0674146	9.67e-05
Free fatty acid	FA	16:0	16:0			FA 16:0	C16H32O2	IPCSVZSSVZVIGE-UHFFFAOYSA-N	CCCCCCCCCCCCCCCC(O)=O	6.33183	255.233	[M-H]-	97275	255.23315:31	TRUE	FALSE	FALSE	FALSE	FALSE	FALSE	113117	71914.7	67836.9	71858.8	109992	101246	92204.9	108390	106341	99665.4	104632	95333.7	116423	96015.2	101204	116481	107351	97188.8	82340.5	85965.6	0.225996	0.181769	0.387331	0.814949	0.61113	0.53327
Free fatty acid	FA	16:1	16:1			FA 16:1	C16H30O2	PJHOFUXBXJNUAC-KTKRTIGZSA-N	CCCCCCCC\C=C/CCCCCC(O)=O	5.76864	253.217	[M-H]-	16875	253.21472:262	FALSE	TRUE	FALSE	FALSE	FALSE	FALSE	35758.6	9511.31	11577.4	11527.9	31179.9	13758.5	13169.1	15716.4	15170.4	11733.1	14786.8	18821.4	24172	15349.4	21236.5	20832.8	15448.8	17250.9	10201	10290.3	0.345493	0.866855	0.41647	0.0316612	0.691207	0.171955
Free fatty acid	FA	17:0	17:0			FA 17:0	C17H34O2	KEMQGTRYUADPNZ-UHFFFAOYSA-N	CCCCCCCCCCCCCCCCC(O)=O	6.67528	269.248	[M-H]-	2219	269.25:168	TRUE	FALSE	FALSE	FALSE	FALSE	FALSE	2092.69	1740.75	2367.06	1748.5	2174.25	2680.31	1893.69	2474.38	2651.75	2502.75	2239.62	1899.25	2495.25	2197.38	2070.25	2612.19	2460.75	2186.69	1897.81	1997.06	0.057923	0.351409	0.291424	0.171478	0.317005	0.770265
Free fatty acid	FA	17:1	17:1			FA 17:1	C17H32O2	FJMPAYNWWWCODA-KHPPLWFESA-N	CCCCCCCCC\C=C/CCCCCC(O)=O	6.14808	267.232	[M-H]-	862	267.22607:31	FALSE	TRUE	FALSE	FALSE	FALSE	FALSE	1342.69	696.062	821	690.312	1377.44	856.75	697.75	850.062	898.75	854.812	945.75	894.875	1051.56	896.188	749.625	891.938	819.062	671.188	640.875	596.312	0.382228	0.652313	0.150801	0.239147	0.141321	0.0387214
Free fatty acid	FA	18:0	18:0			FA 18:0	C18H36O2	QIQXTHQIDYTFRH-UHFFFAOYSA-N	CCCCCCCCCCCCCCCCCC(O)=O	7.00166	283.264	[M-H]-	41297	283.26114:51	TRUE	FALSE	FALSE	FALSE	FALSE	FALSE	38188.7	39460.4	41808.4	35308.6	44925.2	40773.1	39154.9	44842.7	47851.6	45130.2	38508.4	40523.9	39786.6	41894.8	44242.8	39507.2	45318.2	39698.3	37801.8	41216.6	0.149746	0.594852	0.719226	0.205341	0.198339	0.864629
Free fatty acid	FA	18:1	18:1			FA 18:1	C18H34O2	UWHZIFQPPBDJPM-FPLPWBNLSA-N	CCCCCC\C=C/CCCCCCCCCC(O)=O	6.49416	281.248	[M-H]-	64135	116.92863:10 261.233:10 281.2493:2079	FALSE	TRUE	FALSE	FALSE	FALSE	FALSE	102995	48723.7	54739.4	49985.1	98939.8	67802.8	56083.3	70605.8	68249.3	56475.8	70109.4	61755.4	75239.2	60556.9	60676.9	77448.6	64459.3	51484.8	44415.3	41952.6	0.594801	0.688013	0.309754	0.68385	0.313958	0.219001
Free fatty acid	FA	18:2	18:2			FA 18:2	C18H32O2	GKJZMAHZJGSBKD-BLHCBFLLSA-N	CCCCC\C=C\C=C\CCCCCCCCC(O)=O	6.02688	279.233	[M-H]-	70442	243.20326:10 261.21884:51 262.23465:5 278.35995:31 279.23166:1767	FALSE	FALSE	FALSE	FALSE	FALSE	TRUE	89101.6	42747.2	43825	42510.9	87281.9	72012.2	58174.6	76616.4	80081.9	62208.3	84880.1	73922.5	103610	75889.6	74939.6	89150.9	84809.9	64792.9	53888.6	48406.1	0.481948	0.120395	0.618417	0.103511	0.864722	0.18168
Free fatty acid	FA	18:3	18:3			FA 18:3	C18H30O2	ZSXWVPXJLXTOQQ-ARQDATDDSA-N	CC\C=C\C=C\C=C\CCCCCCCCCC(O)=O	5.59345	277.217	[M-H]-	6083	233.22797:10 277.2157:173	FALSE	FALSE	FALSE	FALSE	FALSE	TRUE	6490.12	3136.12	3144	3037	7110.31	7800.44	6874.5	6478.31	7150	5872	7867.25	6764.25	8844.94	6011.5	6313.69	7923.19	6703	5552.5	4969.12	3624.44	0.0481171	0.039888	0.346215	0.612476	0.215111	0.15834
Free fatty acid	FA	20:0	20:0			FA 20:0	C20H40O2	VKOBVWXKNCXXDE-UHFFFAOYSA-N	CCCCCCCCCCCCCCCCCCCC(O)=O	7.575	311.295	[M-H]-	797	184.02171:2 188.93889:12 228.92484:4 311.29453:171	TRUE	FALSE	FALSE	FALSE	FALSE	FALSE	609.25	659.25	572.125	673.688	788.812	839	940.562	884.875	958.188	963.938	1035.5	648.688	900.875	761.188	942.125	738.75	822	732.375	702.25	763.875	0.0003874	0.034889	0.0612481	0.434681	0.0007469	0.201702
Free fatty acid	FA	20:1	20:1			FA 20:1	C20H38O2	BITHHVVYSMSWAG-MDZDMXLPSA-N	CCCCCCCC\C=C\CCCCCCCCCC(O)=O	7.08496	309.279	[M-H]-	2516	79.9554:1 118.93696:2 151.04274:1 182.96173:1 224.90009:2 227.19972:2 291.26913:2 309.27728:142	FALSE	TRUE	FALSE	FALSE	FALSE	FALSE	3401.5	2543.81	1993.5	1667.62	3055.25	2515.75	1676.19	2498.06	1907.88	2175.5	3898.56	3248.44	2452.56	2481.88	2446.12	3569.62	3291.56	2090.81	1487.69	1916.75	0.326	0.414857	0.909082	0.0550326	0.490392	0.410369
Free fatty acid	FA	20:3	20:3			FA 20:3	C20H34O2	UNSRRHDPHVZAHH-YOILPLPUSA-N	CCCCCCCC\C=C/C\C=C/C\C=C/CCCC(O)=O	6.29129	305.247	[M-H]-	1437	305.24481:71	FALSE	FALSE	FALSE	FALSE	FALSE	TRUE	2421.75	1511	1299.12	1577.75	2552.69	1443.88	1408.56	1768.56	1850.81	1740.06	1332.12	1014.88	1483.12	1293.5	1120.31	1042.38	1219.75	909.625	925.688	832.375	0.421271	0.0700705	0.0234856	0.0121649	0.0003933	0.0385523
Free fatty acid	FA	20:4	20:4			FA 20:4	C20H32O2	YZXBAPSDXZZRGB-CGRWFSSPSA-N	CCCCC\C=C\C\C=C\C\C=C\C\C=C\CCCC(O)=O	5.97873	303.232	[M-H]-	16118	182.77464:10 303.2345:51	FALSE	FALSE	TRUE	FALSE	FALSE	TRUE	6843.56	4790.38	5381.25	5250.75	10409.2	44918.1	42516.1	56082.4	61571.3	55512.7	3821.56	3064.75	4717.56	3219.5	3794.88	2262.81	2017.06	2295.25	1987.62	1896.88	0.0001074	0.0500298	0.0122282	0.0001675	0.0001564	0.0037694
Free fatty acid	FA	20:5	20:5			FA 20:5	C20H30O2	JAZBEHYOTPTENJ-JLNKQSITSA-N	CC\C=C/C\C=C/C\C=C/C\C=C/C\C=C/CCCC(O)=O	5.55264	301.217	[M-H]-	10922	121.10378:3 157.06831:3 214.95245:3 229.20067:7 255.2222:3 257.22784:14 301.21561:17	FALSE	FALSE	FALSE	TRUE	FALSE	TRUE	734.625	324	426.812	397.25	867.75	826.188	833.625	908.188	966.312	891.812	37223.3	31944.7	52228.9	27647.1	36747.4	5328.69	6011.25	5083.25	4179.56	4859.81	0.0320873	0.0009096	6e-07	0.0009464	0.0001367	0.0014668
Free fatty acid	FA	22:4	22:4			FA 22:4	C22H36O2	IGFLWIHPPADNDL-GFRMADBLSA-N	CC\C=C\C\C=C\C\C=C\C\C=C\CCCCCCCCC(O)=O	6.54401	331.264	[M-H]-	1705	182.92311:10 280.86328:10 289.18866:10 295.23056:20 313.25391:61 329.27673:10 331.25888:122	FALSE	FALSE	FALSE	FALSE	FALSE	TRUE	735.062	1068.88	571.75	806.875	1271.19	4650.25	3399.31	4547.31	7428	5476.69	445.375	384.562	536.5	359.312	515.125	475.125	452.688	328.875	392.188	256.5	0.0027821	0.0211889	0.0045542	0.0022187	0.0020916	0.242632
Free fatty acid	FA	22:5	22:5			FA 22:5	C22H34O2	YUFFSWGQGVEMMI-RCHUDCCISA-N	CC\C=C\C\C=C\C\C=C\C\C=C\C\C=C\CCCCCC(O)=O	6.1861	329.249	[M-H]-	4408	329.24976:41	FALSE	FALSE	FALSE	FALSE	FALSE	TRUE	1083.44	615.312	574.312	536.25	1469.81	1823.94	1640.62	2294.06	3659.69	2870.38	14258.9	9129.12	15634.8	9551.81	11557.9	2648.12	2396.25	2401.69	2261.5	1744.19	0.0045627	0.0008226	0.0003008	0.0010886	0.684848	0.0014728
Free fatty acid	FA	22:6	22:6			FA 22:6	C22H32O2	MBMBGCFOFBJSGT-SFGLVEFQSA-N	CC\C=C\C\C=C\C\C=C\C\C=C\C\C=C\C\C=C\CCC(O)=O	5.85774	327.232	[M-H]-	21670	79.05939:5 93.0684:10 107.08194:10 117.06978:15 121.09765:15 133.09795:10 135.11592:15 161.1297:15 173.13422:5 175.14516:10 187.14949:10 188.93925:25 229.18358:15 255.20189:10 267.15915:5 283.23822:31 309.2319:5 327.23492:41	FALSE	FALSE	FALSE	FALSE	TRUE	TRUE	6548.5	2939.94	3636.06	3595.25	9609.06	6259.75	4218.5	6942.5	9608.75	7394.62	17529.4	12658.3	20249.1	13488.9	17209.1	67126.2	58550.1	59188.2	57199.6	49445.8	0.319553	0.0003868	1e-07	0.0004692	1.69e-05	9e-07
Hexosyl ceramide	HexCer-NS	d30:1	d18:1	12:0		HexCer-NS d18:1/12:0	C36H69NO8	IYCYEZLMOLRFAN-WJTDDFOZNA-N	CCCCCCCCCCCCC\C=C\C(O)C(COC1OC(CO)C(O)C(O)C1O)NC(=O)CCCCCCCCCCC	8.13584	702.514	[M+Hac-H]-	8100	71.01324:41 85.02641:15 89.02238:277 101.02399:158 113.02246:122 119.03307:283 143.03516:41 149.04378:41 161.04312:61 179.0558:122 181.1539:56 198.18005:61 199.17049:122 224.20113:334 237.22408:92 240.19762:76 252.18741:15 261.80725:5 263.24298:82 268.25964:20 280.26746:25 298.27356:20 432.39673:10 432.42606:82 444.41483:25 448.40369:51 450.4198:107 460.39548:5 462.42618:61 480.43954:1570 636.819…	TRUE	FALSE	FALSE	FALSE	FALSE	FALSE	6194.19	5168.5	7414.12	7413.12	8678	9316.56	6575.12	8217.5	8891.5	9921.31	8826.12	7262.62	9558	9080.12	7643.25	9016.94	8741.06	8095.81	7437.19	8549.44	0.0879539	0.0774752	0.0673125	0.882215	0.743035	0.842934
Hexosyl ceramide	HexCer-NS	d34:1	d18:1	16:0		HexCer-NS d18:1/16:0	C40H77NO8	VJLLLMIZEJJZTE-ORIPQNMZNA-N	CCCCCCCCCCCCCCCC(=O)NC(COC1OC(CO)C(O)C(O)C1O)C(O)\C=C\CCCCCCCCCCCCC	9.20285	758.578	[M+Hac-H]-	432	89.01819:20 89.02351:31 101.02226:20 107.03869:10 113.03103:10 119.03412:41 161.04396:10 235.19679:10 255.23517:51 270.98669:10 280.26038:41 506.48511:31 518.52094:21 536.46045:92 536.50299:308 698.5578:499	TRUE	FALSE	FALSE	FALSE	FALSE	FALSE	450.25	1355.06	393.938	552.812	770.375	446.125	367.062	393.062	337.938	397.375	311.312	238.688	379.312	377.938	332.25	236.312	295.375	259.5	416.312	324.812	0.145015	0.0972955	0.0845458	0.0913566	0.0532034	0.612271
Hexosyl ceramide	HexCer-NS	d40:1	d18:1	22:0		HexCer-NS d18:1/22:0	C46H89NO8	YIGARKIIFOHVPF-LAPDZXRHNA-N	CCCCCCCCCCCCCCCCCCCCCC(=O)NC(COC1OC(CO)C(O)C(O)C1O)C(O)\C=C\CCCCCCCCCCCCC	12.7063	842.666	[M+Hac-H]-	654	87.04369:2 89.02551:33 101.02721:14 113.02425:20 119.02406:4 119.03176:27 131.03976:4 143.03683:4 161.04829:10 179.0573:16 235.61322:2 237.21866:10 250.25391:2 263.237:10 305.05261:4 321.30676:12 321.32446:6 338.34085:10 339.3226:18 364.32355:4 364.35049:31 380.34808:10 411.04825:6 442.91901:2 447.46805:2 512.90765:2 572.57312:6 586.85492:2 588.56183:8 590.57977:10 598.99677:2 602.57281:6 620.591…	TRUE	FALSE	FALSE	FALSE	FALSE	FALSE	573.938	759.438	501.25	1161.38	1073.69	712	728.625	892.125	935.938	804.875	482.062	389.5	657.5	614.375	506.375	366.625	434.938	470.688	395.562	613.875	0.995681	0.0772032	0.0325355	0.0023641	0.0003984	0.286662
Hexosyl ceramide	HexCer-NS	d42:1	d18:1	24:0		HexCer-NS d18:1/24:0	C48H93NO8	POQRWMRXUOPCLD-MHAUTQJVNA-N	CCCCCCCCCCCCCCCCCCCCCCCC(=O)NC(COC1OC(CO)C(O)C(O)C1O)C(O)\C=C\CCCCCCCCCCCCC	13.1374	870.697	[M+Hac-H]-	952	89.02485:92 97.03477:3 101.02368:41 107.03577:3 113.02653:31 119.03411:78 131.03416:10 141.01823:10 149.04466:10 161.04393:24 179.05272:58 237.22214:37 263.23386:24 349.34149:14 366.37234:34 367.34796:41 392.36969:14 392.38647:75 408.37411:27 460.32993:10 600.58203:17 600.61316:24 616.59363:17 618.59583:27 630.61707:24 648.62323:519 810.61102:38 810.67529:1202 811.6759:20 870.69025:17	TRUE	FALSE	FALSE	FALSE	FALSE	FALSE	714.75	1974.44	744.25	2000.12	1538.62	949.5	920.625	1269.19	1207.19	1064.62	677.875	546.438	784.062	876.625	636.125	534.625	643.125	636.062	618	711	0.339047	0.0706887	0.0536953	0.0029403	0.0002894	0.272153
Lyso phospholipid	LPC	16:0	16:0			LPC 16:0	C24H50NO7P	ASWBNKHCZGQVJV-UHFFFAOYNA-N	CCCCCCCCCCCCCCCC(=O)OCC(O)COP([O-])(=O)OCC[N+](C)(C)C	6.12758	554.343	[M+Hac-H]-	8560	77.24081:1 78.96033:38 87.95695:2 89.36791:4 122.98478:4 125.00056:1 151.32947:3 152.99513:29 157.377:2 160.1183:2 163.19856:2 168.04495:34 171.00822:5 174.25992:2 194.0632:2 223.364:2 224.07098:71 235.20583:3 237.21825:11 242.07822:129 254.43588:35 254.47865:3 255.23099:7862 256.23056:11 256.40677:2 258.0701:2 259.40918:2 260.90668:2 263.52963:2 267.228:5 274.37473:2 285.49808:1 409.23575:4 435.…	TRUE	FALSE	FALSE	FALSE	FALSE	FALSE	7219.5	7607.5	6708.69	9876.69	11846.2	9727.31	8320.94	9311.94	9721.88	10277.5	7853.56	7605.69	12013.1	8171.75	9051.25	5890.38	7155.12	7270.56	7184.06	8387.75	0.443945	0.824992	0.195218	0.55718	0.0020699	0.0855275
Lyso phospholipid	LPC	16:0	16:0			LPC 16:0	C24H50NO7P	ASWBNKHCZGQVJV-UHFFFAOYNA-N	CCCCCCCCCCCCCCCC(=O)OCC(O)COP([O-])(=O)OCC[N+](C)(C)C	6.27077	554.345	[M+Hac-H]-	71379	78.95867:503 122.98658:41 152.99237:240 168.04411:375 194.05879:61 224.06882:2202 237.22273:52 242.07843:490 254.43404:184 254.91367:52 255.16379:53 255.23366:34611 391.21634:92 409.23602:41 478.79773:41 480.30872:5257 491.05847:10 554.34491:51	TRUE	FALSE	FALSE	FALSE	FALSE	FALSE	61425.6	67853	56887.4	72660.6	94158	76708.3	65465.8	79028	86901.6	76145.5	69384.8	54827.4	86196.1	72427.4	85257.7	55900.4	63263.6	58544.2	66119.9	78425.8	0.418493	0.736579	0.440405	0.643304	0.0446325	0.225274
Lyso phospholipid	LPC	16:1	16:1			LPC 16:1	C24H48NO7P	LFUDDCMNKWEORN-KHPPLWFENA-N	CCCCCC\C=C/CCCCCCCC(=O)OCC(O)COP([O-])(=O)OCC[N+](C)(C)C	5.73085	552.329	[M+Hac-H]-	1755	78.96111:8 153.00082:4 168.04013:8 206.16687:2 224.07043:29 235.19243:2 242.0779:10 253.21954:253 283.25452:4 394.87427:2 478.29639:69 552.34521:4	FALSE	TRUE	FALSE	FALSE	FALSE	FALSE	3256.69	1295.62	2587.06	2230.12	3218.56	1326.44	1107.38	2023.81	1102	2653.19	1555.5	1333.75	2378.94	1730.12	1692.81	946.062	1220.31	971.375	1125.62	1353.06	0.101122	0.088343	0.0167768	0.791733	0.164638	0.0121141
Lyso phospholipid	LPC	17:1	17:1			LPC 17:1	C25H50NO7P	LPMGFNAQZPADDZ-QXMHVHEDNA-N	CCCCCCC\C=C/CCCCCCCC(=O)OCC(O)COP([O-])(=O)OCC[N+](C)(C)C	6.06348	566.345	[M+Hac-H]-	3262	76.86701:2 78.95935:37 94.5872:2 122.98885:4 134.98355:4 149.14481:2 152.99655:16 168.03931:24 171.01363:4 188.93985:4 224.06731:171 242.0768:35 249.22641:4 267.23373:1944 269.08685:4 294.89993:8 324.95285:2 400.86185:10 402.86728:4 403.23837:4 421.22845:6 484.84341:4 490.7739:4 492.30988:494 493.31537:4 505.32791:2 566.34192:6	FALSE	TRUE	FALSE	FALSE	FALSE	FALSE	3513.19	2186.31	3403.75	2977.94	2978.94	3291.12	2886	2278.88	2958.44	3637.19	4112.38	2892.44	5183.19	3181.5	2951.69	3757.62	3594.19	3730.69	2419.44	3300.12	0.995956	0.225517	0.337	0.221688	0.328475	0.563421
Lyso phospholipid	LPC	18:0	18:0			LPC 18:0	C26H54NO7P	IHNKQIMGVNPMTC-UHFFFAOYNA-N	CCCCCCCCCCCCCCCCCC(=O)OCC(O)COP([O-])(=O)OCC[N+](C)(C)C	6.89722	582.377	[M+Hac-H]-	20190	78.95904:131 82.53306:4 96.89105:4 122.98221:6 134.98152:6 152.99788:65 167.51799:4 168.04071:114 170.9966:4 174.2296:4 177.97444:4 179.00937:4 182.6581:4 188.94328:4 192.12573:4 194.05898:8 218.0294:4 224.07104:696 242.07851:188 265.25552:16 282.37479:49 283.09131:7 283.26465:11677 284.2677:6 285.68256:4 286.96707:4 290.48911:4 294.90427:4 301.83578:4 312.28925:2 375.78708:2 419.22629:8 419.2551…	TRUE	FALSE	FALSE	FALSE	FALSE	FALSE	15068.4	28358.2	16392.8	27649.8	27069.4	25717.1	23758.2	28316.6	28744.5	27478.4	17828.6	13693.1	23692.2	17856.7	20262.6	9633.75	13945.4	10781	13462.1	14087.8	0.264903	0.243863	0.0204719	0.0025376	3.8e-06	0.0101327
Lyso phospholipid	LPC	18:0	18:0			LPC 18:0	C26H54NO7P	IHNKQIMGVNPMTC-UHFFFAOYNA-N	CCCCCCCCCCCCCCCCCC(=O)OCC(O)COP([O-])(=O)OCC[N+](C)(C)C	6.76452	582.378	[M+Hac-H]-	4404	75.98586:1 78.95894:12 152.99442:5 168.03893:6 171.54694:2 187.70218:2 188.93756:2 224.07123:13 242.08092:21 248.59392:1 265.24661:2 282.37747:7 283.26495:1172 284.26801:2 287.77347:2 288.88757:2 294.90701:7 344.68375:1 376.9017:2 394.84467:2 400.86469:6 402.88431:2 434.89047:1 500.82153:4 506.71841:3 508.27277:3 508.34274:151 538.88672:1 580.82916:1 582.39789:2	TRUE	FALSE	FALSE	FALSE	FALSE	FALSE	2740.62	4968.19	2206.19	4429.44	3800	3935.38	4480.88	6690.5	4147.25	3692.06	10048.1	2654.88	13295.2	4719.44	2693.75	1297.06	2981.25	2881.81	2127.44	4283.88	0.234011	0.22948	0.236029	0.389748	0.0339142	0.137289
Lyso phospholipid	LPC	18:1	18:1			LPC 18:1	C26H52NO7P	YAMUFBLWGFFICM-SEYXRHQNNA-N	CCCCCCCC\C=C/CCCCCCCC(=O)OCC(O)COP([O-])(=O)OCC[N+](C)(C)C	6.39741	580.36	[M+Hac-H]-	13555	78.95866:102 103.24001:2 113.06009:2 122.98174:6 152.99387:43 168.04382:67 171.00159:4 180.03537:4 188.93106:4 191.00809:4 194.0584:6 218.79617:4 224.06831:411 242.07787:104 263.23874:4 280.36469:27 281.24899:6139 282.24609:6 282.86038:4 298.02057:4 331.40057:4 352.00351:4 385.83353:2 417.23727:6 431.12778:2 435.25977:10 504.72391:10 506.32602:1562 513.6676:4 521.28436:10 564.77667:2 580.3443:10 …	FALSE	TRUE	FALSE	FALSE	FALSE	FALSE	16692.1	15417.4	20737.6	25794.9	24207.6	15685.6	9871.06	12192.9	11082.6	12795.4	12022.7	11084.1	14604.2	10488.1	9554.44	8856	11002.9	7934.69	12385.9	8685.44	0.0063617	0.0034622	0.0011481	0.568649	0.0815261	0.175571
Lyso phospholipid	LPC	18:2	18:2			LPC 18:2	C26H50NO7P	SPJFYYJXNPEZDW-UTJQPWESNA-N	CCCCC\C=C/C\C=C/CCCCCCCC(=O)OCC(O)COP([O-])(=O)OCC[N+](C)(C)C	5.96224	578.345	[M+Hac-H]-	26420	78.94888:14 78.95765:212 122.98361:20 152.9977:129 168.04234:197 171.00748:10 194.05484:14 223.37227:14 224.06873:1155 242.07829:318 261.22617:51 278.35815:75 279.23459:17470 280.2352:20 415.22849:20 425.96115:3 433.22858:14 502.72308:24 504.2713:27 504.30933:3427 519.28625:20 578.33783:20	FALSE	FALSE	FALSE	FALSE	FALSE	TRUE	32830.9	27985	34644.3	39639.4	41350.9	17452.4	13306.8	16002.7	18738.8	19271.1	28261.8	23929.1	34180.1	24691.8	26828.1	22773.6	25869.9	26601.1	29222.4	24811.5	0.0001163	0.0337365	0.0070626	0.0010161	0.0003609	0.437197
Lyso phospholipid	LPC	20:3	20:3			LPC 20:3	C28H52NO7P	XUDGAAFUMTTZCO-QNEBEIHSNA-N	CC\C=C/C\C=C/C\C=C/CCCCCCCCCC(=O)OCC(O)COP([O-])(=O)OCC[N+](C)(C)C	6.20575	604.358	[M+Hac-H]-	1028	78.9592:14 152.98679:2 152.99202:7 168.04356:15 172.59734:1 207.20885:2 224.06743:74 231.21167:1 242.08116:24 261.26086:6 285.22964:1 287.23965:5 294.90179:3 303.23209:3 304.28955:3 305.24527:666 306.24451:3 334.88535:2 360.16693:2 400.8714:6 416.89963:3 441.22275:2 506.83264:4 522.87207:2 528.64709:2 530.30945:264 531.35297:2 542.79108:1 545.29559:1 554.31775:1 602.45599:1 604.34845:3	FALSE	FALSE	FALSE	FALSE	FALSE	TRUE	2359.62	1446.94	2405.44	2830	2625.94	339.125	265.5	388.938	360.688	451.625	829.125	716.938	1296.69	742.375	438.625	512.125	671.5	546.188	792.188	533.125	0.001021	0.0005346	0.0014458	0.031704	0.0035503	0.23011
Lyso phospholipid	LPC	20:4	20:4			LPC 20:4	C28H50NO7P	GOMVPVRDBLLHQC-DOFZRALJNA-N	CC\C=C/C\C=C/C\C=C/C\C=C/CCCCCCC(=O)OCC(O)COP([O-])(=O)OCC[N+](C)(C)C	5.92898	602.344	[M+Hac-H]-	9122	77.23607:3 78.95931:153 81.48172:3 90.35136:3 121.09943:7 152.99625:109 156.94302:3 163.07726:10 168.0426:146 177.09087:24 177.16034:10 191.10422:17 194.06093:17 205.19406:112 217.19255:17 220.73152:3 224.06882:847 225.18329:14 231.21527:48 242.07614:252 257.23236:10 259.2413:506 285.21973:54 301.21793:31 302.28659:24 303.22937:6054 435.23907:3 439.2103:14 457.22845:10 526.63892:20 528.25269:17 5…	FALSE	FALSE	TRUE	FALSE	FALSE	TRUE	6175.44	4718.75	7647.31	6505.62	11575.9	24477.2	19793.7	26532.1	29866.1	26455.4	2762.88	2168.38	2846.81	2279.69	1698.88	1030.56	1459	1076.88	1646.62	1730.75	1.91e-05	0.0118291	0.0065594	0.0001289	0.0001197	0.0053461
Lyso phospholipid	LPC	20:5	20:5			LPC 20:5	C28H48NO7P	PDIGSOAOQOXRDU-WMPRHZDHNA-N	CC\C=C/C\C=C/C\C=C/C\C=C/C\C=C/CCCC(=O)OCC(O)COP([O-])(=O)OCC[N+](C)(C)C	5.52872	600.33	[M+Hac-H]-	2209	78.95874:73 81.67486:2 117.07394:4 121.09567:4 122.98644:8 135.12039:8 149.12833:4 151.15115:10 152.99382:53 163.15225:8 168.0419:73 169.95322:2 175.15582:2 177.09204:10 177.16716:4 181.12172:4 191.1152:4 193.1218:4 203.18114:59 215.18152:6 217.12531:4 219.14047:4 223.16713:22 224.06598:347 227.63261:2 229.1936:18 231.1416:8 242.07761:96 245.15201:4 253.19901:2 255.21696:6 257.22937:321 267.54602…	FALSE	FALSE	FALSE	TRUE	FALSE	TRUE	550.312	324.938	372.25	319.188	466.375	36.625	30.6875	51.4375	39.5625	65.875	7224.94	6997.88	9567.5	5222.25	4544.19	1559.75	1826.94	1583.44	1778.94	1617.31	0.0011025	0.0019628	1e-07	0.0016135	5.9e-06	0.0044957
Lyso phospholipid	LPC	22:5	22:5			LPC 22:5	C30H52NO7P	BIEOSECQPGGZMF-WMPRHZDHNA-N	CC\C=C/C\C=C/C\C=C/C\C=C/C\C=C/CCCCCC(=O)OCC(O)COP([O-])(=O)OCC[N+](C)(C)C	6.07824	628.361	[M+Hac-H]-	761	78.95882:6 152.99283:6 165.17068:2 168.04282:10 224.0696:31 231.21184:6 242.0793:10 279.22409:2 285.25693:22 294.91028:6 323.97772:2 328.20483:4 329.25116:208 391.96902:2 464.14307:2 506.8157:6 546.82831:4 554.26093:4 554.32733:139 628.36108:4	FALSE	FALSE	FALSE	FALSE	FALSE	TRUE	448.625	273.625	335.688	252.625	356.125	560.062	226.312	372.625	422.562	461	2150.5	1647	2762.38	1561.88	1858.69	346.75	250.875	449.625	266.125	207.125	0.2803	0.001334	0.609657	0.0013057	0.172344	0.0011495
Lyso phospholipid	LPC	22:6	22:6			LPC 22:6	C30H50NO7P	LSOWKZULVQWMLY-WSDBEMKQNA-N	CC\C=C/C\C=C/C\C=C/C\C=C/C\C=C/C\C=C/CCC(=O)OCC(O)COP([O-])(=O)OCC[N+](C)(C)C	5.88135	626.345	[M+Hac-H]-	6444	78.96049:61 105.06783:5 119.08131:3 123.11983:10 131.09018:3 134.98952:8 147.11082:5 152.99229:31 163.08395:10 168.04205:38 172.09198:3 173.13382:8 177.16727:23 189.16185:8 191.18158:13 194.05827:8 203.17508:10 215.17522:8 217.1252:8 224.07007:318 229.19128:61 241.19344:13 242.08174:94 249.18681:23 255.21664:13 283.24408:422 309.22299:10 327.23074:861 380.78192:3 460.9689:3 542.76984:3 550.57532:…	FALSE	FALSE	FALSE	FALSE	TRUE	TRUE	4831.69	2702.12	4440.06	3765.69	6256.56	4181.19	3160.62	4174.88	5914.62	5096.31	7292.81	5535.31	6928.56	6508.5	6107.31	9537.19	11675	10064	11022	9687.19	0.890929	0.0140971	3.18e-05	0.0078262	1.27e-05	6.07e-05
Lyso phospholipid	LPE	16:0	16:0			LPE 16:0	C21H44NO7P	YVYMBNSKXOXSKW-UHFFFAOYNA-N	CCCCCCCCCCCCCCCC(=O)OCC(O)COP(O)(=O)OCCN	6.34121	452.274	[M-H]-	1536	78.95798:31 153.00198:10 196.03831:62 208.91869:10 214.05467:21 255.23268:487 452.27332:31	TRUE	FALSE	FALSE	FALSE	FALSE	FALSE	1118.56	2018.81	1021	1822.56	2665.38	1419.25	1059.31	1181.12	1539.81	1831.56	1319.5	1107.12	1871.62	1313.38	1561.56	1514.56	1380.12	1369.69	1694.75	1901.06	0.359948	0.398821	0.636376	0.883999	0.356466	0.430044
Lyso phospholipid	LPE	18:0	18:0			LPE 18:0	C23H48NO7P	BBYWOYAFBUOUFP-UHFFFAOYNA-N	CCCCCCCCCCCCCCCCCC(=O)OCC(O)COP(O)(=O)OCCN	6.96232	480.307	[M-H]-	1116	178.26534:10 196.0345:31 214.05273:10 283.26617:287 286.28543:20 368.31836:10 480.29538:41	TRUE	FALSE	FALSE	FALSE	FALSE	FALSE	743	1496.69	1364.94	1708.62	1674.5	1092.44	1304	1005.94	1341.12	1256.19	1011.5	627.312	1285.06	1198.25	1490.5	704.25	733.375	653.5	812.875	810.375	0.320362	0.261807	0.0190179	0.640261	0.0002101	0.0584799
Lyso phospholipid	LPE	18:2	18:2			LPE 18:2	C23H44NO7P	DBHKHNGBVGWQJE-HZJYTTRNNA-N	CCCCC\C=C/C\C=C/CCCCCCCC(=O)OCC(O)COP(O)(=O)OCCN	6.02547	476.276	[M-H]-	1402	196.04024:25 274.82693:5 279.22794:122 476.27631:25	FALSE	FALSE	FALSE	FALSE	FALSE	TRUE	2037.25	1711.12	2090.38	2184.06	2166.19	893.812	844.688	1019.44	1076.38	723.375	1733.38	1170.38	1713.62	1189.81	1277.94	1174	1655.25	1281.81	1178.06	913.062	5.5e-06	0.0036256	0.0006486	0.007194	0.0416015	0.341222
Lyso phospholipid	LPE	20:4	20:4			LPE 20:4	C25H44NO7P	JPNPIRVRGLGTRE-LTKCOYKYNA-N	CC\C=C/C\C=C/C\C=C/C\C=C/CCCCCCC(=O)OCC(O)COP(O)(=O)OCCN	5.99738	500.275	[M-H]-	1836	78.95898:92 137.84064:10 140.01265:82 196.02548:20 196.03537:112 205.19601:31 214.04944:51 259.24594:92 271.93369:10 280.24002:10 303.20258:31 303.22961:561 498.69125:10 500.27429:82	FALSE	FALSE	TRUE	FALSE	FALSE	TRUE	2267.38	1832.81	2444.81	2035.75	3265.06	4154.81	3470.69	3986.56	3545.19	4379.75	782.688	493.938	697.188	664.188	555.375	456.438	525	459.125	359.75	341.562	0.0009471	0.0017304	0.0012527	1.7e-05	2.3e-05	0.0092078
Lyso phospholipid	LPE	20:5	20:5			LPE 20:5	C25H42NO7P	KCWGBXXAJHVZNN-JLNKQSITNA-N	CC\C=C/C\C=C/C\C=C/C\C=C/C\C=C/CCCC(=O)OCC(O)COP(O)(=O)OCCN	5.59948	498.26	[M-H]-	519	177.90222:3 188.93674:5 207.92494:3 214.05084:8 257.22037:8 293.15884:3 294.90814:13 301.21243:36 400.86005:8 498.24899:8	FALSE	FALSE	FALSE	TRUE	FALSE	TRUE	85.125	54.4375	75.75	42.6875	41.6875	12.5	7.5	0	6	23	1646.81	1315.5	2136.25	1215.25	1205.88	416.938	747.5	534.25	367.812	453	0.0007992	0.0012139	0.0024183	0.0010796	0.0017353	0.0007442
Lyso phospholipid	LPE	22:6	22:6			LPE 22:6	C27H44NO7P	XEVRBOQZSXWGQO-KUBAVDMBNA-N	CC\C=C/C\C=C/C\C=C/C\C=C/C\C=C/C\C=C/CCC(=O)OCC(O)COP(O)(=O)OCCN	5.94339	524.276	[M-H]-	3448	78.95776:76 107.09072:15 135.12257:5 140.00945:46 152.99271:10 193.12852:5 196.03363:158 214.04353:56 225.15817:5 229.19037:31 249.18825:15 283.24115:153 309.2276:20 327.22031:112 327.23053:260 524.25397:56	FALSE	FALSE	FALSE	FALSE	TRUE	TRUE	2604.75	1726.25	2640.62	2136.25	3330.25	2545.12	2594.19	2678.88	3294.12	2963.81	3435.56	2796.62	4390.38	3297.31	3361.5	4451.44	4796.12	5620.06	4194.44	6101.56	0.311857	0.0320022	0.0004722	0.0611475	0.0004296	0.0074228
Glycerolipid	MAG	16:0	16:0			MAG 16:0	C19H38O4	QHZLMUACJMDIAE-UHFFFAOYNA-N	CCCCCCCCCCCCCCCC(=O)OCC(O)CO	6.92408	348.308	[M+NH4]+	901	71.08759:15 83.08428:5 95.08635:10 98.98878:10 101.06584:5	TRUE	FALSE	FALSE	FALSE	FALSE	FALSE	841.25	692.562	1125.69	977.812	1035	944.125	1204.06	761.625	1070.62	1035.69	829.688	635	817.625	884.062	763.312	1162.44	834.438	749.875	692.688	961.125	0.533667	0.126409	0.643941	0.0334384	0.301264	0.345189
Glycerolipid	MAG	18:1	18:1			MAG 18:1	C21H40O4	RZRNAYUHWVFMIP-KTKRTIGZNA-N	CCCCCCCC\C=C/CCCCCCCC(=O)OCC(O)CO	7.0288	374.326	[M+NH4]+	4051	79.05448:20 79.062:10 81.06671:82 83.08366:102 91.05834:10 93.06725:41 95.08569:92 97.09658:41 101.08927:10 107.08382:31 109.10072:51 111.12603:10 121.10151:61 129.95222:10 135.11055:41 149.13399:20 153.12488:10 167.13846:10 213.18954:10 247.23531:41 265.25296:51 282.13593:10 339.28516:61	FALSE	TRUE	FALSE	FALSE	FALSE	FALSE	3643.62	2812.81	2467.94	3404.12	5285.44	4905.88	3895.25	4042.25	4610.25	4547.38	5265.5	3380.62	5392	4757.12	4813.94	4678.94	4117.44	2716.25	2791.5	3496.31	0.13152	0.0825472	0.953301	0.448499	0.0821056	0.056198
Phospholipid	PC	32:0	16:0	16:0		PC 16:0-16:0	C40H80NO8P	KILNVBDSWZSGLL-UHFFFAOYNA-N	CCCCCCCCCCCCCCCC(=O)OCC(COP([O-])(=O)OCC[N+](C)(C)C)OC(=O)CCCCCCCCCCCCCCC	9.79489	792.574	[M+Hac-H]-	1898	165.09195:5 168.03836:15 224.07268:25 246.994:5 255.23323:1139 462.30301:25 480.30475:51 718.53003:565 792.53528:31 792.55511:41	TRUE	FALSE	FALSE	FALSE	FALSE	FALSE	1650.19	1730.25	1563.88	1881.31	2310.62	2834.38	1977.94	2325.69	2341.12	2348.62	1646.31	2004.81	2294.62	1929.88	1510.19	1499.12	1603.81	1644.62	1152.19	1704.94	0.0218576	0.800231	0.0990773	0.036054	0.0010202	0.0686035
Phospholipid	PC	32:1	16:0	16:1		PC 16:0-16:1	C40H78NO8P	QIBZFHLFHCIUOT-ZPHPHTNENA-N	CCCCCCCCCCCCCCCC(=O)OCC(COP([O-])(=O)OCC[N+](C)(C)C)OC(=O)CCCCCCC\C=C/CCCCCC	9.14471	790.557	[M+Hac-H]-	1583	78.95243:2 126.99641:2 130.9511:1 141.02933:2 168.04584:10 224.05383:3 224.06862:12 227.20334:24 253.21986:405 255.23116:196 281.24939:63 325.04364:1 327.23251:2 391.2186:2 397.03107:2 405.78323:1 417.7829:2 434.26022:2 452.2587:3 452.28571:3 460.26971:4 460.91473:1 462.30014:4 478.25998:2 478.29083:10 480.30801:24 577.0224:2 643.46863:1 645.47815:2 671.47748:2 714.23999:3 715.55286:3 716.52698:3…	TRUE	TRUE	FALSE	FALSE	FALSE	FALSE	2746.62	2021.69	2654.56	2678.25	2998.69	1414.81	1509.25	1507.88	1119.25	1746.12	1076.62	1201.94	1704.25	1198.69	1472.88	855.75	908.75	1152.75	699.125	988.5	0.0002933	0.000183	1.2e-05	0.422617	0.0026887	0.0167428
Phospholipid	PC	34:1	16:0	18:1		PC 16:0-18:1	C42H82NO8P	WTJKGGKOPKCXLL-MRCUWXFGNA-N	CCCCCCCCCCCCCCCC(=O)OCC(COP([O-])(=O)OCC[N+](C)(C)C)OC(=O)CCCCCCC\C=C/CCCCCCCC	9.9259	818.591	[M+Hac-H]-	28203	78.95789:24 124.99644:4 151.94028:2 152.9926:8 162.05705:4 168.04247:108 205.04036:2 206.05588:8 210.13893:4 212.84137:4 224.06871:133 237.21822:6 239.68686:2 242.07605:14 245.44437:2 253.20863:12 253.21088:27 255.2334:2638 256.233:4 263.23221:4 280.36972:31 281.24692:8539 282.24402:10 283.26901:14 309.27399:4 383.78262:2 391.22363:18 406.27164:10 409.23483:6 416.81375:4 432.27701:8 462.29016:90 …	TRUE	TRUE	FALSE	FALSE	FALSE	FALSE	38759.2	40934.1	40732.4	40424.1	49380.6	25881.1	23213.9	27070.2	21889.8	31394.4	20625.8	21767.8	29791.8	24292.6	26429.8	19033.4	22445.5	21719.6	18791.6	19486.8	0.000196	0.0001124	4.8e-06	0.590645	0.0151319	0.0451897
Phospholipid	PC	34:2	16:0	18:2		PC 16:0-18:2	C42H80NO8P	JLPULHDHAOZNQI-AKMCNLDWNA-N	CCCCCCCCCCCCCCCC(=O)OCC(COP([O-])(=O)OCC[N+](C)(C)C)OC(=O)CCCCCCC\C=C/C\C=C/CCCCC	9.35215	816.576	[M+Hac-H]-	55036	78.95932:46 168.0463:178 206.05403:20 224.06677:245 242.08279:41 254.43169:41 255.23131:4092 256.23767:20 261.22849:25 278.36288:51 279.17096:16 279.23224:13018 280.23285:25 281.24945:46 303.23438:15 391.21259:36 406.28027:15 409.22635:15 462.29022:158 480.26691:21 480.3071:693 485.49451:10 486.29074:87 504.30859:87 671.45361:31 697.45135:10 740.16779:31 740.24457:20 742.53436:7075 743.52283:41 7…	TRUE	FALSE	FALSE	FALSE	FALSE	TRUE	70169.4	61581.1	57666.8	72690.6	79301.4	32905.2	31816.1	34098.8	37196.9	36327.7	52157.6	48313.4	60622.1	57363.9	63331.8	61874.4	62865.8	61411.2	54595.8	64439.4	0.0006137	0.0365013	0.125769	6.98e-05	9e-07	0.184284
Phospholipid	PC	34:3	16:0	18:3		PC 16:0-18:3	C42H78NO8P	JMAYDGBZRHQJAT-XSMZTDTHNA-N	CCCCCCCCCCCCCCCC(=O)OCC(COP([O-])(=O)OCC[N+](C)(C)C)OC(=O)CCCCCCC\C=C/C\C=C/C\C=C/CC	9.02183	814.557	[M+Hac-H]-	878	124.99991:1 168.04071:10 175.62918:1 224.06421:9 233.2274:6 242.07784:4 253.20815:3 253.22835:4 255.23289:198 259.2066:4 275.20477:2 276.36465:4 277.2168:513 279.22906:19 281.24387:4 283.26593:4 284.80685:2 388.93692:1 462.29102:10 480.30783:45 481.31955:2 484.28036:8 502.28329:9 519.03845:2 563.00079:2 669.44019:2 738.17224:4 740.44733:5 740.51257:380 740.69305:3 741.51508:3 755.47369:5 814.5495…	TRUE	FALSE	FALSE	FALSE	FALSE	TRUE	1164.81	1371.12	1163.75	1584.75	1576.44	1344.31	1578.94	1278.5	1363.94	1464.19	80.6875	543.25	708.062	707.312	836.812	512	99.25	81.1875	67.75	39.3125	0.759917	0.0011483	1.31e-05	0.0003856	2e-06	0.0310749
Phospholipid	PC	36:3	16:0	20:3		PC 16:0-20:3	C44H82NO8P	FHYXYDNOQOCPNC-XSMZTDTHNA-N	CCCCCCCCCCCCCCCC(=O)OCC(COP([O-])(=O)OCC[N+](C)(C)C)OC(=O)CCCCCCCCC\C=C/C\C=C/C\C=C/CC	9.59965	842.585	[M+Hac-H]-	2847	168.03278:31 168.04192:61 224.06393:82 255.23283:1270 261.26199:31 277.21924:61 279.23154:184 281.25348:82 304.29605:57 305.24936:3928 462.2836:51 462.30182:61 480.30966:317 512.30237:41 530.31702:61 697.47351:41 768.50281:161 768.55371:2978 783.51367:41 842.58246:292	TRUE	FALSE	FALSE	FALSE	FALSE	TRUE	8291	6582.56	7048.12	7953.12	11375	463.312	492.625	468.188	441.5	1315.5	825.312	567.688	842.812	783.5	497.75	811.125	811.438	2403.25	2537.12	2420.06	0.0006111	0.0008028	0.0001204	0.724927	0.0291018	0.0522906
Phospholipid	PC	36:4	16:0	20:4		PC 16:0-20:4	C44H80NO8P	JAVWFBAAZSHHAD-KKILVFCFNA-N	CCCCCCCCCCCCCCCC(=O)OCC(COP([O-])(=O)OCC[N+](C)(C)C)OC(=O)CCCCCC\C=C/C\C=C/C\C=C/C\C=C/CC	9.30254	840.574	[M+Hac-H]-	22401	168.04427:143 205.19772:122 224.06831:153 255.23051:2066 259.24283:383 285.22119:31 285.95801:10 303.23322:5497 462.29691:112 480.30145:564 510.29636:61 528.30505:92 766.52771:4293 781.49951:94 840.57098:348	TRUE	FALSE	TRUE	FALSE	FALSE	TRUE	16216.1	19138	16423.4	18790.1	24820.8	61054.9	58671.2	63895.1	61547	61486.6	6728.31	5197.44	5693	6775.69	5433.88	3365.31	3329.56	3286.81	2998.88	3168.69	0	0.0008038	0.0005132	0	2e-07	0.0008954
Phospholipid	PC	36:5	16:0	20:5		PC 16:0-20:5	C44H78NO8P	KLTHQSWIRFFBRI-KOQZQRJKNA-N	CCCCCCCCCCCCCCCC(=O)OCC(COP([O-])(=O)OCC[N+](C)(C)C)OC(=O)CCC\C=C/C\C=C/C\C=C/C\C=C/C\C=C/CC	8.91765	838.552	[M+Hac-H]-	8342	78.96027:46 151.14813:25 168.04422:184 177.09442:31 203.17969:189 221.15715:5 223.17406:46 224.06657:224 229.19208:25 242.07823:25 254.43378:36 255.23116:3896 257.23001:998 283.19067:10 283.20493:36 300.26852:25 301.17386:19 301.21552:7679 302.22284:32 391.22659:41 406.26328:15 462.29041:138 480.31042:870 508.27429:87 526.29626:82 693.46307:25 762.06714:25 762.09827:36 764.51917:6380 765.51825:51…	TRUE	FALSE	FALSE	TRUE	FALSE	TRUE	1479.06	1146.12	1317.12	1104.12	1074.19	95.875	72.1875	42.8125	209.688	68.875	24887.6	22985.8	37144.9	26100.6	19107.5	5441.94	6920.75	5813.06	5779.75	6047.94	7e-07	0.0011849	1.39e-05	0.0010037	1.55e-05	0.0025712
Phospholipid	PC	36:5	16:0	20:5		PC 16:0-20:5	C44H78NO8P	KLTHQSWIRFFBRI-KOQZQRJKNA-N	CCCCCCCCCCCCCCCC(=O)OCC(COP([O-])(=O)OCC[N+](C)(C)C)OC(=O)CCC\C=C/C\C=C/C\C=C/C\C=C/C\C=C/CC	8.92056	838.561	[M+Hac-H]-	9674	78.95736:41 91.05615:5 115.77064:5 121.1018:15 135.1154:20 137.13699:5 149.13861:15 151.15109:15 152.99551:20 163.14861:15 168.04187:199 177.09203:36 187.91409:5 199.63483:5 203.18318:178 217.12326:25 221.16501:5 223.16719:51 224.06815:255 229.1958:25 242.07988:36 254.43999:27 255.23285:4261 257.21588:339 257.22946:1168 279.03119:5 283.19012:15 283.19724:41 299.20776:15 300.26553:25 301.21738:841…	TRUE	FALSE	FALSE	TRUE	FALSE	TRUE	1396.88	954.312	1191	862.062	1358.5	100.688	38.375	45.5625	174.25	71.875	30109.4	28933.6	39816.9	23518	28168.7	7067.38	8172.94	7181	6923.94	7395.94	0.0003723	0.0004059	0	0.0003573	4.1e-06	0.0009949
Phospholipid	PC	38:5	16:0	22:5		PC 16:0-22:5	C46H82NO8P	ARDJUHDXABDVFH-BPFCGSCHNA-N	CCCCCCCCCCCCCCCC(=O)OCC(COP([O-])(=O)OCC[N+](C)(C)C)OC(=O)CCCCC\C=C/C\C=C/C\C=C/C\C=C/C\C=C/CC	9.41281	866.589	[M+Hac-H]-	4839	168.04019:36 207.45335:5 224.06619:71 231.20619:20 255.22852:744 259.24539:15 281.24893:92 285.2551:148 301.21512:5 303.23392:173 309.20667:5 328.19748:15 329.24377:1891 462.29614:46 480.30392:184 506.32584:31 536.30988:25 554.31293:20 721.5271:15 792.55328:2251 793.56256:20 807.49939:36 863.82916:5 866.57672:215	TRUE	FALSE	FALSE	FALSE	FALSE	TRUE	4066.69	3454.06	4151.25	4217	6513	6581.69	4823.69	6839.12	6008.06	6983.75	6391.25	7832.88	8279.12	7110.38	8031.12	1196.69	1049.69	1078.31	1100.38	1067.25	0.0274544	0.0012762	0.0029732	0.0398218	0.0001875	4.52e-05
Phospholipid	PC	38:6	16:0	22:6		PC 16:0-22:6	C46H80NO8P	IESVDEZGAHUQJU-SYGPSSPWNA-N	CCCCCCCCCCCCCCCC(=O)OCC(COP([O-])(=O)OCC[N+](C)(C)C)OC(=O)CC\C=C/C\C=C/C\C=C/C\C=C/C\C=C/C\C=C/CC	9.21432	864.574	[M+Hac-H]-	30389	78.96114:51 104.06166:10 117.07082:31 133.10394:41 133.81137:10 151.14417:10 166.09589:10 168.04187:173 177.16338:41 189.17343:31 191.18347:102 224.07024:245 229.19577:265 235.17488:10 241.19154:31 249.19385:82 255.11786:23 255.23282:3489 256.23465:31 281.22269:41 281.26529:10 283.23993:1897 297.23645:31 309.21387:41 326.19876:33 327.22147:2284 327.23169:5028 328.23044:31 391.21475:31 462.30185:1…	TRUE	FALSE	FALSE	FALSE	TRUE	TRUE	22997.2	21797.2	23138.7	24086.4	37237.9	22989.1	19544.9	19665.3	24992.2	21620.6	26927.8	24367.6	30858.9	32342.4	35576.2	42927.8	42228.4	43351.9	46193.8	44926.4	0.216772	0.266723	0.0024527	0.0060856	1e-07	0.0001693
Phospholipid	PC	34:3	16:1	18:2		PC 16:1-18:2	C42H78NO8P	QJWDAOSZZYVBJZ-BOAYSYCPNA-N	CCCCCC\C=C/CCCCCCCC(=O)OCC(COP([O-])(=O)OCC[N+](C)(C)C)OC(=O)CCCCCCC\C=C/C\C=C/CCCCC	8.81423	814.557	[M+Hac-H]-	1110	118.96667:2 168.04344:4 224.06367:10 252.41814:4 253.21458:149 255.23938:4 278.34314:4 278.36197:4 279.23135:429 303.21631:4 389.19952:4 458.93747:2 460.28055:10 478.28336:22 486.30902:6 504.31143:6 677.90424:2 740.44464:6 740.52142:292 755.49438:6 812.93341:2 814.5434:18 814.59576:10	FALSE	TRUE	FALSE	FALSE	FALSE	TRUE	1786.69	1232.44	2032.19	1676.06	2668.88	906.75	902.875	857	911	1171.19	965.375	653.812	1166	1059.44	776.438	540.375	805.688	685.062	731.062	664.438	0.0152558	0.0055235	0.0064268	0.820173	0.0058944	0.0486562
Phospholipid	PC	35:2	17:0	18:2		PC 17:0-18:2	C43H82NO8P	ZSKWZJYUVZYDQU-DYMXKLMANA-N	CCCCCCCCCCCCCCCCC(=O)OCC(COP([O-])(=O)OCC[N+](C)(C)C)OC(=O)CCCCCCC\C=C/C\C=C/CCCCC	9.75248	830.586	[M+Hac-H]-	743	168.04182:20 220.1358:5 224.07861:20 255.23723:15 267.23914:15 269.24738:240 279.23141:663 281.24863:20 293.24088:20 451.03979:5 476.30716:10 486.31497:15 494.31961:61 502.92422:5 722.77759:5 748.51337:15 756.55664:667 830.57574:66	TRUE	FALSE	FALSE	FALSE	FALSE	TRUE	981.812	1006.81	856.938	1172.25	1330.94	599.438	495.438	460.312	659.938	474.062	720.312	566.875	771.562	625.5	545.188	727.625	727.375	633.438	800.062	708.25	0.00039	0.0018834	0.0036947	0.102504	0.0049601	0.188707
Phospholipid	PC	37:4	17:0	20:4		PC 17:0-20:4	C45H82NO8P	HTEFXTFZCGTMAC-PHEBCRHUNA-N	CCCCCCCCCCCCCCCCC(=O)OCC(COP([O-])(=O)OCC[N+](C)(C)C)OC(=O)CCCCCC\C=C/C\C=C/C\C=C/C\C=C/CC	9.70652	854.587	[M+Hac-H]-	413	164.65555:5 224.06425:20 259.21823:10 259.23413:51 269.24313:250 303.23148:646 396.86429:5 476.30429:15 492.74625:5 494.31668:76 506.00165:5 780.54614:680 795.49841:25 854.57172:51 854.59644:51	TRUE	FALSE	TRUE	FALSE	FALSE	TRUE	216.188	271.438	237.375	313.375	469.875	1558.5	1016.06	1045.25	1236.12	1145.75	119.812	111.188	103.188	115.125	74.5	40	41	43.125	56.9375	36.0625	3.19e-05	0.0111284	0.0045072	0.0003378	0.0002865	0.0001158
Phospholipid	PC	36:1	18:0	18:1		PC 18:0-18:1	C44H86NO8P	ATHVAWFAEPLPPQ-LNVKXUELNA-N	CCCCCCCCCCCCCCCCCC(=O)OCC(COP([O-])(=O)OCC[N+](C)(C)C)OC(=O)CCCCCCC\C=C/CCCCCCCC	10.9947	846.62	[M+Hac-H]-	3078	78.95592:6 141.05069:2 152.9901:4 168.04536:20 224.07013:27 239.12289:2 253.21919:2 255.23499:16 281.24866:1393 282.26001:6 283.26364:474 289.2341:4 296.13788:2 309.27341:31 311.2941:4 419.25983:8 434.96515:4 480.29141:4 488.30267:8 490.32208:18 506.29715:4 506.31937:14 508.33432:90 534.36078:4 624.93323:4 701.50836:4 770.16705:8 772.58112:1017 773.55402:10 787.53253:10 787.56024:10 846.61859:104	TRUE	TRUE	FALSE	FALSE	FALSE	FALSE	4080.12	6814.69	4426.06	5800.5	5456	2646.31	2297.06	2868.12	2158.81	2473.94	2421.81	2374.25	3510.62	2331.62	2536.25	1689.56	2116	1808	1856.12	1886.69	0.0034982	0.0010836	0.0019466	0.581954	0.0026049	0.0232366
Phospholipid	PC	36:2	18:0	18:2		PC 18:0-18:2	C44H84NO8P	FORFDCPQKJHEBF-IUFKAHDJNA-N	CCCCCCCCCCCCCCCCCC(=O)OCC(COP([O-])(=O)OCC[N+](C)(C)C)OC(=O)CCCCCCC\C=C/C\C=C/CCCCC	10.2197	844.605	[M+Hac-H]-	22109	72.18117:5 78.95763:25 168.04417:138 222.14453:5 224.06874:127 242.07832:20 261.21249:10 278.36292:31 279.23227:8890 281.24475:31 283.26447:3055 307.26016:36 419.24924:36 486.28845:76 490.33249:97 504.29681:61 508.33853:491 696.26862:5 699.50409:25 768.12952:31 770.57172:5579 771.56689:41 785.53546:82 844.58478:547	TRUE	FALSE	FALSE	FALSE	FALSE	TRUE	30363.6	34157.1	26621.9	34009.1	37276.5	11448.4	11569.6	11877.8	11261.5	12038.1	21715.4	18739	24940.4	20613.3	22676.3	22358.6	26671.5	20796.8	20953.7	22100.2	0.0003207	0.0009138	0.0015888	0.0005332	0.0004457	0.588026
Phospholipid	PC	38:3	18:0	20:3		PC 18:0-20:3	C46H86NO8P	LLUINWFQEIMZRU-JOIBFBEQNA-N	CCCCCCCCCCCCCCCCCC(=O)OCC(COP([O-])(=O)OCC[N+](C)(C)C)OC(=O)CCCCCCCCC\C=C/C\C=C/C\C=C/CC	10.5797	870.619	[M+Hac-H]-	1271	168.03638:10 224.07187:37 283.2579:415 305.24564:1277 490.33105:24 506.35376:3 508.33694:78 509.38412:3 512.30853:17 530.32312:17 794.05212:10 796.58289:1010 797.60266:14 811.56256:17 870.61871:119	TRUE	FALSE	FALSE	FALSE	FALSE	TRUE	2995.06	3537.69	2727.06	3602.12	3270.06	453.688	317.875	444.625	358	373.25	793.125	607.812	810.75	840	553.625	639	860.875	695.312	803.875	737.188	4.94e-05	5e-07	6.2e-05	0.0008376	6.23e-05	0.719236
Phospholipid	PC	38:4	18:0	20:4		PC 18:0-20:4	C46H84NO8P	HAKKEJDMTIQLJH-WKUHSSGJNA-N	CCCCCCCCCCCCCCCCCC(=O)OCC(COP([O-])(=O)OCC[N+](C)(C)C)OC(=O)CCCCCC\C=C/C\C=C/C\C=C/C\C=C/CC	10.1704	868.606	[M+Hac-H]-	12746	165.16785:3 168.0381:31 205.19327:14 224.06805:31 259.24289:75 283.26367:414 303.22876:934 490.31577:14 508.33426:116 510.28943:10 528.30469:17 721.67871:3 792.07275:7 794.57648:1047 795.56317:10 809.54553:17 868.59247:82	TRUE	FALSE	TRUE	FALSE	FALSE	TRUE	7149.44	12974.9	7513.31	11762.1	15146.4	39319.2	31035.1	37329.3	35223.8	35565.7	2918.56	2369.12	3241.38	3251.62	3007.12	985.812	1739.69	1321.25	1580.69	1476.38	2.2e-06	0.0067257	0.0035719	1.51e-05	1.34e-05	7.13e-05
Phospholipid	PC	38:5	18:0	20:5		PC 18:0-20:5	C46H82NO8P	ZMNDHWFRGYCJKG-AASFMASFNA-N	CCCCCCCCCCCCCCCCCC(=O)OCC(COP([O-])(=O)OCC[N+](C)(C)C)OC(=O)CCC\C=C/C\C=C/C\C=C/C\C=C/C\C=C/CC	9.64451	866.59	[M+Hac-H]-	3449	166.48926:10 168.03673:51 203.17749:71 224.0685:71 229.19188:20 257.22757:329 282.37186:22 283.26407:1319 301.21774:2010 329.24139:31 490.32538:92 508.28357:41 508.33765:282 526.28955:41 792.55316:2494 803.19464:10 807.51923:61 866.58899:248	TRUE	FALSE	FALSE	TRUE	FALSE	TRUE	784.688	1171.06	633.625	790.25	1147.5	2700.81	2323.25	2883.81	2809.06	3120.88	8160.44	8242.25	10407.5	7343.56	7378.88	1615.12	2042.5	1861.19	1789.12	1766.5	4.1e-06	0.0001293	0.0001015	0.0003803	0.0002022	0.0002708
Phospholipid	PC	40:5	18:0	22:5		PC 18:0-22:5	C48H86NO8P	MAAMGQXOTCBPFS-CYDMDVBXNA-N	CCCCCCCCCCCCCCCCCC(=O)OCC(COP([O-])(=O)OCC[N+](C)(C)C)OC(=O)CCCCC\C=C/C\C=C/C\C=C/C\C=C/C\C=C/CC	10.6568	894.617	[M+Hac-H]-	305	168.04021:10 223.02817:5 224.07034:15 231.21468:25 283.2637:153 285.25964:71 329.2486:268 488.94772:3 490.32462:13 508.33685:66 820.58148:444 835.5191:13 894.61523:51	TRUE	FALSE	FALSE	FALSE	FALSE	TRUE	162.312	259.938	140.5	234.938	214.188	800.625	772.562	1052.62	969.25	1020.19	82	75	86	88.1875	68.5	13.5	22.25	8.5	12.5	24.75	2.6e-06	0.0048406	0.0009932	0.00012	9.1e-05	9e-07
Phospholipid	PC	40:5	18:0	22:5		PC 18:0-22:5	C48H86NO8P	MAAMGQXOTCBPFS-CYDMDVBXNA-N	CCCCCCCCCCCCCCCCCC(=O)OCC(COP([O-])(=O)OCC[N+](C)(C)C)OC(=O)CCCCC\C=C/C\C=C/C\C=C/C\C=C/C\C=C/CC	10.2982	894.621	[M+Hac-H]-	847	163.07675:7 168.04027:14 221.15256:3 224.06406:24 231.20616:20 283.26138:214 285.25494:48 303.21161:7 303.22882:24 329.24609:547 488.78867:3 490.32153:14 508.34006:54 536.29932:14 554.33533:10 820.57343:722 821.57208:10 835.52313:17 835.57617:10 894.61102:75	TRUE	FALSE	FALSE	FALSE	FALSE	TRUE	480.688	544.562	408.75	474.25	641.5	601.312	501.312	637.312	489.688	818.688	1631.94	1637.56	3060.12	1750.44	1971.62	194.062	257.75	281.375	275.5	273.938	0.199239	0.0046904	0.000335	0.0055381	0.0029927	0.0028282
Phospholipid	PC	40:6	18:0	22:6		PC 18:0-22:6	C48H84NO8P	FAUYAENFVCNTAL-UFTZFNJNNA-N	CCCCCCCCCCCCCCCCCC(=O)OCC(COP([O-])(=O)OCC[N+](C)(C)C)OC(=O)CC\C=C/C\C=C/C\C=C/C\C=C/C\C=C/C\C=C/CC	10.0296	892.606	[M+Hac-H]-	6796	78.95994:20 131.27092:5 135.12047:15 168.04208:71 177.16924:25 191.18373:25 224.06845:61 229.19824:112 233.42795:5 247.18028:5 249.17641:25 283.26175:1266 309.2243:15 323.38177:5 326.2095:21 327.23221:1714 328.23099:15 419.26331:20 490.33209:71 506.7551:5 508.33496:365 534.2995:36 552.31213:31 815.95056:15 818.56848:3091 819.58203:36 833.54077:46 892.60205:299	TRUE	FALSE	FALSE	FALSE	TRUE	TRUE	4129.56	7432.69	3631.12	6095.81	6784	5358.88	4688.44	4955.12	5919	5479.81	5722.25	5344.19	6720.06	6877.06	8268.06	8454.81	10886.6	8931.06	8794.12	11452.2	0.684661	0.312664	0.0027861	0.0460223	0.0001315	0.0044298
Phospholipid	PC	36:3	18:1	18:2		PC 18:1-18:2	C44H82NO8P	GDWULUGDXGHJIJ-RWLIYIGXNA-N	CCCCCCCC\C=C/CCCCCCCC(=O)OCC(COP([O-])(=O)OCC[N+](C)(C)C)OC(=O)CCCCCCC\C=C/C\C=C/CCCCC	9.44765	842.591	[M+Hac-H]-	5193	168.04204:92 217.07353:10 224.06621:61 255.23528:51 278.35767:54 279.23172:5746 280.35989:42 281.24655:2256 293.48285:10 303.23636:41 417.24286:31 486.28745:41 488.29956:112 504.31161:82 506.32254:334 766.11523:31 768.50336:78 768.5542:3718 769.552:31 783.50635:51 842.51752:20 842.56665:219 842.59943:284	FALSE	TRUE	FALSE	FALSE	FALSE	TRUE	10323.8	8334.06	10630.4	10362.2	13018.4	1718.75	1307.88	1723	1255.12	1412.44	5461.94	4776.5	5142.38	3903.56	2776.44	4803.19	4561.56	4408.38	4243.25	3700.75	0.000222	0.0001261	0.0007744	0.0031485	8e-07	0.897917
Phospholipid	PC	38:4	18:1	20:3		PC 18:1-20:3	C46H84NO8P	JNKAOGSDBBXHEP-SAUDALOUNA-N	CCCCCCCC\C=C/CCCCCCCC(=O)OCC(COP([O-])(=O)OCC[N+](C)(C)C)OC(=O)CCCCCCCCC\C=C/C\C=C/C\C=C/CC	9.69137	868.603	[M+Hac-H]-	842	216.99577:5 224.0674:25 279.23026:41 281.24744:163 303.23218:5 305.24536:406 307.26273:10 330.2641:10 506.31537:46 794.56482:364 868.55884:20 868.6004:41	FALSE	TRUE	FALSE	FALSE	FALSE	TRUE	1374.44	944	1342.25	1013.12	1546	472.125	389.812	462.625	433.5	578.75	1368.31	1249.75	1666.88	1025.69	1072.31	369.25	439.062	361.375	364.812	368.625	0.0016983	0.845772	0.0014903	0.0014945	0.0364856	0.0013403
Phospholipid	PC	40:7	18:1	22:6		PC 18:1-22:6	C48H82NO8P	FPEVDFOXMCHLKL-MIIHFGKENA-N	CCCCCCCC\C=C/CCCCCCCC(=O)OCC(COP([O-])(=O)OCC[N+](C)(C)C)OC(=O)CC\C=C/C\C=C/C\C=C/C\C=C/C\C=C/C\C=C/CC	9.27982	890.584	[M+Hac-H]-	1388	168.0433:15 219.13544:5 224.06297:15 229.19907:25 281.24719:235 283.24316:117 303.23438:20 327.23477:337 488.30792:15 500.17441:5 506.32455:76 552.30652:10 816.54572:614 817.56207:15 831.49945:15 890.57745:61	FALSE	TRUE	FALSE	FALSE	TRUE	TRUE	1833.69	1924.94	1899.5	1454.44	2267.62	789.5	574.312	717.75	873.188	812.562	1538.94	1349.56	1459.25	1387.88	659	1380.12	1842.19	1587.19	1818.62	1594.06	4.15e-05	0.0193318	0.173658	0.0134393	1.91e-05	0.0764866
Phospholipid	PC	40:7	18:1	22:6		PC 18:1-22:6	C48H82NO8P	FPEVDFOXMCHLKL-MIIHFGKENA-N	CCCCCCCC\C=C/CCCCCCCC(=O)OCC(COP([O-])(=O)OCC[N+](C)(C)C)OC(=O)CC\C=C/C\C=C/C\C=C/C\C=C/C\C=C/C\C=C/CC	9.27681	890.592	[M+Hac-H]-	1480	78.95898:3 107.08914:2 117.06662:2 117.07425:1 123.11823:1 133.09782:4 135.98483:1 147.1212:3 152.99593:2 158.09912:1 163.14542:3 168.04594:8 175.14688:2 177.16568:4 191.1683:4 203.17957:2 224.07068:15 229.19835:18 241.18979:2 249.18538:7 279.61877:2 281.2468:220 282.25101:3 283.24039:117 297.24176:1 307.26224:2 309.20935:3 326.20175:3 327.2168:87 327.23212:309 417.23438:4 432.27988:2 463.93286:2…	FALSE	TRUE	FALSE	FALSE	TRUE	TRUE	2002.12	1823.62	1557.88	1074	2498.81	801.625	602.312	778.312	740.125	883.438	1728.75	1288.31	1539.62	1447.38	1039	1683.56	2385.5	1934.25	1923.06	1859.38	0.010937	0.184301	0.546036	0.000863	1.17e-05	0.0103431
Phospholipid	PC	36:4	18:2	18:2		PC 18:2-18:2	C44H80NO8P	FVXDQWZBHIXIEJ-ZPPAUJSGNA-N	CCCCC\C=C/C\C=C/CCCCCCCC(=O)OCC(COP([O-])(=O)OCC[N+](C)(C)C)OC(=O)CCCCCCC\C=C/C\C=C/CCCCC	8.96221	840.573	[M+Hac-H]-	3242	78.95841:14 168.04524:51 224.06781:58 253.21896:48 255.22122:10 255.2325:17 278.35477:17 279.23355:3358 280.22943:10 281.24603:37 301.2121:20 302.21942:17 303.22598:14 305.24655:95 482.29672:10 485.15176:3 486.30548:44 504.31415:143 764.0929:20 766.47394:17 766.54034:1870 767.51733:7 767.5564:10 781.4848:20 840.57257:156	FALSE	FALSE	FALSE	FALSE	FALSE	TRUE	4044.56	3231.38	3591.19	3813.44	4723.69	1006.06	979.625	890.562	1026.5	759.812	5235.25	4604.62	6287.44	4482.25	4954.88	2991.81	3266.88	3056.75	2946.62	2941.06	0.0002081	0.0164951	0.0261968	0.0001619	0	0.0025407
Phospholipid	PC	38:6	18:2	20:4		PC 18:2-20:4	C46H80NO8P	RUHBZJXWUDKAMZ-ODAJXHQSNA-N	CCCCC\C=C/C\C=C/CCCCCCCC(=O)OCC(COP([O-])(=O)OCC[N+](C)(C)C)OC(=O)CCCCCC\C=C/C\C=C/C\C=C/C\C=C/CC	8.94168	864.572	[M+Hac-H]-	1584	164.94382:5 168.03337:15 168.03886:20 205.20004:15 223.01392:3 224.06874:20 255.23564:5 259.2435:54 279.23206:453 301.21295:5 302.2865:8 303.22928:786 486.29358:20 502.72839:3 504.29562:74 510.29572:10 528.30127:13 788.0025:8 790.53955:844 805.48663:13 864.57446:79	FALSE	FALSE	TRUE	FALSE	FALSE	TRUE	1527.75	1004.69	1835.81	1503.56	2801.81	2330.81	2049.12	2203.25	2681.75	1577.5	2151.62	2208.19	2901.31	1635.12	1178.44	362.375	483.562	305.062	513.312	416.188	0.248804	0.519714	0.0109918	0.665422	0.0004541	0.0049538
Phospholipid	PC	38:7	18:2	20:5		PC 18:2-20:5	C46H78NO8P	HRBNRYBXXRPMKP-OMCHRGCMNA-N	CCCCC\C=C/C\C=C/CCCCCCCC(=O)OCC(COP([O-])(=O)OCC[N+](C)(C)C)OC(=O)CCC\C=C/C\C=C/C\C=C/C\C=C/C\C=C/CC	8.60234	862.559	[M+Hac-H]-	814	78.95636:6 100.02553:2 118.97183:1 135.34868:1 163.15431:2 168.04582:15 177.09607:2 203.17944:18 215.71205:1 223.16747:5 224.06844:20 228.1463:1 229.19182:2 242.07138:2 242.08017:3 245.16122:2 257.22522:86 271.20078:2 275.91019:1 277.21719:4 279.23419:453 281.24667:2 283.207:6 300.27802:3 301.21277:413 302.21762:3 303.22662:8 403.18307:1 415.22784:3 428.84253:1 435.76022:2 452.26376:2 467.40085:1…	FALSE	FALSE	FALSE	TRUE	FALSE	TRUE	857.812	96	865.875	630.25	1573	513.062	116.562	520.75	530.562	799.312	1141.38	869.75	1384.94	1112.38	864.625	1001.69	1026.69	388.375	880.562	1112.25	0.271936	0.323555	0.782109	0.0041609	0.0516159	0.266362
Phospholipid	PC	40:8	20:4	20:4		PC 20:4-20:4	C48H80NO8P	BFCSBEFTXQRIOJ-QIURYZFVNA-N	CC\C=C/C\C=C/C\C=C/C\C=C/CCCCCCC(=O)OCC(COP([O-])(=O)OCC[N+](C)(C)C)OC(=O)CCCCCC\C=C/C\C=C/C\C=C/C\C=C/CC	8.86612	888.571	[M+Hac-H]-	943	203.18771:5 205.19185:15 224.07919:15 259.23883:56 279.22488:25 303.23407:735 327.22949:46 500.15005:5 504.30188:20 510.29245:15 528.28174:51 528.30444:76 814.42944:11 814.52612:553 826.50171:5 886.59387:5 888.55701:76	FALSE	FALSE	TRUE	FALSE	FALSE	TRUE	1048.19	534.812	1056.94	696.438	1718.62	1366.75	790.938	1113.38	1152.38	880	779.062	729.688	990.5	893.125	816.625	696.625	847.812	781.938	975	984.625	0.832982	0.459247	0.50178	0.087072	0.119109	0.835872
Phospholipid	PE	34:2	16:0	18:2		PE 16:0-18:2	C39H74NO8P	HBZNVZIRJWODIB-BCTRXSSUNA-N	CCCCCCCCCCCCCCCC(=O)OCC(COP(O)(=O)OCCN)OC(=O)CCCCCCC\C=C/C\C=C/CCCCC	9.4873	714.505	[M-H]-	853	116.95129:10 196.03343:20 255.22856:235 279.23395:710 452.27402:61 458.27118:31 714.50897:163	TRUE	FALSE	FALSE	FALSE	FALSE	TRUE	974.5	1674.38	910.688	1631.44	1571.62	687.75	764.125	417.5	500.75	540.062	743.125	611.188	819.062	749.188	1086.31	725.375	686.938	859.312	500.062	616.25	0.0026771	0.018081	0.0054005	0.0610465	0.302638	0.243374
Phospholipid	PE	36:4	16:0	20:4		PE 16:0-20:4	C41H74NO8P	NQIMLWFRWGTTOZ-JAXHXWBXNA-N	CCCCCCCCCCCCCCCC(=O)OCC(COP(O)(=O)OCCN)OC(=O)CCCCCC\C=C/C\C=C/C\C=C/C\C=C/CC	9.43942	738.502	[M-H]-	1017	140.0106:14 196.03487:10 246.98486:3 255.2352:160 259.2453:51 285.22638:3 303.23132:381 434.26498:17 441.40689:3 452.2695:44 738.46051:27 738.4989:139	TRUE	FALSE	TRUE	FALSE	FALSE	TRUE	1466	1949	1568.06	2105.25	2225.62	2084	1874.56	1373.25	1421.94	1654.06	286	418.188	241.25	293.188	302.188	266.625	211.875	222.875	200.688	178.375	0.392637	0.0003438	0.0003473	0.0003566	0.000365	0.023161
Phospholipid	PE	36:5	16:0	20:5		PE 16:0-20:5	C41H72NO8P	KHLRCNXJXSYNCK-LPHKCNJWNA-N	CCCCCCCCCCCCCCCC(=O)OCC(COP(O)(=O)OCCN)OC(=O)CCC\C=C/C\C=C/C\C=C/C\C=C/C\C=C/CC	9.02583	736.491	[M-H]-	302	245.15918:10 255.22878:204 257.2186:41 257.22537:51 270.92911:10 301.21533:267 430.09991:10 452.26077:41 736.48334:143	TRUE	FALSE	FALSE	TRUE	FALSE	TRUE	54.25	37	46.5	50.25	66.5625	12.5	5.25	11.25	7.75	9	796.375	819.625	1130.75	677.938	966.125	223.312	324.875	318.812	233.75	253.688	0.0006317	0.0004334	0.0003358	0.0003689	0.0002474	0.0009521
Phospholipid	PE	38:6	16:0	22:6		PE 16:0-22:6	C43H74NO8P	MPWUZHVZZKSTPV-LGFBOSHVNA-N	CCCCCCCCCCCCCCCC(=O)OCC(COP(O)(=O)OCCN)OC(=O)CC\C=C/C\C=C/C\C=C/C\C=C/C\C=C/C\C=C/CC	9.33219	762.505	[M-H]-	2608	78.96001:7 89.08913:1 91.0536:2 107.08451:3 117.06942:1 121.09728:2 133.10081:2 135.12045:3 140.01228:14 145.10493:1 149.1353:2 153.08641:2 163.07666:2 163.14153:3 177.1635:7 189.16385:2 191.18361:5 196.03487:13 203.17525:2 214.04684:6 217.19821:2 229.19589:17 238.72835:1 247.17339:1 249.1806:5 255.23293:288 283.24478:125 295.19666:1 309.22141:3 327.23178:259 328.23309:3 378.23526:2 434.26495:14 …	TRUE	FALSE	FALSE	FALSE	TRUE	TRUE	2307.81	3438.38	2414.38	2817.06	4089.5	2125.12	2095.31	1642.69	2091.31	2032.25	1788.06	1725.81	2381.31	2375.25	3748.69	2856.38	3419.75	3638.81	2411.38	2754.94	0.0360876	0.252307	0.994575	0.333013	0.0029586	0.190082
Phospholipid	PE	36:2	18:0	18:2		PE 18:0-18:2	C41H78NO8P	YDTWOEYVDRKKCR-MLWYYCKJNA-N	CCCCCCCCCCCCCCCCCC(=O)OCC(COP(O)(=O)OCCN)OC(=O)CCCCCCC\C=C/C\C=C/CCCCC	10.3901	742.536	[M-H]-	817	140.01132:10 190.95001:3 196.03331:18 278.35507:8 279.23148:719 283.26123:275 300.99429:3 434.9371:5 458.27106:10 462.27899:13 474.98541:3 476.26553:10 480.29556:28 742.52606:241	TRUE	FALSE	FALSE	FALSE	FALSE	TRUE	1001.06	1565.62	909.312	1595.44	1385.94	459.062	588	327.688	310.625	343.438	720	619.438	1080.81	679.875	897.125	885.5	803.625	881.812	629.25	655.438	0.0003925	0.0178479	0.009276	0.0041263	0.0013238	0.785021
Phospholipid	PE	38:4	18:0	20:4		PE 18:0-20:4	C43H78NO8P	YEHAZLUVAZKVRO-ZKVKLVECNA-N	CCCCCCCCCCCCCCCCCC(=O)OCC(COP(O)(=O)OCCN)OC(=O)CCCCCC\C=C/C\C=C/C\C=C/C\C=C/CC	10.3402	766.534	[M-H]-	1614	123.07626:5 140.00616:15 196.03938:41 259.24359:61 283.26434:418 299.00095:5 303.23184:653 305.01584:15 462.27197:10 462.29926:20 480.31015:56 482.25409:15 500.27658:10 766.53668:382	TRUE	FALSE	TRUE	FALSE	FALSE	TRUE	1620	2703	1464.38	2739.75	3184.31	3661	3827.44	2857.44	3016.81	2986.31	462.438	404.5	623.812	562.375	689.125	260.375	350.062	382.375	269.375	222.812	0.0453763	0.0055781	0.0036465	8.04e-05	8.8e-05	0.0029737
Phospholipid	PE	38:5	18:0	20:5		PE 18:0-20:5	C43H76NO8P	MOJMRZJNAPRFBD-GLWDABGQNA-N	CCCCCCCCCCCCCCCCCC(=O)OCC(COP(O)(=O)OCCN)OC(=O)CCC\C=C/C\C=C/C\C=C/C\C=C/C\C=C/CC	9.76195	764.524	[M-H]-	453	135.11589:5 196.03925:25 223.16774:10 235.03052:5 257.21872:82 283.26431:317 301.21796:366 462.28131:10 462.29953:25 475.8801:5 480.29495:51 480.33206:25 764.51135:234	TRUE	FALSE	FALSE	TRUE	FALSE	TRUE	75.3125	156.75	95.3125	109.938	112.438	260.312	324.312	193.062	206.312	245.875	1097.12	966.438	1310.69	989.125	1357.62	284.188	367.125	342.25	281.938	282.312	0.0009502	0.0001657	1.91e-05	0.0001917	0.0558785	0.0003402
Phospholipid	PE	40:6	18:0	22:6		PE 18:0-22:6	C45H78NO8P	XYYHNDVKALDFHQ-HSBBONCLNA-N	CCCCCCCCCCCCCCCCCC(=O)OCC(COP(O)(=O)OCCN)OC(=O)CC\C=C/C\C=C/C\C=C/C\C=C/C\C=C/C\C=C/CC	10.1929	790.54	[M-H]-	833	135.12738:5 140.01601:20 196.03957:20 207.14128:5 249.18617:15 263.00406:5 283.26041:235 327.21814:56 327.23599:184 462.3046:15 480.31879:46 790.54126:227	TRUE	FALSE	FALSE	FALSE	TRUE	TRUE	476	813.062	345	578.188	930	542.062	772.438	330.688	482.188	688.312	669.125	608.625	746.562	725.5	1410.19	1336.81	1598.31	1385.19	978.688	1235.19	0.635549	0.295174	0.0017671	0.14357	0.000391	0.0285131
Phospholipid	PE	38:5	18:1	20:4		PE 18:1-20:4	C43H76NO8P	ZYMZKMQPPJPQHY-HAGCXRLMNA-N	CCCCCCCC\C=C/CCCCCCCC(=O)OCC(COP(O)(=O)OCCN)OC(=O)CCCCCC\C=C/C\C=C/C\C=C/C\C=C/CC	9.5372	764.519	[M-H]-	795	127.00101:10 196.04465:31 246.90053:10 255.23512:20 259.23843:20 281.25116:163 300.98724:10 303.23129:225 329.24106:51 473.40491:10 478.29886:41 607.93903:10 738.8634:10 764.5108:247	FALSE	TRUE	TRUE	FALSE	FALSE	TRUE	1055.06	1065.88	1058.88	1291.62	1778.31	1308.75	1023.44	1011.81	863.438	1198.31	614.062	650	879.125	689.188	792.625	134.812	123.438	147.125	115.125	97.4375	0.321507	0.0074868	0.0012482	0.0046821	0.0002236	0.0001867
Phospholipid	PG	31:1	17:0	14:1		PG 17:0-14:1	C37H71O10P	CCMFBKQDCGRHJC-BENRWUELNA-N	CCCCCCCCCCCCCCCCC(=O)OCC(COP(O)(=O)OCC(O)CO)OC(=O)CCCCCCC\C=C/CCCC	8.11066	705.469	[M-H]-	5052	78.95911:39 96.9675:4 134.98312:4 152.99606:129 168.0406:4 171.00386:57 207.46594:2 209.02158:20 224.48076:16 225.18529:2653 227.03116:27 228.83334:4 244.22563:4 245.0444:8 268.41287:6 269.24802:1174 269.32443:4 358.29236:2 361.16925:14 379.18582:4 403.73309:4 405.23712:78 414.00983:4 423.23926:8 435.21567:24 453.23065:20 479.27792:57 481.43338:6 483.44165:4 495.72043:4 497.27985:110 627.48242:8 …	TRUE	TRUE	FALSE	FALSE	FALSE	FALSE	5504.62	3785.75	5487.25	4543.5	5767.19	5263.31	4146.44	4793.81	5126.19	5738	4884.44	4275.75	5498.81	5005.69	4872.12	5970	5673.94	4878.19	4595.62	5231.12	0.993028	0.799316	0.589512	0.754903	0.502483	0.287473
Phospholipid	PI	34:2	16:0	18:2		PI 16:0-18:2	C43H79O13P	BSNJSZUDOMPYIR-BCTRXSSUNA-N	CCCCCCCCCCCCCCCC(=O)OCC(COP(O)(=O)OC1C(O)C(O)C(O)C(O)C1O)OC(=O)CCCCCCC\C=C/C\C=C/CCCCC	8.32039	833.517	[M-H]-	2109	78.95866:31 96.96841:17 152.99725:54 223.00064:71 241.01184:330 255.23051:492 259.01801:37 279.23383:592 295.60873:3 297.03452:68 304.78845:3 315.03949:31 391.22302:235 409.23135:24 415.21875:31 553.27631:170 571.2796:54 577.27466:41 595.27899:10 830.85223:14 833.45728:28 833.51428:2835	TRUE	FALSE	FALSE	FALSE	FALSE	TRUE	1687.44	1842.56	2079.25	2291.81	2583.06	1734.31	1295.81	1330.88	1996.75	1666.19	2187.69	2053.94	2399.31	2118.19	2850	2140.12	2289.06	2793.19	2056.81	2792.31	0.0442422	0.325592	0.19585	0.0062532	0.0043737	0.677942
Phospholipid	PI	36:4	16:0	20:4		PI 16:0-20:4	C45H79O13P	VWRYMIZQLPXULA-JAXHXWBXNA-N	CCCCCCCCCCCCCCCC(=O)OCC(COP(O)(=O)OC1C(O)C(O)C(O)C(O)C1O)OC(=O)CCCCCC\C=C/C\C=C/C\C=C/C\C=C/CC	8.30962	857.515	[M-H]-	4624	78.95756:14 152.99231:41 205.19371:10 222.99895:54 241.01448:187 255.23323:252 257.22079:3 259.01846:31 259.24335:24 297.03992:54 303.23416:263 312.59549:3 315.05008:34 389.99393:7 391.22372:105 409.23495:14 433.24878:3 439.22537:20 546.64282:3 553.28064:156 571.29077:48 601.27142:34 619.28864:10 857.51288:1742	TRUE	FALSE	TRUE	FALSE	FALSE	TRUE	5079.94	6024.69	6213.44	6907.25	7849.38	8421.62	6777.06	7356.56	7929.56	8962.38	2384.44	2148.44	3187.69	2233.69	2770.19	1414.62	1740.25	1873.12	1428.38	1769.94	0.0398137	5.61e-05	0.0003576	1.6e-06	4.29e-05	0.0030231
Phospholipid	PI	36:5	16:0	20:5		PI 16:0-20:5	C45H77O13P	FQGSWQFJOVVRRB-LPHKCNJWNA-N	CCCCCCCCCCCCCCCC(=O)OCC(COP(O)(=O)OC1C(O)C(O)C(O)C(O)C1O)OC(=O)CCC\C=C/C\C=C/C\C=C/C\C=C/C\C=C/CC	8.09628	855.499	[M-H]-	689	74.4839:2 78.95741:27 94.99042:2 96.96854:8 126.99658:4 151.14992:4 152.99432:51 175.1416:2 203.18011:14 223.00182:80 225.18376:12 229.1927:4 232.65555:2 241.011:294 242.03944:2 251.05411:2 255.23198:390 257.22861:65 259.02179:31 269.25131:6 283.21075:6 297.04126:53 301.21674:306 315.04654:27 391.18674:6 391.22861:169 409.23434:20 437.20749:31 446.34775:2 479.27481:4 497.22961:4 535.25537:2 553.2…	TRUE	FALSE	FALSE	TRUE	FALSE	TRUE	93.125	69.75	87.25	99.5	88.25	72.75	54.75	69.5	71.875	73.25	1732.56	1666.94	2575.38	1424.25	2172.5	724.625	631.812	752.938	567.438	758.938	0.0133449	0.0008681	7.41e-05	0.0008358	7.22e-05	0.0033631
Phospholipid	PI	38:6	16:0	22:6		PI 16:0-22:6	C47H79O13P	FPHAZHKZJQOPBU-LGFBOSHVNA-N	CCCCCCCCCCCCCCCC(=O)OCC(COP(O)(=O)OC1C(O)C(O)C(O)C(O)C1O)OC(=O)CC\C=C/C\C=C/C\C=C/C\C=C/C\C=C/C\C=C/CC	8.26186	881.519	[M-H]-	781	76.88494:1 78.95872:15 92.9279:1 96.96712:3 107.0816:2 152.994:20 175.15234:2 177.16931:3 191.1799:2 222.99896:30 229.18979:8 241.01233:115 249.19655:2 252.80453:1 255.21075:6 255.23555:145 259.02307:13 279.2132:2 283.23813:53 294.97171:1 297.03275:30 315.0477:17 327.2298:105 389.99414:2 390.01086:1 391.22397:93 409.24377:7 461.21741:1 463.22256:12 479.9985:2 487.3374:2 496.01953:2 497.23959:2 55…	TRUE	FALSE	FALSE	FALSE	TRUE	TRUE	359.188	213.312	318.875	219.625	487.062	274.812	266.312	188.812	370.125	253.75	712.062	570.5	783.75	713.625	627.75	1813.19	1684	1813.69	1695.69	2261.5	0.425883	0.0004166	1.1e-06	2.37e-05	5.21e-05	6e-06
Phospholipid	PI	36:2	18:0	18:2		PI 18:0-18:2	C45H83O13P	KZVRAFHIKMDULK-MLWYYCKJNA-N	CCCCCCCCCCCCCCCCCC(=O)OCC(COP(O)(=O)OC1C(O)C(O)C(O)C(O)C1O)OC(=O)CCCCCCC\C=C/C\C=C/CCCCC	8.75847	861.543	[M-H]-	2080	223.00104:31 241.00787:163 259.02295:51 279.22949:194 283.25452:194 297.03247:41 297.05679:10 419.26276:133 577.26129:31 581.30261:102 595.29297:31 599.29999:31 861.55286:1079	TRUE	FALSE	FALSE	FALSE	FALSE	TRUE	2183.12	2014.94	2272.19	2932	2841.12	1685.31	1957.75	1353.81	1546.25	1415.94	2069.06	1766.88	2874.44	2311.69	1977.31	1661.94	2258.56	1592	2516	2378.38	0.0038537	0.374399	0.202684	0.0237714	0.0555168	0.671048
Phospholipid	PI	36:2	18:0	18:2		PI 18:0-18:2	C45H83O13P	KZVRAFHIKMDULK-MLWYYCKJNA-N	CCCCCCCCCCCCCCCCCC(=O)OCC(COP(O)(=O)OC1C(O)C(O)C(O)C(O)C1O)OC(=O)CCCCCCC\C=C/C\C=C/CCCCC	8.75799	861.554	[M-H]-	2042	78.95754:27 96.97134:17 152.99573:41 222.99881:68 238.06837:3 241.00996:238 259.02286:27 279.23178:340 283.26398:366 297.03485:54 315.04486:24 415.22784:34 419.25421:177 437.2637:17 577.27869:34 581.31317:163 588.89355:3 599.31079:44 861.54962:2208	TRUE	FALSE	FALSE	FALSE	FALSE	TRUE	1950.81	1760.88	1651.88	1833.69	3226.06	1455.62	1763.19	1658.06	1427.81	1434	1947.38	1843	3174.12	2176.62	2577.94	1886.31	2627.88	1888.62	2171.38	2386.44	0.138162	0.51223	0.748082	0.0280525	0.0037208	0.60566
Phospholipid	PI	38:3	18:0	20:3		PI 18:0-20:3	C47H85O13P	GGSSNEAFVQRIHU-JTBMWNAQNA-N	CCCCCCCCCCCCCCCCCC(=O)OCC(COP(O)(=O)OC1C(O)C(O)C(O)C(O)C1O)OC(=O)CCCCCCCCC\C=C/C\C=C/C\C=C/CC	8.94281	887.556	[M-H]-	1098	134.97324:3 152.99776:24 222.98433:7 223.00119:37 236.07208:3 241.01241:102 250.99065:3 259.0072:10 283.26419:184 284.27676:3 297.03995:27 305.24985:184 307.27963:3 417.9668:3 419.24857:65 424.81693:3 437.25201:10 441.23239:10 581.30975:58 594.83209:3 599.31073:20 603.26892:14 616.46814:3 887.49829:122 887.56555:1017	TRUE	FALSE	FALSE	FALSE	FALSE	TRUE	1586	1167.31	1954.69	1794	2212.06	185.375	25.25	34	210	190.938	1320.12	1155.75	1762	1768.12	740.812	857.25	938.25	1060.12	1608.81	1398.62	0.0005454	0.172249	0.0363534	0.0026761	0.0012129	0.484442
Phospholipid	PI	38:3	18:0	20:3		PI 18:0-20:3	C47H85O13P	GGSSNEAFVQRIHU-JTBMWNAQNA-N	CCCCCCCCCCCCCCCCCC(=O)OCC(COP(O)(=O)OC1C(O)C(O)C(O)C(O)C1O)OC(=O)CCCCCCCCC\C=C/C\C=C/C\C=C/CC	8.9421	887.566	[M-H]-	1274	78.96091:24 96.96954:14 152.99876:41 223.00044:71 241.00949:235 259.0224:31 282.36179:10 283.25876:356 297.01736:7 297.03195:37 305.24918:309 315.05441:24 419.25381:156 437.25739:14 441.24075:24 581.30267:143 599.31738:34 603.28601:41 621.29797:10 884.76007:14 887.49023:20 887.56171:2380	TRUE	FALSE	FALSE	FALSE	FALSE	TRUE	1954.62	979.188	1838.38	1405.94	2933.94	216.25	153.938	204.875	149.688	232.125	1585	1451.44	1966.88	1960.69	1434.5	1205.81	1266.12	1289.69	1626.31	1627.75	0.0074819	0.692395	0.276053	0.0001935	0.0001414	0.103567
Phospholipid	PI	38:4	18:0	20:4		PI 18:0-20:4	C47H83O13P	OJESNYFIPWSOPO-ZKVKLVECNA-N	CCCCCCCCCCCCCCCCCC(=O)OCC(COP(O)(=O)OC1C(O)C(O)C(O)C(O)C1O)OC(=O)CCCCCC\C=C/C\C=C/C\C=C/C\C=C/CC	8.73641	885.549	[M-H]-	19974	78.9594:155 96.97058:41 147.98206:10 152.99638:377 171.00787:31 205.19221:62 221.2666:10 222.99945:472 240.99524:178 241.01277:2046 259.01892:255 259.24152:173 283.26453:3298 297.03543:385 303.23206:2675 312.78296:10 315.05042:133 419.25461:1335 437.26404:133 439.21652:163 579.54559:10 581.30988:1484 597.44702:10 599.26941:72 599.32123:401 601.26752:261 619.29163:41 723.48383:41 882.6958:41 882.7…	TRUE	FALSE	TRUE	FALSE	FALSE	TRUE	20957.6	22148.5	22529	26474.2	34373.1	30394.9	28418.2	33675.1	31239.9	33401.9	11750.3	9815.62	18425.4	15969.3	16633.2	6654.44	9169.88	8222.31	9344.12	9892.38	0.0487075	0.0062421	0.0018781	1.87e-05	0	0.0088242
Phospholipid	PI	38:5	18:0	20:5		PI 18:0-20:5	C47H81O13P	SUYDNPBYMBTSMM-GLWDABGQNA-N	CCCCCCCCCCCCCCCCCC(=O)OCC(COP(O)(=O)OC1C(O)C(O)C(O)C(O)C1O)OC(=O)CCC\C=C/C\C=C/C\C=C/C\C=C/C\C=C/CC	8.48249	883.534	[M-H]-	2718	78.95999:22 96.97001:6 107.092:2 135.11594:4 152.99271:39 171.85028:2 203.17827:10 217.12451:2 223.0041:61 241.01338:208 252.41545:2 257.22882:57 259.02197:29 283.25845:313 284.26389:4 297.01471:4 297.04877:27 301.21695:171 310.37335:2 315.05179:20 418.01862:2 419.26004:126 437.19601:8 437.20486:22 437.27863:16 489.25784:4 581.30756:126 599.26721:27 599.30176:27 599.32251:53 601.11316:4 617.26868…	TRUE	FALSE	FALSE	TRUE	FALSE	TRUE	42.25	35.75	72.75	64.5625	88.5	21.625	14.6875	23.8125	16.375	22	7557.25	6439.62	9850.19	6949.75	10638.5	2201.56	2204.88	2320.5	2612.5	3184.31	0.0124962	0.0005753	0.000187	0.0005649	0.0001799	0.0016998
Phospholipid	PI	40:5	18:0	22:5		PI 18:0-22:5	C49H85O13P	QLABQLNIHHHJCI-NIZIMQIGNA-N	CCCCCCCCCCCCCCCCCC(=O)OCC(COP(O)(=O)OC1C(O)C(O)C(O)C(O)C1O)OC(=O)CCCCC\C=C/C\C=C/C\C=C/C\C=C/C\C=C/CC	8.80318	911.565	[M-H]-	438	78.95391:2 78.95767:9 82.07467:1 96.97009:5 131.04489:1 149.41133:1 152.99411:16 222.9968:24 230.1113:1 241.01224:117 251.21182:2 255.36618:1 257.22525:2 259.02292:11 283.26404:167 284.26468:2 285.25757:12 297.03491:19 315.04489:7 321.03369:1 328.22565:2 329.24643:117 330.79208:1 353.13742:1 414.52655:1 419.25131:65 437.26364:6 464.23367:2 465.23138:12 524.75616:2 571.23279:1 579.49097:2 581.3062…	TRUE	FALSE	FALSE	FALSE	FALSE	TRUE	133.375	88.5625	151	146.625	239.062	115.188	91.875	115.125	108.875	176.188	1056.75	1040	2080.31	1270.62	1365.19	78.1875	146.125	103.125	89.6875	155.75	0.31693	0.0028628	0.235123	0.0027507	0.752503	0.0026819
Phospholipid	PI	40:6	18:0	22:6		PI 18:0-22:6	C49H83O13P	DJVOKHFQPGWUPK-HSBBONCLNA-N	CCCCCCCCCCCCCCCCCC(=O)OCC(COP(O)(=O)OC1C(O)C(O)C(O)C(O)C1O)OC(=O)CC\C=C/C\C=C/C\C=C/C\C=C/C\C=C/C\C=C/CC	8.67615	909.55	[M-H]-	2228	78.9586:38 96.96977:10 107.0844:3 119.08244:2 121.10495:4 127.07897:1 133.10074:3 134.98756:4 135.11711:2 137.13707:1 147.11403:2 149.1387:3 151.16161:1 152.99387:71 163.06764:3 163.14693:3 171.01082:3 175.14287:3 177.16353:5 189.16002:2 191.17586:5 201.16507:2 204.99352:3 215.17351:2 217.19626:2 223.00093:99 227.17758:2 229.19391:33 241.01219:401 248.80008:2 249.18748:8 255.21512:3 259.02066:42 …	TRUE	FALSE	FALSE	FALSE	TRUE	TRUE	448.062	306.438	528.625	414.75	759.562	395	427.312	330.688	533.062	571.562	2053.75	1283.62	2271	1970.12	1332.88	5276.25	5638.62	6095.75	6634.62	7292.44	0.66163	0.0003097	5.49e-05	0.0020708	7.41e-05	4.9e-06
Phospholipid	PI	36:3	18:1	18:2		PI 18:1-18:2	C45H81O13P	MXJMOLQIXMJUEL-RQOIEFAZNA-N	CCCCCCCC\C=C/CCCCCCCC(=O)OCC(COP(O)(=O)OC1C(O)C(O)C(O)C(O)C1O)OC(=O)CCCCCCC\C=C/C\C=C/CCCCC	8.39637	859.531	[M-H]-	913	152.9942:27 222.99483:24 241.00798:102 243.00766:3 259.02081:10 279.22964:112 281.24448:122 293.13031:3 297.03506:14 303.23169:10 415.2251:20 417.2373:65 435.23917:7 577.25494:10 577.27533:17 579.29419:58 597.28491:20 835.56934:3 859.4303:7 859.53369:750	FALSE	TRUE	FALSE	FALSE	FALSE	TRUE	1052	805.125	1184.81	942.375	1360	1037.81	875	1102.69	820.562	1371.5	849.562	835.125	1055.62	714.5	749.688	672.562	698.562	662.062	725.812	752.312	0.846315	0.0779835	0.0176974	0.116361	0.0240631	0.0787743
Phospholipid	PI	38:5	18:1	20:4		PI 18:1-20:4	C47H81O13P	XGZVRASBCZTHNO-HAGCXRLMNA-N	CCCCCCCC\C=C/CCCCCCCC(=O)OCC(COP(O)(=O)OC1C(O)C(O)C(O)C(O)C1O)OC(=O)CCCCCC\C=C/C\C=C/C\C=C/C\C=C/CC	8.36122	883.529	[M-H]-	2683	83.42989:5 143.94125:5 152.99211:31 222.99654:56 241.01198:296 250.95668:5 255.23064:25 259.02042:20 281.24643:392 297.03223:61 303.22885:345 315.04715:20 329.25128:36 417.23691:194 418.24915:5 435.25644:15 439.2218:20 579.29382:173 597.29834:66 601.27063:56 880.74768:20 883.4549:20 883.53455:2526	FALSE	TRUE	TRUE	FALSE	FALSE	TRUE	1482.06	1016.31	2360.5	1599.06	2430.06	1552.75	759.062	1936.88	1765.56	1410	4721.62	5523.19	6932.19	5388	7030.31	1327.56	1523.25	609.625	2293.31	2005	0.411593	5.11e-05	0.585398	2e-05	0.855035	4.03e-05
Sphingomyelin	SM	d30:1	d18:1	12:0		SM d18:1/12:0	C35H71N2O6P	HZCLJRFPXMKWHR-BYCLXTJYNA-N	CCCCCCCCCCCCC\C=C\C(O)C(COP([O-])(=O)OCC[N+](C)(C)C)NC(=O)CCCCCCCCCCC	8.01435	705.515	[M+Hac-H]-	2292	78.95911:182 88.87249:2 106.38935:2 107.59049:4 122.98344:10 167.52632:6 168.04538:433 188.94029:2 272.99149:4 369.32645:4 382.64734:4 430.2782:2 449.29156:14 542.40039:8 555.30859:2 560.40753:12 586.41211:8 627.51581:14 629.47546:16 629.55688:4 631.41339:16 631.47369:3025 631.64386:6 632.4704:16 645.5174:18 646.42468:10 646.44623:20 705.51361:33	TRUE	FALSE	FALSE	FALSE	FALSE	FALSE	2176.06	1997.75	2401.06	2090.69	2446.56	2449.25	1828.38	2291.62	2579.12	2339.25	2258	2189.94	2276.75	2592.62	2043.69	2223.19	2489.38	2582.5	2274.56	2306.12	0.63957	0.701578	0.205913	0.874982	0.606004	0.389345
Sphingomyelin	SM	d34:1	d18:1	16:0		SM d18:1/16:0	C39H79N2O6P	RWKUXQNLWDTSLO-NHQGMKOONA-N	CCCCCCCCCCCCCCCC(=O)NC(COP([O-])(=O)OCC[N+](C)(C)C)C(O)\C=C\CCCCCCCCCCCCC	9.02381	761.579	[M+Hac-H]-	3539	78.95965:219 122.98927:21 168.0417:463 449.31586:31 616.47552:36 642.48346:15 685.36084:25 687.49384:29 687.54565:4722 688.53015:20 697.88074:5 702.4881:36 715.56287:15 761.56891:76	TRUE	FALSE	FALSE	FALSE	FALSE	FALSE	3432.56	4180.94	4027.31	4111.81	4599.12	4162.19	3496.81	4055.5	3568.75	3967.81	2964.56	3007.31	3859.75	3279	3034.75	2745.69	3219.25	2841.44	2687	3534.94	0.366874	0.0100413	0.0026027	0.0197501	0.0037991	0.364289
Sphingomyelin	SM	d40:1	d18:1	22:0		SM d18:1/22:0	C45H91N2O6P	FJJANLYCZUNFSE-BSKJHSHCNA-N	CCCCCCCCCCCCCCCCCCCCCC(=O)NC(COP([O-])(=O)OCC[N+](C)(C)C)C(O)\C=C\CCCCCCCCCCCCC	12.2098	845.673	[M+Hac-H]-	1134	78.95713:61 122.98325:7 168.04037:136 449.32141:10 686.28534:3 700.54187:10 771.63776:1951 786.59601:20 845.68481:68	TRUE	FALSE	FALSE	FALSE	FALSE	FALSE	867.25	634	726.938	1262.38	1330.25	1373.62	1276.38	1569.12	1357.19	1400.69	864.5	818.812	1304.06	1161.94	1574	816.375	1086.44	1156.56	866.938	1223.81	0.0200606	0.390979	0.695465	0.129786	0.0045276	0.498793
Sphingomyelin	SM	d42:1	d18:1	24:0		SM d18:1/24:0	C47H95N2O6P	QEDPUVGSSDPBMD-OGSMZCTINA-N	CCCCCCCCCCCCCCCCCCCCCCCC(=O)NC(COP([O-])(=O)OCC[N+](C)(C)C)C(O)\C=C\CCCCCCCCCCCCC	13.0671	873.698	[M+Hac-H]-	2994	78.95802:78 96.96906:2 122.98705:16 137.37242:2 141.01639:5 168.04256:284 223.02029:2 249.14104:2 289.79892:1 305.05273:2 325.82733:1 367.35492:4 411.02356:2 427.00955:2 431.29175:3 437.35815:2 440.2518:2 442.45126:2 444.70386:2 445.1741:2 449.30093:16 451.60385:2 460.15067:2 463.00934:3 471.0441:2 477.53403:2 481.60349:2 491.6571:2 510.67838:2 516.37946:2 703.88641:1 710.58441:5 728.5932:17 736.…	TRUE	FALSE	FALSE	FALSE	FALSE	FALSE	2020.06	2911.06	2196.12	4053.38	3605.06	3417.5	2957.19	4143.94	3905.75	3454.31	2398.69	2237.56	3611.19	3040.25	2955.62	2429	2731.88	2601	2577.81	2628.25	0.200643	0.820627	0.408554	0.0532491	0.007631	0.361884
Sphingomyelin	SM	d42:1	d18:1	24:0		SM d18:1/24:0	C47H95N2O6P	QEDPUVGSSDPBMD-OGSMZCTINA-N	CCCCCCCCCCCCCCCCCCCCCCCC(=O)NC(COP([O-])(=O)OCC[N+](C)(C)C)C(O)\C=C\CCCCCCCCCCCCC	13.0697	873.706	[M+Hac-H]-	3174	78.95883:76 168.0423:194 449.30475:15 713.58362:5 799.60138:35 799.66522:3146 800.65509:15 814.61749:31 873.70404:133	TRUE	FALSE	FALSE	FALSE	FALSE	FALSE	2024.25	2545.44	1844.31	3126.81	4016.94	3578.19	2958.56	4339	3895.56	3705.81	2610.25	2793.06	3675.56	2892.81	4274.06	2949.75	3302.81	3186.88	2444.81	3307.56	0.0625362	0.318307	0.466418	0.28147	0.0451603	0.567531
Sphingomyelin	SM	d42:2	d18:1	24:1		SM d18:1/24:1	C47H93N2O6P	SUTDVWUQTJGTCQ-IMMYYDDQNA-N	CCCCCCCCCCCCC\C=C\C(O)C(COP([O-])(=O)OCC[N+](C)(C)C)NC(=O)CCCCCCCCC\C=C/CCCCCCCCCCCC	12.22	871.689	[M+Hac-H]-	1403	78.95872:53 118.96854:2 127.00262:2 168.04369:165 438.58578:4 449.31213:12 585.37097:2 708.56537:4 725.49939:2 726.57916:12 752.57928:8 795.10791:10 795.74463:4 797.5766:27 797.65234:2564 798.64093:12 800.91541:4 812.58179:16 812.6059:27 871.68726:92	FALSE	TRUE	FALSE	FALSE	FALSE	FALSE	1430.69	2182.12	1675.81	2223.19	2420.69	1457.44	1014.06	1263.69	1279.12	1567	1195.81	1161.12	1466.06	1186	1040.69	791.375	1242.81	1032.94	1112.75	1319.44	0.0122398	0.0044304	0.0026733	0.391584	0.138895	0.367671
Glycerolipid	TAG	48:1	14:0	16:0	18:1	TAG 14:0-16:0-18:1	C51H96O6	UPTISBGEYYYCRS-QOCHGBHMNA-N	CCCCCCCCCCCCCCCC(=O)OC(COC(=O)CCCCCCCCCCCCC)COC(=O)CCCCCCCCC\C=C/CCCCCC	14.4292	822.752	[M+NH4]+	4269	79.05979:10 81.0721:61 83.0814:41 85.10098:51 93.07167:10 95.08466:112 97.1011:41 107.08714:10 109.09966:82 113.13136:10 123.11311:31 135.12088:10 203.19756:10 211.20088:41 237.21928:61 239.2336:92 247.24509:41 256.26862:31 265.25623:61 311.27182:20 313.27884:51 321.27539:10 327.22021:51 521.46661:63 523.4693:699 547.7843:22 549.48956:1923 550.46893:35 550.51526:51 551.5022:629 563.5047:31 575.70…	TRUE	TRUE	FALSE	FALSE	FALSE	FALSE	9075.5	7977.12	4626	8510.12	6919.25	3184.06	5436.69	1134.56	1526.81	4773.81	2570.62	2473	2636.88	4183.88	6396.75	3703.88	4785.81	2518.88	1184.94	1761	0.0066423	0.0085371	0.0019037	0.708721	0.705785	0.413383
Glycerolipid	TAG	48:3	14:0	16:1	18:2	TAG 14:0-16:1-18:2	C51H92O6	GNSSLMOBGUWUHC-BBYZJILNNA-N	CCCCCCCCCCCCCC(=O)OCC(COC(=O)CCCCCCCC\C=C/C=C\CCCCC)OC(=O)CCCCC\C=C/CCCCCCCC	13.9317	818.717	[M+NH4]+	1433	81.06725:41 83.08549:41 95.08491:61 109.09843:41 115.11359:10 121.09601:31 211.1971:31 211.20529:31 219.21077:31 237.21744:41 261.2323:10 263.2337:51 268.99213:31 307.2626:10 319.27094:41 519.44238:112 521.45087:382 522.45007:20 545.45917:122 545.75903:21 547.4743:586 547.52716:21 565.47949:10 572.03064:21 573.48254:325 575.5014:102 601.51215:71 801.70819:31 818.6994:61 818.73975:41	TRUE	TRUE	FALSE	FALSE	FALSE	TRUE	2799.38	1906.44	1562.25	2966.19	3709.38	1253.5	1601.69	566.312	435.25	983.625	697.75	731.125	864.438	1114.75	3289.56	657.375	1324.19	741.562	632.75	819.062	0.0062678	0.0808404	0.002516	0.509475	0.608839	0.371569
Glycerolipid	TAG	48:3	14:0	16:1	18:2	TAG 14:0-16:1-18:2	C51H92O6	GNSSLMOBGUWUHC-BBYZJILNNA-N	CCCCCCCCCCCCCC(=O)OCC(COC(=O)CCCCCCCC\C=C/C=C\CCCCC)OC(=O)CCCCC\C=C/CCCCCCCC	13.9321	818.727	[M+NH4]+	1396	79.0581:10 81.06911:31 206.98668:10 235.20544:10 249.96852:10 267.01288:10 268.99924:31 292.95801:10 302.96957:10 340.88678:10 508.97034:10 518.06299:10 519.43835:41 521.45325:214 523.47198:20 545.43182:41 545.4549:61 547.47333:163 549.47241:31 573.48822:122 575.50708:71 585.85602:10 601.50745:31 801.71796:10 818.73743:51	TRUE	TRUE	FALSE	FALSE	FALSE	TRUE	2907.5	1792.62	1476.31	2997.31	3717	1389.56	1573.81	559.75	390.312	945.625	684.312	659.312	790.562	1115.5	2966.5	817.688	1259.94	733.312	359.625	779.875	0.0093266	0.0575239	0.0034853	0.598033	0.519555	0.354623
Glycerolipid	TAG	52:7	14:0	18:2	20:5	TAG 14:0-18:2-20:5	C55H92O6	WXFNJBNSRDNXCG-QUWPIPCFNA-N	CCCCCCCCCCCCCC(=O)OCC(COC(=O)CCC\C=C/C\C=C/C\C=C/C\C=C/C\C=C/CC)OC(=O)CCCCCCCC\C=C/C=C\CCCCC	13.7728	866.725	[M+NH4]+	1193	77.04029:10 81.06926:41 107.0999:10 135.11385:20 157.09247:10 171.11635:31 187.14798:31 199.15062:41 201.15865:41 211.20836:31 263.23935:31 267.20978:41 285.2276:51 292.95901:61 337.27158:71 521.45844:41 538.94238:20 545.47345:10 547.46558:376 548.47949:20 569.4566:82 593.52252:10 595.45233:31 599.51489:10 601.49945:41 621.48303:71 845.63483:31 849.68506:31 866.70105:51 866.74255:92	TRUE	FALSE	FALSE	TRUE	FALSE	TRUE	447.25	365.312	233.938	625.562	643.188	531.438	795.188	289.625	453.75	750.062	2759.81	1273.75	2859.75	2512.5	5171	758.25	939	926	534.688	983.562	0.431939	0.0172303	0.012336	0.019586	0.067806	0.0290866
Glycerolipid	TAG	49:2	15:0	16:0	18:2	TAG 15:0-16:0-18:2	C52H96O6	WCCKIJYMDLMPDP-OCGDUTRDNA-N	CCCCCCCCCCCCCCCC(=O)OC(COC(=O)CCCCCCCCCCCCCC)COC(=O)CCCCCCCC\C=C/C=C\CCCCC	14.3231	834.753	[M+NH4]+	1322	81.06944:31 105.71594:10 109.09789:20 151.14102:10 186.99532:41 226.98941:20 240.99664:10 259.24585:10 311.25256:10 351.23032:112 356.07776:10 374.95786:20 535.47412:41 537.48053:163 549.47247:41 549.50885:20 561.47968:184 563.49408:61 572.87347:10 575.49695:214 584.90369:10 717.34296:10 719.57794:367 834.76923:61	TRUE	FALSE	FALSE	FALSE	FALSE	TRUE	1745.38	2071.69	1904.75	1846.88	1459.88	1339.25	1234.31	447.5	747.562	728	1198.62	611	1322.5	1348.69	1340.69	2153.75	2112.12	839.938	978.562	1014	0.0016967	0.0060938	0.247937	0.260959	0.161516	0.454495
Glycerolipid	TAG	53:6	15:0	18:1	20:5	TAG 15:0-18:1-20:5	C56H96O6	NMOBWEQFTALWPI-FUFSZTMTNA-N	CCCCCCCCCCCCCCC(=O)OCC(COC(=O)CCC\C=C/C\C=C/C\C=C/C\C=C/C\C=C/CC)OC(=O)CCCCCCCCC\C=C/CCCCCC	14.1606	882.748	[M+NH4]+	729	97.10149:10 131.08127:10 197.12561:10 264.24808:10 265.26505:20 275.17947:10 285.22571:41 311.23886:10 313.26825:20 561.4848:10 563.50592:122 564.52448:10 577.51099:41 583.46991:31 595.4588:10 597.45734:20 609.46991:20 623.49249:20 800.6817:20 824.97241:10 863.59552:20 863.69916:82 863.76965:20 882.76044:41	TRUE	TRUE	FALSE	TRUE	FALSE	TRUE	150.812	236	75.1875	261.5	281.062	893.875	1435.44	280.25	737.625	882.125	973.5	1056.88	1205.88	1486.69	1212.38	1060.31	869.438	697.562	544.438	235.25	0.0235647	6.8e-06	0.0246183	0.133733	0.499179	0.0158609
Glycerolipid	TAG	51:4	15:0	18:2	18:2	TAG 15:0-18:2-18:2	C54H96O6	DRFFNNCYRJLRRH-HTUQFOBENA-N	CCCCCCCCCCCCCCC(=O)OCC(COC(=O)CCCCCCCC\C=C/C=C\CCCCC)OC(=O)CCCCCCCC\C=C/C=C\CCCCC	14.1264	858.749	[M+NH4]+	1247	79.05253:10 85.10252:20 97.09714:10 104.9923:61 165.15669:10 185.13301:10 186.99594:51 223.16109:10 243.22119:10 261.22675:10 268.99573:31 319.27206:20 325.21365:20 390.99411:31 472.99472:20 538.48639:20 557.47632:10 559.48352:31 561.49097:214 563.50201:41 571.7002:10 573.48615:41 575.505:31 581.52161:10 585.48859:51 587.49084:41 597.21881:10 599.49316:102 601.50879:20 692.44299:10 694.56079:133 …	TRUE	FALSE	FALSE	FALSE	FALSE	TRUE	1500.75	1885.56	1063.06	1785.94	1796	1250.75	1586	533	660.062	933.125	1689.44	743.25	1531.5	1195.81	2063.69	1106.56	1195.88	908.5	860.875	652.688	0.0364352	0.566102	0.0059519	0.164759	0.830251	0.0743541
Glycerolipid	TAG	48:0	16:0	16:0	16:0	TAG 16:0-16:0-16:0	C51H98O6	PVNIQBQSYATKKL-UHFFFAOYSA-N	CCCCCCCCCCCCCCCC(=O)OCC(COC(=O)CCCCCCCCCCCCCCC)OC(=O)CCCCCCCCCCCCCCC	14.7484	824.768	[M+NH4]+	1482	83.08744:20 239.23445:41 397.37433:51 523.47906:43 549.95593:21 551.5022:516 824.75244:20	TRUE	FALSE	FALSE	FALSE	FALSE	FALSE	1776.38	2043.56	1728.19	2301.5	2193.06	1196.19	1563.69	574	707.188	1170.12	1473.56	669.688	1420.44	1425.75	1326.94	2566	2167.62	1344.88	979.062	1004.19	0.0018436	0.0041273	0.277657	0.372526	0.159598	0.353482
Glycerolipid	TAG	50:0	16:0	16:0	18:0	TAG 16:0-16:0-18:0	C53H102O6	DQKMNCLZNGAXNX-UHFFFAOYNA-N	CCCCCCCCCCCCCCCCCC(=O)OCC(COC(=O)CCCCCCCCCCCCCCC)OC(=O)CCCCCCCCCCCCCCC	15.1485	852.798	[M+NH4]+	726	83.08546:20 165.16058:10 186.99049:41 221.22885:10 233.17534:10 239.23801:41 254.97609:10 268.99875:92 290.93979:10 370.94656:10 433.01645:20 524.9483:10 551.50165:205 564.97205:10 579.52844:251 852.80267:20	TRUE	FALSE	FALSE	FALSE	FALSE	FALSE	673.562	1069.44	939.812	954.188	1014.62	651.125	1075.69	318.938	237.875	509.062	743.5	278.188	700	763.688	579.938	1032.75	1219.5	733.75	474.812	559.438	0.0520609	0.0225709	0.443638	0.760813	0.264362	0.286158
Glycerolipid	TAG	50:1	16:0	16:0	18:1	TAG 16:0-16:0-18:1	C53H100O6	ZKEWGTVAIGJNBK-QOCHGBHMNA-N	CCCCCCCCCCCCCCCC(=O)OCC(COC(=O)CCCCCCCCC\C=C/CCCCCC)OC(=O)CCCCCCCCCCCCCCC	14.7826	850.783	[M+NH4]+	13448	81.06804:71 83.08628:71 85.0981:61 95.08707:82 97.09937:51 99.11868:31 107.08234:10 109.10069:82 111.11855:31 121.10143:31 135.11699:31 137.13675:51 157.16827:10 177.17052:10 210.49904:10 237.21571:10 239.24091:275 247.24361:61 257.24823:10 265.25229:102 268.99478:31 313.27682:82 339.30234:41 549.48883:112 549.77661:31 551.50482:2067 552.49927:51 575.73376:31 577.52258:4866 578.50287:61 578.52325…	TRUE	TRUE	FALSE	FALSE	FALSE	FALSE	23354.6	30275.5	13341.4	22889.8	21658.3	11938.9	16431.2	4078.81	6220.94	12033.1	8080.44	5941.06	8839.25	13524.1	19580.8	12601.8	16218.6	8131.94	6629.5	7185.62	0.0083111	0.0156727	0.0059053	0.757555	0.996547	0.742407
Glycerolipid	TAG	48:2	16:0	16:1	16:1	TAG 16:0-16:1-16:1	C51H94O6	UGGMYGFVPCJWRU-CDAVXRBQNA-N	CCCCCCCCCCCCCCCC(=O)OCC(COC(=O)CCCCC\C=C/CCCCCCCC)OC(=O)CCCCC\C=C/CCCCCCCC	14.1666	820.737	[M+NH4]+	4653	71.08295:61 79.05897:10 81.07126:82 82.03704:10 83.08183:31 85.10141:31 93.07348:10 95.08373:102 97.10017:41 101.1057:10 109.10011:71 121.09465:20 121.0993:51 123.11201:51 135.10823:20 135.11314:61 137.12959:41 186.99855:31 211.20337:92 215.1647:10 219.21715:71 226.98886:41 237.2045:20 237.22406:194 239.23621:82 245.23303:10 265.2543:71 268.99683:31 311.25476:41 313.27173:41 521.33459:21 521.4505…	TRUE	TRUE	FALSE	FALSE	FALSE	FALSE	9459.88	7636.88	4688.31	9234.06	9976.81	3492.44	4470.12	1471.56	1482.88	3420.44	2859.75	1451.75	2553.94	6113.88	8673	4472.12	3795.06	3837.62	1884.06	2086.06	0.0015153	0.0465282	0.0018312	0.346428	0.671657	0.458327
Glycerolipid	TAG	50:2	16:0	16:1	18:1	TAG 16:0-16:1-18:1	C53H98O6	URPCLMPOIWCNBL-QSZZZDORNA-N	CCCCCCCCCCCCCCCC(=O)OCC(COC(=O)CCCCCCCCC\C=C/CCCCCC)OC(=O)CCCCC\C=C/CCCCCCCC	14.4792	848.768	[M+NH4]+	44682	71.08488:173 77.03682:25 79.04845:10 79.05473:107 81.07078:481 83.08392:370 85.06709:25 85.10092:178 93.06888:178 95.08596:613 97.10242:333 99.07824:31 107.08559:138 109.10103:391 111.11444:153 113.09225:25 121.10184:351 123.11769:224 125.09022:10 125.13283:82 127.10864:31 135.11418:296 137.13559:138 139.11375:31 139.14703:31 141.12787:20 149.13435:180 151.14491:71 153.12352:56 161.1362:20 163.14…	TRUE	TRUE	FALSE	FALSE	FALSE	FALSE	83435.2	92652.6	51217.1	84779.8	83362.4	38821.6	48627.3	14118.9	16237.1	32560.3	28221.8	23151.3	28204.9	44485.4	65166.2	33999.2	49751.2	28114.8	22801.8	23933.8	0.001021	0.0044647	0.0006126	0.466255	0.846468	0.522159
Glycerolipid	TAG	50:3	16:0	16:1	18:2	TAG 16:0-16:1-18:2	C53H96O6	DQDPOOOZAMWWOY-WTGFFXNQNA-N	CCCCCCCCCCCCCCCC(=O)OCC(COC(=O)CCCCCCCC\C=C/C=C\CCCCC)OC(=O)CCCCC\C=C/CCCCCCCC	14.2127	846.751	[M+NH4]+	30413	71.08649:51 77.04468:10 79.05391:61 81.06995:284 83.08565:143 85.10007:61 93.06525:31 95.08367:261 97.10289:133 107.08899:51 109.10152:259 111.08221:41 111.11642:41 119.08617:51 121.10078:143 123.11663:163 131.07974:10 135.11798:143 137.13445:71 147.11897:41 149.13489:82 151.14891:92 153.12755:71 161.13136:51 163.14526:61 173.13489:10 175.14751:82 177.16238:51 189.16745:71 211.20731:92 219.21071:…	TRUE	TRUE	FALSE	FALSE	FALSE	TRUE	68083.6	50153	27567.1	64925	61516.7	29113.6	35481.4	10056.9	13811.4	26774.6	17053	13275.5	22726.9	30356.6	52027.2	14571.7	24997.4	17734.3	12770.5	15262.6	0.0072774	0.0264145	0.0055109	0.642393	0.287368	0.224991
Glycerolipid	TAG	51:2	16:0	17:1	18:1	TAG 16:0-17:1-18:1	C54H100O6	WHWWSPAFLPLISL-LIZOOBNRNA-N	CCCCCCCCCCCCCCCC(=O)OCC(COC(=O)CCCCCCCCC\C=C/CCCCCC)OC(=O)CCCCC\C=C/CCCCCCCCC	14.6274	862.787	[M+NH4]+	2266	81.06892:41 83.08332:20 85.10032:31 95.08395:61 107.08637:20 117.07201:10 123.11383:20 177.1647:10 186.98923:41 225.21989:31 226.99136:41 251.23738:31 263.22961:20 263.25021:10 265.25241:51 268.99493:61 313.26968:31 424.91449:10 490.93692:10 549.48029:41 561.48096:41 561.74176:21 563.50201:556 565.51331:205 575.48474:112 576.50397:31 577.51392:388 587.68591:20 589.52405:502 590.51788:21 591.53662…	TRUE	TRUE	FALSE	FALSE	FALSE	FALSE	4759.81	4852.38	2751.69	5616.75	4331.81	1703.06	2112.5	730.75	1062.25	1680.75	1506.69	1205	1571.44	1824.31	1372.56	2380.62	2153	1645.69	1048.94	1004.5	0.0005053	0.0027114	0.0009222	0.890381	0.626941	0.627245
Glycerolipid	TAG	51:3	16:0	17:1	18:2	TAG 16:0-17:1-18:2	C54H98O6	LZGIWQXZVKXCKP-KBWLTDIENA-N	CCCCCCCCCCCCCCCC(=O)OCC(COC(=O)CCCCCCCC\C=C/C=C\CCCCC)OC(=O)CCCCC\C=C/CCCCCCCCC	14.3644	860.769	[M+NH4]+	3412	71.08409:31 79.05014:20 79.05767:31 83.08437:41 85.09878:31 91.05506:10 95.08509:71 97.10155:31 99.11809:10 104.99259:102 109.0957:31 111.1165:31 121.10089:31 123.11674:41 135.1132:31 159.11777:10 171.17476:10 186.98717:20 186.99101:71 225.21982:41 233.22125:31 239.23216:41 243.00031:10 245.22231:51 246.23303:10 251.23734:51 261.22589:10 263.23416:112 265.2478:51 292.9729:10 313.27722:31 317.2829…	TRUE	TRUE	FALSE	FALSE	FALSE	TRUE	6103.5	6769.94	3682.69	5752.31	7229.75	3285.88	4602.81	1284.38	2554.5	2841.25	2439.31	1444.62	2689.75	2910.81	3228.38	2672.44	2804.25	2401.12	1732.38	1807.88	0.0062787	0.001161	0.0005293	0.564359	0.309554	0.50919
Glycerolipid	TAG	52:1	16:0	18:0	18:1	TAG 16:0-18:0-18:1	C55H104O6	RBJMAKBTUZSIDN-QOCHGBHMNA-N	CCCCCCCCCCCCCCCCCC(=O)OC(COC(=O)CCCCCCCCCCCCCCC)COC(=O)CCCCCCCCC\C=C/CCCCCC	15.1745	878.808	[M+NH4]+	2513	79.04709:2 81.06685:12 83.08251:10 85.09949:10 93.07009:4 95.08443:22 97.0967:8 107.0927:2 109.10231:16 111.11871:8 121.10005:6 123.11589:12 125.12943:4 128.95384:2 135.12212:4 137.13036:8 141.16782:2 144.98511:2 163.15338:4 172.97804:2 185.20361:2 186.99358:8 221.22585:4 226.97905:4 239.2392:37 247.25076:8 249.25589:4 265.25055:22 267.26495:16 268.98837:4 269.00226:10 293.29211:8 304.96774:4 313…	TRUE	TRUE	FALSE	FALSE	FALSE	FALSE	3251.94	5431.88	2152.25	3871.75	4652.81	2257.5	4366.56	1137.06	1238.94	1780.56	2116.62	945.375	1382.94	2060.5	2825	2529.31	3367	1976.19	1241.31	1679.25	0.0684952	0.0151252	0.0345978	0.677202	0.997226	0.567075
Glycerolipid	TAG	52:1	16:0	18:0	18:1	TAG 16:0-18:0-18:1	C55H104O6	RBJMAKBTUZSIDN-QOCHGBHMNA-N	CCCCCCCCCCCCCCCCCC(=O)OC(COC(=O)CCCCCCCCCCCCCCC)COC(=O)CCCCCCCCC\C=C/CCCCCC	15.17	878.82	[M+NH4]+	2656	79.05201:20 83.08498:20 85.10849:10 95.0843:61 109.10068:31 123.11571:31 226.98927:31 237.22227:10 239.23222:51 258.93689:10 265.25696:71 268.99716:31 540.88446:10 549.47913:71 551.49841:92 575.67645:10 577.50928:668 579.5318:650 580.53076:31 592.97736:10 604.80975:22 605.54553:836 606.54932:51 607.55048:41 633.56787:20 878.80145:82	TRUE	TRUE	FALSE	FALSE	FALSE	FALSE	3349.06	5571.56	2193.44	4185.06	4571.69	2312.31	4657.69	1112.88	1516.12	2510.06	2105.25	1373.5	1810.44	2241.5	3170.5	2695.56	3108.81	1300.12	1295	2049.19	0.101327	0.0214968	0.0238552	0.690853	0.654558	0.917209
Glycerolipid	TAG	52:2	16:0	18:1	18:1	TAG 16:0-18:1-18:1	C55H102O6	NJWLXJXDVKOEOP-IKJQKJQYNA-N	CCCCCCCCCCCCCCCC(=O)OCC(COC(=O)CCCCCCCCC\C=C/CCCCCC)OC(=O)CCCCCCCCC\C=C/CCCCCC	14.8139	876.8	[M+NH4]+	75782	71.08392:241 77.03829:51 79.05497:197 81.06849:622 83.08546:597 85.06344:61 85.09988:314 91.05215:51 93.06779:204 95.0835:1091 97.10132:573 99.07993:61 99.11224:61 107.08589:204 109.10282:587 111.08056:51 111.11625:263 113.09407:42 113.13158:41 121.09907:426 123.11647:399 125.09531:51 125.1316:173 135.1162:570 137.13101:194 139.11247:51 139.14909:41 149.13132:250 151.14705:153 153.12569:82 163.14…	TRUE	TRUE	FALSE	FALSE	FALSE	FALSE	173510	167654	81549.1	178956	212429	55598.1	71299.6	23888.4	32244.3	55961.4	38777.9	36233.8	51589.2	57632.1	87370.6	36311.8	56133.1	37689.2	27415.7	33391.1	0.0011728	0.0017634	0.0037807	0.618583	0.359888	0.157842
Glycerolipid	TAG	52:3	16:0	18:1	18:2	TAG 16:0-18:1-18:2	C55H100O6	PFTMZNUFSPJEJR-KDHVXLOFNA-N	CCCCCCCCCCCCCCCC(=O)OCC(COC(=O)CCCCCCCC\C=C/C=C\CCCCC)OC(=O)CCCCCCCCC\C=C/CCCCCC	14.5286	874.784	[M+NH4]+	167978	71.04955:41 71.08524:391 77.03716:71 79.05382:293 81.06477:139 81.07112:1248 83.04954:62 83.08683:832 85.06351:143 85.10126:359 91.04817:20 91.05221:122 93.07056:395 95.08629:1773 97.0666:102 97.10135:569 99.08137:71 99.11648:102 105.07333:93 107.08588:330 109.06154:64 109.10427:957 111.07905:112 111.11623:253 113.09853:71 113.13155:61 113.82591:10 119.08441:133 121.10365:617 123.11639:762 125.09…	TRUE	TRUE	FALSE	FALSE	FALSE	TRUE	329126	263868	167316	293275	346836	160234	175036	66141.1	105695	137593	121482	98826.8	131507	136170	225103	122735	177004	121296	88601.3	91716.1	0.0036185	0.0070989	0.001963	0.651452	0.739764	0.428756
Glycerolipid	TAG	54:1	16:0	18:1	20:0	TAG 16:0-18:1-20:0	C57H108O6	QKCZWZMHMPYOPG-ATJXCDBQNA-N	CCCCCCCCCCCCCCCCCCCC(=O)OCC(COC(=O)CCCCCCCCCCCCCCC)OC(=O)CCCCCCCCC\C=C/CCCCCC	15.6299	906.842	[M+NH4]+	639	81.07099:20 83.08671:20 99.07849:10 234.90651:10 247.25414:10 265.24719:31 266.98257:10 290.94241:10 303.75571:10 366.97937:10 538.98022:10 551.49896:31 561.55389:10 575.80237:21 577.50317:237 578.52417:31 579.52228:41 598.85034:10 605.5498:122 607.52344:21 607.56519:207 608.59851:31 633.57233:301 906.7948:20 906.8288:82 906.89252:20	TRUE	TRUE	FALSE	FALSE	FALSE	FALSE	488.375	1175.38	328.5	1589.06	846.375	552.875	1051.75	150.875	404.312	446.062	742.188	292.875	400.438	523.812	914.438	613.562	935.375	634	308.562	372.188	0.218284	0.258298	0.253974	0.781079	0.787738	0.990184
Glycerolipid	TAG	54:2	16:0	18:1	20:1	TAG 16:0-18:1-20:1	C57H106O6	FVKDUIOZGUGCON-NJDMNPJTNA-N	CCCCCCCCCCCCCCCC(=O)OCC(COC(=O)CCCCCCCCC\C=C/CCCCCCCC)OC(=O)CCCCCCCCC\C=C/CCCCCC	15.2047	904.83	[M+NH4]+	3894	81.06653:20 83.08476:20 85.06924:20 93.06705:10 95.08411:51 109.10495:61 121.10286:51 186.99915:51 239.23909:31 247.24178:31 263.23224:10 265.25278:102 267.26489:31 268.99527:112 293.27521:31 339.285:31 549.4776:31 575.50232:51 577.51794:987 578.50842:23 585.76935:10 603.53906:414 605.51288:79 605.54761:1481 606.54095:32 606.56873:61 611.75372:22 631.55804:899 632.56543:51 633.59137:51 887.82452:…	TRUE	TRUE	FALSE	FALSE	FALSE	FALSE	6656.81	9724.5	4880.44	8178.31	9077.69	2718.12	4288.88	1258.44	1979.31	2586	3294.81	1805.81	2485.25	2533.31	3776.19	2790.06	3906.31	2077.44	1747	2113.12	0.000932	0.0007768	0.0006277	0.73534	0.951898	0.63747
Glycerolipid	TAG	54:5	16:0	18:1	20:4	TAG 16:0-18:1-20:4	C57H100O6	WKSLEDJKCJNITP-DEOATQBANA-N	CCCCCCCCCCCCCCCC(=O)OCC(COC(=O)CCC\C=C/C\C=C/C\C=C/C\C=C/CCCCC)OC(=O)CCCCCCCCC\C=C/CCCCCC	14.4838	898.782	[M+NH4]+	11743	71.08482:51 79.05087:31 79.05463:71 81.0694:112 83.08381:61 85.1008:82 91.05578:92 93.06737:71 95.08443:133 97.10365:71 105.06703:82 109.09934:92 111.11571:31 117.07093:61 119.08542:92 121.09691:51 123.11584:71 129.07077:41 131.0773:20 131.08701:51 133.09607:20 133.10095:71 135.11385:71 145.09888:51 147.11806:51 149.14085:51 157.09947:51 159.11655:41 161.13217:61 163.14246:41 165.1779:10 171.1125…	TRUE	TRUE	TRUE	FALSE	FALSE	TRUE	1783.19	1964.12	559.812	2107.75	1021.19	38795.6	60441.8	27542.7	39967.9	44163.5	2369.75	2997.69	4604.44	2401	1967.5	611.188	441.062	464.875	347.812	309	0.0015496	0.0367645	0.0230682	0.0017212	0.0014331	0.0060397
Glycerolipid	TAG	54:6	16:0	18:1	20:5	TAG 16:0-18:1-20:5	C57H98O6	BICSRRMOKQNZTH-WDHDEQFZNA-N	CCCCCCCCCCCCCCCC(=O)OCC(COC(=O)CCC\C=C/C\C=C/C\C=C/C\C=C/C\C=C/CC)OC(=O)CCCCCCCCC\C=C/CCCCCC	14.3635	896.767	[M+NH4]+	13674	79.05965:10 81.07067:82 81.45604:10 83.0838:51 85.1034:31 91.05174:71 93.06738:61 95.08581:112 97.09948:61 103.05502:10 105.06849:51 107.08247:61 109.10082:71 109.11262:10 117.06942:51 117.63645:10 119.0916:41 121.10159:82 123.11743:51 131.07895:31 131.0854:61 133.10097:31 135.11879:61 143.09369:31 145.10571:71 157.09773:31 159.12193:71 161.13222:51 163.1479:31 167.1512:10 169.09766:41 171.11073:…	TRUE	TRUE	FALSE	TRUE	FALSE	TRUE	225.688	637.375	143.625	470.625	484.312	1100.12	357.5	95.8125	296	442.938	824.438	34602.2	46871.6	47334.6	72986.9	14937.4	16538.6	13855.7	9088.94	12191.9	0.740514	0.0267429	0.0005084	0.0268754	0.0004681	0.0809188
Glycerolipid	TAG	54:6	16:0	18:1	20:5	TAG 16:0-18:1-20:5	C57H98O6	BICSRRMOKQNZTH-WDHDEQFZNA-N	CCCCCCCCCCCCCCCC(=O)OCC(COC(=O)CCC\C=C/C\C=C/C\C=C/C\C=C/C\C=C/CC)OC(=O)CCCCCCCCC\C=C/CCCCCC	14.2543	896.768	[M+NH4]+	39752	71.0837:82 77.03558:31 77.04053:10 79.05473:102 81.06824:112 83.0852:122 85.09961:71 91.04783:20 91.05186:122 93.0675:112 95.08319:214 97.09962:163 105.06864:112 107.08263:51 109.09952:122 111.11737:41 113.21376:10 117.06655:92 119.08408:133 120.08385:10 121.10178:163 123.11449:61 125.09804:41 129.06779:71 131.0824:102 133.09793:71 135.12065:82 137.12889:41 143.08043:41 145.10086:102 147.07385:20…	TRUE	TRUE	FALSE	TRUE	FALSE	TRUE	10354.6	16693.5	7876.75	18120.2	21919.2	76633.1	105216	42149.7	64623.1	110806	41016.6	39258.1	54184.5	46482.4	74173.2	14700.9	16538.6	13728.3	9157.12	11417.1	0.0061932	0.0007632	0.531348	0.0776731	0.0061668	0.0033035
Glycerolipid	TAG	56:2	16:0	18:1	22:1	TAG 16:0-18:1-22:1	C59H110O6	FHNDHUBWZSORDJ-IBEOKAAHNA-N	CCCCCCCCCCCCCCCC(=O)OCC(COC(=O)CCCCCCCCC\C=C/CCCCCCCCCC)OC(=O)CCCCCCCCC\C=C/CCCCCC	15.6415	932.856	[M+NH4]+	522	71.08768:5 79.05392:2 81.07123:8 83.08566:6 85.10139:4 93.06664:2 93.07617:1 95.0837:12 97.10014:6 99.11667:2 104.99401:3 107.12699:1 109.09861:5 111.11498:4 117.08395:1 123.11982:7 125.13024:3 127.10921:2 131.2204:1 135.11478:3 137.13783:2 149.13153:3 155.13673:1 163.15079:4 170.96056:1 177.16815:2 183.19989:1 186.99663:8 193.19792:2 212.97865:2 221.23135:2 226.98251:8 235.24425:1 239.23842:8 24…	TRUE	TRUE	FALSE	FALSE	FALSE	FALSE	461.938	1076.69	519.875	1499.44	1144.56	439.312	735.938	151.188	93.0625	299.188	627.125	256.938	439.375	375.562	505.438	286.25	643.625	460.812	209.312	221.625	0.0309996	0.0627173	0.0274214	0.478656	0.888226	0.481117
Glycerolipid	TAG	56:5	16:0	18:1	22:4	TAG 16:0-18:1-22:4	C59H104O6	GRYJGGGFEFFLGH-JAZNFRFKNA-N	CCCCCCCCCCCCCCCC(=O)OCC(COC(=O)CCCCCCCC\C=C/C\C=C/C\C=C/C\C=C/CC)OC(=O)CCCCCCCCC\C=C/CCCCCC	14.7498	926.817	[M+NH4]+	2490	81.0703:41 83.08215:20 85.10303:41 93.06561:20 93.08195:10 95.0854:61 97.09769:31 109.10333:51 117.07812:10 121.09801:41 127.14924:10 133.11186:10 135.11337:31 136.1156:10 145.09668:20 157.09718:20 159.11603:10 170.10948:10 181.16426:10 185.12996:41 187.14723:31 189.1638:20 201.16183:31 203.17191:82 213.16194:20 215.18127:41 217.2018:61 229.19849:20 231.19997:31 239.23178:71 243.2045:10 265.24957…	TRUE	TRUE	FALSE	FALSE	FALSE	TRUE	1187.38	1774.88	2888.88	3379	3945	5191.12	8824.62	2918.06	4694.25	7141.5	782.625	466.125	979.5	798.75	1864.62	749.75	844.25	448.188	450.438	464.875	0.0256413	0.0182955	0.0149364	0.0081409	0.0070189	0.16241
Glycerolipid	TAG	56:6	16:0	18:1	22:5	TAG 16:0-18:1-22:5	C59H102O6	LXKOOMKDVRTCPD-BZAHDIOMNA-N	CCCCCCCCCCCCCCCC(=O)OCC(COC(=O)CCCCC\C=C/C\C=C/C\C=C/C\C=C/C\C=C/CC)OC(=O)CCCCCCCCC\C=C/CCCCCC	14.4872	924.798	[M+NH4]+	18990	71.08488:61 79.0522:51 81.06949:184 83.0826:71 85.09959:51 91.05183:82 93.06883:102 95.08453:173 97.09959:41 105.0686:112 107.08405:61 109.098:61 117.07261:41 119.08557:102 121.09861:61 123.10974:31 123.11288:61 128.0631:31 129.07254:51 131.08556:92 133.10439:61 135.11894:102 137.13213:31 143.08203:31 145.10417:71 147.11484:61 149.13072:51 151.14818:41 157.09616:41 159.11856:122 161.13419:41 161.…	TRUE	TRUE	FALSE	FALSE	FALSE	TRUE	9030.12	13282.6	8041.44	13929.1	13799.9	22500.3	26832.2	15772.3	18187.2	26596.6	22575.8	19684.6	21440.6	20620.2	26174.8	19815.4	27090.9	17660.2	13444	23328.6	0.0036457	0.0002668	0.0117286	0.962185	0.609977	0.50055
Glycerolipid	TAG	52:4	16:0	18:2	18:2	TAG 16:0-18:2-18:2	C55H98O6	UAWKISGGTGCUMP-HTUQFOBENA-N	CCCCCCCCCCCCCCCC(=O)OCC(COC(=O)CCCCCCCC\C=C/C=C\CCCCC)OC(=O)CCCCCCCC\C=C/C=C\CCCCC	14.28	872.767	[M+NH4]+	100651	71.04903:17 71.08591:129 77.03414:10 79.05201:109 81.06802:554 83.05025:21 83.08368:229 85.06423:24 85.10067:122 91.05295:71 93.06859:139 95.04989:14 95.08566:599 97.06458:44 97.1021:139 99.08072:54 99.11724:27 105.06976:54 107.08521:139 109.10211:375 111.08132:24 111.11404:65 113.09633:48 113.13235:17 117.06921:10 119.08369:78 121.10137:235 123.07964:10 123.11565:279 125.13233:34 127.10654:20 12…	TRUE	FALSE	FALSE	FALSE	FALSE	TRUE	145529	141648	82399.2	159283	203246	117293	109729	44564.4	70015.1	92187.4	63599.8	52322.2	80470.4	94310.7	157741	85951.2	107857	82586.4	53919.2	68367.1	0.0349091	0.0668929	0.0142793	0.900725	0.674261	0.641176
Glycerolipid	TAG	52:5	16:0	18:2	18:3	TAG 16:0-18:2-18:3	C55H96O6	DWJFHJOYYJJEBL-IXXGKOKVNA-N	CCCCCCCCCCCCCCCC(=O)OCC(COC(=O)CCCCCCCCC\C=C/C=C\C=C/CC)OC(=O)CCCCCCCC\C=C/C=C\CCCCC	14.0793	870.753	[M+NH4]+	17173	71.0863:71 79.0487:31 79.05497:51 81.06721:204 83.08417:92 85.09987:41 91.05349:41 93.06915:143 95.08211:298 97.1013:102 105.0733:51 107.08733:82 109.10133:153 109.11459:10 119.07983:51 121.09904:143 123.11644:102 131.08603:41 133.09834:51 135.11452:133 137.13261:82 141.16174:10 147.12051:61 149.13127:71 151.147:31 159.11557:51 161.1312:112 163.1433:92 171.11896:31 173.13843:71 175.14549:71 177.1…	TRUE	FALSE	FALSE	FALSE	FALSE	TRUE	26587.9	18513.9	11617.9	24911.7	32088.1	20377.4	25551.8	7719.06	12768.1	17249.9	10148.4	10501.1	15959.7	18359.8	26064.8	13776.9	19549	12268.9	9016.56	10437.7	0.234343	0.191368	0.0397489	0.904219	0.327316	0.380783
Glycerolipid	TAG	56:7	16:0	18:2	22:5	TAG 16:0-18:2-22:5	C59H100O6	XMOVFJSTNHXWAS-HOKMPFPQNA-N	CCCCCCCCCCCCCCCC(=O)OCC(COC(=O)CCCCC\C=C/C\C=C/C\C=C/C\C=C/C\C=C/CC)OC(=O)CCCCCCCC\C=C/C=C\CCCCC	14.3972	922.781	[M+NH4]+	35073	81.06985:71 83.08555:31 91.04951:20 91.0549:41 95.08628:71 97.09996:61 105.06608:31 107.09171:10 109.09837:61 119.08131:31 121.10363:51 123.11793:61 129.0761:10 131.08591:41 133.10147:41 135.11766:61 145.10112:31 147.11688:41 155.09053:10 159.11354:41 161.13092:41 171.11679:41 173.12881:61 175.147:51 183.1171:20 185.13109:71 187.15416:41 189.16299:41 197.13124:41 199.14699:71 201.16499:194 203.17…	TRUE	FALSE	FALSE	FALSE	FALSE	TRUE	13362.8	14602.6	10645.7	18247.8	21193.6	1645.75	1054.88	1181.75	1163.25	1243	24562.8	20204.6	29193.5	26151.8	43047.4	103209	117881	83864.4	77063.7	91948.6	0.0014759	0.016444	0.0002293	0.0021304	0.0002056	4.14e-05
Glycerolipid	TAG	56:8	16:0	18:2	22:6	TAG 16:0-18:2-22:6	C59H98O6	QVEJXKXYAGMVMA-GPKNQBKENA-N	CCCCCCCCCCCCCCCC(=O)OCC(COC(=O)CC\C=C/C\C=C/C\C=C/C\C=C/C\C=C/C\C=C/CC)OC(=O)CCCCCCCC\C=C/C=C\CCCCC	14.0508	920.768	[M+NH4]+	61820	71.08438:51 79.04917:41 81.07023:153 83.08336:51 85.10165:31 91.05533:92 93.06692:71 95.08536:143 97.09903:41 105.06803:82 107.08201:51 109.10184:82 117.06743:71 119.08497:112 121.0949:51 123.11227:51 129.06552:31 131.08171:51 133.10051:102 142.07565:10 145.09843:41 147.11761:31 149.12836:31 156.08739:10 159.11612:71 161.13353:82 163.14563:51 165.1666:31 169.09535:41 171.11028:41 171.11766:143 17…	TRUE	FALSE	FALSE	FALSE	TRUE	TRUE	10825.3	9876.06	7925.75	16061.2	22944	20035.2	29338.6	9979.5	17385.8	21759.3	39156.4	37691.2	49548	52612.7	83141.6	152678	225147	136852	155813	137632	0.175057	0.0019912	0.0006735	0.0058088	0.0007517	0.0003331
Glycerolipid	TAG	56:8	16:0	18:2	22:6	TAG 16:0-18:2-22:6	C59H98O6	QVEJXKXYAGMVMA-GPKNQBKENA-N	CCCCCCCCCCCCCCCC(=O)OCC(COC(=O)CC\C=C/C\C=C/C\C=C/C\C=C/C\C=C/C\C=C/CC)OC(=O)CCCCCCCC\C=C/C=C\CCCCC	14.1501	920.768	[M+NH4]+	63105	71.0864:173 77.03838:61 77.77199:10 79.0538:265 81.07111:468 83.04695:31 83.08424:248 85.10124:204 91.05489:283 93.07056:290 95.08628:629 97.06104:31 97.10274:143 99.11648:41 105.06899:184 107.08443:202 109.09986:392 111.11475:71 116.06155:10 117.07148:153 119.08598:184 121.10057:323 123.11641:263 125.13311:61 128.06192:41 129.06494:61 131.08759:173 133.10155:198 135.07674:31 135.11446:184 137.09…	TRUE	FALSE	FALSE	FALSE	TRUE	TRUE	11174.1	10594.6	7987.88	16061.2	21452.9	18362.1	15089.4	10121.4	14852.1	17757.8	44457.6	37896.8	47804.5	50892.4	83141.6	194259	226181	127116	144478	162410	0.541793	0.0057202	0.0007817	0.0079539	0.0008853	0.0002946
Glycerolipid	TAG	58:11	16:0	20:5	22:6	TAG 16:0-20:5-22:6	C61H96O6	UZFNMPJCAIVEGV-RJPYUBGTNA-N	CCCCCCCCCCCCCCCC(=O)OCC(COC(=O)CC\C=C/C\C=C/C\C=C/C\C=C/C\C=C/C\C=C/CC)OC(=O)CCC\C=C/C\C=C/C\C=C/C\C=C/C\C=C/CC	13.9405	942.749	[M+NH4]+	7770	71.08977:10 81.06581:31 85.09972:20 91.05466:41 93.06897:20 95.08192:41 105.06874:31 107.08273:20 115.05424:10 117.06511:31 121.10497:20 129.07109:20 133.10289:20 135.11253:20 141.0692:10 145.10092:51 153.07982:10 155.09035:20 157.1069:10 161.13075:20 163.15724:20 169.10718:10 173.1268:31 175.15617:31 179.08424:10 185.13094:31 197.13507:20 199.14288:41 201.17087:92 211.13885:20 225.16347:20 239.2…	TRUE	FALSE	FALSE	TRUE	TRUE	TRUE	10	18.5625	6.6875	8	37.75	2863.69	121.062	48.3125	99	69.9375	23186.4	19353.4	30972.2	22833.4	38188.6	3415.38	4143.44	3228.5	3180	3623.88	0.324389	0.0013838	3.61e-05	0.0012865	0.004883	0.0023084
Glycerolipid	TAG	50:4	16:1	16:1	18:2	TAG 16:1-16:1-18:2	C53H94O6	RHRCBOCRXHUAJG-AQTXVFEXNA-N	CCCCCCCC\C=C/CCCCCC(=O)OCC(COC(=O)CCCCCCCC\C=C/C=C\CCCCC)OC(=O)CCCCC\C=C/CCCCCCCC	13.9963	844.737	[M+NH4]+	5567	71.0914:10 79.05659:10 81.07012:61 83.08326:41 93.07092:31 95.08527:112 97.10033:41 109.09735:41 111.11817:31 121.10107:61 121.1166:10 123.12006:61 135.11995:41 149.13182:41 155.14053:10 209.20322:10 219.2113:71 235.1949:10 237.2245:214 242.97406:10 245.23128:82 263.23886:133 268.99734:61 311.25784:153 317.24789:10 319.25391:31 337.26593:51 521.43549:51 521.48706:31 545.42035:20 545.4566:102 547.…	FALSE	TRUE	FALSE	FALSE	FALSE	TRUE	10720.6	8111.81	4206.5	10128.3	12657.8	6018.75	6497.38	2325.44	3480.56	4515.69	3619.25	2541.38	3821.31	5547.62	10189.1	3620.19	4977.25	3102.75	2529.38	2720.56	0.0226111	0.0756637	0.0133402	0.721008	0.222946	0.251758
Glycerolipid	TAG	50:5	16:1	16:1	18:3	TAG 16:1-16:1-18:3	C53H92O6	HJFDNNHLSVDCOM-OFMGDYCANA-N	CCCCCCCC\C=C/CCCCCC(=O)OCC(COC(=O)CCCCCCCCC\C=C/C=C\C=C/CC)OC(=O)CCCCC\C=C/CCCCCCCC	13.8669	842.719	[M+NH4]+	996	81.07098:31 104.9894:20 177.16031:10 186.99629:71 235.20276:10 261.21832:31 267.52911:10 269.0011:245 292.97934:10 311.25192:31 350.99982:41 433.00195:61 515.00104:71 545.45197:92 547.4704:143 571.47333:153 573.48187:61 597.47668:41 599.48547:31 821.62787:31 821.66827:61 825.68103:31 842.72235:82	FALSE	TRUE	FALSE	FALSE	FALSE	TRUE	1559.69	999.375	748.125	1411.56	1478.44	1736.12	2170.75	644.812	839.562	1137.25	683.625	580.625	726.75	895.25	1701.62	620.875	667.625	548.438	311.5	458.188	0.843236	0.243707	0.0027623	0.298384	0.0492968	0.12348
Glycerolipid	TAG	52:6	16:1	18:2	18:3	TAG 16:1-18:2-18:3	C55H94O6	ZNWMQGQSWLJCNF-YOPYQNEPNA-N	CCCCCCCC\C=C/CCCCCC(=O)OCC(COC(=O)CCCCCCCCC\C=C/C=C\C=C/CC)OC(=O)CCCCCCCC\C=C/C=C\CCCCC	13.9422	868.737	[M+NH4]+	4422	83.08345:20 93.07246:10 97.1005:10 109.10635:20 135.11513:31 137.12993:41 145.11382:10 177.17598:20 187.15324:10 223.14539:10 237.2113:20 237.23087:31 243.20705:31 245.23329:31 250.96002:10 261.21664:31 263.23175:41 309.23956:10 311.25745:31 317.24246:20 335.26813:31 337.27579:31 480.93118:20 497.43808:20 519.43884:20 545.47516:10 562.94208:10 569.46838:52 571.47009:324 573.46509:124 573.48199:26…	FALSE	TRUE	FALSE	FALSE	FALSE	TRUE	3504	2119.62	1737.44	3605.56	3276.44	4791.31	6317.5	1604.56	2983.88	4531.75	5196.44	5554.12	7850.94	6874	17757.8	2221.19	2713.5	2454.56	1293.31	2052.69	0.217415	0.0665314	0.160323	0.098675	0.0772869	0.0487074
Glycerolipid	TAG	54:8	16:1	18:2	20:5	TAG 16:1-18:2-20:5	C57H94O6	DBFHSLPVJQVFBG-OGHWRWCLNA-N	CCCCCCCC\C=C/CCCCCC(=O)OCC(COC(=O)CCC\C=C/C\C=C/C\C=C/C\C=C/C\C=C/CC)OC(=O)CCCCCCCC\C=C/C=C\CCCCC	13.8439	892.738	[M+NH4]+	4676	77.04198:10 79.05368:61 80.05916:10 81.06972:82 83.08413:41 85.10504:10 93.06911:51 95.08482:71 107.08584:51 109.09982:61 111.12065:10 117.06687:41 119.08441:61 121.09745:71 123.11484:31 131.0876:71 133.09831:41 135.11447:51 137.13094:20 145.09447:20 149.1295:41 159.11375:51 161.13475:41 163.14505:41 171.11707:31 173.12912:51 175.14359:41 177.12651:20 183.11171:41 185.13144:51 187.15067:51 189.16…	FALSE	TRUE	FALSE	TRUE	FALSE	TRUE	1128.25	995.188	740.438	1563.88	1519.69	1446.62	1888.88	839.375	996.5	1725.69	9250	6526.62	10220.8	9455.25	19044.7	4766.19	6203.31	4680.94	3942.06	6587.06	0.479989	0.0101858	0.0006971	0.0108011	9.52e-05	0.05486
Glycerolipid	TAG	56:9	16:1	18:2	22:6	TAG 16:1-18:2-22:6	C59H96O6	WFYHJYHILQFBRC-JBUVGVCENA-N	CCCCCCCC\C=C/CCCCCC(=O)OCC(COC(=O)CC\C=C/C\C=C/C\C=C/C\C=C/C\C=C/C\C=C/CC)OC(=O)CCCCCCCC\C=C/C=C\CCCCC	13.9044	918.753	[M+NH4]+	11556	77.03537:10 77.04404:5 79.05325:61 81.07055:153 83.08111:46 89.05671:5 91.05296:76 93.0686:82 95.08567:163 97.10073:31 105.06544:25 105.06979:51 107.08524:76 109.09772:82 111.08136:20 117.06467:25 119.08373:51 121.09986:92 123.11569:71 129.06902:31 131.08684:51 133.10242:46 135.11697:56 137.13177:46 139.11157:20 143.07999:10 145.10211:61 147.11618:31 149.13208:41 153.12468:20 155.08102:20 157.104…	FALSE	TRUE	FALSE	FALSE	TRUE	TRUE	2345.12	1763.62	1975.94	3243.81	4481	6220.81	8635.56	5116.88	5992.5	7365.19	19597.6	15797.1	21518.2	17542.6	27788.1	15616.1	19300.9	14011.4	15417.5	17399.6	0.0011077	0.000707	1.1e-06	0.001771	2.15e-05	0.107749
Glycerolipid	TAG	56:11	16:1	20:5	20:5	TAG 16:1-20:5-20:5	C59H92O6	GUJNMKWVZPJYOU-ZNJJPBOTNA-N	CCCCCCCC\C=C/CCCCCC(=O)OCC(COC(=O)CCC\C=C/C\C=C/C\C=C/C\C=C/C\C=C/CC)OC(=O)CCC\C=C/C\C=C/C\C=C/C\C=C/C\C=C/CC	13.6147	914.721	[M+NH4]+	1174	79.05094:20 79.0547:82 81.06694:41 83.08517:51 91.04779:31 91.05318:92 93.06747:82 93.07835:10 95.08591:92 103.80556:10 105.0686:41 107.09134:31 111.11732:31 117.06802:51 119.08557:71 121.10172:82 129.06934:51 131.0791:31 131.08717:92 133.09462:31 135.11568:51 143.08203:41 145.09738:61 157.10323:41 159.11322:71 161.1324:31 163.1463:41 169.09236:20 169.09787:51 171.11833:51 173.13594:41 175.15045:…	FALSE	TRUE	FALSE	TRUE	FALSE	TRUE	32.5	99.0625	23.75	56	84.125	150.688	133.062	149.938	167.375	111.188	2786.81	2696.5	5560.06	3217.56	6779.56	309.5	255.5	281.188	218.812	360.375	0.0013338	0.0074392	4.15e-05	0.0079968	0.0005612	0.0090438
Glycerolipid	TAG	56:10	16:2	18:2	22:6	TAG 16:2-18:2-22:6	C59H94O6	LZDYYNPDHRVGGU-DDVSUIFQNA-N	CCCCCCCC\C=C/C\C=C/CCC(=O)OCC(COC(=O)CC\C=C/C\C=C/C\C=C/C\C=C/C\C=C/C\C=C/CC)OC(=O)CCCCCCCC\C=C/C=C\CCCCC	13.7452	916.738	[M+NH4]+	1864	81.0733:10 99.08801:10 109.10241:31 119.0871:20 127.10532:10 135.11729:20 156.61726:10 161.13596:31 167.1076:10 199.15863:10 211.14276:20 226.99828:20 233.19601:10 235.20834:20 250.94502:10 263.23239:20 293.22696:20 309.25262:10 335.2533:10 337.28168:41 389.28284:10 391.00784:31 571.43372:21 571.46069:258 572.46619:31 595.46167:10 597.47052:41 619.47168:51 619.51385:10 621.49597:51 645.47162:41 6…	FALSE	FALSE	FALSE	FALSE	TRUE	TRUE	292.375	308.562	229.938	519.312	666.938	679.25	917.562	541.75	870.812	995.625	3637.25	2365.5	6109.62	3580.75	7639.94	1489.31	1935.81	1229.19	1473.88	1801.75	0.0092918	0.0111268	4.95e-05	0.0155457	0.0008267	0.0319926
Glycerolipid	TAG	53:3	17:0	18:1	18:2	TAG 17:0-18:1-18:2	C56H102O6	JCUUGUUICZELJG-KDHVXLOFNA-N	CCCCCCCCCCCCCCCCC(=O)OCC(COC(=O)CCCCCCCC\C=C/C=C\CCCCC)OC(=O)CCCCCCCCC\C=C/CCCCCC	14.6804	888.803	[M+NH4]+	1522	95.0873:10 144.98363:10 167.13875:10 226.99429:20 255.00699:10 279.27368:10 339.29587:20 390.99731:20 559.48114:10 561.47852:31 575.47217:20 575.49927:61 587.5022:21 589.51129:175 591.51697:61 591.54095:112 599.61169:10 601.50641:82 601.55487:31 603.52545:71 615.52863:51 625.52393:20 629.5531:31 867.75214:165 868.74988:20 888.79169:61	TRUE	TRUE	FALSE	FALSE	FALSE	TRUE	2619.25	2799.31	1498.06	3308.88	3254.56	1276.88	1556.12	569.438	956.188	1142.44	1161.25	686.688	1193.88	1194.88	1175.06	1477.31	1720.25	960.125	981.75	898.938	0.0024213	0.0060355	0.0036129	0.928286	0.657016	0.532846
Glycerolipid	TAG	55:7	17:0	18:2	20:5	TAG 17:0-18:2-20:5	C58H98O6	HMPVFQUCPPUAKB-OGDQCWNLNA-N	CCCCCCCCCCCCCCCCC(=O)OCC(COC(=O)CCC\C=C/C\C=C/C\C=C/C\C=C/C\C=C/CC)OC(=O)CCCCCCCC\C=C/C=C\CCCCC	14.1319	908.771	[M+NH4]+	1117	79.05724:10 93.07293:10 121.10328:20 133.10602:10 161.13956:10 171.11462:20 175.1467:31 183.12634:10 187.14807:31 199.14671:10 201.16472:41 219.11783:10 257.23074:10 265.28052:20 267.21432:41 281.23135:10 285.22748:41 311.26065:10 313.27512:31 326.22687:10 337.26874:20 537.53406:10 561.49097:31 563.50873:31 575.49487:92 585.55353:10 589.51367:133 590.52466:20 598.48492:20 609.4903:31 611.49475:51…	TRUE	FALSE	FALSE	TRUE	FALSE	TRUE	490.062	355.312	248.062	437.188	550.125	783.312	1006.06	340.25	408.688	674.5	2075.69	1060.75	2089.31	1841.75	2329.81	1455.94	2387.88	1521.19	494.5	1798.62	0.127601	0.0019537	0.0210291	0.0011415	0.027504	0.383207
Glycerolipid	TAG	57:8	17:0	18:2	22:6	TAG 17:0-18:2-22:6	C60H100O6	CVTAZAZGSZQEFE-QHRLSFOWNA-N	CCCCCCCCCCCCCCCCC(=O)OCC(COC(=O)CC\C=C/C\C=C/C\C=C/C\C=C/C\C=C/C\C=C/CC)OC(=O)CCCCCCCC\C=C/C=C\CCCCC	14.2905	934.791	[M+NH4]+	693	80.05237:31 251.23938:10 291.20743:10 309.00366:10 311.24228:31 328.99918:10 551.42834:10 585.4801:10 589.47424:21 589.52222:386 635.50775:41 637.51178:41 647.48578:71 688.93341:10 852.72687:41 903.73529:31 913.73431:31 917.74335:41 934.78149:82	TRUE	FALSE	FALSE	FALSE	TRUE	TRUE	653.875	308.812	188.062	578.938	711	466.312	419.438	87.375	414.75	566.25	433.938	338.25	438.688	434.938	767.375	1417.69	1548.25	1099.19	1312.81	1667.38	0.475256	0.966176	0.0001842	0.424847	4.24e-05	6.52e-05
Glycerolipid	TAG	53:4	17:1	18:1	18:2	TAG 17:1-18:1-18:2	C56H100O6	QRDLWPASSJSSME-XMOCMKDKNA-N	CCCCCCCCC\C=C/CCCCCC(=O)OCC(COC(=O)CCCCCCCC\C=C/C=C\CCCCC)OC(=O)CCCCCCCCC\C=C/CCCCCC	14.4182	886.777	[M+NH4]+	1695	81.0685:61 93.06781:20 109.10725:31 121.10374:31 135.10472:20 226.99295:41 243.21101:10 251.23683:31 261.25504:10 263.22906:41 265.25647:51 268.99667:61 319.24814:20 327.22812:92 339.28143:31 390.98749:51 472.99393:41 515.02063:20 555.01349:31 563.49152:20 571.48389:10 573.49585:51 575.50458:41 585.64874:10 587.50079:456 589.4859:126 589.51331:623 590.53113:32 597.63922:10 599.50665:194 601.51544…	FALSE	TRUE	FALSE	FALSE	FALSE	TRUE	3628.12	2278.62	2583.56	4337.94	3821.81	1167.69	1966.81	1140.44	1123.62	1107.81	989.188	853.938	811.625	1388.06	1643.81	1577.12	1155.38	836.5	710.562	786.812	0.0013464	0.0008084	0.0005597	0.501154	0.247897	0.601276
Glycerolipid	TAG	53:4	17:1	18:1	18:2	TAG 17:1-18:1-18:2	C56H100O6	QRDLWPASSJSSME-XMOCMKDKNA-N	CCCCCCCCC\C=C/CCCCCC(=O)OCC(COC(=O)CCCCCCCC\C=C/C=C\CCCCC)OC(=O)CCCCCCCCC\C=C/CCCCCC	14.4193	886.786	[M+NH4]+	1829	79.05543:15 81.06768:31 81.43267:5 91.27896:5 95.08125:25 97.09628:20 109.096:10 109.10337:20 119.08813:5 135.11517:15 186.9991:25 223.17947:5 226.98315:46 245.22049:20 251.23325:15 263.23456:51 265.24591:25 268.99762:41 308.99469:25 319.26178:15 325.2771:20 337.27921:20 339.2981:20 390.99426:51 433.0065:10 472.99835:56 502.34796:5 554.995:15 561.5321:10 563.51648:31 573.49066:41 575.49261:31 575…	FALSE	TRUE	FALSE	FALSE	FALSE	TRUE	3644.19	2737.44	3084.25	3635.94	4537.94	1321.25	1576.38	833.938	1500.12	1925.94	1285.75	779.938	1215	1417.06	1703.19	1632.31	1037.62	815.375	955.562	931.875	0.0003529	0.0001693	8.68e-05	0.535269	0.158475	0.352073
Glycerolipid	TAG	58:7	18:0	18:1	22:6	TAG 18:0-18:1-22:6	C61H104O6	YDPMCTJRBOYHEK-RBCPUQDENA-N	CCCCCCCCCCCCCCCCCC(=O)OCC(COC(=O)CC\C=C/C\C=C/C\C=C/C\C=C/C\C=C/C\C=C/CC)OC(=O)CCCCCCCCC\C=C/CCCCCC	14.7124	950.808	[M+NH4]+	840	71.08823:10 81.07307:31 83.08366:20 97.10211:20 105.06689:20 107.08669:10 119.09606:10 163.10811:20 207.17378:10 211.1506:10 213.16454:51 227.18713:51 239.22801:31 265.24564:31 267.26001:20 293.21448:31 309.22491:10 311.23529:82 339.29233:41 341.30679:61 577.47601:20 577.51331:51 578.50714:61 578.52411:92 599.48914:31 600.50177:82 603.53424:31 604.52594:61 605.5462:776 606.55695:31 623.48077:31 6…	TRUE	TRUE	FALSE	FALSE	TRUE	TRUE	26.6875	299.25	41.1875	216.688	1538.44	188.438	127	86.9375	134.875	197.125	323.438	169.438	185.062	367.688	254.438	3428.62	3735	1888.44	1917.5	1678.38	0.383215	0.594914	0.0036325	0.0315891	0.0053267	0.0062185
Glycerolipid	TAG	54:3	18:1	18:1	18:1	TAG 18:1-18:1-18:1	C57H104O6	JSSROPRCXOAGCW-BUTYCLJRSA-N	CCCCCC\C=C/CCCCCCCCCC(=O)OCC(COC(=O)CCCCCCCCC\C=C/CCCCCC)OC(=O)CCCCCCCCC\C=C/CCCCCC	14.8623	902.816	[M+NH4]+	18308	71.0828:36 77.03713:31 79.05254:51 81.06857:282 83.08297:163 85.10126:61 91.05493:36 93.06924:92 95.08495:365 97.10001:204 99.07862:25 107.08306:71 109.10143:270 111.11485:97 113.09566:20 119.08457:20 121.10226:194 123.11187:66 123.11656:148 125.09382:20 125.13011:46 131.08777:5 135.10645:20 135.11465:199 137.1311:87 139.10757:20 141.12836:31 149.13313:127 151.14542:61 153.12927:31 155.14363:20 1…	FALSE	TRUE	FALSE	FALSE	FALSE	FALSE	39467	43380.2	18327.8	47378.1	53487.6	11997.8	13023.3	5257.94	7082.06	11020.7	12961.7	7372.25	11652.5	11859.4	17134.4	11680	18512.9	9309.19	7132.75	8121.12	0.0055741	0.0076544	0.0016281	0.276977	0.627433	0.640536
Glycerolipid	TAG	54:4	18:1	18:1	18:2	TAG 18:1-18:1-18:2	C57H102O6	XIKRLPVGWJXBJH-QFACYJBGNA-N	CCCCCC\C=C/CCCCCCCCCC(=O)OCC(COC(=O)CCCCCCCC\C=C/C=C\CCCCC)OC(=O)CCCCCCCCC\C=C/CCCCCC	14.5516	900.791	[M+NH4]+	23686	77.04041:10 79.05209:31 81.06811:102 83.08764:71 95.08718:92 97.10226:51 107.09124:10 109.10232:82 121.10317:82 123.11278:51 133.10266:31 135.11394:82 137.13368:31 147.11304:10 149.13235:51 161.12874:31 165.16354:31 175.1429:20 177.17088:31 179.18788:31 189.16264:41 191.18027:31 245.22733:71 247.24422:82 263.23474:194 265.25528:214 268.99548:31 291.27097:31 319.26434:51 337.26886:51 339.29031:235…	FALSE	TRUE	FALSE	FALSE	FALSE	TRUE	43117.4	35732.7	28489.1	50683.1	55618.3	18537.3	29888.4	9575.38	14402.9	18332.4	16248.9	13716.6	18816	22322.4	21219.8	16878.8	24088.8	14832.1	10204.9	11010.7	0.0032765	0.0058116	0.0010986	0.933951	0.53012	0.330022
Glycerolipid	TAG	54:4	18:1	18:1	18:2	TAG 18:1-18:1-18:2	C57H102O6	XIKRLPVGWJXBJH-QFACYJBGNA-N	CCCCCC\C=C/CCCCCCCCCC(=O)OCC(COC(=O)CCCCCCCC\C=C/C=C\CCCCC)OC(=O)CCCCCCCCC\C=C/CCCCCC	14.5653	900.802	[M+NH4]+	29479	71.05141:10 81.06931:92 83.07986:31 83.085:71 85.09941:31 88.76674:10 93.0632:20 93.07001:51 95.07885:20 95.08435:102 97.10079:61 97.11192:10 105.0713:10 107.08677:41 109.10075:112 111.11118:31 121.09841:31 121.10152:71 123.11581:41 133.1058:10 135.11053:61 136.08644:10 137.12862:51 145.39984:10 149.13223:41 161.13219:31 163.14427:41 167.18402:10 175.14648:31 189.15862:31 224.15227:10 245.2227:51…	FALSE	TRUE	FALSE	FALSE	FALSE	TRUE	59517.2	51618.8	43811.1	61310.2	73255.2	19149.9	29453.9	11768.2	18678.6	22971.8	24221.8	14529.2	22630.3	24463.5	24058.3	17079	27355.8	15743.9	14303.5	13656.8	0.0001786	0.0001389	8.61e-05	0.660602	0.488791	0.202627
Glycerolipid	TAG	58:7	18:1	18:1	22:5	TAG 18:1-18:1-22:5	C61H104O6	AANCKINPVVQDGX-HRVFRTFQNA-N	CCCCCC\C=C/CCCCCCCCCC(=O)OCC(COC(=O)CCCCC\C=C/C\C=C/C\C=C/C\C=C/C\C=C/CC)OC(=O)CCCCCCCCC\C=C/CCCCCC	14.5546	950.816	[M+NH4]+	3208	81.06834:31 93.06624:20 95.08466:51 109.1055:31 121.09565:20 121.1003:31 135.12073:41 161.13614:31 171.11664:31 187.15404:10 199.14888:31 201.1629:51 213.15892:31 215.18239:31 219.17441:10 247.2422:31 263.23721:20 265.25085:61 267.26526:31 293.28522:20 295.24316:31 313.26788:51 321.26169:41 339.27487:51 367.32669:31 369.27075:41 571.50494:10 575.49524:61 577.49725:82 577.521:173 601.52655:82 603.…	FALSE	TRUE	FALSE	FALSE	FALSE	TRUE	1560.75	2983.44	2058.81	3317.75	2605.25	4004.75	4816.94	1723.12	3285.06	4445.06	5401	4298.5	4723.88	5429.31	5524.44	1642.81	2392.56	1377.94	1166.75	1399.5	0.105763	0.0001929	0.0439239	0.0445657	0.0079319	4.7e-06
Glycerolipid	TAG	58:8	18:1	18:1	22:6	TAG 18:1-18:1-22:6	C61H102O6	VULLTLRIKFDMHX-IOGDVMKPNA-N	CCCCCC\C=C/CCCCCCCCCC(=O)OCC(COC(=O)CC\C=C/C\C=C/C\C=C/C\C=C/C\C=C/C\C=C/CC)OC(=O)CCCCCCCCC\C=C/CCCCCC	14.3967	948.798	[M+NH4]+	8055	79.04843:20 79.0547:51 81.06948:122 83.08517:82 85.10218:51 91.05452:61 93.07018:51 95.08453:133 97.09958:51 107.08695:41 109.09798:92 117.06496:20 119.08093:51 119.08556:61 121.09859:92 123.11443:41 131.08231:41 133.09459:41 135.11565:82 143.08707:51 147.11482:41 149.13586:61 153.13551:31 157.09613:41 159.11853:31 161.127:71 163.14445:31 165.17448:20 167.13861:10 169.09782:61 171.11276:71 173.12…	FALSE	TRUE	FALSE	FALSE	TRUE	TRUE	4227.06	5482.88	3699.69	5854.25	7699	3632	5003.12	2105.25	4234.81	5236.25	8246	4962.44	7484.88	5409.69	8989.75	19046.9	21441.1	12811.2	10786.8	14745.7	0.170411	0.161257	0.0010996	0.015224	0.0028829	0.0033228
Glycerolipid	TAG	58:8	18:1	18:1	22:6	TAG 18:1-18:1-22:6	C61H102O6	VULLTLRIKFDMHX-IOGDVMKPNA-N	CCCCCC\C=C/CCCCCCCCCC(=O)OCC(COC(=O)CC\C=C/C\C=C/C\C=C/C\C=C/C\C=C/C\C=C/CC)OC(=O)CCCCCCCCC\C=C/CCCCCC	14.3135	948.808	[M+NH4]+	6586	81.0672:31 107.07993:20 121.10199:31 131.08907:31 159.12062:31 168.06131:10 185.12532:20 187.15608:31 199.11714:20 219.14737:10 227.1857:31 247.24008:31 265.25095:61 293.22488:51 311.23358:71 339.2905:92 557.43994:10 589.50024:20 601.52643:31 603.06378:22 603.53162:924 604.51984:41 604.54413:61 627.55725:10 629.5274:41 645.47192:10 647.49152:71 649.50354:196 650.53949:31 651.51868:41 931.77155:41…	FALSE	TRUE	FALSE	FALSE	TRUE	TRUE	4550.06	4496.25	3148	5095.19	7395.25	3436.44	4431.19	3219.94	4675.88	6202.69	7787.81	5180.5	6544.38	4896.06	7086.81	13451.6	12282.3	7349.38	8599.62	11897.2	0.550961	0.16309	0.0027508	0.0378144	0.0011382	0.0090213
Glycerolipid	TAG	58:8	18:1	18:1	22:6	TAG 18:1-18:1-22:6	C61H102O6	VULLTLRIKFDMHX-IOGDVMKPNA-N	CCCCCC\C=C/CCCCCCCCCC(=O)OCC(COC(=O)CC\C=C/C\C=C/C\C=C/C\C=C/C\C=C/C\C=C/CC)OC(=O)CCCCCCCCC\C=C/CCCCCC	14.4226	948.81	[M+NH4]+	6183	71.08221:31 79.05566:71 81.06664:163 83.0823:92 85.10709:10 91.05152:41 93.06987:71 95.08421:153 97.09926:92 103.04763:10 105.06827:51 107.08079:51 107.10706:10 109.1006:143 111.11253:41 117.07073:71 119.08368:92 121.09982:133 123.11721:102 129.06256:31 130.07433:10 131.07874:41 133.09914:51 135.11366:82 137.13506:51 141.13237:10 145.09871:61 147.08025:41 149.12689:41 157.09399:20 157.0993:41 159…	FALSE	TRUE	FALSE	FALSE	TRUE	TRUE	4582.5	4444.44	2599.38	4262.75	6354.12	2402.12	4039.19	2107.19	3080.12	3579.62	1360.06	3471.31	4857.5	988.312	7086.81	15705.2	20609.4	10517.6	9740.5	11864.9	0.0776592	0.503327	0.0080917	0.685261	0.0054578	0.0023126
Glycerolipid	TAG	54:5	18:1	18:2	18:2	TAG 18:1-18:2-18:2	C57H100O6	POVFMDGBZDJLAN-BHFHHPLZNA-N	CCCCCC\C=C/CCCCCCCCCC(=O)OCC(COC(=O)CCCCCCCC\C=C/C=C\CCCCC)OC(=O)CCCCCCCC\C=C/C=C\CCCCC	14.3053	898.782	[M+NH4]+	30799	71.08295:31 77.03729:51 77.08931:10 79.05521:102 81.06746:341 83.08442:163 85.06499:51 91.05241:92 93.06943:133 95.08376:459 97.06545:61 97.10159:122 99.08162:41 103.05578:10 105.06927:61 107.07742:51 107.08765:133 109.10017:239 111.08086:51 111.11655:71 119.08324:61 121.09782:251 123.11835:175 125.09404:31 127.11091:51 133.09708:102 135.11325:173 137.13135:102 139.11115:61 145.1102:10 147.11577:…	FALSE	TRUE	FALSE	FALSE	FALSE	TRUE	38938.7	60278.3	30025.3	53363.8	60619.6	29815.8	44537	13953.2	21989.3	29478.8	28448.8	17037.9	29164.6	22172	32295.8	23960.6	27418.9	20372.1	14928.7	17172	0.0310014	0.0091346	0.0026435	0.72087	0.230905	0.19243
Glycerolipid	TAG	54:6	18:1	18:2	18:3	TAG 18:1-18:2-18:3	C57H98O6	PXFPBVBCKXAEFP-QZOFRBEONA-N	CCCCCC\C=C/CCCCCCCCCC(=O)OCC(COC(=O)CCCCCCCCC\C=C/C=C\C=C/CC)OC(=O)CCCCCCCC\C=C/C=C\CCCCC	14.1002	896.767	[M+NH4]+	23758	77.03235:10 79.05146:41 81.0662:92 83.08314:41 91.04972:20 93.06942:51 95.08376:92 97.10298:51 105.06782:31 107.08909:41 109.10015:61 115.05027:10 119.094:10 121.09936:51 123.1105:31 131.08473:41 133.10031:31 135.10992:20 135.11485:71 145.10504:20 149.13506:41 156.08015:10 160.11414:10 161.13336:71 163.15086:51 173.13139:41 175.14587:61 177.16074:31 193.1588:20 199.15385:10 209.13765:10 235.24652…	FALSE	TRUE	FALSE	FALSE	FALSE	TRUE	17744.1	29047.8	13859.3	27531.7	32546.2	56193.1	26494.2	24092.9	39032.9	14200.4	21077.6	13028.9	22688.4	23869.3	36390.4	17518.2	22426.9	14520.1	10718.6	12179	0.357861	0.890554	0.0684748	0.322312	0.0832509	0.101897
Glycerolipid	TAG	56:3	18:1	18:2	20:0	TAG 18:1-18:2-20:0	C59H108O6	ZVFWNKHIWUNGLF-RUAITIBSNA-N	CCCCCCCCCCCCCCCCCCCC(=O)OCC(COC(=O)CCCCCCCCC\C=C/CCCCCC)OC(=O)CCCCCCCC\C=C/C=C\CCCCC	15.2601	930.843	[M+NH4]+	1568	95.08596:15 121.10023:10 135.1223:5 207.2088:5 226.98993:25 263.23486:25 265.24622:15 267.26984:10 269.00024:20 337.26895:10 348.98206:10 390.99698:20 430.98001:15 466.97552:5 552.97205:5 575.50208:71 577.52448:10 599.05847:5 601.51276:112 603.52832:127 604.53387:10 605.5542:25 629.55243:117 631.56122:199 633.58026:269 647.57074:5 657.57941:76 658.6001:15 659.61432:20 913.81445:31 930.8421:76	TRUE	TRUE	FALSE	FALSE	FALSE	TRUE	2356.94	2961.88	1655.06	4062.31	3560	1167.88	1986.94	424.875	627.938	1096.5	1754.69	662.875	899.875	841.938	1693.31	1042.44	2048.19	918.688	708.312	885.875	0.006203	0.0068581	0.0061795	0.764965	0.872096	0.883904
Glycerolipid	TAG	56:4	18:1	18:2	20:1	TAG 18:1-18:2-20:1	C59H106O6	HJTVQGCEWGLLJL-VCFWUCCFNA-N	CCCCCCCC\C=C/CCCCCCCCCC(=O)OCC(COC(=O)CCCCCCCCC\C=C/CCCCCC)OC(=O)CCCCCCCC\C=C/C=C\CCCCC	14.8907	928.822	[M+NH4]+	2558	79.05196:10 83.0875:31 95.08291:20 95.09254:10 107.09109:10 129.07069:10 239.24353:10 245.22276:31 251.23331:10 263.23688:61 264.23816:10 265.25974:51 293.28006:51 339.29279:41 367.32104:31 573.4798:20 577.51428:31 599.50745:41 601.51965:543 602.53741:31 603.52832:166 627.52917:31 628.53687:21 629.55603:704 630.55115:31 631.55768:554 632.55444:31 655.54779:41 655.57306:41 911.75177:31 911.80719:7…	FALSE	TRUE	FALSE	FALSE	FALSE	TRUE	4571.31	5430	2768.88	6820.56	7150.31	2077.94	3028.88	938.312	1332.44	1713.69	2329.62	834.875	1631.19	1376.19	1627.69	1473.88	2810.06	1450	979.188	818.438	0.0037111	0.0069822	0.0022366	0.565529	0.550443	0.902805
Glycerolipid	TAG	56:4	18:1	18:2	20:1	TAG 18:1-18:2-20:1	C59H106O6	HJTVQGCEWGLLJL-VCFWUCCFNA-N	CCCCCCCC\C=C/CCCCCCCCCC(=O)OCC(COC(=O)CCCCCCCCC\C=C/CCCCCC)OC(=O)CCCCCCCC\C=C/C=C\CCCCC	14.8948	928.834	[M+NH4]+	2844	71.08892:10 81.06874:71 83.08314:31 94.0739:10 95.08651:71 97.10298:41 107.09055:10 109.1031:41 121.09935:31 123.11205:31 135.11647:41 137.1346:20 157.09885:10 163.14725:20 175.14772:20 245.23094:41 247.23676:41 263.24078:82 265.24756:122 269.00159:20 293.2818:102 319.25848:41 337.27841:20 339.28168:51 339.29727:31 367.32034:51 573.48248:41 575.48444:20 575.50476:51 577.51361:20 583.54413:10 599.…	FALSE	TRUE	FALSE	FALSE	FALSE	TRUE	4165.44	7657.69	3777.81	8291.69	7400.19	1789.12	2809.69	947	1542.88	1849.88	2448.38	1207.94	1907.31	1382.44	1823	1387.69	2988.25	1381.25	1230.88	883.812	0.0070535	0.0076598	0.0017193	0.929555	0.664169	0.684002
Glycerolipid	TAG	56:7	18:1	18:2	20:4	TAG 18:1-18:2-20:4	C59H100O6	SWMNCGDYDOSPOP-WJTOUQSSNA-N	CCCCCC\C=C/CCCCCCCCCC(=O)OCC(COC(=O)CCC\C=C/C\C=C/C\C=C/C\C=C/CCCCC)OC(=O)CCCCCCCC\C=C/C=C\CCCCC	14.2654	922.784	[M+NH4]+	32936	71.08469:31 79.05324:71 81.07053:153 83.08624:112 85.06421:31 91.04889:20 91.05697:112 92.06138:10 93.06993:102 95.08565:194 97.06595:41 97.1021:61 99.08071:41 105.07121:92 107.08228:82 109.06822:20 109.09916:133 111.1185:41 111.15717:10 117.06617:82 119.08215:112 121.09982:143 123.11879:102 129.06416:31 129.65147:10 131.08519:71 133.10237:143 135.11528:112 137.12843:41 143.08669:41 145.09866:41 …	FALSE	TRUE	TRUE	FALSE	FALSE	TRUE	7613.31	11928.2	5684.19	14564.6	13082.9	31309.3	38035.8	14843.4	25561.8	37593.5	34691.1	31189.4	36457.8	37917.4	59089.4	38801.4	76912.8	50957.7	26787.3	65706.9	0.0035291	0.0004995	0.0092004	0.15118	0.0553115	0.277265
Glycerolipid	TAG	58:9	18:1	18:2	22:6	TAG 18:1-18:2-22:6	C61H100O6	QKSIFFQPXZXVPR-TXZXGWCXNA-N	CCCCCC\C=C/CCCCCCCCCC(=O)OCC(COC(=O)CC\C=C/C\C=C/C\C=C/C\C=C/C\C=C/C\C=C/CC)OC(=O)CCCCCCCC\C=C/C=C\CCCCC	14.1927	946.781	[M+NH4]+	17535	77.03284:20 79.05321:92 81.06797:153 83.08492:112 91.05157:71 93.06857:82 95.08564:173 97.10071:82 105.06688:31 107.08231:61 109.09919:122 111.11258:31 117.06773:51 119.08527:61 121.09987:122 123.11727:122 128.06279:31 130.07277:10 131.08687:61 133.09918:71 135.11208:71 137.12851:51 143.09184:41 145.10045:71 147.11281:41 149.1304:92 151.14958:31 156.08594:10 157.09935:51 159.12:41 161.13206:122 1…	FALSE	TRUE	FALSE	FALSE	TRUE	TRUE	3673.75	3906.81	3355.19	6573.31	7823.88	20478	29651.8	21705.1	28458.8	33399.2	9754.12	5260.81	8399.75	7461.38	13239.8	39012.7	33524.1	24842.9	27257.5	22919.6	3.35e-05	0.0468104	0.0006882	0.0002033	0.492322	0.0002189
Glycerolipid	TAG	60:9	18:1	20:4	22:4	TAG 18:1-20:4-22:4	C63H104O6	HNLFQKIBLDESLU-BSYWFEAVNA-N	CCCCCC\C=C/CCCCCCCCCC(=O)OCC(COC(=O)CCCCCCCC\C=C/C\C=C/C\C=C/C\C=C/CC)OC(=O)CCC\C=C/C\C=C/C\C=C/C\C=C/CCCCC	14.4525	974.808	[M+NH4]+	1367	95.07733:10 107.0866:20 117.07526:10 129.07051:10 141.06355:10 169.10831:10 171.11775:31 173.1335:31 175.15172:31 183.12001:10 187.14746:20 201.16206:20 203.17816:41 219.21112:10 253.19321:10 264.24661:10 267.20886:10 269.23761:20 282.98407:10 287.24121:31 293.95615:10 301.14276:31 315.26508:20 337.27548:20 339.28137:41 340.29044:20 361.28247:20 369.28293:10 371.29739:31 389.30118:31 433.00177:10…	FALSE	TRUE	TRUE	FALSE	FALSE	TRUE	750.312	1018.19	110	650.125	532.375	1437.75	3281.88	1630.31	1625.25	2864.75	896.875	489.625	686.5	790	751.375	1596.44	3026.62	1603.5	1960.62	1631.12	0.0049639	0.517779	0.0025144	0.0174635	0.672825	0.0090945
Glycerolipid	TAG	60:11	18:1	20:4	22:6	TAG 18:1-20:4-22:6	C63H100O6	HSALVDSITWQZNS-ANQPBBKHNA-N	CCCCCC\C=C/CCCCCCCCCC(=O)OCC(COC(=O)CC\C=C/C\C=C/C\C=C/C\C=C/C\C=C/C\C=C/CC)OC(=O)CCC\C=C/C\C=C/C\C=C/C\C=C/CCCCC	14.0988	970.777	[M+NH4]+	3757	81.06638:20 81.07146:41 85.09511:10 91.05125:51 95.0798:31 105.06653:20 109.10178:41 117.06432:20 117.85332:10 119.08183:51 121.10261:31 123.1169:31 131.08487:51 133.09717:20 141.07336:20 145.10345:41 157.10425:20 161.12807:31 165.16106:10 171.11571:61 173.13145:31 175.14966:31 185.13:31 187.14536:31 189.1658:41 201.16592:51 203.18002:153 213.16411:31 215.1731:31 229.19862:31 243.21126:20 255.213…	FALSE	TRUE	TRUE	FALSE	TRUE	TRUE	413.125	1013.12	422.188	1162.75	1667.5	2950.62	3723.94	2749.81	5408.81	4614.44	5557.81	3168.94	5359.88	5745.31	6995.62	5038.38	6342.75	3499.81	4688.25	4614.31	0.0007133	0.0001558	6.43e-05	0.101187	0.200285	0.511174
Glycerolipid	TAG	60:12	18:1	20:5	22:6	TAG 18:1-20:5-22:6	C63H98O6	JYQMBTBKFXOONK-ATLRXMOJNA-N	CCCCCC\C=C/CCCCCCCCCC(=O)OCC(COC(=O)CC\C=C/C\C=C/C\C=C/C\C=C/C\C=C/C\C=C/CC)OC(=O)CCC\C=C/C\C=C/C\C=C/C\C=C/C\C=C/CC	13.9758	968.768	[M+NH4]+	8290	77.03943:20 79.05235:61 81.07092:61 83.08276:31 91.05202:102 93.0731:71 95.08197:82 97.06641:31 105.07171:61 107.07988:41 109.10264:71 111.11457:20 117.06826:41 119.08581:51 121.10352:71 129.06479:31 131.08421:92 133.10139:71 135.11758:51 143.08739:31 145.10107:51 147.11514:41 149.12758:31 153.13585:10 157.09471:31 157.10178:51 159.11354:61 163.14662:31 169.11288:31 171.11499:31 173.13258:102 175…	FALSE	TRUE	FALSE	TRUE	TRUE	TRUE	522	777.938	619.25	1023.62	1590.62	5648.25	5204.19	4158.12	6479.69	5554.06	11393	8087.56	11331.7	8348.12	13190.2	15535.7	20231.2	12538.6	16228.8	17347.1	5.2e-06	0.0004603	0.0001964	0.0013125	0.0005175	0.0058767
Glycerolipid	TAG	62:12	18:1	22:5	22:6	TAG 18:1-22:5-22:6	C65H102O6	LVFGCKMHIYKCGK-UVNBCKERNA-N	CCCCCC\C=C/CCCCCCCCCC(=O)OCC(COC(=O)CC\C=C/C\C=C/C\C=C/C\C=C/C\C=C/C\C=C/CC)OC(=O)CCCCC\C=C/C\C=C/C\C=C/C\C=C/C\C=C/CC	14.1432	996.799	[M+NH4]+	2042	79.05864:10 91.05605:20 93.08262:10 103.0553:10 105.06733:20 109.09965:20 117.06515:10 121.09568:20 145.09755:10 157.10516:31 159.12228:10 161.129:20 169.1017:10 175.15248:10 182.1084:10 187.14439:20 195.11775:31 199.14888:20 201.1609:51 207.11952:10 211.15118:20 215.18445:10 223.15044:10 227.17708:20 239.17404:20 255.21646:20 265.19568:20 295.23828:20 309.21313:10 311.23843:31 339.29037:51 365.3…	FALSE	TRUE	FALSE	FALSE	TRUE	TRUE	101.188	229.562	105.375	325.75	403.75	559.812	738.75	369.812	747.438	977.188	2824.69	2370.62	1849	2325.81	2217.38	5080.56	5140.31	4121.94	4594.94	5757.75	0.0054211	1.6e-06	3.95e-05	2.22e-05	5e-07	3.42e-05
Glycerolipid	TAG	62:13	18:1	22:6	22:6	TAG 18:1-22:6-22:6	C65H100O6	LIWGBSUBZQSLON-JFCVYCDRNA-N	CCCCCC\C=C/CCCCCCCCCC(=O)OCC(COC(=O)CC\C=C/C\C=C/C\C=C/C\C=C/C\C=C/C\C=C/CC)OC(=O)CC\C=C/C\C=C/C\C=C/C\C=C/C\C=C/C\C=C/CC	14.0699	994.785	[M+NH4]+	6014	77.03752:31 79.04916:51 81.06768:112 83.08206:61 85.10033:31 91.05261:173 93.07233:133 95.08395:153 97.06424:41 97.09899:61 103.05164:20 105.06943:92 107.08195:92 109.09884:133 111.11371:51 117.06736:112 119.0849:133 121.09794:143 123.11533:61 129.06863:71 131.08647:184 133.10042:112 135.11659:143 137.12975:31 141.06496:31 143.07791:41 145.10173:102 147.11751:82 149.12996:92 155.08591:102 157.098…	FALSE	TRUE	FALSE	FALSE	TRUE	TRUE	165.5	253.688	228	468.75	558.312	714.125	520	391.875	932.5	740.062	2163.94	1446.94	1706	1262.38	1506.38	22404.4	22988.4	16713.9	22353.1	22757.1	0.0270935	7.09e-05	5.61e-05	0.0007157	5.81e-05	6.19e-05
Glycerolipid	TAG	54:7	18:2	18:2	18:3	TAG 18:2-18:2-18:3	C57H96O6	AGCXWXCIGWPQGW-FBIPNAFWNA-N	CCCCC\C=C/C=C\CCCCCCCCC(=O)OCC(COC(=O)CCCCCCCCC\C=C/C=C\C=C/CC)OC(=O)CCCCCCCC\C=C/C=C\CCCCC	14.0275	894.752	[M+NH4]+	36036	81.0731:41 91.05163:20 95.08569:51 105.07415:10 119.08992:10 123.11729:20 133.10245:31 145.09706:20 161.14636:10 171.12347:10 173.12999:31 175.14632:41 181.15709:10 201.1743:10 217.19395:10 241.2025:10 243.20941:51 245.21799:31 259.20718:31 261.22137:102 262.21652:10 263.23416:71 311.25256:31 317.25259:31 333.2356:10 335.25525:41 337.27069:102 339.29733:31 461.31165:10 523.44971:20 545.69244:10 5…	FALSE	FALSE	FALSE	FALSE	FALSE	TRUE	5735.62	6169.62	3151.19	6889.62	7221.94	12632.1	17836.8	6020.12	8545	12447.3	83764.2	61556.6	99223.6	86357.9	147188	31624.3	44023.1	28988.3	21132.3	30210.7	0.0293429	0.0031998	0.0019188	0.0037742	0.0015626	0.0089755
Glycerolipid	TAG	56:5	18:2	18:2	20:1	TAG 18:2-18:2-20:1	C59H104O6	MZJGFVJFQXOVOT-DYVGUZTPNA-N	CCCCCCCC\C=C/CCCCCCCCCC(=O)OCC(COC(=O)CCCCCCCC\C=C/C=C\CCCCC)OC(=O)CCCCCCCC\C=C/C=C\CCCCC	14.6226	926.815	[M+NH4]+	3454	81.06944:41 95.08724:61 107.08692:31 123.11753:31 151.14641:10 163.14986:20 243.21652:20 257.23984:10 261.21964:31 263.23932:71 265.24609:20 268.9978:31 293.28018:31 337.26624:20 339.28769:31 365.32285:10 561.49792:20 563.4989:92 565.51355:41 575.50189:41 577.51416:71 589.51398:51 598.5094:21 599.50385:367 600.49915:31 601.51263:71 603.50043:20 603.51776:71 606.5683:31 627.53607:133 629.53461:454…	FALSE	TRUE	FALSE	FALSE	FALSE	TRUE	3826.56	8150.19	3025.62	7355.12	6414.19	4972.31	6679.25	2591.62	3895.5	6226	3450.5	513.812	813.688	966.188	984.5	1121.19	3363.44	1674.75	1700.38	1364.75	0.500169	0.0045561	0.0065438	0.0050021	0.0072736	0.473053
Glycerolipid	TAG	58:10	18:2	18:2	22:6	TAG 18:2-18:2-22:6	C61H98O6	HIFJUYSQDGCSIO-HEDNGCHZNA-N	CCCCC\C=C/C=C\CCCCCCCCC(=O)OCC(COC(=O)CC\C=C/C\C=C/C\C=C/C\C=C/C\C=C/C\C=C/CC)OC(=O)CCCCCCCC\C=C/C=C\CCCCC	13.9911	944.767	[M+NH4]+	17800	77.04276:20 79.05322:122 81.06798:301 83.08237:82 91.05293:102 93.06721:133 95.08566:288 97.10072:71 99.08213:31 105.07123:122 107.08377:112 109.0992:216 109.11246:10 111.11407:51 117.06774:51 119.08374:102 121.10298:163 123.10788:31 123.11571:143 129.06903:51 131.08687:92 133.08942:20 133.09756:102 135.11536:122 137.09712:31 137.13016:71 143.0834:41 145.10046:71 147.11623:82 149.09422:31 149.132…	FALSE	FALSE	FALSE	FALSE	TRUE	TRUE	1935.75	2324.12	1802.94	3738.19	4407.94	36133.9	40466.6	27503.6	49802.5	44243.9	8033.31	6379	8942.06	8257.81	13157.2	22074.4	26972.6	16217.8	15548.5	18059.6	0.0005346	0.0011862	0.0009411	0.0007281	0.0017934	0.00203
Glycerolipid	TAG	58:11	18:2	20:4	20:5	TAG 18:2-20:4-20:5	C61H96O6	OZIOZVQLZWUEAB-IGQFUTKPNA-N	CCCCC\C=C/C\C=C/C\C=C/C\C=C/CCCC(=O)OC(COC(=O)CCCCCCCC\C=C/C=C\CCCCC)COC(=O)CCC\C=C/C\C=C/C\C=C/C\C=C/C\C=C/CC	13.8285	942.751	[M+NH4]+	9554	79.05538:41 81.06762:31 82.07555:10 88.45685:10 91.05524:61 93.06411:31 95.08663:51 105.07081:31 107.08481:41 109.10024:31 115.04884:10 119.08483:31 121.09787:31 129.07658:20 131.07831:31 132.08658:10 133.10034:41 135.10995:31 143.09471:10 145.10165:31 149.12643:31 159.12125:20 163.1418:41 169.10429:10 173.12573:31 175.14764:51 183.12158:20 185.12984:61 187.14905:31 189.16757:41 199.14374:41 201.…	FALSE	FALSE	TRUE	TRUE	FALSE	TRUE	458.188	873.5	558.688	1032.69	1527.12	3365.31	4479.5	1806.38	4332.38	5302.56	23678.9	23146.2	32762.1	25521.5	34167.8	5643.69	6771.31	5585	5285.5	4772.44	0.0057713	0.000302	1.6e-06	0.0003026	0.0330384	0.0005827
Glycerolipid	TAG	60:11	18:2	20:4	22:5	TAG 18:2-20:4-22:5	C63H100O6	ZZDKXTDGVHPBPD-COUVTAKENA-N	CCCCC\C=C/C\C=C/C\C=C/C\C=C/CCCC(=O)OC(COC(=O)CCCCCCCC\C=C/C=C\CCCCC)COC(=O)CCCCC\C=C/C\C=C/C\C=C/C\C=C/C\C=C/CC	14.0894	970.794	[M+NH4]+	2757	85.06555:10 93.06996:20 95.0843:31 97.10629:10 107.0896:31 117.07533:10 119.08369:61 121.10603:10 133.10072:20 157.09743:31 165.1776:10 175.14427:20 177.16098:41 183.12001:10 187.15904:31 199.14406:31 201.16005:20 203.17815:122 209.15817:10 227.17612:20 259.23407:10 265.25662:31 269.21899:31 269.22827:102 287.22195:31 287.23389:51 311.23215:31 313.2565:51 335.24954:10 337.26492:82 339.28897:71 36…	FALSE	FALSE	TRUE	FALSE	FALSE	TRUE	364.312	1087.44	516	907.875	1296.56	2966.94	3279.88	3243.31	4794.31	3417.19	6312.12	2573.56	6669.94	1761	3029.56	2602.19	3434.94	1719.56	2925.31	2247.31	7.66e-05	0.0317692	0.0008669	0.640099	0.0592501	0.221695
Glycerolipid	TAG	58:12	18:2	20:5	20:5	TAG 18:2-20:5-20:5	C61H94O6	OSBHUMCTAPXRIE-HZSFKAAMNA-N	CCCCC\C=C/C=C\CCCCCCCCC(=O)OCC(COC(=O)CCC\C=C/C\C=C/C\C=C/C\C=C/C\C=C/CC)OC(=O)CCC\C=C/C\C=C/C\C=C/C\C=C/C\C=C/CC	13.671	940.731	[M+NH4]+	12726	73.03107:10 77.03686:71 79.05226:272 81.07082:356 83.08395:82 85.06452:41 91.05192:437 93.07027:276 95.08324:329 97.06214:61 97.09828:82 103.05809:41 105.07015:291 107.08561:224 109.10105:247 111.07877:51 115.04362:20 115.05422:61 117.06968:253 119.08723:314 121.09875:260 123.11614:112 125.09654:41 128.06004:41 129.07109:173 131.08409:438 133.10127:257 135.07646:42 135.11583:163 137.13229:82 139.…	FALSE	FALSE	FALSE	TRUE	FALSE	TRUE	126.375	254.5	118.25	188.875	166.312	197	78.125	218.625	195.25	239.5	38923.2	28779.8	50903.6	40630.2	78645.9	2376.75	3195.12	3385.31	2259.88	3630.69	0.70135	0.0051162	0.0004941	0.0051219	0.0004948	0.0063428
Glycerolipid	TAG	58:12	18:2	20:5	20:5	TAG 18:2-20:5-20:5	C61H94O6	OSBHUMCTAPXRIE-HZSFKAAMNA-N	CCCCC\C=C/C=C\CCCCCCCCC(=O)OCC(COC(=O)CCC\C=C/C\C=C/C\C=C/C\C=C/C\C=C/CC)OC(=O)CCC\C=C/C\C=C/C\C=C/C\C=C/C\C=C/CC	13.6703	940.738	[M+NH4]+	14058	77.03776:71 79.05443:184 81.07047:266 83.08617:61 83.4299:5 88.67228:5 91.05289:292 93.06854:238 95.08562:229 97.06315:51 97.10207:46 105.06976:196 107.08375:117 109.09917:133 111.07837:36 111.11703:31 115.04774:10 115.0538:31 117.06925:180 119.08219:244 121.09987:199 123.0797:46 123.11571:92 125.09611:31 128.06281:31 129.06905:102 131.08365:336 133.10083:184 135.07765:20 135.11537:133 137.09218:…	FALSE	FALSE	FALSE	TRUE	FALSE	TRUE	187.875	260.5	137.125	229.062	161.625	292.688	191.188	268.375	164.688	412.188	40079.6	36383.8	60481.8	44412.8	81211.7	2755.44	3148.25	3402.56	2330.81	4645.94	0.187239	0.0031931	0.0014199	0.0032088	0.0014686	0.0039461
Glycerolipid	TAG	60:13	18:2	20:5	22:6	TAG 18:2-20:5-22:6	C63H96O6	BJXQMCNNNOSANE-DQJAMYFDNA-N	CCCCC\C=C/C=C\CCCCCCCCC(=O)OCC(COC(=O)CC\C=C/C\C=C/C\C=C/C\C=C/C\C=C/C\C=C/CC)OC(=O)CCC\C=C/C\C=C/C\C=C/C\C=C/C\C=C/CC	13.766	966.749	[M+NH4]+	8522	77.03918:31 79.06465:10 81.07193:122 83.08508:31 91.05442:163 93.07144:82 95.08442:133 95.10093:10 105.06558:71 107.08537:102 107.09852:10 109.09934:61 115.0918:10 117.07094:82 119.08697:102 121.10157:112 123.11899:51 127.82675:10 131.08379:71 133.10097:92 135.11714:71 143.08524:61 145.09381:51 147.12151:41 149.13571:41 155.08826:41 157.0995:71 159.11659:82 161.134:82 163.1425:20 168.08461:10 169…	FALSE	FALSE	FALSE	TRUE	TRUE	TRUE	150.125	177.062	157.062	389	472.312	530.312	383.312	253.938	470.5	469.812	16070.9	11028.4	16315	12997.9	20487.7	15238.2	18059.2	18504.7	15501.5	22787.9	0.102669	0.0007141	0.0001947	0.0007474	0.0002039	0.246635
Glycerolipid	TAG	62:13	18:2	22:5	22:6	TAG 18:2-22:5-22:6	C65H100O6	OYMKSBAAXXGCJH-KXOCGYBNNA-N	CCCCC\C=C/C=C\CCCCCCCCC(=O)OCC(COC(=O)CC\C=C/C\C=C/C\C=C/C\C=C/C\C=C/C\C=C/CC)OC(=O)CCCCC\C=C/C\C=C/C\C=C/C\C=C/C\C=C/CC	13.9401	994.781	[M+NH4]+	2997	81.06445:20 81.07081:61 91.05457:31 95.08319:31 117.07565:31 119.09019:20 121.10326:31 123.12225:31 131.08714:31 135.114:20 149.09966:31 157.10315:41 159.11848:51 167.09294:20 170.09914:10 171.11269:51 173.13026:51 173.14697:10 185.12491:20 187.15181:20 197.12686:20 199.14856:31 201.15857:41 211.14879:31 213.1627:31 227.17883:41 249.18896:10 263.22531:31 267.21866:31 293.22186:31 311.23044:41 313…	FALSE	FALSE	FALSE	FALSE	TRUE	TRUE	74.4375	92.625	14.1875	380.438	190.875	606.125	461.375	442.5	892.25	755.938	2194.25	1736	1946.38	1943.94	2674.69	8374.19	10128.8	6647.06	9224.25	11161.3	0.0020646	3.5e-06	0.0002934	4.26e-05	0.0003476	0.0005934
Glycerolipid	TAG	62:14	18:2	22:6	22:6	TAG 18:2-22:6-22:6	C65H98O6	YUWQRJUAJXYGHW-RZACPUGRNA-N	CCCCC\C=C/C=C\CCCCCCCCC(=O)OCC(COC(=O)CC\C=C/C\C=C/C\C=C/C\C=C/C\C=C/C\C=C/CC)OC(=O)CC\C=C/C\C=C/C\C=C/C\C=C/C\C=C/C\C=C/CC	13.8664	992.768	[M+NH4]+	9752	77.03943:92 79.04859:51 79.05486:153 81.06837:302 83.0879:82 91.04796:11 91.05334:239 93.07172:163 95.08469:230 97.06499:31 97.09975:61 105.07021:122 107.08567:143 109.09963:153 115.04973:20 117.06972:133 117.08498:10 119.08728:173 121.10189:122 123.11774:102 128.06647:31 129.0647:61 131.0825:163 133.09804:143 135.07976:41 135.1142:71 137.13229:41 141.06923:61 143.09065:82 145.09755:143 147.0825:…	FALSE	FALSE	FALSE	FALSE	TRUE	TRUE	186.312	87.375	144.062	480.5	519.25	1138.62	1043.81	761.312	1312.19	1723.38	2319.5	1649.94	1750.75	1688.5	2529.44	36303.7	37139.9	25847.1	39104.1	39305.7	0.0010669	3.09e-05	0.0001424	0.0113046	0.0001534	0.000166
Glycerolipid	TAG	58:13	18:3	20:5	20:5	TAG 18:3-20:5-20:5	C61H92O6	ZJPWCCSJHXOCAI-TYVGRNAFNA-N	CC\C=C/C\C=C/C\C=C/C\C=C/C\C=C/CCCC(=O)OCC(COC(=O)CCCCCCCCC\C=C/C=C\C=C/CC)OC(=O)CCC\C=C/C\C=C/C\C=C/C\C=C/C\C=C/CC	13.5189	938.723	[M+NH4]+	505	81.07039:10 93.06709:20 97.10199:10 111.11991:10 119.08672:20 133.09259:31 143.0867:10 147.11615:31 157.10283:10 159.11104:31 171.12715:10 173.13368:20 175.1519:31 183.11258:31 185.14191:20 187.15347:20 189.17007:20 199.14037:20 201.16034:61 211.14653:41 244.96635:20 259.2074:10 265.21127:10 267.2186:51 285.23193:41 331.2301:10 335.25824:92 359.26953:20 572.85461:10 603.97522:10 619.47192:238 621…	FALSE	FALSE	FALSE	TRUE	FALSE	TRUE	22.5	43.5	13.75	45	25.125	0	36.625	7.75	24	0	1376.25	1395.31	2288.25	1654.81	2438.69	177.062	193.188	143	132	78.3125	0.123528	0.0012996	0.0032015	0.0012533	0.0002672	0.0015984
Glycerolipid	TAG	62:15	18:3	22:6	22:6	TAG 18:3-22:6-22:6	C65H96O6	FCPFEBOJCMRLLS-MDOAUISPNA-N	CC\C=C/C\C=C/C\C=C/C\C=C/C\C=C/C\C=C/CCC(=O)OCC(COC(=O)CCCCCCCCC\C=C/C=C\C=C/CC)OC(=O)CC\C=C/C\C=C/C\C=C/C\C=C/C\C=C/C\C=C/CC	13.6893	990.755	[M+NH4]+	1016	79.05196:31 91.05696:31 93.07401:10 105.06978:31 120.06032:10 129.06744:31 145.09877:31 159.11646:31 185.13239:20 194.10165:10 199.14639:41 201.1664:31 211.14452:51 221.13751:10 227.18507:20 268.99048:20 293.22424:31 311.23294:51 333.24365:10 335.27109:51 385.27328:31 633.43756:10 645.48218:446 646.50061:41 647.50543:41 695.46094:20 695.48694:51 946.69305:41 973.73273:51 990.73431:216	FALSE	FALSE	FALSE	FALSE	TRUE	TRUE	17	41.8125	22.875	48.4375	60	98.0625	41.375	77.8125	55.125	97	1368.44	1970.06	2387.81	2008.12	3723	1578.81	1852.62	1368.06	1778.06	1718.5	0.0319193	0.0045874	4.08e-05	0.0048544	4e-05	0.185209
Glycerolipid	TAG	62:16	20:5	20:5	22:6	TAG 20:5-20:5-22:6	C65H94O6	SPSBLRYGGKMXHD-BHFPPVJZNA-N	CC\C=C/C\C=C/C\C=C/C\C=C/C\C=C/CCCC(=O)OCC(COC(=O)CC\C=C/C\C=C/C\C=C/C\C=C/C\C=C/C\C=C/CC)OC(=O)CCC\C=C/C\C=C/C\C=C/C\C=C/C\C=C/CC	13.5772	988.735	[M+NH4]+	439	79.05121:10 81.96015:5 93.06777:15 95.08759:15 109.10571:15 115.05447:5 117.07451:20 119.08441:20 131.08113:25 145.10463:20 155.08014:5 159.11728:20 161.13469:15 169.09654:10 173.12904:20 175.14725:15 183.12119:15 185.13136:25 195.12015:5 199.15132:20 201.15935:51 203.19153:5 211.14346:20 219.20834:5 267.20132:10 267.20825:20 283.25409:5 293.22552:15 309.25363:5 311.2442:25 349.25183:5 359.26019:…	FALSE	FALSE	FALSE	TRUE	TRUE	TRUE	0	0	0	0	0	27.5	16.1875	13.25	18.5	10.75	1027	943.75	1336.69	1318.25	2576.81	324.562	291.25	322.188	279.875	279.25	0.0039227	0.0080948	7.5e-06	0.008442	2.6e-06	0.0178803
Glycerolipid	TAG	64:17	20:5	22:6	22:6	TAG 20:5-22:6-22:6	C67H96O6	JSWAQOSPCMGEOW-SGSHTMPRNA-N	CC\C=C/C\C=C/C\C=C/C\C=C/C\C=C/CCCC(=O)OCC(COC(=O)CC\C=C/C\C=C/C\C=C/C\C=C/C\C=C/C\C=C/CC)OC(=O)CC\C=C/C\C=C/C\C=C/C\C=C/C\C=C/C\C=C/CC	13.6718	1014.75	[M+NH4]+	459	81.07444:10 91.04902:20 107.08975:10 119.08082:20 123.119:10 131.0822:31 135.11226:10 145.10234:20 159.10953:31 165.13086:10 169.09772:20 173.12653:20 182.10237:10 185.12682:31 187.14987:41 195.11942:10 199.14461:20 201.16661:41 211.14679:31 213.16481:20 219.16994:10 223.1396:20 249.1646:10 267.20963:31 283.24127:10 291.21307:10 309.22037:10 348.97653:10 376.98029:10 385.27084:82 431.31958:10 661…	FALSE	FALSE	FALSE	TRUE	TRUE	TRUE	28.5625	38	22.875	76.125	47.5625	33.875	14.4375	43.75	52.25	46.125	308.375	301	312.375	443.375	667.875	1053.25	1159.5	1325.19	1105.19	2108.62	0.702685	0.0062663	0.0025413	0.0061804	0.002524	0.0018696
Glycerolipid	TAG	66:18	22:6	22:6	22:6	TAG 22:6-22:6-22:6	C69H98O6	SOFMPBOQLPVEQZ-LBUXZKOBSA-N	CC\C=C/C\C=C/C\C=C/C\C=C/C\C=C/C\C=C/CCC(=O)OCC(COC(=O)CC\C=C/C\C=C/C\C=C/C\C=C/C\C=C/C\C=C/CC)OC(=O)CC\C=C/C\C=C/C\C=C/C\C=C/C\C=C/C\C=C/CC	13.7634	1040.77	[M+NH4]+	780	77.04044:10 79.05588:41 85.06566:10 91.05309:51 105.06993:51 107.09415:10 116.06103:10 117.06484:31 119.08082:31 121.09848:41 129.07881:10 131.0838:82 133.09935:31 145.09891:31 147.11296:41 155.08299:20 161.13222:41 167.08191:20 169.09583:31 171.11629:41 173.12831:31 175.14464:31 183.1185:31 185.12866:41 187.14787:20 193.10646:10 197.13272:41 199.14848:31 201.16251:41 209.13622:31 211.14873:31 21…	FALSE	FALSE	FALSE	FALSE	TRUE	TRUE	20.0625	21.75	0	18.5	15.125	27.875	58.875	16.1875	13	18.875	50.1875	30.25	63	130.125	82.125	2721.69	2116.88	2480.69	3427.75	4292.25	0.234258	0.0281237	0.0014899	0.0479645	0.0015091	0.0015826

## Sheet: Kidney
																					Mouse_Kidney_WT_N_F1	Mouse_Kidney_WT_N_F1	Mouse_Kidney_WT_N_F1	Mouse_Kidney_WT_N_F1	Mouse_Kidney_WT_N_F1	Mouse_Kidney_WT_N_F1AA	Mouse_Kidney_WT_N_F1AA	Mouse_Kidney_WT_N_F1AA	Mouse_Kidney_WT_N_F1AA	Mouse_Kidney_WT_N_F1AA	Mouse_Kidney_WT_N_F1EPA	Mouse_Kidney_WT_N_F1EPA	Mouse_Kidney_WT_N_F1EPA	Mouse_Kidney_WT_N_F1EPA	Mouse_Kidney_WT_N_F1EPA	Mouse_Kidney_WT_N_F1DHA	Mouse_Kidney_WT_N_F1DHA	Mouse_Kidney_WT_N_F1DHA	Mouse_Kidney_WT_N_F1DHA	Mouse_Kidney_WT_N_F1DHA
Lipid super class	Lipid class	Total chain	SN1 chain	SN2 chain	SN3 chain	Name	Formula	Representative InChIKey	Representative SMILES	RT[min]	m/z	Adduct	Average intensity	MSMS	Saturated	Mono unsaturated	Arachidonic acid	Eicosapentaenoic acid	Docosapentaenoic acid	PUFAs	160827_Kidney_normal_Neg_01	160827_Kidney_normal_Neg_02	160827_Kidney_normal_Neg_03	160827_Kidney_normal_Neg_04	160827_Kidney_normal_Neg_05	160827_Kidney_EPA_Neg_06	160827_Kidney_EPA_Neg_07	160827_Kidney_EPA_Neg_08	160827_Kidney_EPA_Neg_09	160827_Kidney_EPA_Neg_10	160827_Kidney_AA_Neg_16	160827_Kidney_AA_Neg_17	160827_Kidney_AA_Neg_18	160827_Kidney_AA_Neg_19	160827_Kidney_AA_Neg_20	160827_Kidney_DHA_Neg_11	160827_Kidney_DHA_Neg_12	160827_Kidney_DHA_Neg_13	160827_Kidney_DHA_Neg_14	160827_Kidney_DHA_Neg_15	Q-values (Control vs ARA)	Q-values (Control vs EPA)	Q-values (Control vs DHA)	Q-values (ARA vs EPA)	Q-values (ARA vs DHA)	Q-values (EPA vs DHA)
Acyl carnitine	ACar	14:0	14:0			ACar 14:0	C21H42NO4	PSHXNVGSVNEJBD-UHFFFAOYNA-O	CCCCCCCCCCCCCC(=O)OC(CC(O)=O)C[N+](C)(C)C	5.32183	372.312	[M]+	1396	85.02592:148 120.97392:5 163.56093:5 372.31049:31	TRUE	FALSE	FALSE	FALSE	FALSE	FALSE	1349.81	4504.31	1843.75	1642.31	1116.56	1208	994.938	1120.06	1103.19	1935.69	1254.81	1082.56	1234.94	1884.69	921.812	1240.5	1218.62	903.688	718.25	640.062	0.260545	0.26179	0.1365	0.988872	0.156607	0.145172
Acyl carnitine	ACar	16:0	16:0			ACar 16:0	C23H46NO4	XOMRRQXKHMYMOC-UHFFFAOYNA-O	CCCCCCCCCCCCCCCC(=O)OC(CC(O)=O)C[N+](C)(C)C	6.0665	400.342	[M]+	8280	81.07229:10 85.02832:625 137.12813:10 144.10254:41 239.24174:31 341.27478:71 400.33847:102 400.34695:133	TRUE	FALSE	FALSE	FALSE	FALSE	FALSE	8644.94	17949.3	10505.8	12017.8	8041.62	5785.44	5536.94	7723.56	7338.19	11943.6	7587.56	7895.62	9071.38	10687.1	5327.81	6157.69	8311.38	5611.69	5151.88	4302.62	0.112735	0.132644	0.0195421	0.765213	0.2237	0.0823066
Acyl carnitine	ACar	16:1	16:1			ACar 16:1	C23H44NO4	NRCCZFJHTDUMBS-SEYXRHQNNA-O	CCCCCCCC\C=C/CCCCCC(=O)OC(CC(O)=O)C[N+](C)(C)C	5.55742	398.324	[M]+	1081	71.04527:2 85.02782:61 125.0999:2 137.13429:2 275.20047:2 398.323:12	FALSE	TRUE	FALSE	FALSE	FALSE	FALSE	947.125	1651.5	1403.75	1506	1253.81	1171.12	898.562	999.75	949.375	1103.81	932.5	981.938	993.312	1352.06	838.375	988.625	1038.44	926.125	779.125	906.375	0.0359995	0.0557016	0.0106106	0.962495	0.183562	0.375218
Acyl carnitine	ACar	18:0	18:0			ACar 18:0	C25H50NO4	FNPHNLNTJNMAEE-UHFFFAOYNA-O	CCCCCCCCCCCCCCCCCC(=O)OC(CC(O)=O)C[N+](C)(C)C	6.72937	428.37	[M]+	3575	81.07107:10 85.02967:184 104.99108:10 260.9006:10 352.88123:10 428.38736:51	TRUE	FALSE	FALSE	FALSE	FALSE	FALSE	3161.12	5098.44	6423.19	4790.06	2753.69	3757	2693.38	2371.44	4003.62	3688.75	4166.56	3191.5	2950.5	5523.75	3923.62	2199.31	2972.31	3315.81	2273.12	2240	0.162903	0.557965	0.0312571	0.277201	0.113741	0.0286546
Acyl carnitine	ACar	18:1	18:1			ACar 18:1	C25H48NO4	HOAMADDCQBUDDY-KHPPLWFENA-O	CCCCCC\C=C/CCCCCCCCCC(=O)OC(CC(O)=O)C[N+](C)(C)C	6.21169	426.358	[M]+	3529	85.02863:107 97.06286:10 426.35135:46	FALSE	TRUE	FALSE	FALSE	FALSE	FALSE	5296.81	8345.44	6451.06	6111.44	4261.75	2473	2102.38	2690.69	2667.94	4581.38	2631.25	2639.5	3146.69	4738.94	1889.31	2251.25	3106.62	1859.12	1719.56	1607.62	0.0041346	0.0058562	0.0006051	0.873218	0.158785	0.139588
Acyl carnitine	ACar	18:2	18:2			ACar 18:2	C25H46NO4	HQMPRWWWVKTZAS-HULFFUFUNA-O	CCCCC\C=C\C=C\CCCCCCCCC(=O)OC(CC(O)=O)C[N+](C)(C)C	5.76755	424.341	[M]+	3406	85.02677:153 97.10535:20 408.94949:10 424.34769:82	FALSE	FALSE	FALSE	FALSE	FALSE	TRUE	4013.12	6847.5	4460.5	5085.25	3477.69	1705.81	1815.75	2134.44	2487.25	3596.88	3241.19	2334.75	3107.5	4185.38	2533.56	3630.69	4571.75	2779.88	3151.38	2961.56	0.006924	0.0342193	0.0750953	0.15796	0.0514446	0.479373
Acyl carnitine	ACar	20:4	20:4			ACar 20:4	C27H46NO4	RBFQHRALHSUPIA-WFYBHXQRNA-O	CCCCC\C=C\C\C=C\C\C=C\C\C=C\CCCC(=O)OC(CC(O)=O)C[N+](C)(C)C	5.75816	448.342	[M]+	3549	79.0547:51 81.0695:41 85.02551:250 91.05204:20 93.06908:41 95.08206:31 104.06061:10 119.08788:20 144.10788:41 151.14618:10 159.12555:10 424.36523:10 448.34171:204	FALSE	FALSE	TRUE	FALSE	FALSE	TRUE	4801.88	6072.5	3622.88	5458.94	3510.44	5035.25	5789.25	5698.75	6502.38	9059.75	1316.81	1118.69	1921.06	2253.62	1447.94	1411.62	1843.81	1219.81	1546.75	1345.69	0.0805094	0.0004708	0.0024623	0.0015415	0.001872	0.570798
Acyl carnitine	ACar	20:5	20:5			ACar 20:5	C27H44NO4	USUPQTJPNBGUSJ-WMPRHZDHNA-O	CC\C=C/C\C=C/C\C=C/C\C=C/C\C=C/CCCC(=O)OC(CC(O)=O)C[N+](C)(C)C	5.35877	446.327	[M]+	819	79.04845:10 79.05472:24 79.06475:3 81.07205:20 85.02939:58 89.05838:3 91.05197:17 93.06898:20 95.08058:7 104.06331:3 105.0848:3 107.08436:14 115.05602:3 119.09372:7 129.07152:7 131.10231:7 135.12616:3 144.10396:10 147.11394:7 157.04758:7 161.13338:10 168.09137:3 175.14787:7 181.09988:3 201.13025:3 382.85306:3 446.30264:14 446.32053:58	FALSE	FALSE	FALSE	TRUE	FALSE	TRUE	212.312	362.25	200.438	223.125	188	106.562	107	105.125	76.0625	157.562	1788.44	1481.75	2086.81	2408.38	1908.12	1127.12	1098.62	679	1101.12	960.438	0.0061869	0.0002687	2.98e-05	0.0002722	0.0003747	0.0006716
Acyl carnitine	ACar	22:6	22:6			ACar 22:6	C29H46NO4	WLLMYDQRCSWAST-BUHCESQUNA-O	CC\C=C\C\C=C\C\C=C\C\C=C\C\C=C\C\C=C\CCC(=O)OC(CC(O)=O)C[N+](C)(C)C	5.70093	472.341	[M]+	1172		FALSE	FALSE	FALSE	FALSE	TRUE	TRUE	831.062	1035.19	699.938	1051.69	639.125	510.688	381.062	499.625	694.75	583.25	1084.19	780.562	789.438	1308.81	1658.19	2035.19	3329.5	2057.31	1560.56	1917.12	0.0124237	0.180972	0.0095912	0.0208199	0.0048514	0.0152896
Phospholipid	BMP	44:12	22:6	22:6		BMP 22:6-22:6	C50H75O10P	FMHFZIDTIQEZJJ-GZSOIYOPNA-N	CC\C=C/C\C=C/C\C=C/C\C=C/C\C=C/C\C=C/CCC(=O)OC(CO)COP(O)(=O)OCC(CO)OC(=O)CC\C=C/C\C=C/C\C=C/C\C=C/C\C=C/C\C=C/CC	7.83172	884.542	[M+NH4]+	4296	77.03577:18 79.05118:80 81.06847:73 83.04816:12 83.0816:6 91.05355:98 93.07059:100 95.08495:61 97.06388:12 103.03559:4 105.06915:67 107.04811:6 107.08461:51 109.06322:12 109.10006:27 111.04062:4 111.12836:2 115.05022:8 117.06261:12 117.06719:53 119.08475:82 121.0978:39 123.0792:6 123.11521:8 127.07116:6 128.06233:6 129.05736:18 129.06699:20 131.08481:61 133.10202:45 135.11496:22 137.09508:8 141.0…	FALSE	FALSE	FALSE	FALSE	TRUE	TRUE	2422.62	2137.81	1959.69	2625.38	2465.88	916.5	1119.69	577.125	1140.19	1015	2741.19	2265.25	4935.38	3655.38	3495.75	9841.44	10525.2	11081.9	11942.1	9048.44	2.42e-05	0.0725899	4.18e-05	0.0047108	2.56e-05	6e-06
Phospholipid	BMP	42:10	20:4	22:6		BMP 20:4-22:6	C48H75O10P	AUTHWUWXNBGLGD-GGLIIMCGNA-N	CC\C=C/C\C=C/C\C=C/C\C=C/CCCCCCC(=O)OC(CO)COP(O)(=O)OCC(CO)OC(=O)CC\C=C/C\C=C/C\C=C/C\C=C/C\C=C/C\C=C/CC	7.87435	860.536	[M+NH4]+	457	79.05395:20 81.07001:25 91.05117:10 93.07091:31 105.07096:20 119.08364:20 121.09824:20 129.05304:15 133.10252:20 141.07227:5 143.09204:15 145.10748:5 147.11307:15 155.0955:5 159.11153:10 159.11508:20 159.46231:5 161.13072:10 171.11673:25 173.13065:20 185.13699:15 187.14661:20 201.16339:20 203.17751:31 213.16577:10 249.1505:5 250.24962:15 262.25522:92 267.21368:5 269.22397:41 277.21594:5 287.23932…	FALSE	FALSE	TRUE	FALSE	TRUE	TRUE	569.125	576.375	462.062	621.125	636.125	788.5	1468	833.75	1191.38	1299.06	14.6875	13.1875	253.25	92.8125	9.75	56.625	91.4375	62.1875	77.4375	26.625	0.0131933	2.04e-05	3e-07	7.57e-05	0.0012907	0.785761
Phospholipid	BMP	40:8	18:2	22:6		BMP 18:2-22:6	C46H75O10P	VZNVSSRNAYGTMV-LNYCXSEGNA-N	CCCCC\C=C/C\C=C/CCCCCCCC(=O)OC(CO)COP(O)(=O)OCC(CO)OC(=O)CC\C=C/C\C=C/C\C=C/C\C=C/C\C=C/C\C=C/CC	7.89526	836.541	[M+NH4]+	1201	251.18938:5 337.27396:268 361.25189:10 361.27872:36 385.26907:153 387.285:20 559.48181:5 651.51135:15 651.54016:20 771.45679:5 777.58618:10 836.54126:15	FALSE	FALSE	FALSE	FALSE	TRUE	TRUE	1891.31	1794.25	1374.38	1831.38	2147.12	1322.94	1632.12	1169.88	1312.31	1852.81	704.938	806.938	1055.06	839.125	704.625	800.875	722.688	885.562	633.062	528.938	0.0821542	0.0001093	5.03e-05	0.0018799	0.0006857	0.262328
Cholesterol ester	CE	18:2	18:2			CE 18:2	C45H76O2	NAACPBBQTFFYQB-LJAITQKLSA-N	CCCCC\C=C/C\C=C/CCCCCCCC(=O)O[C@H]1CC[C@]2(C)[C@H]3CC[C@]4(C)[C@H](CC[C@H]4[C@@H]3CC=C2C1)[C@H](C)CCCC(C)C	14.5206	666.614	[M+NH4]+	12343	71.08486:51 79.05604:31 81.06958:102 83.08015:41 83.09173:20 91.05744:10 95.08755:82 97.0971:41 105.06611:51 105.08202:10 107.08592:61 109.09991:112 111.11929:51 119.08307:61 121.10078:61 133.10353:51 134.08197:10 135.11975:133 137.12634:31 147.10725:51 147.11752:194 149.13173:82 151.14748:51 161.13179:265 163.14751:61 163.16013:20 175.13876:31 175.15182:173 177.16112:51 179.17619:51 181.19316:10…	FALSE	FALSE	FALSE	FALSE	FALSE	TRUE	13475.7	24510.4	25762.4	24927.5	15175	4023.56	3584.44	4815.56	4773.19	7016.69	9566	10012.3	7706.69	9218.75	8179.81	13495.8	17856.6	15331.6	15628.7	11798.4	0.0031337	0.0103843	0.069839	0.0005126	2.98e-05	0.0007356
Cholesterol ester	CE	20:4	20:4			CE 20:4	C47H76O2	IMXSFYNMSOULQS-BEDFLICRSA-N	CCCCC\C=C/C\C=C/C\C=C/C\C=C/CCCC(=O)O[C@H]1CC[C@]2(C)[C@H]3CC[C@]4(C)[C@H](CC[C@H]4[C@@H]3CC=C2C1)[C@H](C)CCCC(C)C	14.3917	690.615	[M+NH4]+	14354	71.08337:41 79.05447:41 81.07054:92 83.08627:51 93.07011:61 95.08859:122 97.10093:61 103.05228:10 105.06576:61 107.0812:92 109.09956:214 111.11447:61 119.08733:61 121.09885:92 121.11594:10 123.11941:92 133.09827:82 135.11609:155 137.12927:51 145.10474:21 147.11371:264 149.13306:122 159.11397:51 161.13318:363 163.1507:71 165.16446:102 165.82695:10 173.12946:41 175.14581:224 177.1776:10 179.17766:1…	FALSE	FALSE	TRUE	FALSE	FALSE	TRUE	13740.7	23507.8	17204.2	24974.2	13511.9	25387.4	25030.8	33201.6	38766.6	43441.4	2636.94	2983.25	3842.81	3914.69	3216.19	1932.19	3030.44	2125.12	2968.5	1668.5	0.010152	0.0030202	0.0023571	0.0011575	0.0010145	0.0304175
Cholesterol ester	CE	20:5	20:5			CE 20:5	C47H74O2	XZFUGMCJZFRBKF-BDJFIEMMSA-N	CC\C=C/C\C=C/C\C=C/C\C=C/C\C=C/CCCC(=O)O[C@H]1CC[C@]2(C)[C@H]3CC[C@]4(C)[C@H](CC[C@H]4[C@@H]3CC=C2C1)[C@H](C)CCCC(C)C	14.1456	688.602	[M+NH4]+	3219	79.05374:10 83.08293:31 93.08424:10 95.08637:82 97.10564:10 105.06629:31 109.10011:82 119.0894:31 121.09939:31 121.1056:20 123.12933:10 133.10205:31 135.11662:71 147.10739:20 147.11766:102 149.12842:51 161.13011:112 163.14581:31 173.13739:10 175.14818:102 179.18382:41 187.14972:41 189.16438:41 193.1888:31 201.17256:51 203.17868:61 205.1907:51 215.1801:61 215.1946:20 219.21393:41 221.23439:10 229.…	FALSE	FALSE	FALSE	TRUE	FALSE	TRUE	458.5	592.812	867.688	535.938	482.25	149.812	268.312	149.5	156.688	122.312	9503.56	9149.12	10940.2	8587.12	8145.56	2594.38	3462.44	2934.5	3386	1884.94	0.0006804	4.07e-05	0.0009687	4.37e-05	0.0007028	3e-06
Cholesterol ester	CE	22:6	22:6			CE 22:6	C49H76O2	VOEVEGPMRIYYKC-HNJOWPRISA-N	CC\C=C/C\C=C/C\C=C/C\C=C/C\C=C/C\C=C/CCC(=O)O[C@H]1CC[C@]2(C)[C@H]3CC[C@]4(C)[C@H](CC[C@H]4[C@@H]3CC=C2C1)[C@H](C)CCCC(C)C	14.2927	714.615	[M+NH4]+	4915	79.05415:10 81.0702:82 93.06968:51 95.08402:82 95.09641:10 105.06524:31 109.10049:82 119.08516:41 121.09821:41 121.11063:10 123.11405:61 133.10078:41 135.11206:92 145.1039:10 147.11458:163 149.13219:51 153.18071:10 161.12148:31 161.12863:153 163.14792:31 165.16347:31 166.65182:10 175.13727:41 175.14473:122 177.16336:41 179.17844:41 187.14806:61 189.153:31 189.15688:61 193.19495:61 201.1608:71 203…	FALSE	FALSE	FALSE	FALSE	TRUE	TRUE	2832.94	4683.5	3300.5	4246.69	2887.5	1393.75	1714.5	1822.75	1581.94	2029.88	3127.06	2929.62	3997.56	3823.25	3003.5	7327.31	12590.3	11992.8	13107.6	9907.12	0.0056172	0.635013	0.0001767	0.0001438	0.0008869	0.0015969
Ceramide	Cer-AS	d40:1	d18:1	22:0		Cer-AS d18:1/22:0	C40H79NO4	FCCZDEAAQZWMGI-NWBJSICCNA-N	CCCCCCCCCCCCCCCCCCCCC(O)C(=O)NC(CO)C(O)\C=C\CCCCCCCCCCCCC	12.9271	696.608	[M+Hac-H]-	1438	237.22968:71 239.23326:61 250.25407:51 263.22806:20 264.24774:10 268.26071:61 280.259:41 290.25333:31 298.272:51 309.31384:204 326.27835:31 337.30386:61 354.32104:20 354.33698:51 355.3204:82 362.33643:71 380.34854:184 396.34711:61 398.36377:31 572.58417:10 588.56964:122 604.54968:41 604.58093:31 606.56354:31 618.58014:61 636.59644:1390	TRUE	FALSE	FALSE	FALSE	FALSE	FALSE	1351.06	1319.12	1411.31	1594.5	1426	1147.88	1136.81	1364.31	1522.25	1365.56	1115.75	1015.06	1574.88	1433.06	1314.69	1576.25	1506.06	1694.75	1522.81	2360	0.23205	0.282675	0.125429	0.89766	0.0426789	0.0488485
Ceramide	Cer-AS	d42:1	d18:1	24:0		Cer-AS d18:1/24:0	C42H83NO4	WAYLDHLWVYQNSQ-JMUUFCRMNA-N	CCCCCCCCCCCCCCCCCCCCCCC(O)C(=O)NC(CO)C(O)\C=C\CCCCCCCCCCCCC	13.2158	724.644	[M+Hac-H]-	1599	178.06354:41 216.98915:20 217.00369:51 237.22067:31 255.23804:41 267.22601:143 279.23203:51 285.09567:10 295.25751:31 295.27448:31 298.25693:20 299.00305:31 314.9696:20 328.98505:41 337.33701:71 353.00699:31 365.3367:41 366.38657:41 381.0224:31 382.36765:41 383.34775:51 390.36063:20 394.36572:31 408.38052:204 424.37357:31 616.58368:51 616.59772:41 632.57507:20 634.58173:31 644.55872:10 646.65967:…	TRUE	FALSE	FALSE	FALSE	FALSE	FALSE	1245.31	1026.94	1170.12	1628.94	1439.88	1338.94	1205.25	1649.31	1529	1634	1416.44	1522.19	1738.56	1567.5	1726.69	2553.62	1964.19	1646.19	1662.94	2321.44	0.250215	0.043702	0.0081684	0.280394	0.0231931	0.0510612
Ceramide	Cer-NDS	d34:0	d18:0	16:0		Cer-NDS d18:0/16:0	C34H69NO3	GCGTXOVNNFGTPQ-UHFFFAOYNA-N	CCCCCCCCCCCCCCCC(O)C(CO)NC(=O)CCCCCCCCCCCCCCC	10.0847	598.537	[M+Hac-H]-	1788	235.20825:10 237.2207:102 239.23735:61 255.23128:61 280.26093:236 296.2645:51 300.28775:20 490.49786:122 506.47559:51 520.49554:21 536.81995:21 538.51141:498	TRUE	FALSE	FALSE	FALSE	FALSE	FALSE	2134.19	2266.19	1869.5	1642	2270.69	1964.56	1028.38	2155.81	1789.38	1389.62	1637.38	2013.62	1792.12	1846.88	1618.56	1817.19	2047.75	1465.38	1548.88	1463.94	0.156887	0.111615	0.059855	0.605298	0.989816	0.42921
Ceramide	Cer-NP	t40:0	t18:0	22:0		Cer-NP t18:0/22:0	C40H81NO4	CIMNZQFRNXDRER-UHFFFAOYNA-N	CCCCCCCCCCCCCCCCCCCCCC(=O)NC(CO)C(O)C(O)CCCCCCCCCCCCCC	12.8408	698.624	[M+Hac-H]-	3598	225.22379:36 253.22011:25 255.23363:112 257.45432:5 267.23306:430 279.23929:36 280.24463:20 280.25644:41 284.26501:15 316.28598:25 321.30945:46 323.336:25 338.34106:204 339.32803:359 351.32339:15 352.35028:41 352.36353:25 353.3389:20 362.34167:20 364.35617:189 376.34692:25 380.35123:184 382.36819:579 394.36633:477 572.56409:36 602.58795:127 606.56036:36 608.59149:15 620.57886:36 620.59991:51 638.…	TRUE	FALSE	FALSE	FALSE	FALSE	FALSE	4069.38	3932.19	3637.94	4235.25	4198.81	2982.5	2661	3578.88	3565.88	3376	2663	3232.56	4058.31	3280.12	3565.75	3726.81	4349.94	3702.94	3460.06	3687.56	0.0057234	0.0318349	0.248528	0.672528	0.0450777	0.156735
Ceramide	Cer-NP	t41:0	t18:0	23:0		Cer-NP t18:0/23:0	C41H83NO4	MBPABCUJJLJOFM-UHFFFAOYNA-N	CCCCCCCCCCCCCCCCCCCCCCC(=O)NC(CO)C(O)C(O)CCCCCCCCCCCCCC	13.0551	712.64	[M+Hac-H]-	2587	223.20604:10 225.21739:51 251.22786:10 255.23576:122 267.23062:486 279.23203:41 280.25388:41 284.25528:31 335.31866:61 335.55643:10 352.35254:255 353.32788:303 366.37042:71 376.36288:31 378.37479:235 390.36072:20 392.35092:21 394.36301:258 395.12833:21 396.38306:681 404.3786:10 406.36435:21 408.34641:83 408.38632:649 410.40192:21 586.58502:51 602.61444:10 616.58752:133 620.58112:61 620.64441:10 6…	TRUE	FALSE	FALSE	FALSE	FALSE	FALSE	3315.44	2550.75	2337.19	2770.25	3427.94	2227.38	1952.56	2242.31	2234.62	2658.56	1909.94	2614.38	2940.94	2347.25	2854.5	3052.81	2788.25	1941.19	2669.5	2897.94	0.0335123	0.255426	0.484627	0.25103	0.106187	0.62492
Ceramide	Cer-NP	t42:0	t18:0	24:0		Cer-NP t18:0/24:0	C42H85NO4	ZESJDNWGTANZCC-UHFFFAOYNA-N	CCCCCCCCCCCCCCCCCCCCCCCC(=O)NC(CO)C(O)C(O)CCCCCCCCCCCCCC	13.1771	726.656	[M+Hac-H]-	8463	225.21786:51 253.78215:10 255.2363:143 259.53046:21 267.23349:510 279.23969:41 280.26157:71 284.25351:31 295.25815:20 316.29138:41 338.34662:31 349.34302:82 351.36871:31 366.37662:322 367.35495:510 380.3956:71 381.3649:51 382.36026:20 392.38812:163 398.93594:20 405.37317:41 408.3815:401 409.38867:21 410.39993:895 418.73123:22 421.07611:43 422.40323:747 600.61542:61 618.58405:41 630.60162:267 634.…	TRUE	FALSE	FALSE	FALSE	FALSE	FALSE	9187.88	7277.12	7476.25	9842.06	9009.81	7546.25	6245.56	6665.69	9301.62	8486.06	6530.19	7855.69	8950.25	8056.5	9285.69	10161.8	8693.5	9969.38	9476.69	9239.62	0.263478	0.56064	0.132715	0.53063	0.0174525	0.0369032
Ceramide	Cer-NP	t42:1	t18:0	24:1		Cer-NP t18:0/24:1	C42H83NO4	DNXQPFZSRNGGHL-DQRAZIAONA-N	CCCCCCCCCCCCCCC(O)C(O)C(CO)NC(=O)CCCCCCCCC\C=C/CCCCCCCCCCCC	12.8504	724.643	[M+Hac-H]-	3012	225.21359:41 255.22954:143 259.35092:10 263.23511:31 267.23349:460 279.23499:51 280.2663:41 314.97537:20 316.2814:31 346.24863:10 347.32593:51 349.34576:51 364.35666:204 365.33771:308 378.36203:41 388.3877:20 390.36172:133 406.3512:92 406.36542:214 407.10812:31 408.38455:581 410.90909:11 420.38461:518 598.59808:51 610.58826:10 614.61139:10 628.59119:143 632.60925:71 646.61169:82 662.52045:22 664.…	FALSE	TRUE	FALSE	FALSE	FALSE	FALSE	3608.94	3157.44	3031.94	4393.25	3777.88	2588.38	2065.12	2633	3228.56	2978.38	2342.88	2649.5	4059.62	2950.56	2776.12	3149.69	3166.56	2480.06	2582.56	2618.25	0.0210742	0.132268	0.0234634	0.487681	0.693615	0.647012
Ceramide	Cer-NS	d33:1	d17:1	16:0		Cer-NS d17:1/16:0	C33H65NO3	KXVLPPCAUYSNGY-BYCLXTJYNA-N	CCCCCCCCCCCCCCCC(=O)NC(CO)C(O)\C=C\CCCCCCCCCCCC	9.35713	582.504	[M+Hac-H]-	858	217.04103:10 223.19968:31 237.2184:51 241.21857:20 249.23683:31 254.24252:20 255.24243:20 280.26318:102 474.45651:31 492.45285:31 492.48105:31 522.48358:173	TRUE	FALSE	FALSE	FALSE	FALSE	FALSE	753.875	862.812	935.25	971.062	973.438	809.188	1096.69	1079.88	993.25	902.062	497.688	677.375	736.125	873.625	720.812	1037.12	714.125	968.812	709	848.125	0.292856	0.0270772	0.589498	0.0096033	0.195579	0.123414
Ceramide	Cer-NS	d30:1	d18:1	12:0		Cer-NS d18:1/12:0	C30H59NO3	HXFPPRPLRSPNIB-WJTDDFOZNA-N	CCCCCCCCCCCCC\C=C\C(O)C(CO)NC(=O)CCCCCCCCCCC	8.44508	540.46	[M+Hac-H]-	55564	80.02696:31 95.04816:31 179.14563:82 181.16066:1542 183.17743:32 197.18904:508 198.18494:1096 199.16544:744 212.20384:61 222.18451:41 223.50305:41 224.19971:6430 235.20786:71 236.48631:32 237.22464:1868 238.17528:93 239.24567:104 240.19597:702 242.20982:82 249.2254:20 250.24664:112 255.23087:41 261.21432:31 263.23413:1257 265.25021:53 266.25311:373 268.25992:383 278.24924:31 281.23456:31 296.2470…	TRUE	FALSE	FALSE	FALSE	FALSE	FALSE	53666.3	52665.8	57784.6	54900.9	57619.8	47740.7	48068.2	53149.9	61052.5	57229.5	54314	50878.1	60274.2	52449.9	55739.9	57488.2	59809.2	59308.1	62568.6	54564.8	0.518729	0.76339	0.0761442	0.684789	0.10562	0.0904445
Ceramide	Cer-NS	d34:1	d18:1	16:0		Cer-NS d18:1/16:0	C34H67NO3	YDNKGFDKKRUKPY-ORIPQNMZNA-N	CCCCCCCCCCCCCCCC(=O)NC(CO)C(O)\C=C\CCCCCCCCCCCCC	9.77521	596.521	[M+Hac-H]-	49367	91.53146:10 235.21127:71 237.22156:3380 239.23384:82 250.2569:143 251.23999:41 253.25237:224 254.24808:1088 255.23671:831 263.23779:1093 266.24759:245 268.26132:353 278.23184:31 278.24362:41 279.37451:71 280.26434:6492 281.24548:65 294.24597:51 295.24643:31 296.25586:975 298.27261:133 461.46802:31 488.48001:763 491.96646:10 502.9368:10 504.47266:771 506.48389:1240 508.51187:31 518.48431:82 534.80…	TRUE	FALSE	FALSE	FALSE	FALSE	FALSE	48236.9	48051.9	54316.7	57777.8	54732.3	51872.3	55247.8	52839.2	57137.2	63573.1	36500.6	43986.8	42321.4	53656.1	38047.4	45241.8	46457.3	53416.6	41277.3	42641.1	0.249908	0.0263128	0.044124	0.006827	0.0082248	0.452779
Ceramide	Cer-NS	d36:1	d18:1	18:0		Cer-NS d18:1/18:0	C36H71NO3	VODZWWMEJITOND-OWWNRXNENA-N	CCCCCCCCCCCCCCCCCC(=O)NC(CO)C(O)\C=C\CCCCCCCCCCCCC	10.832	624.551	[M+Hac-H]-	1512	237.21854:71 263.23221:61 265.2529:82 266.24887:41 282.28174:51 283.26166:61 298.26407:10 308.30151:225 324.28244:51 489.50089:10 516.49799:31 532.49298:41 534.52338:82 562.77197:10 564.53406:379	TRUE	FALSE	FALSE	FALSE	FALSE	FALSE	1589.25	1461.31	1533.81	1460.88	1692.5	1469.38	1141.75	1686.75	1652.94	1776.12	1241.06	1574.56	1584.19	1466.88	1573.31	1450.62	1727	1512.38	1235.94	1409.75	0.986145	0.470007	0.401107	0.671006	0.585865	0.844495
Ceramide	Cer-NS	d38:1	d18:1	20:0		Cer-NS d18:1/20:0	C38H75NO3	XWBWIAOWSABHFI-QOSDPKFLNA-N	CCCCCCCCCCCCCCCCCCCC(=O)NC(CO)C(O)\C=C\CCCCCCCCCCCCC	12.2626	652.583	[M+Hac-H]-	2384	235.19743:5 237.21854:82 249.21915:5 263.23917:61 266.24207:15 268.26498:15 293.28488:112 308.30423:10 309.31586:20 310.3093:97 311.28937:41 336.32709:246 352.32336:51 544.53369:36 560.54956:46 562.51562:10 562.53906:71 592.56317:565	TRUE	FALSE	FALSE	FALSE	FALSE	FALSE	2832.75	2634.31	2281.69	2439.44	2957.19	2252	2069.62	2280.38	2751.88	2272.69	1725.5	2217.19	2434.06	2303.56	2104.19	2176.62	2480.44	2974.5	2305.88	2184.19	0.107891	0.0256972	0.319634	0.338876	0.610095	0.199075
Ceramide	Cer-NS	d39:1	d18:1	21:0		Cer-NS d18:1/21:0	C39H77NO3	FWXJRGLCUAXNLA-NWBJSICCNA-N	CCCCCCCCCCCCCCCCCCCCC(=O)NC(CO)C(O)\C=C\CCCCCCCCCCCCC	12.901	666.598	[M+Hac-H]-	1069	211.20454:10 223.21471:31 237.21873:31 249.2216:20 255.23607:10 263.24173:31 307.29709:41 321.31714:20 324.33655:41 338.34634:20 339.32553:20 350.33768:122 364.34818:61 366.32773:20 376.9823:10 510.93228:10 558.56146:41 574.55084:31 606.58093:332 606.65393:10 638.58093:10	TRUE	FALSE	FALSE	FALSE	FALSE	FALSE	1104.94	1213.62	1084.25	1193.25	1335.88	861.688	879.438	1125.5	1237.19	939.25	745.375	1184.44	1155.19	975.562	1013.88	1018.75	1098.31	1140.5	956.812	1122.5	0.0735542	0.0938571	0.068758	0.954931	0.491559	0.55679
Ceramide	Cer-NS	d40:1	d18:1	22:0		Cer-NS d18:1/22:0	C40H79NO3	KEPQASGDXIEOIL-LAPDZXRHNA-N	CCCCCCCCCCCCCCCCCCCCCC(=O)NC(CO)C(O)\C=C\CCCCCCCCCCCCC	13.0836	680.614	[M+Hac-H]-	35499	95.04713:41 225.22188:31 235.19978:82 237.22089:2234 239.23753:92 250.23833:41 250.25395:122 251.22809:41 255.21796:31 262.40671:54 263.23706:1872 265.25546:61 266.24683:299 268.26517:341 281.23996:71 289.93106:10 291.2612:51 293.28506:51 298.2742:173 310.31195:51 311.297:41 319.29669:51 321.28653:72 321.31689:2792 323.32571:42 336.32983:163 337.34756:235 338.33826:2248 339.29922:88 339.32523:166…	TRUE	FALSE	FALSE	FALSE	FALSE	FALSE	38574.4	34257.7	38129.6	40387.2	38735.3	34552.2	25461	34811.7	34174.2	34708.9	26411.3	32905.8	43861.8	33483.8	33163.1	31356.4	38442.1	42868.3	36571.5	37131	0.035362	0.211006	0.733468	0.723846	0.118865	0.35299
Ceramide	Cer-NS	d41:1	d18:1	23:0		Cer-NS d18:1/23:0	C41H81NO3	NAJHAHQNQCNWOP-JMUUFCRMNA-N	CCCCCCCCCCCCCCCCCCCCCCC(=O)NC(CO)C(O)\C=C\CCCCCCCCCCCCC	13.2032	694.63	[M+Hac-H]-	19441	202.98763:41 216.99577:31 223.20857:102 235.21078:41 237.22105:1008 239.2399:51 249.22397:71 250.25191:71 251.23499:41 252.23567:41 263.23724:824 266.24701:143 267.21716:10 268.2561:143 281.2496:41 298.2695:82 335.33194:1012 337.35294:52 349.35315:92 351.36563:102 352.35287:931 353.34149:654 364.35068:51 366.37344:133 367.33554:41 367.35718:61 376.35498:51 377.1821:43 378.37231:4372 379.36377:30 …	TRUE	FALSE	FALSE	FALSE	FALSE	FALSE	20454.2	18812.7	20100	19228.1	23147.3	18326.4	13366.9	18829.9	21703.8	21740.2	16114.6	19641.7	20577.7	17527	20238.2	17974.5	20340.6	20660.8	18952.8	21075.8	0.389184	0.219141	0.58207	0.98836	0.555136	0.371509
Ceramide	Cer-NS	d42:1	d18:1	24:0		Cer-NS d18:1/24:0	C42H83NO3	ZJVVOYPTFQEGPH-MHAUTQJVNA-N	CCCCCCCCCCCCCCCCCCCCCCCC(=O)NC(CO)C(O)\C=C\CCCCCCCCCCCCC	13.3101	708.647	[M+Hac-H]-	117748	95.04977:51 207.2149:31 209.18773:31 216.69243:31 216.99994:112 225.21786:82 235.20653:133 236.23552:43 237.22113:5302 239.23779:214 249.23299:41 250.24979:299 251.23062:51 253.25644:31 255.2318:61 262.25848:61 262.41846:35 263.2374:4449 265.25351:277 266.24716:727 267.25192:21 267.81274:42 268.26089:898 278.24557:71 280.26865:41 281.24744:133 291.26404:216 296.2919:41 298.27463:333 299.00372:71 …	TRUE	FALSE	FALSE	FALSE	FALSE	FALSE	118637	107382	117265	106585	117476	111081	84951	121784	122112	105668	107035	104913	136256	120806	132343	118779	113918	128765	143395	135812	0.568626	0.3536	0.040673	0.266317	0.0601404	0.373914
Ceramide	Cer-NS	d42:2	d18:1	24:1		Cer-NS d18:1/24:1	C42H81NO3	FUWLDBVRSLAFFJ-DBOQMASJNA-N	CCCCCCCCCCCCC\C=C\C(O)C(CO)NC(=O)CCCCCCCCC\C=C/CCCCCCCCCCCC	13.1157	706.63	[M+Hac-H]-	117149	92.32074:10 225.21086:31 235.20152:362 237.19873:47 237.22046:2489 239.23712:112 250.23793:51 250.25578:122 255.22884:31 259.17981:10 261.22141:204 262.42233:44 263.23895:1841 264.22885:52 266.24417:363 268.2648:371 281.24432:71 296.26685:31 298.26901:133 321.31409:31 346.23193:31 347.33026:2485 349.34482:333 363.35983:133 364.3584:2063 365.34482:1664 366.36496:340 367.35953:184 378.38022:61 388.…	FALSE	TRUE	FALSE	FALSE	FALSE	FALSE	129295	101817	125040	113661	115912	114439	83541.4	113742	124113	130512	110190	106423	125867	106079	122869	123625	115653	127331	117180	135696	0.690278	0.665572	0.293914	0.913802	0.263875	0.122035
Ceramide	Cer-NS	d43:1	d18:1	25:0		Cer-NS d18:1/25:0	C43H85NO3	QHPYSHVSWAOLHS-BSKJHSHCNA-N	CCCCCCCCCCCCCCCCCCCCCCCCC(=O)NC(CO)C(O)\C=C\CCCCCCCCCCCCC	13.42	722.662	[M+Hac-H]-	59062	221.2274:31 235.20668:61 237.22128:2883 239.24231:153 240.8885:31 250.25217:143 251.23972:82 255.23645:51 263.23755:2305 265.24905:61 266.24963:373 268.26569:490 278.25043:31 280.25699:31 281.24997:122 291.2666:31 296.3042:10 298.27481:235 335.3273:31 352.34818:41 352.36142:61 353.35004:61 361.35181:41 362.21866:31 362.36636:35 363.13766:24 363.36087:3519 364.35669:33 366.3768:41 378.37302:112 37…	TRUE	FALSE	FALSE	FALSE	FALSE	FALSE	54571.3	58032.8	57141.5	56478.2	61184.3	56394.4	54051.2	54445.1	57920.8	62882.2	57507.3	51601.7	65320.6	56022.1	59640	57546.2	60386.5	67555.6	65241.4	67317.7	0.863454	0.835367	0.0269214	0.75809	0.0348578	0.0997638
Ceramide	Cer-NS	d34:2	d18:2	16:0		Cer-NS d18:2/16:0	C34H65NO3	GMWIWVUTMCBDSP-ZNPGVSGMNA-N	CCCCCCCCCCCCCCCC(=O)NC(CO)C(O)\C=C\CC\C=C\CCCCCCCCC	9.13062	594.506	[M+Hac-H]-	26985	221.19124:10 235.20399:1294 236.48679:23 237.22076:1450 239.23523:42 248.2312:82 253.25604:235 254.2495:1018 255.23138:759 261.22168:972 264.23831:224 266.24445:224 268.26047:31 278.24747:61 279.2298:31 279.39014:61 280.26346:5408 294.23538:61 295.26007:52 296.26224:767 298.2717:31 459.45941:41 471.47446:10 484.93942:31 486.46002:601 498.48056:42 502.46729:545 504.47452:1085 516.48334:82 532.7713…	TRUE	FALSE	FALSE	FALSE	FALSE	FALSE	26472.7	27815.4	30824	36068.1	29267.6	26898.3	24253.8	23764.5	30354.1	34581.5	19051.8	22475.8	25373.8	29111.8	24169.6	24429.1	24953.4	30521.2	22892.8	26412.4	0.441947	0.0326004	0.0787141	0.171075	0.402045	0.415903
Ceramide	Cer-NS	d40:2	d18:2	22:0		Cer-NS d18:2/22:0	C40H77NO3	AWTNSRHUZXWBCO-MXBGQREFNA-N	CCCCCCCCCCCCCCCCCCCCCC(=O)NC(CO)C(O)\C=C\CC\C=C\CCCCCCCCC	12.5659	678.599	[M+Hac-H]-	7491	235.20441:360 237.22334:20 248.23607:25 261.22214:250 264.23187:56 266.24719:66 296.26273:25 321.31732:453 337.34543:46 338.33875:356 339.32568:224 364.35638:1419 378.32327:31 380.3569:219 382.36285:20 570.56006:199 586.5379:186 588.5661:277 600.56647:31 616.62683:20 618.50977:20 618.57648:2586 678.59924:15	TRUE	FALSE	FALSE	FALSE	FALSE	FALSE	8912.25	8218.31	8217.38	8771.5	9440.81	7675.12	6114.38	6301.12	7638.31	7834.12	5541.06	6028.19	8446.31	7497.31	7756.44	6236.88	7348.81	7997.75	6852.44	6994.31	0.0064548	0.0233314	0.0023268	0.93136	0.956467	0.959796
Ceramide	Cer-NS	d41:2	d18:2	23:0		Cer-NS d18:2/23:0	C41H79NO3	YVMFSKMDQVDKIS-QCVIXQMPNA-N	CCCCCCCCCCCCCCCCCCCCCCC(=O)NC(CO)C(O)\C=C\CC\C=C\CCCCCCCCC	12.9857	692.615	[M+Hac-H]-	9390	201.01456:20 235.20674:408 237.22134:41 248.24068:41 261.22684:287 264.22745:61 266.25195:71 296.2507:31 333.32513:21 335.32974:496 351.35284:41 351.37399:82 352.35327:420 353.34454:286 367.36032:32 374.17422:10 377.18527:22 378.37003:1642 392.39081:31 394.35535:204 584.58484:255 600.54907:155 600.55945:289 602.58051:371 614.59271:41 630.59741:31 632.58673:2933	TRUE	FALSE	FALSE	FALSE	FALSE	FALSE	10951.8	11525.4	11456.1	9414.94	12260.8	9016.44	7659.38	7464	10132.4	10190.5	7506.81	7748	9391	10960.1	8643.31	8932.81	8299.69	8828.62	8795.62	8613.62	0.0180351	0.0200565	0.005797	0.961373	0.753804	0.817483
Ceramide	Cer-NS	d42:3	d18:2	24:1		Cer-NS d18:2/24:1	C42H79NO3	KADBCXSPXAVXJL-QWGNBJIWNA-N	CCCCCCCCCCCC\C=C/CCCCCCCCCC(=O)NC(CO)C(O)\C=C\CC\C=C\CCCCCCCCC	12.5862	704.615	[M+Hac-H]-	14758	235.20441:494 237.21466:36 248.23384:25 261.21985:478 264.22958:87 266.25177:117 294.2673:5 296.26028:31 345.31958:20 347.33096:584 363.33633:25 363.36325:41 364.35638:472 365.33472:377 378.36719:15 388.3512:56 389.15521:22 390.36975:2360 404.35373:36 406.3707:339 408.38986:25 596.56897:306 608.57013:15 610.63251:5 612.57269:302 614.57886:471 625.48438:5 626.57178:36 642.53748:25 642.5661:25 644.…	FALSE	TRUE	FALSE	FALSE	FALSE	FALSE	17337.9	16482.7	17166.4	17404.8	18049.9	14862.8	11718.6	11942.8	15554.8	15601.4	12466.7	11574.8	17243.3	14242.8	14865.3	11373.6	13951	15260.7	13029.3	15038.8	0.015849	0.0292609	0.0015206	0.916464	0.85962	0.78243
Ceramide	Cer-NS	d42:4	d18:2	24:2		Cer-NS d18:2/24:2	C42H77NO3	QMPJMPWWIPZEKC-AREXDUQANA-N	CCCCCCCCC\C=C\CC\C=C\C(O)C(CO)NC(=O)CCCCCCCCCCCCCCCC\C=C/C\C=C/CC	11.3991	702.598	[M+Hac-H]-	1052	217.0025:15 235.207:61 261.22031:51 264.22546:10 266.25226:25 345.31754:36 362.34784:31 374.99673:20 388.34903:184 404.34866:31 594.54504:20 594.56573:25 610.53925:25 612.57001:61 642.57056:460	FALSE	FALSE	FALSE	FALSE	FALSE	TRUE	1152.5	1139.5	1138.69	1115.19	1026.88	1116.38	814.562	1102.88	1179.44	1047.88	902.938	886	1402.25	864.188	1108.19	811.375	896.5	1132.56	1023.44	1184.31	0.379264	0.474512	0.191699	0.874946	0.663042	0.856874
Ceramide	Cer-NS	d43:2	d18:2	25:0		Cer-NS d18:2/25:0	C43H83NO3	SHGDZPJYRJJAQG-INARCNGINA-N	CCCCCCCCCCCCCCCCCCCCCCCCC(=O)NC(CO)C(O)\C=C\CC\C=C\CCCCCCCCC	13.2329	720.645	[M+Hac-H]-	3062	235.21053:133 237.22733:31 261.21954:153 276.9429:10 363.35785:153 378.36172:31 379.39716:41 380.38721:143 381.37305:82 387.11212:10 392.37402:31 404.3822:71 405.1799:10 406.40497:490 422.39157:92 608.94348:10 612.591:92 628.5061:41 628.57684:61 628.59808:92 630.60199:133 630.61615:214 642.53845:20 660.53516:71 660.55695:71 660.62219:1695	TRUE	FALSE	FALSE	FALSE	FALSE	FALSE	2982.06	2397.06	2976.56	2280	3074.31	2981	2113.75	2800.38	3558.75	3176.69	2907.94	2988.12	3435.62	2973.38	3547.75	3460.06	3485.25	3159.25	3324.69	3611.31	0.545016	0.0792727	0.006708	0.397437	0.115057	0.160807
Ceramide	Cer-NS	d44:2	d18:2	26:0		Cer-NS d18:2/26:0	C44H85NO3	ZLOXRQZQPDQQBX-NBGJCBSLNA-N	CCCCCCCCCCCCCCCCCCCCCCCCCC(=O)NC(CO)C(O)\C=C\CC\C=C\CCCCCCCCC	13.3461	734.663	[M+Hac-H]-	1464	235.20012:41 261.21539:41 279.22806:20 375.40109:10 377.37204:71 390.36749:31 392.39404:41 394.39502:41 395.39322:31 418.39389:71 420.40796:153 436.40854:41 626.5943:20 626.61902:31 642.62122:41 642.65698:10 644.64014:71 656.61047:10 674.55261:31 674.61859:461	TRUE	FALSE	FALSE	FALSE	FALSE	FALSE	935.5	1156.56	1247.94	1253.5	1149.81	1570.62	824.562	1667.81	1786.12	1516.62	2279.69	1230.38	1447.5	1461.12	1793.62	1548.38	1257.44	1702.19	1644.19	1806.44	0.105904	0.0518952	0.003757	0.515302	0.555409	0.811172
Ceramide	Cer-NS	d44:1	d20:1	24:0		Cer-NS d20:1/24:0	C44H87NO3	FRWWCDHJRWYDOU-NHFVQZBWNA-N	CCCCCCCCCCCCCCCCCCCCCCCC(=O)NC(CO)C(O)\C=C\CCCCCCCCCCCCCCC	13.5325	736.677	[M+Hac-H]-	4302	237.21851:41 263.23691:71 265.24841:389 279.23212:51 281.23984:41 291.27313:194 294.28134:51 296.30109:61 326.3035:41 339.33563:10 349.31607:41 349.35034:329 364.35593:41 365.37204:41 366.37332:265 367.35437:194 377.37933:61 391.58572:22 392.36511:133 392.39029:997 394.40247:71 395.38943:41 408.38089:194 420.41849:214 436.42218:41 628.61108:102 644.58472:20 644.62415:205 644.64203:144 646.60315:7…	TRUE	FALSE	FALSE	FALSE	FALSE	FALSE	2830.06	4509.94	2703.81	3723.81	4221.81	3583.81	4172.75	3746.5	6683.31	5025.5	2939.19	3713.56	3117.69	3140.75	5479.81	6746.38	5573.75	3785.75	4599.06	5732.75	0.159737	0.895534	0.0265782	0.226907	0.421413	0.048093
Glycerolipid	DAG	32:0	16:0	16:0		DAG 16:0-16:0	C35H68O5	JEJLGIQLPYYGEE-UHFFFAOYNA-N	CCCCCCCCCCCCCCCC(=O)OCC(CO)OC(=O)CCCCCCCCCCCCCCC	11.8017	586.54	[M+NH4]+	3061	83.08555:20 95.0864:41 226.98755:10 239.26111:10 313.26822:194 533.8631:10 551.49585:112	TRUE	FALSE	FALSE	FALSE	FALSE	FALSE	3714.44	3830.38	3353.56	3680.44	4220.06	2995.56	3079.38	2683.38	3213.44	3440.69	2684.44	2784.25	4098.19	3042.06	2672.06	2377.81	2451.19	2519.62	2124.69	2245.75	0.0068443	0.0487498	1.8e-05	0.931527	0.0008884	0.0551604
Glycerolipid	DAG	34:0	16:0	18:0		DAG 16:0-18:0	C37H72O5	ONCLVQFEAFTXMN-UHFFFAOYNA-N	CCCCCCCCCCCCCCCCCC(=O)OC(CO)COC(=O)CCCCCCCCCCCCCCC	12.9997	614.571	[M+NH4]+	2908	71.09094:10 85.09986:41 89.06126:20 313.27631:214 336.43643:10 341.30359:235 415.24469:20 553.45068:41 553.46399:71 579.53448:298 614.53577:10	TRUE	FALSE	FALSE	FALSE	FALSE	FALSE	3566.62	4084.69	2806.88	3346.56	3041.62	2596.88	2775.81	2510.62	2793.81	3750.69	1991.06	2750.12	3803.5	3401.38	2185	2141.12	3093.44	2907.25	2308.31	2299.81	0.161617	0.222735	0.0224343	0.888993	0.283485	0.503582
Glycerolipid	DAG	34:1	16:0	18:1		DAG 16:0-18:1	C37H70O5	YEJYLHKQOBOSCP-ZCXUNETKNA-N	CCCCCCCCCCCCCCCC(=O)OCC(CO)OC(=O)CCCCCCC\C=C/CCCCCCCC	11.9955	612.554	[M+NH4]+	2534	76.99615:10 93.07192:20 226.98547:20 239.24373:10 269.00504:20 311.26389:10 313.2709:143 339.29123:143 562.88959:10 577.5177:102 577.55841:31	TRUE	TRUE	FALSE	FALSE	FALSE	FALSE	4252.31	3976.56	2778.75	3961.75	3167.06	2298.94	1999.69	2610.88	2281.75	2337.56	1529	1901	4080.88	2628.81	2231.25	1507.44	1920.31	2130.75	1521.5	1569.94	0.0020714	0.0580418	0.0002589	0.726382	0.0067087	0.169819
Glycerolipid	DAG	34:2	16:0	18:2		DAG 16:0-18:2	C37H68O5	SVXWJFFKLMLOHO-BCTRXSSUNA-N	CCCCCCCCCCCCCCCC(=O)OCC(CO)OC(=O)CCCCCCC\C=C/C\C=C/CCCCC	11.009	610.534	[M+NH4]+	4310	71.08408:16 79.05142:6 81.07125:24 83.08441:12 85.10273:8 91.05918:4 93.07082:8 95.08519:24 97.10444:6 105.07082:4 109.1003:16 119.08959:4 121.10268:10 123.11543:10 125.14319:2 133.09898:6 137.13164:6 147.11784:4 149.12859:6 157.16124:2 163.14958:4 173.14127:2 177.16136:4 181.15923:4 184.97711:4 195.17073:4 203.17683:4 207.18031:4 221.09395:4 221.22404:4 226.99004:4 239.09348:4 239.23094:8 243.21…	TRUE	FALSE	FALSE	FALSE	FALSE	TRUE	5442.44	5028.5	5383.56	4573.12	5453.31	2776.75	2365	3583.81	4377.44	3468.69	4232.44	3529.5	6749.75	4260.44	3897.19	2911.5	5020	4616.81	4481.81	4047.75	0.0013335	0.332112	0.0426689	0.105046	0.109879	0.649586
Glycerolipid	DAG	36:4	16:0	20:4		DAG 16:0-20:4	C39H68O5	GYMMHHODMBOFGD-JAXHXWBXNA-N	CCCCCCCCCCCCCCCC(=O)OCC(CO)OC(=O)CCCCCC\C=C/C\C=C/C\C=C/C\C=C/CC	10.9019	634.542	[M+NH4]+	1695	77.03596:10 93.0681:10 111.0766:10 171.11472:20 177.173:20 185.12914:20 199.15315:10 203.16928:31 217.16394:10 220.96239:20 259.23175:20 269.23068:31 287.25101:31 313.27975:153 361.27576:31 599.48993:20	TRUE	FALSE	TRUE	FALSE	FALSE	TRUE	1904.69	2129	1865.44	1510.69	1765	3405.44	2370.38	3378.5	3585.94	4396.44	558.25	673.875	1035.06	792.125	654.375	871.25	881.125	711.375	842.5	569.625	0.0059698	3.02e-05	1.76e-05	0.0007606	0.0009599	0.757326
Glycerolipid	DAG	38:5	16:0	22:5		DAG 16:0-22:5	C41H70O5	VLJIZFHHJAQUNJ-SFVLIGPRNA-N	CCCCCCCCCCCCCCCC(=O)OCC(CO)OC(=O)CCCCC\C=C/C\C=C/C\C=C/C\C=C/C\C=C/CC	11.06	660.554	[M+NH4]+	1188	79.05758:5 81.07114:15 83.07915:5 91.05502:5 104.05934:5 135.11501:10 147.11768:5 159.11627:10 173.12439:10 199.15247:10 203.18065:10 213.17719:5 227.18329:5 256.05569:5 265.17746:10 292.96432:5 302.93924:5 313.26843:56 339.28864:20 385.27234:5 387.29108:25 621.88367:5 625.54816:25 643.55621:10	TRUE	FALSE	FALSE	FALSE	FALSE	TRUE	1062.25	1035.44	1040.69	1192	1275.75	1294.12	894.5	1164.62	1252.94	1221.31	1567.19	2005.81	2680.38	1915.69	1679.12	440.375	570.375	612.438	338.5	524.375	0.61947	0.0103835	1.71e-05	0.0046362	5.46e-05	0.0011378
Glycerolipid	DAG	38:6	16:0	22:6		DAG 16:0-22:6	C41H68O5	BXVYQJJBMVVALQ-LGFBOSHVNA-N	CCCCCCCCCCCCCCCC(=O)OCC(CO)OC(=O)CC\C=C/C\C=C/C\C=C/C\C=C/C\C=C/C\C=C/CC	10.7002	658.541	[M+NH4]+	4151	71.09109:10 79.05506:41 85.09871:20 93.0748:10 99.12372:10 111.11807:10 129.0623:20 131.08495:31 143.08321:20 157.10281:20 167.08177:20 171.11804:20 173.13567:10 181.09274:20 185.13255:20 189.13348:10 199.14868:31 205.56493:10 213.15474:20 215.18027:10 225.16566:20 227.17291:20 239.24408:20 251.16911:20 255.16275:10 269.24152:20 283.20422:10 296.95068:10 311.23196:31 313.27634:343 372.95798:11 38…	TRUE	FALSE	FALSE	FALSE	TRUE	TRUE	2819.69	2998.81	3556.31	3343.12	2702.5	1793.38	1751.94	1968.25	2537.06	3054.88	2773.94	3348.44	5551.56	4606.75	3663.19	6234.12	8713.75	9409.56	6543.44	5653.38	0.0199865	0.117759	0.003796	0.0124893	0.0001812	0.005613
Glycerolipid	DAG	36:1	18:0	18:1		DAG 18:0-18:1	C39H74O5	SAEPUUXWQQNLGN-ZZEZOPTANA-N	CCCCCCCCCCCCCCCCCC(=O)OCC(CO)OC(=O)CCCCCCC\C=C/CCCCCCCC	13.0415	640.586	[M+NH4]+	2452	79.05226:20 81.07593:10 95.08489:20 107.08172:10 220.98793:10 264.26556:20 269.03693:10 313.27078:71 338.22925:10 339.29395:214 341.30844:235 367.32541:41 418.32401:10 599.43091:10 604.26288:21 605.55377:300	TRUE	TRUE	FALSE	FALSE	FALSE	FALSE	3310.56	3606.44	1911.5	3341.56	3548.12	2198.12	1631.81	1620.88	2822.44	2211.38	1481.38	2143.88	4000.06	1946.12	1701.5	2010.62	2555.5	2624.44	2284.81	2086	0.0261353	0.143813	0.0386042	0.76174	0.421497	0.90687
Glycerolipid	DAG	36:2	18:0	18:2		DAG 18:0-18:2	C39H72O5	AJMZUFBKADIAKC-MLWYYCKJNA-N	CCCCCCCCCCCCCCCCCC(=O)OCC(CO)OC(=O)CCCCCCC\C=C/C\C=C/CCCCC	12.518	638.571	[M+NH4]+	1752	81.06828:15 85.09841:10 105.07191:5 109.1088:5 175.15204:5 245.23027:10 263.23572:10 328.97409:5 337.26578:56 340.23907:5 341.30432:97 603.54535:51	TRUE	FALSE	FALSE	FALSE	FALSE	TRUE	1759.56	1903.81	1372.19	1843	1996.25	924.312	1054	927.188	1274.81	934.875	1627.62	1609.31	2411.62	1461.44	1793	2606.81	2358.31	2505.06	2460.38	2224.5	0.0003576	0.978005	0.0008183	0.002909	4e-07	0.0065773
Glycerolipid	DAG	38:3	18:0	20:3		DAG 18:0-20:3	C41H74O5	HNIUPWXDMUKNJU-JTBMWNAQNA-N	CCCCCCCCCCCCCCCCCC(=O)OCC(CO)OC(=O)CCCCCCCCC\C=C/C\C=C/C\C=C/CC	12.8852	664.588	[M+NH4]+	1912	81.07465:31 93.06911:20 95.08485:41 161.12675:20 187.14626:20 261.25974:10 264.27179:31 268.98999:41 269.03165:10 271.24625:71 285.28647:10 289.25607:51 327.08115:31 341.30753:288 363.29019:143 383.14508:31 384.15656:31 439.20401:31 440.20694:51 495.25085:82 496.2561:71 552.3255:51 552.35205:31 603.10303:10 608.39514:71 629.54675:112 664.42621:20 664.45892:51	TRUE	FALSE	FALSE	FALSE	FALSE	TRUE	2566.5	4097.88	3010.38	2513.56	1955.19	699.938	470.562	392.188	547.875	784.688	2148.38	1829.5	2434	2375.06	1552.06	1973.94	2579.69	2363.94	1771.88	2168.56	0.0027415	0.0907533	0.126959	3.72e-05	8.5e-06	0.648345
Glycerolipid	DAG	38:4	18:0	20:4		DAG 18:0-20:4	C41H72O5	BRKLTVAHEPCGNK-ZKVKLVECNA-N	CCCCCCCCCCCCCCCCCC(=O)OCC(CO)OC(=O)CCCCCC\C=C/C\C=C/C\C=C/C\C=C/CC	12.3747	662.571	[M+NH4]+	5844	79.06081:10 85.09947:31 89.06353:10 91.05449:71 95.08591:41 119.08588:31 131.09412:10 143.08099:10 161.1351:31 169.10072:10 185.12631:20 187.15132:20 198.13608:10 199.17212:10 201.16226:31 203.17638:92 259.25342:31 269.2319:82 285.28052:31 287.23557:61 340.24081:21 341.30865:441 357.01785:10 361.25845:51 627.51703:51 645.56757:31	TRUE	FALSE	TRUE	FALSE	FALSE	TRUE	7343.5	7379.62	6755.69	7666.38	7164.38	7197.69	8568.31	7117.38	8287.38	10319.1	2948.31	2805.38	4633.69	4413.88	3169.5	3909.25	4667	3763.19	4272.19	4497.88	0.151128	2.07e-05	9e-07	0.0001462	0.0014155	0.17494
Glycerolipid	DAG	40:4	18:0	22:4		DAG 18:0-22:4	C43H76O5	IOAXEIUSQSTPJN-PYQGTGCGNA-N	CCCCCCCCCCCCCCCCCC(=O)OCC(CO)OC(=O)CCCCCCCC\C=C/C\C=C/C\C=C/C\C=C/CC	13.0358	690.605	[M+NH4]+	506	79.05867:10 105.06912:20 131.08804:10 165.17043:10 203.1888:10 217.20905:10 251.96347:10 297.2644:20 315.26981:20 341.29843:51 389.30182:51 645.54218:61 645.5816:20 655.54614:31 655.60034:20 690.62073:20	TRUE	FALSE	FALSE	FALSE	FALSE	TRUE	534.375	524.688	656.062	537.75	304.562	923.688	1097.19	872.812	1232.94	1060.88	66.625	236.438	498.688	185.562	196.938	96.8125	473.625	141.188	336	151	0.0002815	0.0168983	0.0177834	3.22e-05	3.32e-05	0.977973
Glycerolipid	DAG	40:6	18:0	22:6		DAG 18:0-22:6	C43H72O5	LBDXVTOFXXDOGH-HSBBONCLNA-N	CCCCCCCCCCCCCCCCCC(=O)OCC(CO)OC(=O)CC\C=C/C\C=C/C\C=C/C\C=C/C\C=C/C\C=C/CC	12.0884	686.574	[M+NH4]+	1733	81.06744:20 83.08055:10 93.06808:20 105.07079:10 109.09731:20 117.07347:10 157.10275:10 173.13556:20 183.11075:20 199.14651:20 203.14244:10 225.16963:10 237.16856:31 283.23462:10 291.21121:10 293.22025:41 311.23639:41 313.28079:10 335.94171:10 341.30295:236 385.27213:71 577.51697:31 620.74359:10 651.53308:31 669.5545:10 686.42377:41	TRUE	FALSE	FALSE	FALSE	TRUE	TRUE	1097.5	1243.25	1063	1184.81	1136.44	1156.94	1252.56	932.938	990.875	1597.94	1323.06	1320.62	1816.81	2444.56	1257.5	2898.5	3309	2586.94	2852.81	3197.69	0.750086	0.0975471	7.76e-05	0.118664	7.3e-06	0.0009002
Glycerolipid	DAG	36:3	18:1	18:2		DAG 18:1-18:2	C39H70O5	BLZVZPYMHLXLHG-RQOIEFAZNA-N	CCCCCCCC\C=C/CCCCCCCC(=O)OCC(CO)OC(=O)CCCCCCC\C=C/C\C=C/CCCCC	11.1648	636.552	[M+NH4]+	1549	79.05096:10 83.08266:31 93.07443:10 95.08609:41 95.09297:10 109.0998:20 195.16824:10 245.24048:10 263.24622:31 337.27478:133 339.29367:122 592.83832:10 601.513:82 619.53931:20	FALSE	TRUE	FALSE	FALSE	FALSE	TRUE	2623.19	2511.38	2107.38	2023	2555.75	1098.38	1092.12	1188.38	1593.56	970.625	758.062	1304.81	2584.62	1288.5	1162.12	1090.69	1452.38	1303.12	1229.44	1033.69	9.47e-05	0.021538	4.87e-05	0.498191	0.805526	0.562594
Ether linked phospholipid	EtherPC	36:6e	14:0e	22:6		PC 14:0e/22:6	C44H78NO7P	YWKMWEOXAHPOFW-UTPQGYPWNA-N	CCCCCCCCCCCCCCOCC(COP([O-])(=O)OCC[N+](C)(C)C)OC(=O)CC\C=C/C\C=C/C\C=C/C\C=C/C\C=C/C\C=C/CC	8.92907	822.561	[M+Hac-H]-	3544	224.07791:10 229.19067:61 283.24088:373 284.27005:10 310.64294:10 325.2139:21 327.20679:137 327.23486:758 341.19177:20 341.22824:10 349.20569:51 420.27997:102 433.26248:10 438.29333:312 480.29044:41 703.44556:10 748.52551:1368 763.47723:31 822.5274:102 822.56787:133	FALSE	FALSE	FALSE	FALSE	TRUE	TRUE	4008.75	3611.25	3476.94	4436.94	3630.19	4281.38	3136.06	3324.62	4018.81	4025.44	2710.75	2558	3201.5	3323.31	2786.19	3802	3590.06	3921.81	3747.12	3289.81	0.796191	0.0039129	0.452985	0.0135074	0.734059	0.0033732
Ether linked phospholipid	EtherPC	32:0e	16:0e	16:0		PC 16:0e/16:0	C40H82NO7P	WOTHHEHCEYHCFE-UHFFFAOYNA-N	CCCCCCCCCCCCCCCCOCC(COP([O-])(=O)OCC[N+](C)(C)C)OC(=O)CCCCCCCCCCCCCCC	10.3992	778.595	[M+Hac-H]-	3139	197.61952:10 237.21193:21 255.23122:760 284.2695:41 329.23834:31 448.31277:41 448.32471:31 466.31967:92 704.5484:625 778.55139:51 778.59082:71	TRUE	FALSE	FALSE	FALSE	FALSE	FALSE	4443.44	4954.94	3828.12	4603.62	5078.44	3760.06	3091.5	2042.38	3534.38	3604.5	2549.38	2556.25	3188	2955.25	1932.88	2152.81	2513.5	2200.81	1940.12	1843.06	0.0069574	0.0002252	9.7e-06	0.169724	0.0119286	0.0712046
Ether linked phospholipid	EtherPC	34:2e	16:0e	18:2		PC 16:0e/18:2	C42H82NO7P	IQACMFWAGALEAQ-DYMXKLMANA-N	CCCCCCCCCCCCCCCCOCC(COP([O-])(=O)OCC[N+](C)(C)C)OC(=O)CCCCCCC\C=C/C\C=C/CCCCC	9.82643	802.588	[M+Hac-H]-	1369	255.23126:82 278.34622:21 279.23441:753 283.2428:31 448.31619:41 466.31711:71 726.2948:10 728.5553:563 802.57782:51 802.59381:112	FALSE	FALSE	FALSE	FALSE	FALSE	TRUE	2011.44	1786	2116.06	1820.25	1937.19	892.25	982.375	988.125	896.812	999	1508.44	1092.62	1181.25	1246	1204.19	1372.12	1348.69	1256.5	1306.56	1435.25	4e-07	7.56e-05	2.39e-05	0.0040278	7e-06	0.238087
Ether linked phospholipid	EtherPC	36:4e	16:0e	20:4		PC 16:0e/20:4	C44H82NO7P	SOUZQPFUXRVDGK-SHJNOZFHNA-N	CCCCCCCCCCCCCCCCOCC(COP([O-])(=O)OCC[N+](C)(C)C)OC(=O)CCCCCC\C=C/C\C=C/C\C=C/C\C=C/CC	9.79231	826.591	[M+Hac-H]-	2922	205.19331:31 243.06615:10 255.22775:41 256.2341:31 259.23325:112 279.23071:51 303.22766:1524 376.05478:10 377.24326:61 448.31729:112 466.32428:340 719.5354:51 722.50195:10 752.55389:1172 756.49945:10 767.49475:32 811.57782:31 826.57544:102	FALSE	FALSE	TRUE	FALSE	FALSE	TRUE	3781.25	3792.31	2896.25	3798.69	3465.56	6588.38	6118.38	5917.81	7523	6384.81	977.562	877.875	926.812	1147.81	822.062	429.75	898	644.125	754.125	700.562	1.85e-05	4.17e-05	4e-07	2.21e-05	1.15e-05	0.023173
Ether linked phospholipid	EtherPC	36:5e	16:0e	20:5		PC 16:0e/20:5	C44H80NO7P	YHSSHPWVFALMBA-CYDMDVBXNA-N	CCCCCCCCCCCCCCCCOCC(COP([O-])(=O)OCC[N+](C)(C)C)OC(=O)CCC\C=C/C\C=C/C\C=C/C\C=C/C\C=C/CC	9.30125	824.576	[M+Hac-H]-	556	176.93355:10 231.9989:10 255.23309:10 257.22742:61 279.22916:31 301.2146:267 356.30914:10 377.24664:20 434.46863:10 448.30884:31 464.29163:10 466.32477:92 698.53729:10 742.53119:31 742.5658:21 750.49591:62 750.53455:392 762.59668:10 824.56018:41	FALSE	FALSE	FALSE	TRUE	FALSE	TRUE	190.75	167.25	250.438	238.312	329.75	225.812	139.375	140.062	168.062	244.812	1299.19	1147.5	1268.75	1333.62	1286.88	390.625	688.125	540.438	546.438	515.625	0.185065	0	0.0005962	0	0.0001438	1.3e-06
Ether linked phospholipid	EtherPC	38:4e	16:0e	22:4		PC 16:0e/22:4	C46H86NO7P	QAQLMTPGVRHDLS-SHJNOZFHNA-N	CCCCCCCCCCCCCCCCOCC(COP([O-])(=O)OCC[N+](C)(C)C)OC(=O)CCCCCCCC\C=C/C\C=C/C\C=C/C\C=C/CC	10.5089	854.624	[M+Hac-H]-	375	287.27368:20 331.26013:449 444.95645:10 448.29022:20 466.29971:41 466.3241:61 709.4798:10 776.52673:10 780.58978:506 854.59607:41	FALSE	FALSE	FALSE	FALSE	FALSE	TRUE	345.688	360.5	407	320.312	539.25	1056.88	1086.25	1001.44	968.312	1110.56	32	20.3125	26.1875	45.375	38	48.75	20	18.1875	21.875	28	7e-07	0.0006683	0.0005963	1.7e-06	1.2e-06	0.500792
Ether linked phospholipid	EtherPC	38:5e	16:0e	22:5		PC 16:0e/22:5	C46H84NO7P	VGMPOLIXNOOTMT-JTBZDUPANA-N	CCCCCCCCCCCCCCCCOCC(COP([O-])(=O)OCC[N+](C)(C)C)OC(=O)CCCCC\C=C/C\C=C/C\C=C/C\C=C/C\C=C/CC	9.90118	852.606	[M+Hac-H]-	3000	255.21858:20 255.23436:82 259.25125:31 281.24771:92 285.26334:92 303.23486:184 305.43298:21 329.22659:116 329.24707:402 333.71701:10 448.32602:51 464.28482:10 466.32407:61 492.33548:41 624.12329:10 776.57434:21 778.56128:733 852.60132:92	FALSE	FALSE	FALSE	FALSE	FALSE	TRUE	3235.44	3568.69	2850.5	3219.62	3264.56	2476.88	1877.38	1977.44	2532.94	2291.75	5147.81	5281.56	6060.94	7660.12	4296.5	1047.81	895	805.875	816.938	683.5	0.0004385	0.0110466	1e-07	0.0028911	1.18e-05	0.0009551
Ether linked phospholipid	EtherPC	38:6e	16:0e	22:6		PC 16:0e/22:6	C46H82NO7P	QQQQNYAHSSIZBU-XTQGPSINNA-N	CCCCCCCCCCCCCCCCOCC(COP([O-])(=O)OCC[N+](C)(C)C)OC(=O)CC\C=C/C\C=C/C\C=C/C\C=C/C\C=C/C\C=C/CC	9.65602	850.592	[M+Hac-H]-	67521	75.32218:10 78.95666:82 93.07378:31 107.08169:20 107.08607:92 109.10314:41 117.07245:41 121.10031:51 131.09294:20 133.10059:51 133.44427:10 137.13023:41 143.08392:41 147.11536:31 149.13312:61 151.14555:31 163.07961:31 163.14629:51 168.04494:112 173.13857:10 177.16264:194 189.16087:41 191.17863:122 194.12802:31 203.17801:82 208.07025:51 229.19423:647 241.18323:31 246.16092:10 249.18307:245 255.212…	FALSE	FALSE	FALSE	FALSE	TRUE	TRUE	76768.7	72152.1	76190.8	73801.8	78226.1	66087	55808.8	50055.4	65256.2	61719.2	63109.1	55964.9	67262.1	76802.1	57557.4	78170.1	71267.5	69057.6	70268.1	64899.7	0.0012606	0.037034	0.0873039	0.393016	0.0185906	0.165809
Ether linked phospholipid	EtherPC	36:5e	16:1e	20:4		PC 16:1e/20:4	C44H80NO7P	VXQMCPDKMGAOGH-LNJNMWSONA-N	CCCCCC\C=C/CCCCCCCCOCC(COP([O-])(=O)OCC[N+](C)(C)C)OC(=O)CCCCCC\C=C/C\C=C/C\C=C/C\C=C/CC	9.6708	824.575	[M+Hac-H]-	1968	73.82848:10 205.18687:51 224.06963:51 239.23569:41 259.24417:103 288.00784:10 303.23215:1670 342.68167:10 375.21475:41 446.28748:61 446.30536:102 464.29361:249 464.31186:303 750.46442:52 750.534:1343 765.48615:32 824.54358:71 824.58813:153	FALSE	FALSE	TRUE	FALSE	FALSE	TRUE	2583.94	2012.81	2043.19	2672.12	2415.06	3905.38	3184.19	4508.75	3544.31	3361.31	1179.44	878.5	956	1163.75	1068.94	542.375	750.812	791.688	1164.94	624.625	0.0010575	2.28e-05	1.75e-05	0.000206	3.3e-06	0.0546945
Ether linked phospholipid	EtherPC	36:6e	16:1e	20:5		PC 16:1e/20:5	C44H78NO7P	YHOIJVHLDXTLSX-VCFWMXEANA-N	CCCCCC\C=C/CCCCCCCCOCC(COP([O-])(=O)OCC[N+](C)(C)C)OC(=O)CCC\C=C/C\C=C/C\C=C/C\C=C/C\C=C/CC	9.21787	822.569	[M+Hac-H]-	448	224.06917:20 257.22113:51 299.21048:10 301.19562:52 301.21274:385 327.23172:51 446.29251:31 464.30783:82 748.52368:378 822.578:61	FALSE	FALSE	FALSE	TRUE	FALSE	TRUE	72.375	224.25	89.0625	166.125	127	125.312	130.188	128.625	152.75	88.75	1238.5	1021.44	1150	1105.69	1076.56	313.75	546.812	249.25	454.688	490.25	0.725833	0	0.002206	3.3e-06	0.0061182	5.5e-06
Ether linked phospholipid	EtherPC	38:7e	16:1e	22:6		PC 16:1e/22:6	C46H80NO7P	LSUUYCOJTDXYNX-AQISBKEKNA-N	CCCCCC\C=C/CCCCCCCCOCC(COP([O-])(=O)OCC[N+](C)(C)C)OC(=O)CC\C=C/C\C=C/C\C=C/C\C=C/C\C=C/C\C=C/CC	9.0281	848.577	[M+Hac-H]-	1628	229.19576:51 283.24429:214 304.92593:21 324.03549:21 327.21307:63 327.23093:572 333.03256:10 445.02023:10 446.2981:71 464.3136:214 773.59955:22 774.53778:1024 789.49603:31 848.56757:102	FALSE	FALSE	FALSE	FALSE	TRUE	TRUE	2408.38	2323.38	2568.44	2992	2514.06	1952.38	1295.19	1287.75	1430.5	1241.5	1217.19	1069.81	1339.5	1588.94	1130.56	1266.62	1292.81	1090.12	1332.69	1210.12	0.0002111	2.29e-05	5e-06	0.314364	0.203865	0.768878
Ether linked phospholipid	EtherPC	36:2e	18:0e	18:2		PC 18:0e/18:2	C44H86NO7P	LMGTVCKIUNTOEP-IUFKAHDJNA-N	CCCCCCCCCCCCCCCCCCOCC(COP([O-])(=O)OCC[N+](C)(C)C)OC(=O)CCCCCCC\C=C/C\C=C/CCCCC	10.8104	830.631	[M+Hac-H]-	1082	89.02507:20 98.06198:5 113.02503:15 119.03406:41 143.03748:10 173.98691:5 179.05769:20 279.22467:61 280.26541:31 306.22858:5 307.26401:15 327.27441:15 352.31976:15 494.3533:15 590.50409:20 590.54523:92 608.53412:41 608.56195:76 610.53015:10 756.58533:92 770.60205:484 830.60443:15	FALSE	FALSE	FALSE	FALSE	FALSE	TRUE	1227.19	1034.06	942.625	1072.44	1076.44	1008.94	904.062	1134.31	1189.88	952.25	886.75	840	1200.12	949.062	1356.19	1064.19	1100.31	1052.81	1429.25	1211.31	0.657624	0.831012	0.263235	0.94166	0.169968	0.333592
Ether linked phospholipid	EtherPC	40:6e	18:0e	22:6		PC 18:0e/22:6	C48H86NO7P	QBZALASVZLFAHF-RRHSVIFUNA-N	CCCCCCCCCCCCCCCCCCOCC(COP([O-])(=O)OCC[N+](C)(C)C)OC(=O)CC\C=C/C\C=C/C\C=C/C\C=C/C\C=C/C\C=C/CC	10.6331	878.622	[M+Hac-H]-	2638	175.15157:10 229.19681:41 283.24054:224 327.23444:514 405.27582:41 476.34607:61 494.36224:235 804.58527:1109 819.54266:20 842.66711:10 878.62396:112	FALSE	FALSE	FALSE	FALSE	TRUE	TRUE	3187.62	2764.88	2938.19	2798.25	3347.31	2517.81	2211.12	2054.62	2686	2410.69	2291.56	2071.5	2944.81	2766.75	2203.12	3346.69	2690.31	2450.5	2447.44	2622.81	0.0040666	0.0267128	0.178735	0.705227	0.131445	0.311668
Ether linked phospholipid	EtherPC	34:1e	18:1e	16:0		PC 18:1e/16:0	C42H84NO7P	IQLHTKSHLGLPMG-MRCUWXFGNA-N	CCCCCCCCCCCCCCCC(=O)OC(COCCCCCCCC\C=C/CCCCCCCC)COP([O-])(=O)OCC[N+](C)(C)C	10.4952	804.611	[M+Hac-H]-	5263	152.98869:10 255.23416:1554 281.24753:224 283.25296:20 466.32077:31 474.33487:112 490.78046:10 492.33835:173 730.57184:1424 804.57007:41 804.59808:92	TRUE	FALSE	FALSE	FALSE	FALSE	FALSE	8938.06	8779.56	7069.19	9854.12	9706.62	5636.56	5253.06	3235.19	5559.62	6027.56	3951.81	3370.06	4525.44	4943.31	3506.94	3031.38	3158.5	2985.38	2884.38	2851.56	0.0007016	3.34e-05	0.000258	0.0970395	0.0114343	0.0215313
Ether linked phospholipid	EtherPC	40:7e	18:1e	22:6		PC 18:1e/22:6	C48H84NO7P	MWJZGUPJPKCTCF-BGOAOESGNA-N	CCCCCCCC\C=C/CCCCCCCCOCC(COP([O-])(=O)OCC[N+](C)(C)C)OC(=O)CC\C=C/C\C=C/C\C=C/C\C=C/C\C=C/C\C=C/CC	9.72869	876.612	[M+Hac-H]-	4325	78.95764:10 121.10332:10 133.10379:10 141.01381:51 175.17021:5 191.17696:20 226.26697:5 229.19899:51 249.17477:15 255.23149:20 283.24307:266 301.21307:10 305.15875:11 327.22958:819 391.23425:15 403.25909:31 474.33167:92 492.3132:20 492.33511:278 647.46136:15 673.48163:25 720.53088:25 729.45129:25 800.0304:15 802.50269:61 802.57465:1344 803.55432:10 811.27222:5 817.53363:31 876.54803:20 876.59399:…	FALSE	FALSE	FALSE	FALSE	TRUE	TRUE	6527.75	5153.25	3637.62	7133.56	7641.5	4641.19	3609	3846.12	4301.06	4357.31	3262.56	3157.5	4006.75	4727.88	3322.12	3340.25	3098.94	3409.94	3887.19	3447.19	0.0602707	0.0181825	0.0225612	0.231083	0.0133167	0.448407
Ether linked phospholipid	EtherPC	40:8e	18:2e	22:6		PC 18:2e/22:6	C48H82NO7P	QVPPJOXTFVMHNE-ATKGLLPENA-N	CCCCC\C=C/C\C=C/CCCCCCCCOCC(COP([O-])(=O)OCC[N+](C)(C)C)OC(=O)CC\C=C/C\C=C/C\C=C/C\C=C/C\C=C/C\C=C/CC	9.78322	874.579	[M+Hac-H]-	2720	149.13725:31 221.27377:10 229.1868:41 283.24127:173 303.23242:31 327.23013:396 472.28455:20 472.31213:71 490.33691:153 800.54907:738 815.52954:20 874.53943:31 874.58533:92 874.63538:31	FALSE	FALSE	FALSE	FALSE	TRUE	TRUE	2676.38	2246.19	1895.56	3117.44	2467.38	2508.12	2869.88	2986.75	3245.94	3372.81	2741.75	2491.56	2549.62	2960	2830.06	1983.94	2891.25	2711.75	3018.69	2831.5	0.0775094	0.324199	0.472992	0.144829	0.228682	0.896476
Ether linked phospholipid	EtherPC	40:8e	18:2e	22:6		PC 18:2e/22:6	C48H82NO7P	QVPPJOXTFVMHNE-ATKGLLPENA-N	CCCCC\C=C/C\C=C/CCCCCCCCOCC(COP([O-])(=O)OCC[N+](C)(C)C)OC(=O)CC\C=C/C\C=C/C\C=C/C\C=C/C\C=C/C\C=C/CC	9.17522	874.588	[M+Hac-H]-	1309	177.16756:10 189.16797:5 229.18309:10 241.20256:5 255.23053:46 283.2421:189 327.23117:446 401.24326:20 470.3259:5 472.31088:31 490.29819:25 490.32318:138 798.41827:11 800.55273:737 874.53101:20 874.59778:76	FALSE	FALSE	FALSE	FALSE	TRUE	TRUE	2108.5	1822.31	1575.25	1618.44	1840.88	1193.94	1237.5	1006.31	1453.69	1117.94	1307.69	1090	1236.62	1475.88	911.125	1102.12	1100.62	1067.94	921.688	993	0.001187	0.0024188	7.15e-05	0.984785	0.079337	0.140572
Ether linked phospholipid	EtherPC	40:9e	18:3e	22:6		PC 18:3e/22:6	C48H80NO7P	IDYBPHOYZBRAFH-YVHSNDMLNA-N	CC\C=C/C\C=C/C\C=C/CCCCCCCCOCC(COP([O-])(=O)OCC[N+](C)(C)C)OC(=O)CC\C=C/C\C=C/C\C=C/C\C=C/C\C=C/C\C=C/CC	9.11364	872.572	[M+Hac-H]-	1177	141.01677:41 224.06888:20 229.1965:31 253.23111:10 279.22256:10 283.24515:71 286.08762:10 326.18622:20 327.22165:61 327.23187:163 337.20502:10 470.30835:20 488.31711:71 796.54254:21 798.51501:155 798.54291:247 810.53741:10 812.5271:41 860.59296:10 872.55115:31 872.58447:61	FALSE	FALSE	FALSE	FALSE	TRUE	TRUE	1549.38	1254.62	1483.5	1304.19	1456.38	1117.44	876.75	1197	1138.88	1111.56	1119.94	1093.5	1042.12	1127.06	1176.56	1124.25	1042.62	998.375	1286.5	1048.69	0.0034392	0.0011028	0.0034336	0.701842	0.87907	0.837237
Ether linked phospholipid	EtherPE	34:5e	14:1e	20:4		PE 14:1e/20:4	C39H70NO7P	FQLLNPWONVRAHU-VMADMRDTNA-N	CCCC\C=C/CCCCCCCCOCC(COP(O)(=O)OCCN)OC(=O)CCCCCC\C=C/C\C=C/C\C=C/C\C=C/CC	9.11153	694.467	[M-H]-	1041	100.93121:14 158.97318:27 160.40674:3 191.10167:3 196.03482:10 203.12083:3 205.18932:10 255.2346:3 259.24243:14 259.26514:3 301.23111:3 303.23276:146 367.38528:3 390.23114:14 406.34875:3 408.25381:34 634.5769:3 694.43073:14 694.47162:51	FALSE	FALSE	TRUE	FALSE	FALSE	TRUE	1308.88	1084.75	1119.25	1514.25	1300.19	1135.81	1182.06	1150.19	1133.69	1409.56	803	843.438	743.625	953.875	790.875	902.562	991.375	852.188	730.062	876.5	0.517425	0.0008596	0.0020298	0.0003542	0.001165	0.452607
Ether linked phospholipid	EtherPE	38:4e	16:0e	22:4		PE 16:0e/22:4	C43H80NO7P	NXDMYSFXEOZPQK-PYQGTGCGNA-N	CCCCCCCCCCCCCCCCOCC(COP(O)(=O)OCCN)OC(=O)CCCCCCCC\C=C/C\C=C/C\C=C/C\C=C/CC	10.9168	752.555	[M-H]-	2366	303.21506:20 303.23471:71 304.23801:71 305.24051:41 313.24991:10 330.3924:21 331.25983:376 420.27167:31 438.29077:82 752.53479:229	FALSE	FALSE	FALSE	FALSE	FALSE	TRUE	2471.81	1961.38	1996.44	3564.25	3310.31	3772.56	2938.06	3974.06	5163.88	4291.31	1218.31	1079.94	1538.69	1294.69	1552.44	1245.62	1369.44	1378.5	1647.56	1552.38	0.0237462	0.0140964	0.0195987	0.0012171	0.0016268	0.407171
Ether linked phospholipid	EtherPE	34:2e	16:1e	18:1		PE 16:1e/18:1	C39H76NO7P	RFPQMVKZNQOUGY-KXYOHKLBNA-N	CCCCCCCC\C=C/CCCCCCCC(=O)OC(COCCCCCCCC\C=C/CCCCCC)COP(O)(=O)OCCN	10.6535	700.521	[M-H]-	10052	140.00845:51 179.03627:10 196.03188:71 218.05249:10 239.2395:41 253.21555:71 254.4227:52 255.23131:871 281.2493:2679 416.97125:10 418.26883:102 436.28079:214 444.28635:61 462.29495:92 624.9798:10 700.51843:801	FALSE	TRUE	FALSE	FALSE	FALSE	FALSE	10272.8	9632.06	10679.4	11818.9	9960.5	6508.94	5064.31	6619.44	8086.75	6900.5	8411.5	7623.94	11789.2	9511.69	9845.44	11245.8	13686.4	15297.9	13682.2	14408.2	0.0002444	0.233085	0.0032938	0.0114277	2.86e-05	0.0025313
Ether linked phospholipid	EtherPE	34:3e	16:1e	18:2		PE 16:1e/18:2	C39H74NO7P	RIQAKBUOHSSMTC-PNBIJBBKNA-N	CCCCCC\C=C/CCCCCCCCOCC(COP(O)(=O)OCCN)OC(=O)CCCCCCC\C=C/C\C=C/CCCCC	9.91276	698.507	[M-H]-	2930	171.97264:10 196.03777:20 255.22691:235 279.23465:861 418.27808:41 436.24902:31 436.28732:92 698.50476:305	FALSE	FALSE	FALSE	FALSE	FALSE	TRUE	3251.44	3075.19	3266.19	2437.25	3269.44	1285.44	1067.25	1303.31	1525.5	1497.88	2334	2708.88	3242.31	2280.62	2892.06	4146.62	4386.19	4443	4820.56	5374.94	1.18e-05	0.163346	0.000367	0.0001282	5e-07	0.0001177
Ether linked phospholipid	EtherPE	36:5e	16:1e	20:4		PE 16:1e/20:4	C41H74NO7P	YATSYZSZUULQDZ-GKPKDRHFNA-N	CCCCCC\C=C/CCCCCCCCOCC(COP(O)(=O)OCCN)OC(=O)CCCCCC\C=C/C\C=C/C\C=C/C\C=C/CC	9.84938	722.507	[M-H]-	38928	78.9589:153 109.06619:10 122.00098:31 135.08253:10 140.0087:143 163.08167:31 177.08977:41 179.03661:41 191.10692:31 196.03421:206 203.1846:10 205.19478:163 231.20734:31 239.2356:235 257.22839:31 259.24188:543 285.21307:61 301.22083:31 302.27231:41 303.11923:29 303.23224:8854 375.21509:71 418.25815:469 436.28461:1403 482.27536:31 722.5144:2065	FALSE	FALSE	TRUE	FALSE	FALSE	TRUE	58609.2	46150.6	50591.4	50517.9	53640.1	47018.2	37786.2	57046	58931.6	51034.6	21645.9	23265.3	29163.8	22532.9	25892.5	24790.4	32262.7	30318.1	29133.2	28229.9	0.730726	3.9e-06	1.19e-05	0.0002059	0.0006729	0.0423201
[truncated: 310 more rows]

## Sheet: Spleen
																					Mouse_Spleen_WT_N_F1	Mouse_Spleen_WT_N_F1	Mouse_Spleen_WT_N_F1	Mouse_Spleen_WT_N_F1	Mouse_Spleen_WT_N_F1	Mouse_Spleen_WT_N_F1AA	Mouse_Spleen_WT_N_F1AA	Mouse_Spleen_WT_N_F1AA	Mouse_Spleen_WT_N_F1AA	Mouse_Spleen_WT_N_F1AA	Mouse_Spleen_WT_N_F1EPA	Mouse_Spleen_WT_N_F1EPA	Mouse_Spleen_WT_N_F1EPA	Mouse_Spleen_WT_N_F1EPA	Mouse_Spleen_WT_N_F1EPA	Mouse_Spleen_WT_N_F1DHA	Mouse_Spleen_WT_N_F1DHA	Mouse_Spleen_WT_N_F1DHA	Mouse_Spleen_WT_N_F1DHA	Mouse_Spleen_WT_N_F1DHA
[truncated: 412 more rows]

[truncated: 6 more sheets: Lung, Small intestine, Muscle, Adipose, Heart, Brain]
