# Supplementary figures and images for: Characterization of Lipid Profiles after Dietary Intake of Polyunsaturated Fatty Acids Using Integrated Untargeted and Targeted Lipidomics
Source: MDPI journal article supplement (doi:10.3390/metabo9100241), 2019-10-21

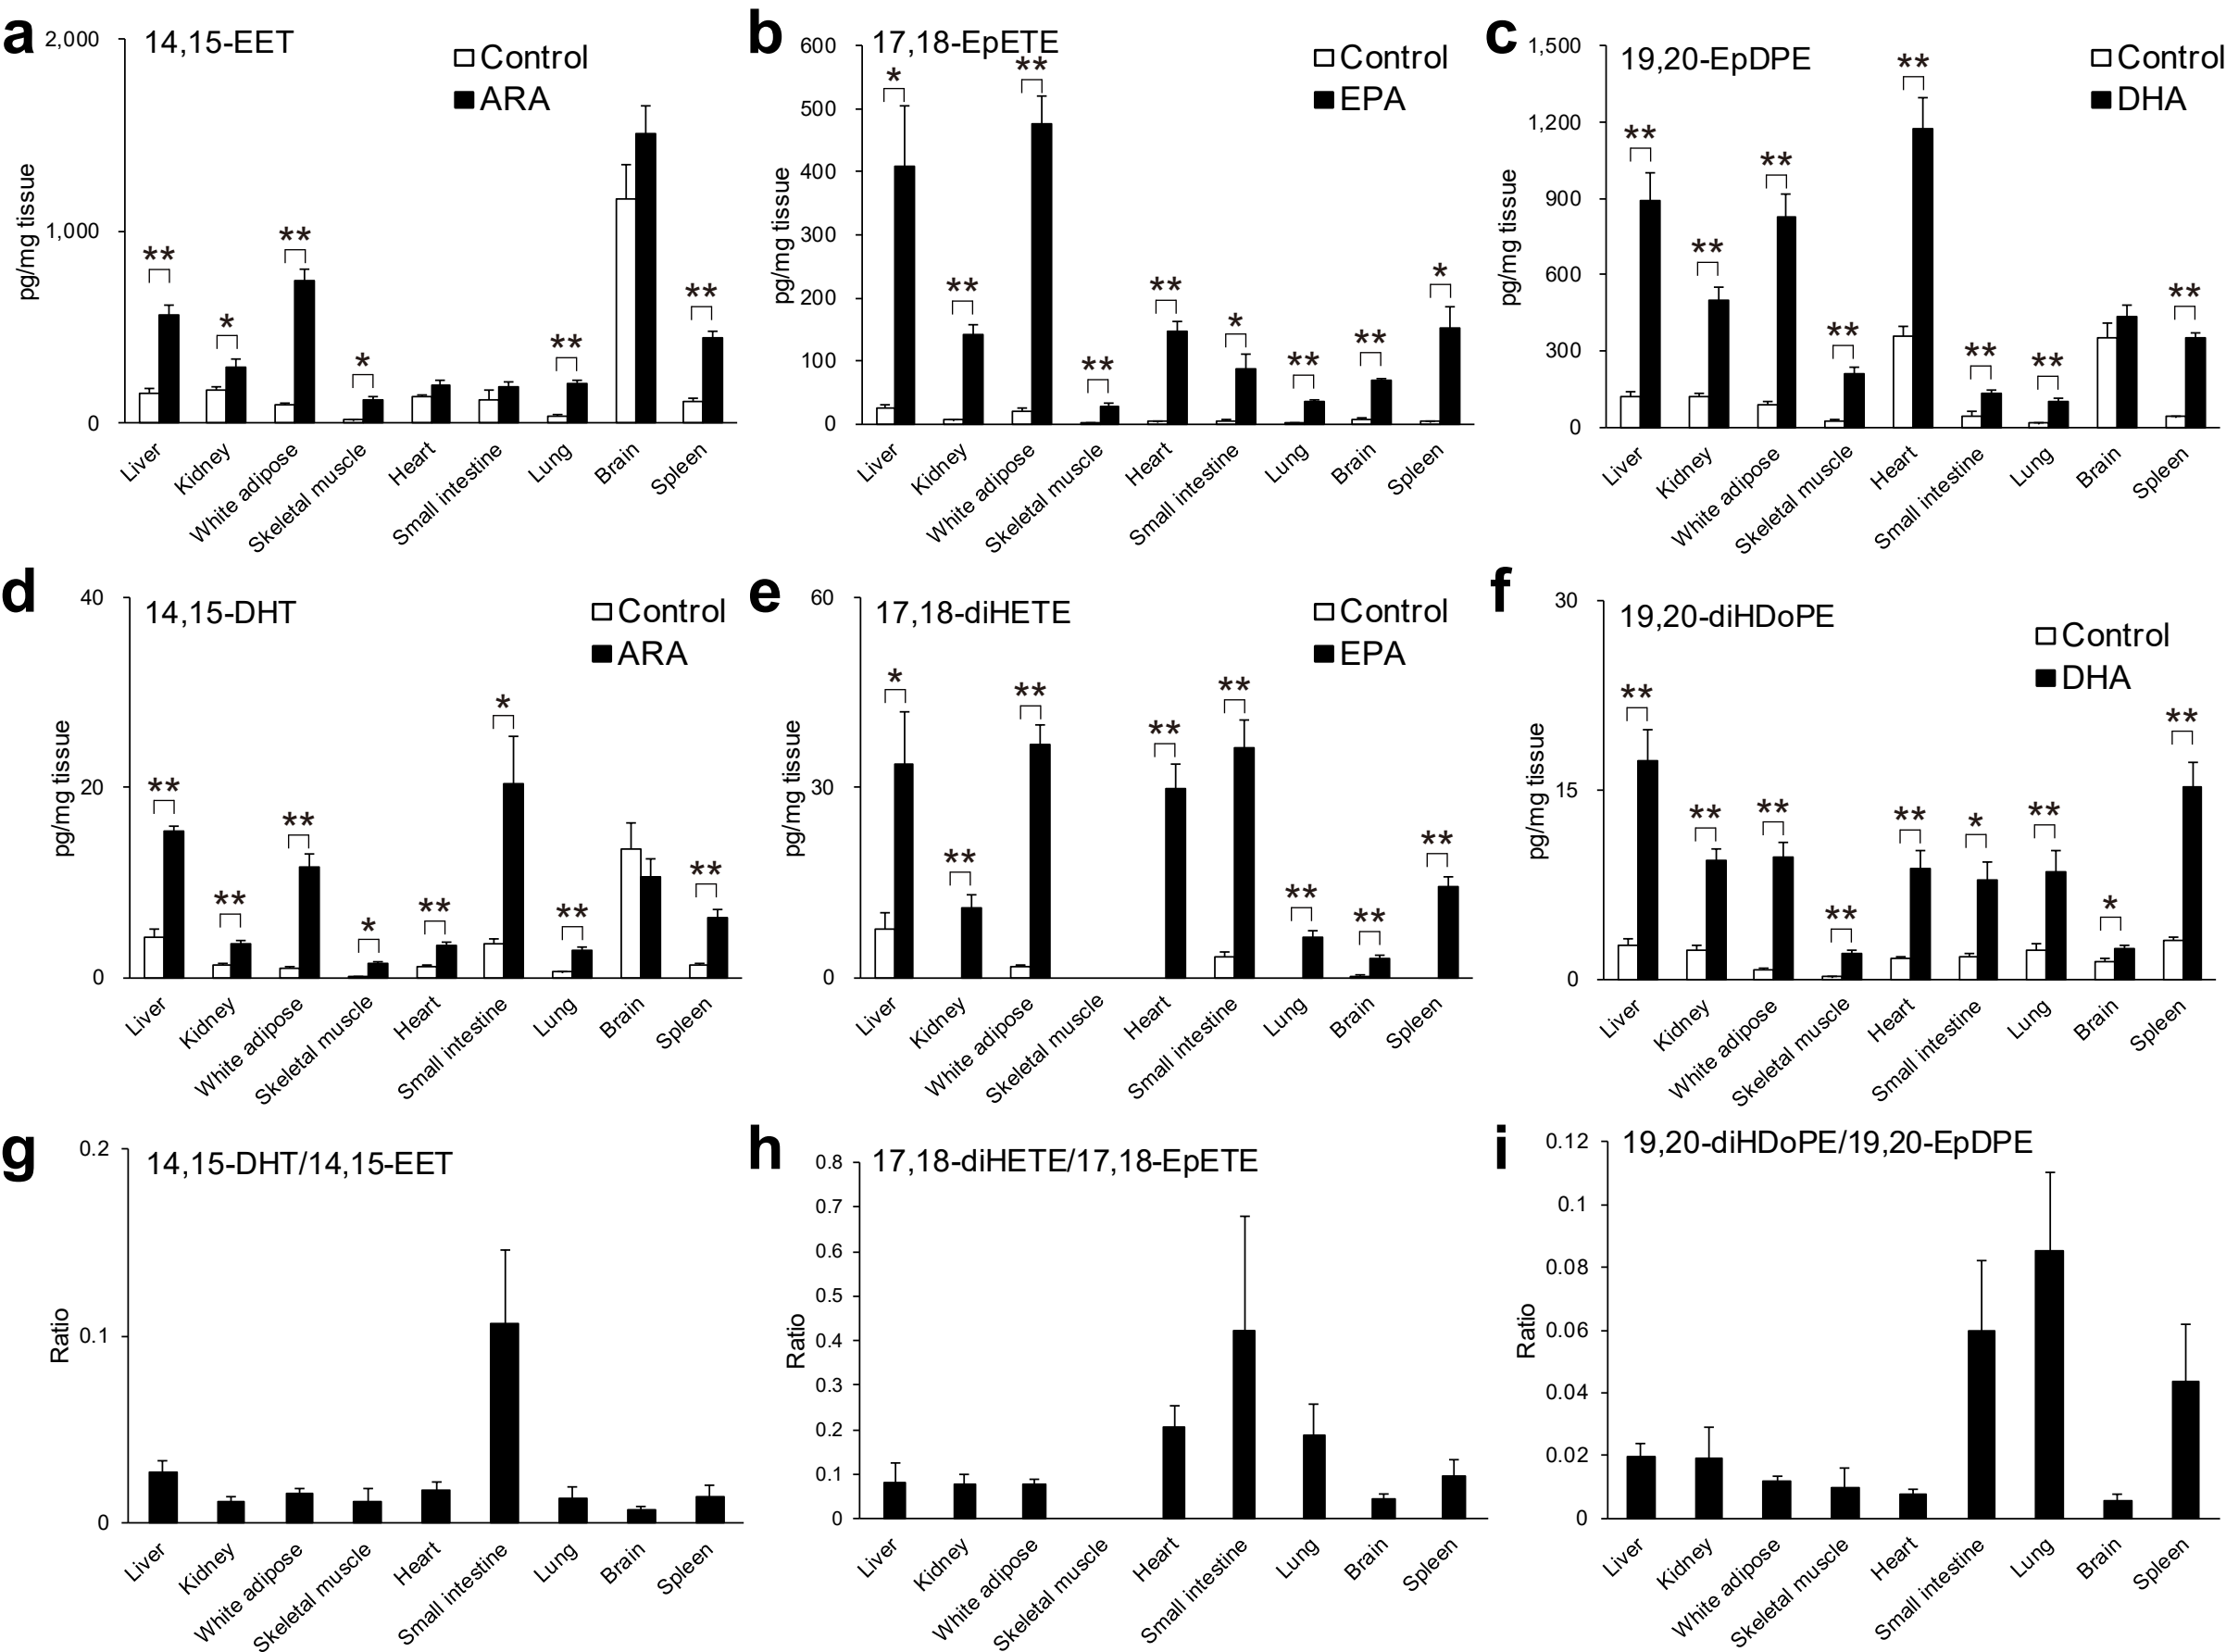

Supplement: s1 [file s1]

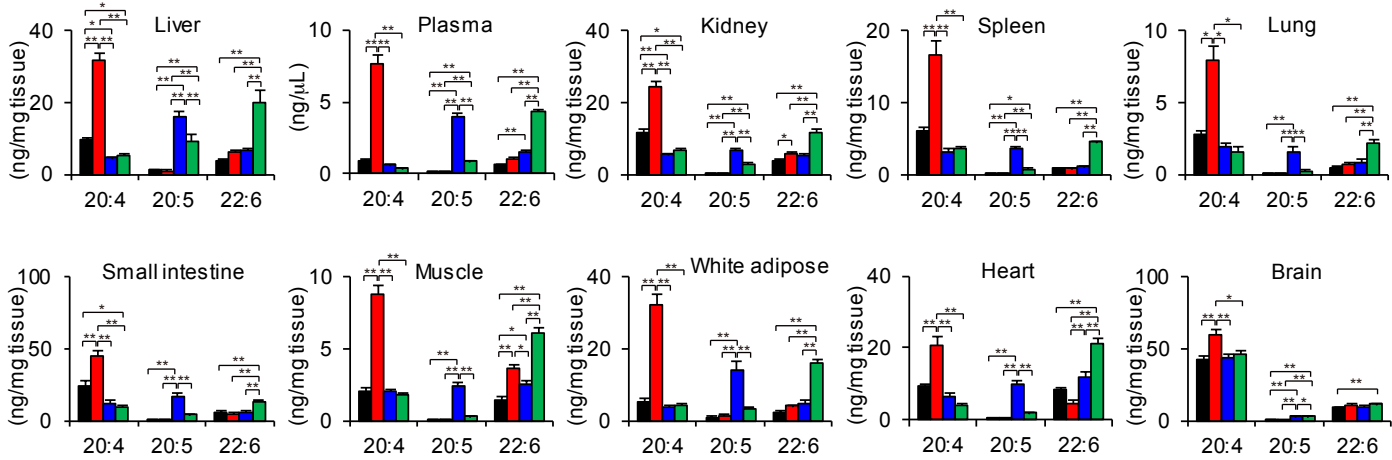

Supplement: s1 [file s1]

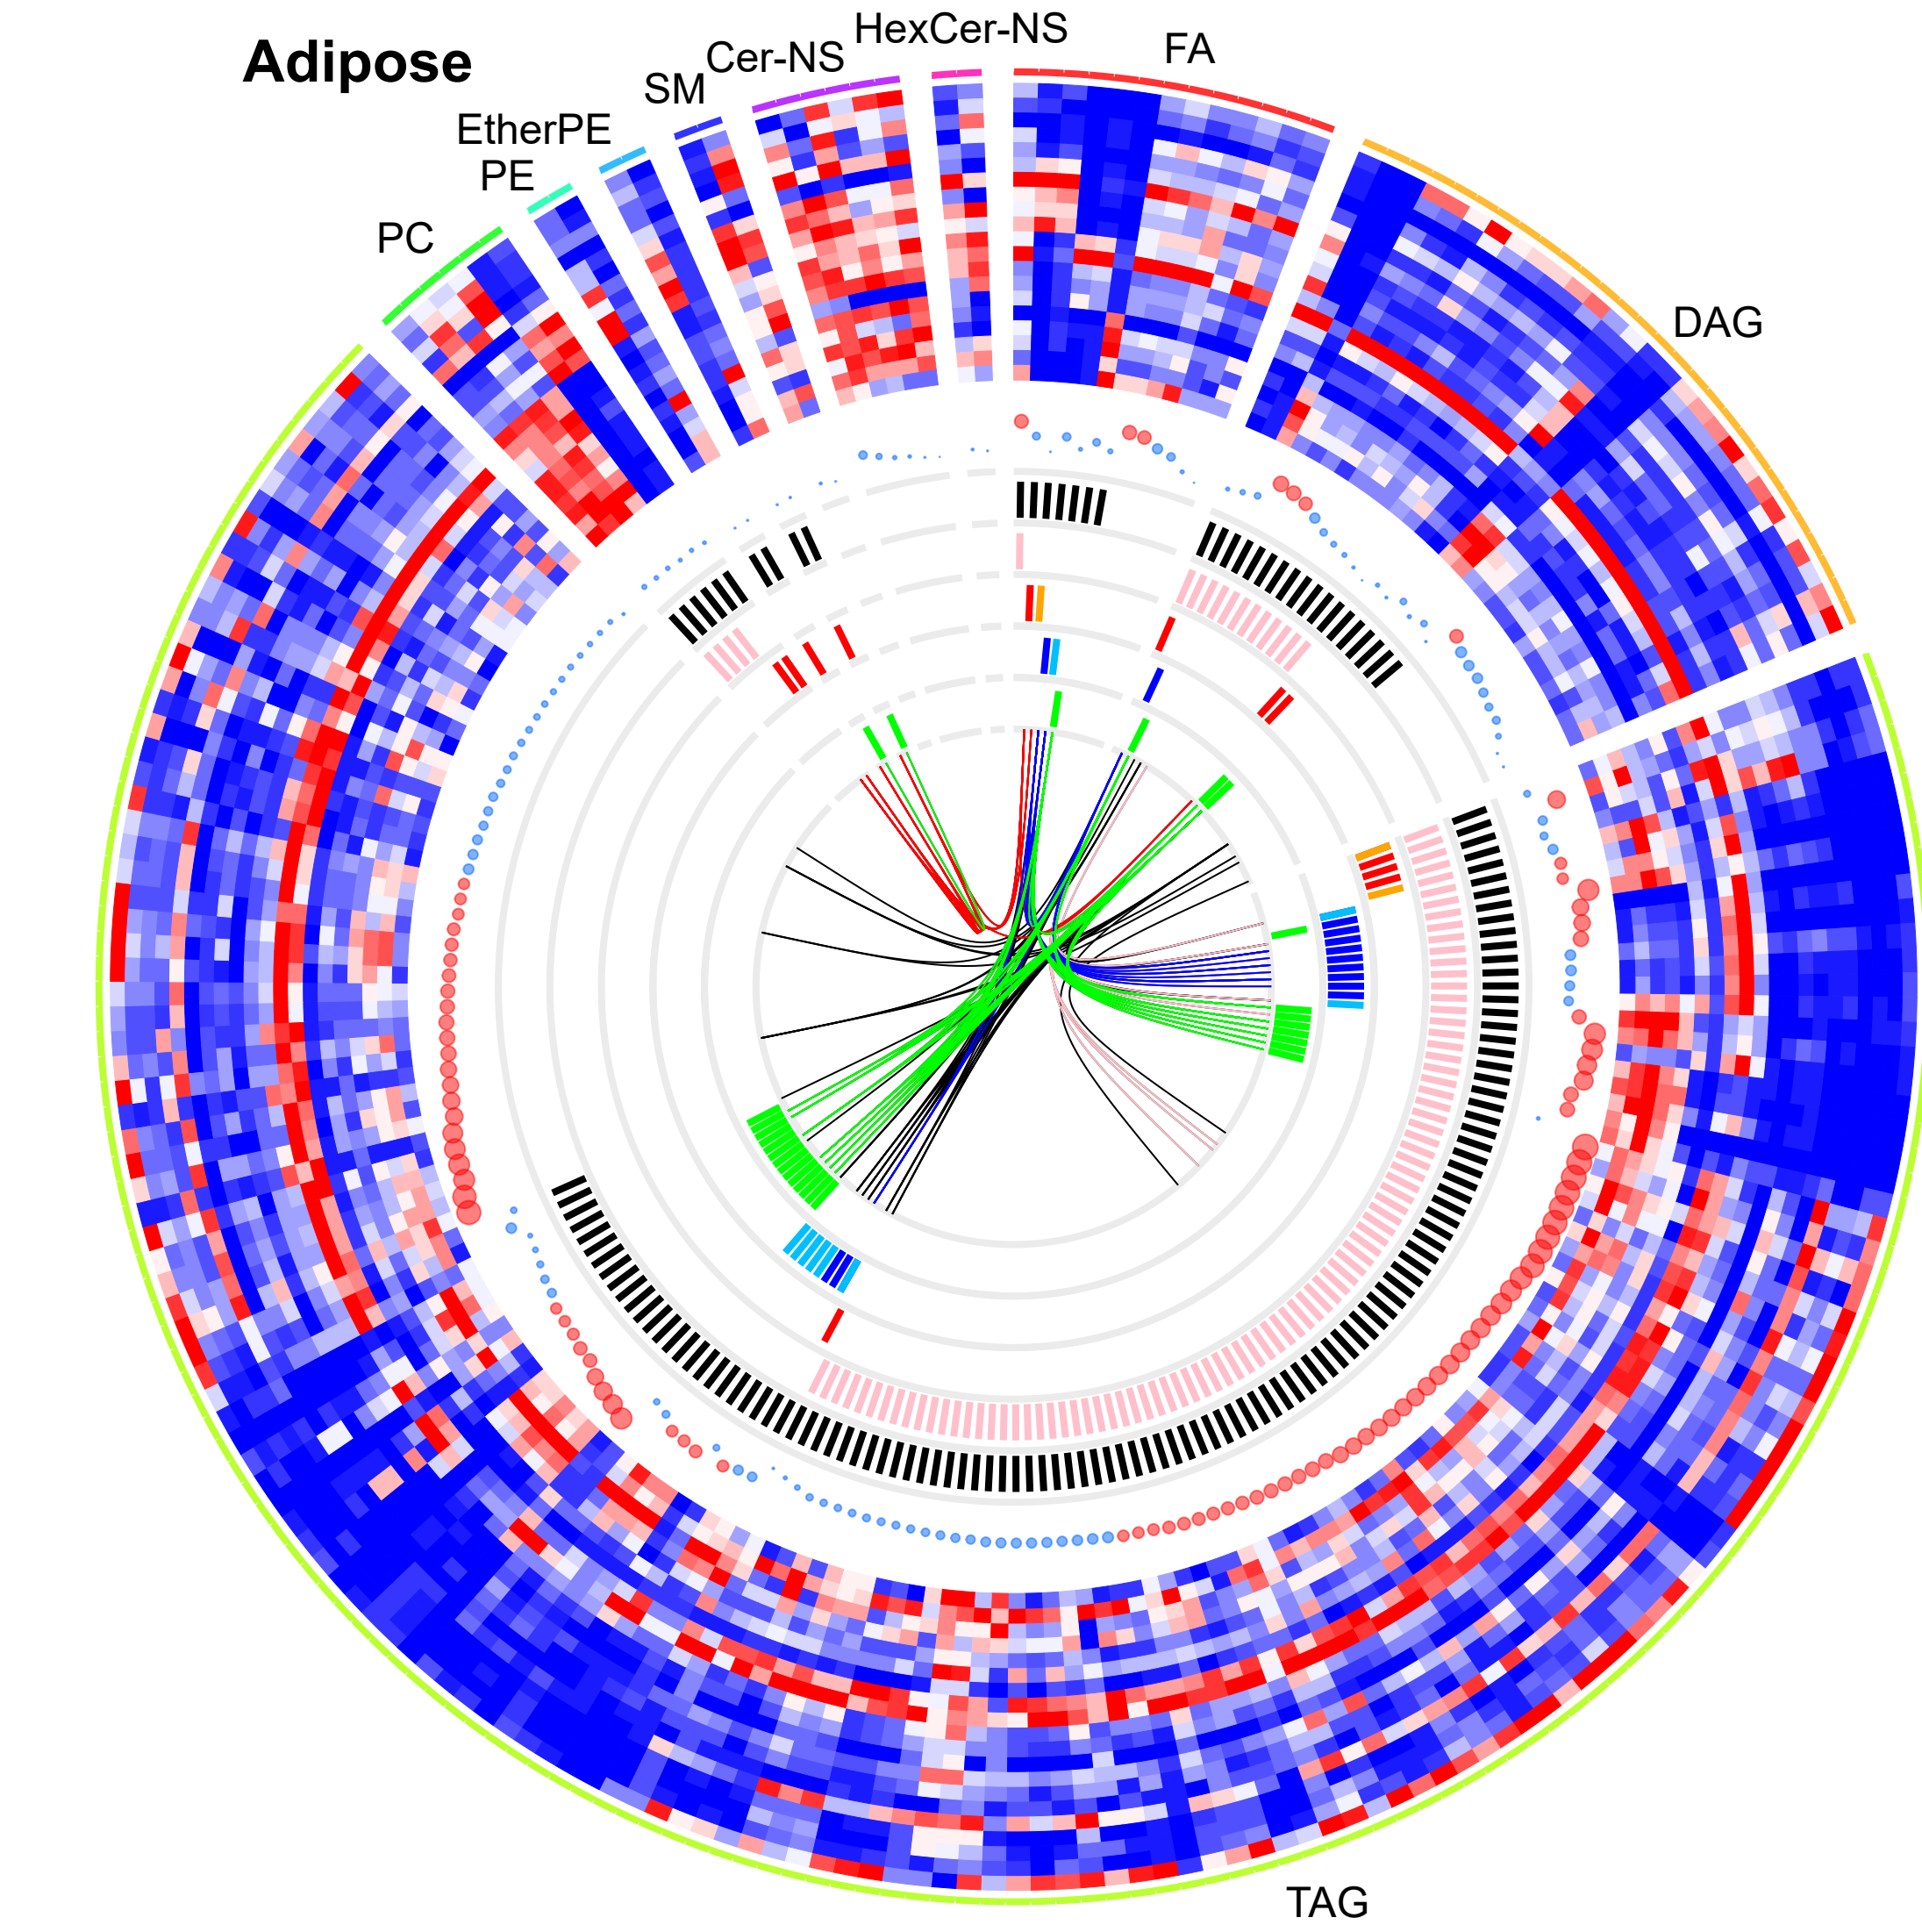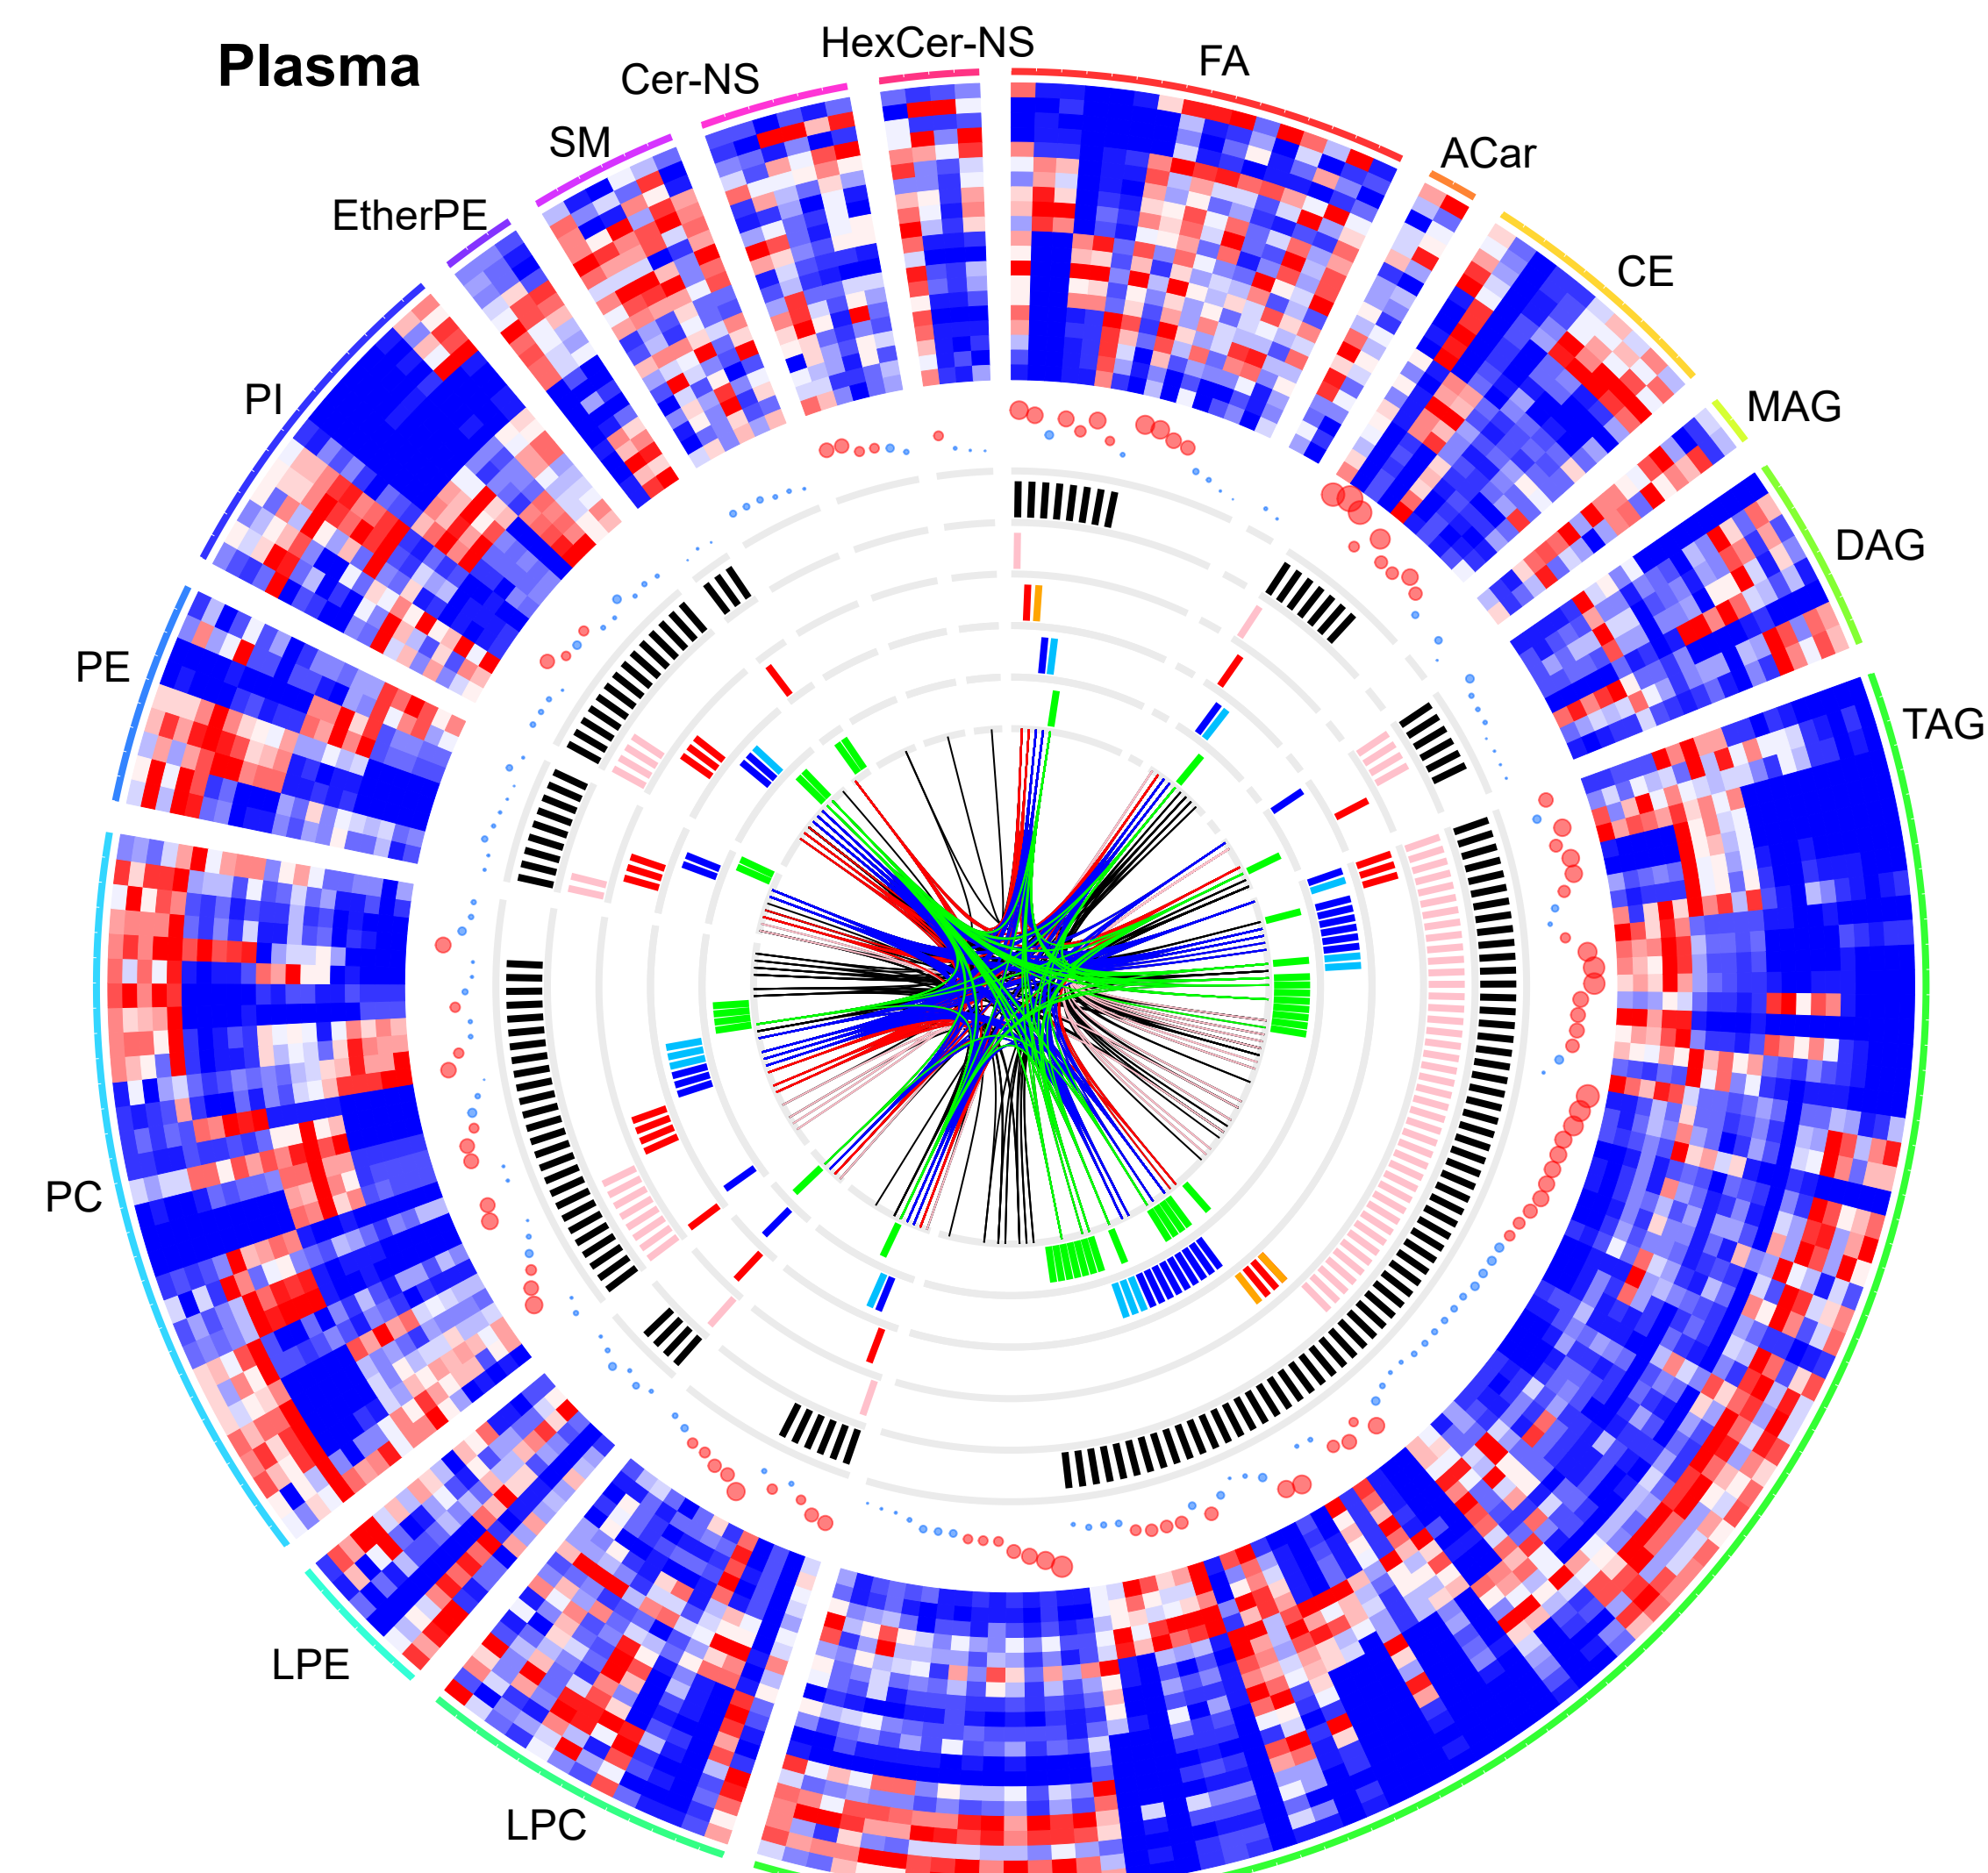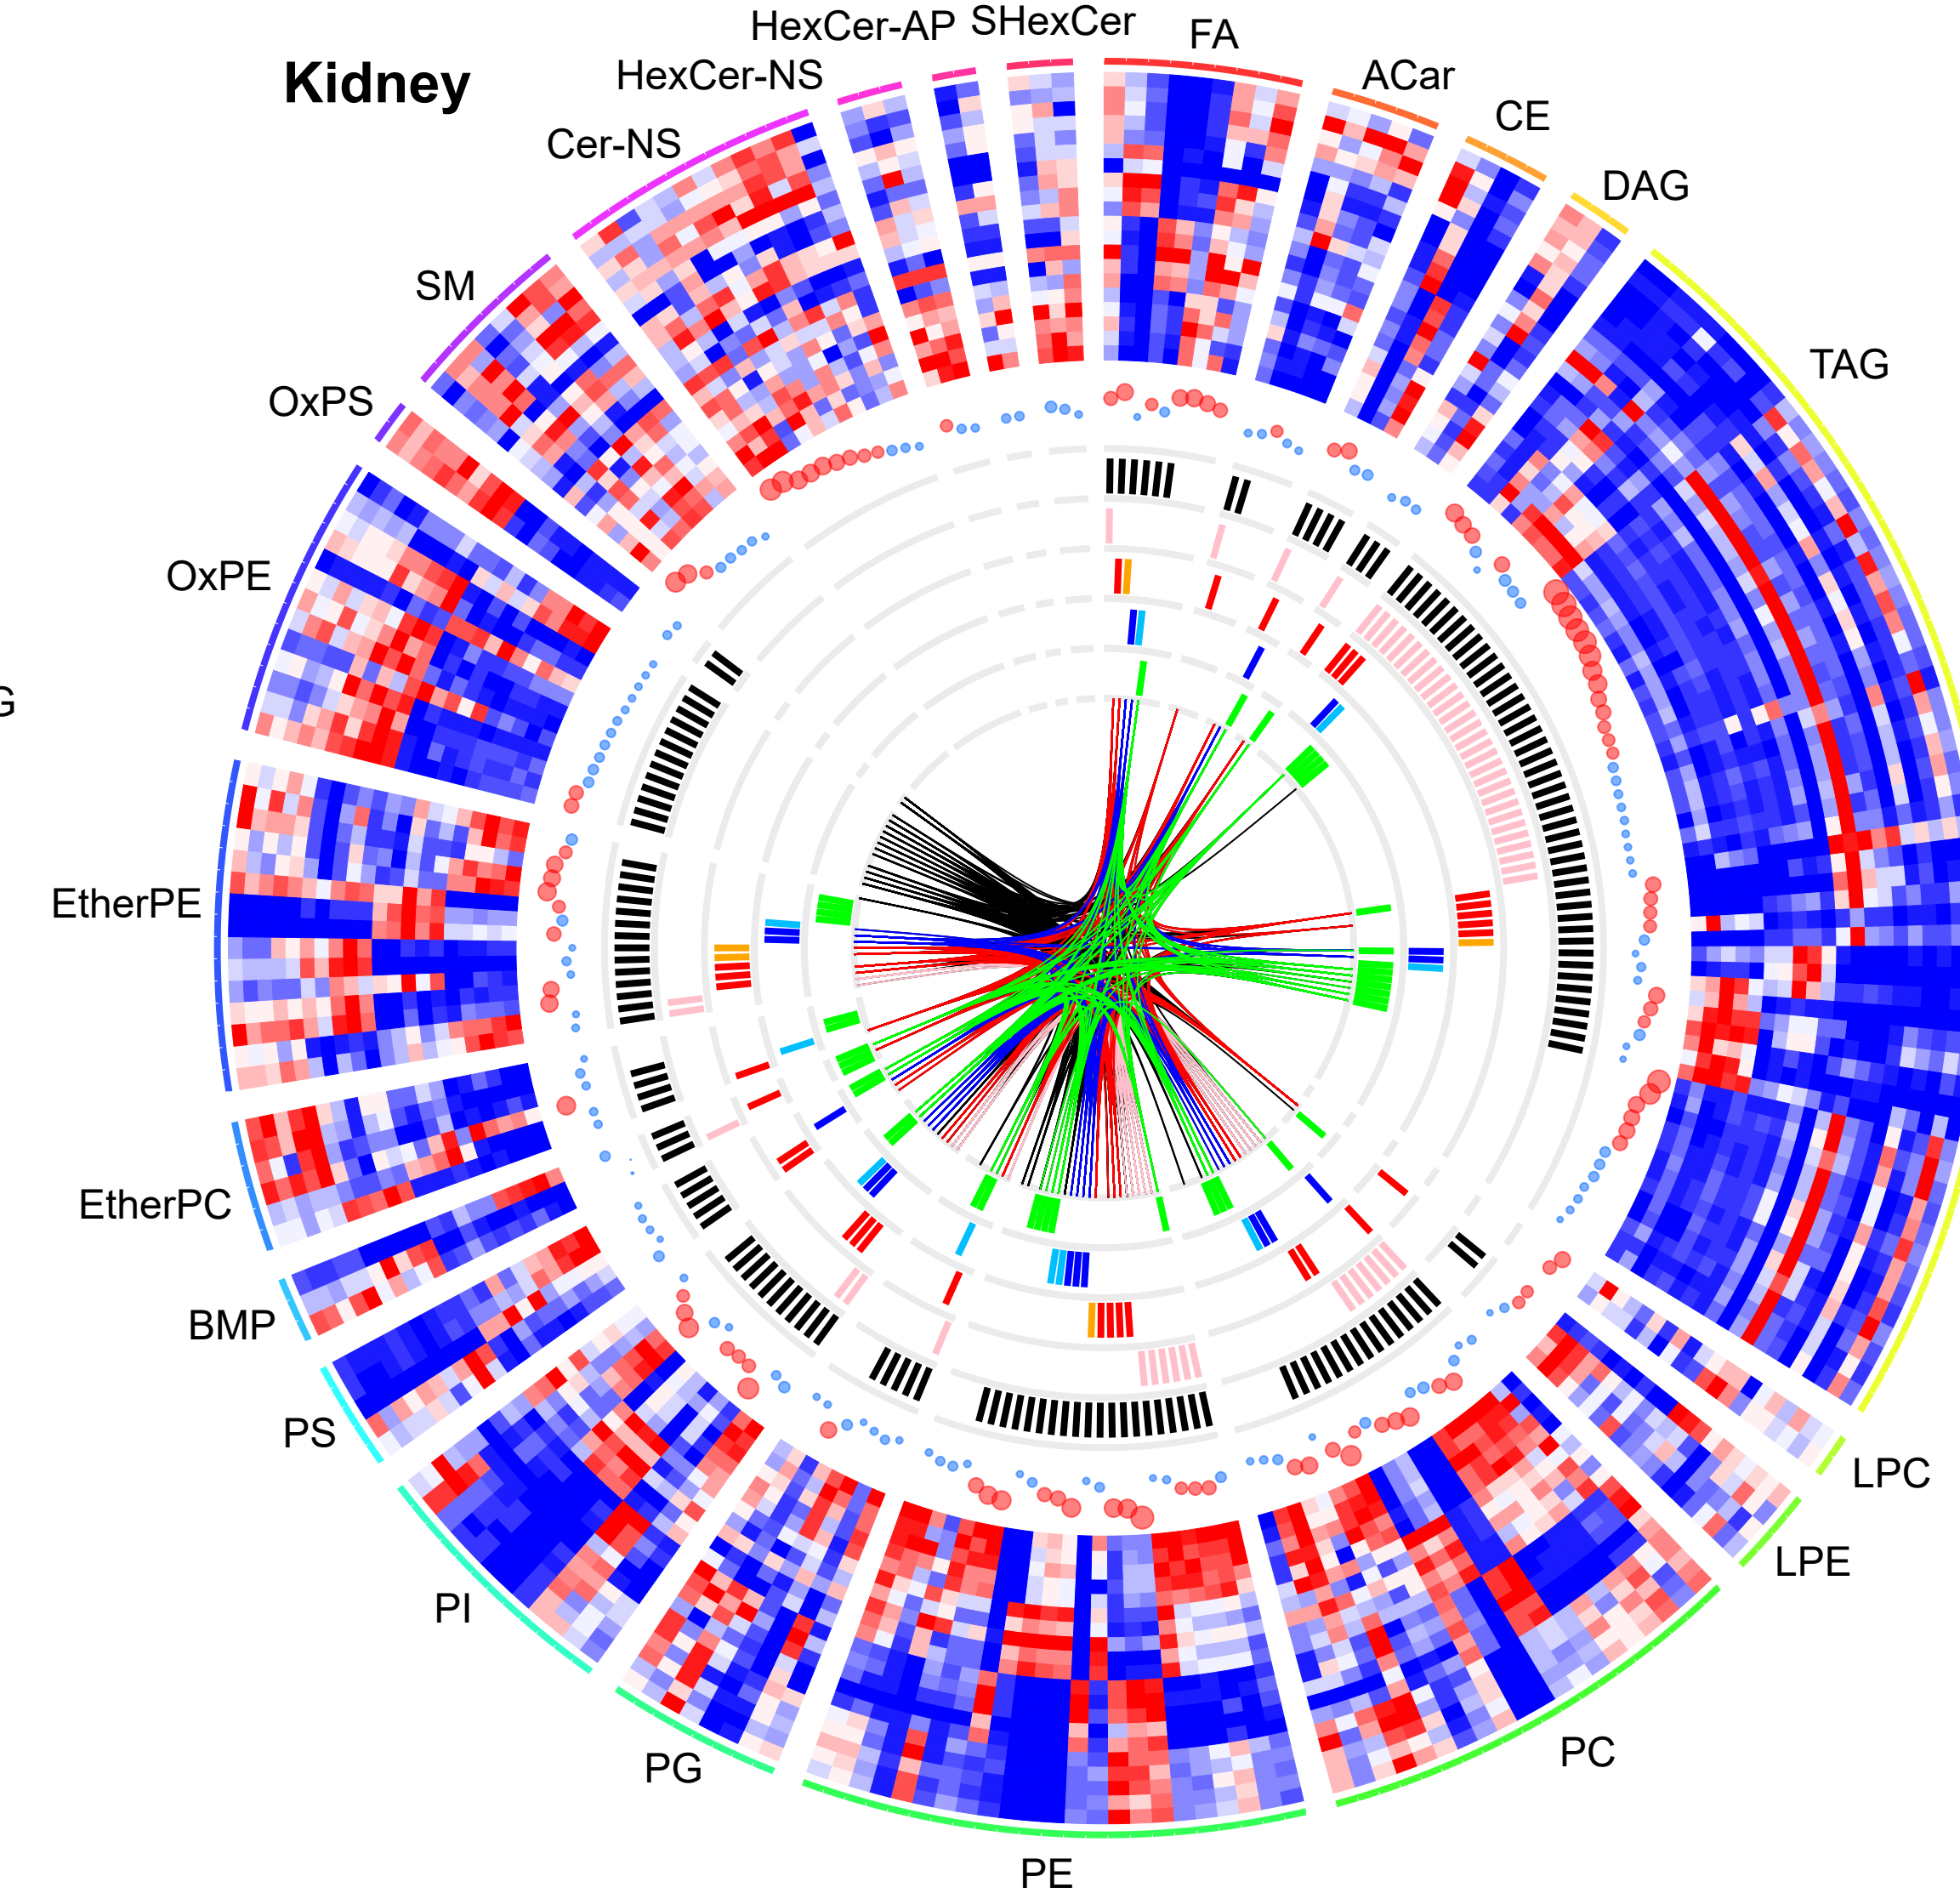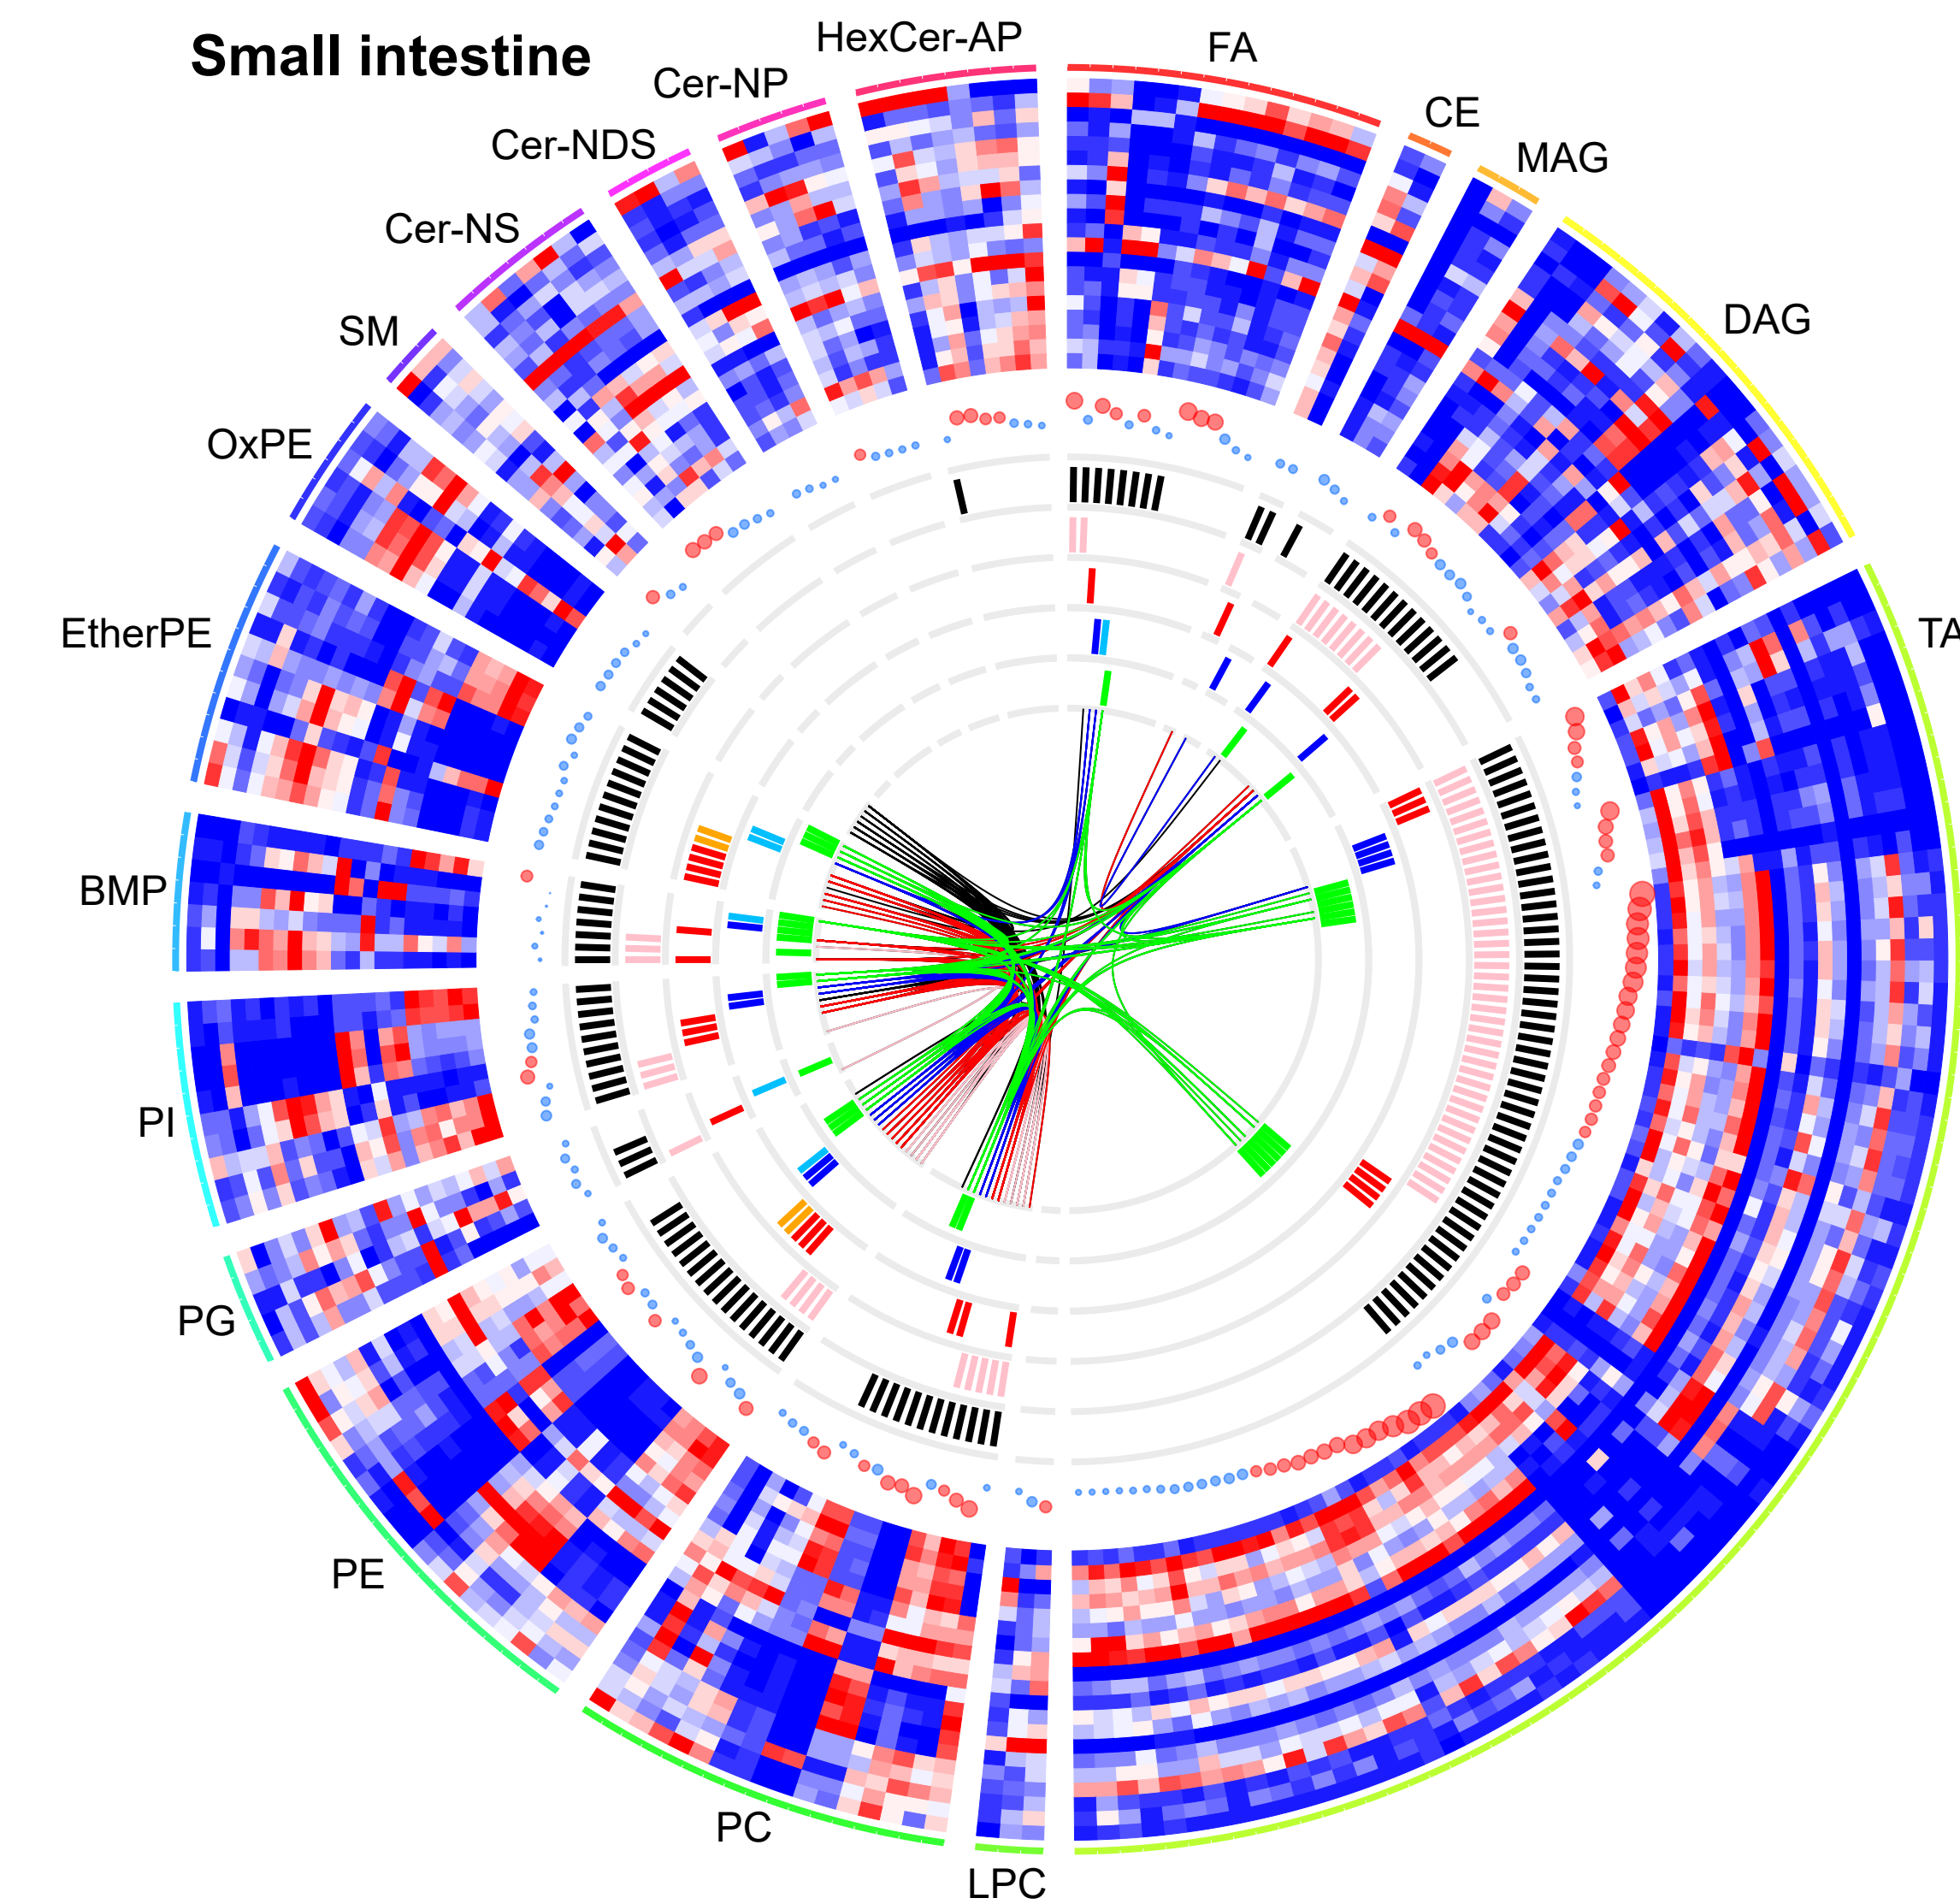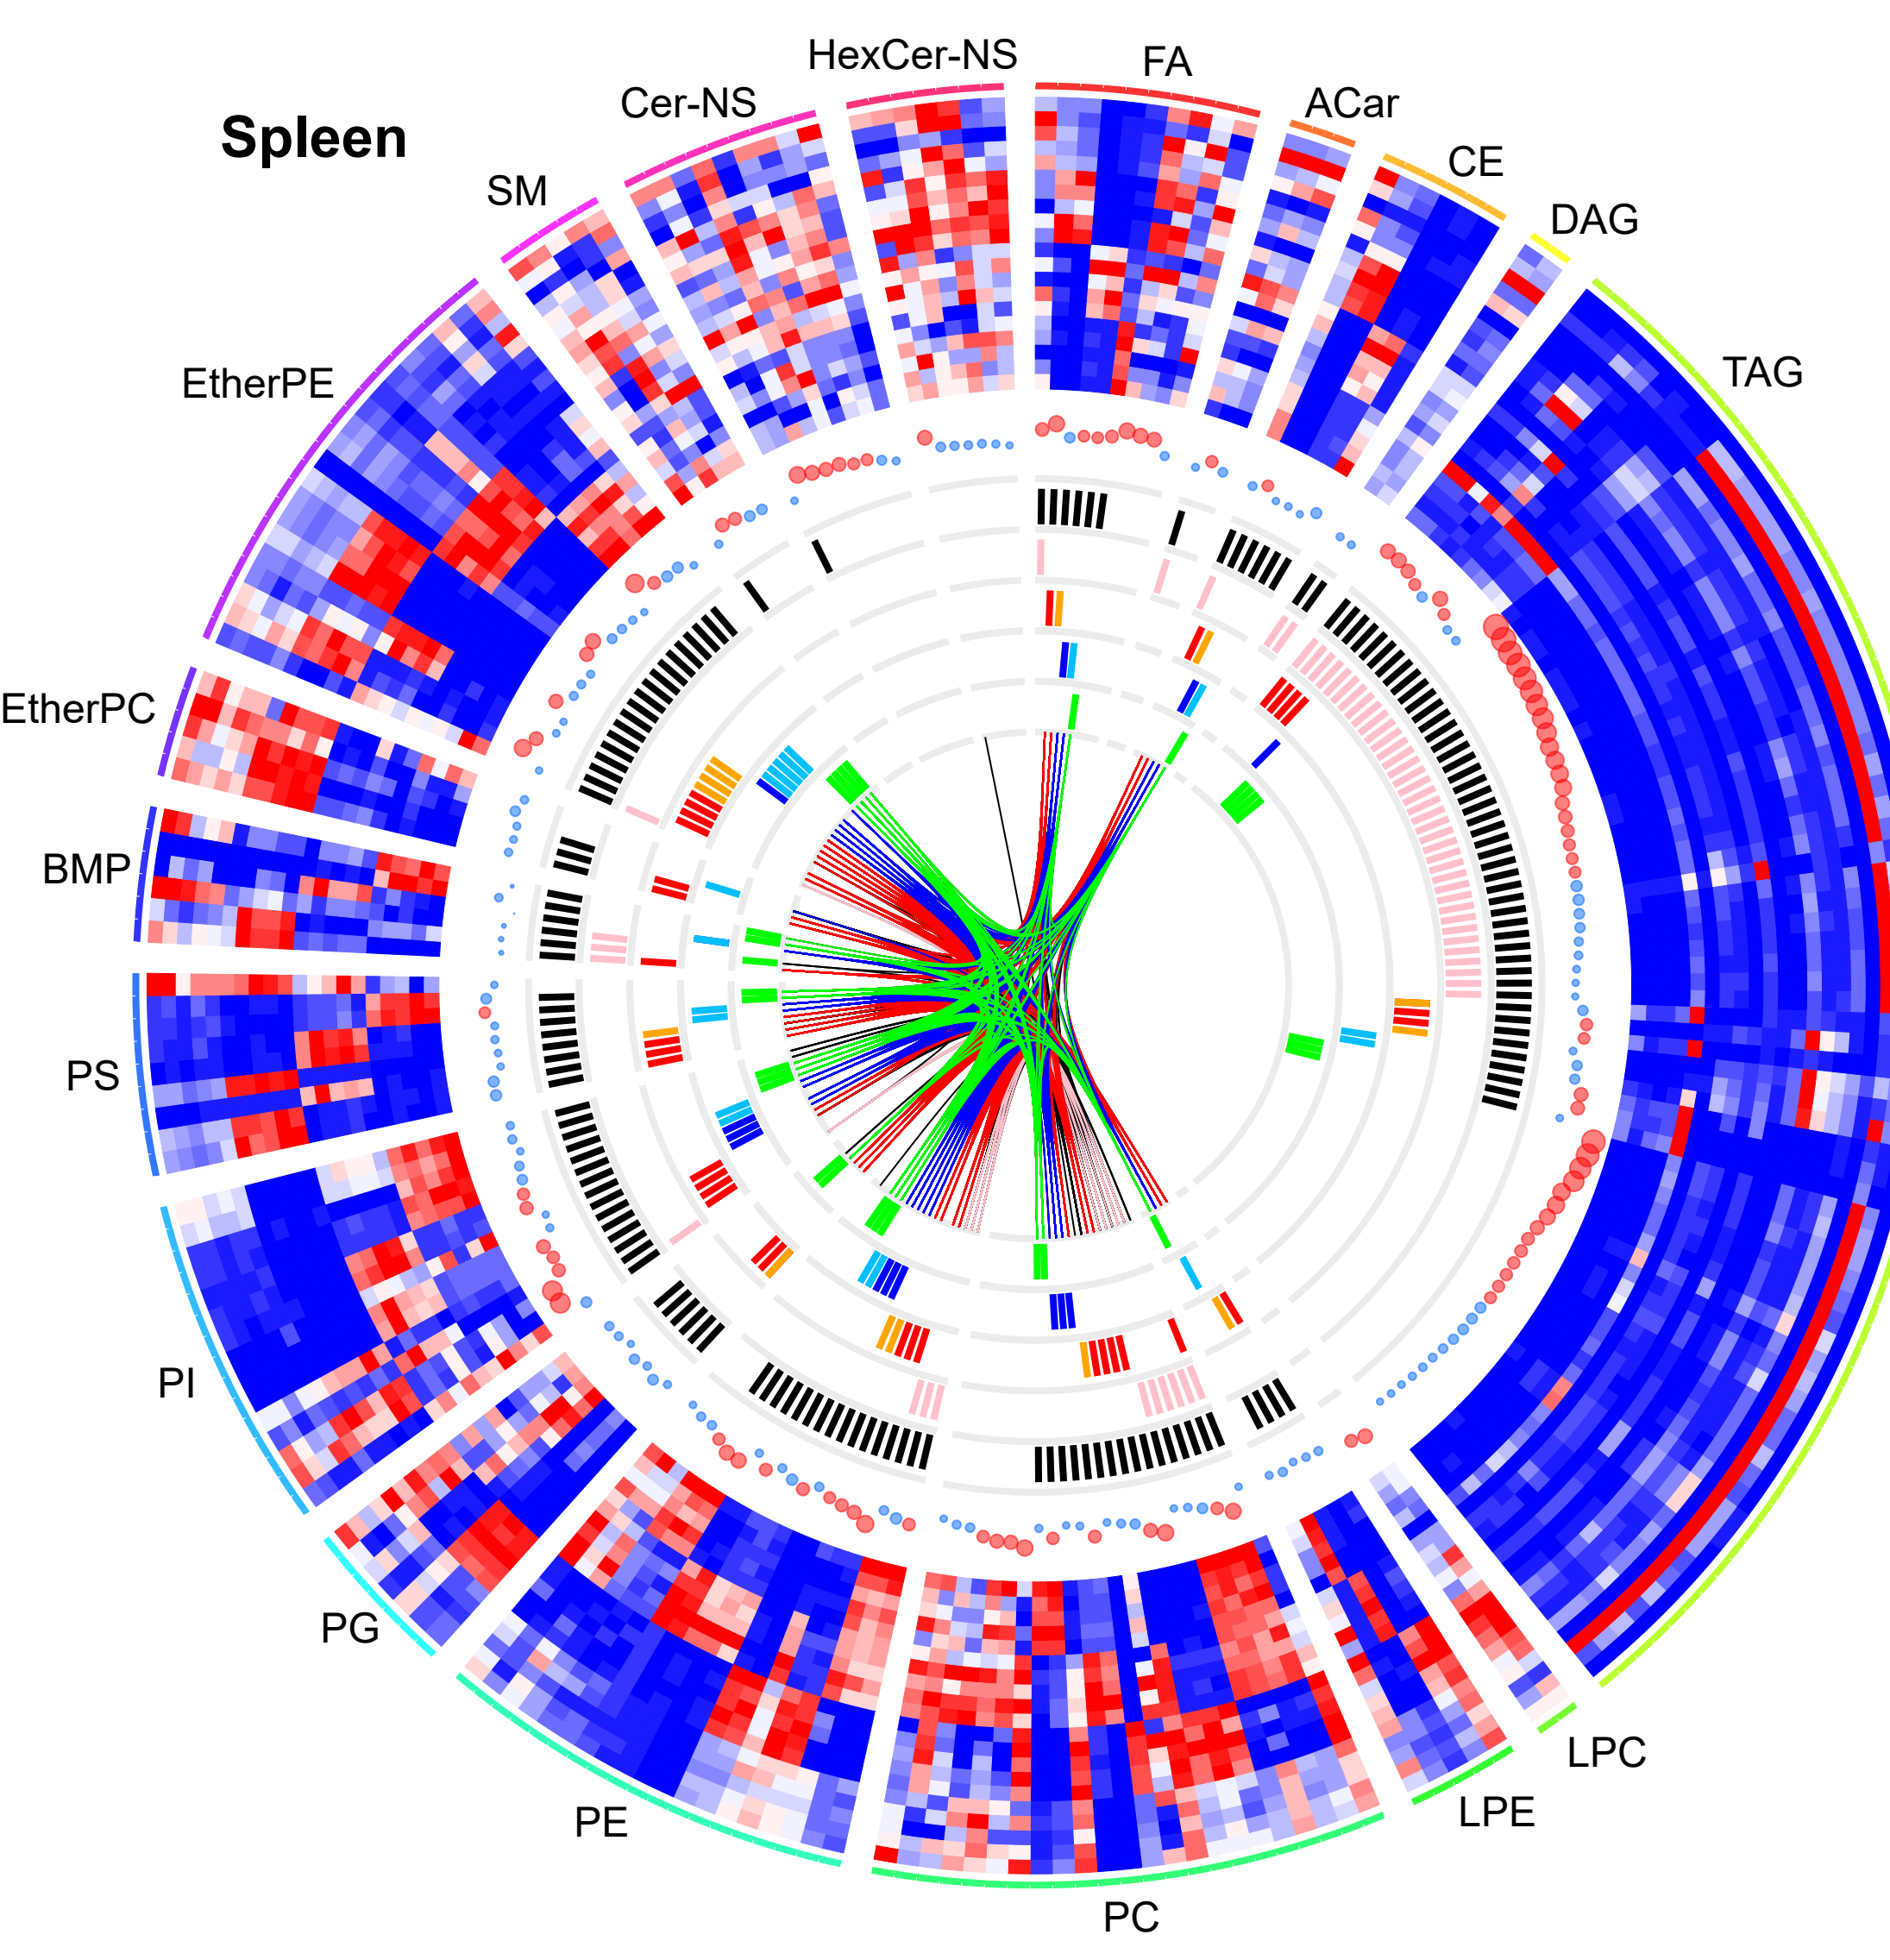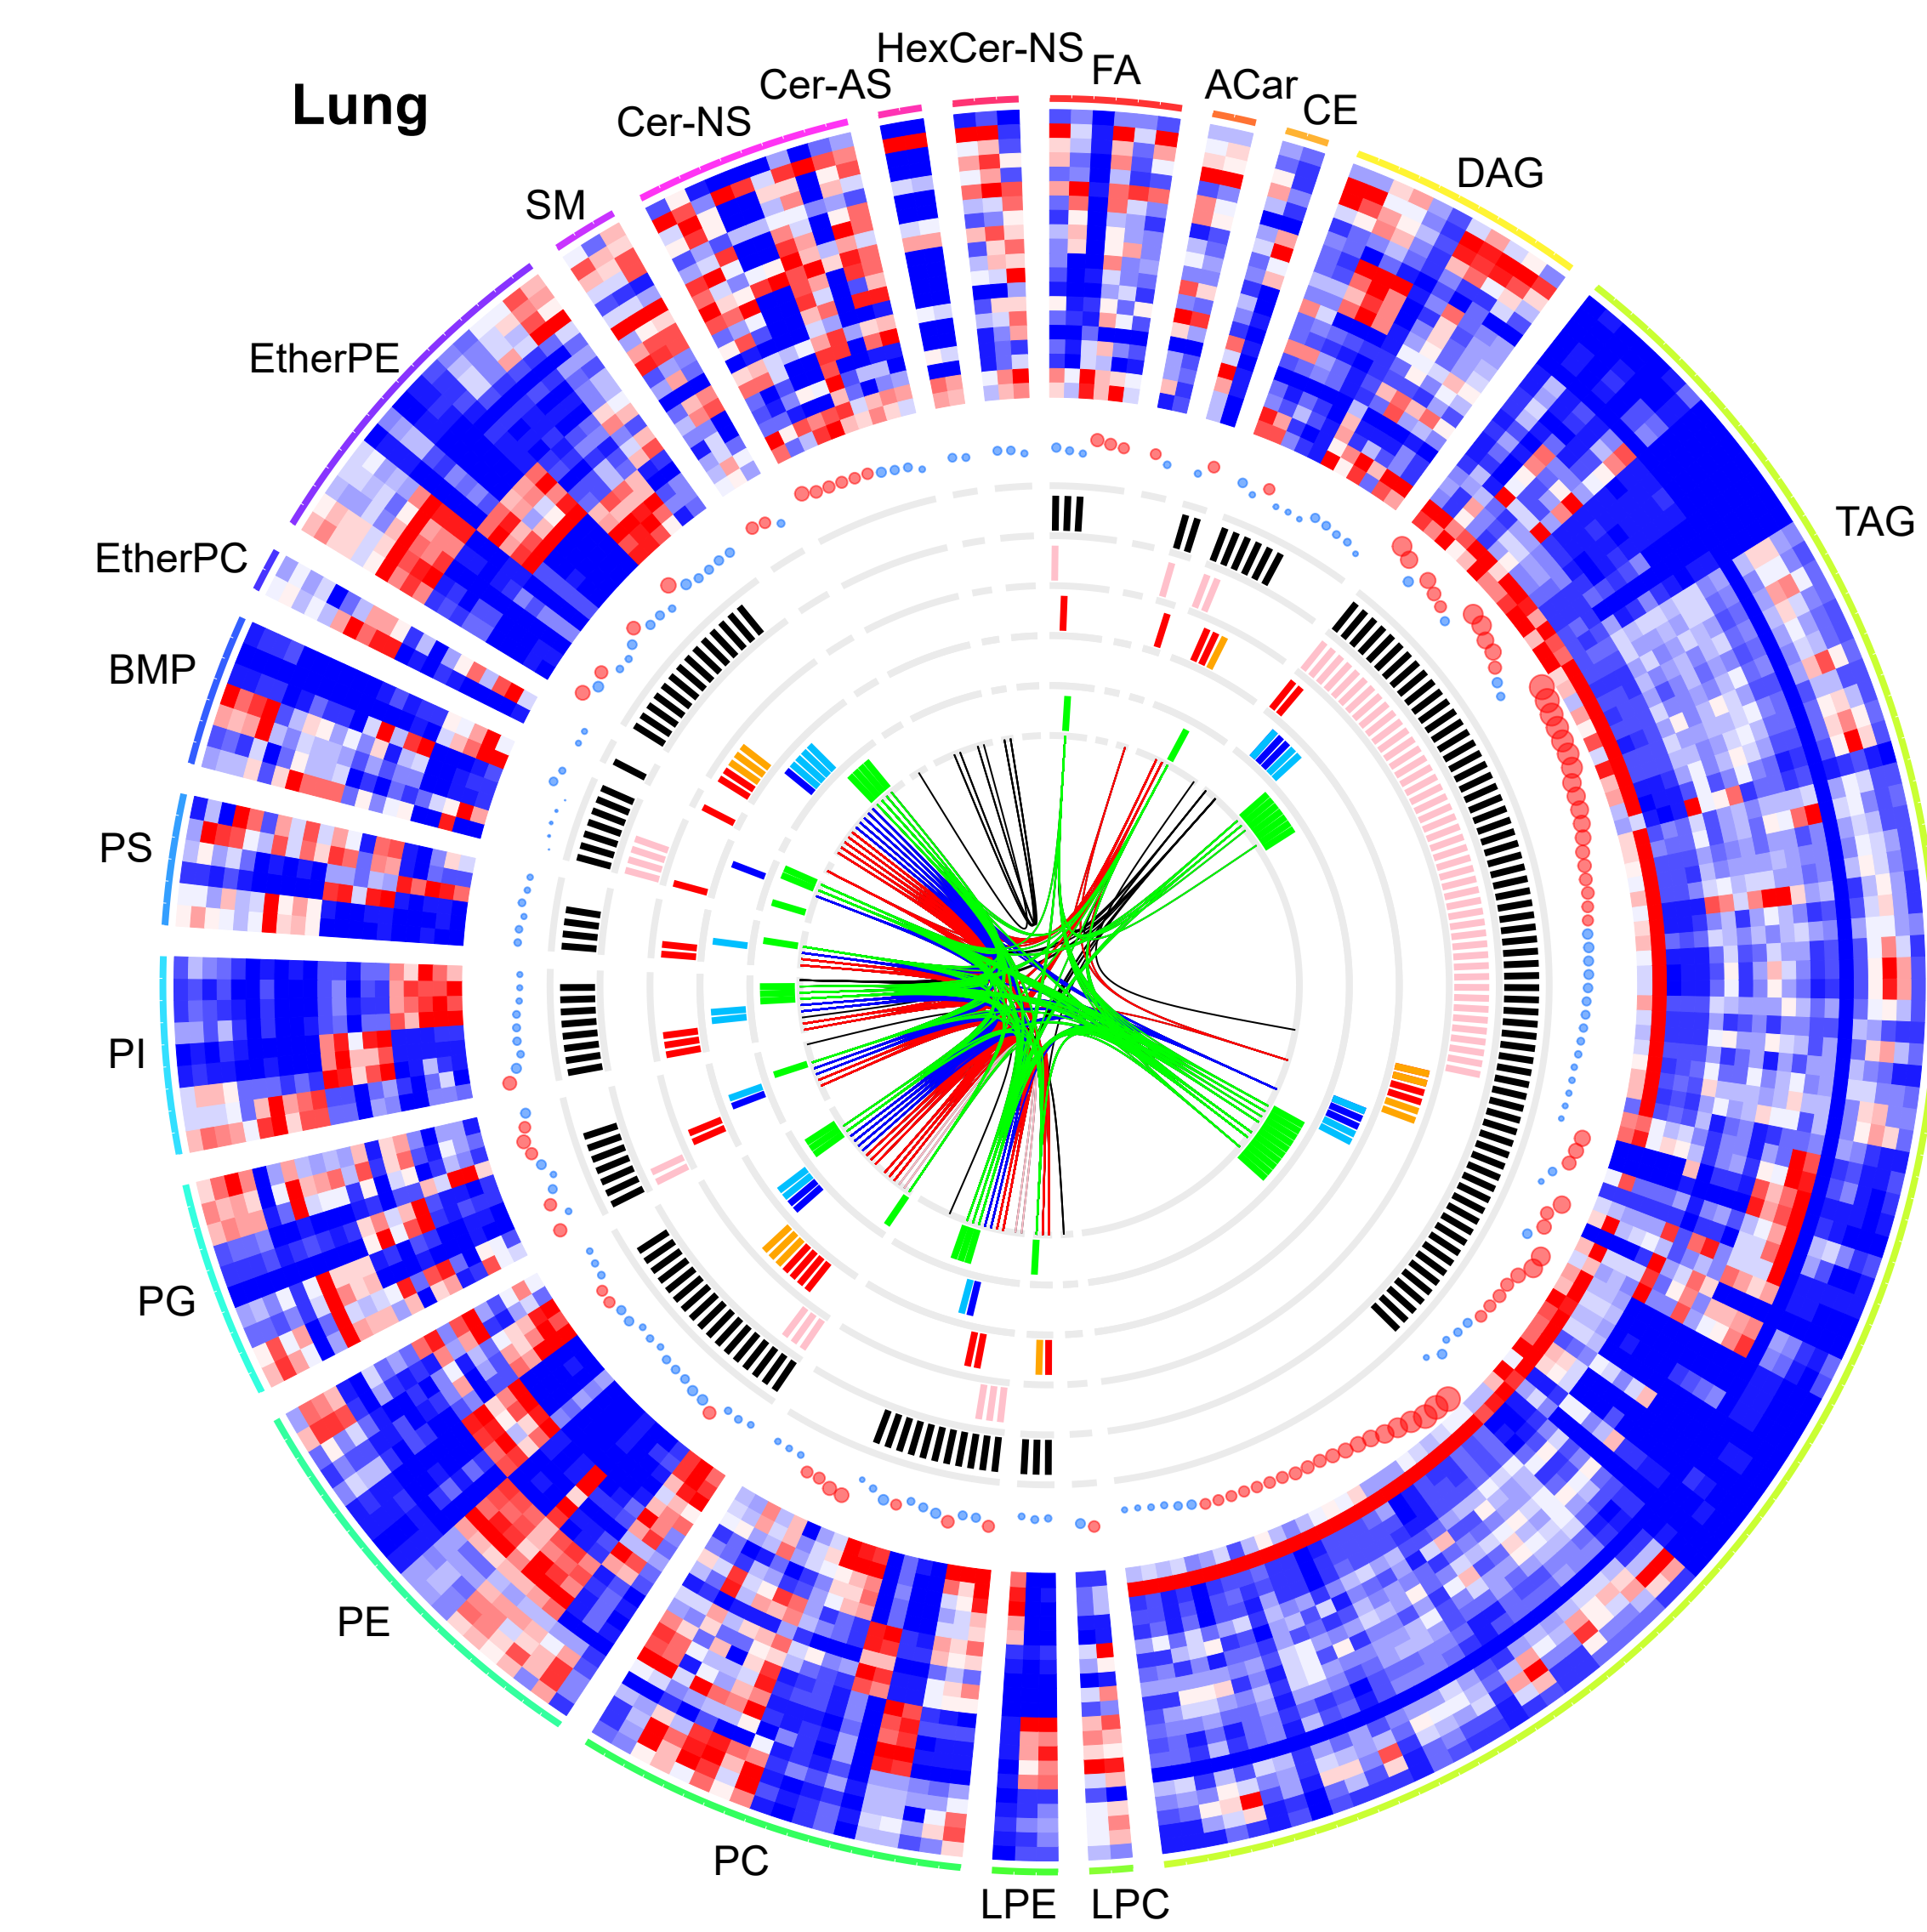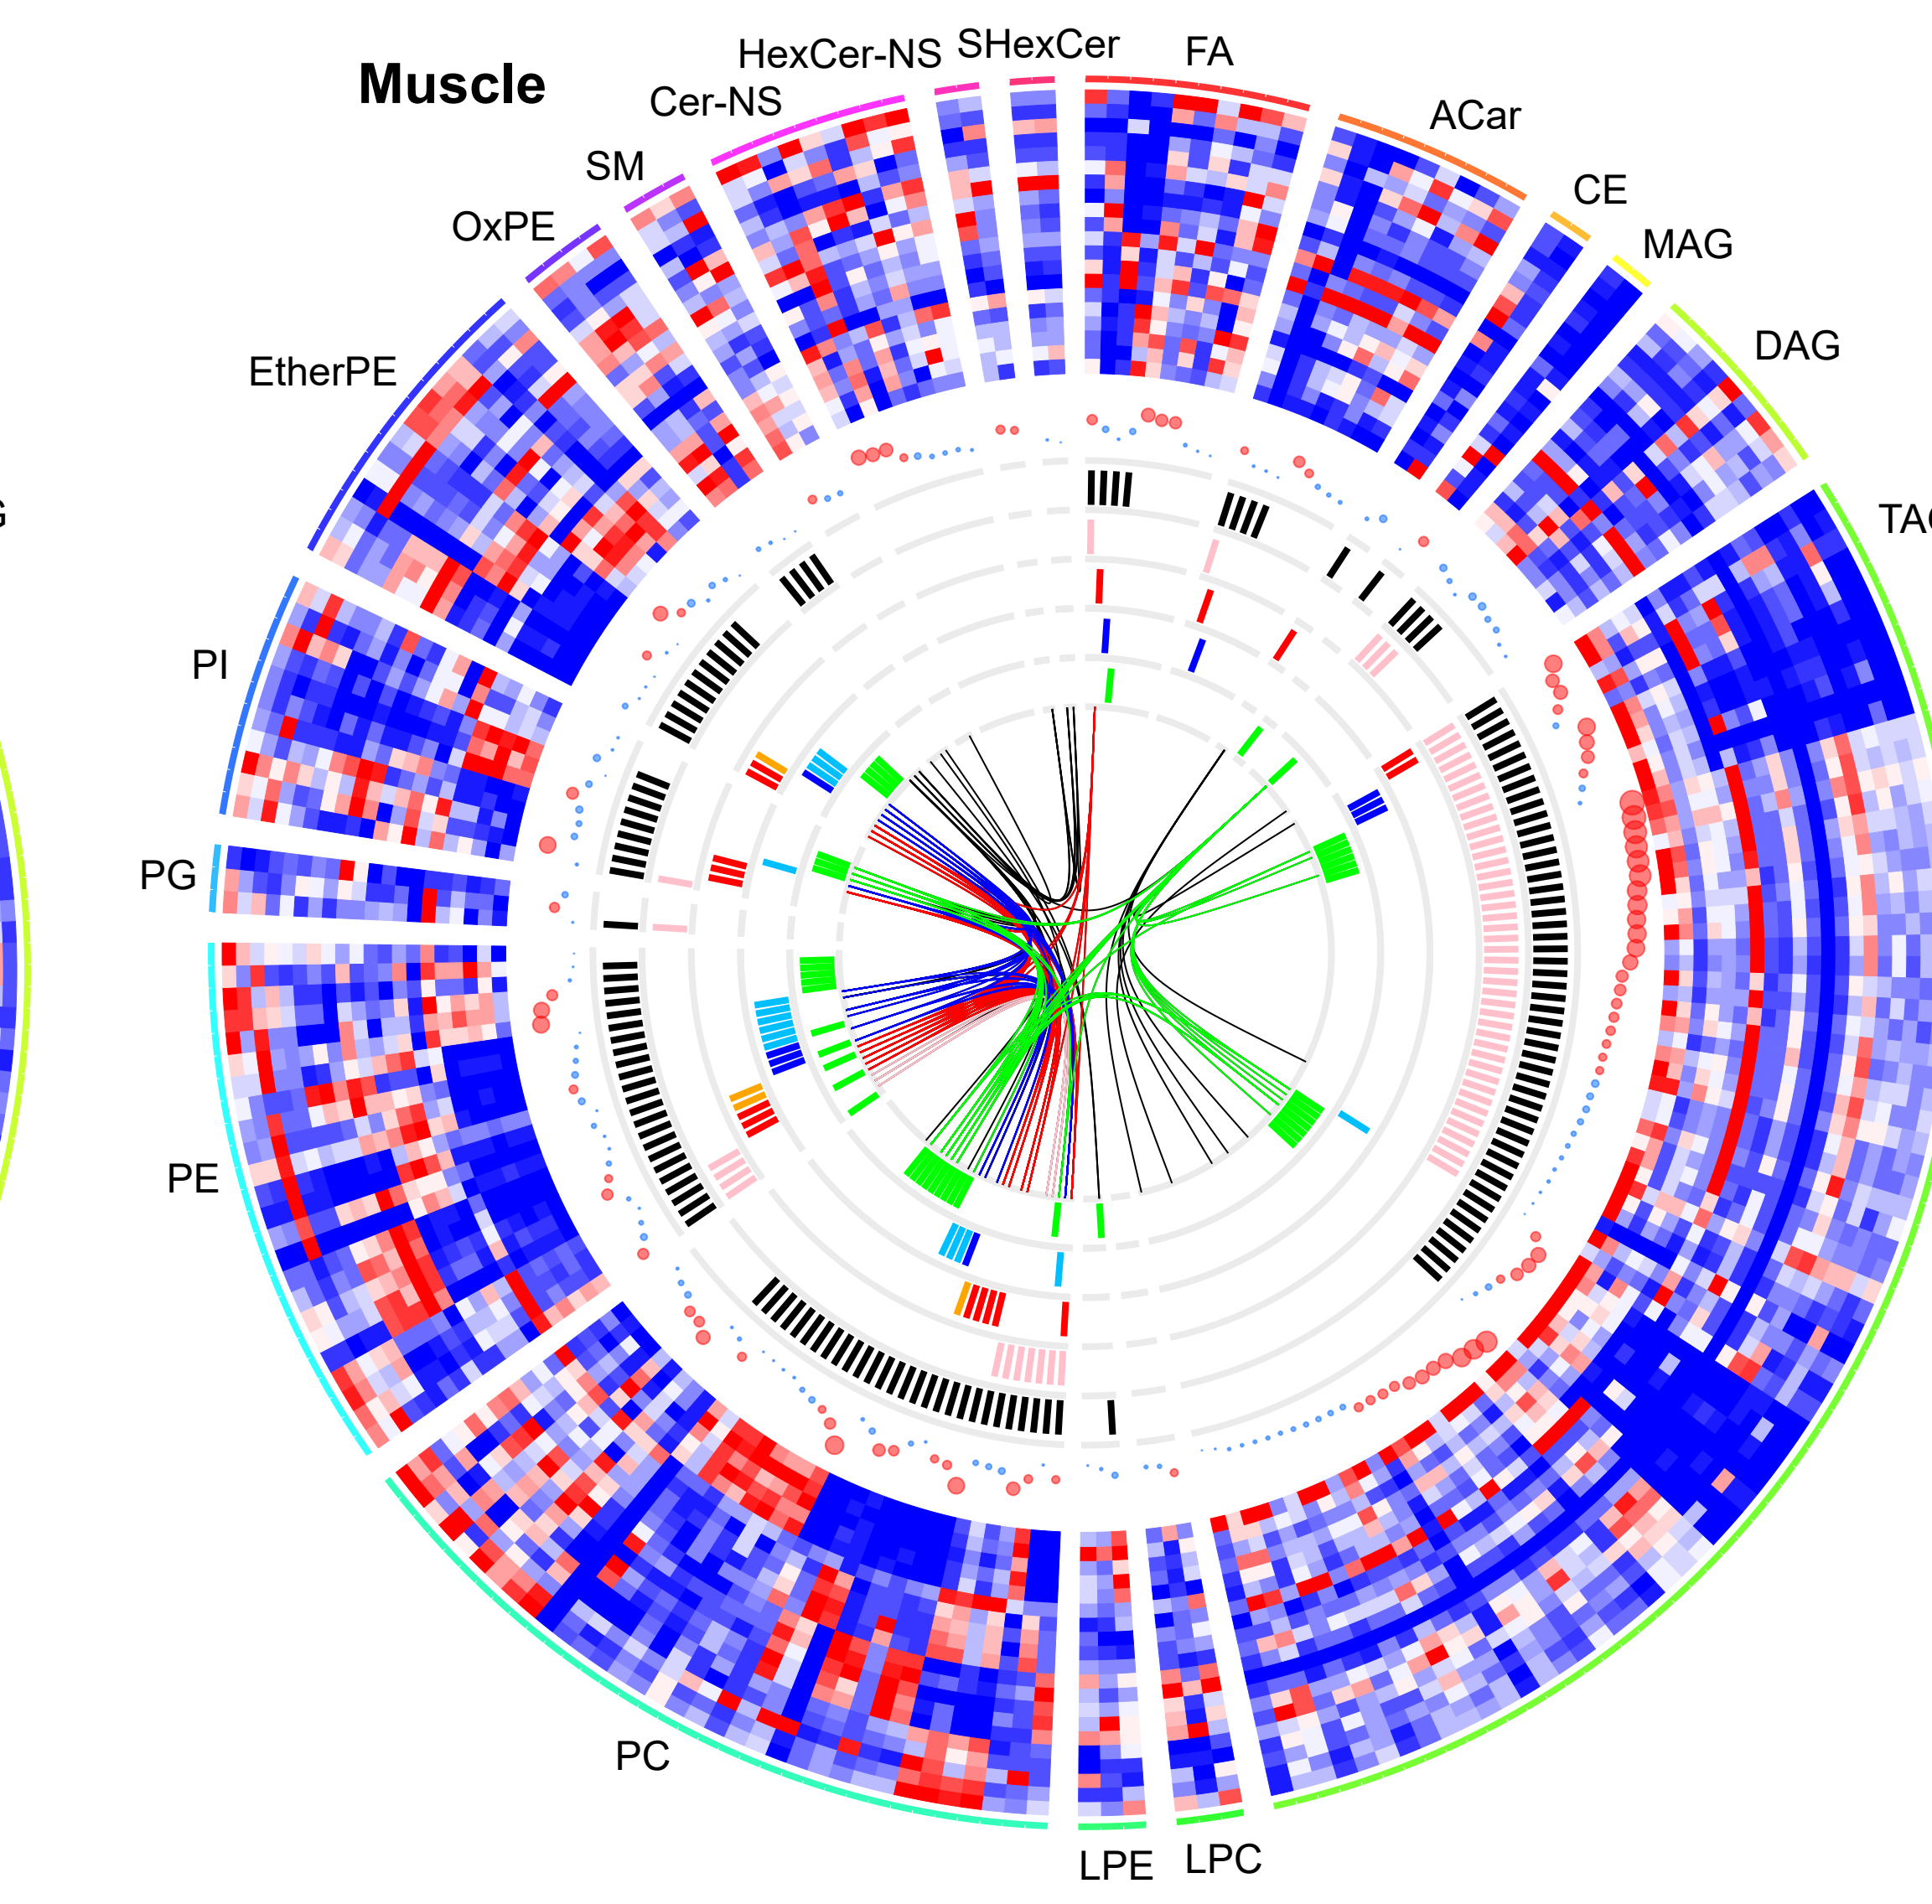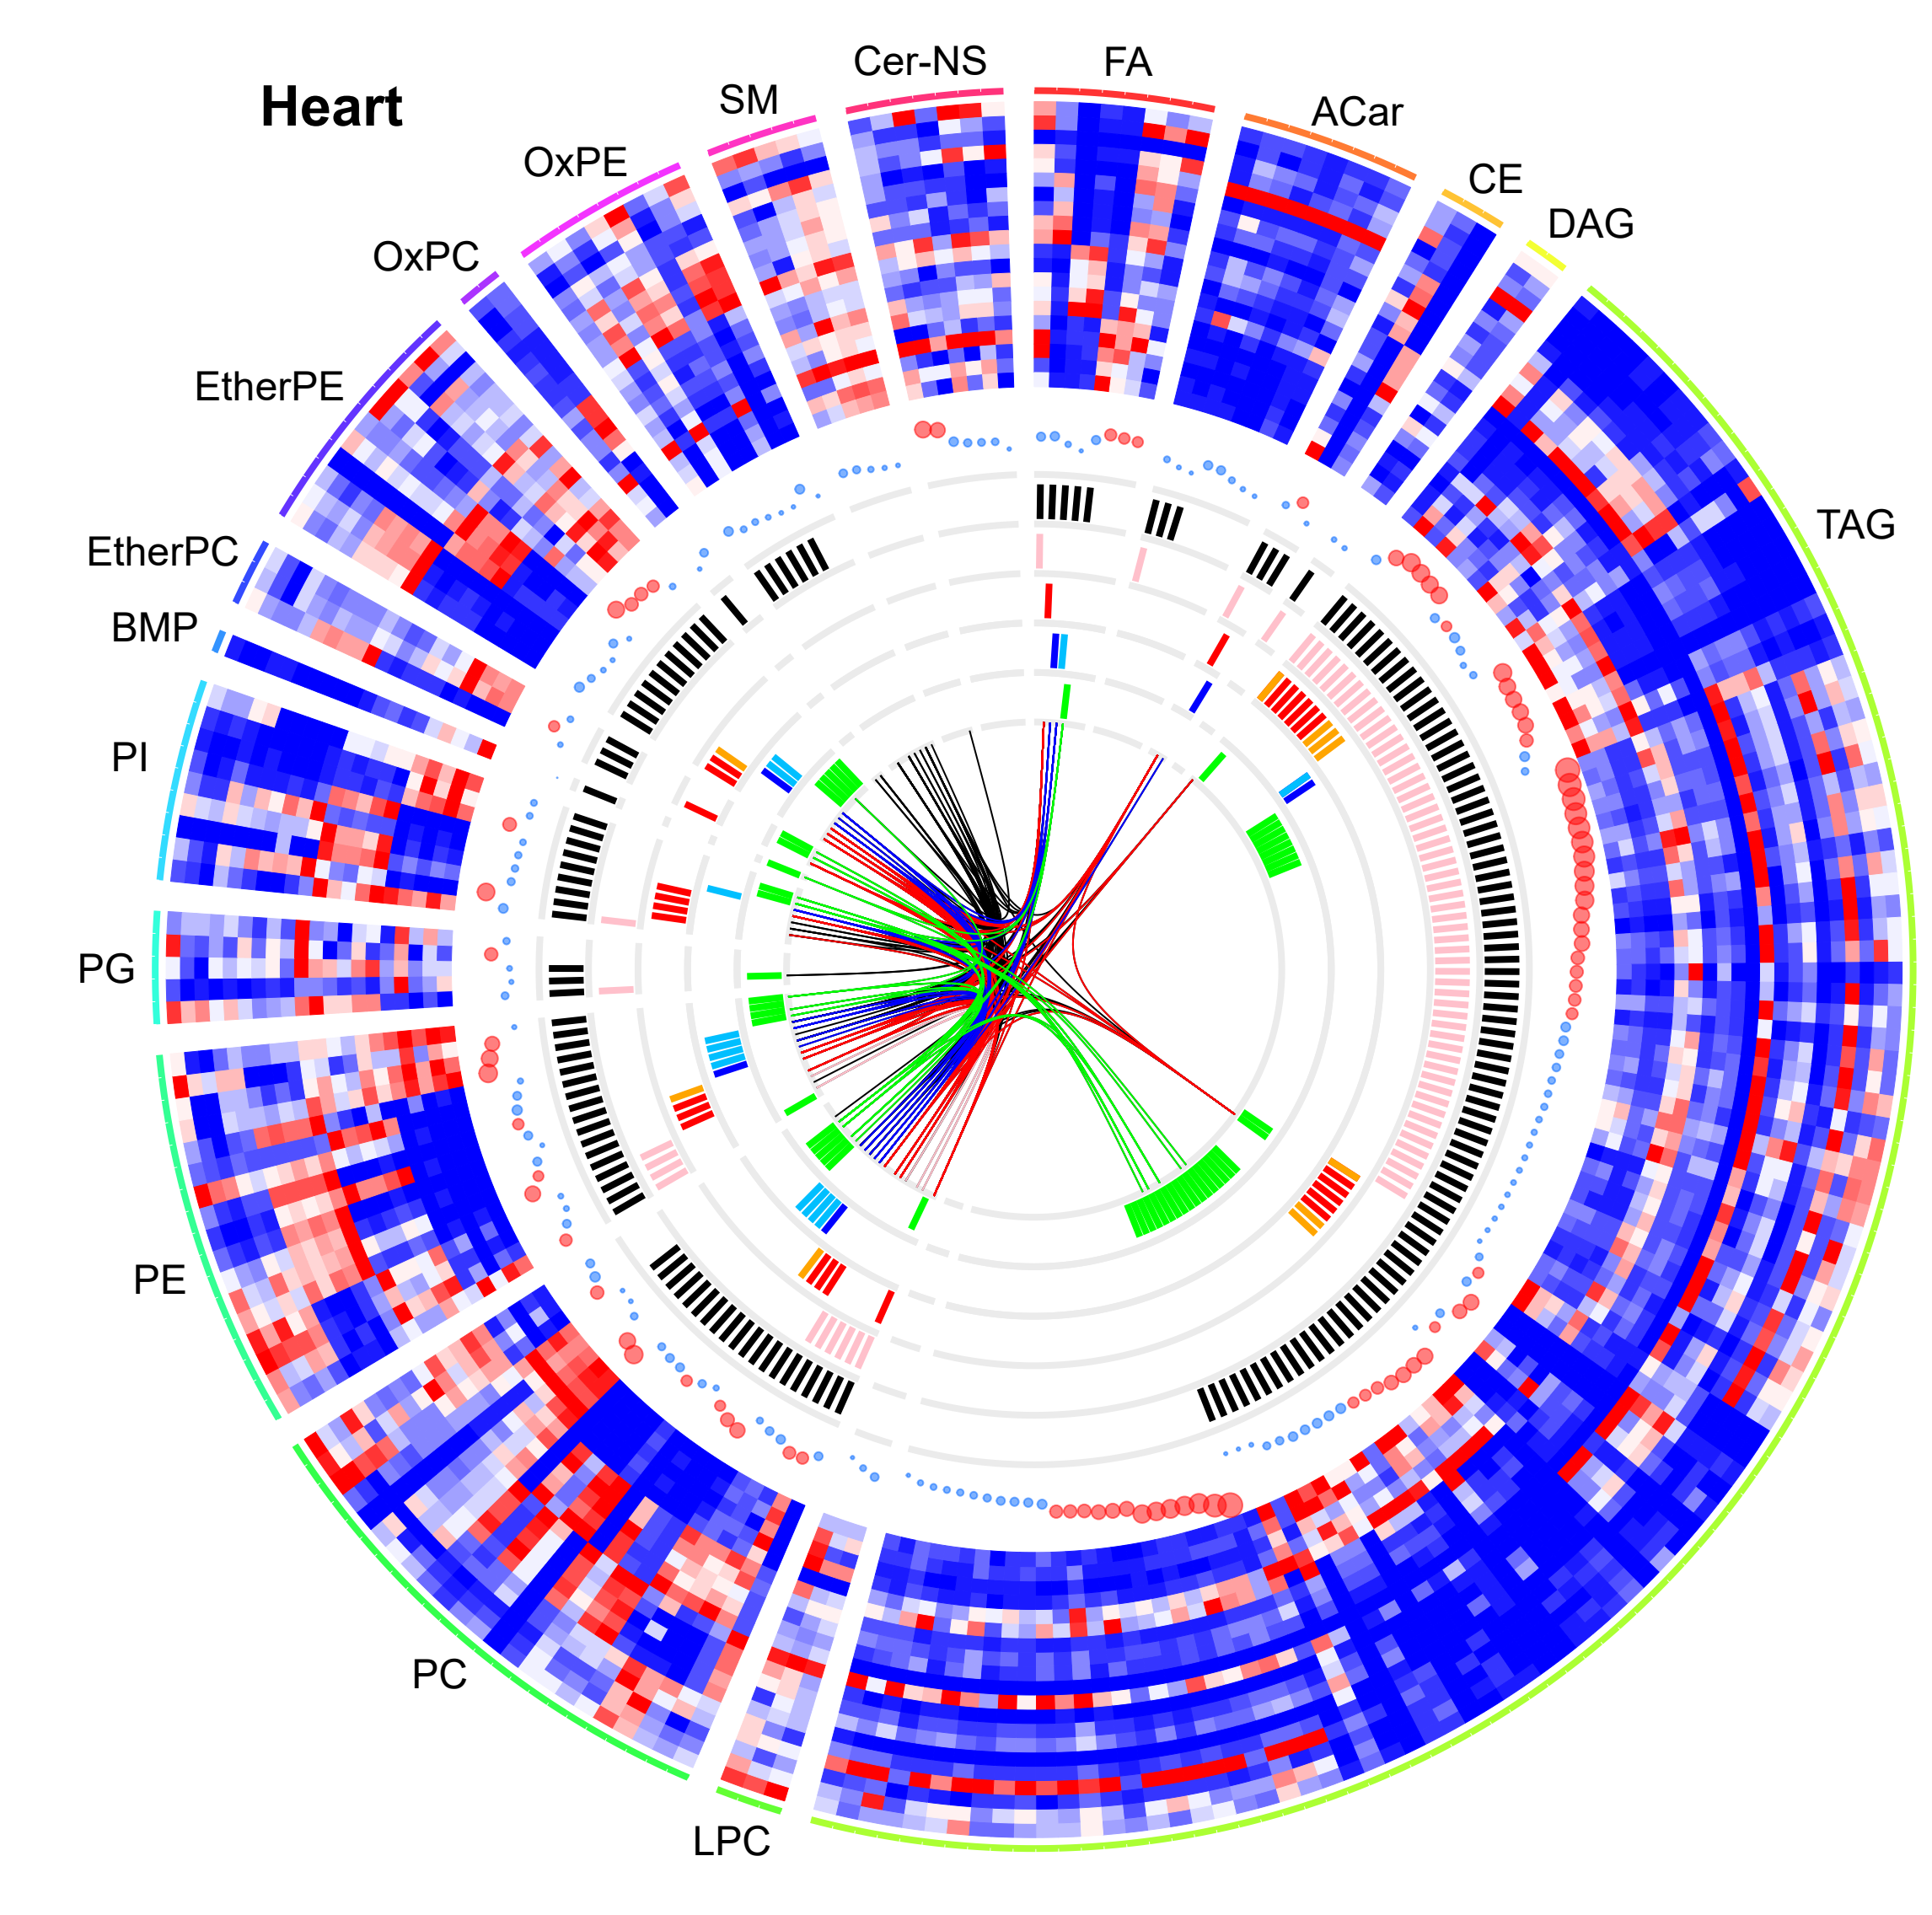

Supplement: s1 [file s1]
